# Supplementary material for: Rational design of potent small molecule SMARCA2/A4(BRM/BRG1) degraders acting via the recruitment of FBXO22
Source: Research Square preprint supplement (doi:10.21203/rs.3.rs-6033426/v1), 2025-03-10
Supplement: Supplementary file 1 [file 0a86db6eadef660264982696.xlsx]

## Sheet: Sheet1
Site	Protease	Sequence (G-6599 modified C)	Peptide charge state				Sum int.	%Mod
			+2	+3	+4	+5
C117	trypsin	ILPHTVLYMADSETFISLEECR	45800000	801000000	0	0	847000000	9.28
		ILPHTVLYMADSETFISLEECR	0	0	40900000	45700000	86600000
C228	trypsin	VVLVFGYNCCK	6420000000	3790000	0	0	6420000000	28.22
		VVLVFGYNCCK	34600000	831000000	1660000000	0	2530000000
C228	chymotrypsin	NCCKVGASNY	772000000	0	0	0	772000000	32.92
		NCCKVGASNY	0	336000000	42700000	0	379000000
C326	trypsin	AANIPEHNTIGFMFACVGR	1760000000	14100000000	0	0	15900000000	0.09
		AANIPEHNTIGFMFACVGR	0	0	6890000	7200000	14100000
