# Supplementary material for: Rational design of potent small molecule SMARCA2/A4(BRM/BRG1) degraders acting via the recruitment of FBXO22
Source: Research Square preprint supplement (doi:10.21203/rs.3.rs-6033426/v1), 2025-03-10
Supplement: Supplementary file 2 [file 2ae7064d96ee0be5a9e85b17.xlsx]

## Sheet: Sheet1
Protein ID	Uniprot Accession	Protein description	Gene	Protein and site	Comparison	log2FC	SE	Tvalue	DF	pvalue	adj.pvalue
1433B_HUMAN	P31946	14-3-3 protein beta/alpha	YWHAB	1433B_HUMAN|P31946_K51	G-6599_DMSO_30min	-0.391122	0.301176	-1.29865	25.8999	0.205508	0.723177
1433B_HUMAN	P31946	14-3-3 protein beta/alpha	YWHAB	1433B_HUMAN|P31946_K160	G-6599_DMSO_30min	-0.420395	0.298285	-1.40937	26.0988	0.17053	0.699019
1433B_HUMAN	P31946	14-3-3 protein beta/alpha	YWHAB	1433B_HUMAN|P31946_K122	G-6599_DMSO_30min	-0.287431	0.261051	-1.10105	29.0634	0.279909	0.777794
1433B_HUMAN	P31946	14-3-3 protein beta/alpha	YWHAB	1433B_HUMAN|P31946_K117	G-6599_DMSO_30min	-0.373281	0.277446	-1.34542	27.6741	0.189411	0.706959
1433B_HUMAN	P31946	14-3-3 protein beta/alpha	YWHAB	1433B_HUMAN|P31946_K11	G-6599_DMSO_30min	-0.29007	0.261334	-1.10996	29.0387	0.276124	0.775575
1433E_HUMAN	P62258	14-3-3 protein epsilon	YWHAE	1433E_HUMAN|P62258_K123	G-6599_DMSO_30min	-0.334941	0.251344	-1.3326	18.3514	0.198974	0.71668
1433E_HUMAN	P62258	14-3-3 protein epsilon	YWHAE	1433E_HUMAN|P62258_K50	G-6599_DMSO_30min	-0.392116	0.261315	-1.50055	18.1845	0.150636	0.680089
1433E_HUMAN	P62258	14-3-3 protein epsilon	YWHAE	1433E_HUMAN|P62258_K125	G-6599_DMSO_30min	-0.130539	0.274135	-0.476184	17.9976	0.639673	0.921641
1433E_HUMAN	P62258	14-3-3 protein epsilon	YWHAE	1433E_HUMAN|P62258_K244	G-6599_DMSO_30min	-0.488494	0.752967	-0.648759	16.4556	0.525445	0.885585
1433E_HUMAN	P62258	14-3-3 protein epsilon	YWHAE	1433E_HUMAN|P62258_K118	G-6599_DMSO_30min	0.252493	0.419092	0.602475	16.9662	0.554825	0.890628
1433E_HUMAN	P62258	14-3-3 protein epsilon	YWHAE	1433E_HUMAN|P62258_K142	G-6599_DMSO_30min	0.330874	1.00284	0.329937	16.3574	0.745635	0.953513
1433G_HUMAN	P61981	14-3-3 protein gamma	YWHAG	1433G_HUMAN|P61981_K142	G-6599_DMSO_30min	0.0119379	0.403699	0.0295712	17.6035	0.976742	0.997104
1433S_HUMAN	P31947	14-3-3 protein sigma	SFN	1433S_HUMAN|P31947_K49	G-6599_DMSO_30min	-0.225106	0.256035	-0.879204	18.482	0.390579	0.824931
1433S_HUMAN	P31947	14-3-3 protein sigma	SFN	1433S_HUMAN|P31947_K9	G-6599_DMSO_30min	-0.496963	0.265726	-1.87021	18.312	0.0775281	0.618717
1433T_HUMAN	P27348	14-3-3 protein theta	YWHAQ	1433T_HUMAN|P27348_K9	G-6599_DMSO_30min	-0.418795	0.248533	-1.68507	23.2514	0.105353	0.645285
1433T_HUMAN	P27348	14-3-3 protein theta	YWHAQ	1433T_HUMAN|P27348_K68	G-6599_DMSO_30min	-0.229105	0.294876	-0.776954	21.0473	0.445831	0.852249
1433T_HUMAN	P27348	14-3-3 protein theta	YWHAQ	1433T_HUMAN|P27348_K27	G-6599_DMSO_30min	-0.100989	0.333656	-0.302672	19.9092	0.765279	0.957719
1433T_HUMAN	P27348	14-3-3 protein theta	YWHAQ	1433T_HUMAN|P27348_K115	G-6599_DMSO_30min	-0.328043	0.310724	-1.05574	20.5257	0.303357	0.793256
1433T_HUMAN	P27348	14-3-3 protein theta	YWHAQ	1433T_HUMAN|P27348_K49	G-6599_DMSO_30min	-0.533128	0.267167	-1.99548	22.2162	0.058396	0.594389
1433Z_HUMAN	P63104	14-3-3 protein zeta/delta	YWHAZ	1433Z_HUMAN|P63104_K115	G-6599_DMSO_30min	-0.424694	0.270242	-1.57153	21.3058	0.130793	0.667972
1433Z_HUMAN	P63104	14-3-3 protein zeta/delta	YWHAZ	1433Z_HUMAN|P63104_K68	G-6599_DMSO_30min	0.00687694	0.362565	0.0189675	18.9148	0.985066	0.997403
1433Z_HUMAN	P63104	14-3-3 protein zeta/delta	YWHAZ	1433Z_HUMAN|P63104_K74	G-6599_DMSO_30min	-0.244046	0.420985	-0.579702	18.1867	0.569228	0.89573
1433Z_HUMAN	P63104	14-3-3 protein zeta/delta	YWHAZ	1433Z_HUMAN|P63104_K157	G-6599_DMSO_30min	-0.271382	0.39225	-0.691861	18.5014	0.497616	0.871587
1433Z_HUMAN	P63104	14-3-3 protein zeta/delta	YWHAZ	1433Z_HUMAN|P63104_K9	G-6599_DMSO_30min	-0.214104	0.238324	-0.898371	22.9264	0.378326	0.823239
1433Z_HUMAN	P63104	14-3-3 protein zeta/delta	YWHAZ	1433Z_HUMAN|P63104_K138	G-6599_DMSO_30min	0.888876	1.27124	0.699221	16.4356	0.494191	0.870304
2A5D_HUMAN	Q14738	Serine/threonine-protein phosphatase 2A 56 kDa regulatory subunit delta isoform	PPP2R5D	2A5D_HUMAN|Q14738_K232	G-6599_DMSO_30min	-0.11336	0.308742	-0.367169	20.3006	0.717293	0.944983
2A5D_HUMAN	Q14738	Serine/threonine-protein phosphatase 2A 56 kDa regulatory subunit delta isoform	PPP2R5D	2A5D_HUMAN|Q14738_K367	G-6599_DMSO_30min	-0.277196	0.419365	-0.660989	18.3418	0.516836	0.882185
2A5E_HUMAN	Q16537	Serine/threonine-protein phosphatase 2A 56 kDa regulatory subunit epsilon isoform	PPP2R5E	2A5E_HUMAN|Q16537_K41	G-6599_DMSO_30min	-0.27893	0.322121	-0.865918	19.7366	0.39694	0.824931
2A5E_HUMAN	Q16537	Serine/threonine-protein phosphatase 2A 56 kDa regulatory subunit epsilon isoform	PPP2R5E	2A5E_HUMAN|Q16537_K346	G-6599_DMSO_30min	-0.138269	0.266831	-0.518188	21.5197	0.609614	0.909948
2AAA_HUMAN	P30153	Serine/threonine-protein phosphatase 2A 65 kDa regulatory subunit A alpha isoform	PPP2R1A	2AAA_HUMAN|P30153_K34	G-6599_DMSO_30min	0.107285	0.335379	0.319892	20.0816	0.752355	0.953836
2AAA_HUMAN	P30153	Serine/threonine-protein phosphatase 2A 65 kDa regulatory subunit A alpha isoform	PPP2R1A	2AAA_HUMAN|P30153_K292	G-6599_DMSO_30min	-0.0322663	0.458402	-0.0703885	18.2055	0.944652	0.992029
2AAA_HUMAN	P30153	Serine/threonine-protein phosphatase 2A 65 kDa regulatory subunit A alpha isoform	PPP2R1A	2AAA_HUMAN|P30153_K280	G-6599_DMSO_30min	-0.299013	0.330369	-0.905088	20.2098	0.376083	0.823239
2AAA_HUMAN	P30153	Serine/threonine-protein phosphatase 2A 65 kDa regulatory subunit A alpha isoform	PPP2R1A	2AAA_HUMAN|P30153_K305	G-6599_DMSO_30min	-0.300952	0.285888	-1.05269	21.6931	0.304067	0.793256
2AAA_HUMAN	P30153	Serine/threonine-protein phosphatase 2A 65 kDa regulatory subunit A alpha isoform	PPP2R1A	2AAA_HUMAN|P30153_K307	G-6599_DMSO_30min	0.509779	0.831999	0.612716	16.8084	0.548265	0.888969
2AAA_HUMAN	P30153	Serine/threonine-protein phosphatase 2A 65 kDa regulatory subunit A alpha isoform	PPP2R1A	2AAA_HUMAN|P30153_K467	G-6599_DMSO_30min	-0.201084	0.248118	-0.810436	23.6964	0.425754	0.839401
2AAA_HUMAN	P30153	Serine/threonine-protein phosphatase 2A 65 kDa regulatory subunit A alpha isoform	PPP2R1A	2AAA_HUMAN|P30153_K331	G-6599_DMSO_30min	-0.31804	0.572952	-0.555091	17.4709	0.58587	0.903775
2AAA_HUMAN	P30153	Serine/threonine-protein phosphatase 2A 65 kDa regulatory subunit A alpha isoform	PPP2R1A	2AAA_HUMAN|P30153_K266	G-6599_DMSO_30min	0.0569272	0.459363	0.123926	18.1968	0.902732	0.988789
2AAA_HUMAN	P30153	Serine/threonine-protein phosphatase 2A 65 kDa regulatory subunit A alpha isoform	PPP2R1A	2AAA_HUMAN|P30153_K272	G-6599_DMSO_30min	-0.185676	0.346999	-0.535091	19.8074	0.598544	0.905918
2AAA_HUMAN	P30153	Serine/threonine-protein phosphatase 2A 65 kDa regulatory subunit A alpha isoform	PPP2R1A	2AAA_HUMAN|P30153_K202	G-6599_DMSO_30min	0.134879	0.563416	0.239395	17.5148	0.813578	0.966647
2AAA_HUMAN	P30153	Serine/threonine-protein phosphatase 2A 65 kDa regulatory subunit A alpha isoform	PPP2R1A	2AAA_HUMAN|P30153_K188	G-6599_DMSO_30min	-0.223904	0.252656	-0.8862	23.4046	0.384525	0.824931
2AAB_HUMAN	P30154	Serine/threonine-protein phosphatase 2A 65 kDa regulatory subunit A beta isoform	PPP2R1B	2AAB_HUMAN|P30154_K317	G-6599_DMSO_30min	-0.236315	0.242003	-0.976495	18.8486	0.341186	0.806466
2ABA_HUMAN	P63151	Serine/threonine-protein phosphatase 2A 55 kDa regulatory subunit B alpha isoform	PPP2R2A	2ABA_HUMAN|P63151_K88	G-6599_DMSO_30min	-0.412861	0.397974	-1.03741	17.4691	0.313693	0.795929
2ABA_HUMAN	P63151	Serine/threonine-protein phosphatase 2A 55 kDa regulatory subunit B alpha isoform	PPP2R2A	2ABA_HUMAN|P63151_K62	G-6599_DMSO_30min	-0.626487	0.277907	-2.25431	18.8608	0.036268	0.553837
3BP5_HUMAN	O60239	SH3 domain-binding protein 5	SH3BP5	3BP5_HUMAN|O60239_K217	G-6599_DMSO_30min	-0.0998102	0.231191	-0.431722	24.1997	0.669765	0.930404
3BP5L_HUMAN	Q7L8J4	SH3 domain-binding protein 5-like	SH3BP5L	3BP5L_HUMAN|Q7L8J4_K254	G-6599_DMSO_30min	-0.0473405	0.328526	-0.1441	32.0862	0.886323	0.984066
3BP5L_HUMAN	Q7L8J4	SH3 domain-binding protein 5-like	SH3BP5L	3BP5L_HUMAN|Q7L8J4_K124	G-6599_DMSO_30min	-0.0539585	0.417584	-0.129216	27.5759	0.898125	0.987562
3BP5L_HUMAN	Q7L8J4	SH3 domain-binding protein 5-like	SH3BP5L	3BP5L_HUMAN|Q7L8J4_K240	G-6599_DMSO_30min	-0.221597	0.328704	-0.674153	32.083	0.505043	0.87472
3MG_HUMAN	P29372	DNA-3-methyladenine glycosylase	MPG	3MG_HUMAN|P29372_K229	G-6599_DMSO_30min	-0.568448	0.257995	-2.20333	19.2623	0.0399332	0.553837
4F2_HUMAN	P08195	4F2 cell-surface antigen heavy chain	SLC3A2	4F2_HUMAN|P08195_K122_K140	G-6599_DMSO_30min	-0.456158	0.306912	-1.48628	20.4103	0.152489	0.68408
4F2_HUMAN	P08195	4F2 cell-surface antigen heavy chain	SLC3A2	4F2_HUMAN|P08195_K257	G-6599_DMSO_30min	-0.0204631	0.294556	-0.0694708	20.803	0.945278	0.99204
4F2_HUMAN	P08195	4F2 cell-surface antigen heavy chain	SLC3A2	4F2_HUMAN|P08195_K615	G-6599_DMSO_30min	-0.102798	0.27325	-0.376207	21.6229	0.710429	0.943045
4F2_HUMAN	P08195	4F2 cell-surface antigen heavy chain	SLC3A2	4F2_HUMAN|P08195_K245	G-6599_DMSO_30min	-0.188779	0.277318	-0.680732	21.4503	0.503324	0.873923
4F2_HUMAN	P08195	4F2 cell-surface antigen heavy chain	SLC3A2	4F2_HUMAN|P08195_K166	G-6599_DMSO_30min	0.05839	0.319319	0.182858	20.0649	0.856744	0.976159
4F2_HUMAN	P08195	4F2 cell-surface antigen heavy chain	SLC3A2	4F2_HUMAN|P08195_K140	G-6599_DMSO_30min	-0.256731	0.357587	-0.717953	19.2335	0.481417	0.865912
4F2_HUMAN	P08195	4F2 cell-surface antigen heavy chain	SLC3A2	4F2_HUMAN|P08195_K145	G-6599_DMSO_30min	-0.380539	0.285369	-1.3335	21.1321	0.196564	0.714483
4F2_HUMAN	P08195	4F2 cell-surface antigen heavy chain	SLC3A2	4F2_HUMAN|P08195_K145_K147	G-6599_DMSO_30min	-0.346044	0.323432	-1.06991	19.9598	0.297427	0.790224
4F2_HUMAN	P08195	4F2 cell-surface antigen heavy chain	SLC3A2	4F2_HUMAN|P08195_K160	G-6599_DMSO_30min	0.0924197	0.503323	0.183619	17.6902	0.856401	0.976159
4F2_HUMAN	P08195	4F2 cell-surface antigen heavy chain	SLC3A2	4F2_HUMAN|P08195_K171	G-6599_DMSO_30min	-0.341076	0.264798	-1.28806	22.0096	0.211104	0.727054
4F2_HUMAN	P08195	4F2 cell-surface antigen heavy chain	SLC3A2	4F2_HUMAN|P08195_K255	G-6599_DMSO_30min	-0.0640389	0.253259	-0.252859	22.6067	0.802662	0.964821
4F2_HUMAN	P08195	4F2 cell-surface antigen heavy chain	SLC3A2	4F2_HUMAN|P08195_K147	G-6599_DMSO_30min	0.292887	0.895337	0.327125	16.6795	0.747643	0.953513
5NT3A_HUMAN	Q9H0P0	Cytosolic 5'-nucleotidase 3A	NT5C3A	5NT3A_HUMAN|Q9H0P0_K77	G-6599_DMSO_30min	0.0199467	0.278418	0.0716429	18.454	0.943657	0.992029
5NTC_HUMAN	P49902	Cytosolic purine 5'-nucleotidase	NT5C2	5NTC_HUMAN|P49902_K308	G-6599_DMSO_30min	-0.672912	0.317359	-2.12035	17.6221	0.048442	0.57658
5NTC_HUMAN	P49902	Cytosolic purine 5'-nucleotidase	NT5C2	5NTC_HUMAN|P49902_K211	G-6599_DMSO_30min	-0.179325	0.248092	-0.722817	18.5625	0.478801	0.864834
5NTD_HUMAN	P21589	5'-nucleotidase	NT5E	5NTD_HUMAN|P21589_K147	G-6599_DMSO_30min	-0.108122	0.26458	-0.408656	21.1453	0.686901	0.93739
6PGD_HUMAN	P52209	6-phosphogluconate dehydrogenase, decarboxylating	PGD	6PGD_HUMAN|P52209_K119	G-6599_DMSO_30min	-0.222326	0.371388	-0.598635	17.5354	0.557071	0.891119
6PGD_HUMAN	P52209	6-phosphogluconate dehydrogenase, decarboxylating	PGD	6PGD_HUMAN|P52209_K59	G-6599_DMSO_30min	-0.406065	0.284567	-1.42695	18.5089	0.170246	0.698977
6PGD_HUMAN	P52209	6-phosphogluconate dehydrogenase, decarboxylating	PGD	6PGD_HUMAN|P52209_K51	G-6599_DMSO_30min	-0.184161	0.258032	-0.713713	19.0364	0.484064	0.86687
A16A1_HUMAN	Q8IZ83	Aldehyde dehydrogenase family 16 member A1	ALDH16A1	A16A1_HUMAN|Q8IZ83_K114	G-6599_DMSO_30min	-0.34004	0.258433	-1.31577	18.4599	0.204358	0.722484
A4_HUMAN	P05067	Amyloid beta A4 protein	APP	A4_HUMAN|P05067_K751	G-6599_DMSO_30min	0.0137585	0.398774	0.0345021	17.7824	0.972861	0.996087
A4_HUMAN	P05067	Amyloid beta A4 protein	APP	A4_HUMAN|P05067_K763	G-6599_DMSO_30min	-0.436904	0.339555	-1.2867	18.4049	0.214149	0.730684
AAAS_HUMAN	Q9NRG9	Aladin	AAAS	AAAS_HUMAN|Q9NRG9_K366	G-6599_DMSO_30min	-0.257174	0.264735	-0.971438	19.8375	0.343027	0.807214
AAAT_HUMAN	Q15758	Neutral amino acid transporter B(0)	SLC1A5	AAAT_HUMAN|Q15758_K372	G-6599_DMSO_30min	-0.361065	0.265645	-1.3592	20.9581	0.18853	0.706959
AAAT_HUMAN	Q15758	Neutral amino acid transporter B(0)	SLC1A5	AAAT_HUMAN|Q15758_K10	G-6599_DMSO_30min	-0.040806	0.606185	-0.0673162	17.0602	0.947113	0.992353
AAAT_HUMAN	Q15758	Neutral amino acid transporter B(0)	SLC1A5	AAAT_HUMAN|Q15758_K502	G-6599_DMSO_30min	-0.341246	0.342347	-0.996785	18.9605	0.331421	0.803357
AAAT_HUMAN	Q15758	Neutral amino acid transporter B(0)	SLC1A5	AAAT_HUMAN|Q15758_K522	G-6599_DMSO_30min	-0.342525	0.286611	-1.19508	20.235	0.245874	0.755556
AAAT_HUMAN	Q15758	Neutral amino acid transporter B(0)	SLC1A5	AAAT_HUMAN|Q15758_K502_K522	G-6599_DMSO_30min	-0.610158	0.325758	-1.87304	19.2668	0.0763166	0.616877
AAAT_HUMAN	Q15758	Neutral amino acid transporter B(0)	SLC1A5	AAAT_HUMAN|Q15758_K537	G-6599_DMSO_30min	-0.109694	0.493872	-0.22211	17.4952	0.8268	0.968923
AAGAB_HUMAN	Q6PD74	Alpha- and gamma-adaptin-binding protein p34	AAGAB	AAGAB_HUMAN|Q6PD74_K275	G-6599_DMSO_30min	-0.498242	0.332867	-1.49682	18.1894	0.151592	0.681236
AAKB1_HUMAN	Q9Y478	5'-AMP-activated protein kinase subunit beta-1	PRKAB1	AAKB1_HUMAN|Q9Y478_K268	G-6599_DMSO_30min	-0.0094157	0.299666	-0.0314206	21.0966	0.975229	0.997104
AAKG1_HUMAN	P54619	5'-AMP-activated protein kinase subunit gamma-1	PRKAG1	AAKG1_HUMAN|P54619_K234	G-6599_DMSO_30min	0.0492973	0.262758	0.187615	18.4912	0.853222	0.975872
AAKG1_HUMAN	P54619	5'-AMP-activated protein kinase subunit gamma-1	PRKAG1	AAKG1_HUMAN|P54619_K170	G-6599_DMSO_30min	0.0815571	0.245099	0.332752	18.8511	0.742994	0.953312
AAKG1_HUMAN	P54619	5'-AMP-activated protein kinase subunit gamma-1	PRKAG1	AAKG1_HUMAN|P54619_K78	G-6599_DMSO_30min	-0.0989843	0.223476	-0.44293	19.4244	0.66271	0.928183
AAKG1_HUMAN	P54619	5'-AMP-activated protein kinase subunit gamma-1	PRKAG1	AAKG1_HUMAN|P54619_K253	G-6599_DMSO_30min	0.262851	0.560143	0.469256	16.7053	0.644953	0.922459
AAKG1_HUMAN	P54619	5'-AMP-activated protein kinase subunit gamma-1	PRKAG1	AAKG1_HUMAN|P54619_K58	G-6599_DMSO_30min	0.0338885	0.267454	0.126707	18.408	0.900546	0.988612
AAMP_HUMAN	Q13685	Angio-associated migratory cell protein	AAMP	AAMP_HUMAN|Q13685_K245	G-6599_DMSO_30min	-0.370506	0.326828	-1.13364	18.8134	0.271184	0.771714
AAPK1_HUMAN	Q13131	5'-AMP-activated protein kinase catalytic subunit alpha-1	PRKAA1	AAPK1_HUMAN|Q13131_K436	G-6599_DMSO_30min	-0.219536	0.404518	-0.542711	17.7036	0.594096	0.905892
AAPK1_HUMAN	Q13131	5'-AMP-activated protein kinase catalytic subunit alpha-1	PRKAA1	AAPK1_HUMAN|Q13131_K429	G-6599_DMSO_30min	-0.125851	0.373999	-0.336501	17.9655	0.740392	0.951851
AAPK2_HUMAN	P54646	5'-AMP-activated protein kinase catalytic subunit alpha-2	PRKAA2	AAPK2_HUMAN|P54646_K391	G-6599_DMSO_30min	-0.413397	0.244089	-1.69363	21.0841	0.105059	0.645285
AAR2_HUMAN	Q9Y312	Protein AAR2 homolog	AAR2	AAR2_HUMAN|Q9Y312_K131	G-6599_DMSO_30min	-0.284002	0.266651	-1.06507	20.0462	0.299505	0.790337
AATC_HUMAN	P17174	Aspartate aminotransferase, cytoplasmic	GOT1	AATC_HUMAN|P17174_K290	G-6599_DMSO_30min	0.0736334	0.759132	0.0969969	16.6299	0.923888	0.991061
AATC_HUMAN	P17174	Aspartate aminotransferase, cytoplasmic	GOT1	AATC_HUMAN|P17174_K378	G-6599_DMSO_30min	-0.381435	0.288854	-1.32051	19.1733	0.202211	0.718566
AATC_HUMAN	P17174	Aspartate aminotransferase, cytoplasmic	GOT1	AATC_HUMAN|P17174_K97	G-6599_DMSO_30min	-0.0444399	0.270348	-0.16438	19.6238	0.871113	0.97997
AATF_HUMAN	Q9NY61	Protein AATF	AATF	AATF_HUMAN|Q9NY61_K228	G-6599_DMSO_30min	-0.0422483	0.363087	-0.116359	17.886	0.908665	0.98904
AATF_HUMAN	Q9NY61	Protein AATF	AATF	AATF_HUMAN|Q9NY61_K246	G-6599_DMSO_30min	-0.156549	0.268389	-0.583292	19.3704	0.566427	0.894133
AB17B_HUMAN	Q5VST6	Alpha/beta hydrolase domain-containing protein 17B	ABHD17B	AB17B_HUMAN|Q5VST6_K278	G-6599_DMSO_30min	-0.101265	0.351871	-0.287789	18.3989	0.776725	0.95959
AB17C_HUMAN	Q6PCB6	Alpha/beta hydrolase domain-containing protein 17C	ABHD17C	AB17C_HUMAN|Q6PCB6_K32	G-6599_DMSO_30min	-0.1262	0.389025	-0.324401	17.3813	0.749506	0.953836
ABC3C_HUMAN	Q9NRW3	DNA dC->dU-editing enzyme APOBEC-3C	APOBEC3C	ABC3C_HUMAN|Q9NRW3_K10	G-6599_DMSO_30min	-0.728635	0.494025	-1.47489	18.4724	0.157081	0.687084
ABCA3_HUMAN	Q99758	ATP-binding cassette sub-family A member 3	ABCA3	ABCA3_HUMAN|Q99758_K503	G-6599_DMSO_30min	0.129956	0.903755	0.143796	16.4855	0.887405	0.984435
ABCA3_HUMAN	Q99758	ATP-binding cassette sub-family A member 3	ABCA3	ABCA3_HUMAN|Q99758_K1668	G-6599_DMSO_30min	-0.23141	0.24474	-0.945534	20.0201	0.355659	0.815008
ABCA3_HUMAN	Q99758	ATP-binding cassette sub-family A member 3	ABCA3	ABCA3_HUMAN|Q99758_K841	G-6599_DMSO_30min	0.0963867	0.457704	0.210587	17.2442	0.835678	0.971242
ABCA3_HUMAN	Q99758	ATP-binding cassette sub-family A member 3	ABCA3	ABCA3_HUMAN|Q99758_K1384	G-6599_DMSO_30min	-0.3541	0.264579	-1.33835	19.4325	0.196231	0.714483
ABCA3_HUMAN	Q99758	ATP-binding cassette sub-family A member 3	ABCA3	ABCA3_HUMAN|Q99758_K531	G-6599_DMSO_30min	0.00975166	0.443584	0.0219838	17.3117	0.982712	0.997244
ABCB6_HUMAN	Q9NP58	ATP-binding cassette sub-family B member 6, mitochondrial	ABCB6	ABCB6_HUMAN|Q9NP58_K726	G-6599_DMSO_30min	-0.175981	0.283484	-0.620778	27.4495	0.539867	0.886675
ABCB6_HUMAN	Q9NP58	ATP-binding cassette sub-family B member 6, mitochondrial	ABCB6	ABCB6_HUMAN|Q9NP58_K464	G-6599_DMSO_30min	0.11689	0.422584	0.276607	20.9546	0.784792	0.962414
ABCB6_HUMAN	Q9NP58	ATP-binding cassette sub-family B member 6, mitochondrial	ABCB6	ABCB6_HUMAN|Q9NP58_K836	G-6599_DMSO_30min	0.138267	0.474447	0.291428	19.9007	0.77374	0.959236
ABCB6_HUMAN	Q9NP58	ATP-binding cassette sub-family B member 6, mitochondrial	ABCB6	ABCB6_HUMAN|Q9NP58_K482	G-6599_DMSO_30min	-0.108399	0.295687	-0.366599	26.5263	0.716826	0.944983
ABCB6_HUMAN	Q9NP58	ATP-binding cassette sub-family B member 6, mitochondrial	ABCB6	ABCB6_HUMAN|Q9NP58_K743	G-6599_DMSO_30min	0.233666	0.501752	0.465699	19.4827	0.646595	0.923477
ABCB6_HUMAN	Q9NP58	ATP-binding cassette sub-family B member 6, mitochondrial	ABCB6	ABCB6_HUMAN|Q9NP58_K771	G-6599_DMSO_30min	-0.356905	0.340315	-1.04875	23.8412	0.30481	0.793269
ABCB6_HUMAN	Q9NP58	ATP-binding cassette sub-family B member 6, mitochondrial	ABCB6	ABCB6_HUMAN|Q9NP58_K798	G-6599_DMSO_30min	0.256416	0.37632	0.681378	22.3283	0.502639	0.873394
ABCD3_HUMAN	P28288	ATP-binding cassette sub-family D member 3	ABCD3	ABCD3_HUMAN|P28288_K260	G-6599_DMSO_30min	-0.287671	0.356251	-0.807496	17.4232	0.430268	0.84226
ABCF1_HUMAN	Q8NE71	ATP-binding cassette sub-family F member 1	ABCF1	ABCF1_HUMAN|Q8NE71_K689	G-6599_DMSO_30min	-0.248717	0.356071	-0.698506	17.4375	0.494072	0.870304
ABCF1_HUMAN	Q8NE71	ATP-binding cassette sub-family F member 1	ABCF1	ABCF1_HUMAN|Q8NE71_K430	G-6599_DMSO_30min	-0.554434	0.287306	-1.92977	18.1174	0.0694455	0.596256
ABD12_HUMAN	Q8N2K0	Monoacylglycerol lipase ABHD12	ABHD12	ABD12_HUMAN|Q8N2K0_K358	G-6599_DMSO_30min	-0.360319	0.258434	-1.39424	21.1354	0.177731	0.702264
ABH15_HUMAN	Q6UXT9	Abhydrolase domain-containing protein 15	ABHD15	ABH15_HUMAN|Q6UXT9_K289	G-6599_DMSO_30min	-0.168468	0.249603	-0.674943	19.9904	0.507444	0.875803
ABHD6_HUMAN	Q9BV23	Monoacylglycerol lipase ABHD6	ABHD6	ABHD6_HUMAN|Q9BV23_K189	G-6599_DMSO_30min	-0.180256	0.276639	-0.651593	21.301	0.521632	0.884199
ABHD6_HUMAN	Q9BV23	Monoacylglycerol lipase ABHD6	ABHD6	ABHD6_HUMAN|Q9BV23_K223	G-6599_DMSO_30min	-0.405703	0.262147	-1.54762	21.9389	0.13602	0.667972
ABHD6_HUMAN	Q9BV23	Monoacylglycerol lipase ABHD6	ABHD6	ABHD6_HUMAN|Q9BV23_K267	G-6599_DMSO_30min	-0.50655	0.294411	-1.72056	20.6539	0.10028	0.637023
ABRX1_HUMAN	Q6UWZ7	NA	NA	ABRX1_HUMAN|Q6UWZ7_K381	G-6599_DMSO_30min	-0.392715	0.465987	-0.842758	16.7054	0.411268	0.830249
ACAP2_HUMAN	Q15057	Arf-GAP with coiled-coil, ANK repeat and PH domain-containing protein 2	ACAP2	ACAP2_HUMAN|Q15057_K106	G-6599_DMSO_30min	0.111487	0.268457	0.415288	17.5383	0.682967	0.935455
ACBD5_HUMAN	Q5T8D3	Acyl-CoA-binding domain-containing protein 5	ACBD5	ACBD5_HUMAN|Q5T8D3_K469	G-6599_DMSO_30min	-0.44442	0.245188	-1.81257	19.5803	0.0852615	0.626271
ACBD5_HUMAN	Q5T8D3	Acyl-CoA-binding domain-containing protein 5	ACBD5	ACBD5_HUMAN|Q5T8D3_K50	G-6599_DMSO_30min	-0.281268	0.297855	-0.944311	18.4414	0.35722	0.815854
ACBD6_HUMAN	Q9BR61	Acyl-CoA-binding domain-containing protein 6	ACBD6	ACBD6_HUMAN|Q9BR61_K205	G-6599_DMSO_30min	-0.103571	0.370591	-0.279475	17.9518	0.783075	0.961841
ACBD6_HUMAN	Q9BR61	Acyl-CoA-binding domain-containing protein 6	ACBD6	ACBD6_HUMAN|Q9BR61_K176	G-6599_DMSO_30min	-0.603992	0.276595	-2.18367	19.4318	0.0414373	0.554812
ACBP_HUMAN	P07108	Acyl-CoA-binding protein	DBI	ACBP_HUMAN|P07108_K19	G-6599_DMSO_30min	0.203222	0.630531	0.322304	16.8604	0.751185	0.953836
ACINU_HUMAN	Q9UKV3	Apoptotic chromatin condensation inducer in the nucleus	ACIN1	ACINU_HUMAN|Q9UKV3_K861	G-6599_DMSO_30min	-0.600104	0.272415	-2.2029	18.7223	0.040339	0.553837
ACINU_HUMAN	Q9UKV3	Apoptotic chromatin condensation inducer in the nucleus	ACIN1	ACINU_HUMAN|Q9UKV3_K823	G-6599_DMSO_30min	-0.221826	0.290776	-0.762874	18.4006	0.455208	0.853715
ACINU_HUMAN	Q9UKV3	Apoptotic chromatin condensation inducer in the nucleus	ACIN1	ACINU_HUMAN|Q9UKV3_K1219	G-6599_DMSO_30min	-0.88686	0.301505	-2.94144	18.2409	0.00863891	0.462987
ACINU_HUMAN	Q9UKV3	Apoptotic chromatin condensation inducer in the nucleus	ACIN1	ACINU_HUMAN|Q9UKV3_K1237	G-6599_DMSO_30min	0.0327801	0.524072	0.0625487	9.59756	0.951409	0.993677
ACL6A_HUMAN	O96019	Actin-like protein 6A	ACTL6A	ACL6A_HUMAN|O96019_K303	G-6599_DMSO_30min	0.262516	0.439268	0.597622	17.1732	0.557891	0.891146
ACL6A_HUMAN	O96019	Actin-like protein 6A	ACTL6A	ACL6A_HUMAN|O96019_K62	G-6599_DMSO_30min	-0.648691	0.294488	-2.20277	18.3956	0.0405849	0.553837
ACLY_HUMAN	P53396	ATP-citrate synthase	ACLY	ACLY_HUMAN|P53396_K259	G-6599_DMSO_30min	-0.000651573	0.315184	-0.00206727	17.7227	0.998374	0.999539
ACLY_HUMAN	P53396	ATP-citrate synthase	ACLY	ACLY_HUMAN|P53396_K369	G-6599_DMSO_30min	-0.0861114	0.252555	-0.340961	18.6068	0.736953	0.950713
ACLY_HUMAN	P53396	ATP-citrate synthase	ACLY	ACLY_HUMAN|P53396_K232	G-6599_DMSO_30min	0.0745963	0.495161	0.150651	16.8207	0.882043	0.983654
ACLY_HUMAN	P53396	ATP-citrate synthase	ACLY	ACLY_HUMAN|P53396_K546	G-6599_DMSO_30min	-0.0653107	0.274924	-0.237559	18.2167	0.814874	0.966647
ACLY_HUMAN	P53396	ATP-citrate synthase	ACLY	ACLY_HUMAN|P53396_K97	G-6599_DMSO_30min	-0.183894	0.243796	-0.754294	18.7919	0.460021	0.856583
ACLY_HUMAN	P53396	ATP-citrate synthase	ACLY	ACLY_HUMAN|P53396_K630	G-6599_DMSO_30min	-0.252346	0.280882	-0.898406	18.1292	0.380746	0.824357
ACLY_HUMAN	P53396	ATP-citrate synthase	ACLY	ACLY_HUMAN|P53396_K562	G-6599_DMSO_30min	0.330372	0.439075	0.752427	16.9844	0.462096	0.857649
ACLY_HUMAN	P53396	ATP-citrate synthase	ACLY	ACLY_HUMAN|P53396_K1077	G-6599_DMSO_30min	-0.345106	0.242271	-1.42446	18.8264	0.170679	0.699019
ACLY_HUMAN	P53396-2	ATP-citrate synthase (isoform 2)	ACLY	ACLY_HUMAN|P53396-2_K471	G-6599_DMSO_30min	-0.130152	0.243844	-0.533751	18.7908	0.599772	0.90676
ACPH_HUMAN	P13798	Acylamino-acid-releasing enzyme	APEH	ACPH_HUMAN|P13798_K131	G-6599_DMSO_30min	-0.0934527	0.261177	-0.357814	22.0708	0.723882	0.94683
ACSA_HUMAN	Q9NR19	Acetyl-coenzyme A synthetase, cytoplasmic	ACSS2	ACSA_HUMAN|Q9NR19_K426	G-6599_DMSO_30min	-0.337376	0.293896	-1.14795	19.64	0.264782	0.765839
ACSL1_HUMAN	P33121	Long-chain-fatty-acid--CoA ligase 1	ACSL1	ACSL1_HUMAN|P33121_K207	G-6599_DMSO_30min	0.126346	0.389071	0.324737	16.97	0.749349	0.953836
ACSL1_HUMAN	P33121	Long-chain-fatty-acid--CoA ligase 1	ACSL1	ACSL1_HUMAN|P33121_K356	G-6599_DMSO_30min	-0.411395	0.318714	-1.2908	17.3437	0.213716	0.730294
ACSL3_HUMAN	O95573	Long-chain-fatty-acid--CoA ligase 3	ACSL3	ACSL3_HUMAN|O95573_K596	G-6599_DMSO_30min	-0.26141	0.653015	-0.400313	16.8323	0.693961	0.938143
ACSL4_HUMAN	O60488	Long-chain-fatty-acid--CoA ligase 4	ACSL4	ACSL4_HUMAN|O60488_K388	G-6599_DMSO_30min	0.103487	0.283704	0.364769	21.0404	0.718924	0.945415
ACSL4_HUMAN	O60488	Long-chain-fatty-acid--CoA ligase 4	ACSL4	ACSL4_HUMAN|O60488_K354	G-6599_DMSO_30min	-0.0444411	0.274086	-0.162143	21.4191	0.872713	0.980322
ACSL4_HUMAN	O60488	Long-chain-fatty-acid--CoA ligase 4	ACSL4	ACSL4_HUMAN|O60488_K401	G-6599_DMSO_30min	-0.248997	0.2496	-0.997583	22.6082	0.32904	0.802715
ACSL4_HUMAN	O60488	Long-chain-fatty-acid--CoA ligase 4	ACSL4	ACSL4_HUMAN|O60488_K231	G-6599_DMSO_30min	0.536686	0.360813	1.48744	19.0865	0.153235	0.684464
ACSL4_HUMAN	O60488	Long-chain-fatty-acid--CoA ligase 4	ACSL4	ACSL4_HUMAN|O60488_K593	G-6599_DMSO_30min	-0.0807278	0.270428	-0.298519	21.5749	0.768163	0.958718
ACSL4_HUMAN	O60488	Long-chain-fatty-acid--CoA ligase 4	ACSL4	ACSL4_HUMAN|O60488_K223	G-6599_DMSO_30min	-0.164447	0.286344	-0.5743	20.9437	0.571882	0.896191
ACSL4_HUMAN	O60488	Long-chain-fatty-acid--CoA ligase 4	ACSL4	ACSL4_HUMAN|O60488_K148	G-6599_DMSO_30min	0.0867154	0.286106	0.303088	20.9523	0.764811	0.957719
ACSL4_HUMAN	O60488	Long-chain-fatty-acid--CoA ligase 4	ACSL4	ACSL4_HUMAN|O60488_K89	G-6599_DMSO_30min	-0.0498132	0.266059	-0.187226	21.7701	0.853217	0.975872
ACSL4_HUMAN	O60488	Long-chain-fatty-acid--CoA ligase 4	ACSL4	ACSL4_HUMAN|O60488_K536	G-6599_DMSO_30min	-4.57e-05	0.332499	-0.00013757	19.635	0.999892	0.999892
ACSL4_HUMAN	O60488	Long-chain-fatty-acid--CoA ligase 4	ACSL4	ACSL4_HUMAN|O60488_K397	G-6599_DMSO_30min	-0.0200956	0.244479	-0.0821976	22.9067	0.935204	0.991061
ACSL4_HUMAN	O60488	Long-chain-fatty-acid--CoA ligase 4	ACSL4	ACSL4_HUMAN|O60488_K621	G-6599_DMSO_30min	-0.015318	0.274374	-0.055829	21.4071	0.955996	0.994127
ACSL4_HUMAN	O60488	Long-chain-fatty-acid--CoA ligase 4	ACSL4	ACSL4_HUMAN|O60488_K213	G-6599_DMSO_30min	0.0302435	0.248445	0.121731	22.6739	0.904184	0.988943
ACSL4_HUMAN	O60488	Long-chain-fatty-acid--CoA ligase 4	ACSL4	ACSL4_HUMAN|O60488_K498	G-6599_DMSO_30min	-0.148897	0.27997	-0.531834	21.1824	0.600375	0.907225
ACSL4_HUMAN	O60488	Long-chain-fatty-acid--CoA ligase 4	ACSL4	ACSL4_HUMAN|O60488_K413	G-6599_DMSO_30min	-0.148242	0.237381	-0.624491	23.3547	0.538359	0.886177
ACSL4_HUMAN	O60488	Long-chain-fatty-acid--CoA ligase 4	ACSL4	ACSL4_HUMAN|O60488_K532	G-6599_DMSO_30min	0.142373	0.349203	0.40771	19.294	0.687975	0.93739
ACTA_HUMAN	P62736	Actin, aortic smooth muscle	ACTA2	ACTA_HUMAN|P62736_K52	G-6599_DMSO_30min	-0.00299029	0.526286	-0.00568188	16.76	0.995534	0.999011
ACTA_HUMAN	P62736	Actin, aortic smooth muscle	ACTA2	ACTA_HUMAN|P62736_K328	G-6599_DMSO_30min	-0.360272	0.257228	-1.40059	18.553	0.177839	0.702264
ACTA_HUMAN	P62736	Actin, aortic smooth muscle	ACTA2	ACTA_HUMAN|P62736_K63	G-6599_DMSO_30min	-0.354627	0.370816	-0.956342	17.3131	0.352064	0.813565
ACTA_HUMAN	P62736	Actin, aortic smooth muscle	ACTA2	ACTA_HUMAN|P62736_K317	G-6599_DMSO_30min	-0.106329	0.243667	-0.436371	18.8363	0.667528	0.929231
ACTN1_HUMAN	P12814	Alpha-actinin-1	ACTN1	ACTN1_HUMAN|P12814_K103	G-6599_DMSO_30min	-0.123032	0.243697	-0.504855	23.8434	0.618295	0.91255
ACTN1_HUMAN	P12814	Alpha-actinin-1	ACTN1	ACTN1_HUMAN|P12814_K331	G-6599_DMSO_30min	0.261151	0.505656	0.516459	17.8083	0.611888	0.909948
ACTN1_HUMAN	P12814	Alpha-actinin-1	ACTN1	ACTN1_HUMAN|P12814_K402	G-6599_DMSO_30min	-0.0332102	0.273747	-0.121317	22.1222	0.904535	0.988943
ACTN1_HUMAN	P12814	Alpha-actinin-1	ACTN1	ACTN1_HUMAN|P12814_K633	G-6599_DMSO_30min	-0.121276	0.282251	-0.429673	21.7379	0.671663	0.931008
ACTN1_HUMAN	P12814	Alpha-actinin-1	ACTN1	ACTN1_HUMAN|P12814_K198	G-6599_DMSO_30min	0.126153	0.558979	0.225684	17.5116	0.82406	0.968357
ACTN4_HUMAN	O43707	Alpha-actinin-4	ACTN4	ACTN4_HUMAN|O43707_K853	G-6599_DMSO_30min	0.0718431	0.311089	0.230941	19.3289	0.819788	0.967371
ACTN4_HUMAN	O43707	Alpha-actinin-4	ACTN4	ACTN4_HUMAN|O43707_K114	G-6599_DMSO_30min	0.0817806	0.310016	0.263795	19.352	0.794727	0.964
ACTN4_HUMAN	O43707	Alpha-actinin-4	ACTN4	ACTN4_HUMAN|O43707_K592	G-6599_DMSO_30min	-0.372638	0.295063	-1.26291	19.703	0.221363	0.734728
ACVR1_HUMAN	Q04771	Activin receptor type-1	ACVR1	ACVR1_HUMAN|Q04771_K497	G-6599_DMSO_30min	-0.20985	0.306772	-0.684056	19.6703	0.50192	0.873394
ACVR1_HUMAN	Q04771	Activin receptor type-1	ACVR1	ACVR1_HUMAN|Q04771_K216	G-6599_DMSO_30min	0.0283168	0.315095	0.0898674	19.4773	0.92931	0.991061
ACY1_HUMAN	Q03154	Aminoacylase-1	ACY1	ACY1_HUMAN|Q03154_K218	G-6599_DMSO_30min	0.060652	0.372888	0.162655	17.3684	0.872668	0.980322
ACYP1_HUMAN	P07311	Acylphosphatase-1	ACYP1	ACYP1_HUMAN|P07311_K58	G-6599_DMSO_30min	0.0417105	0.333469	0.125081	29.4221	0.90131	0.988612
ACYP1_HUMAN	P07311	Acylphosphatase-1	ACYP1	ACYP1_HUMAN|P07311_K89_K99	G-6599_DMSO_30min	-0.454604	0.450407	-1.00932	23.3372	0.323173	0.799542
ADA10_HUMAN	O14672	Disintegrin and metalloproteinase domain-containing protein 10	ADAM10	ADA10_HUMAN|O14672_K714	G-6599_DMSO_30min	0.122039	0.30944	0.394386	21.6352	0.697157	0.938454
ADA17_HUMAN	P78536	Disintegrin and metalloproteinase domain-containing protein 17	ADAM17	ADA17_HUMAN|P78536_K367	G-6599_DMSO_30min	-0.2173	0.369641	-0.587866	17.9488	0.563946	0.893603
ADA17_HUMAN	P78536	Disintegrin and metalloproteinase domain-containing protein 17	ADAM17	ADA17_HUMAN|P78536_K226	G-6599_DMSO_30min	-0.373097	0.245501	-1.51974	20.345	0.143966	0.676322
ADA17_HUMAN	P78536	Disintegrin and metalloproteinase domain-containing protein 17	ADAM17	ADA17_HUMAN|P78536_K805	G-6599_DMSO_30min	-0.161328	0.29043	-0.555478	19.0924	0.585019	0.903488
ADA17_HUMAN	P78536	Disintegrin and metalloproteinase domain-containing protein 17	ADAM17	ADA17_HUMAN|P78536_K460	G-6599_DMSO_30min	-0.474123	0.280635	-1.68946	19.3109	0.107212	0.645285
ADA17_HUMAN	P78536	Disintegrin and metalloproteinase domain-containing protein 17	ADAM17	ADA17_HUMAN|P78536_K753	G-6599_DMSO_30min	0.286725	0.243928	1.17545	20.4031	0.25335	0.75902
ADAM9_HUMAN	Q13443	Disintegrin and metalloproteinase domain-containing protein 9	ADAM9	ADAM9_HUMAN|Q13443_K781	G-6599_DMSO_30min	-0.499985	0.284702	-1.75617	18.8886	0.095261	0.636141
ADAM9_HUMAN	Q13443	Disintegrin and metalloproteinase domain-containing protein 9	ADAM9	ADAM9_HUMAN|Q13443_K741	G-6599_DMSO_30min	-0.243739	0.270007	-0.902713	19.2076	0.37786	0.823239
ADCY3_HUMAN	O60266	Adenylate cyclase type 3	ADCY3	ADCY3_HUMAN|O60266_K908	G-6599_DMSO_30min	0.160377	0.352451	0.455033	17.4864	0.654684	0.925952
ADCY3_HUMAN	O60266	Adenylate cyclase type 3	ADCY3	ADCY3_HUMAN|O60266_K428	G-6599_DMSO_30min	-0.247787	0.261517	-0.947496	18.5757	0.35555	0.815008
ADCY3_HUMAN	O60266	Adenylate cyclase type 3	ADCY3	ADCY3_HUMAN|O60266_K1046	G-6599_DMSO_30min	-0.345656	0.343271	-1.00695	17.557	0.327636	0.802247
ADCY6_HUMAN	O43306	Adenylate cyclase type 6	ADCY6	ADCY6_HUMAN|O43306_K1154	G-6599_DMSO_30min	-0.21213	0.29356	-0.722613	23.5827	0.477023	0.863652
ADCY9_HUMAN	O60503	Adenylate cyclase type 9	ADCY9	ADCY9_HUMAN|O60503_K622	G-6599_DMSO_30min	-0.300935	0.28622	-1.05141	24.2379	0.303441	0.793256
ADCY9_HUMAN	O60503	Adenylate cyclase type 9	ADCY9	ADCY9_HUMAN|O60503_K564	G-6599_DMSO_30min	-0.32653	0.289176	-1.12917	24.0599	0.269959	0.769683
ADHX_HUMAN	P11766	Alcohol dehydrogenase class-3	ADH5	ADHX_HUMAN|P11766_K315	G-6599_DMSO_30min	-0.277152	0.255175	-1.08612	19.0958	0.290946	0.785673
ADK_HUMAN	P55263	Adenosine kinase	ADK	ADK_HUMAN|P55263_K51	G-6599_DMSO_30min	0.37198	0.619895	0.600069	16.71	0.556511	0.891119
ADK_HUMAN	P55263	Adenosine kinase	ADK	ADK_HUMAN|P55263_K162	G-6599_DMSO_30min	0.188536	0.263505	0.715493	19.047	0.482984	0.866642
ADNP_HUMAN	Q9H2P0	Activity-dependent neuroprotector homeobox protein	ADNP	ADNP_HUMAN|Q9H2P0_K616	G-6599_DMSO_30min	-0.801329	0.272997	-2.9353	18.806	0.00855742	0.462987
ADNP_HUMAN	Q9H2P0	Activity-dependent neuroprotector homeobox protein	ADNP	ADNP_HUMAN|Q9H2P0_K716	G-6599_DMSO_30min	-0.960409	0.306638	-3.13206	18.2442	0.00569057	0.450929
ADNP2_HUMAN	Q6IQ32	ADNP homeobox protein 2	ADNP2	ADNP2_HUMAN|Q6IQ32_K1059	G-6599_DMSO_30min	-0.369019	0.245543	-1.50286	21.0323	0.147741	0.677931
ADPPT_HUMAN	Q9NRN7	L-aminoadipate-semialdehyde dehydrogenase-phosphopantetheinyl transferase	AASDHPPT	ADPPT_HUMAN|Q9NRN7_K214	G-6599_DMSO_30min	-0.0908212	0.612871	-0.14819	17.1628	0.88392	0.983654
ADPPT_HUMAN	Q9NRN7	L-aminoadipate-semialdehyde dehydrogenase-phosphopantetheinyl transferase	AASDHPPT	ADPPT_HUMAN|Q9NRN7_K149	G-6599_DMSO_30min	-0.351615	0.279474	-1.25813	21.1391	0.222063	0.735302
ADPPT_HUMAN	Q9NRN7	L-aminoadipate-semialdehyde dehydrogenase-phosphopantetheinyl transferase	AASDHPPT	ADPPT_HUMAN|Q9NRN7_K263	G-6599_DMSO_30min	0.444273	0.750908	0.591647	16.8462	0.561943	0.893163
ADRM1_HUMAN	Q16186	Proteasomal ubiquitin receptor ADRM1	ADRM1	ADRM1_HUMAN|Q16186_K386	G-6599_DMSO_30min	-0.445648	0.259246	-1.71901	19.9151	0.101118	0.64027
ADRM1_HUMAN	Q16186	Proteasomal ubiquitin receptor ADRM1	ADRM1	ADRM1_HUMAN|Q16186_K34_K42	G-6599_DMSO_30min	-0.480114	0.207966	-2.30862	22.2018	0.0306494	0.545928
ADRM1_HUMAN	Q16186	Proteasomal ubiquitin receptor ADRM1	ADRM1	ADRM1_HUMAN|Q16186_K42	G-6599_DMSO_30min	-0.4482	0.222253	-2.01662	21.3884	0.0564635	0.590169
ADRM1_HUMAN	Q16186	Proteasomal ubiquitin receptor ADRM1	ADRM1	ADRM1_HUMAN|Q16186_K83	G-6599_DMSO_30min	0.00142488	0.27371	0.00520581	19.5071	0.995899	0.999269
ADRM1_HUMAN	Q16186	Proteasomal ubiquitin receptor ADRM1	ADRM1	ADRM1_HUMAN|Q16186_K62	G-6599_DMSO_30min	-0.198615	0.515036	-0.385634	17.1024	0.704522	0.941548
ADRM1_HUMAN	Q16186	Proteasomal ubiquitin receptor ADRM1	ADRM1	ADRM1_HUMAN|Q16186_K34	G-6599_DMSO_30min	-0.313431	0.229711	-1.36446	21.0276	0.186849	0.706959
ADT2_HUMAN	P05141	ADP/ATP translocase 2	SLC25A5	ADT2_HUMAN|P05141_K49	G-6599_DMSO_30min	0.408148	0.269893	1.51226	25.2935	0.142864	0.67505
AEN_HUMAN	Q8WTP8	Apoptosis-enhancing nuclease	AEN	AEN_HUMAN|Q8WTP8_K235	G-6599_DMSO_30min	-0.202345	0.256287	-0.789525	23.7031	0.437633	0.846182
AFAP1_HUMAN	Q8N556	Actin filament-associated protein 1	AFAP1	AFAP1_HUMAN|Q8N556_K42	G-6599_DMSO_30min	-0.36866	0.305759	-1.20572	18.9054	0.2428	0.752589
AFF4_HUMAN	Q9UHB7	AF4/FMR2 family member 4	AFF4	AFF4_HUMAN|Q9UHB7_K344	G-6599_DMSO_30min	-1.22201	0.363082	-3.36567	17.1424	0.00363608	0.358819
AFF4_HUMAN	Q9UHB7	AF4/FMR2 family member 4	AFF4	AFF4_HUMAN|Q9UHB7_K297	G-6599_DMSO_30min	-0.601398	0.859768	-0.699488	16.3903	0.494055	0.870304
AGAL_HUMAN	P06280	Alpha-galactosidase A	GLA	AGAL_HUMAN|P06280_K127	G-6599_DMSO_30min	-0.517452	0.308435	-1.67767	31.6099	0.103274	0.645285
AGAP1_HUMAN	Q9UPQ3	Arf-GAP with GTPase, ANK repeat and PH domain-containing protein 1	AGAP1	AGAP1_HUMAN|Q9UPQ3_K84	G-6599_DMSO_30min	-0.235707	0.263081	-0.89595	19.4364	0.381242	0.824357
AGFG1_HUMAN	P52594	Arf-GAP domain and FG repeat-containing protein 1	AGFG1	AGFG1_HUMAN|P52594_K194	G-6599_DMSO_30min	-0.737903	0.336582	-2.19234	18.8209	0.0411343	0.553837
AGM1_HUMAN	O95394	Phosphoacetylglucosamine mutase	PGM3	AGM1_HUMAN|O95394_K196	G-6599_DMSO_30min	-0.269273	0.33138	-0.812581	17.8836	0.427144	0.840035
AGM1_HUMAN	O95394	Phosphoacetylglucosamine mutase	PGM3	AGM1_HUMAN|O95394_K177	G-6599_DMSO_30min	-0.582552	0.294395	-1.97881	18.3499	0.0630453	0.595573
AGRG6_HUMAN	Q86SQ4	NA	NA	AGRG6_HUMAN|Q86SQ4_K1144	G-6599_DMSO_30min	0.0181179	0.297674	0.0608651	19.2845	0.952093	0.993827
AGRG6_HUMAN	Q86SQ4	NA	NA	AGRG6_HUMAN|Q86SQ4_K1151	G-6599_DMSO_30min	-0.492744	0.29366	-1.67794	19.375	0.109417	0.649715
AGRG6_HUMAN	Q86SQ4	NA	NA	AGRG6_HUMAN|Q86SQ4_K1159	G-6599_DMSO_30min	0.344101	0.404067	0.851594	17.8307	0.405732	0.828561
AGRG6_HUMAN	Q86SQ4	NA	NA	AGRG6_HUMAN|Q86SQ4_K1178	G-6599_DMSO_30min	-0.360589	0.295685	-1.2195	19.3288	0.237326	0.748115
AGRG6_HUMAN	Q86SQ4	NA	NA	AGRG6_HUMAN|Q86SQ4_K1152	G-6599_DMSO_30min	-0.321504	0.264795	-1.21416	20.1636	0.238715	0.748838
AHNK_HUMAN	Q09666	Neuroblast differentiation-associated protein AHNAK	AHNAK	AHNK_HUMAN|Q09666_K4831	G-6599_DMSO_30min	-0.0424122	0.294655	-0.143938	19.1961	0.887049	0.984397
AHNK_HUMAN	Q09666	Neuroblast differentiation-associated protein AHNAK	AHNAK	AHNK_HUMAN|Q09666_K1194	G-6599_DMSO_30min	0.130077	0.359262	0.362068	18.1774	0.721477	0.94659
AHNK_HUMAN	Q09666	Neuroblast differentiation-associated protein AHNAK	AHNAK	AHNK_HUMAN|Q09666_K4751	G-6599_DMSO_30min	-0.309142	0.256477	-1.20534	20.2329	0.241981	0.752211
AHNK_HUMAN	Q09666	Neuroblast differentiation-associated protein AHNAK	AHNAK	AHNK_HUMAN|Q09666_K627	G-6599_DMSO_30min	0.422668	0.430102	0.982717	17.5677	0.339088	0.806466
AHNK_HUMAN	Q09666	Neuroblast differentiation-associated protein AHNAK	AHNAK	AHNK_HUMAN|Q09666_K3686	G-6599_DMSO_30min	-0.275896	0.321054	-0.859344	18.6997	0.401033	0.82578
AHNK_HUMAN	Q09666	Neuroblast differentiation-associated protein AHNAK	AHNAK	AHNK_HUMAN|Q09666_K519	G-6599_DMSO_30min	-0.104832	0.317094	-0.330602	18.7657	0.744608	0.953513
AHNK_HUMAN	Q09666	Neuroblast differentiation-associated protein AHNAK	AHNAK	AHNK_HUMAN|Q09666_K5181	G-6599_DMSO_30min	0.0279369	0.28257	0.0988672	19.4754	0.922254	0.991061
AHNK_HUMAN	Q09666	Neuroblast differentiation-associated protein AHNAK	AHNAK	AHNK_HUMAN|Q09666_K5381	G-6599_DMSO_30min	-0.101926	0.321124	-0.317404	18.6986	0.754454	0.954484
AHNK_HUMAN	Q09666	Neuroblast differentiation-associated protein AHNAK	AHNAK	AHNK_HUMAN|Q09666_K5144	G-6599_DMSO_30min	0.188518	0.587716	0.320764	16.9346	0.752314	0.953836
AHNK_HUMAN	Q09666	Neuroblast differentiation-associated protein AHNAK	AHNAK	AHNK_HUMAN|Q09666_K1461	G-6599_DMSO_30min	-0.308148	0.319923	-0.963197	18.7183	0.347728	0.810801
AHNK_HUMAN	Q09666	Neuroblast differentiation-associated protein AHNAK	AHNAK	AHNK_HUMAN|Q09666_K1488	G-6599_DMSO_30min	-0.212233	0.29957	-0.70846	19.0928	0.48722	0.868268
AHNK_HUMAN	Q09666	Neuroblast differentiation-associated protein AHNAK	AHNAK	AHNK_HUMAN|Q09666_K2589	G-6599_DMSO_30min	-0.368077	0.315321	-1.16731	18.7962	0.257682	0.759612
AHNK_HUMAN	Q09666	Neuroblast differentiation-associated protein AHNAK	AHNAK	AHNK_HUMAN|Q09666_K5103	G-6599_DMSO_30min	-0.0102695	0.270823	-0.0379197	19.7869	0.970132	0.996087
AHNK_HUMAN	Q09666	Neuroblast differentiation-associated protein AHNAK	AHNAK	AHNK_HUMAN|Q09666_K1077	G-6599_DMSO_30min	-0.112067	0.316248	-0.354363	18.7802	0.727014	0.947898
AHNK_HUMAN	Q09666	Neuroblast differentiation-associated protein AHNAK	AHNAK	AHNK_HUMAN|Q09666_K848	G-6599_DMSO_30min	0.113903	0.444519	0.256239	17.4794	0.800758	0.964581
AHNK_HUMAN	Q09666	Neuroblast differentiation-associated protein AHNAK	AHNAK	AHNK_HUMAN|Q09666_K4038	G-6599_DMSO_30min	-0.271741	0.300407	-0.904575	19.0758	0.376974	0.823239
AHNK_HUMAN	Q09666	Neuroblast differentiation-associated protein AHNAK	AHNAK	AHNK_HUMAN|Q09666_K748	G-6599_DMSO_30min	-0.00581602	0.407574	-0.0142698	17.7258	0.988774	0.997403
AHNK_HUMAN	Q09666	Neuroblast differentiation-associated protein AHNAK	AHNAK	AHNK_HUMAN|Q09666_K3201	G-6599_DMSO_30min	-0.338711	0.304583	-1.11205	18.993	0.279996	0.777794
AHNK_HUMAN	Q09666	Neuroblast differentiation-associated protein AHNAK	AHNAK	AHNK_HUMAN|Q09666_K756	G-6599_DMSO_30min	-0.0845912	0.299031	-0.282885	19.1039	0.780308	0.960314
AHNK_HUMAN	Q09666	Neuroblast differentiation-associated protein AHNAK	AHNAK	AHNK_HUMAN|Q09666_K1481	G-6599_DMSO_30min	0.049691	0.32635	0.152263	18.6154	0.880618	0.983654
AHNK_HUMAN	Q09666	Neuroblast differentiation-associated protein AHNAK	AHNAK	AHNK_HUMAN|Q09666_K5209	G-6599_DMSO_30min	0.26492	0.437854	0.605043	17.5191	0.552908	0.890543
AHNK_HUMAN	Q09666	Neuroblast differentiation-associated protein AHNAK	AHNAK	AHNK_HUMAN|Q09666_K1082	G-6599_DMSO_30min	-0.141292	0.305613	-0.462324	18.9731	0.649107	0.924622
AHNK_HUMAN	Q09666	Neuroblast differentiation-associated protein AHNAK	AHNAK	AHNK_HUMAN|Q09666_K5183	G-6599_DMSO_30min	-0.0807477	0.310171	-0.260333	18.8878	0.797424	0.964
AHNK_HUMAN	Q09666	Neuroblast differentiation-associated protein AHNAK	AHNAK	AHNK_HUMAN|Q09666_K5434	G-6599_DMSO_30min	-0.155035	0.293611	-0.52803	19.2187	0.603523	0.909292
AHNK_HUMAN	Q09666	Neuroblast differentiation-associated protein AHNAK	AHNAK	AHNK_HUMAN|Q09666_K252	G-6599_DMSO_30min	0.22398	0.450465	0.49722	17.4456	0.625242	0.915696
AHNK_HUMAN	Q09666	Neuroblast differentiation-associated protein AHNAK	AHNAK	AHNK_HUMAN|Q09666_K1268	G-6599_DMSO_30min	-0.338363	0.300025	-1.12778	19.0835	0.273392	0.773906
AHNK_HUMAN	Q09666	Neuroblast differentiation-associated protein AHNAK	AHNAK	AHNK_HUMAN|Q09666_K3734	G-6599_DMSO_30min	-0.222765	0.27743	-0.80296	19.6064	0.431624	0.843627
AHNK_HUMAN	Q09666	Neuroblast differentiation-associated protein AHNAK	AHNAK	AHNK_HUMAN|Q09666_K3106	G-6599_DMSO_30min	-0.12071	0.378694	-0.318754	17.9737	0.753587	0.954129
AHNK_HUMAN	Q09666	Neuroblast differentiation-associated protein AHNAK	AHNAK	AHNK_HUMAN|Q09666_K3741	G-6599_DMSO_30min	-0.370943	0.301626	-1.22981	19.0512	0.233739	0.744791
AHNK_HUMAN	Q09666	Neuroblast differentiation-associated protein AHNAK	AHNAK	AHNK_HUMAN|Q09666_K1509	G-6599_DMSO_30min	0.0231289	0.413834	0.0558893	17.6791	0.956057	0.994127
AHNK_HUMAN	Q09666	Neuroblast differentiation-associated protein AHNAK	AHNAK	AHNK_HUMAN|Q09666_K3256	G-6599_DMSO_30min	-0.38402	0.265428	-1.4468	19.9454	0.163487	0.69168
AHNK_HUMAN	Q09666	Neuroblast differentiation-associated protein AHNAK	AHNAK	AHNK_HUMAN|Q09666_K1205	G-6599_DMSO_30min	-0.293561	0.304235	-0.964917	18.9997	0.346708	0.810673
AHNK_HUMAN	Q09666	Neuroblast differentiation-associated protein AHNAK	AHNAK	AHNK_HUMAN|Q09666_K1818	G-6599_DMSO_30min	-0.165139	0.357319	-0.46216	18.1997	0.649444	0.924673
AHNK_HUMAN	Q09666	Neuroblast differentiation-associated protein AHNAK	AHNAK	AHNK_HUMAN|Q09666_K5240	G-6599_DMSO_30min	-0.0763897	0.288266	-0.264997	19.339	0.793815	0.964
AHNK_HUMAN	Q09666	Neuroblast differentiation-associated protein AHNAK	AHNAK	AHNK_HUMAN|Q09666_K1056	G-6599_DMSO_30min	-0.194395	0.279581	-0.695307	19.5506	0.495045	0.870307
AHNK_HUMAN	Q09666	Neuroblast differentiation-associated protein AHNAK	AHNAK	AHNK_HUMAN|Q09666_K1210	G-6599_DMSO_30min	0.0049479	0.348434	0.0142004	18.3069	0.988824	0.997403
AHNK_HUMAN	Q09666	Neuroblast differentiation-associated protein AHNAK	AHNAK	AHNK_HUMAN|Q09666_K2463	G-6599_DMSO_30min	-0.0783765	0.316117	-0.247935	18.7825	0.806875	0.965351
AHNK_HUMAN	Q09666	Neuroblast differentiation-associated protein AHNAK	AHNAK	AHNK_HUMAN|Q09666_K3601	G-6599_DMSO_30min	-0.100837	0.393005	-0.256578	17.8436	0.800439	0.964581
AHNK_HUMAN	Q09666	Neuroblast differentiation-associated protein AHNAK	AHNAK	AHNK_HUMAN|Q09666_K3681	G-6599_DMSO_30min	-0.167309	0.324106	-0.516216	18.6506	0.61177	0.909948
AHNK_HUMAN	Q09666	Neuroblast differentiation-associated protein AHNAK	AHNAK	AHNK_HUMAN|Q09666_K2561	G-6599_DMSO_30min	-0.107761	0.362806	-0.297022	18.1376	0.769825	0.959236
AHNK_HUMAN	Q09666	Neuroblast differentiation-associated protein AHNAK	AHNAK	AHNK_HUMAN|Q09666_K5355	G-6599_DMSO_30min	-0.188302	0.353967	-0.531978	18.2392	0.601162	0.907769
AHNK_HUMAN	Q09666	Neuroblast differentiation-associated protein AHNAK	AHNAK	AHNK_HUMAN|Q09666_K891	G-6599_DMSO_30min	-0.0848774	0.332138	-0.255548	18.5281	0.801115	0.964581
AHNK_HUMAN	Q09666	Neuroblast differentiation-associated protein AHNAK	AHNAK	AHNK_HUMAN|Q09666_K3931	G-6599_DMSO_30min	-0.426792	0.317038	-1.34619	18.7667	0.194279	0.713378
AHNK_HUMAN	Q09666	Neuroblast differentiation-associated protein AHNAK	AHNAK	AHNK_HUMAN|Q09666_K1012	G-6599_DMSO_30min	-0.144695	0.31936	-0.453077	18.7276	0.655699	0.926309
AHNK_HUMAN	Q09666	Neuroblast differentiation-associated protein AHNAK	AHNAK	AHNK_HUMAN|Q09666_K1208	G-6599_DMSO_30min	-0.194372	0.333541	-0.582753	18.5077	0.567093	0.894284
AHNK_HUMAN	Q09666	Neuroblast differentiation-associated protein AHNAK	AHNAK	AHNK_HUMAN|Q09666_K1594	G-6599_DMSO_30min	-0.115708	0.330325	-0.350285	18.555	0.73007	0.94906
AHNK_HUMAN	Q09666	Neuroblast differentiation-associated protein AHNAK	AHNAK	AHNK_HUMAN|Q09666_K4118	G-6599_DMSO_30min	-0.316515	0.280905	-1.12677	19.517	0.273503	0.773906
AHNK_HUMAN	Q09666	Neuroblast differentiation-associated protein AHNAK	AHNAK	AHNK_HUMAN|Q09666_K5858	G-6599_DMSO_30min	-0.569063	0.28517	-1.99552	19.412	0.0602126	0.595573
AHNK_HUMAN	Q09666	Neuroblast differentiation-associated protein AHNAK	AHNAK	AHNK_HUMAN|Q09666_K1111	G-6599_DMSO_30min	0.103951	0.356003	0.291995	18.215	0.77359	0.959236
AHNK_HUMAN	Q09666	Neuroblast differentiation-associated protein AHNAK	AHNAK	AHNK_HUMAN|Q09666_K2993	G-6599_DMSO_30min	-0.129397	0.321078	-0.403007	18.6993	0.691514	0.938143
AHNK_HUMAN	Q09666	Neuroblast differentiation-associated protein AHNAK	AHNAK	AHNK_HUMAN|Q09666_K707	G-6599_DMSO_30min	-0.275213	0.317877	-0.865785	18.7525	0.39755	0.824993
AHNK_HUMAN	Q09666	Neuroblast differentiation-associated protein AHNAK	AHNAK	AHNK_HUMAN|Q09666_K3036	G-6599_DMSO_30min	-0.0266742	0.326246	-0.081761	18.617	0.935709	0.991061
AHNK_HUMAN	Q09666	Neuroblast differentiation-associated protein AHNAK	AHNAK	AHNK_HUMAN|Q09666_K2578	G-6599_DMSO_30min	-0.115761	0.329014	-0.351843	18.5746	0.728916	0.94823
AHNK_HUMAN	Q09666	Neuroblast differentiation-associated protein AHNAK	AHNAK	AHNK_HUMAN|Q09666_K727	G-6599_DMSO_30min	-0.124253	0.277819	-0.447243	19.5962	0.659604	0.927279
AHNK_HUMAN	Q09666	Neuroblast differentiation-associated protein AHNAK	AHNAK	AHNK_HUMAN|Q09666_K134	G-6599_DMSO_30min	0.107855	0.326776	0.330059	18.6088	0.745042	0.953513
AHNK_HUMAN	Q09666	Neuroblast differentiation-associated protein AHNAK	AHNAK	AHNK_HUMAN|Q09666_K1191	G-6599_DMSO_30min	-0.330865	0.26533	-1.247	19.9484	0.226842	0.737384
AHNK_HUMAN	Q09666	Neuroblast differentiation-associated protein AHNAK	AHNAK	AHNK_HUMAN|Q09666_K4534	G-6599_DMSO_30min	-0.433571	0.406092	-1.06767	17.7372	0.299987	0.79079
AHNK_HUMAN	Q09666	Neuroblast differentiation-associated protein AHNAK	AHNAK	AHNK_HUMAN|Q09666_K181	G-6599_DMSO_30min	0.0518766	0.31311	0.165682	18.8349	0.870173	0.97997
AHNK_HUMAN	Q09666	Neuroblast differentiation-associated protein AHNAK	AHNAK	AHNK_HUMAN|Q09666_K3308	G-6599_DMSO_30min	-0.162148	0.287487	-0.564019	19.3571	0.579218	0.900209
AHNK_HUMAN	Q09666	Neuroblast differentiation-associated protein AHNAK	AHNAK	AHNK_HUMAN|Q09666_K3323	G-6599_DMSO_30min	-0.280594	0.31065	-0.903248	18.8791	0.377775	0.823239
AHNK_HUMAN	Q09666	Neuroblast differentiation-associated protein AHNAK	AHNAK	AHNK_HUMAN|Q09666_K4859	G-6599_DMSO_30min	-0.0886531	0.321771	-0.275516	18.688	0.785943	0.962414
AHNK_HUMAN	Q09666	Neuroblast differentiation-associated protein AHNAK	AHNAK	AHNK_HUMAN|Q09666_K4879	G-6599_DMSO_30min	-0.0298596	0.330008	-0.0904816	18.5597	0.928874	0.991061
AHNK_HUMAN	Q09666	Neuroblast differentiation-associated protein AHNAK	AHNAK	AHNK_HUMAN|Q09666_K2132	G-6599_DMSO_30min	-0.114707	0.403646	-0.284177	17.7562	0.779562	0.960039
AHNK_HUMAN	Q09666	Neuroblast differentiation-associated protein AHNAK	AHNAK	AHNK_HUMAN|Q09666_K884	G-6599_DMSO_30min	-0.297277	0.288889	-1.02904	19.3246	0.316171	0.796127
AHNK_HUMAN	Q09666	Neuroblast differentiation-associated protein AHNAK	AHNAK	AHNK_HUMAN|Q09666_K5346	G-6599_DMSO_30min	-0.0563383	0.33962	-0.165886	18.4224	0.870053	0.97997
AHNK_HUMAN	Q09666	Neuroblast differentiation-associated protein AHNAK	AHNAK	AHNK_HUMAN|Q09666_K1711	G-6599_DMSO_30min	0.0756341	0.376536	0.200868	17.9947	0.843055	0.973791
AHNK_HUMAN	Q09666	Neuroblast differentiation-associated protein AHNAK	AHNAK	AHNK_HUMAN|Q09666_K1791	G-6599_DMSO_30min	-0.307529	0.331809	-0.926826	18.533	0.36593	0.819217
AHNK_HUMAN	Q09666	Neuroblast differentiation-associated protein AHNAK	AHNAK	AHNK_HUMAN|Q09666_K4736	G-6599_DMSO_30min	0.0211589	0.37581	0.0563022	18.0018	0.955721	0.994127
AHNK_HUMAN	Q09666	Neuroblast differentiation-associated protein AHNAK	AHNAK	AHNK_HUMAN|Q09666_K1561	G-6599_DMSO_30min	0.0203128	0.402659	0.0504466	17.764	0.960329	0.994356
AHNK_HUMAN	Q09666	Neuroblast differentiation-associated protein AHNAK	AHNAK	AHNK_HUMAN|Q09666_K800	G-6599_DMSO_30min	-0.0183664	0.433427	-0.0423749	17.5465	0.966678	0.995716
AHNK_HUMAN	Q09666	Neuroblast differentiation-associated protein AHNAK	AHNAK	AHNK_HUMAN|Q09666_K4111	G-6599_DMSO_30min	-0.269873	0.34667	-0.778471	18.3293	0.446225	0.852312
AHNK_HUMAN	Q09666	Neuroblast differentiation-associated protein AHNAK	AHNAK	AHNK_HUMAN|Q09666_K4845	G-6599_DMSO_30min	-0.340495	0.266376	-1.27825	19.9168	0.215858	0.73174
AHNK_HUMAN	Q09666	Neuroblast differentiation-associated protein AHNAK	AHNAK	AHNK_HUMAN|Q09666_K1396	G-6599_DMSO_30min	0.0870666	0.306093	0.284445	18.964	0.779152	0.959808
AHNK_HUMAN	Q09666	Neuroblast differentiation-associated protein AHNAK	AHNAK	AHNK_HUMAN|Q09666_K2435	G-6599_DMSO_30min	-0.10883	0.321323	-0.338694	18.6953	0.738614	0.951555
AHNK_HUMAN	Q09666	Neuroblast differentiation-associated protein AHNAK	AHNAK	AHNK_HUMAN|Q09666_K5087	G-6599_DMSO_30min	0.54483	0.929597	0.586093	16.5089	0.565741	0.894028
AHNK_HUMAN	Q09666	Neuroblast differentiation-associated protein AHNAK	AHNAK	AHNK_HUMAN|Q09666_K1405	G-6599_DMSO_30min	0.025373	0.272569	0.0930882	19.7378	0.926772	0.991061
AHNK_HUMAN	Q09666	Neuroblast differentiation-associated protein AHNAK	AHNAK	AHNK_HUMAN|Q09666_K5098	G-6599_DMSO_30min	-0.0492523	0.392166	-0.125591	17.8508	0.90146	0.988612
AHNK_HUMAN	Q09666	Neuroblast differentiation-associated protein AHNAK	AHNAK	AHNK_HUMAN|Q09666_K5307	G-6599_DMSO_30min	-0.439145	0.274442	-1.60014	19.6863	0.125494	0.665478
AHNK_HUMAN	Q09666	Neuroblast differentiation-associated protein AHNAK	AHNAK	AHNK_HUMAN|Q09666_K4501	G-6599_DMSO_30min	-0.150969	0.335957	-0.449368	18.4732	0.658394	0.926934
AHNK_HUMAN	Q09666	Neuroblast differentiation-associated protein AHNAK	AHNAK	AHNK_HUMAN|Q09666_K1524	G-6599_DMSO_30min	0.0189582	0.355224	0.0533697	18.2242	0.958018	0.994174
AHNK_HUMAN	Q09666	Neuroblast differentiation-associated protein AHNAK	AHNAK	AHNK_HUMAN|Q09666_K2609	G-6599_DMSO_30min	-0.159483	0.28276	-0.564021	19.4707	0.579179	0.900209
AHNK_HUMAN	Q09666	Neuroblast differentiation-associated protein AHNAK	AHNAK	AHNK_HUMAN|Q09666_K1796	G-6599_DMSO_30min	0.118131	0.459519	0.257076	17.3966	0.800136	0.964581
AHNK_HUMAN	Q09666	Neuroblast differentiation-associated protein AHNAK	AHNAK	AHNK_HUMAN|Q09666_K942	G-6599_DMSO_30min	-0.408597	0.283941	-1.43902	19.4417	0.166051	0.692793
AHNK_HUMAN	Q09666	Neuroblast differentiation-associated protein AHNAK	AHNAK	AHNK_HUMAN|Q09666_K1107	G-6599_DMSO_30min	-0.0963387	0.267595	-0.360016	19.8805	0.722631	0.946728
AHNK_HUMAN	Q09666	Neuroblast differentiation-associated protein AHNAK	AHNAK	AHNK_HUMAN|Q09666_K530	G-6599_DMSO_30min	-0.256118	0.263092	-0.97349	20.0173	0.341928	0.806466
AHNK_HUMAN	Q09666	Neuroblast differentiation-associated protein AHNAK	AHNAK	AHNK_HUMAN|Q09666_K5281	G-6599_DMSO_30min	-0.0456015	0.307358	-0.148366	18.94	0.883622	0.983654
AHNK_HUMAN	Q09666	Neuroblast differentiation-associated protein AHNAK	AHNAK	AHNK_HUMAN|Q09666_K1177	G-6599_DMSO_30min	-0.0053472	0.298906	-0.0178892	19.1064	0.985913	0.997403
AHNK_HUMAN	Q09666	Neuroblast differentiation-associated protein AHNAK	AHNAK	AHNK_HUMAN|Q09666_K4529	G-6599_DMSO_30min	-0.150273	0.319588	-0.47021	18.7239	0.643635	0.922152
AHNK_HUMAN	Q09666	Neuroblast differentiation-associated protein AHNAK	AHNAK	AHNK_HUMAN|Q09666_K1333	G-6599_DMSO_30min	-0.137505	0.305125	-0.450652	18.9825	0.657345	0.926309
AHNK_HUMAN	Q09666	Neuroblast differentiation-associated protein AHNAK	AHNAK	AHNK_HUMAN|Q09666_K1049	G-6599_DMSO_30min	-0.217477	0.317851	-0.684209	18.7529	0.502211	0.873394
AHNK_HUMAN	Q09666	Neuroblast differentiation-associated protein AHNAK	AHNAK	AHNK_HUMAN|Q09666_K1232	G-6599_DMSO_30min	-0.0396707	0.290401	-0.136607	19.2901	0.892757	0.986333
AHNK_HUMAN	Q09666	Neuroblast differentiation-associated protein AHNAK	AHNAK	AHNK_HUMAN|Q09666_K4864	G-6599_DMSO_30min	0.0974452	0.349613	0.278723	18.2922	0.783584	0.961934
AHNK_HUMAN	Q09666	Neuroblast differentiation-associated protein AHNAK	AHNAK	AHNK_HUMAN|Q09666_K4139	G-6599_DMSO_30min	-0.24973	0.328971	-0.759126	18.5753	0.457303	0.854558
AHNK_HUMAN	Q09666	Neuroblast differentiation-associated protein AHNAK	AHNAK	AHNK_HUMAN|Q09666_K2978	G-6599_DMSO_30min	-0.118021	0.40832	-0.28904	17.7201	0.775905	0.959521
AHNK_HUMAN	Q09666	Neuroblast differentiation-associated protein AHNAK	AHNAK	AHNK_HUMAN|Q09666_K5312	G-6599_DMSO_30min	-0.193553	0.296797	-0.652137	19.1504	0.522064	0.884199
AHNK_HUMAN	Q09666	Neuroblast differentiation-associated protein AHNAK	AHNAK	AHNK_HUMAN|Q09666_K763	G-6599_DMSO_30min	-0.00896706	0.305576	-0.0293448	18.9738	0.976896	0.997104
AHNK_HUMAN	Q09666	Neuroblast differentiation-associated protein AHNAK	AHNAK	AHNK_HUMAN|Q09666_K1363	G-6599_DMSO_30min	0.284585	0.600171	0.474172	16.9051	0.641444	0.922083
AHNK_HUMAN	Q09666	Neuroblast differentiation-associated protein AHNAK	AHNAK	AHNK_HUMAN|Q09666_K5443	G-6599_DMSO_30min	-0.193958	0.281209	-0.689731	19.5093	0.498487	0.871731
AHNK_HUMAN	Q09666	Neuroblast differentiation-associated protein AHNAK	AHNAK	AHNK_HUMAN|Q09666_K5831	G-6599_DMSO_30min	-0.519071	0.269671	-1.92483	19.8199	0.0687249	0.596256
AHNK_HUMAN	Q09666	Neuroblast differentiation-associated protein AHNAK	AHNAK	AHNK_HUMAN|Q09666_K1589	G-6599_DMSO_30min	-0.238372	0.308798	-0.771935	18.9131	0.449691	0.853715
AHNK_HUMAN	Q09666	Neuroblast differentiation-associated protein AHNAK	AHNAK	AHNK_HUMAN|Q09666_K2616	G-6599_DMSO_30min	-0.271242	0.310131	-0.874604	18.8886	0.392774	0.824931
AHNK_HUMAN	Q09666	Neuroblast differentiation-associated protein AHNAK	AHNAK	AHNK_HUMAN|Q09666_K2717	G-6599_DMSO_30min	-0.176047	0.326039	-0.539956	18.6202	0.595627	0.905892
AHNK_HUMAN	Q09666	Neuroblast differentiation-associated protein AHNAK	AHNAK	AHNK_HUMAN|Q09666_K4125	G-6599_DMSO_30min	-0.399936	0.294409	-1.35844	19.2014	0.190072	0.706959
AHNK_HUMAN	Q09666	Neuroblast differentiation-associated protein AHNAK	AHNAK	AHNK_HUMAN|Q09666_K1911	G-6599_DMSO_30min	-0.230059	0.35085	-0.655718	18.2769	0.520175	0.884199
AHNK_HUMAN	Q09666	Neuroblast differentiation-associated protein AHNAK	AHNAK	AHNK_HUMAN|Q09666_K2104	G-6599_DMSO_30min	-0.328874	0.313789	-1.04807	18.823	0.307877	0.793403
AHNK_HUMAN	Q09666	Neuroblast differentiation-associated protein AHNAK	AHNAK	AHNK_HUMAN|Q09666_K4926	G-6599_DMSO_30min	-0.217905	0.292429	-0.745154	19.2447	0.465182	0.858835
AHNK_HUMAN	Q09666	Neuroblast differentiation-associated protein AHNAK	AHNAK	AHNK_HUMAN|Q09666_K4929	G-6599_DMSO_30min	-0.137923	0.284713	-0.484429	19.423	0.633499	0.918939
AHNK_HUMAN	Q09666	Neuroblast differentiation-associated protein AHNAK	AHNAK	AHNK_HUMAN|Q09666_K4945	G-6599_DMSO_30min	-0.13621	0.292014	-0.466449	19.2539	0.646128	0.923242
AHNK_HUMAN	Q09666	Neuroblast differentiation-associated protein AHNAK	AHNAK	AHNK_HUMAN|Q09666_K5747	G-6599_DMSO_30min	-0.381609	0.401971	-0.949344	17.7695	0.35518	0.814981
AHNK_HUMAN	Q09666	Neuroblast differentiation-associated protein AHNAK	AHNAK	AHNK_HUMAN|Q09666_K956	G-6599_DMSO_30min	-0.22612	0.292071	-0.774196	19.2527	0.448218	0.853544
AHNK_HUMAN	Q09666	Neuroblast differentiation-associated protein AHNAK	AHNAK	AHNK_HUMAN|Q09666_K2416	G-6599_DMSO_30min	-0.309067	0.276309	-1.11856	19.6361	0.276827	0.775575
AHNK_HUMAN	Q09666	Neuroblast differentiation-associated protein AHNAK	AHNAK	AHNK_HUMAN|Q09666_K976	G-6599_DMSO_30min	-0.190413	0.255604	-0.744952	20.2627	0.464854	0.858835
AHNK_HUMAN	Q09666	Neuroblast differentiation-associated protein AHNAK	AHNAK	AHNK_HUMAN|Q09666_K5524	G-6599_DMSO_30min	-0.318946	0.342768	-0.930501	18.38	0.364173	0.819055
AHNK_HUMAN	Q09666	Neuroblast differentiation-associated protein AHNAK	AHNAK	AHNK_HUMAN|Q09666_K833	G-6599_DMSO_30min	-0.283625	0.286216	-0.99095	19.3871	0.333918	0.805398
AHNK_HUMAN	Q09666	Neuroblast differentiation-associated protein AHNAK	AHNAK	AHNK_HUMAN|Q09666_K997	G-6599_DMSO_30min	0.0677135	0.398817	0.169786	17.795	0.867094	0.979828
AHNK_HUMAN	Q09666	Neuroblast differentiation-associated protein AHNAK	AHNAK	AHNK_HUMAN|Q09666_K1140	G-6599_DMSO_30min	-0.093938	0.283672	-0.33115	19.4483	0.744073	0.953513
AHNK_HUMAN	Q09666	Neuroblast differentiation-associated protein AHNAK	AHNAK	AHNK_HUMAN|Q09666_K1360	G-6599_DMSO_30min	-0.283157	0.286867	-0.987069	19.3717	0.335778	0.805507
AHNK_HUMAN	Q09666	Neuroblast differentiation-associated protein AHNAK	AHNAK	AHNK_HUMAN|Q09666_K5204	G-6599_DMSO_30min	-0.172789	0.328149	-0.526558	18.5878	0.604728	0.9097
AHNK_HUMAN	Q09666	Neuroblast differentiation-associated protein AHNAK	AHNAK	AHNK_HUMAN|Q09666_K1381	G-6599_DMSO_30min	-0.020539	0.348671	-0.0589065	18.304	0.953665	0.994
AHNK_HUMAN	Q09666	Neuroblast differentiation-associated protein AHNAK	AHNAK	AHNK_HUMAN|Q09666_K5056	G-6599_DMSO_30min	-0.0235101	1.09684	-0.0214343	16.4303	0.983157	0.997244
AHNK_HUMAN	Q09666	Neuroblast differentiation-associated protein AHNAK	AHNAK	AHNK_HUMAN|Q09666_K4489	G-6599_DMSO_30min	-0.0606849	0.335673	-0.180786	18.4772	0.858504	0.976159
AHNK_HUMAN	Q09666	Neuroblast differentiation-associated protein AHNAK	AHNAK	AHNK_HUMAN|Q09666_K1904	G-6599_DMSO_30min	-0.213351	0.322045	-0.66249	18.6836	0.515747	0.881344
AHNK_HUMAN	Q09666	Neuroblast differentiation-associated protein AHNAK	AHNAK	AHNK_HUMAN|Q09666_K2194	G-6599_DMSO_30min	-0.32911	0.329547	-0.998675	18.5666	0.330791	0.803357
AHNK_HUMAN	Q09666	Neuroblast differentiation-associated protein AHNAK	AHNAK	AHNK_HUMAN|Q09666_K1668	G-6599_DMSO_30min	0.0515179	0.35232	0.146225	18.259	0.885346	0.983932
AHNK_HUMAN	Q09666	Neuroblast differentiation-associated protein AHNAK	AHNAK	AHNK_HUMAN|Q09666_K855	G-6599_DMSO_30min	-0.176698	0.317056	-0.557308	18.7664	0.583904	0.902512
AHNK_HUMAN	Q09666	Neuroblast differentiation-associated protein AHNAK	AHNAK	AHNK_HUMAN|Q09666_K2327	G-6599_DMSO_30min	-0.0389073	0.3833	-0.101506	17.9301	0.920275	0.991061
AHNK_HUMAN	Q09666	Neuroblast differentiation-associated protein AHNAK	AHNAK	AHNK_HUMAN|Q09666_K2342	G-6599_DMSO_30min	0.00154423	0.324895	0.00475299	18.6381	0.996258	0.999362
AHNK_HUMAN	Q09666	Neuroblast differentiation-associated protein AHNAK	AHNAK	AHNK_HUMAN|Q09666_K5462	G-6599_DMSO_30min	-0.295616	0.290887	-1.01626	19.2791	0.322093	0.799008
AHNK_HUMAN	Q09666	Neuroblast differentiation-associated protein AHNAK	AHNAK	AHNK_HUMAN|Q09666_K5272	G-6599_DMSO_30min	0.145921	0.284788	0.512384	19.4212	0.61416	0.909948
AHNK_HUMAN	Q09666	Neuroblast differentiation-associated protein AHNAK	AHNAK	AHNK_HUMAN|Q09666_K497	G-6599_DMSO_30min	-0.133635	0.272189	-0.490964	19.7484	0.628864	0.917169
AHNK_HUMAN	Q09666	Neuroblast differentiation-associated protein AHNAK	AHNAK	AHNK_HUMAN|Q09666_K5725	G-6599_DMSO_30min	-0.478416	0.316997	-1.50921	18.7674	0.147897	0.677931
AHNK_HUMAN	Q09666	Neuroblast differentiation-associated protein AHNAK	AHNAK	AHNK_HUMAN|Q09666_K1184	G-6599_DMSO_30min	-0.228522	0.285221	-0.801209	19.4108	0.432709	0.843627
AHNK_HUMAN	Q09666	Neuroblast differentiation-associated protein AHNAK	AHNAK	AHNK_HUMAN|Q09666_K1652	G-6599_DMSO_30min	0.0128384	0.346673	0.0370332	18.3293	0.970859	0.996087
AHNK_HUMAN	Q09666	Neuroblast differentiation-associated protein AHNAK	AHNAK	AHNK_HUMAN|Q09666_K1616	G-6599_DMSO_30min	0.0388085	0.255132	0.152112	20.279	0.880602	0.983654
AHNK_HUMAN	Q09666	Neuroblast differentiation-associated protein AHNAK	AHNAK	AHNK_HUMAN|Q09666_K5612	G-6599_DMSO_30min	-0.236874	0.316566	-0.748263	18.7748	0.463573	0.85814
AHNK_HUMAN	Q09666	Neuroblast differentiation-associated protein AHNAK	AHNAK	AHNK_HUMAN|Q09666_K4985	G-6599_DMSO_30min	-0.283799	0.270712	-1.04834	19.7901	0.307116	0.793269
AHNK_HUMAN	Q09666	Neuroblast differentiation-associated protein AHNAK	AHNAK	AHNK_HUMAN|Q09666_K5821	G-6599_DMSO_30min	-0.437577	0.300135	-1.45793	19.0813	0.161122	0.69168
AHNK_HUMAN	Q09666	Neuroblast differentiation-associated protein AHNAK	AHNAK	AHNK_HUMAN|Q09666_K4905	G-6599_DMSO_30min	-0.269252	0.309939	-0.868726	18.8921	0.3959	0.824931
AHNK_HUMAN	Q09666	Neuroblast differentiation-associated protein AHNAK	AHNAK	AHNK_HUMAN|Q09666_K5598	G-6599_DMSO_30min	-0.0126062	0.398104	-0.0316656	17.8008	0.975091	0.997104
AHNK_HUMAN	Q09666	Neuroblast differentiation-associated protein AHNAK	AHNAK	AHNK_HUMAN|Q09666_K3404	G-6599_DMSO_30min	-0.291928	0.336001	-0.86883	18.4726	0.396088	0.824931
AHNK_HUMAN	Q09666	Neuroblast differentiation-associated protein AHNAK	AHNAK	AHNK_HUMAN|Q09666_K5767	G-6599_DMSO_30min	-0.574371	0.309227	-1.85744	18.9052	0.078896	0.619603
AHNK_HUMAN	Q09666	Neuroblast differentiation-associated protein AHNAK	AHNAK	AHNK_HUMAN|Q09666_K2349	G-6599_DMSO_30min	-0.237647	0.282769	-0.840429	19.4705	0.41087	0.830249
AHNK_HUMAN	Q09666	Neuroblast differentiation-associated protein AHNAK	AHNAK	AHNK_HUMAN|Q09666_K807	G-6599_DMSO_30min	-0.304602	0.263322	-1.15677	20.0102	0.260991	0.762323
AHNK_HUMAN	Q09666	Neuroblast differentiation-associated protein AHNAK	AHNAK	AHNK_HUMAN|Q09666_K1305	G-6599_DMSO_30min	-0.096836	0.315181	-0.307239	18.7986	0.762039	0.9567
AHNK_HUMAN	Q09666	Neuroblast differentiation-associated protein AHNAK	AHNAK	AHNK_HUMAN|Q09666_K1870	G-6599_DMSO_30min	-0.0636016	0.341705	-0.18613	18.3942	0.85438	0.97609
AHNK_HUMAN	Q09666	Neuroblast differentiation-associated protein AHNAK	AHNAK	AHNK_HUMAN|Q09666_K5512	G-6599_DMSO_30min	-0.203077	0.315926	-0.642799	18.7857	0.528123	0.886063
AHNK_HUMAN	Q09666	Neuroblast differentiation-associated protein AHNAK	AHNAK	AHNK_HUMAN|Q09666_K3363	G-6599_DMSO_30min	-0.259552	0.343035	-0.756634	18.3765	0.458861	0.856068
AHNK_HUMAN	Q09666	Neuroblast differentiation-associated protein AHNAK	AHNAK	AHNK_HUMAN|Q09666_K2385	G-6599_DMSO_30min	-0.0120782	0.308347	-0.0391707	18.9215	0.969165	0.996087
AHNK_HUMAN	Q09666	Neuroblast differentiation-associated protein AHNAK	AHNAK	AHNK_HUMAN|Q09666_K1319	G-6599_DMSO_30min	-0.283834	0.253871	-1.11802	20.3229	0.276599	0.775575
AHNK_HUMAN	Q09666	Neuroblast differentiation-associated protein AHNAK	AHNAK	AHNK_HUMAN|Q09666_K3374	G-6599_DMSO_30min	-0.374062	0.303775	-1.23138	19.0087	0.233199	0.744791
AHNK_HUMAN	Q09666	Neuroblast differentiation-associated protein AHNAK	AHNAK	AHNK_HUMAN|Q09666_K3445	G-6599_DMSO_30min	-0.233301	0.306359	-0.761528	18.9589	0.455711	0.853831
AHNK_HUMAN	Q09666	Neuroblast differentiation-associated protein AHNAK	AHNAK	AHNK_HUMAN|Q09666_K3488	G-6599_DMSO_30min	-0.0199627	0.285937	-0.0698148	19.3937	0.945056	0.992029
AHNK_HUMAN	Q09666	Neuroblast differentiation-associated protein AHNAK	AHNAK	AHNK_HUMAN|Q09666_K3425	G-6599_DMSO_30min	-0.258804	0.324332	-0.797961	18.647	0.434938	0.844831
AHNK_HUMAN	Q09666	Neuroblast differentiation-associated protein AHNAK	AHNAK	AHNK_HUMAN|Q09666_K3573	G-6599_DMSO_30min	-0.0971867	0.283548	-0.342752	19.4513	0.735461	0.950156
AHNK_HUMAN	Q09666	Neuroblast differentiation-associated protein AHNAK	AHNAK	AHNK_HUMAN|Q09666_K5740	G-6599_DMSO_30min	-0.493458	0.320012	-1.542	18.7168	0.139813	0.673346
AHNK_HUMAN	Q09666	Neuroblast differentiation-associated protein AHNAK	AHNAK	AHNK_HUMAN|Q09666_K2401	G-6599_DMSO_30min	0.0926472	0.508391	0.182236	17.1776	0.857531	0.976159
AHNK_HUMAN	Q09666	Neuroblast differentiation-associated protein AHNAK	AHNAK	AHNK_HUMAN|Q09666_K3583	G-6599_DMSO_30min	0.30491	0.862082	0.35369	16.5546	0.728036	0.947898
AHNK_HUMAN	Q09666	Neuroblast differentiation-associated protein AHNAK	AHNAK	AHNK_HUMAN|Q09666_K2850	G-6599_DMSO_30min	-0.162129	0.375663	-0.431581	18.0033	0.67117	0.931008
AHNK_HUMAN	Q09666	Neuroblast differentiation-associated protein AHNAK	AHNAK	AHNK_HUMAN|Q09666_K961	G-6599_DMSO_30min	0.0627789	0.369748	0.169788	18.0632	0.867064	0.979828
AHNK_HUMAN	Q09666	Neuroblast differentiation-associated protein AHNAK	AHNAK	AHNK_HUMAN|Q09666_K5528	G-6599_DMSO_30min	-0.45448	0.362606	-1.25337	18.1398	0.225985	0.737384
AHNK_HUMAN	Q09666	Neuroblast differentiation-associated protein AHNAK	AHNAK	AHNK_HUMAN|Q09666_K3372	G-6599_DMSO_30min	-0.405318	0.287379	-1.4104	19.3597	0.174288	0.700105
AHNK_HUMAN	Q09666	Neuroblast differentiation-associated protein AHNAK	AHNAK	AHNK_HUMAN|Q09666_K1609	G-6599_DMSO_30min	-0.129449	0.307571	-0.420874	18.936	0.678585	0.933709
AHNK_HUMAN	Q09666	Neuroblast differentiation-associated protein AHNAK	AHNAK	AHNK_HUMAN|Q09666_K3481	G-6599_DMSO_30min	-0.451781	0.285052	-1.58491	19.4148	0.129141	0.666892
AHNK_HUMAN	Q09666	Neuroblast differentiation-associated protein AHNAK	AHNAK	AHNK_HUMAN|Q09666_K2780	G-6599_DMSO_30min	-0.0827124	0.346149	-0.23895	18.336	0.813795	0.966647
AHNK_HUMAN	Q09666	Neuroblast differentiation-associated protein AHNAK	AHNAK	AHNK_HUMAN|Q09666_K802	G-6599_DMSO_30min	0.0316361	0.443158	0.0713879	17.4874	0.943899	0.992029
AHNK_HUMAN	Q09666	Neuroblast differentiation-associated protein AHNAK	AHNAK	AHNK_HUMAN|Q09666_K3303	G-6599_DMSO_30min	-0.209851	0.309109	-0.678891	18.9073	0.505433	0.87472
AHNK_HUMAN	Q09666	Neuroblast differentiation-associated protein AHNAK	AHNAK	AHNK_HUMAN|Q09666_K3532	G-6599_DMSO_30min	-0.286394	0.287466	-0.996269	19.3576	0.331411	0.803357
AHNK2_HUMAN	Q8IVF2	Protein AHNAK2	AHNAK2	AHNK2_HUMAN|Q8IVF2_K185	G-6599_DMSO_30min	-0.352507	0.304277	-1.15851	19.3831	0.260732	0.762312
AHNK2_HUMAN	Q8IVF2	Protein AHNAK2	AHNAK2	AHNK2_HUMAN|Q8IVF2_K139	G-6599_DMSO_30min	-0.436452	0.428682	-1.01812	16.6659	0.323172	0.799542
AHNK2_HUMAN	Q8IVF2	Protein AHNAK2	AHNAK2	AHNK2_HUMAN|Q8IVF2_K5426	G-6599_DMSO_30min	0.0160931	0.390928	0.0411664	18.0822	0.967614	0.995716
AHNK2_HUMAN	Q8IVF2	Protein AHNAK2	AHNAK2	AHNK2_HUMAN|Q8IVF2_K1097	G-6599_DMSO_30min	-0.282424	0.259821	-1.08699	20.6715	0.289553	0.783787
AHNK2_HUMAN	Q8IVF2	Protein AHNAK2	AHNAK2	AHNK2_HUMAN|Q8IVF2_K2233	G-6599_DMSO_30min	-0.247262	0.349325	-0.707827	18.5781	0.487839	0.868316
AHNK2_HUMAN	Q8IVF2	Protein AHNAK2	AHNAK2	AHNK2_HUMAN|Q8IVF2_K839	G-6599_DMSO_30min	-0.325857	0.288348	-1.13008	19.7709	0.271965	0.772136
AIMP1_HUMAN	Q12904	Aminoacyl tRNA synthase complex-interacting multifunctional protein 1	AIMP1	AIMP1_HUMAN|Q12904_K312	G-6599_DMSO_30min	-0.236371	0.280944	-0.841346	29.1106	0.407012	0.828629
AIMP1_HUMAN	Q12904	Aminoacyl tRNA synthase complex-interacting multifunctional protein 1	AIMP1	AIMP1_HUMAN|Q12904_K33	G-6599_DMSO_30min	-0.459744	0.289496	-1.58808	28.4249	0.12333	0.663341
AIMP1_HUMAN	Q12904	Aminoacyl tRNA synthase complex-interacting multifunctional protein 1	AIMP1	AIMP1_HUMAN|Q12904_K63	G-6599_DMSO_30min	-0.066553	0.30771	-0.216285	27.0495	0.830388	0.969384
AIMP1_HUMAN	Q12904-2	Aminoacyl tRNA synthase complex-interacting multifunctional protein 1 (isoform 2)	AIMP1	AIMP1_HUMAN|Q12904-2_K24	G-6599_DMSO_30min	-0.2995	0.290871	-1.02966	28.3165	0.311883	0.795089
AIMP2_HUMAN	Q13155	Aminoacyl tRNA synthase complex-interacting multifunctional protein 2	AIMP2	AIMP2_HUMAN|Q13155_K70	G-6599_DMSO_30min	0.0666708	0.288777	0.230873	17.71	0.820059	0.967371
AJUBA_HUMAN	Q96IF1	LIM domain-containing protein ajuba	AJUBA	AJUBA_HUMAN|Q96IF1_K413	G-6599_DMSO_30min	-0.194797	0.386168	-0.504436	17.2996	0.620319	0.913632
AKA12_HUMAN	Q02952	A-kinase anchor protein 12	AKAP12	AKA12_HUMAN|Q02952_K182	G-6599_DMSO_30min	-0.307525	0.363613	-0.845748	18.1125	0.408728	0.829297
AKA12_HUMAN	Q02952	A-kinase anchor protein 12	AKAP12	AKA12_HUMAN|Q02952_K1548	G-6599_DMSO_30min	0.0573545	0.42346	0.135442	17.5999	0.893799	0.986529
AKA12_HUMAN	Q02952	A-kinase anchor protein 12	AKAP12	AKA12_HUMAN|Q02952_K177	G-6599_DMSO_30min	-0.277966	0.254105	-1.0939	20.2785	0.286823	0.782338
AKAP2_HUMAN	Q9Y2D5	A-kinase anchor protein 2	AKAP2	AKAP2_HUMAN|Q9Y2D5_K448	G-6599_DMSO_30min	-0.0497716	0.478535	-0.104008	19.8016	0.918209	0.990623
AKAP9_HUMAN	Q99996	A-kinase anchor protein 9	AKAP9	AKAP9_HUMAN|Q99996_K3719	G-6599_DMSO_30min	-0.345617	0.236094	-1.4639	21.1841	0.157905	0.689529
AKAP9_HUMAN	Q99996	A-kinase anchor protein 9	AKAP9	AKAP9_HUMAN|Q99996_K703	G-6599_DMSO_30min	-0.393716	0.28119	-1.40018	19.6153	0.177079	0.702264
AKIB1_HUMAN	Q9P2G1	Ankyrin repeat and IBR domain-containing protein 1	ANKIB1	AKIB1_HUMAN|Q9P2G1_K661	G-6599_DMSO_30min	-0.272723	0.383451	-0.711235	18.1829	0.485964	0.867613
AKP13_HUMAN	Q12802	A-kinase anchor protein 13	AKAP13	AKP13_HUMAN|Q12802_K2368	G-6599_DMSO_30min	-0.405145	0.235945	-1.71711	19.5808	0.101735	0.641587
AL14E_HUMAN	Q8N8R7	ARL14 effector protein	ARL14EP	AL14E_HUMAN|Q8N8R7_K191	G-6599_DMSO_30min	-0.410283	0.270626	-1.51605	22.7521	0.143277	0.675388
AL1A3_HUMAN	P47895	Aldehyde dehydrogenase family 1 member A3	ALDH1A3	AL1A3_HUMAN|P47895_K423	G-6599_DMSO_30min	-0.046213	0.519503	-0.0889561	17.5527	0.930124	0.991061
AL3B1_HUMAN	P43353	Aldehyde dehydrogenase family 3 member B1	ALDH3B1	AL3B1_HUMAN|P43353_K194	G-6599_DMSO_30min	-0.144075	0.214795	-0.670757	20.139	0.509995	0.875983
ALDOA_HUMAN	P04075	Fructose-bisphosphate aldolase A	ALDOA	ALDOA_HUMAN|P04075_K312	G-6599_DMSO_30min	-0.0931676	0.276896	-0.336472	18.299	0.740343	0.951851
ALDOA_HUMAN	P04075	Fructose-bisphosphate aldolase A	ALDOA	ALDOA_HUMAN|P04075_K322	G-6599_DMSO_30min	-0.0409622	0.380654	-0.10761	17.297	0.915544	0.989723
ALDOA_HUMAN	P04075	Fructose-bisphosphate aldolase A	ALDOA	ALDOA_HUMAN|P04075_K200	G-6599_DMSO_30min	0.0669266	0.27998	0.239041	18.2513	0.813738	0.966647
ALDOA_HUMAN	P04075	Fructose-bisphosphate aldolase A	ALDOA	ALDOA_HUMAN|P04075_K108	G-6599_DMSO_30min	-0.0565582	0.257007	-0.220065	18.6524	0.828211	0.9692
ALDOA_HUMAN	P04075	Fructose-bisphosphate aldolase A	ALDOA	ALDOA_HUMAN|P04075_K153	G-6599_DMSO_30min	0.0667391	0.429108	0.15553	17.0645	0.878229	0.982915
ALDOA_HUMAN	P04075	Fructose-bisphosphate aldolase A	ALDOA	ALDOA_HUMAN|P04075_K330	G-6599_DMSO_30min	-0.241474	0.358013	-0.674486	17.4408	0.508845	0.875876
ALDOA_HUMAN	P04075	Fructose-bisphosphate aldolase A	ALDOA	ALDOA_HUMAN|P04075_K42	G-6599_DMSO_30min	-0.220521	0.31278	-0.705035	17.8326	0.489896	0.868658
ALDOA_HUMAN	P04075	Fructose-bisphosphate aldolase A	ALDOA	ALDOA_HUMAN|P04075_K101	G-6599_DMSO_30min	-0.160025	0.297958	-0.537072	18.0037	0.597794	0.905892
ALDR_HUMAN	P15121	Aldose reductase	AKR1B1	ALDR_HUMAN|P15121_K263	G-6599_DMSO_30min	0.639052	0.630554	1.01348	11.5043	0.331673	0.803357
ALDR_HUMAN	P15121	Aldose reductase	AKR1B1	ALDR_HUMAN|P15121_K12	G-6599_DMSO_30min	-0.0218529	0.798228	-0.0273768	21.6772	0.97841	0.997104
ALG1_HUMAN	Q9BT22	Chitobiosyldiphosphodolichol beta-mannosyltransferase	ALG1	ALG1_HUMAN|Q9BT22_K217	G-6599_DMSO_30min	-0.14349	0.266708	-0.538007	20.3247	0.596415	0.905892
ALG11_HUMAN	Q2TAA5	GDP-Man:Man(3)GlcNAc(2)-PP-Dol alpha-1,2-mannosyltransferase	ALG11	ALG11_HUMAN|Q2TAA5_K329	G-6599_DMSO_30min	0.368942	0.257683	1.43176	20.2055	0.167499	0.694874
ALG2_HUMAN	Q9H553	Alpha-1,3/1,6-mannosyltransferase ALG2	ALG2	ALG2_HUMAN|Q9H553_K397	G-6599_DMSO_30min	0.224116	0.895109	0.250378	16.4537	0.805395	0.965351
ALG2_HUMAN	Q9H553	Alpha-1,3/1,6-mannosyltransferase ALG2	ALG2	ALG2_HUMAN|Q9H553_K146	G-6599_DMSO_30min	-0.169943	0.274821	-0.618376	18.7394	0.543771	0.888437
ALKB2_HUMAN	Q6NS38	Alpha-ketoglutarate-dependent dioxygenase alkB homolog 2	ALKBH2	ALKB2_HUMAN|Q6NS38_K104	G-6599_DMSO_30min	-0.645821	0.268668	-2.40378	18.5225	0.026882	0.545928
ALKB5_HUMAN	Q6P6C2	RNA demethylase ALKBH5	ALKBH5	ALKB5_HUMAN|Q6P6C2_K274	G-6599_DMSO_30min	-0.358802	0.306058	-1.17233	20.4651	0.25453	0.759612
ALS2_HUMAN	Q96Q42	Alsin	ALS2	ALS2_HUMAN|Q96Q42_K1374	G-6599_DMSO_30min	-0.246271	0.264667	-0.930493	21.802	0.362305	0.818459
AMD_HUMAN	P19021	Peptidyl-glycine alpha-amidating monooxygenase	PAM	AMD_HUMAN|P19021_K811	G-6599_DMSO_30min	-0.412316	0.243557	-1.6929	20.44	0.105663	0.645285
AMD_HUMAN	P19021	Peptidyl-glycine alpha-amidating monooxygenase	PAM	AMD_HUMAN|P19021_K712	G-6599_DMSO_30min	-0.199435	0.236383	-0.843698	20.7242	0.408472	0.829212
AMD_HUMAN	P19021	Peptidyl-glycine alpha-amidating monooxygenase	PAM	AMD_HUMAN|P19021_K370	G-6599_DMSO_30min	-0.0863476	0.248924	-0.346883	20.2447	0.732259	0.94957
AMN1_HUMAN	Q8IY45	Protein AMN1 homolog	AMN1	AMN1_HUMAN|Q8IY45_K89	G-6599_DMSO_30min	-0.0339034	0.238969	-0.141874	20.4152	0.888571	0.984477
AMOL1_HUMAN	Q8IY63	Angiomotin-like protein 1	AMOTL1	AMOL1_HUMAN|Q8IY63_K316	G-6599_DMSO_30min	-0.491423	0.329513	-1.49136	17.8594	0.153319	0.684464
AMOL1_HUMAN	Q8IY63	Angiomotin-like protein 1	AMOTL1	AMOL1_HUMAN|Q8IY63_K254	G-6599_DMSO_30min	-0.532378	0.360223	-1.47791	17.5837	0.15712	0.687084
AMOL1_HUMAN	Q8IY63	Angiomotin-like protein 1	AMOTL1	AMOL1_HUMAN|Q8IY63_K174	G-6599_DMSO_30min	-0.490892	0.438865	-1.11855	17.1312	0.278772	0.777343
AMOL1_HUMAN	Q8IY63	Angiomotin-like protein 1	AMOTL1	AMOL1_HUMAN|Q8IY63_K195	G-6599_DMSO_30min	-0.679338	0.490302	-1.38555	16.9486	0.183849	0.706847
AMOL1_HUMAN	Q8IY63	Angiomotin-like protein 1	AMOTL1	AMOL1_HUMAN|Q8IY63_K503	G-6599_DMSO_30min	-0.344523	0.270375	-1.27424	18.7011	0.218185	0.733782
AMOL1_HUMAN	Q8IY63	Angiomotin-like protein 1	AMOTL1	AMOL1_HUMAN|Q8IY63_K302	G-6599_DMSO_30min	-0.658247	0.33997	-1.93619	17.7567	0.0689267	0.596256
AMPB_HUMAN	Q9H4A4	Aminopeptidase B	RNPEP	AMPB_HUMAN|Q9H4A4_K188	G-6599_DMSO_30min	-0.36353	0.236979	-1.53402	19.7385	0.140899	0.673969
AMPL_HUMAN	P28838	Cytosol aminopeptidase	LAP3	AMPL_HUMAN|P28838_K188	G-6599_DMSO_30min	-0.0139255	0.31226	-0.0445958	19.9446	0.964873	0.995585
AMRA1_HUMAN	Q9C0C7	Activating molecule in BECN1-regulated autophagy protein 1	AMBRA1	AMRA1_HUMAN|Q9C0C7_K175	G-6599_DMSO_30min	-0.448503	0.27776	-1.61471	19.89	0.122125	0.662647
AN13A_HUMAN	Q8IZ07	Ankyrin repeat domain-containing protein 13A	ANKRD13A	AN13A_HUMAN|Q8IZ07_K410	G-6599_DMSO_30min	-0.230974	0.80838	-0.285724	16.4339	0.77866	0.959773
AN13A_HUMAN	Q8IZ07	Ankyrin repeat domain-containing protein 13A	ANKRD13A	AN13A_HUMAN|Q8IZ07_K257	G-6599_DMSO_30min	0.623203	1.03439	0.602484	16.3548	0.555115	0.890628
AN13A_HUMAN	Q8IZ07	Ankyrin repeat domain-containing protein 13A	ANKRD13A	AN13A_HUMAN|Q8IZ07_K400	G-6599_DMSO_30min	0.348002	0.351653	0.989617	17.33	0.335978	0.805507
AN13A_HUMAN	Q8IZ07	Ankyrin repeat domain-containing protein 13A	ANKRD13A	AN13A_HUMAN|Q8IZ07_K217	G-6599_DMSO_30min	-0.0914743	0.245904	-0.371993	18.5503	0.714114	0.944559
AN13A_HUMAN	Q8IZ07	Ankyrin repeat domain-containing protein 13A	ANKRD13A	AN13A_HUMAN|Q8IZ07_K239	G-6599_DMSO_30min	-0.185301	0.292186	-0.634189	17.8448	0.534004	0.886063
AN13C_HUMAN	Q8N6S4	Ankyrin repeat domain-containing protein 13C	ANKRD13C	AN13C_HUMAN|Q8N6S4_K387	G-6599_DMSO_30min	0.041818	0.228267	0.183198	21.4528	0.856363	0.976159
AN32A_HUMAN	P39687	Acidic leucine-rich nuclear phosphoprotein 32 family member A	ANP32A	AN32A_HUMAN|P39687_K110	G-6599_DMSO_30min	-0.509634	0.290067	-1.75695	18.7565	0.0952381	0.636141
AN32A_HUMAN	P39687	Acidic leucine-rich nuclear phosphoprotein 32 family member A	ANP32A	AN32A_HUMAN|P39687_K116	G-6599_DMSO_30min	-0.404566	0.402613	-1.00485	17.5008	0.328661	0.802715
AN32A_HUMAN	P39687	Acidic leucine-rich nuclear phosphoprotein 32 family member A	ANP32A	AN32A_HUMAN|P39687_K86	G-6599_DMSO_30min	-0.300251	0.304471	-0.98614	18.5095	0.336781	0.805749
AN32A_HUMAN	P39687	Acidic leucine-rich nuclear phosphoprotein 32 family member A	ANP32A	AN32A_HUMAN|P39687_K99	G-6599_DMSO_30min	-0.664683	0.28347	-2.34481	18.8833	0.0301243	0.545928
AN32A_HUMAN	P39687	Acidic leucine-rich nuclear phosphoprotein 32 family member A	ANP32A	AN32A_HUMAN|P39687_K101	G-6599_DMSO_30min	-0.216585	0.439399	-0.492912	17.291	0.628276	0.917061
AN32B_HUMAN	Q92688	Acidic leucine-rich nuclear phosphoprotein 32 family member B	ANP32B	AN32B_HUMAN|Q92688_K99	G-6599_DMSO_30min	-0.390324	0.363475	-1.07387	25.3453	0.293	0.787732
AN32B_HUMAN	Q92688	Acidic leucine-rich nuclear phosphoprotein 32 family member B	ANP32B	AN32B_HUMAN|Q92688_K86	G-6599_DMSO_30min	0.202215	0.42937	0.470958	22.5601	0.642193	0.922083
AN32E_HUMAN	Q9BTT0	Acidic leucine-rich nuclear phosphoprotein 32 family member E	ANP32E	AN32E_HUMAN|Q9BTT0_K113	G-6599_DMSO_30min	-0.275722	0.36564	-0.754079	17.7427	0.460693	0.857171
AN32E_HUMAN	Q9BTT0	Acidic leucine-rich nuclear phosphoprotein 32 family member E	ANP32E	AN32E_HUMAN|Q9BTT0_K99	G-6599_DMSO_30min	-0.558293	0.319343	-1.74825	18.2381	0.0972332	0.636286
ANFY1_HUMAN	Q9P2R3	Rabankyrin-5	ANKFY1	ANFY1_HUMAN|Q9P2R3_K937	G-6599_DMSO_30min	-0.103692	0.276116	-0.37554	18.5093	0.711528	0.943666
ANFY1_HUMAN	Q9P2R3	Rabankyrin-5	ANKFY1	ANFY1_HUMAN|Q9P2R3_K636	G-6599_DMSO_30min	0.0792222	0.401597	0.197268	17.274	0.845921	0.974232
ANFY1_HUMAN	Q9P2R3	Rabankyrin-5	ANKFY1	ANFY1_HUMAN|Q9P2R3_K851	G-6599_DMSO_30min	-0.105238	0.256827	-0.409763	18.8884	0.68659	0.93739
ANFY1_HUMAN	Q9P2R3-2	Rabankyrin-5 (isoform 2)	ANKFY1	ANFY1_HUMAN|Q9P2R3-2_K636	G-6599_DMSO_30min	-0.0967232	0.4033	-0.239829	17.265	0.813287	0.966647
ANKH1_HUMAN	Q8IWZ3	Ankyrin repeat and KH domain-containing protein 1	ANKHD1	ANKH1_HUMAN|Q8IWZ3_K194	G-6599_DMSO_30min	-0.200712	0.314283	-0.638634	18.5783	0.530856	0.886063
ANKH1_HUMAN	Q8IWZ3	Ankyrin repeat and KH domain-containing protein 1	ANKHD1	ANKH1_HUMAN|Q8IWZ3_K1960	G-6599_DMSO_30min	-0.0452595	0.243688	-0.185727	20.2863	0.854503	0.97609
ANKL2_HUMAN	Q86XL3	Ankyrin repeat and LEM domain-containing protein 2	ANKLE2	ANKL2_HUMAN|Q86XL3_K546	G-6599_DMSO_30min	-0.366492	0.240145	-1.52613	19.5605	0.142986	0.67505
ANKR1_HUMAN	Q15327	Ankyrin repeat domain-containing protein 1	ANKRD1	ANKR1_HUMAN|Q15327_K13	G-6599_DMSO_30min	-0.16363	0.349499	-0.468186	30.9035	0.642937	0.922152
ANKR1_HUMAN	Q15327	Ankyrin repeat domain-containing protein 1	ANKRD1	ANKR1_HUMAN|Q15327_K132	G-6599_DMSO_30min	0.266489	0.346121	0.76993	31.0829	0.447154	0.852569
ANKR1_HUMAN	Q15327	Ankyrin repeat domain-containing protein 1	ANKRD1	ANKR1_HUMAN|Q15327_K217	G-6599_DMSO_30min	0.0857432	0.32796	0.261444	31.8763	0.795432	0.964
ANKR1_HUMAN	Q15327	Ankyrin repeat domain-containing protein 1	ANKRD1	ANKR1_HUMAN|Q15327_K61	G-6599_DMSO_30min	-0.00614573	0.334229	-0.0183878	31.6434	0.985445	0.997403
ANKR1_HUMAN	Q15327	Ankyrin repeat domain-containing protein 1	ANKRD1	ANKR1_HUMAN|Q15327_K153	G-6599_DMSO_30min	0.608966	0.386555	1.57537	28.7264	0.126122	0.665478
ANKR1_HUMAN	Q15327	Ankyrin repeat domain-containing protein 1	ANKRD1	ANKR1_HUMAN|Q15327_K46	G-6599_DMSO_30min	0.130831	0.401104	0.326177	27.8826	0.746726	0.953513
ANLN_HUMAN	Q9NQW6	Actin-binding protein anillin	ANLN	ANLN_HUMAN|Q9NQW6_K903	G-6599_DMSO_30min	-0.877169	0.258335	-3.39547	18.0212	0.00321938	0.3325
ANLN_HUMAN	Q9NQW6	Actin-binding protein anillin	ANLN	ANLN_HUMAN|Q9NQW6_K1092	G-6599_DMSO_30min	-0.438881	0.224781	-1.95248	18.6317	0.0660719	0.595573
ANM1_HUMAN	Q99873	Protein arginine N-methyltransferase 1	PRMT1	ANM1_HUMAN|Q99873_K134	G-6599_DMSO_30min	-0.303323	0.284339	-1.06677	19.6655	0.298999	0.790224
ANM1_HUMAN	Q99873	Protein arginine N-methyltransferase 1	PRMT1	ANM1_HUMAN|Q99873_K145	G-6599_DMSO_30min	-0.21396	0.239113	-0.894811	21.2415	0.380916	0.824357
ANM1_HUMAN	Q99873	Protein arginine N-methyltransferase 1	PRMT1	ANM1_HUMAN|Q99873_K233	G-6599_DMSO_30min	0.0342507	0.518244	0.06609	17.2041	0.948068	0.992676
ANM2_HUMAN	P55345	Protein arginine N-methyltransferase 2	PRMT2	ANM2_HUMAN|P55345_K124	G-6599_DMSO_30min	0.111749	0.29733	0.375842	28.7993	0.709789	0.943045
ANM3_HUMAN	O60678	Protein arginine N-methyltransferase 3	PRMT3	ANM3_HUMAN|O60678_K91	G-6599_DMSO_30min	0.441344	0.483526	0.912762	16.8219	0.374265	0.823137
ANM5_HUMAN	O14744	Protein arginine N-methyltransferase 5	PRMT5	ANM5_HUMAN|O14744_K240	G-6599_DMSO_30min	-0.45458	0.295133	-1.54026	18.8733	0.140097	0.673346
ANO6_HUMAN	Q4KMQ2	Anoctamin-6	ANO6	ANO6_HUMAN|Q4KMQ2_K888	G-6599_DMSO_30min	-0.285417	0.353836	-0.806637	18.487	0.430131	0.84226
ANR54_HUMAN	Q6NXT1	Ankyrin repeat domain-containing protein 54	ANKRD54	ANR54_HUMAN|Q6NXT1_K217	G-6599_DMSO_30min	-0.497584	0.243482	-2.04361	19.5936	0.0546716	0.589224
ANTR1_HUMAN	Q9H6X2	Anthrax toxin receptor 1	ANTXR1	ANTR1_HUMAN|Q9H6X2_K453	G-6599_DMSO_30min	-0.272368	0.345591	-0.788124	28.7365	0.437077	0.84617
ANTR1_HUMAN	Q9H6X2	Anthrax toxin receptor 1	ANTXR1	ANTR1_HUMAN|Q9H6X2_K445	G-6599_DMSO_30min	-0.453051	0.305838	-1.48134	31.2943	0.148516	0.678181
ANTR1_HUMAN	Q9H6X2	Anthrax toxin receptor 1	ANTXR1	ANTR1_HUMAN|Q9H6X2_K488	G-6599_DMSO_30min	-0.245306	0.337129	-0.727633	29.3015	0.472613	0.862984
ANX11_HUMAN	P50995	Annexin A11	ANXA11	ANX11_HUMAN|P50995_K214	G-6599_DMSO_30min	0.249217	0.701575	0.355225	16.6439	0.726883	0.947898
ANX11_HUMAN	P50995	Annexin A11	ANXA11	ANX11_HUMAN|P50995_K243	G-6599_DMSO_30min	-0.0607375	0.341978	-0.177606	18.0355	0.861012	0.976636
ANXA1_HUMAN	P04083	Annexin A1	ANXA1	ANXA1_HUMAN|P04083_K257	G-6599_DMSO_30min	-0.311705	0.358723	-0.868927	17.32	0.396768	0.824931
ANXA1_HUMAN	P04083	Annexin A1	ANXA1	ANXA1_HUMAN|P04083_K53	G-6599_DMSO_30min	-0.229078	0.373609	-0.61315	17.2325	0.547785	0.888969
ANXA1_HUMAN	P04083	Annexin A1	ANXA1	ANXA1_HUMAN|P04083_K317	G-6599_DMSO_30min	-0.0248062	0.698553	-0.0355109	16.5118	0.972098	0.996087
ANXA1_HUMAN	P04083	Annexin A1	ANXA1	ANXA1_HUMAN|P04083_K71	G-6599_DMSO_30min	-0.0337017	0.320479	-0.10516	17.6059	0.917437	0.990311
ANXA1_HUMAN	P04083	Annexin A1	ANXA1	ANXA1_HUMAN|P04083_K128	G-6599_DMSO_30min	-0.147239	0.607706	-0.242287	16.603	0.811525	0.966647
ANXA1_HUMAN	P04083	Annexin A1	ANXA1	ANXA1_HUMAN|P04083_K332	G-6599_DMSO_30min	-0.225313	0.407599	-0.552781	17.0686	0.587581	0.904609
ANXA1_HUMAN	P04083	Annexin A1	ANXA1	ANXA1_HUMAN|P04083_K214	G-6599_DMSO_30min	-0.614594	0.278115	-2.20985	18.0794	0.0402484	0.553837
ANXA1_HUMAN	P04083	Annexin A1	ANXA1	ANXA1_HUMAN|P04083_K26	G-6599_DMSO_30min	-0.37899	0.548578	-0.69086	16.6885	0.499151	0.871784
ANXA1_HUMAN	P04083	Annexin A1	ANXA1	ANXA1_HUMAN|P04083_K312	G-6599_DMSO_30min	-0.305828	0.346512	-0.882589	17.4006	0.389489	0.824931
ANXA1_HUMAN	P04083	Annexin A1	ANXA1	ANXA1_HUMAN|P04083_K29	G-6599_DMSO_30min	-0.496682	0.603491	-0.823014	16.6082	0.422161	0.837398
ANXA1_HUMAN	P04083	Annexin A1	ANXA1	ANXA1_HUMAN|P04083_K274	G-6599_DMSO_30min	-0.17627	0.22122	-0.796808	19.2347	0.435288	0.844938
ANXA2_HUMAN	P07355	Annexin A2	ANXA2	ANXA2_HUMAN|P07355_K313	G-6599_DMSO_30min	-0.566601	0.310932	-1.82227	20.2833	0.0831931	0.625206
ANXA2_HUMAN	P07355	Annexin A2	ANXA2	ANXA2_HUMAN|P07355_K324	G-6599_DMSO_30min	-0.436173	0.28061	-1.55437	21.3039	0.134826	0.667972
ANXA2_HUMAN	P07355	Annexin A2	ANXA2	ANXA2_HUMAN|P07355_K169	G-6599_DMSO_30min	-0.42699	0.27782	-1.53693	21.4166	0.138955	0.671959
ANXA2_HUMAN	P07355	Annexin A2	ANXA2	ANXA2_HUMAN|P07355_K49	G-6599_DMSO_30min	-0.00400943	0.483074	-0.00829982	17.8167	0.99347	0.998234
ANXA2_HUMAN	P07355	Annexin A2	ANXA2	ANXA2_HUMAN|P07355_K152	G-6599_DMSO_30min	-0.37088	0.424676	-0.873323	18.3087	0.393798	0.824931
ANXA2_HUMAN	P07355	Annexin A2	ANXA2	ANXA2_HUMAN|P07355_K233	G-6599_DMSO_30min	-0.200284	0.471439	-0.424836	17.8996	0.676019	0.932748
ANXA2_HUMAN	P07355	Annexin A2	ANXA2	ANXA2_HUMAN|P07355_K206	G-6599_DMSO_30min	-0.489143	0.330325	-1.48079	19.7845	0.154412	0.685018
ANXA2_HUMAN	P07355	Annexin A2	ANXA2	ANXA2_HUMAN|P07355_K212	G-6599_DMSO_30min	-0.00467993	0.579117	-0.00808115	17.3198	0.993645	0.998234
ANXA2_HUMAN	P07355	Annexin A2	ANXA2	ANXA2_HUMAN|P07355_K204	G-6599_DMSO_30min	-0.457841	0.262707	-1.74278	22.0969	0.0952732	0.636141
ANXA2_HUMAN	P07355	Annexin A2	ANXA2	ANXA2_HUMAN|P07355_K47	G-6599_DMSO_30min	-0.31629	0.330301	-0.957581	19.785	0.34983	0.811844
ANXA2_HUMAN	P07355	Annexin A2	ANXA2	ANXA2_HUMAN|P07355_K227	G-6599_DMSO_30min	-0.429659	0.263087	-1.63315	22.0782	0.11662	0.659372
ANXA2_HUMAN	P07355	Annexin A2	ANXA2	ANXA2_HUMAN|P07355_K81	G-6599_DMSO_30min	-0.352405	0.310265	-1.13582	20.3023	0.269264	0.768656
ANXA2_HUMAN	P07355	Annexin A2	ANXA2	ANXA2_HUMAN|P07355_K329	G-6599_DMSO_30min	-0.0614618	0.414193	-0.148389	18.4214	0.883648	0.983654
ANXA2_HUMAN	P07355	Annexin A2	ANXA2	ANXA2_HUMAN|P07355_K119	G-6599_DMSO_30min	-0.356421	0.544863	-0.654149	17.4659	0.521537	0.884199
ANXA2_HUMAN	P07355	Annexin A2	ANXA2	ANXA2_HUMAN|P07355_K115	G-6599_DMSO_30min	-0.274849	0.298479	-0.920831	20.6615	0.367766	0.82061
ANXA4_HUMAN	P09525	Annexin A4	ANXA4	ANXA4_HUMAN|P09525_K246	G-6599_DMSO_30min	-0.354025	0.260842	-1.35724	22.5053	0.188162	0.706959
ANXA4_HUMAN	P09525	Annexin A4	ANXA4	ANXA4_HUMAN|P09525_K184	G-6599_DMSO_30min	-0.659627	0.75384	-0.875022	15.8559	0.394624	0.824931
ANXA4_HUMAN	P09525	Annexin A4	ANXA4	ANXA4_HUMAN|P09525_K218	G-6599_DMSO_30min	-0.169058	0.296772	-0.569656	20.9532	0.574968	0.897302
ANXA4_HUMAN	P09525	Annexin A4	ANXA4	ANXA4_HUMAN|P09525_K28	G-6599_DMSO_30min	-0.267485	0.779004	-0.343367	16.8535	0.735568	0.950161
ANXA4_HUMAN	P09525	Annexin A4	ANXA4	ANXA4_HUMAN|P09525_K100	G-6599_DMSO_30min	-0.146904	0.787765	-0.186482	16.8394	0.854295	0.97609
ANXA5_HUMAN	P08758	Annexin A5	ANXA5	ANXA5_HUMAN|P08758_K101	G-6599_DMSO_30min	0.590297	0.436966	1.3509	19.6064	0.192113	0.710683
ANXA5_HUMAN	P08758	Annexin A5	ANXA5	ANXA5_HUMAN|P08758_K86	G-6599_DMSO_30min	0.239853	0.349384	0.686502	23.8172	0.499026	0.871731
ANXA5_HUMAN	P08758	Annexin A5	ANXA5	ANXA5_HUMAN|P08758_K29	G-6599_DMSO_30min	0.0237636	0.394315	0.0602656	22.0412	0.952487	0.993894
ANXA5_HUMAN	P08758	Annexin A5	ANXA5	ANXA5_HUMAN|P08758_K97	G-6599_DMSO_30min	0.111121	0.286599	0.387722	27.763	0.701178	0.940086
ANXA6_HUMAN	P08133	Annexin A6	ANXA6	ANXA6_HUMAN|P08133_K442	G-6599_DMSO_30min	-0.205891	0.268999	-0.765398	19.741	0.453089	0.853715
ANXA6_HUMAN	P08133	Annexin A6	ANXA6	ANXA6_HUMAN|P08133_K135	G-6599_DMSO_30min	-0.00990484	0.336192	-0.0294618	18.4102	0.976813	0.997104
ANXA6_HUMAN	P08133	Annexin A6	ANXA6	ANXA6_HUMAN|P08133_K406	G-6599_DMSO_30min	-0.408879	0.269291	-1.51835	19.7328	0.144786	0.676395
ANXA6_HUMAN	P08133	Annexin A6	ANXA6	ANXA6_HUMAN|P08133_K478	G-6599_DMSO_30min	0.0856954	0.27582	0.310693	19.5562	0.759321	0.955335
ANXA7_HUMAN	P20073	Annexin A7	ANXA7	ANXA7_HUMAN|P20073_K228	G-6599_DMSO_30min	-0.545733	0.310821	-1.75578	18.095	0.0960395	0.636286
AP1B1_HUMAN	Q10567	AP-1 complex subunit beta-1	AP1B1	AP1B1_HUMAN|Q10567_K139	G-6599_DMSO_30min	-0.171894	0.271524	-0.633071	20.2929	0.533757	0.886063
AP1B1_HUMAN	Q10567	AP-1 complex subunit beta-1	AP1B1	AP1B1_HUMAN|Q10567_K728	G-6599_DMSO_30min	-0.529189	0.280262	-1.8882	20.0225	0.0735766	0.608198
AP1G1_HUMAN	O43747	AP-1 complex subunit gamma-1	AP1G1	AP1G1_HUMAN|O43747_K546	G-6599_DMSO_30min	0.678405	0.792317	0.85623	16.6423	0.404031	0.827877
AP1G1_HUMAN	O43747	AP-1 complex subunit gamma-1	AP1G1	AP1G1_HUMAN|O43747_K334	G-6599_DMSO_30min	-0.36071	0.232637	-1.55053	21.5734	0.135562	0.667972
AP1M1_HUMAN	Q9BXS5	AP-1 complex subunit mu-1	AP1M1	AP1M1_HUMAN|Q9BXS5_K229	G-6599_DMSO_30min	0.201921	0.582381	0.346715	17.4411	0.732953	0.94957
AP1S1_HUMAN	P61966	AP-1 complex subunit sigma-1A	AP1S1	AP1S1_HUMAN|P61966_K129_K133	G-6599_DMSO_30min	-0.0429804	0.343666	-0.125065	25.4806	0.901454	0.988612
AP1S1_HUMAN	P61966	AP-1 complex subunit sigma-1A	AP1S1	AP1S1_HUMAN|P61966_K128	G-6599_DMSO_30min	0.731365	0.582598	1.25535	8.5725	0.24249	0.752589
AP2A1_HUMAN	O95782	AP-2 complex subunit alpha-1	AP2A1	AP2A1_HUMAN|O95782_K766	G-6599_DMSO_30min	-0.388887	0.597632	-0.650713	16.8106	0.524027	0.884964
AP2A1_HUMAN	O95782	AP-2 complex subunit alpha-1	AP2A1	AP2A1_HUMAN|O95782_K615	G-6599_DMSO_30min	-0.357642	0.25451	-1.40522	19.664	0.175559	0.700105
AP2B1_HUMAN	P63010	AP-2 complex subunit beta	AP2B1	AP2B1_HUMAN|P63010_K26	G-6599_DMSO_30min	0.156845	0.419406	0.37397	32.128	0.710883	0.943057
AP2B1_HUMAN	P63010	AP-2 complex subunit beta	AP2B1	AP2B1_HUMAN|P63010_K36	G-6599_DMSO_30min	0.245546	0.367192	0.668713	30.1482	0.508767	0.875876
AP2B1_HUMAN	P63010	AP-2 complex subunit beta	AP2B1	AP2B1_HUMAN|P63010_K721	G-6599_DMSO_30min	0.0872585	0.374294	0.233128	30.7852	0.817205	0.966875
AP2B1_HUMAN	P63010	AP-2 complex subunit beta	AP2B1	AP2B1_HUMAN|P63010_K719	G-6599_DMSO_30min	0.0826639	0.376791	0.219389	30.9771	0.827786	0.969177
AP2B1_HUMAN	P63010	AP-2 complex subunit beta	AP2B1	AP2B1_HUMAN|P63010_K147	G-6599_DMSO_30min	0.116489	0.516662	0.225465	28.4779	0.823227	0.968144
AP2M1_HUMAN	Q96CW1	AP-2 complex subunit mu	AP2M1	AP2M1_HUMAN|Q96CW1_K308	G-6599_DMSO_30min	-0.064254	0.236899	-0.271229	18.6614	0.789192	0.962613
AP2M1_HUMAN	Q96CW1	AP-2 complex subunit mu	AP2M1	AP2M1_HUMAN|Q96CW1_K378	G-6599_DMSO_30min	-0.302772	0.62052	-0.487932	16.5662	0.631993	0.918939
AP2M1_HUMAN	Q96CW1	AP-2 complex subunit mu	AP2M1	AP2M1_HUMAN|Q96CW1_K235	G-6599_DMSO_30min	-0.492016	0.254952	-1.92984	18.3115	0.0692668	0.596256
AP2M1_HUMAN	Q96CW1	AP-2 complex subunit mu	AP2M1	AP2M1_HUMAN|Q96CW1_K227	G-6599_DMSO_30min	-0.483103	0.319552	-1.51181	17.5288	0.1484	0.678181
AP2M1_HUMAN	Q96CW1	AP-2 complex subunit mu	AP2M1	AP2M1_HUMAN|Q96CW1_K339	G-6599_DMSO_30min	0.182386	0.250502	0.728083	18.3903	0.475732	0.863122
AP2M1_HUMAN	Q96CW1	AP-2 complex subunit mu	AP2M1	AP2M1_HUMAN|Q96CW1_K312	G-6599_DMSO_30min	-0.299097	0.247056	-1.21064	18.4545	0.241309	0.751501
AP2M1_HUMAN	Q96CW1	AP-2 complex subunit mu	AP2M1	AP2M1_HUMAN|Q96CW1_K224	G-6599_DMSO_30min	-0.286025	0.211813	-1.35036	19.318	0.192508	0.710683
AP2S1_HUMAN	P53680	AP-2 complex subunit sigma	AP2S1	AP2S1_HUMAN|P53680_K130_K133	G-6599_DMSO_30min	-0.395042	0.281385	-1.40392	17.4773	0.177864	0.702264
AP2S1_HUMAN	P53680	AP-2 complex subunit sigma	AP2S1	AP2S1_HUMAN|P53680_K133	G-6599_DMSO_30min	-0.167111	0.53107	-0.314668	16.5722	0.756941	0.955261
AP2S1_HUMAN	P53680	AP-2 complex subunit sigma	AP2S1	AP2S1_HUMAN|P53680_K30	G-6599_DMSO_30min	-0.146647	0.319214	-0.459401	17.1919	0.651702	0.925602
AP3B1_HUMAN	O00203	AP-3 complex subunit beta-1	AP3B1	AP3B1_HUMAN|O00203_K602	G-6599_DMSO_30min	-0.542293	0.260824	-2.07915	19.7756	0.0508358	0.582956
AP3B1_HUMAN	O00203	AP-3 complex subunit beta-1	AP3B1	AP3B1_HUMAN|O00203_K168	G-6599_DMSO_30min	-0.20073	0.234846	-0.854732	20.6847	0.402491	0.827158
AP3B1_HUMAN	O00203	AP-3 complex subunit beta-1	AP3B1	AP3B1_HUMAN|O00203_K549	G-6599_DMSO_30min	-0.482546	0.26039	-1.85317	19.7884	0.0788308	0.619603
AP3B1_HUMAN	O00203	AP-3 complex subunit beta-1	AP3B1	AP3B1_HUMAN|O00203_K289	G-6599_DMSO_30min	-0.269268	0.297668	-0.904594	18.8995	0.377068	0.823239
AP3D1_HUMAN	O14617	AP-3 complex subunit delta-1	AP3D1	AP3D1_HUMAN|O14617_K584	G-6599_DMSO_30min	0.138872	0.355782	0.390329	17.4738	0.701011	0.940086
AP3D1_HUMAN	O14617	AP-3 complex subunit delta-1	AP3D1	AP3D1_HUMAN|O14617_K673	G-6599_DMSO_30min	-0.148353	0.244392	-0.60703	18.9655	0.55103	0.889686
AP3S1_HUMAN	Q92572	AP-3 complex subunit sigma-1	AP3S1	AP3S1_HUMAN|Q92572_K13	G-6599_DMSO_30min	-0.0351223	0.260385	-0.134886	20.325	0.894029	0.986529
AP3S1_HUMAN	Q92572	AP-3 complex subunit sigma-1	AP3S1	AP3S1_HUMAN|Q92572_K193	G-6599_DMSO_30min	-0.464429	0.258483	-1.79674	20.3909	0.0872062	0.627641
AP3S1_HUMAN	Q92572	AP-3 complex subunit sigma-1	AP3S1	AP3S1_HUMAN|Q92572_K166	G-6599_DMSO_30min	-0.473497	0.245572	-1.92814	20.8841	0.0675447	0.595947
AP3S2_HUMAN	P59780	AP-3 complex subunit sigma-2	AP3S2	AP3S2_HUMAN|P59780_K166	G-6599_DMSO_30min	-0.176072	0.355287	-0.495575	23.1209	0.624872	0.915696
AP3S2_HUMAN	P59780	AP-3 complex subunit sigma-2	AP3S2	AP3S2_HUMAN|P59780_K13	G-6599_DMSO_30min	-0.00634944	0.319275	-0.019887	24.9372	0.984292	0.997403
AP3S2_HUMAN	P59780	AP-3 complex subunit sigma-2	AP3S2	AP3S2_HUMAN|P59780_K41	G-6599_DMSO_30min	-0.132641	0.282453	-0.469603	27.4834	0.642343	0.922083
AP4B1_HUMAN	Q9Y6B7	AP-4 complex subunit beta-1	AP4B1	AP4B1_HUMAN|Q9Y6B7_K278	G-6599_DMSO_30min	-0.133816	0.208981	-0.640325	18.8046	0.529687	0.886063
AP4M1_HUMAN	O00189	AP-4 complex subunit mu-1	AP4M1	AP4M1_HUMAN|O00189_K184	G-6599_DMSO_30min	-0.158448	0.290498	-0.545436	17.9613	0.592163	0.905892
AP5B1_HUMAN	Q2VPB7	AP-5 complex subunit beta-1	AP5B1	AP5B1_HUMAN|Q2VPB7_K674	G-6599_DMSO_30min	-0.249329	0.2441	-1.02142	22.6825	0.317827	0.796872
APBB1_HUMAN	O00213	Amyloid beta A4 precursor protein-binding family B member 1	APBB1	APBB1_HUMAN|O00213_K48	G-6599_DMSO_30min	-0.29911	0.356113	-0.839931	21.9207	0.410015	0.830249
APBB2_HUMAN	Q92870	Amyloid beta A4 precursor protein-binding family B member 2	APBB2	APBB2_HUMAN|Q92870_K159	G-6599_DMSO_30min	-0.48479	0.421243	-1.15086	26.7168	0.259988	0.761814
APBB2_HUMAN	Q92870	Amyloid beta A4 precursor protein-binding family B member 2	APBB2	APBB2_HUMAN|Q92870_K242	G-6599_DMSO_30min	-0.512738	0.33135	-1.54742	31.7124	0.131685	0.667972
APBP2_HUMAN	Q92624	Amyloid protein-binding protein 2	APPBP2	APBP2_HUMAN|Q92624_K522	G-6599_DMSO_30min	-0.14583	0.215778	-0.675832	19.1022	0.507248	0.875803
APBP2_HUMAN	Q92624	Amyloid protein-binding protein 2	APPBP2	APBP2_HUMAN|Q92624_K379	G-6599_DMSO_30min	-0.04891	0.23095	-0.211777	18.7147	0.83457	0.970813
APC_HUMAN	P25054	Adenomatous polyposis coli protein	APC	APC_HUMAN|P25054_K1686	G-6599_DMSO_30min	-0.709536	0.342282	-2.07296	20.3744	0.0510654	0.582956
APC_HUMAN	P25054	Adenomatous polyposis coli protein	APC	APC_HUMAN|P25054_K1593	G-6599_DMSO_30min	0.041517	0.409578	0.101365	19.0428	0.92032	0.991061
APC_HUMAN	P25054	Adenomatous polyposis coli protein	APC	APC_HUMAN|P25054_K1592	G-6599_DMSO_30min	-0.104427	0.355165	-0.294024	20.0543	0.771761	0.959236
APC1_HUMAN	Q9H1A4	Anaphase-promoting complex subunit 1	ANAPC1	APC1_HUMAN|Q9H1A4_K905	G-6599_DMSO_30min	0.154659	0.542295	0.285194	17.0708	0.778927	0.959773
APC1_HUMAN	Q9H1A4	Anaphase-promoting complex subunit 1	ANAPC1	APC1_HUMAN|Q9H1A4_K1709	G-6599_DMSO_30min	-0.154818	0.397757	-0.389228	17.8241	0.701718	0.94014
APC10_HUMAN	Q9UM13	Anaphase-promoting complex subunit 10	ANAPC10	APC10_HUMAN|Q9UM13_K169	G-6599_DMSO_30min	-0.132296	0.327943	-0.403412	18.1795	0.69135	0.938143
APC16_HUMAN	Q96DE5	Anaphase-promoting complex subunit 16	ANAPC16	APC16_HUMAN|Q96DE5_K33	G-6599_DMSO_30min	-0.377208	0.296006	-1.27433	17.793	0.218941	0.733978
APC4_HUMAN	Q9UJX5	Anaphase-promoting complex subunit 4	ANAPC4	APC4_HUMAN|Q9UJX5_K331	G-6599_DMSO_30min	-0.220479	0.266235	-0.828137	19.5501	0.417588	0.834269
APC4_HUMAN	Q9UJX5	Anaphase-promoting complex subunit 4	ANAPC4	APC4_HUMAN|Q9UJX5_K328	G-6599_DMSO_30min	-0.271676	0.331187	-0.820309	18.3148	0.422588	0.837779
APC5_HUMAN	Q9UJX4	Anaphase-promoting complex subunit 5	ANAPC5	APC5_HUMAN|Q9UJX4_K289	G-6599_DMSO_30min	-0.219471	0.273459	-0.802572	17.9906	0.432697	0.843627
APC5_HUMAN	Q9UJX4	Anaphase-promoting complex subunit 5	ANAPC5	APC5_HUMAN|Q9UJX4_K224	G-6599_DMSO_30min	0.0145739	0.346477	0.0420631	17.3074	0.96693	0.995716
APC5_HUMAN	Q9UJX4	Anaphase-promoting complex subunit 5	ANAPC5	APC5_HUMAN|Q9UJX4_K229	G-6599_DMSO_30min	-0.434183	0.236641	-1.83478	18.6178	0.0825691	0.623906
APC5_HUMAN	Q9UJX4-3	Anaphase-promoting complex subunit 5 (isoform 3)	ANAPC5	APC5_HUMAN|Q9UJX4-3_K268	G-6599_DMSO_30min	-0.0940616	0.222422	-0.422897	18.9544	0.67713	0.933585
APC7_HUMAN	Q9UJX3	Anaphase-promoting complex subunit 7	ANAPC7	APC7_HUMAN|Q9UJX3_K263	G-6599_DMSO_30min	-0.0841121	0.210318	-0.399928	19.0782	0.693652	0.938143
APC7_HUMAN	Q9UJX3	Anaphase-promoting complex subunit 7	ANAPC7	APC7_HUMAN|Q9UJX3_K288	G-6599_DMSO_30min	-0.108048	0.233611	-0.462513	18.5077	0.649105	0.924622
APC7_HUMAN	Q9UJX3	Anaphase-promoting complex subunit 7	ANAPC7	APC7_HUMAN|Q9UJX3_K180	G-6599_DMSO_30min	-0.190867	0.255072	-0.748287	18.1225	0.463888	0.85814
APEX1_HUMAN	P27695	DNA-(apurinic or apyrimidinic site) lyase	APEX1	APEX1_HUMAN|P27695_K299	G-6599_DMSO_30min	-0.294139	0.309913	-0.949102	17.6997	0.355349	0.815008
APEX2_HUMAN	Q9UBZ4	DNA-(apurinic or apyrimidinic site) lyase 2	APEX2	APEX2_HUMAN|Q9UBZ4_K338	G-6599_DMSO_30min	-0.172903	0.3668	-0.471382	20.0972	0.642445	0.922083
API5_HUMAN	Q9BZZ5	Apoptosis inhibitor 5	API5	API5_HUMAN|Q9BZZ5_K160	G-6599_DMSO_30min	-0.107799	0.3026	-0.356242	19.1553	0.725553	0.946995
API5_HUMAN	Q9BZZ5	Apoptosis inhibitor 5	API5	API5_HUMAN|Q9BZZ5_K169	G-6599_DMSO_30min	-0.52526	0.279287	-1.88072	19.7061	0.0748727	0.613647
APLP2_HUMAN	Q06481	Amyloid-like protein 2	APLP2	APLP2_HUMAN|Q06481_K756	G-6599_DMSO_30min	-0.112003	0.338185	-0.331188	18.2558	0.744274	0.953513
APLP2_HUMAN	Q06481	Amyloid-like protein 2	APLP2	APLP2_HUMAN|Q06481_K332	G-6599_DMSO_30min	-0.383331	0.255635	-1.49953	19.9125	0.149426	0.679288
APMAP_HUMAN	Q9HDC9	Adipocyte plasma membrane-associated protein	APMAP	APMAP_HUMAN|Q9HDC9_K123	G-6599_DMSO_30min	-0.669728	0.993816	-0.673895	15.8076	0.510113	0.875983
APOL2_HUMAN	Q9BQE5	Apolipoprotein L2	APOL2	APOL2_HUMAN|Q9BQE5_K193	G-6599_DMSO_30min	-0.290419	0.264244	-1.09906	22.5452	0.283343	0.780019
APOL2_HUMAN	Q9BQE5	Apolipoprotein L2	APOL2	APOL2_HUMAN|Q9BQE5_K320	G-6599_DMSO_30min	0.0221444	0.316008	0.0700756	20.4919	0.944813	0.992029
AR2BP_HUMAN	Q9Y2Y0	ADP-ribosylation factor-like protein 2-binding protein	ARL2BP	AR2BP_HUMAN|Q9Y2Y0_K150	G-6599_DMSO_30min	-0.572575	0.395193	-1.44885	19.8844	0.162967	0.69168
AR6P1_HUMAN	Q15041	ADP-ribosylation factor-like protein 6-interacting protein 1	ARL6IP1	AR6P1_HUMAN|Q15041_K96	G-6599_DMSO_30min	-0.783989	0.236183	-3.31942	21.79	0.00314387	0.328392
ARC1A_HUMAN	Q92747	Actin-related protein 2/3 complex subunit 1A	ARPC1A	ARC1A_HUMAN|Q92747_K285	G-6599_DMSO_30min	-0.0461194	0.283401	-0.162736	19.8824	0.872369	0.980322
ARC1A_HUMAN	Q92747	Actin-related protein 2/3 complex subunit 1A	ARPC1A	ARC1A_HUMAN|Q92747_K342	G-6599_DMSO_30min	0.0323217	0.580666	0.0556632	17.0422	0.956258	0.994127
ARC1B_HUMAN	O15143	Actin-related protein 2/3 complex subunit 1B	ARPC1B	ARC1B_HUMAN|O15143_K339	G-6599_DMSO_30min	-0.539858	0.408528	-1.32147	27.1761	0.197362	0.714483
ARF1_HUMAN	P84077	ADP-ribosylation factor 1	ARF1	ARF1_HUMAN|P84077_K142	G-6599_DMSO_30min	0.0491378	0.345851	0.142078	18.0909	0.888589	0.984477
ARF1_HUMAN	P84077	ADP-ribosylation factor 1	ARF1	ARF1_HUMAN|P84077_K127	G-6599_DMSO_30min	0.291607	0.374158	0.779369	17.8086	0.445997	0.852301
ARF1_HUMAN	P84077	ADP-ribosylation factor 1	ARF1	ARF1_HUMAN|P84077_K36	G-6599_DMSO_30min	0.0717144	0.274077	0.261658	19.2782	0.79636	0.964
ARF1_HUMAN	P84077	ADP-ribosylation factor 1	ARF1	ARF1_HUMAN|P84077_K73	G-6599_DMSO_30min	-0.301796	0.409832	-0.736388	17.5365	0.471231	0.861966
ARF4_HUMAN	P18085	ADP-ribosylation factor 4	ARF4	ARF4_HUMAN|P18085_K127	G-6599_DMSO_30min	0.299717	0.47636	0.629183	19.0507	0.536702	0.886063
ARF5_HUMAN	P84085	ADP-ribosylation factor 5	ARF5	ARF5_HUMAN|P84085_K142	G-6599_DMSO_30min	-0.026996	0.374863	-0.0720155	18.2026	0.943375	0.992029
ARF6_HUMAN	P62330	ADP-ribosylation factor 6	ARF6	ARF6_HUMAN|P62330_K55	G-6599_DMSO_30min	-0.454764	0.338396	-1.34388	17.9875	0.195693	0.714382
ARF6_HUMAN	P62330	ADP-ribosylation factor 6	ARF6	ARF6_HUMAN|P62330_K34_K55	G-6599_DMSO_30min	-0.61035	0.365911	-1.66803	17.723	0.112881	0.652347
ARF6_HUMAN	P62330	ADP-ribosylation factor 6	ARF6	ARF6_HUMAN|P62330_K7	G-6599_DMSO_30min	-0.407698	0.262661	-1.55218	19.2358	0.136916	0.668844
ARFP1_HUMAN	P53367	Arfaptin-1	ARFIP1	ARFP1_HUMAN|P53367_K353	G-6599_DMSO_30min	-0.286437	0.287712	-0.995567	18.3838	0.332385	0.804037
ARHG8_HUMAN	Q7Z628	Neuroepithelial cell-transforming gene 1 protein	NET1	ARHG8_HUMAN|Q7Z628_K385	G-6599_DMSO_30min	-0.155437	0.243815	-0.63752	18.9656	0.531408	0.886063
ARHGA_HUMAN	O15013	Rho guanine nucleotide exchange factor 10	ARHGEF10	ARHGA_HUMAN|O15013_K818	G-6599_DMSO_30min	-0.265267	0.265682	-0.998437	19.4563	0.330324	0.803256
ARI1_HUMAN	Q9Y4X5	E3 ubiquitin-protein ligase ARIH1	ARIH1	ARI1_HUMAN|Q9Y4X5_K257	G-6599_DMSO_30min	-0.363784	0.253558	-1.43472	18.8588	0.167744	0.695177
ARI1_HUMAN	Q9Y4X5	E3 ubiquitin-protein ligase ARIH1	ARIH1	ARI1_HUMAN|Q9Y4X5_K168	G-6599_DMSO_30min	-0.483973	0.257568	-1.87901	18.7724	0.075861	0.616877
ARI1_HUMAN	Q9Y4X5	E3 ubiquitin-protein ligase ARIH1	ARIH1	ARI1_HUMAN|Q9Y4X5_K316	G-6599_DMSO_30min	-0.0846221	0.27844	-0.303915	18.3853	0.764605	0.957719
ARI1_HUMAN	Q9Y4X5	E3 ubiquitin-protein ligase ARIH1	ARIH1	ARI1_HUMAN|Q9Y4X5_K293	G-6599_DMSO_30min	-0.40638	0.242774	-1.6739	19.1145	0.110435	0.650599
ARI1_HUMAN	Q9Y4X5	E3 ubiquitin-protein ligase ARIH1	ARIH1	ARI1_HUMAN|Q9Y4X5_K274	G-6599_DMSO_30min	-0.400955	0.254478	-1.5756	18.8386	0.131763	0.667972
ARI1_HUMAN	Q9Y4X5	E3 ubiquitin-protein ligase ARIH1	ARIH1	ARI1_HUMAN|Q9Y4X5_K142	G-6599_DMSO_30min	-0.384233	0.278248	-1.3809	18.3885	0.183864	0.706847
ARI1_HUMAN	Q9Y4X5	E3 ubiquitin-protein ligase ARIH1	ARIH1	ARI1_HUMAN|Q9Y4X5_K522	G-6599_DMSO_30min	-0.315743	0.268263	-1.17699	18.562	0.254072	0.759489
ARI1_HUMAN	Q9Y4X5	E3 ubiquitin-protein ligase ARIH1	ARIH1	ARI1_HUMAN|Q9Y4X5_K439	G-6599_DMSO_30min	-0.57644	0.247884	-2.32544	18.9888	0.0312827	0.545928
ARI1A_HUMAN	O14497	AT-rich interactive domain-containing protein 1A	ARID1A	ARI1A_HUMAN|O14497_K2243	G-6599_DMSO_30min	0.361741	0.558292	0.647943	16.6987	0.525831	0.885732
ARI1A_HUMAN	O14497	AT-rich interactive domain-containing protein 1A	ARID1A	ARI1A_HUMAN|O14497_K1093	G-6599_DMSO_30min	-0.367353	0.337856	-1.08731	17.538	0.291619	0.786865
ARI2_HUMAN	O95376	E3 ubiquitin-protein ligase ARIH2	ARIH2	ARI2_HUMAN|O95376_K110	G-6599_DMSO_30min	-0.448257	0.261586	-1.71361	20.0744	0.102001	0.642188
ARI2_HUMAN	O95376	E3 ubiquitin-protein ligase ARIH2	ARIH2	ARI2_HUMAN|O95376_K377	G-6599_DMSO_30min	-0.487785	0.266694	-1.82901	19.9164	0.0824135	0.623906
ARID2_HUMAN	Q68CP9	AT-rich interactive domain-containing protein 2	ARID2	ARID2_HUMAN|Q68CP9_K1777	G-6599_DMSO_30min	-0.121887	0.292397	-0.416854	19.5348	0.68133	0.933951
ARID2_HUMAN	Q68CP9	AT-rich interactive domain-containing protein 2	ARID2	ARID2_HUMAN|Q68CP9_K1766	G-6599_DMSO_30min	-0.200576	0.249084	-0.805256	20.9132	0.429733	0.841881
ARIP4_HUMAN	Q9Y4B4	Helicase ARIP4	RAD54L2	ARIP4_HUMAN|Q9Y4B4_K923	G-6599_DMSO_30min	-0.831919	0.313008	-2.65782	17.9335	0.0160561	0.509558
ARL2_HUMAN	P36404	ADP-ribosylation factor-like protein 2	ARL2	ARL2_HUMAN|P36404_K61	G-6599_DMSO_30min	-0.0904988	0.255707	-0.353916	20.033	0.7271	0.947898
ARL2_HUMAN	P36404	ADP-ribosylation factor-like protein 2	ARL2	ARL2_HUMAN|P36404_K71	G-6599_DMSO_30min	-0.607319	0.269973	-2.24956	19.6113	0.0361335	0.553837
ARL4C_HUMAN	P56559	ADP-ribosylation factor-like protein 4C	ARL4C	ARL4C_HUMAN|P56559_K34	G-6599_DMSO_30min	-0.116249	0.31894	-0.364486	20.5474	0.719219	0.945518
ARL4C_HUMAN	P56559	ADP-ribosylation factor-like protein 4C	ARL4C	ARL4C_HUMAN|P56559_K113	G-6599_DMSO_30min	-0.544653	0.254904	-2.1367	23.2995	0.0433414	0.559726
ARL4C_HUMAN	P56559	ADP-ribosylation factor-like protein 4C	ARL4C	ARL4C_HUMAN|P56559_K128	G-6599_DMSO_30min	-0.454391	0.296214	-1.534	21.3067	0.139747	0.673346
ARL4C_HUMAN	P56559	ADP-ribosylation factor-like protein 4C	ARL4C	ARL4C_HUMAN|P56559_K53	G-6599_DMSO_30min	-0.543198	0.293802	-1.84886	21.3988	0.0783434	0.619603
ARL4D_HUMAN	P49703	ADP-ribosylation factor-like protein 4D	ARL4D	ARL4D_HUMAN|P49703_K44	G-6599_DMSO_30min	-0.432412	0.245789	-1.75928	22.669	0.0920215	0.635772
ARL4D_HUMAN	P49703	ADP-ribosylation factor-like protein 4D	ARL4D	ARL4D_HUMAN|P49703_K150	G-6599_DMSO_30min	-0.184397	0.739072	-0.249498	16.8596	0.80599	0.965351
ARL4D_HUMAN	P49703	ADP-ribosylation factor-like protein 4D	ARL4D	ARL4D_HUMAN|P49703_K53	G-6599_DMSO_30min	-0.846347	0.305524	-2.77015	20.2233	0.0117314	0.474948
ARL8A_HUMAN	Q96BM9	ADP-ribosylation factor-like protein 8A	ARL8A	ARL8A_HUMAN|Q96BM9_K146	G-6599_DMSO_30min	0.54967	0.674674	0.81472	16.5191	0.426823	0.840035
ARL8A_HUMAN	Q96BM9	ADP-ribosylation factor-like protein 8A	ARL8A	ARL8A_HUMAN|Q96BM9_K141	G-6599_DMSO_30min	-0.0827287	0.45399	-0.182226	16.8735	0.857577	0.976159
ARL8B_HUMAN	Q9NVJ2	ADP-ribosylation factor-like protein 8B	ARL8B	ARL8B_HUMAN|Q9NVJ2_K141	G-6599_DMSO_30min	-0.25086	0.402769	-0.622838	17.4478	0.541447	0.887795
ARL8B_HUMAN	Q9NVJ2	ADP-ribosylation factor-like protein 8B	ARL8B	ARL8B_HUMAN|Q9NVJ2_K62	G-6599_DMSO_30min	0.0444687	0.266184	0.16706	19.1368	0.869075	0.979828
ARLY_HUMAN	P04424	Argininosuccinate lyase	ASL	ARLY_HUMAN|P04424_K106	G-6599_DMSO_30min	0.248659	0.248813	0.999384	18.6375	0.330408	0.803256
ARLY_HUMAN	P04424	Argininosuccinate lyase	ASL	ARLY_HUMAN|P04424_K51	G-6599_DMSO_30min	0.202719	0.234322	0.865133	18.9656	0.397777	0.824993
ARM10_HUMAN	Q8N2F6	Armadillo repeat-containing protein 10	ARMC10	ARM10_HUMAN|Q8N2F6_K335	G-6599_DMSO_30min	-0.00960312	0.301024	-0.0319015	24.1346	0.974813	0.997104
ARMC1_HUMAN	Q9NVT9	Armadillo repeat-containing protein 1	ARMC1	ARMC1_HUMAN|Q9NVT9_K192	G-6599_DMSO_30min	-0.27845	0.318355	-0.874652	21.19	0.391569	0.824931
ARMC1_HUMAN	Q9NVT9	Armadillo repeat-containing protein 1	ARMC1	ARMC1_HUMAN|Q9NVT9_K167	G-6599_DMSO_30min	-0.253187	0.367915	-0.688169	19.8473	0.499311	0.871898
ARMC1_HUMAN	Q9NVT9	Armadillo repeat-containing protein 1	ARMC1	ARMC1_HUMAN|Q9NVT9_K130	G-6599_DMSO_30min	-0.456945	0.325782	-1.40261	20.9452	0.175383	0.700105
ARMC6_HUMAN	Q6NXE6	Armadillo repeat-containing protein 6	ARMC6	ARMC6_HUMAN|Q6NXE6_K277	G-6599_DMSO_30min	-0.266398	0.32354	-0.823384	17.5543	0.421336	0.836483
ARMC6_HUMAN	Q6NXE6	Armadillo repeat-containing protein 6	ARMC6	ARMC6_HUMAN|Q6NXE6_K427	G-6599_DMSO_30min	-0.229506	0.308766	-0.7433	17.6891	0.467058	0.858967
ARMC8_HUMAN	Q8IUR7	Armadillo repeat-containing protein 8	ARMC8	ARMC8_HUMAN|Q8IUR7_K399	G-6599_DMSO_30min	0.127065	0.272643	0.46605	27.1187	0.644901	0.922459
ARMC8_HUMAN	Q8IUR7	Armadillo repeat-containing protein 8	ARMC8	ARMC8_HUMAN|Q8IUR7_K345	G-6599_DMSO_30min	0.0359624	0.300192	0.119798	25.1251	0.905596	0.988943
ARMC9_HUMAN	Q7Z3E5	LisH domain-containing protein ARMC9	ARMC9	ARMC9_HUMAN|Q7Z3E5_K306	G-6599_DMSO_30min	-0.0178064	0.271026	-0.0657001	18.6051	0.948317	0.992817
ARMD3_HUMAN	Q5T2E6	NA	NA	ARMD3_HUMAN|Q5T2E6_K635	G-6599_DMSO_30min	0.0631775	0.311308	0.202942	18.0192	0.841454	0.973201
ARMX3_HUMAN	Q9UH62	Armadillo repeat-containing X-linked protein 3	ARMCX3	ARMX3_HUMAN|Q9UH62_K260	G-6599_DMSO_30min	0.126384	0.294747	0.428788	19.1482	0.672862	0.931629
ARP2_HUMAN	P61160	Actin-related protein 2	ACTR2	ARP2_HUMAN|P61160_K46	G-6599_DMSO_30min	-0.654782	0.270504	-2.4206	17.7283	0.0264685	0.545928
ARP2_HUMAN	P61160	Actin-related protein 2	ACTR2	ARP2_HUMAN|P61160_K7	G-6599_DMSO_30min	-0.2801	0.250873	-1.1165	17.9833	0.278903	0.777343
ARP2_HUMAN	P61160	Actin-related protein 2	ACTR2	ARP2_HUMAN|P61160_K118	G-6599_DMSO_30min	-0.471304	0.26848	-1.75546	17.7519	0.0964218	0.636286
ARP2_HUMAN	P61160	Actin-related protein 2	ACTR2	ARP2_HUMAN|P61160_K336	G-6599_DMSO_30min	-0.768446	0.301409	-2.54951	17.4273	0.0204605	0.529953
ARP2_HUMAN	P61160	Actin-related protein 2	ACTR2	ARP2_HUMAN|P61160_K331	G-6599_DMSO_30min	-0.373316	0.306262	-1.21894	17.3885	0.239144	0.748838
ARP2_HUMAN	P61160	Actin-related protein 2	ACTR2	ARP2_HUMAN|P61160_K299	G-6599_DMSO_30min	-0.438022	0.249286	-1.75711	18.0068	0.0958893	0.636286
ARP2_HUMAN	P61160	Actin-related protein 2	ACTR2	ARP2_HUMAN|P61160_K106	G-6599_DMSO_30min	-0.235735	0.227712	-1.03524	18.3793	0.313988	0.795929
ARP3_HUMAN	P61158	Actin-related protein 3	ACTR3	ARP3_HUMAN|P61158_K348	G-6599_DMSO_30min	-0.131071	0.372512	-0.351856	22.8787	0.728166	0.947898
ARP3_HUMAN	P61158	Actin-related protein 3	ACTR3	ARP3_HUMAN|P61158_K38	G-6599_DMSO_30min	-0.0566366	0.386263	-0.146627	22.3675	0.88474	0.983654
ARP3_HUMAN	P61158	Actin-related protein 3	ACTR3	ARP3_HUMAN|P61158_K53_K69	G-6599_DMSO_30min	-0.147307	0.338699	-0.434921	24.4244	0.667438	0.929231
ARP3_HUMAN	P61158	Actin-related protein 3	ACTR3	ARP3_HUMAN|P61158_K264	G-6599_DMSO_30min	-0.0341383	0.293673	-0.116246	27.3083	0.908308	0.988943
ARP5_HUMAN	Q9H9F9	Actin-related protein 5	ACTR5	ARP5_HUMAN|Q9H9F9_K283	G-6599_DMSO_30min	-0.716784	0.365278	-1.9623	17.3027	0.0660162	0.595573
ARP5L_HUMAN	Q9BPX5	Actin-related protein 2/3 complex subunit 5-like protein	ARPC5L	ARP5L_HUMAN|Q9BPX5_K110	G-6599_DMSO_30min	-0.256977	0.344767	-0.745365	17.4917	0.46595	0.858835
ARP6_HUMAN	Q9GZN1	Actin-related protein 6	ACTR6	ARP6_HUMAN|Q9GZN1_K178	G-6599_DMSO_30min	-0.230026	0.300233	-0.766156	19.9291	0.452563	0.853715
ARP8_HUMAN	Q9H981	Actin-related protein 8	ACTR8	ARP8_HUMAN|Q9H981_K498	G-6599_DMSO_30min	-0.308096	0.230273	-1.33796	18.0821	0.197495	0.714483
ARP8_HUMAN	Q9H981	Actin-related protein 8	ACTR8	ARP8_HUMAN|Q9H981_K80	G-6599_DMSO_30min	0.0715468	0.480756	0.148821	16.6394	0.883483	0.983654
ARPC3_HUMAN	O15145	Actin-related protein 2/3 complex subunit 3	ARPC3	ARPC3_HUMAN|O15145_K147	G-6599_DMSO_30min	0.162195	0.271948	0.59642	18.8448	0.557992	0.891146
ARPC3_HUMAN	O15145	Actin-related protein 2/3 complex subunit 3	ARPC3	ARPC3_HUMAN|O15145_K171	G-6599_DMSO_30min	-0.4687	0.286624	-1.63524	18.5685	0.118837	0.661555
ARPC3_HUMAN	O15145	Actin-related protein 2/3 complex subunit 3	ARPC3	ARPC3_HUMAN|O15145_K56	G-6599_DMSO_30min	-0.144153	0.243989	-0.590819	19.5292	0.561418	0.893138
ARPC3_HUMAN	O15145	Actin-related protein 2/3 complex subunit 3	ARPC3	ARPC3_HUMAN|O15145_K84	G-6599_DMSO_30min	-0.0399737	0.273403	-0.146208	18.8153	0.885312	0.983932
ARRB2_HUMAN	P32121	Beta-arrestin-2	ARRB2	ARRB2_HUMAN|P32121_K158	G-6599_DMSO_30min	-0.450334	0.257691	-1.74758	20.6883	0.0953657	0.636141
ARV1_HUMAN	Q9H2C2	Protein ARV1	ARV1	ARV1_HUMAN|Q9H2C2_K13	G-6599_DMSO_30min	-0.638301	0.275217	-2.31927	24.1279	0.0291626	0.545928
ASB1_HUMAN	Q9Y576	Ankyrin repeat and SOCS box protein 1	ASB1	ASB1_HUMAN|Q9Y576_K69	G-6599_DMSO_30min	-0.337241	0.320263	-1.05301	17.9306	0.306319	0.793269
ASB4_HUMAN	Q9Y574	Ankyrin repeat and SOCS box protein 4	ASB4	ASB4_HUMAN|Q9Y574_K242	G-6599_DMSO_30min	-0.0579546	0.279891	-0.207061	18.1626	0.838266	0.972651
ASB4_HUMAN	Q9Y574	Ankyrin repeat and SOCS box protein 4	ASB4	ASB4_HUMAN|Q9Y574_K326	G-6599_DMSO_30min	-0.346816	0.250333	-1.38542	18.6765	0.182249	0.7048
ASB4_HUMAN	Q9Y574	Ankyrin repeat and SOCS box protein 4	ASB4	ASB4_HUMAN|Q9Y574_K336	G-6599_DMSO_30min	-0.113633	0.309413	-0.367254	17.7968	0.717761	0.944983
ASB4_HUMAN	Q9Y574	Ankyrin repeat and SOCS box protein 4	ASB4	ASB4_HUMAN|Q9Y574_K124	G-6599_DMSO_30min	-0.275319	0.458393	-0.600617	16.9278	0.556052	0.890924
ASB4_HUMAN	Q9Y574	Ankyrin repeat and SOCS box protein 4	ASB4	ASB4_HUMAN|Q9Y574_K70	G-6599_DMSO_30min	-0.162029	0.251739	-0.643638	18.6476	0.527647	0.886063
ASB6_HUMAN	Q9NWX5	Ankyrin repeat and SOCS box protein 6	ASB6	ASB6_HUMAN|Q9NWX5_K376	G-6599_DMSO_30min	-0.118219	0.27745	-0.426092	22.0504	0.674171	0.932282
ASCC1_HUMAN	Q8N9N2	Activating signal cointegrator 1 complex subunit 1	ASCC1	ASCC1_HUMAN|Q8N9N2_K331	G-6599_DMSO_30min	-0.187528	0.245326	-0.764405	20.421	0.453369	0.853715
ASCC3_HUMAN	Q8N3C0	Activating signal cointegrator 1 complex subunit 3	ASCC3	ASCC3_HUMAN|Q8N3C0_K213	G-6599_DMSO_30min	-0.51187	0.369832	-1.38406	17.1167	0.184123	0.706847
ASCC3_HUMAN	Q8N3C0	Activating signal cointegrator 1 complex subunit 3	ASCC3	ASCC3_HUMAN|Q8N3C0_K938	G-6599_DMSO_30min	-0.340244	0.260897	-1.30413	18.056	0.208569	0.726559
ASCC3_HUMAN	Q8N3C0	Activating signal cointegrator 1 complex subunit 3	ASCC3	ASCC3_HUMAN|Q8N3C0_K197	G-6599_DMSO_30min	-0.659099	0.317929	-2.07311	17.4402	0.0532752	0.588128
ASF1A_HUMAN	Q9Y294	Histone chaperone ASF1A	ASF1A	ASF1A_HUMAN|Q9Y294_K129	G-6599_DMSO_30min	-0.353213	0.341282	-1.03496	17.866	0.314494	0.796127
ASH2L_HUMAN	Q9UBL3	Set1/Ash2 histone methyltransferase complex subunit ASH2	ASH2L	ASH2L_HUMAN|Q9UBL3_K515	G-6599_DMSO_30min	0.0397977	0.493761	0.0806011	16.6225	0.936722	0.991158
ASNS_HUMAN	P08243	Asparagine synthetase [glutamine-hydrolyzing]	ASNS	ASNS_HUMAN|P08243_K168	G-6599_DMSO_30min	-0.0412057	0.304213	-0.13545	20.0417	0.893607	0.986529
ASNS_HUMAN	P08243	Asparagine synthetase [glutamine-hydrolyzing]	ASNS	ASNS_HUMAN|P08243_K244	G-6599_DMSO_30min	0.106824	0.27003	0.395601	21.1753	0.696357	0.938454
ASNS_HUMAN	P08243	Asparagine synthetase [glutamine-hydrolyzing]	ASNS	ASNS_HUMAN|P08243_K191	G-6599_DMSO_30min	-0.0672612	0.285703	-0.235424	20.6002	0.816205	0.966647
ASNS_HUMAN	P08243	Asparagine synthetase [glutamine-hydrolyzing]	ASNS	ASNS_HUMAN|P08243_K275	G-6599_DMSO_30min	0.327933	0.470752	0.696616	17.7385	0.495071	0.870307
ASNS_HUMAN	P08243	Asparagine synthetase [glutamine-hydrolyzing]	ASNS	ASNS_HUMAN|P08243_K203	G-6599_DMSO_30min	-0.0361464	0.267744	-0.135004	21.2685	0.893878	0.986529
ASNS_HUMAN	P08243	Asparagine synthetase [glutamine-hydrolyzing]	ASNS	ASNS_HUMAN|P08243_K504	G-6599_DMSO_30min	0.371228	0.49468	0.75044	17.5909	0.46291	0.85814
ASNS_HUMAN	P08243	Asparagine synthetase [glutamine-hydrolyzing]	ASNS	ASNS_HUMAN|P08243_K478	G-6599_DMSO_30min	-0.0339887	0.346489	-0.0980946	19.1092	0.922879	0.991061
ASPH_HUMAN	Q12797	Aspartyl/asparaginyl beta-hydroxylase	ASPH	ASPH_HUMAN|Q12797_K420	G-6599_DMSO_30min	-0.208644	0.688538	-0.303025	18.4705	0.765257	0.957719
ASPH_HUMAN	Q12797	Aspartyl/asparaginyl beta-hydroxylase	ASPH	ASPH_HUMAN|Q12797_K8	G-6599_DMSO_30min	-0.535789	0.307563	-1.74205	28.8206	0.0921648	0.635772
ASPH_HUMAN	Q12797	Aspartyl/asparaginyl beta-hydroxylase	ASPH	ASPH_HUMAN|Q12797_K503	G-6599_DMSO_30min	-0.326209	0.334963	-0.973864	26.8952	0.338802	0.806466
ASPH_HUMAN	Q12797	Aspartyl/asparaginyl beta-hydroxylase	ASPH	ASPH_HUMAN|Q12797_K609	G-6599_DMSO_30min	-0.0753277	0.605864	-0.124331	19.1718	0.902347	0.98864
ASPM_HUMAN	Q8IZT6	Abnormal spindle-like microcephaly-associated protein	ASPM	ASPM_HUMAN|Q8IZT6_K2019	G-6599_DMSO_30min	-0.352816	0.374863	-0.941185	17.4517	0.359457	0.816438
ASPM_HUMAN	Q8IZT6	Abnormal spindle-like microcephaly-associated protein	ASPM	ASPM_HUMAN|Q8IZT6_K3364	G-6599_DMSO_30min	-0.216824	0.289579	-0.748756	18.3233	0.463508	0.85814
ASPM_HUMAN	Q8IZT6	Abnormal spindle-like microcephaly-associated protein	ASPM	ASPM_HUMAN|Q8IZT6_K177	G-6599_DMSO_30min	-0.3845	0.286428	-1.3424	18.3722	0.195821	0.714483
ASPM_HUMAN	Q8IZT6	Abnormal spindle-like microcephaly-associated protein	ASPM	ASPM_HUMAN|Q8IZT6_K1830	G-6599_DMSO_30min	-0.409961	0.391323	-1.04763	17.348	0.309187	0.793403
ASPM_HUMAN	Q8IZT6	Abnormal spindle-like microcephaly-associated protein	ASPM	ASPM_HUMAN|Q8IZT6_K3423	G-6599_DMSO_30min	-0.0777617	0.355054	-0.219014	17.597	0.82916	0.9692
ASPM_HUMAN	Q8IZT6	Abnormal spindle-like microcephaly-associated protein	ASPM	ASPM_HUMAN|Q8IZT6_K3053	G-6599_DMSO_30min	-0.307202	0.25494	-1.205	18.9731	0.24302	0.752749
ASPM_HUMAN	Q8IZT6	Abnormal spindle-like microcephaly-associated protein	ASPM	ASPM_HUMAN|Q8IZT6_K2884	G-6599_DMSO_30min	0.0885735	0.263564	0.336061	18.7853	0.74055	0.951851
ASPP2_HUMAN	Q13625	Apoptosis-stimulating of p53 protein 2	TP53BP2	ASPP2_HUMAN|Q13625_K152	G-6599_DMSO_30min	-0.639769	0.272198	-2.35038	18.1056	0.030285	0.545928
ASPP2_HUMAN	Q13625	Apoptosis-stimulating of p53 protein 2	TP53BP2	ASPP2_HUMAN|Q13625_K316	G-6599_DMSO_30min	-0.448929	0.245387	-1.82947	18.564	0.083438	0.625206
ASPP2_HUMAN	Q13625	Apoptosis-stimulating of p53 protein 2	TP53BP2	ASPP2_HUMAN|Q13625_K234	G-6599_DMSO_30min	-0.150033	0.340537	-0.440576	17.4069	0.664942	0.928803
ASPP2_HUMAN	Q13625	Apoptosis-stimulating of p53 protein 2	TP53BP2	ASPP2_HUMAN|Q13625_K275	G-6599_DMSO_30min	-0.385383	0.269733	-1.42875	18.1417	0.170067	0.698818
ASURF_HUMAN	L0R819	NA	NA	ASURF_HUMAN|L0R819_K45	G-6599_DMSO_30min	-0.246363	0.269675	-0.913556	18.4075	0.372762	0.822672
ASXL1_HUMAN	Q8IXJ9	Putative Polycomb group protein ASXL1	ASXL1	ASXL1_HUMAN|Q8IXJ9_K351	G-6599_DMSO_30min	-0.370265	0.239361	-1.54689	23.7402	0.135119	0.667972
ASXL1_HUMAN	Q8IXJ9	Putative Polycomb group protein ASXL1	ASXL1	ASXL1_HUMAN|Q8IXJ9_K362	G-6599_DMSO_30min	-0.0567354	0.294077	-0.192927	21.0021	0.84887	0.974854
ASXL1_HUMAN	Q8IXJ9	Putative Polycomb group protein ASXL1	ASXL1	ASXL1_HUMAN|Q8IXJ9_K1446	G-6599_DMSO_30min	0.00581748	0.298849	0.0194663	20.8367	0.984654	0.997403
ASXL2_HUMAN	Q76L83	Putative Polycomb group protein ASXL2	ASXL2	ASXL2_HUMAN|Q76L83_K370	G-6599_DMSO_30min	0.708854	1.86084	0.380931	14.2826	0.70886	0.942991
AT11A_HUMAN	P98196	Probable phospholipid-transporting ATPase IH	ATP11A	AT11A_HUMAN|P98196_K678	G-6599_DMSO_30min	0.0774288	0.30809	0.251319	18.8828	0.804282	0.965314
AT132_HUMAN	Q9NQ11	Probable cation-transporting ATPase 13A2	ATP13A2	AT132_HUMAN|Q9NQ11_K804	G-6599_DMSO_30min	-0.164526	0.314593	-0.522981	19.6992	0.606821	0.909948
AT132_HUMAN	Q9NQ11	Probable cation-transporting ATPase 13A2	ATP13A2	AT132_HUMAN|Q9NQ11_K143	G-6599_DMSO_30min	-0.171052	0.34461	-0.496364	19.0818	0.625307	0.915696
AT132_HUMAN	Q9NQ11	Probable cation-transporting ATPase 13A2	ATP13A2	AT132_HUMAN|Q9NQ11_K839	G-6599_DMSO_30min	0.360382	0.43382	0.830719	17.9823	0.417026	0.834031
AT133_HUMAN	Q9H7F0	Probable cation-transporting ATPase 13A3	ATP13A3	AT133_HUMAN|Q9H7F0_K739	G-6599_DMSO_30min	-0.114397	0.257397	-0.444437	18.9265	0.661767	0.927846
AT133_HUMAN	Q9H7F0	Probable cation-transporting ATPase 13A3	ATP13A3	AT133_HUMAN|Q9H7F0_K355	G-6599_DMSO_30min	-0.0550672	0.24847	-0.221625	19.1379	0.826954	0.968923
AT133_HUMAN	Q9H7F0	Probable cation-transporting ATPase 13A3	ATP13A3	AT133_HUMAN|Q9H7F0_K342	G-6599_DMSO_30min	-0.118505	0.283297	-0.418308	18.4298	0.680556	0.933709
AT1A1_HUMAN	P05023	Sodium/potassium-transporting ATPase subunit alpha-1	ATP1A1	AT1A1_HUMAN|P05023_K726	G-6599_DMSO_30min	-0.171264	0.277281	-0.617655	22.0374	0.543133	0.888363
AT1A1_HUMAN	P05023	Sodium/potassium-transporting ATPase subunit alpha-1	ATP1A1	AT1A1_HUMAN|P05023_K21	G-6599_DMSO_30min	0.489004	1.0885	0.449244	16.5641	0.659078	0.927188
AT1A1_HUMAN	P05023	Sodium/potassium-transporting ATPase subunit alpha-1	ATP1A1	AT1A1_HUMAN|P05023_K468	G-6599_DMSO_30min	-0.415303	0.304321	-1.36469	20.9623	0.186822	0.706959
AT1A1_HUMAN	P05023	Sodium/potassium-transporting ATPase subunit alpha-1	ATP1A1	AT1A1_HUMAN|P05023_K683	G-6599_DMSO_30min	-0.0880688	0.443473	-0.198589	18.3355	0.84477	0.973972
AT1A1_HUMAN	P05023	Sodium/potassium-transporting ATPase subunit alpha-1	ATP1A1	AT1A1_HUMAN|P05023_K476	G-6599_DMSO_30min	-0.318322	0.276998	-1.14918	22.0505	0.262793	0.764164
AT1A1_HUMAN	P05023	Sodium/potassium-transporting ATPase subunit alpha-1	ATP1A1	AT1A1_HUMAN|P05023_K444	G-6599_DMSO_30min	-0.348248	0.277393	-1.25543	22.0323	0.222474	0.735618
AT1A1_HUMAN	P05023	Sodium/potassium-transporting ATPase subunit alpha-1	ATP1A1	AT1A1_HUMAN|P05023_K605	G-6599_DMSO_30min	-0.284014	0.304911	-0.931465	20.9423	0.362228	0.818459
AT1A1_HUMAN	P05023	Sodium/potassium-transporting ATPase subunit alpha-1	ATP1A1	AT1A1_HUMAN|P05023_K377	G-6599_DMSO_30min	-0.190646	0.391	-0.487586	18.9806	0.631428	0.918917
AT1A1_HUMAN	P05023	Sodium/potassium-transporting ATPase subunit alpha-1	ATP1A1	AT1A1_HUMAN|P05023_K9	G-6599_DMSO_30min	0.166333	1.00954	0.16476	16.6189	0.87112	0.97997
AT1A1_HUMAN	P05023	Sodium/potassium-transporting ATPase subunit alpha-1	ATP1A1	AT1A1_HUMAN|P05023_K177	G-6599_DMSO_30min	1.23821	1.17506	1.05374	16.5165	0.307174	0.793269
AT1A1_HUMAN	P05023	Sodium/potassium-transporting ATPase subunit alpha-1	ATP1A1	AT1A1_HUMAN|P05023_K162	G-6599_DMSO_30min	-0.40164	0.268229	-1.49737	22.4787	0.148207	0.678181
AT1A3_HUMAN	P13637	Sodium/potassium-transporting ATPase subunit alpha-3	ATP1A3	AT1A3_HUMAN|P13637_K424	G-6599_DMSO_30min	-0.0476466	0.333637	-0.142809	31.5813	0.887348	0.984435
AT1A3_HUMAN	P13637	Sodium/potassium-transporting ATPase subunit alpha-3	ATP1A3	AT1A3_HUMAN|P13637_K57	G-6599_DMSO_30min	-0.0979119	0.366573	-0.267101	29.7864	0.791232	0.962965
AT1B1_HUMAN	P05026	Sodium/potassium-transporting ATPase subunit beta-1	ATP1B1	AT1B1_HUMAN|P05026_K21	G-6599_DMSO_30min	-0.172826	0.239836	-0.7206	22.4927	0.478578	0.864771
AT1B3_HUMAN	P54709	Sodium/potassium-transporting ATPase subunit beta-3	ATP1B3	AT1B3_HUMAN|P54709_K7	G-6599_DMSO_30min	-0.260116	0.23307	-1.11604	21.9324	0.276482	0.775575
AT1B3_HUMAN	P54709	Sodium/potassium-transporting ATPase subunit beta-3	ATP1B3	AT1B3_HUMAN|P54709_K111	G-6599_DMSO_30min	-0.0426975	0.283386	-0.150669	19.9472	0.88175	0.983654
AT2A1_HUMAN	O14983	Sarcoplasmic/endoplasmic reticulum calcium ATPase 1	ATP2A1	AT2A1_HUMAN|O14983_K515	G-6599_DMSO_30min	-0.437076	0.303299	-1.44107	22.7865	0.163166	0.69168
AT2A1_HUMAN	O14983	Sarcoplasmic/endoplasmic reticulum calcium ATPase 1	ATP2A1	AT2A1_HUMAN|O14983_K684	G-6599_DMSO_30min	-0.491336	0.285033	-1.72378	23.7477	0.0977436	0.636286
AT2A2_HUMAN	P16615	Sarcoplasmic/endoplasmic reticulum calcium ATPase 2	ATP2A2	AT2A2_HUMAN|P16615_K650	G-6599_DMSO_30min	-0.27918	0.370318	-0.753893	27.5771	0.457303	0.854558
AT2A2_HUMAN	P16615	Sarcoplasmic/endoplasmic reticulum calcium ATPase 2	ATP2A2	AT2A2_HUMAN|P16615_K533	G-6599_DMSO_30min	-0.441137	0.32724	-1.34805	30.3528	0.187617	0.706959
AT2A2_HUMAN	P16615	Sarcoplasmic/endoplasmic reticulum calcium ATPase 2	ATP2A2	AT2A2_HUMAN|P16615_K712	G-6599_DMSO_30min	-0.309797	0.370714	-0.835676	27.553	0.410526	0.830249
AT2A2_HUMAN	P16615	Sarcoplasmic/endoplasmic reticulum calcium ATPase 2	ATP2A2	AT2A2_HUMAN|P16615_K189	G-6599_DMSO_30min	-0.171223	0.369723	-0.46311	27.6132	0.646915	0.923647
AT2A2_HUMAN	P16615	Sarcoplasmic/endoplasmic reticulum calcium ATPase 2	ATP2A2	AT2A2_HUMAN|P16615_K628	G-6599_DMSO_30min	-0.244238	0.34258	-0.712935	29.3502	0.481516	0.865912
AT2A2_HUMAN	P16615	Sarcoplasmic/endoplasmic reticulum calcium ATPase 2	ATP2A2	AT2A2_HUMAN|P16615_K611	G-6599_DMSO_30min	-0.464265	0.297048	-1.56293	31.9338	0.127926	0.665478
AT2A2_HUMAN	P16615	Sarcoplasmic/endoplasmic reticulum calcium ATPase 2	ATP2A2	AT2A2_HUMAN|P16615_K460	G-6599_DMSO_30min	-0.344627	0.348791	-0.988061	28.9418	0.331312	0.803357
AT2A2_HUMAN	P16615	Sarcoplasmic/endoplasmic reticulum calcium ATPase 2	ATP2A2	AT2A2_HUMAN|P16615_K476	G-6599_DMSO_30min	-0.480932	0.315562	-1.52405	31.0658	0.137614	0.669637
AT2B1_HUMAN	P20020	Plasma membrane calcium-transporting ATPase 1	ATP2B1	AT2B1_HUMAN|P20020_K495	G-6599_DMSO_30min	-0.199806	0.277264	-0.720635	20.8135	0.479151	0.864988
AT2B1_HUMAN	P20020	Plasma membrane calcium-transporting ATPase 1	ATP2B1	AT2B1_HUMAN|P20020_K337	G-6599_DMSO_30min	-0.412425	0.268074	-1.53848	21.1652	0.13875	0.671609
AT2B1_HUMAN	P20020	Plasma membrane calcium-transporting ATPase 1	ATP2B1	AT2B1_HUMAN|P20020_K721	G-6599_DMSO_30min	-0.139406	0.275326	-0.506331	20.8845	0.617928	0.912449
AT2B1_HUMAN	P20020	Plasma membrane calcium-transporting ATPase 1	ATP2B1	AT2B1_HUMAN|P20020_K19	G-6599_DMSO_30min	-0.289753	0.339856	-0.852575	19.1787	0.404417	0.828297
AT2B4_HUMAN	P23634	Plasma membrane calcium-transporting ATPase 4	ATP2B4	AT2B4_HUMAN|P23634_K617	G-6599_DMSO_30min	-0.590113	0.279234	-2.11333	21.3025	0.0465363	0.571409
AT2C1_HUMAN	P98194	Calcium-transporting ATPase type 2C member 1	ATP2C1	AT2C1_HUMAN|P98194_K229	G-6599_DMSO_30min	0.140016	0.643268	0.217664	16.647	0.830337	0.969384
AT2C1_HUMAN	P98194	Calcium-transporting ATPase type 2C member 1	ATP2C1	AT2C1_HUMAN|P98194_K146	G-6599_DMSO_30min	-0.121277	0.242312	-0.500501	19.3742	0.62236	0.914879
AT5F1_HUMAN	P24539	ATP synthase F(0) complex subunit B1, mitochondrial	ATP5F1	AT5F1_HUMAN|P24539_K244	G-6599_DMSO_30min	-0.163896	0.240587	-0.681233	24.0667	0.502227	0.873394
AT5F1_HUMAN	P24539	ATP synthase F(0) complex subunit B1, mitochondrial	ATP5F1	AT5F1_HUMAN|P24539_K249	G-6599_DMSO_30min	0.0270949	0.233252	0.116161	24.6146	0.908467	0.988943
ATAD2_HUMAN	Q6PL18	ATPase family AAA domain-containing protein 2	ATAD2	ATAD2_HUMAN|Q6PL18_K504	G-6599_DMSO_30min	-0.0805563	0.403358	-0.199714	17.6694	0.843985	0.973791
ATAD2_HUMAN	Q6PL18	ATPase family AAA domain-containing protein 2	ATAD2	ATAD2_HUMAN|Q6PL18_K175	G-6599_DMSO_30min	0.190158	0.649595	0.292733	16.7721	0.773317	0.959236
ATF1_HUMAN	P18846	Cyclic AMP-dependent transcription factor ATF-1	ATF1	ATF1_HUMAN|P18846_K260	G-6599_DMSO_30min	-0.397018	0.313134	-1.26789	18.3215	0.220715	0.734359
ATF1_HUMAN	P18846	Cyclic AMP-dependent transcription factor ATF-1	ATF1	ATF1_HUMAN|P18846_K263	G-6599_DMSO_30min	-0.422944	0.26611	-1.58936	19.1858	0.128323	0.665752
ATF2_HUMAN	P15336	Cyclic AMP-dependent transcription factor ATF-2	ATF2	ATF2_HUMAN|P15336_K409	G-6599_DMSO_30min	0.0324218	0.332822	0.0974147	19.319	0.923401	0.991061
ATF2_HUMAN	P15336	Cyclic AMP-dependent transcription factor ATF-2	ATF2	ATF2_HUMAN|P15336_K354	G-6599_DMSO_30min	-0.234644	0.505784	-0.463922	17.5098	0.648419	0.924359
ATF3_HUMAN	P18847	Cyclic AMP-dependent transcription factor ATF-3	ATF3	ATF3_HUMAN|P18847_K52	G-6599_DMSO_30min	-0.502939	0.292048	-1.72211	23.1203	0.098403	0.636286
ATG3_HUMAN	Q9NT62	Ubiquitin-like-conjugating enzyme ATG3	ATG3	ATG3_HUMAN|Q9NT62_K185	G-6599_DMSO_30min	0.00902468	0.534681	0.0168786	17.0222	0.98673	0.997403
ATG3_HUMAN	Q9NT62	Ubiquitin-like-conjugating enzyme ATG3	ATG3	ATG3_HUMAN|Q9NT62_K11	G-6599_DMSO_30min	-0.458249	0.297096	-1.54242	18.9219	0.139529	0.673346
ATG3_HUMAN	Q9NT62	Ubiquitin-like-conjugating enzyme ATG3	ATG3	ATG3_HUMAN|Q9NT62_K208	G-6599_DMSO_30min	0.117359	0.50783	0.231099	17.1102	0.819978	0.967371
ATG4C_HUMAN	Q96DT6	Cysteine protease ATG4C	ATG4C	ATG4C_HUMAN|Q96DT6_K30	G-6599_DMSO_30min	-0.294897	0.24226	-1.21728	22.7757	0.235962	0.746889
ATG9A_HUMAN	Q7Z3C6	Autophagy-related protein 9A	ATG9A	ATG9A_HUMAN|Q7Z3C6_K581	G-6599_DMSO_30min	-0.187654	0.276373	-0.678988	21.0008	0.50456	0.874254
ATG9A_HUMAN	Q7Z3C6	Autophagy-related protein 9A	ATG9A	ATG9A_HUMAN|Q7Z3C6_K192	G-6599_DMSO_30min	-0.0505947	0.279146	-0.181248	20.8975	0.857919	0.976159
ATLA2_HUMAN	Q8NHH9	Atlastin-2	ATL2	ATLA2_HUMAN|Q8NHH9_K357	G-6599_DMSO_30min	0.166277	0.322609	0.515415	18.338	0.612421	0.909948
ATLA3_HUMAN	Q6DD88	Atlastin-3	ATL3	ATLA3_HUMAN|Q6DD88_K239	G-6599_DMSO_30min	-0.207331	0.445646	-0.465237	30.6409	0.645051	0.922459
ATM_HUMAN	Q13315	Serine-protein kinase ATM	ATM	ATM_HUMAN|Q13315_K1646	G-6599_DMSO_30min	0.643239	0.946354	0.679702	16.3528	0.506202	0.874964
ATM_HUMAN	Q13315	Serine-protein kinase ATM	ATM	ATM_HUMAN|Q13315_K1191	G-6599_DMSO_30min	-0.260564	0.218538	-1.1923	18.657	0.248087	0.757307
ATM_HUMAN	Q13315	Serine-protein kinase ATM	ATM	ATM_HUMAN|Q13315_K1109	G-6599_DMSO_30min	-0.072399	0.295821	-0.244739	17.5172	0.809503	0.966437
ATOX1_HUMAN	O00244	Copper transport protein ATOX1	ATOX1	ATOX1_HUMAN|O00244_K60	G-6599_DMSO_30min	-0.539703	0.324026	-1.66562	20.3973	0.111075	0.650599
ATOX1_HUMAN	O00244	Copper transport protein ATOX1	ATOX1	ATOX1_HUMAN|O00244_K25	G-6599_DMSO_30min	-0.408829	0.301396	-1.35645	21.1126	0.189285	0.706959
ATOX1_HUMAN	O00244	Copper transport protein ATOX1	ATOX1	ATOX1_HUMAN|O00244_K30	G-6599_DMSO_30min	-0.520711	0.316486	-1.64529	20.6171	0.115071	0.655757
ATP68_HUMAN	P56378	NA	NA	ATP68_HUMAN|P56378_K49	G-6599_DMSO_30min	0.121112	0.303409	0.399172	24.7601	0.693189	0.938143
ATP7B_HUMAN	P35670	Copper-transporting ATPase 2	ATP7B	ATP7B_HUMAN|P35670_K1258	G-6599_DMSO_30min	-0.144493	0.254297	-0.568204	18.597	0.576694	0.898012
ATP7B_HUMAN	P35670	Copper-transporting ATPase 2	ATP7B	ATP7B_HUMAN|P35670_K832	G-6599_DMSO_30min	-0.164045	0.243639	-0.673312	18.8225	0.508932	0.875876
ATPB_HUMAN	P06576	ATP synthase subunit beta, mitochondrial	ATP5B	ATPB_HUMAN|P06576_K198	G-6599_DMSO_30min	-0.0482948	0.294087	-0.164219	25.5093	0.870853	0.97997
ATR_HUMAN	Q13535	Serine/threonine-protein kinase ATR	ATR	ATR_HUMAN|Q13535_K866	G-6599_DMSO_30min	-0.0559798	0.358991	-0.155936	20.0053	0.877646	0.982621
ATRN_HUMAN	O75882	Attractin	ATRN	ATRN_HUMAN|O75882_K1418	G-6599_DMSO_30min	-0.250879	0.315635	-0.79484	18.167	0.436968	0.84617
ATRX_HUMAN	P46100	Transcriptional regulator ATRX	ATRX	ATRX_HUMAN|P46100_K2282	G-6599_DMSO_30min	-0.0411986	0.368605	-0.111769	17.0632	0.912311	0.989281
ATRX_HUMAN	P46100	Transcriptional regulator ATRX	ATRX	ATRX_HUMAN|P46100_K375	G-6599_DMSO_30min	-0.214054	0.344953	-0.620531	17.1845	0.543051	0.888363
ATX10_HUMAN	Q9UBB4	Ataxin-10	ATXN10	ATX10_HUMAN|Q9UBB4_K438	G-6599_DMSO_30min	0.269931	0.881823	0.306106	16.5906	0.763332	0.95739
ATX10_HUMAN	Q9UBB4	Ataxin-10	ATXN10	ATX10_HUMAN|Q9UBB4_K384	G-6599_DMSO_30min	-0.365543	0.250114	-1.4615	21.2126	0.158534	0.690639
ATX10_HUMAN	Q9UBB4	Ataxin-10	ATXN10	ATX10_HUMAN|Q9UBB4_K451	G-6599_DMSO_30min	-0.225083	0.363886	-0.618555	18.4502	0.543772	0.888437
ATX10_HUMAN	Q9UBB4	Ataxin-10	ATXN10	ATX10_HUMAN|Q9UBB4_K288	G-6599_DMSO_30min	-0.116302	0.4587	-0.253547	17.5974	0.802784	0.964821
ATX10_HUMAN	Q9UBB4	Ataxin-10	ATXN10	ATX10_HUMAN|Q9UBB4_K34	G-6599_DMSO_30min	-0.282843	0.275079	-1.02822	20.2763	0.315955	0.796127
ATX10_HUMAN	Q9UBB4	Ataxin-10	ATXN10	ATX10_HUMAN|Q9UBB4_K371	G-6599_DMSO_30min	-0.282189	0.245597	-1.14899	21.4163	0.263231	0.764164
ATX10_HUMAN	Q9UBB4	Ataxin-10	ATXN10	ATX10_HUMAN|Q9UBB4_K262	G-6599_DMSO_30min	-0.193456	0.313555	-0.616977	19.2787	0.544468	0.888849
ATX10_HUMAN	Q9UBB4	Ataxin-10	ATXN10	ATX10_HUMAN|Q9UBB4_K452	G-6599_DMSO_30min	0.707228	1.06566	0.663653	16.4765	0.516092	0.881441
ATX2L_HUMAN	Q8WWM7	Ataxin-2-like protein	ATXN2L	ATX2L_HUMAN|Q8WWM7_K224	G-6599_DMSO_30min	-0.387224	0.279712	-1.38437	17.7918	0.183365	0.706705
ATX2L_HUMAN	Q8WWM7	Ataxin-2-like protein	ATXN2L	ATX2L_HUMAN|Q8WWM7_K155	G-6599_DMSO_30min	-0.383341	0.292644	-1.30992	17.6517	0.207014	0.725538
ATX3_HUMAN	P54252	Ataxin-3	ATXN3	ATX3_HUMAN|P54252_K200	G-6599_DMSO_30min	-0.176278	0.295056	-0.597439	19.7236	0.557012	0.891119
ATX3_HUMAN	P54252	Ataxin-3	ATXN3	ATX3_HUMAN|P54252_K291	G-6599_DMSO_30min	-0.359919	0.346935	-1.03742	18.699	0.312768	0.795288
ATX3_HUMAN	P54252	Ataxin-3	ATXN3	ATX3_HUMAN|P54252_K206	G-6599_DMSO_30min	0.404723	0.57324	0.706027	17.0983	0.48968	0.868611
AUP1_HUMAN	Q9Y679	Ancient ubiquitous protein 1	AUP1	AUP1_HUMAN|Q9Y679_K250	G-6599_DMSO_30min	-0.492009	0.305974	-1.60801	23.4323	0.121225	0.662325
AUP1_HUMAN	Q9Y679	Ancient ubiquitous protein 1	AUP1	AUP1_HUMAN|Q9Y679_K305	G-6599_DMSO_30min	-0.293351	0.267704	-1.09581	25.8561	0.283266	0.780019
AUP1_HUMAN	Q9Y679	Ancient ubiquitous protein 1	AUP1	AUP1_HUMAN|Q9Y679_K347	G-6599_DMSO_30min	0.129953	0.993236	0.130838	12.6817	0.897956	0.987562
AUP1_HUMAN	Q9Y679	Ancient ubiquitous protein 1	AUP1	AUP1_HUMAN|Q9Y679_K377	G-6599_DMSO_30min	-0.553704	0.336784	-1.64409	22.0587	0.114335	0.653586
AUP1_HUMAN	Q9Y679	Ancient ubiquitous protein 1	AUP1	AUP1_HUMAN|Q9Y679_K359	G-6599_DMSO_30min	-0.311772	0.310489	-1.00413	23.2037	0.325672	0.800869
AURKB_HUMAN	Q96GD4	Aurora kinase B	AURKB	AURKB_HUMAN|Q96GD4_K56	G-6599_DMSO_30min	-0.262267	0.353462	-0.741996	20.1357	0.466657	0.858967
AURKB_HUMAN	Q96GD4	Aurora kinase B	AURKB	AURKB_HUMAN|Q96GD4_K287	G-6599_DMSO_30min	-0.403104	0.281958	-1.42966	22.6444	0.166467	0.693204
AURKB_HUMAN	Q96GD4	Aurora kinase B	AURKB	AURKB_HUMAN|Q96GD4_K85	G-6599_DMSO_30min	0.0105137	0.349868	0.0300505	20.2235	0.976321	0.997104
AURKB_HUMAN	Q96GD4	Aurora kinase B	AURKB	AURKB_HUMAN|Q96GD4_K164	G-6599_DMSO_30min	-0.175287	0.251896	-0.695871	24.4482	0.493072	0.869593
AVEN_HUMAN	Q9NQS1	Cell death regulator Aven	AVEN	AVEN_HUMAN|Q9NQS1_K215	G-6599_DMSO_30min	-0.309601	0.359021	-0.862349	18.36	0.39962	0.825464
AXIN2_HUMAN	Q9Y2T1	Axin-2	AXIN2	AXIN2_HUMAN|Q9Y2T1_K80	G-6599_DMSO_30min	-0.141644	0.422732	-0.335069	17.4739	0.741562	0.952815
AXIN2_HUMAN	Q9Y2T1	Axin-2	AXIN2	AXIN2_HUMAN|Q9Y2T1_K242	G-6599_DMSO_30min	-0.491883	0.31508	-1.56114	18.5297	0.135408	0.667972
AZIN1_HUMAN	O14977	Antizyme inhibitor 1	AZIN1	AZIN1_HUMAN|O14977_K125	G-6599_DMSO_30min	0.343302	0.830503	0.413367	17.0567	0.684488	0.936458
AZIN1_HUMAN	O14977	Antizyme inhibitor 1	AZIN1	AZIN1_HUMAN|O14977_K121	G-6599_DMSO_30min	-0.302142	0.245336	-1.23154	27.3023	0.228623	0.738903
AZIN1_HUMAN	O14977	Antizyme inhibitor 1	AZIN1	AZIN1_HUMAN|O14977_K47	G-6599_DMSO_30min	-0.0629983	0.273714	-0.230161	25.0314	0.819837	0.967371
AZIN1_HUMAN	O14977	Antizyme inhibitor 1	AZIN1	AZIN1_HUMAN|O14977_K340	G-6599_DMSO_30min	-0.18599	0.266089	-0.698975	25.5819	0.490874	0.868751
B2CL1_HUMAN	Q07817	Bcl-2-like protein 1	BCL2L1	B2CL1_HUMAN|Q07817_K87	G-6599_DMSO_30min	-0.170308	0.314166	-0.542095	18.6062	0.594187	0.905892
B2L15_HUMAN	Q5TBC7	Bcl-2-like protein 15	BCL2L15	B2L15_HUMAN|Q5TBC7_K73	G-6599_DMSO_30min	0.043708	0.467848	0.0934236	18.0229	0.926598	0.991061
B3A2_HUMAN	P04920	Anion exchange protein 2	SLC4A2	B3A2_HUMAN|P04920_K658	G-6599_DMSO_30min	0.240637	0.712061	0.337944	16.6016	0.739641	0.951851
BABA2_HUMAN	Q9NXR7	NA	NA	BABA2_HUMAN|Q9NXR7_K382	G-6599_DMSO_30min	-0.436367	0.432763	-1.00833	16.9201	0.3275	0.802247
BABA2_HUMAN	Q9NXR7	NA	NA	BABA2_HUMAN|Q9NXR7_K367	G-6599_DMSO_30min	0.163618	0.302624	0.540663	17.6692	0.595491	0.905892
BACD1_HUMAN	Q8WZ19	BTB/POZ domain-containing adapter for CUL3-mediated RhoA degradation protein 1	KCTD13	BACD1_HUMAN|Q8WZ19_K247	G-6599_DMSO_30min	-0.278141	0.36609	-0.759762	25.6687	0.454319	0.853715
BACD3_HUMAN	Q9H3F6	BTB/POZ domain-containing adapter for CUL3-mediated RhoA degradation protein 3	KCTD10	BACD3_HUMAN|Q9H3F6_K25	G-6599_DMSO_30min	-0.29669	0.296641	-1.00017	17.5103	0.330852	0.803357
BACD3_HUMAN	Q9H3F6	BTB/POZ domain-containing adapter for CUL3-mediated RhoA degradation protein 3	KCTD10	BACD3_HUMAN|Q9H3F6_K113	G-6599_DMSO_30min	-0.614772	1.13775	-0.540342	16.3153	0.596261	0.905892
BACD3_HUMAN	Q9H3F6	BTB/POZ domain-containing adapter for CUL3-mediated RhoA degradation protein 3	KCTD10	BACD3_HUMAN|Q9H3F6_K52	G-6599_DMSO_30min	-0.466785	0.303648	-1.53726	17.45	0.142165	0.67505
BACH_HUMAN	O00154	Cytosolic acyl coenzyme A thioester hydrolase	ACOT7	BACH_HUMAN|O00154_K168	G-6599_DMSO_30min	-0.328946	0.328474	-1.00144	18.5574	0.329495	0.802894
BAF_HUMAN	O75531	Barrier-to-autointegration factor	BANF1	BAF_HUMAN|O75531_K64	G-6599_DMSO_30min	-0.385591	0.395427	-0.975126	30.2583	0.33723	0.806045
BAG1_HUMAN	Q99933	BAG family molecular chaperone regulator 1	BAG1	BAG1_HUMAN|Q99933_K273	G-6599_DMSO_30min	0.0540412	0.330596	0.163466	19.0551	0.871873	0.980155
BAG2_HUMAN	O95816	BAG family molecular chaperone regulator 2	BAG2	BAG2_HUMAN|O95816_K200	G-6599_DMSO_30min	-0.332017	0.253833	-1.30801	18.0554	0.207278	0.725827
BAG2_HUMAN	O95816	BAG family molecular chaperone regulator 2	BAG2	BAG2_HUMAN|O95816_K195	G-6599_DMSO_30min	-0.226695	0.246051	-0.921332	18.1787	0.368943	0.82061
BAG6_HUMAN	P46379	Large proline-rich protein BAG6	BAG6	BAG6_HUMAN|P46379_K1033	G-6599_DMSO_30min	-0.57789	0.302422	-1.91087	17.3744	0.0726645	0.605921
BAG6_HUMAN	P46379	Large proline-rich protein BAG6	BAG6	BAG6_HUMAN|P46379_K1049	G-6599_DMSO_30min	-0.444878	0.291972	-1.5237	17.4605	0.14549	0.676452
BAG6_HUMAN	P46379	Large proline-rich protein BAG6	BAG6	BAG6_HUMAN|P46379_K71	G-6599_DMSO_30min	-0.535067	0.247427	-2.16253	17.9661	0.0443125	0.563375
BAG6_HUMAN	P46379	Large proline-rich protein BAG6	BAG6	BAG6_HUMAN|P46379_K80	G-6599_DMSO_30min	-0.469305	0.26952	-1.74126	17.6825	0.099007	0.636286
BAG6_HUMAN	P46379	Large proline-rich protein BAG6	BAG6	BAG6_HUMAN|P46379_K56	G-6599_DMSO_30min	0.595011	0.989089	0.601574	16.335	0.555715	0.890628
BAG6_HUMAN	P46379	Large proline-rich protein BAG6	BAG6	BAG6_HUMAN|P46379_K40	G-6599_DMSO_30min	-0.758661	0.366085	-2.07236	17.0033	0.05375	0.589224
BAHD1_HUMAN	Q8TBE0	Bromo adjacent homology domain-containing 1 protein	BAHD1	BAHD1_HUMAN|Q8TBE0_K540	G-6599_DMSO_30min	-0.274374	0.329848	-0.83182	17.4614	0.416742	0.833846
BAIP2_HUMAN	Q9UQB8	Brain-specific angiogenesis inhibitor 1-associated protein 2	BAIAP2	BAIP2_HUMAN|Q9UQB8_K359	G-6599_DMSO_30min	-0.474515	0.303222	-1.56491	16.9578	0.136073	0.667972
BAP18_HUMAN	Q8IXM2	Chromatin complexes subunit BAP18	BAP18	BAP18_HUMAN|Q8IXM2_K77	G-6599_DMSO_30min	-0.277959	0.265805	-1.04573	19.0026	0.308808	0.793403
BAP29_HUMAN	Q9UHQ4	B-cell receptor-associated protein 29	BCAP29	BAP29_HUMAN|Q9UHQ4_K217	G-6599_DMSO_30min	0.119913	0.439218	0.273015	16.9675	0.788137	0.962613
BAP29_HUMAN	Q9UHQ4	B-cell receptor-associated protein 29	BCAP29	BAP29_HUMAN|Q9UHQ4_K146	G-6599_DMSO_30min	-0.123419	0.246056	-0.501588	18.6852	0.621816	0.914524
BAP29_HUMAN	Q9UHQ4	B-cell receptor-associated protein 29	BCAP29	BAP29_HUMAN|Q9UHQ4_K138	G-6599_DMSO_30min	-0.143103	0.221393	-0.646373	19.3066	0.525648	0.885585
BAP31_HUMAN	P51572	B-cell receptor-associated protein 31	BCAP31	BAP31_HUMAN|P51572_K214	G-6599_DMSO_30min	-0.0633775	0.300978	-0.210572	19.5932	0.835396	0.971242
BAP31_HUMAN	P51572	B-cell receptor-associated protein 31	BCAP31	BAP31_HUMAN|P51572_K185	G-6599_DMSO_30min	-0.449051	0.233286	-1.92489	22.0986	0.0672108	0.595947
BAP31_HUMAN	P51572	B-cell receptor-associated protein 31	BCAP31	BAP31_HUMAN|P51572_K95	G-6599_DMSO_30min	-0.102066	0.257143	-0.396925	20.9668	0.695434	0.938362
BAP31_HUMAN	P51572	B-cell receptor-associated protein 31	BCAP31	BAP31_HUMAN|P51572_K192	G-6599_DMSO_30min	-0.107423	0.3609	-0.297653	18.5116	0.769283	0.958965
BAP31_HUMAN	P51572	B-cell receptor-associated protein 31	BCAP31	BAP31_HUMAN|P51572_K138	G-6599_DMSO_30min	0.527116	0.889391	0.592671	16.5878	0.561395	0.893138
BAP31_HUMAN	P51572	B-cell receptor-associated protein 31	BCAP31	BAP31_HUMAN|P51572_K167	G-6599_DMSO_30min	-0.130116	0.404885	-0.321364	18.0209	0.751632	0.953836
BAP31_HUMAN	P51572	B-cell receptor-associated protein 31	BCAP31	BAP31_HUMAN|P51572_K244	G-6599_DMSO_30min	-0.332348	0.34093	-0.974825	18.8047	0.342021	0.806466
BAP31_HUMAN	P51572	B-cell receptor-associated protein 31	BCAP31	BAP31_HUMAN|P51572_K158	G-6599_DMSO_30min	0.096461	0.307952	0.313234	19.4312	0.75744	0.955261
BAP31_HUMAN	P51572	B-cell receptor-associated protein 31	BCAP31	BAP31_HUMAN|P51572_K243	G-6599_DMSO_30min	-0.326638	0.377235	-0.865872	18.308	0.397766	0.824993
BAP31_HUMAN	P51572	B-cell receptor-associated protein 31	BCAP31	BAP31_HUMAN|P51572_K176	G-6599_DMSO_30min	0.154386	0.401735	0.384298	18.0505	0.705248	0.941843
BAP31_HUMAN	P51572	B-cell receptor-associated protein 31	BCAP31	BAP31_HUMAN|P51572_K148	G-6599_DMSO_30min	0.0849834	0.294914	0.288163	19.7443	0.776225	0.95959
BAP31_HUMAN	P51572	B-cell receptor-associated protein 31	BCAP31	BAP31_HUMAN|P51572_K159	G-6599_DMSO_30min	-0.0588897	0.256317	-0.229753	21.0004	0.820507	0.967371
BARD1_HUMAN	Q99728	BRCA1-associated RING domain protein 1	BARD1	BARD1_HUMAN|Q99728_K139	G-6599_DMSO_30min	-0.886999	0.294247	-3.01448	18.4483	0.00729964	0.462987
BASI_HUMAN	P35613	Basigin	BSG	BASI_HUMAN|P35613_K375	G-6599_DMSO_30min	-1.04829	0.3594	-2.91678	18.8902	0.00888344	0.462987
BASI_HUMAN	P35613	Basigin	BSG	BASI_HUMAN|P35613_K257	G-6599_DMSO_30min	0.242793	0.409227	0.593296	18.2504	0.560265	0.892044
BASI_HUMAN	P35613	Basigin	BSG	BASI_HUMAN|P35613_K179	G-6599_DMSO_30min	-0.217426	0.278479	-0.780765	20.8476	0.443717	0.851314
BASI_HUMAN	P35613	Basigin	BSG	BASI_HUMAN|P35613_K173	G-6599_DMSO_30min	-0.361001	0.29878	-1.20825	20.1901	0.240912	0.751501
BASI_HUMAN	P35613	Basigin	BSG	BASI_HUMAN|P35613_K187	G-6599_DMSO_30min	-0.020642	0.287954	-0.0716851	20.5218	0.943547	0.992029
BAX_HUMAN	Q07812	Apoptosis regulator BAX	BAX	BAX_HUMAN|Q07812_K21	G-6599_DMSO_30min	-0.0293047	0.485554	-0.060353	16.7325	0.952589	0.993894
BAX_HUMAN	Q07812	Apoptosis regulator BAX	BAX	BAX_HUMAN|Q07812_K57	G-6599_DMSO_30min	-0.326624	0.289703	-1.12744	17.6766	0.274626	0.775073
BAZ1A_HUMAN	Q9NRL2	Bromodomain adjacent to zinc finger domain protein 1A	BAZ1A	BAZ1A_HUMAN|Q9NRL2_K598	G-6599_DMSO_30min	-0.368292	0.240129	-1.53373	18.5686	0.141959	0.67505
BAZ1B_HUMAN	Q9UIG0	Tyrosine-protein kinase BAZ1B	BAZ1B	BAZ1B_HUMAN|Q9UIG0_K344	G-6599_DMSO_30min	-0.38606	0.285473	-1.35235	22.1261	0.189923	0.706959
BAZ1B_HUMAN	Q9UIG0	Tyrosine-protein kinase BAZ1B	BAZ1B	BAZ1B_HUMAN|Q9UIG0_K322	G-6599_DMSO_30min	-0.520873	0.274858	-1.89506	22.6403	0.0709245	0.598108
BAZ1B_HUMAN	Q9UIG0	Tyrosine-protein kinase BAZ1B	BAZ1B	BAZ1B_HUMAN|Q9UIG0_K1151	G-6599_DMSO_30min	-0.555982	0.271482	-2.04795	22.8175	0.0522433	0.587785
BAZ1B_HUMAN	Q9UIG0	Tyrosine-protein kinase BAZ1B	BAZ1B	BAZ1B_HUMAN|Q9UIG0_K400	G-6599_DMSO_30min	0.175232	0.530194	0.330504	17.7914	0.744879	0.953513
BAZ1B_HUMAN	Q9UIG0	Tyrosine-protein kinase BAZ1B	BAZ1B	BAZ1B_HUMAN|Q9UIG0_K14	G-6599_DMSO_30min	-0.433713	0.283778	-1.52835	22.204	0.140546	0.673346
BAZ1B_HUMAN	Q9UIG0	Tyrosine-protein kinase BAZ1B	BAZ1B	BAZ1B_HUMAN|Q9UIG0_K150	G-6599_DMSO_30min	-0.139842	0.577073	-0.24233	17.5394	0.811335	0.966647
BAZ1B_HUMAN	Q9UIG0	Tyrosine-protein kinase BAZ1B	BAZ1B	BAZ1B_HUMAN|Q9UIG0_K297	G-6599_DMSO_30min	0.128994	0.583792	0.220958	17.5084	0.827681	0.969177
BAZ1B_HUMAN	Q9UIG0	Tyrosine-protein kinase BAZ1B	BAZ1B	BAZ1B_HUMAN|Q9UIG0_K136	G-6599_DMSO_30min	-0.391909	0.241146	-1.62519	24.7729	0.116778	0.659758
BAZ1B_HUMAN	Q9UIG0	Tyrosine-protein kinase BAZ1B	BAZ1B	BAZ1B_HUMAN|Q9UIG0_K893	G-6599_DMSO_30min	-0.457785	0.276173	-1.65761	22.5732	0.111231	0.650599
BAZ1B_HUMAN	Q9UIG0	Tyrosine-protein kinase BAZ1B	BAZ1B	BAZ1B_HUMAN|Q9UIG0_K1068	G-6599_DMSO_30min	0.157111	0.834512	0.188267	16.8448	0.852917	0.975872
BAZ1B_HUMAN	Q9UIG0	Tyrosine-protein kinase BAZ1B	BAZ1B	BAZ1B_HUMAN|Q9UIG0_K1107	G-6599_DMSO_30min	-0.401312	0.281284	-1.42671	22.3215	0.167501	0.694874
BAZ1B_HUMAN	Q9UIG0	Tyrosine-protein kinase BAZ1B	BAZ1B	BAZ1B_HUMAN|Q9UIG0_K853	G-6599_DMSO_30min	-0.609797	0.289947	-2.10314	21.9273	0.0471556	0.571409
BAZ1B_HUMAN	Q9UIG0	Tyrosine-protein kinase BAZ1B	BAZ1B	BAZ1B_HUMAN|Q9UIG0_K281	G-6599_DMSO_30min	-0.451395	0.291658	-1.54769	21.8538	0.136058	0.667972
BAZ1B_HUMAN	Q9UIG0	Tyrosine-protein kinase BAZ1B	BAZ1B	BAZ1B_HUMAN|Q9UIG0_K885	G-6599_DMSO_30min	-0.51822	0.306079	-1.69309	21.2869	0.105024	0.645285
BAZ2A_HUMAN	Q9UIF9	Bromodomain adjacent to zinc finger domain protein 2A	BAZ2A	BAZ2A_HUMAN|Q9UIF9_K1467	G-6599_DMSO_30min	1.09544	0.743363	1.47363	16.5346	0.159363	0.69168
BAZ2A_HUMAN	Q9UIF9	Bromodomain adjacent to zinc finger domain protein 2A	BAZ2A	BAZ2A_HUMAN|Q9UIF9_K1672	G-6599_DMSO_30min	-0.345519	0.244045	-1.4158	19.2516	0.17281	0.699019
BAZ2A_HUMAN	Q9UIF9	Bromodomain adjacent to zinc finger domain protein 2A	BAZ2A	BAZ2A_HUMAN|Q9UIF9_K1901	G-6599_DMSO_30min	-0.541467	0.371511	-1.45747	17.4784	0.162719	0.69168
BBS4_HUMAN	Q96RK4	Bardet-Biedl syndrome 4 protein	BBS4	BBS4_HUMAN|Q96RK4_K116	G-6599_DMSO_30min	-0.255251	0.238317	-1.07106	19.6314	0.297135	0.789839
BBS7_HUMAN	Q8IWZ6	Bardet-Biedl syndrome 7 protein	BBS7	BBS7_HUMAN|Q8IWZ6_K355	G-6599_DMSO_30min	-0.00871834	0.261882	-0.0332911	19.2177	0.973786	0.996886
BC11A_HUMAN	Q9H165	B-cell lymphoma/leukemia 11A	BCL11A	BC11A_HUMAN|Q9H165_K403	G-6599_DMSO_30min	0.320256	1.09298	0.293011	16.4496	0.773178	0.959236
BCAR3_HUMAN	O75815	Breast cancer anti-estrogen resistance protein 3	BCAR3	BCAR3_HUMAN|O75815_K682	G-6599_DMSO_30min	0.0554704	0.276784	0.200411	19.9313	0.84319	0.973791
BCCIP_HUMAN	Q9P287	BRCA2 and CDKN1A-interacting protein	BCCIP	BCCIP_HUMAN|Q9P287_K137	G-6599_DMSO_30min	0.131088	0.517083	0.253515	16.9128	0.802927	0.964821
BCD1_HUMAN	Q9NWK9	Box C/D snoRNA protein 1	ZNHIT6	BCD1_HUMAN|Q9NWK9_K362	G-6599_DMSO_30min	-0.0361632	0.416217	-0.0868853	17.1832	0.931767	0.991061
BCD1_HUMAN	Q9NWK9	Box C/D snoRNA protein 1	ZNHIT6	BCD1_HUMAN|Q9NWK9_K246	G-6599_DMSO_30min	-0.476871	0.283599	-1.6815	18.3455	0.109611	0.650006
BCL7A_HUMAN	Q4VC05	B-cell CLL/lymphoma 7 protein family member A	BCL7A	BCL7A_HUMAN|Q4VC05_K47	G-6599_DMSO_30min	0.404017	0.236516	1.70821	18.4045	0.10441	0.645285
BCL7B_HUMAN	Q9BQE9	B-cell CLL/lymphoma 7 protein family member B	BCL7B	BCL7B_HUMAN|Q9BQE9_K47	G-6599_DMSO_30min	0.485366	0.246297	1.97065	19.393	0.0632079	0.595573
BCL7B_HUMAN	Q9BQE9	B-cell CLL/lymphoma 7 protein family member B	BCL7B	BCL7B_HUMAN|Q9BQE9_K15	G-6599_DMSO_30min	-0.0490174	0.26345	-0.186059	18.968	0.854374	0.97609
BCL9L_HUMAN	Q86UU0	B-cell CLL/lymphoma 9-like protein	BCL9L	BCL9L_HUMAN|Q86UU0_K275	G-6599_DMSO_30min	-0.136805	1.08069	-0.126591	15.3657	0.900906	0.988612
BCLF1_HUMAN	Q9NYF8	Bcl-2-associated transcription factor 1	BCLAF1	BCLF1_HUMAN|Q9NYF8_K593	G-6599_DMSO_30min	-0.618316	0.266316	-2.32174	19.6053	0.0311471	0.545928
BCLF1_HUMAN	Q9NYF8	Bcl-2-associated transcription factor 1	BCLAF1	BCLF1_HUMAN|Q9NYF8_K437	G-6599_DMSO_30min	-0.366821	0.395585	-0.927286	17.6914	0.366257	0.819217
BCLF1_HUMAN	Q9NYF8	Bcl-2-associated transcription factor 1	BCLAF1	BCLF1_HUMAN|Q9NYF8_K413	G-6599_DMSO_30min	-0.685391	0.247985	-2.76384	20.1692	0.0119153	0.474948
BCOR_HUMAN	Q6W2J9	BCL-6 corepressor	BCOR	BCOR_HUMAN|Q6W2J9_K1460	G-6599_DMSO_30min	-0.281144	0.322998	-0.870419	17.2577	0.396018	0.824931
BD1L1_HUMAN	Q8NFC6	Biorientation of chromosomes in cell division protein 1-like 1	BOD1L1	BD1L1_HUMAN|Q8NFC6_K1389	G-6599_DMSO_30min	-0.145995	0.359218	-0.406423	21.0654	0.688531	0.93739
BEND3_HUMAN	Q5T5X7	BEN domain-containing protein 3	BEND3	BEND3_HUMAN|Q5T5X7_K129	G-6599_DMSO_30min	-0.441179	0.248895	-1.77255	21.3442	0.0905783	0.632345
BET1_HUMAN	O15155	BET1 homolog	BET1	BET1_HUMAN|O15155_K47	G-6599_DMSO_30min	-0.411003	0.280635	-1.46455	19.2628	0.159175	0.69168
BET1_HUMAN	O15155	BET1 homolog	BET1	BET1_HUMAN|O15155_K42	G-6599_DMSO_30min	-0.307993	0.282073	-1.09189	19.2297	0.288373	0.783787
BGLR_HUMAN	P08236	Beta-glucuronidase	GUSB	BGLR_HUMAN|P08236_K359	G-6599_DMSO_30min	-0.150112	0.26054	-0.576157	20.2514	0.570857	0.896191
BHE40_HUMAN	O14503	Class E basic helix-loop-helix protein 40	BHLHE40	BHE40_HUMAN|O14503_K217	G-6599_DMSO_30min	-0.534263	0.291961	-1.82991	19.249	0.0827945	0.624257
BHE40_HUMAN	O14503	Class E basic helix-loop-helix protein 40	BHLHE40	BHE40_HUMAN|O14503_K262	G-6599_DMSO_30min	-0.539744	0.327302	-1.64907	18.596	0.115924	0.658216
BHE40_HUMAN	O14503	Class E basic helix-loop-helix protein 40	BHLHE40	BHE40_HUMAN|O14503_K167	G-6599_DMSO_30min	-0.492214	0.254657	-1.93285	20.2871	0.0673359	0.595947
BHE40_HUMAN	O14503	Class E basic helix-loop-helix protein 40	BHLHE40	BHE40_HUMAN|O14503_K190	G-6599_DMSO_30min	-0.356915	0.246138	-1.45006	20.5997	0.162098	0.69168
BHE40_HUMAN	O14503	Class E basic helix-loop-helix protein 40	BHLHE40	BHE40_HUMAN|O14503_K102	G-6599_DMSO_30min	-0.279962	0.319602	-0.87597	18.7186	0.392149	0.824931
BHE40_HUMAN	O14503	Class E basic helix-loop-helix protein 40	BHLHE40	BHE40_HUMAN|O14503_K288	G-6599_DMSO_30min	-0.212525	0.349897	-0.607392	18.2846	0.55106	0.889686
BHE40_HUMAN	O14503	Class E basic helix-loop-helix protein 40	BHLHE40	BHE40_HUMAN|O14503_K84	G-6599_DMSO_30min	-0.116274	0.258456	-0.449879	20.1584	0.657598	0.926507
BI1_HUMAN	P55061	Bax inhibitor 1	TMBIM6	BI1_HUMAN|P55061_K7	G-6599_DMSO_30min	-0.269825	0.302399	-0.892282	19.2489	0.383261	0.824931
BI2L1_HUMAN	Q9UHR4	Brain-specific angiogenesis inhibitor 1-associated protein 2-like protein 1	BAIAP2L1	BI2L1_HUMAN|Q9UHR4_K155	G-6599_DMSO_30min	-0.619797	0.259478	-2.38863	21.8122	0.026004	0.545928
BIP_HUMAN	P11021	NA	NA	BIP_HUMAN|P11021_K96	G-6599_DMSO_30min	-0.00265232	0.342085	-0.0077534	30.9675	0.993863	0.998234
BIP_HUMAN	P11021	NA	NA	BIP_HUMAN|P11021_K125	G-6599_DMSO_30min	-0.125108	0.384186	-0.325645	28.4543	0.747076	0.953513
BIP_HUMAN	P11021	NA	NA	BIP_HUMAN|P11021_K163	G-6599_DMSO_30min	-0.285298	0.318983	-0.894398	31.9722	0.377793	0.823239
BIP_HUMAN	P11021	NA	NA	BIP_HUMAN|P11021_K185	G-6599_DMSO_30min	-0.569617	0.33908	-1.67989	31.1281	0.102989	0.644436
BIP_HUMAN	P11021	NA	NA	BIP_HUMAN|P11021_K268	G-6599_DMSO_30min	-0.322893	0.358375	-0.900992	30.0219	0.374764	0.823137
BIP_HUMAN	P11021	NA	NA	BIP_HUMAN|P11021_K352	G-6599_DMSO_30min	-0.0729517	0.371674	-0.196279	29.2107	0.845751	0.974232
BIP_HUMAN	P11021	NA	NA	BIP_HUMAN|P11021_K573	G-6599_DMSO_30min	-0.0911251	0.382478	-0.238249	28.5563	0.813389	0.966647
BIP_HUMAN	P11021	NA	NA	BIP_HUMAN|P11021_K81	G-6599_DMSO_30min	-0.10517	0.379789	-0.276917	28.7179	0.783827	0.961941
BIRC2_HUMAN	Q13490	Baculoviral IAP repeat-containing protein 2	BIRC2	BIRC2_HUMAN|Q13490_K126	G-6599_DMSO_30min	-0.237355	0.581761	-0.407995	17.0391	0.688358	0.93739
BIRC2_HUMAN	Q13490	Baculoviral IAP repeat-containing protein 2	BIRC2	BIRC2_HUMAN|Q13490_K40	G-6599_DMSO_30min	0.179881	0.550637	0.326678	17.1355	0.747868	0.953513
BIRC2_HUMAN	Q13490	Baculoviral IAP repeat-containing protein 2	BIRC2	BIRC2_HUMAN|Q13490_K410	G-6599_DMSO_30min	-0.0117677	0.43831	-0.026848	17.6796	0.978882	0.997104
BIRC5_HUMAN	O15392	Baculoviral IAP repeat-containing protein 5	BIRC5	BIRC5_HUMAN|O15392_K23	G-6599_DMSO_30min	-0.262343	0.313997	-0.835494	19.2376	0.413696	0.831009
BIRC6_HUMAN	Q9NR09	Baculoviral IAP repeat-containing protein 6	BIRC6	BIRC6_HUMAN|Q9NR09_K2250	G-6599_DMSO_30min	0.100163	0.571548	0.175249	16.6086	0.863003	0.977298
BIRC6_HUMAN	Q9NR09	Baculoviral IAP repeat-containing protein 6	BIRC6	BIRC6_HUMAN|Q9NR09_K416	G-6599_DMSO_30min	-0.210585	0.25197	-0.835753	18.2619	0.414095	0.831147
BIRC6_HUMAN	Q9NR09	Baculoviral IAP repeat-containing protein 6	BIRC6	BIRC6_HUMAN|Q9NR09_K2260	G-6599_DMSO_30min	-0.323429	0.232018	-1.39399	18.6491	0.179711	0.7048
BIRC6_HUMAN	Q9NR09	Baculoviral IAP repeat-containing protein 6	BIRC6	BIRC6_HUMAN|Q9NR09_K2246	G-6599_DMSO_30min	-0.332558	0.261851	-1.27003	18.104	0.220157	0.734176
BIRC6_HUMAN	Q9NR09	Baculoviral IAP repeat-containing protein 6	BIRC6	BIRC6_HUMAN|Q9NR09_K2265	G-6599_DMSO_30min	-0.223849	0.24721	-0.905501	18.3452	0.376939	0.823239
BIRC6_HUMAN	Q9NR09	Baculoviral IAP repeat-containing protein 6	BIRC6	BIRC6_HUMAN|Q9NR09_K1643	G-6599_DMSO_30min	-0.249167	0.302565	-0.823513	17.6162	0.421226	0.836445
BIRC6_HUMAN	Q9NR09	Baculoviral IAP repeat-containing protein 6	BIRC6	BIRC6_HUMAN|Q9NR09_K2270	G-6599_DMSO_30min	-0.333957	0.252328	-1.3235	18.2558	0.202005	0.718566
BL1S1_HUMAN	P78537	Biogenesis of lysosome-related organelles complex 1 subunit 1	BLOC1S1	BL1S1_HUMAN|P78537_K145	G-6599_DMSO_30min	0.00573375	0.353227	0.0162325	17.2306	0.987235	0.997403
BL1S2_HUMAN	Q6QNY1	Biogenesis of lysosome-related organelles complex 1 subunit 2	BLOC1S2	BL1S2_HUMAN|Q6QNY1_K71	G-6599_DMSO_30min	-0.293515	0.272615	-1.07666	21.6596	0.293477	0.788092
BL1S2_HUMAN	Q6QNY1	Biogenesis of lysosome-related organelles complex 1 subunit 2	BLOC1S2	BL1S2_HUMAN|Q6QNY1_K92	G-6599_DMSO_30min	-0.449945	0.27479	-1.63742	21.5654	0.116054	0.658259
BL1S2_HUMAN	Q6QNY1	Biogenesis of lysosome-related organelles complex 1 subunit 2	BLOC1S2	BL1S2_HUMAN|Q6QNY1_K76	G-6599_DMSO_30min	-0.458443	0.261006	-1.75644	22.2064	0.0927962	0.635772
BMI1_HUMAN	P35226	Polycomb complex protein BMI-1	BMI1	BMI1_HUMAN|P35226_K73_K81	G-6599_DMSO_30min	-0.373037	0.371758	-1.00344	17.6569	0.329203	0.802715
BMI1_HUMAN	P35226	Polycomb complex protein BMI-1	BMI1	BMI1_HUMAN|P35226_K73	G-6599_DMSO_30min	0.0505058	0.349421	0.144541	17.8533	0.886692	0.984238
BMP7_HUMAN	P18075	Bone morphogenetic protein 7	BMP7	BMP7_HUMAN|P18075_K162	G-6599_DMSO_30min	0.0698036	0.59223	0.117866	17.1501	0.907544	0.988943
BMS1_HUMAN	Q14692	Ribosome biogenesis protein BMS1 homolog	BMS1	BMS1_HUMAN|Q14692_K124	G-6599_DMSO_30min	-0.317482	0.297149	-1.06843	23.2555	0.296293	0.789256
BMS1_HUMAN	Q14692	Ribosome biogenesis protein BMS1 homolog	BMS1	BMS1_HUMAN|Q14692_K728	G-6599_DMSO_30min	0.770736	0.65644	1.17411	17.5144	0.256067	0.759612
BMS1_HUMAN	Q14692	Ribosome biogenesis protein BMS1 homolog	BMS1	BMS1_HUMAN|Q14692_K1172	G-6599_DMSO_30min	-0.338893	0.289773	-1.16951	23.6551	0.253847	0.759168
BOD1_HUMAN	Q96IK1	Biorientation of chromosomes in cell division protein 1	BOD1	BOD1_HUMAN|Q96IK1_K161	G-6599_DMSO_30min	-0.240163	0.408189	-0.588361	17.5181	0.563799	0.893603
BOP1_HUMAN	Q14137	Ribosome biogenesis protein BOP1	BOP1	BOP1_HUMAN|Q14137_K253	G-6599_DMSO_30min	0.340826	0.376763	0.904616	18.269	0.377444	0.823239
BOP1_HUMAN	Q14137	Ribosome biogenesis protein BOP1	BOP1	BOP1_HUMAN|Q14137_K264	G-6599_DMSO_30min	0.594926	0.508089	1.17091	17.3243	0.25749	0.759612
BORC5_HUMAN	Q969J3	NA	NA	BORC5_HUMAN|Q969J3_K80	G-6599_DMSO_30min	-0.398223	0.27082	-1.47044	17.8806	0.158822	0.691565
BORC5_HUMAN	Q969J3	NA	NA	BORC5_HUMAN|Q969J3_K30	G-6599_DMSO_30min	-0.268841	0.382969	-0.701991	17.0374	0.492164	0.869056
BORC7_HUMAN	Q96B45	NA	NA	BORC7_HUMAN|Q96B45_K106	G-6599_DMSO_30min	0.255541	0.458976	0.556763	17.1139	0.584898	0.903488
BOREA_HUMAN	Q53HL2	Borealin	CDCA8	BOREA_HUMAN|Q53HL2_K158	G-6599_DMSO_30min	-0.763539	0.270329	-2.82448	18.6574	0.0109618	0.466658
BOREA_HUMAN	Q53HL2	Borealin	CDCA8	BOREA_HUMAN|Q53HL2_K225	G-6599_DMSO_30min	0.425867	0.659184	0.646052	14.5703	0.528291	0.886063
BOREA_HUMAN	Q53HL2	Borealin	CDCA8	BOREA_HUMAN|Q53HL2_K183	G-6599_DMSO_30min	-1.01363	0.216568	-4.68045	20.1384	0.000141418	0.0302549
BPHL_HUMAN	Q86WA6	Valacyclovir hydrolase	BPHL	BPHL_HUMAN|Q86WA6_K191	G-6599_DMSO_30min	-0.676434	0.421355	-1.60538	24.0507	0.121463	0.662325
BPTF_HUMAN	Q12830	Nucleosome-remodeling factor subunit BPTF	BPTF	BPTF_HUMAN|Q12830_K1541	G-6599_DMSO_30min	-0.450071	0.323701	-1.39039	17.2187	0.182122	0.7048
BPTF_HUMAN	Q12830	Nucleosome-remodeling factor subunit BPTF	BPTF	BPTF_HUMAN|Q12830_K1949	G-6599_DMSO_30min	-0.203183	0.37012	-0.548966	16.9815	0.590175	0.905657
BPTF_HUMAN	Q12830	Nucleosome-remodeling factor subunit BPTF	BPTF	BPTF_HUMAN|Q12830_K1844	G-6599_DMSO_30min	0.205174	0.481592	0.426034	16.6704	0.675533	0.932579
BRAP_HUMAN	Q7Z569	BRCA1-associated protein	BRAP	BRAP_HUMAN|Q7Z569_K385	G-6599_DMSO_30min	0.55687	0.604855	0.920666	16.5429	0.370456	0.821002
BRAP_HUMAN	Q7Z569	BRCA1-associated protein	BRAP	BRAP_HUMAN|Q7Z569_K381	G-6599_DMSO_30min	0.129309	0.282799	0.457246	17.7038	0.653056	0.925602
BRAP_HUMAN	Q7Z569	BRCA1-associated protein	BRAP	BRAP_HUMAN|Q7Z569_K545	G-6599_DMSO_30min	-0.385105	0.457684	-0.841422	16.7792	0.411943	0.830575
BRCA2_HUMAN	P51587	Breast cancer type 2 susceptibility protein	BRCA2	BRCA2_HUMAN|P51587_K3031	G-6599_DMSO_30min	-0.707331	0.374943	-1.8865	18.0364	0.0754334	0.616341
BRCC3_HUMAN	P46736	Lys-63-specific deubiquitinase BRCC36	BRCC3	BRCC3_HUMAN|P46736_K51	G-6599_DMSO_30min	-0.330529	0.358935	-0.920861	17.6696	0.369526	0.820652
BRCC3_HUMAN	P46736-2	Lys-63-specific deubiquitinase BRCC36 (isoform 2)	BRCC3	BRCC3_HUMAN|P46736-2_K180	G-6599_DMSO_30min	-0.389927	0.398025	-0.979653	17.3922	0.340689	0.806466
BRD2_HUMAN	P25440	Bromodomain-containing protein 2	BRD2	BRD2_HUMAN|P25440_K115	G-6599_DMSO_30min	-0.272136	0.357163	-0.761938	19.5445	0.455194	0.853715
BRD4_HUMAN	O60885	Bromodomain-containing protein 4	BRD4	BRD4_HUMAN|O60885_K645	G-6599_DMSO_30min	-0.254066	0.304042	-0.835629	17.6771	0.414516	0.831231
BRD4_HUMAN	O60885	Bromodomain-containing protein 4	BRD4	BRD4_HUMAN|O60885_K99	G-6599_DMSO_30min	-0.529274	0.282065	-1.87642	17.9221	0.0769785	0.617059
BRD7_HUMAN	Q9NPI1	Bromodomain-containing protein 7	BRD7	BRD7_HUMAN|Q9NPI1_K24	G-6599_DMSO_30min	0.213051	0.478358	0.445381	17.2209	0.661593	0.927846
BRD9_HUMAN	Q9H8M2	Bromodomain-containing protein 9	BRD9	BRD9_HUMAN|Q9H8M2_K529	G-6599_DMSO_30min	-0.219606	0.307253	-0.71474	17.3976	0.484251	0.867011
BRE1A_HUMAN	Q5VTR2	E3 ubiquitin-protein ligase BRE1A	RNF20	BRE1A_HUMAN|Q5VTR2_K399	G-6599_DMSO_30min	7.09e-05	0.383412	0.000184821	17.2529	0.999855	0.999892
BRE1A_HUMAN	Q5VTR2	E3 ubiquitin-protein ligase BRE1A	RNF20	BRE1A_HUMAN|Q5VTR2_K242	G-6599_DMSO_30min	0.0756924	0.32513	0.232806	17.6681	0.818588	0.967371
BRE1A_HUMAN	Q5VTR2	E3 ubiquitin-protein ligase BRE1A	RNF20	BRE1A_HUMAN|Q5VTR2_K959	G-6599_DMSO_30min	-0.165639	0.286746	-0.577652	18.0994	0.570616	0.896191
BRE1A_HUMAN	Q5VTR2	E3 ubiquitin-protein ligase BRE1A	RNF20	BRE1A_HUMAN|Q5VTR2_K256	G-6599_DMSO_30min	-0.179126	0.398364	-0.449654	17.1756	0.658583	0.92698
BRE1B_HUMAN	O75150	E3 ubiquitin-protein ligase BRE1B	RNF40	BRE1B_HUMAN|O75150_K420	G-6599_DMSO_30min	-0.514042	0.283311	-1.81441	19.2423	0.0852383	0.626271
BRK1_HUMAN	Q8WUW1	Protein BRICK1	BRK1	BRK1_HUMAN|Q8WUW1_K30	G-6599_DMSO_30min	-0.174643	0.277206	-0.630011	17.9553	0.536623	0.886063
BRK1_HUMAN	Q8WUW1	Protein BRICK1	BRK1	BRK1_HUMAN|Q8WUW1_K31	G-6599_DMSO_30min	0.0518669	0.596977	0.0868826	16.5892	0.931805	0.991061
BRMS1_HUMAN	Q9HCU9	Breast cancer metastasis-suppressor 1	BRMS1	BRMS1_HUMAN|Q9HCU9_K133	G-6599_DMSO_30min	0.169756	0.297883	0.569873	19.2599	0.575351	0.897576
BROX_HUMAN	Q5VW32	BRO1 domain-containing protein BROX	BROX	BROX_HUMAN|Q5VW32_K141	G-6599_DMSO_30min	0.423466	0.570843	0.741825	17.334	0.468126	0.860294
BROX_HUMAN	Q5VW32	BRO1 domain-containing protein BROX	BROX	BROX_HUMAN|Q5VW32_K317	G-6599_DMSO_30min	-0.152073	0.277133	-0.548738	21.3527	0.588877	0.905026
BT3L4_HUMAN	Q96K17	Transcription factor BTF3 homolog 4	BTF3L4	BT3L4_HUMAN|Q96K17_K37	G-6599_DMSO_30min	0.0725709	0.420469	0.172595	17.4761	0.864953	0.978662
BTBD1_HUMAN	Q9H0C5	BTB/POZ domain-containing protein 1	BTBD1	BTBD1_HUMAN|Q9H0C5_K264	G-6599_DMSO_30min	-0.123888	0.234755	-0.527734	19.8555	0.603532	0.909292
BTBD1_HUMAN	Q9H0C5	BTB/POZ domain-containing protein 1	BTBD1	BTBD1_HUMAN|Q9H0C5_K439	G-6599_DMSO_30min	-0.255432	0.248666	-1.02721	19.4317	0.31694	0.796127
BTBD2_HUMAN	Q9BX70	BTB/POZ domain-containing protein 2	BTBD2	BTBD2_HUMAN|Q9BX70_K100	G-6599_DMSO_30min	-0.49895	0.293739	-1.69861	18.235	0.106389	0.645285
BTBD9_HUMAN	Q96Q07	BTB/POZ domain-containing protein 9	BTBD9	BTBD9_HUMAN|Q96Q07_K288	G-6599_DMSO_30min	0.0680589	0.332855	0.20447	24.2434	0.839693	0.972848
BTBDA_HUMAN	Q9BSF8	BTB/POZ domain-containing protein 10	BTBD10	BTBDA_HUMAN|Q9BSF8_K233	G-6599_DMSO_30min	-0.0904659	0.249467	-0.362637	20.8648	0.720524	0.945847
BTBDA_HUMAN	Q9BSF8	BTB/POZ domain-containing protein 10	BTBD10	BTBDA_HUMAN|Q9BSF8_K157	G-6599_DMSO_30min	-0.358868	0.413476	-0.867931	17.8058	0.396979	0.824931
BTF3_HUMAN	P20290	Transcription factor BTF3	BTF3	BTF3_HUMAN|P20290_K87	G-6599_DMSO_30min	-0.079053	0.277862	-0.284505	25.3727	0.778333	0.959746
BTF3_HUMAN	P20290	Transcription factor BTF3	BTF3	BTF3_HUMAN|P20290_K54	G-6599_DMSO_30min	0.266398	0.55105	0.483437	18.3001	0.634519	0.919517
BTF3_HUMAN	P20290	Transcription factor BTF3	BTF3	BTF3_HUMAN|P20290_K93	G-6599_DMSO_30min	-0.399019	0.279435	-1.42795	25.2626	0.165552	0.69168
BTF3_HUMAN	P20290	Transcription factor BTF3	BTF3	BTF3_HUMAN|P20290_K171	G-6599_DMSO_30min	0.980349	0.91547	1.07087	16.9544	0.299236	0.790337
BUB1_HUMAN	O43683	Mitotic checkpoint serine/threonine-protein kinase BUB1	BUB1	BUB1_HUMAN|O43683_K292	G-6599_DMSO_30min	-0.38217	0.234811	-1.62756	20.5893	0.118825	0.661555
BUB1_HUMAN	O43683	Mitotic checkpoint serine/threonine-protein kinase BUB1	BUB1	BUB1_HUMAN|O43683_K958	G-6599_DMSO_30min	-0.301342	0.259754	-1.1601	19.7303	0.259853	0.761772
BUB1_HUMAN	O43683	Mitotic checkpoint serine/threonine-protein kinase BUB1	BUB1	BUB1_HUMAN|O43683_K290	G-6599_DMSO_30min	-0.195716	0.268922	-0.72778	19.4779	0.475407	0.863091
BUB1_HUMAN	O43683	Mitotic checkpoint serine/threonine-protein kinase BUB1	BUB1	BUB1_HUMAN|O43683_K239	G-6599_DMSO_30min	-0.32998	0.325869	-1.01261	18.3865	0.324385	0.800192
BUB1B_HUMAN	O60566	Mitotic checkpoint serine/threonine-protein kinase BUB1 beta	BUB1B	BUB1B_HUMAN|O60566_K475	G-6599_DMSO_30min	-0.292823	0.409891	-0.714393	19.8699	0.483293	0.866642
BUB3_HUMAN	O43684	Mitotic checkpoint protein BUB3	BUB3	BUB3_HUMAN|O43684_K322	G-6599_DMSO_30min	-0.400962	0.317284	-1.26373	17.4706	0.222929	0.735751
BUB3_HUMAN	O43684	Mitotic checkpoint protein BUB3	BUB3	BUB3_HUMAN|O43684_K139	G-6599_DMSO_30min	-0.0722083	0.317955	-0.227102	17.4652	0.822981	0.968085
BUB3_HUMAN	O43684	Mitotic checkpoint protein BUB3	BUB3	BUB3_HUMAN|O43684_K216	G-6599_DMSO_30min	-0.348742	0.356562	-0.978068	17.2054	0.341594	0.806466
BUD23_HUMAN	O43709	NA	NA	BUD23_HUMAN|O43709_K196	G-6599_DMSO_30min	-0.611423	0.246652	-2.47888	20.8084	0.021832	0.529953
BUD31_HUMAN	P41223	Protein BUD31 homolog	BUD31	BUD31_HUMAN|P41223_K80	G-6599_DMSO_30min	-0.166687	0.508234	-0.327973	17.1804	0.746895	0.953513
BUD31_HUMAN	P41223	Protein BUD31 homolog	BUD31	BUD31_HUMAN|P41223_K94	G-6599_DMSO_30min	-0.546353	0.28265	-1.93296	19.4813	0.0679091	0.596256
BUD31_HUMAN	P41223	Protein BUD31 homolog	BUD31	BUD31_HUMAN|P41223_K40	G-6599_DMSO_30min	-0.669192	0.375719	-1.7811	18.0069	0.0917725	0.635772
BUD31_HUMAN	P41223	Protein BUD31 homolog	BUD31	BUD31_HUMAN|P41223_K28	G-6599_DMSO_30min	-0.356006	0.35788	-0.994764	18.1979	0.332895	0.804621
BUD31_HUMAN	P41223	Protein BUD31 homolog	BUD31	BUD31_HUMAN|P41223_K86	G-6599_DMSO_30min	-0.241411	0.510905	-0.472516	17.1703	0.642509	0.922083
C19L1_HUMAN	Q69YN2	CWF19-like protein 1	CWF19L1	C19L1_HUMAN|Q69YN2_K297	G-6599_DMSO_30min	-0.416506	0.381323	-1.09227	17.4982	0.289527	0.783787
C1D_HUMAN	Q13901	Nuclear nucleic acid-binding protein C1D	C1D	C1D_HUMAN|Q13901_K46	G-6599_DMSO_30min	0.139423	0.320478	0.435045	17.2083	0.668936	0.930096
C1TC_HUMAN	P11586	C-1-tetrahydrofolate synthase, cytoplasmic	MTHFD1	C1TC_HUMAN|P11586_K553	G-6599_DMSO_30min	-0.44096	0.281185	-1.56822	19.9823	0.13253	0.667972
C1TC_HUMAN	P11586	C-1-tetrahydrofolate synthase, cytoplasmic	MTHFD1	C1TC_HUMAN|P11586_K588	G-6599_DMSO_30min	-0.238068	0.288677	-0.824684	19.7745	0.419388	0.835197
C1TC_HUMAN	P11586	C-1-tetrahydrofolate synthase, cytoplasmic	MTHFD1	C1TC_HUMAN|P11586_K543	G-6599_DMSO_30min	-0.158473	0.255007	-0.621445	20.8734	0.541035	0.887278
C2CD5_HUMAN	Q86YS7	C2 domain-containing protein 5	C2CD5	C2CD5_HUMAN|Q86YS7_K806	G-6599_DMSO_30min	-0.24758	0.259283	-0.954861	22.1145	0.34997	0.811945
C2D1B_HUMAN	Q5T0F9	Coiled-coil and C2 domain-containing protein 1B	CC2D1B	C2D1B_HUMAN|Q5T0F9_K555	G-6599_DMSO_30min	-0.875011	0.246552	-3.54898	19.2279	0.00211194	0.294135
C2D2A_HUMAN	Q9P2K1	Coiled-coil and C2 domain-containing protein 2A	CC2D2A	C2D2A_HUMAN|Q9P2K1_K958	G-6599_DMSO_30min	-0.341029	0.231599	-1.47249	25.6557	0.15305	0.684464
C42S2_HUMAN	Q9NRR3	CDC42 small effector protein 2	CDC42SE2	C42S2_HUMAN|Q9NRR3_K82	G-6599_DMSO_30min	-0.591948	0.352661	-1.67852	17.4423	0.11107	0.650599
CA021_HUMAN	Q9H246	Uncharacterized protein C1orf21	C1orf21	CA021_HUMAN|Q9H246_K22	G-6599_DMSO_30min	-0.604186	0.32387	-1.86552	18.6988	0.0778781	0.619252
CA043_HUMAN	Q9BWL3	Uncharacterized protein C1orf43	C1orf43	CA043_HUMAN|Q9BWL3_K73	G-6599_DMSO_30min	0.428432	0.449578	0.952964	17.8127	0.353362	0.813758
CA109_HUMAN	Q9NX04	Uncharacterized protein C1orf109	C1orf109	CA109_HUMAN|Q9NX04_K76	G-6599_DMSO_30min	-0.195354	0.313408	-0.62332	31.6787	0.537537	0.886177
CA2D3_HUMAN	Q8IZS8	Voltage-dependent calcium channel subunit alpha-2/delta-3	CACNA2D3	CA2D3_HUMAN|Q8IZS8_K963	G-6599_DMSO_30min	-0.0837989	0.384706	-0.217826	19.9933	0.829773	0.9692
CA2D3_HUMAN	Q8IZS8	Voltage-dependent calcium channel subunit alpha-2/delta-3	CACNA2D3	CA2D3_HUMAN|Q8IZS8_K983	G-6599_DMSO_30min	0.434394	0.698087	0.622263	17.3018	0.541883	0.888194
CA2D3_HUMAN	Q8IZS8	Voltage-dependent calcium channel subunit alpha-2/delta-3	CACNA2D3	CA2D3_HUMAN|Q8IZS8_K961_K963	G-6599_DMSO_30min	-0.210114	0.279866	-0.750765	23.7974	0.460154	0.856583
CAAP1_HUMAN	Q9H8G2	Caspase activity and apoptosis inhibitor 1	CAAP1	CAAP1_HUMAN|Q9H8G2_K189	G-6599_DMSO_30min	-0.474198	0.258027	-1.83778	18.0121	0.0826474	0.623906
CAB39_HUMAN	Q9Y376	Calcium-binding protein 39	CAB39	CAB39_HUMAN|Q9Y376_K301	G-6599_DMSO_30min	-0.245698	0.240605	-1.02117	19.9967	0.319371	0.798557
CAB39_HUMAN	Q9Y376	Calcium-binding protein 39	CAB39	CAB39_HUMAN|Q9Y376_K297	G-6599_DMSO_30min	-0.488181	0.297885	-1.63882	18.6123	0.118044	0.660817
CAB45_HUMAN	Q9BRK5	45 kDa calcium-binding protein	SDF4	CAB45_HUMAN|Q9BRK5_K163	G-6599_DMSO_30min	0.186816	0.316929	0.589457	20.1325	0.562112	0.893163
CABL1_HUMAN	Q8TDN4	CDK5 and ABL1 enzyme substrate 1	CABLES1	CABL1_HUMAN|Q8TDN4_K366	G-6599_DMSO_30min	-0.178633	0.395578	-0.451574	18.1487	0.656926	0.926309
CACO2_HUMAN	Q13137	Calcium-binding and coiled-coil domain-containing protein 2	CALCOCO2	CACO2_HUMAN|Q13137_K312	G-6599_DMSO_30min	-0.0273214	0.393951	-0.0693522	17.6875	0.945487	0.992114
CACO2_HUMAN	Q13137	Calcium-binding and coiled-coil domain-containing protein 2	CALCOCO2	CACO2_HUMAN|Q13137_K298	G-6599_DMSO_30min	-0.48119	0.280411	-1.71602	19.2158	0.102238	0.642361
CAD11_HUMAN	P55287	Cadherin-11	CDH11	CAD11_HUMAN|P55287_K781	G-6599_DMSO_30min	-0.16405	0.259432	-0.632345	18.8867	0.534742	0.886063
CADM1_HUMAN	Q9BY67	Cell adhesion molecule 1	CADM1	CADM1_HUMAN|Q9BY67_K437	G-6599_DMSO_30min	0.0473835	0.561755	0.0843491	17.1964	0.933753	0.991061
CADM1_HUMAN	Q9BY67	Cell adhesion molecule 1	CADM1	CADM1_HUMAN|Q9BY67_K438	G-6599_DMSO_30min	-0.186408	0.468684	-0.397727	17.6343	0.695605	0.938362
CADM4_HUMAN	Q8NFZ8	Cell adhesion molecule 4	CADM4	CADM4_HUMAN|Q8NFZ8_K381	G-6599_DMSO_30min	-0.521738	0.28397	-1.8373	19.4992	0.0814552	0.621369
CAF1B_HUMAN	Q13112	Chromatin assembly factor 1 subunit B	CHAF1B	CAF1B_HUMAN|Q13112_K202	G-6599_DMSO_30min	-0.462801	0.251962	-1.83679	22.1492	0.0796987	0.619603
CAF1B_HUMAN	Q13112	Chromatin assembly factor 1 subunit B	CHAF1B	CAF1B_HUMAN|Q13112_K211	G-6599_DMSO_30min	-0.356645	0.318822	-1.11863	19.7669	0.276707	0.775575
CAF1B_HUMAN	Q13112	Chromatin assembly factor 1 subunit B	CHAF1B	CAF1B_HUMAN|Q13112_K275	G-6599_DMSO_30min	-0.422187	0.259013	-1.62999	21.7997	0.11747	0.660532
CALM1_HUMAN	P0DP23	NA	NA	CALM1_HUMAN|P0DP23_K78	G-6599_DMSO_30min	0.0893187	0.67207	0.132901	18.4297	0.895712	0.98684
CALM1_HUMAN	P0DP23	NA	NA	CALM1_HUMAN|P0DP23_K31	G-6599_DMSO_30min	-0.254108	0.299166	-0.849389	28.701	0.402695	0.827158
CALM1_HUMAN	P0DP23	NA	NA	CALM1_HUMAN|P0DP23_K95	G-6599_DMSO_30min	-0.11669	1.40523	-0.08304	15.6821	0.93487	0.991061
CALR_HUMAN	P27797	Calreticulin	CALR	CALR_HUMAN|P27797_K153	G-6599_DMSO_30min	-0.0806915	0.329109	-0.245182	31.3428	0.807914	0.965513
CALX_HUMAN	P27824	Calnexin	CANX	CALX_HUMAN|P27824_K127	G-6599_DMSO_30min	-0.3381	0.500264	-0.675842	30.9855	0.504154	0.874163
CALX_HUMAN	P27824	Calnexin	CANX	CALX_HUMAN|P27824_K507	G-6599_DMSO_30min	-0.71303	0.446381	-1.59736	25.7617	0.122381	0.662868
CALX_HUMAN	P27824	Calnexin	CANX	CALX_HUMAN|P27824_K210	G-6599_DMSO_30min	-0.0348566	0.635586	-0.0548417	30.1824	0.956626	0.994127
CALX_HUMAN	P27824	Calnexin	CANX	CALX_HUMAN|P27824_K61	G-6599_DMSO_30min	-0.622956	0.698705	-0.891587	28.0506	0.380199	0.824357
CALX_HUMAN	P27824	Calnexin	CANX	CALX_HUMAN|P27824_K217	G-6599_DMSO_30min	-0.658149	0.474437	-1.38722	29.0465	0.175927	0.700356
CALX_HUMAN	P27824	Calnexin	CANX	CALX_HUMAN|P27824_K199	G-6599_DMSO_30min	-0.591182	0.491716	-1.20228	30.459	0.238517	0.748838
CALX_HUMAN	P27824	Calnexin	CANX	CALX_HUMAN|P27824_K87	G-6599_DMSO_30min	-0.704808	0.522734	-1.34831	31.8743	0.187062	0.706959
CALX_HUMAN	P27824	Calnexin	CANX	CALX_HUMAN|P27824_K515	G-6599_DMSO_30min	-0.676227	0.476304	-1.41974	29.2221	0.166264	0.692793
CAMP1_HUMAN	Q5T5Y3	Calmodulin-regulated spectrin-associated protein 1	CAMSAP1	CAMP1_HUMAN|Q5T5Y3_K912	G-6599_DMSO_30min	-0.33572	0.283015	-1.18623	19.1432	0.250048	0.757526
CAMP2_HUMAN	Q08AD1	Calmodulin-regulated spectrin-associated protein 2	CAMSAP2	CAMP2_HUMAN|Q08AD1_K803	G-6599_DMSO_30min	-0.0379174	0.52432	-0.0723174	17.3083	0.943178	0.992029
CAN15_HUMAN	O75808	Calpain-15	CAPN15	CAN15_HUMAN|O75808_K618	G-6599_DMSO_30min	0.077357	0.225202	0.343501	21.9426	0.734491	0.94957
CAN15_HUMAN	O75808	Calpain-15	CAPN15	CAN15_HUMAN|O75808_K32	G-6599_DMSO_30min	0.619134	0.518796	1.19341	16.1422	0.249956	0.757526
CAN2_HUMAN	P17655	Calpain-2 catalytic subunit	CAPN2	CAN2_HUMAN|P17655_K219	G-6599_DMSO_30min	-0.236205	0.266658	-0.885796	19.7441	0.386389	0.824931
CAN2_HUMAN	P17655	Calpain-2 catalytic subunit	CAPN2	CAN2_HUMAN|P17655_K674	G-6599_DMSO_30min	-0.259203	0.23647	-1.09613	20.7942	0.285554	0.78192
CAN2_HUMAN	P17655	Calpain-2 catalytic subunit	CAPN2	CAN2_HUMAN|P17655_K414	G-6599_DMSO_30min	-0.785837	0.632344	-1.24274	16.8116	0.231019	0.741026
CAN2_HUMAN	P17655	Calpain-2 catalytic subunit	CAPN2	CAN2_HUMAN|P17655_K637	G-6599_DMSO_30min	-0.293036	0.273286	-1.07227	19.5626	0.296649	0.789528
CAN5_HUMAN	O15484	Calpain-5	CAPN5	CAN5_HUMAN|O15484_K276	G-6599_DMSO_30min	1.61285	1.85896	0.86761	14.332	0.399902	0.825464
CAN7_HUMAN	Q9Y6W3	Calpain-7	CAPN7	CAN7_HUMAN|Q9Y6W3_K247	G-6599_DMSO_30min	0.0302152	0.235032	0.128558	19.3958	0.899031	0.987951
CANB1_HUMAN	P63098	Calcineurin subunit B type 1	PPP3R1	CANB1_HUMAN|P63098_K125	G-6599_DMSO_30min	-0.303302	0.335216	-0.904796	18.1427	0.377432	0.823239
CANB1_HUMAN	P63098	Calcineurin subunit B type 1	PPP3R1	CANB1_HUMAN|P63098_K85	G-6599_DMSO_30min	-0.286177	0.371776	-0.769755	17.7704	0.451557	0.853715
CAND1_HUMAN	Q86VP6	Cullin-associated NEDD8-dissociated protein 1	CAND1	CAND1_HUMAN|Q86VP6_K826	G-6599_DMSO_30min	-0.493333	0.276935	-1.7814	18.2359	0.091509	0.635772
CAND1_HUMAN	Q86VP6	Cullin-associated NEDD8-dissociated protein 1	CAND1	CAND1_HUMAN|Q86VP6_K957	G-6599_DMSO_30min	0.7087	0.698528	1.01456	16.532	0.324934	0.800192
CAND1_HUMAN	Q86VP6	Cullin-associated NEDD8-dissociated protein 1	CAND1	CAND1_HUMAN|Q86VP6_K1163	G-6599_DMSO_30min	-0.245347	0.2315	-1.05981	19.1646	0.302404	0.792841
CAP1_HUMAN	Q01518	Adenylyl cyclase-associated protein 1	CAP1	CAP1_HUMAN|Q01518_K398	G-6599_DMSO_30min	-0.240823	0.314171	-0.766537	17.1256	0.453795	0.853715
CAPR1_HUMAN	Q14444	Caprin-1	CAPRIN1	CAPR1_HUMAN|Q14444_K110	G-6599_DMSO_30min	0.0747521	0.46551	0.160581	17.4664	0.874266	0.980567
CAPR1_HUMAN	Q14444	Caprin-1	CAPRIN1	CAPR1_HUMAN|Q14444_K125	G-6599_DMSO_30min	-0.177974	0.272874	-0.652222	20.055	0.521664	0.884199
CAPR1_HUMAN	Q14444	Caprin-1	CAPRIN1	CAPR1_HUMAN|Q14444_K63	G-6599_DMSO_30min	-0.564097	0.282633	-1.99586	19.7745	0.0599079	0.595573
CAPR1_HUMAN	Q14444	Caprin-1	CAPRIN1	CAPR1_HUMAN|Q14444_K98	G-6599_DMSO_30min	0.0163341	0.330233	0.0494623	18.7682	0.961073	0.994505
CAPZB_HUMAN	P47756	F-actin-capping protein subunit beta	CAPZB	CAPZB_HUMAN|P47756_K235	G-6599_DMSO_30min	-0.293554	0.231673	-1.26711	19.986	0.219683	0.734176
CAPZB_HUMAN	P47756-2	F-actin-capping protein subunit beta (isoform 2)	CAPZB	CAPZB_HUMAN|P47756-2_K254	G-6599_DMSO_30min	-0.0301807	0.476769	-0.0633027	17.0565	0.950261	0.9932
CAPZB_HUMAN	P47756-2	F-actin-capping protein subunit beta (isoform 2)	CAPZB	CAPZB_HUMAN|P47756-2_K252	G-6599_DMSO_30min	-0.449296	0.268969	-1.67044	18.9539	0.111264	0.650599
CAR10_HUMAN	Q9BWT7	Caspase recruitment domain-containing protein 10	CARD10	CAR10_HUMAN|Q9BWT7_K378	G-6599_DMSO_30min	-0.426224	0.310712	-1.37177	31.8108	0.179734	0.7048
CAR10_HUMAN	Q9BWT7	Caspase recruitment domain-containing protein 10	CARD10	CAR10_HUMAN|Q9BWT7_K917	G-6599_DMSO_30min	-0.905842	0.315208	-2.87379	31.6259	0.00719034	0.462987
CARF_HUMAN	Q9NXV6	CDKN2A-interacting protein	CDKN2AIP	CARF_HUMAN|Q9NXV6_K423	G-6599_DMSO_30min	-0.664126	0.258587	-2.56828	21.174	0.0178462	0.519033
CARM1_HUMAN	Q86X55	Histone-arginine methyltransferase CARM1	CARM1	CARM1_HUMAN|Q86X55_K81	G-6599_DMSO_30min	-0.905024	0.303889	-2.97814	18.6476	0.00783903	0.462987
CASC3_HUMAN	O15234	Protein CASC3	CASC3	CASC3_HUMAN|O15234_K185	G-6599_DMSO_30min	0.0476493	0.315418	0.151067	19.2868	0.881491	0.983654
CASP_HUMAN	Q13948	Protein CASP	CUX1	CASP_HUMAN|Q13948_K552	G-6599_DMSO_30min	-0.37228	0.254331	-1.46376	17.7061	0.160787	0.69168
CASP_HUMAN	Q13948	Protein CASP	CUX1	CASP_HUMAN|Q13948_K593	G-6599_DMSO_30min	-0.00330649	0.274564	-0.0120427	17.4894	0.990528	0.99744
CASP_HUMAN	Q13948	Protein CASP	CUX1	CASP_HUMAN|Q13948_K69	G-6599_DMSO_30min	-0.325397	0.28004	-1.16197	17.4391	0.260904	0.762312
CASP9_HUMAN	P55211	Caspase-9	CASP9	CASP9_HUMAN|P55211_K394	G-6599_DMSO_30min	-0.51306	0.312639	-1.64106	25.2855	0.113167	0.652347
CATB_HUMAN	P07858	Cathepsin B	CTSB	CATB_HUMAN|P07858_K220	G-6599_DMSO_30min	-0.244951	0.307545	-0.796473	19.8162	0.435196	0.844938
CATD_HUMAN	P07339	Cathepsin D	CTSD	CATD_HUMAN|P07339_K127	G-6599_DMSO_30min	-0.191271	0.315117	-0.606983	18.8148	0.551117	0.889686
CATIN_HUMAN	Q8WUQ7	Cactin	CACTIN	CATIN_HUMAN|Q8WUQ7_K219	G-6599_DMSO_30min	-0.471163	0.28465	-1.65523	19.9394	0.113533	0.652653
CATIN_HUMAN	Q8WUQ7	Cactin	CACTIN	CATIN_HUMAN|Q8WUQ7_K306	G-6599_DMSO_30min	-0.289489	0.231225	-1.25198	22.0778	0.223679	0.736476
CATIN_HUMAN	Q8WUQ7	Cactin	CACTIN	CATIN_HUMAN|Q8WUQ7_K424	G-6599_DMSO_30min	-0.236778	0.324116	-0.730535	19.0347	0.47396	0.863091
CAV1_HUMAN	Q03135	Caveolin-1	CAV1	CAV1_HUMAN|Q03135_K39	G-6599_DMSO_30min	-0.312538	0.330948	-0.944373	18.527	0.357133	0.815854
CAV1_HUMAN	Q03135	Caveolin-1	CAV1	CAV1_HUMAN|Q03135_K47	G-6599_DMSO_30min	-0.0806188	0.340234	-0.236951	18.3964	0.815313	0.966647
CAV1_HUMAN	Q03135	Caveolin-1	CAV1	CAV1_HUMAN|Q03135_K26	G-6599_DMSO_30min	-0.413047	0.267549	-1.54382	19.8517	0.138425	0.671034
CAVN1_HUMAN	Q6NZI2	NA	NA	CAVN1_HUMAN|Q6NZI2_K95	G-6599_DMSO_30min	-0.0406273	0.417447	-0.0973233	18.39	0.923523	0.991061
CAVN1_HUMAN	Q6NZI2	NA	NA	CAVN1_HUMAN|Q6NZI2_K299	G-6599_DMSO_30min	-0.719941	0.342023	-2.10495	19.5343	0.0484527	0.57658
CAVN1_HUMAN	Q6NZI2	NA	NA	CAVN1_HUMAN|Q6NZI2_K327	G-6599_DMSO_30min	-0.721262	0.325776	-2.21398	19.9008	0.0386724	0.553837
CAVN1_HUMAN	Q6NZI2	NA	NA	CAVN1_HUMAN|Q6NZI2_K337	G-6599_DMSO_30min	-0.343147	0.439383	-0.780974	18.1691	0.444875	0.851935
CAVN1_HUMAN	Q6NZI2	NA	NA	CAVN1_HUMAN|Q6NZI2_K317	G-6599_DMSO_30min	-0.699488	0.337633	-2.07174	19.6277	0.051692	0.585164
CAVN1_HUMAN	Q6NZI2	NA	NA	CAVN1_HUMAN|Q6NZI2_K161	G-6599_DMSO_30min	-0.284419	0.289848	-0.98127	20.9661	0.337648	0.806045
CAVN1_HUMAN	Q6NZI2	NA	NA	CAVN1_HUMAN|Q6NZI2_K116	G-6599_DMSO_30min	-0.0926118	0.290358	-0.318957	20.9478	0.752918	0.953938
CAVN1_HUMAN	Q6NZI2	NA	NA	CAVN1_HUMAN|Q6NZI2_K152	G-6599_DMSO_30min	-0.312576	0.314789	-0.992972	20.1847	0.332479	0.804037
CAZA1_HUMAN	P52907	F-actin-capping protein subunit alpha-1	CAPZA1	CAZA1_HUMAN|P52907_K166	G-6599_DMSO_30min	-0.487105	0.357262	-1.36344	17.4046	0.190121	0.706959
CAZA1_HUMAN	P52907	F-actin-capping protein subunit alpha-1	CAPZA1	CAZA1_HUMAN|P52907_K19	G-6599_DMSO_30min	-0.383045	0.450311	-0.850624	16.9607	0.406827	0.828629
CAZA1_HUMAN	P52907	F-actin-capping protein subunit alpha-1	CAPZA1	CAZA1_HUMAN|P52907_K273	G-6599_DMSO_30min	-0.250463	0.258006	-0.970767	18.5484	0.344154	0.807831
CAZA1_HUMAN	P52907	F-actin-capping protein subunit alpha-1	CAPZA1	CAZA1_HUMAN|P52907_K210	G-6599_DMSO_30min	-0.118602	0.333925	-0.355177	17.5807	0.726682	0.947873
CAZA2_HUMAN	P47755	F-actin-capping protein subunit alpha-2	CAPZA2	CAZA2_HUMAN|P47755_K19	G-6599_DMSO_30min	0.00492309	0.629898	0.0078157	16.542	0.993858	0.998234
CAZA2_HUMAN	P47755	F-actin-capping protein subunit alpha-2	CAPZA2	CAZA2_HUMAN|P47755_K166	G-6599_DMSO_30min	-0.405919	0.308442	-1.31603	17.5652	0.205082	0.723174
CB072_HUMAN	A6NCS6	Uncharacterized protein C2orf72	C2orf72	CB072_HUMAN|A6NCS6_K237	G-6599_DMSO_30min	-0.127473	0.276583	-0.460886	18.6432	0.650212	0.924763
CBP_HUMAN	Q92793	CREB-binding protein	CREBBP	CBP_HUMAN|Q92793_K1806	G-6599_DMSO_30min	-0.421044	0.265569	-1.58544	23.6864	0.126127	0.665478
CBP_HUMAN	Q92793	CREB-binding protein	CREBBP	CBP_HUMAN|Q92793_K1520	G-6599_DMSO_30min	0.352762	0.380907	0.926111	19.6128	0.365645	0.819217
CBPD_HUMAN	O75976	Carboxypeptidase D	CPD	CBPD_HUMAN|O75976_K1356	G-6599_DMSO_30min	-0.396025	0.256708	-1.5427	18.7339	0.139626	0.673346
CBX1_HUMAN	P83916	Chromobox protein homolog 1	CBX1	CBX1_HUMAN|P83916_K150	G-6599_DMSO_30min	0.480895	0.713885	0.673631	16.4462	0.509903	0.875983
CBX1_HUMAN	P83916	Chromobox protein homolog 1	CBX1	CBX1_HUMAN|P83916_K41	G-6599_DMSO_30min	-0.25095	0.226075	-1.11003	18.497	0.281211	0.778338
CBX1_HUMAN	P83916	Chromobox protein homolog 1	CBX1	CBX1_HUMAN|P83916_K155	G-6599_DMSO_30min	0.0117921	0.328457	0.0359014	17.2709	0.971773	0.996087
CBX1_HUMAN	P83916	Chromobox protein homolog 1	CBX1	CBX1_HUMAN|P83916_K35	G-6599_DMSO_30min	-0.216457	0.219944	-0.984146	18.633	0.337651	0.806045
CBX1_HUMAN	P83916	Chromobox protein homolog 1	CBX1	CBX1_HUMAN|P83916_K137	G-6599_DMSO_30min	0.315745	0.698496	0.452035	16.4558	0.657145	0.926309
CBX2_HUMAN	Q14781	Chromobox protein homolog 2	CBX2	CBX2_HUMAN|Q14781_K277	G-6599_DMSO_30min	0.0908341	0.896277	0.101346	16.7281	0.920481	0.991061
CBX3_HUMAN	Q13185	Chromobox protein homolog 3	CBX3	CBX3_HUMAN|Q13185_K103	G-6599_DMSO_30min	-0.0241469	0.376548	-0.0641269	18.0169	0.949575	0.992994
CBX3_HUMAN	Q13185	Chromobox protein homolog 3	CBX3	CBX3_HUMAN|Q13185_K159	G-6599_DMSO_30min	-0.130731	0.398049	-0.328429	17.8211	0.746415	0.953513
CBX3_HUMAN	Q13185	Chromobox protein homolog 3	CBX3	CBX3_HUMAN|Q13185_K50	G-6599_DMSO_30min	-0.163588	0.255258	-0.640872	20.3278	0.528765	0.886063
CBX3_HUMAN	Q13185	Chromobox protein homolog 3	CBX3	CBX3_HUMAN|Q13185_K154	G-6599_DMSO_30min	-0.179488	0.598778	-0.299758	16.9166	0.768014	0.958718
CBX3_HUMAN	Q13185	Chromobox protein homolog 3	CBX3	CBX3_HUMAN|Q13185_K44	G-6599_DMSO_30min	-0.490385	0.267375	-1.83407	19.9349	0.0816163	0.621978
CBX5_HUMAN	P45973	Chromobox protein homolog 5	CBX5	CBX5_HUMAN|P45973_K154	G-6599_DMSO_30min	0.0374056	0.496474	0.0753425	17.5896	0.940793	0.991365
CBX5_HUMAN	P45973	Chromobox protein homolog 5	CBX5	CBX5_HUMAN|P45973_K40	G-6599_DMSO_30min	-0.242154	0.261529	-0.925918	21.5731	0.364731	0.819217
CBX5_HUMAN	P45973	Chromobox protein homolog 5	CBX5	CBX5_HUMAN|P45973_K32	G-6599_DMSO_30min	-0.650963	0.306166	-2.12618	20.0152	0.0461214	0.570737
CBX5_HUMAN	P45973	Chromobox protein homolog 5	CBX5	CBX5_HUMAN|P45973_K125	G-6599_DMSO_30min	0.811125	1.16767	0.694653	16.4692	0.496957	0.871587
CBX5_HUMAN	P45973	Chromobox protein homolog 5	CBX5	CBX5_HUMAN|P45973_K91	G-6599_DMSO_30min	0.549801	0.693887	0.792349	16.9138	0.43913	0.847644
CBX5_HUMAN	P45973	Chromobox protein homolog 5	CBX5	CBX5_HUMAN|P45973_K68	G-6599_DMSO_30min	-0.178483	0.409005	-0.436383	18.2683	0.667673	0.929231
CBX5_HUMAN	P45973	Chromobox protein homolog 5	CBX5	CBX5_HUMAN|P45973_K159	G-6599_DMSO_30min	0.0527497	0.329788	0.15995	19.4534	0.874569	0.98061
CBX6_HUMAN	O95503	Chromobox protein homolog 6	CBX6	CBX6_HUMAN|O95503_K179	G-6599_DMSO_30min	-0.154478	0.316085	-0.488724	21.7363	0.629932	0.917951
CC038_HUMAN	Q5JPI3	Uncharacterized protein C3orf38	C3orf38	CC038_HUMAN|Q5JPI3_K108	G-6599_DMSO_30min	0.0337512	0.350614	0.0962631	17.978	0.924377	0.991061
CC038_HUMAN	Q5JPI3	Uncharacterized protein C3orf38	C3orf38	CC038_HUMAN|Q5JPI3_K318	G-6599_DMSO_30min	0.543835	0.580622	0.936642	16.8489	0.362175	0.818459
CC127_HUMAN	Q96BQ5	Coiled-coil domain-containing protein 127	CCDC127	CC127_HUMAN|Q96BQ5_K160	G-6599_DMSO_30min	0.394757	0.604477	0.653056	17.7594	0.522086	0.884199
CC138_HUMAN	Q96M89	Coiled-coil domain-containing protein 138	CCDC138	CC138_HUMAN|Q96M89_K244	G-6599_DMSO_30min	-0.891799	0.326839	-2.72856	19.9474	0.012962	0.488622
CC138_HUMAN	Q96M89	Coiled-coil domain-containing protein 138	CCDC138	CC138_HUMAN|Q96M89_K228	G-6599_DMSO_30min	-0.219237	0.500557	-0.437986	17.7347	0.666684	0.928931
CC50A_HUMAN	Q9NV96	Cell cycle control protein 50A	TMEM30A	CC50A_HUMAN|Q9NV96_K202	G-6599_DMSO_30min	-0.0576705	0.24927	-0.231358	19.582	0.819437	0.967371
CC50A_HUMAN	Q9NV96	Cell cycle control protein 50A	TMEM30A	CC50A_HUMAN|Q9NV96_K24	G-6599_DMSO_30min	0.0449625	0.336971	0.133432	17.997	0.895333	0.986798
CC71L_HUMAN	Q8N9Z2	Coiled-coil domain-containing protein 71L	CCDC71L	CC71L_HUMAN|Q8N9Z2_K96	G-6599_DMSO_30min	-0.048926	0.260355	-0.18792	19.8518	0.852847	0.975872
CC71L_HUMAN	Q8N9Z2	Coiled-coil domain-containing protein 71L	CCDC71L	CC71L_HUMAN|Q8N9Z2_K61	G-6599_DMSO_30min	-0.312327	0.247055	-1.2642	20.2886	0.220489	0.734176
CCAR2_HUMAN	Q8N163	Cell cycle and apoptosis regulator protein 2	CCAR2	CCAR2_HUMAN|Q8N163_K791	G-6599_DMSO_30min	-0.403961	0.423578	-0.953687	17.0291	0.353584	0.813758
CCAR2_HUMAN	Q8N163	Cell cycle and apoptosis regulator protein 2	CCAR2	CCAR2_HUMAN|Q8N163_K344	G-6599_DMSO_30min	-0.414706	0.233958	-1.77256	18.9812	0.0923515	0.635772
CCAR2_HUMAN	Q8N163	Cell cycle and apoptosis regulator protein 2	CCAR2	CCAR2_HUMAN|Q8N163_K832	G-6599_DMSO_30min	-0.595632	0.27969	-2.12961	18.1153	0.0471676	0.571409
CCAR2_HUMAN	Q8N163	Cell cycle and apoptosis regulator protein 2	CCAR2	CCAR2_HUMAN|Q8N163_K309	G-6599_DMSO_30min	0.384845	0.488112	0.788435	16.8286	0.441408	0.848656
CCD32_HUMAN	Q9BV29	NA	NA	CCD32_HUMAN|Q9BV29_K89	G-6599_DMSO_30min	-0.189403	0.234743	-0.80685	19.6209	0.429425	0.841683
CCD47_HUMAN	Q96A33	Coiled-coil domain-containing protein 47	CCDC47	CCD47_HUMAN|Q96A33_K196	G-6599_DMSO_30min	0.24358	0.490523	0.496572	17.3813	0.625713	0.916001
CCD47_HUMAN	Q96A33	Coiled-coil domain-containing protein 47	CCDC47	CCD47_HUMAN|Q96A33_K419	G-6599_DMSO_30min	-0.538214	0.30007	-1.79363	19.4669	0.0884228	0.627641
CCD50_HUMAN	Q8IVM0	Coiled-coil domain-containing protein 50	CCDC50	CCD50_HUMAN|Q8IVM0_K157	G-6599_DMSO_30min	-0.477799	0.296726	-1.61024	17.8835	0.124855	0.664931
CCD50_HUMAN	Q8IVM0	Coiled-coil domain-containing protein 50	CCDC50	CCD50_HUMAN|Q8IVM0_K152	G-6599_DMSO_30min	-0.0800286	0.549543	-0.145627	16.6975	0.885959	0.984008
CCD50_HUMAN	Q8IVM0	Coiled-coil domain-containing protein 50	CCDC50	CCD50_HUMAN|Q8IVM0_K214	G-6599_DMSO_30min	-0.107709	0.300609	-0.358303	17.8392	0.724321	0.94683
CCD61_HUMAN	Q9Y6R9	Coiled-coil domain-containing protein 61	CCDC61	CCD61_HUMAN|Q9Y6R9_K352	G-6599_DMSO_30min	-0.990571	0.345012	-2.87112	17.752	0.0102609	0.466658
CCD71_HUMAN	Q8IV32	Coiled-coil domain-containing protein 71	CCDC71	CCD71_HUMAN|Q8IV32_K127	G-6599_DMSO_30min	0.246955	0.293809	0.840529	24.5136	0.408736	0.829297
CCD77_HUMAN	Q9BR77	Coiled-coil domain-containing protein 77	CCDC77	CCD77_HUMAN|Q9BR77_K170	G-6599_DMSO_30min	-0.285723	0.346067	-0.82563	31.9961	0.415128	0.831704
CCD93_HUMAN	Q567U6	Coiled-coil domain-containing protein 93	CCDC93	CCD93_HUMAN|Q567U6_K404	G-6599_DMSO_30min	-0.295603	0.235709	-1.2541	23.491	0.222142	0.735302
CCD93_HUMAN	Q567U6	Coiled-coil domain-containing protein 93	CCDC93	CCD93_HUMAN|Q567U6_K45	G-6599_DMSO_30min	-0.539112	0.238653	-2.25898	23.2953	0.0335414	0.545928
CCDB1_HUMAN	O95273	Cyclin-D1-binding protein 1	CCNDBP1	CCDB1_HUMAN|O95273_K170	G-6599_DMSO_30min	-0.540578	0.270642	-1.99739	19.5025	0.0599268	0.595573
CCDB1_HUMAN	O95273	Cyclin-D1-binding protein 1	CCNDBP1	CCDB1_HUMAN|O95273_K317	G-6599_DMSO_30min	-0.176784	0.276512	-0.639333	19.3548	0.530101	0.886063
CCDC3_HUMAN	Q9BQI4	Coiled-coil domain-containing protein 3	CCDC3	CCDC3_HUMAN|Q9BQI4_K201	G-6599_DMSO_30min	0.117457	0.364174	0.32253	19.5149	0.750481	0.953836
CCDC6_HUMAN	Q16204	Coiled-coil domain-containing protein 6	CCDC6	CCDC6_HUMAN|Q16204_K71	G-6599_DMSO_30min	-0.471583	0.236667	-1.9926	20.1994	0.0599925	0.595573
CCDC6_HUMAN	Q16204	Coiled-coil domain-containing protein 6	CCDC6	CCDC6_HUMAN|Q16204_K119	G-6599_DMSO_30min	-0.412011	0.23727	-1.73647	20.1775	0.0977258	0.636286
CCDC6_HUMAN	Q16204	Coiled-coil domain-containing protein 6	CCDC6	CCDC6_HUMAN|Q16204_K286	G-6599_DMSO_30min	-0.387243	0.445676	-0.868891	17.2746	0.396819	0.824931
CCN1_HUMAN	O00622	NA	NA	CCN1_HUMAN|O00622_K378	G-6599_DMSO_30min	-0.399193	0.296272	-1.34738	26.3063	0.189348	0.706959
CCNA2_HUMAN	P20248	Cyclin-A2	CCNA2	CCNA2_HUMAN|P20248_K54	G-6599_DMSO_30min	-0.184082	0.302525	-0.608483	23.4293	0.548721	0.888969
CCNB1_HUMAN	P14635	G2/mitotic-specific cyclin-B1	CCNB1	CCNB1_HUMAN|P14635_K18	G-6599_DMSO_30min	-0.626539	0.334527	-1.87291	17.6545	0.0777363	0.619196
CCNB2_HUMAN	O95067	G2/mitotic-specific cyclin-B2	CCNB2	CCNB2_HUMAN|O95067_K360	G-6599_DMSO_30min	-0.642625	0.311558	-2.06262	23.4315	0.0504031	0.582956
CCND1_HUMAN	P24385	G1/S-specific cyclin-D1	CCND1	CCND1_HUMAN|P24385_K33	G-6599_DMSO_30min	-0.00580757	0.26225	-0.0221452	19.2298	0.98256	0.997244
CCND1_HUMAN	P24385	G1/S-specific cyclin-D1	CCND1	CCND1_HUMAN|P24385_K95	G-6599_DMSO_30min	-0.133305	0.243204	-0.548121	19.7588	0.589748	0.905584
CCND1_HUMAN	P24385	G1/S-specific cyclin-D1	CCND1	CCND1_HUMAN|P24385_K46	G-6599_DMSO_30min	-0.299271	0.261213	-1.1457	19.2554	0.265961	0.766441
CCND1_HUMAN	P24385	G1/S-specific cyclin-D1	CCND1	CCND1_HUMAN|P24385_K238	G-6599_DMSO_30min	0.0171586	0.296663	0.0578386	18.5365	0.954496	0.994021
CCNH_HUMAN	P51946	Cyclin-H	CCNH	CCNH_HUMAN|P51946_K58	G-6599_DMSO_30min	0.210284	0.277111	0.758843	24.3481	0.45523	0.853715
CCNH_HUMAN	P51946	Cyclin-H	CCNH	CCNH_HUMAN|P51946_K72	G-6599_DMSO_30min	0.365265	0.428855	0.851719	19.3523	0.404787	0.828561
CCNH_HUMAN	P51946	Cyclin-H	CCNH	CCNH_HUMAN|P51946_K305	G-6599_DMSO_30min	-0.290671	0.49637	-0.585594	18.5158	0.565218	0.893993
CCNK_HUMAN	O75909	Cyclin-K	CCNK	CCNK_HUMAN|O75909_K166	G-6599_DMSO_30min	-0.232301	0.327092	-0.7102	17.8183	0.486772	0.867806
CCNT1_HUMAN	O60563	Cyclin-T1	CCNT1	CCNT1_HUMAN|O60563_K380	G-6599_DMSO_30min	-0.568323	0.367081	-1.54822	18.0029	0.138968	0.671959
CCZ1B_HUMAN	P86790	Vacuolar fusion protein CCZ1 homolog B	CCZ1B	CCZ1B_HUMAN|P86790_K295	G-6599_DMSO_30min	-0.297529	0.322233	-0.923334	17.9761	0.368062	0.82061
CCZ1B_HUMAN	P86790	Vacuolar fusion protein CCZ1 homolog B	CCZ1B	CCZ1B_HUMAN|P86790_K113	G-6599_DMSO_30min	-0.324114	0.240558	-1.34734	19.4765	0.193337	0.712002
CCZ1B_HUMAN	P86790	Vacuolar fusion protein CCZ1 homolog B	CCZ1B	CCZ1B_HUMAN|P86790_K468	G-6599_DMSO_30min	0.215185	0.360739	0.596512	17.6101	0.558424	0.891306
CCZ1B_HUMAN	P86790	Vacuolar fusion protein CCZ1 homolog B	CCZ1B	CCZ1B_HUMAN|P86790_K442	G-6599_DMSO_30min	-0.389546	0.214355	-1.81729	20.3985	0.083894	0.625206
CCZ1B_HUMAN	P86790	Vacuolar fusion protein CCZ1 homolog B	CCZ1B	CCZ1B_HUMAN|P86790_K456	G-6599_DMSO_30min	-0.176858	0.381011	-0.46418	17.4624	0.648253	0.924266
CD123_HUMAN	O75794	Cell division cycle protein 123 homolog	CDC123	CD123_HUMAN|O75794_K204	G-6599_DMSO_30min	-0.625109	0.294691	-2.12124	31.4015	0.0418955	0.555298
CD123_HUMAN	O75794	Cell division cycle protein 123 homolog	CDC123	CD123_HUMAN|O75794_K218	G-6599_DMSO_30min	-0.376011	0.285443	-1.31729	31.8399	0.197144	0.714483
CD123_HUMAN	O75794	Cell division cycle protein 123 homolog	CDC123	CD123_HUMAN|O75794_K24	G-6599_DMSO_30min	-0.644389	0.34045	-1.89276	28.3797	0.0686304	0.596256
CD166_HUMAN	Q13740	CD166 antigen	ALCAM	CD166_HUMAN|Q13740_K572	G-6599_DMSO_30min	-0.132428	0.398111	-0.33264	21.107	0.742687	0.953312
CD166_HUMAN	Q13740	CD166 antigen	ALCAM	CD166_HUMAN|Q13740_K580	G-6599_DMSO_30min	-0.419037	0.415577	-1.00833	20.6691	0.324957	0.800192
CD276_HUMAN	Q5ZPR3	CD276 antigen	CD276	CD276_HUMAN|Q5ZPR3_K526	G-6599_DMSO_30min	0.95541	0.748345	1.2767	16.9882	0.218886	0.733978
CD320_HUMAN	Q9NPF0	CD320 antigen	CD320	CD320_HUMAN|Q9NPF0_K269	G-6599_DMSO_30min	-0.169075	0.400138	-0.422542	17.3887	0.677808	0.93369
CD320_HUMAN	Q9NPF0	CD320 antigen	CD320	CD320_HUMAN|Q9NPF0_K278	G-6599_DMSO_30min	-0.17133	0.557135	-0.307519	16.8188	0.762223	0.956748
CD44_HUMAN	P16070	CD44 antigen	CD44	CD44_HUMAN|P16070_K739	G-6599_DMSO_30min	-0.35684	0.369726	-0.965145	18.2316	0.347101	0.810768
CD44_HUMAN	P16070	CD44 antigen	CD44	CD44_HUMAN|P16070_K38	G-6599_DMSO_30min	-0.198177	0.255445	-0.775808	20.6536	0.446655	0.852342
CD44_HUMAN	P16070	CD44 antigen	CD44	CD44_HUMAN|P16070_K681	G-6599_DMSO_30min	0.216763	0.572164	0.378848	17.0404	0.70948	0.942991
CD44_HUMAN	P16070	CD44 antigen	CD44	CD44_HUMAN|P16070_K715	G-6599_DMSO_30min	-0.202005	0.386842	-0.522191	18.0501	0.607887	0.909948
CD44_HUMAN	P16070	CD44 antigen	CD44	CD44_HUMAN|P16070_K695	G-6599_DMSO_30min	-0.383353	0.315511	-1.21502	19.0318	0.239217	0.748838
CD47_HUMAN	Q08722	Leukocyte surface antigen CD47	CD47	CD47_HUMAN|Q08722_K314	G-6599_DMSO_30min	-0.404427	0.361655	-1.11827	18.1734	0.278018	0.776524
CD99_HUMAN	P14209	CD99 antigen	CD99	CD99_HUMAN|P14209_K156	G-6599_DMSO_30min	0.192419	0.502923	0.382602	17.3823	0.706653	0.942443
CDC16_HUMAN	Q13042	Cell division cycle protein 16 homolog	CDC16	CDC16_HUMAN|Q13042_K325	G-6599_DMSO_30min	-0.26711	0.271065	-0.985412	18.5356	0.337111	0.806045
CDC16_HUMAN	Q13042	Cell division cycle protein 16 homolog	CDC16	CDC16_HUMAN|Q13042_K431	G-6599_DMSO_30min	0.168439	0.52906	0.318374	16.809	0.754123	0.954434
CDC16_HUMAN	Q13042	Cell division cycle protein 16 homolog	CDC16	CDC16_HUMAN|Q13042_K460	G-6599_DMSO_30min	0.045741	0.257661	0.177524	18.7978	0.860996	0.976636
CDC16_HUMAN	Q13042	Cell division cycle protein 16 homolog	CDC16	CDC16_HUMAN|Q13042_K154	G-6599_DMSO_30min	-0.278528	0.233337	-1.19367	19.4048	0.246996	0.755788
CDC20_HUMAN	Q12834	Cell division cycle protein 20 homolog	CDC20	CDC20_HUMAN|Q12834_K490	G-6599_DMSO_30min	-0.864342	0.258477	-3.34399	21.3352	0.00302848	0.327504
CDC20_HUMAN	Q12834	Cell division cycle protein 20 homolog	CDC20	CDC20_HUMAN|Q12834_K73	G-6599_DMSO_30min	-0.370529	0.305808	-1.21164	19.7672	0.239936	0.750168
CDC20_HUMAN	Q12834	Cell division cycle protein 20 homolog	CDC20	CDC20_HUMAN|Q12834_K259	G-6599_DMSO_30min	-0.108202	0.434468	-0.249044	17.9076	0.806161	0.965351
CDC20_HUMAN	Q12834	Cell division cycle protein 20 homolog	CDC20	CDC20_HUMAN|Q12834_K485_K490	G-6599_DMSO_30min	-1.05879	0.281479	-3.76151	20.4654	0.00118908	0.190716
CDC23_HUMAN	Q9UJX2	Cell division cycle protein 23 homolog	CDC23	CDC23_HUMAN|Q9UJX2_K453	G-6599_DMSO_30min	-0.331645	0.247205	-1.34158	21.9828	0.193428	0.712052
CDC23_HUMAN	Q9UJX2	Cell division cycle protein 23 homolog	CDC23	CDC23_HUMAN|Q9UJX2_K522	G-6599_DMSO_30min	-0.454998	0.344897	-1.31923	19.0183	0.202756	0.719427
CDC27_HUMAN	P30260	Cell division cycle protein 27 homolog	CDC27	CDC27_HUMAN|P30260_K77	G-6599_DMSO_30min	-0.402696	0.297012	-1.35583	19.1545	0.190925	0.707941
CDC27_HUMAN	P30260	Cell division cycle protein 27 homolog	CDC27	CDC27_HUMAN|P30260_K133	G-6599_DMSO_30min	-0.437142	0.221693	-1.97183	21.7557	0.0614764	0.595573
CDC27_HUMAN	P30260	Cell division cycle protein 27 homolog	CDC27	CDC27_HUMAN|P30260_K720	G-6599_DMSO_30min	0.334141	0.796764	0.419372	16.6114	0.680317	0.933709
CDC27_HUMAN	P30260	Cell division cycle protein 27 homolog	CDC27	CDC27_HUMAN|P30260_K694	G-6599_DMSO_30min	0.194054	0.429591	0.451718	17.5748	0.656997	0.926309
CDC27_HUMAN	P30260	Cell division cycle protein 27 homolog	CDC27	CDC27_HUMAN|P30260_K718	G-6599_DMSO_30min	-0.274259	0.225356	-1.21701	21.5598	0.236756	0.7476
CDC27_HUMAN	P30260	Cell division cycle protein 27 homolog	CDC27	CDC27_HUMAN|P30260_K701	G-6599_DMSO_30min	-0.00504127	0.239589	-0.0210413	20.8889	0.983412	0.997244
CDC27_HUMAN	P30260	Cell division cycle protein 27 homolog	CDC27	CDC27_HUMAN|P30260_K99	G-6599_DMSO_30min	-0.311922	0.314864	-0.990657	18.8117	0.334425	0.805507
CDC27_HUMAN	P30260	Cell division cycle protein 27 homolog	CDC27	CDC27_HUMAN|P30260_K683	G-6599_DMSO_30min	-0.338599	0.257724	-1.31381	20.2027	0.203636	0.721041
CDC27_HUMAN	P30260	Cell division cycle protein 27 homolog	CDC27	CDC27_HUMAN|P30260_K62	G-6599_DMSO_30min	-0.294476	0.245331	-1.20032	20.6535	0.243601	0.752752
CDC27_HUMAN	P30260	Cell division cycle protein 27 homolog	CDC27	CDC27_HUMAN|P30260_K588	G-6599_DMSO_30min	0.711759	0.935996	0.760429	16.5059	0.457724	0.855063
CDC42_HUMAN	P60953	Cell division control protein 42 homolog	CDC42	CDC42_HUMAN|P60953_K153	G-6599_DMSO_30min	-0.303647	0.257119	-1.18096	20.6712	0.251029	0.757526
CDC42_HUMAN	P60953	Cell division control protein 42 homolog	CDC42	CDC42_HUMAN|P60953_K107	G-6599_DMSO_30min	-0.398506	0.391524	-1.01783	18.0361	0.322218	0.799008
CDC42_HUMAN	P60953	Cell division control protein 42 homolog	CDC42	CDC42_HUMAN|P60953_K163	G-6599_DMSO_30min	-0.368266	0.27086	-1.35962	20.1944	0.18894	0.706959
CDC42_HUMAN	P60953	Cell division control protein 42 homolog	CDC42	CDC42_HUMAN|P60953_K135	G-6599_DMSO_30min	0.0413358	0.516082	0.0800955	17.2485	0.937083	0.991158
CDC5L_HUMAN	Q99459	Cell division cycle 5-like protein	CDC5L	CDC5L_HUMAN|Q99459_K59	G-6599_DMSO_30min	-0.309567	0.308055	-1.00491	25.8486	0.324256	0.800192
CDC73_HUMAN	Q6P1J9	Parafibromin	CDC73	CDC73_HUMAN|Q6P1J9_K209	G-6599_DMSO_30min	-0.380106	0.331748	-1.14577	17.4846	0.267332	0.767262
CDC73_HUMAN	Q6P1J9	Parafibromin	CDC73	CDC73_HUMAN|Q6P1J9_K243	G-6599_DMSO_30min	-0.799839	0.287972	-2.77749	17.9136	0.0124602	0.485316
CDC73_HUMAN	Q6P1J9	Parafibromin	CDC73	CDC73_HUMAN|Q6P1J9_K247	G-6599_DMSO_30min	-0.372195	0.327007	-1.13819	17.5225	0.270367	0.770607
CDC73_HUMAN	Q6P1J9	Parafibromin	CDC73	CDC73_HUMAN|Q6P1J9_K161	G-6599_DMSO_30min	-0.235651	0.399007	-0.590592	17.0882	0.562524	0.893163
CDC73_HUMAN	Q6P1J9	Parafibromin	CDC73	CDC73_HUMAN|Q6P1J9_K198	G-6599_DMSO_30min	-0.2945	0.45435	-0.648178	16.8885	0.525585	0.885585
CDK1_HUMAN	P06493	Cyclin-dependent kinase 1	CDK1	CDK1_HUMAN|P06493_K245	G-6599_DMSO_30min	-0.641821	0.264764	-2.42412	18.7122	0.0256593	0.545928
CDK1_HUMAN	P06493	Cyclin-dependent kinase 1	CDK1	CDK1_HUMAN|P06493_K201	G-6599_DMSO_30min	0.0878499	0.603764	0.145504	16.6834	0.886057	0.984008
CDK1_HUMAN	P06493	Cyclin-dependent kinase 1	CDK1	CDK1_HUMAN|P06493_K243	G-6599_DMSO_30min	-0.578858	0.263093	-2.2002	18.7459	0.0405417	0.553837
CDK1_HUMAN	P06493	Cyclin-dependent kinase 1	CDK1	CDK1_HUMAN|P06493_K279	G-6599_DMSO_30min	-0.611035	0.312049	-1.95814	17.9853	0.0659107	0.595573
CDK1_HUMAN	P06493	Cyclin-dependent kinase 1	CDK1	CDK1_HUMAN|P06493_K238	G-6599_DMSO_30min	-0.46479	0.306567	-1.51611	18.0517	0.146807	0.677931
CDK1_HUMAN	P06493	Cyclin-dependent kinase 1	CDK1	CDK1_HUMAN|P06493_K33	G-6599_DMSO_30min	-0.416917	0.278032	-1.49953	18.4678	0.150638	0.680089
CDK1_HUMAN	P06493	Cyclin-dependent kinase 1	CDK1	CDK1_HUMAN|P06493_K24	G-6599_DMSO_30min	-0.344079	0.339255	-1.01422	17.7044	0.32414	0.800192
CDK1_HUMAN	P06493	Cyclin-dependent kinase 1	CDK1	CDK1_HUMAN|P06493_K9	G-6599_DMSO_30min	-0.158851	0.550597	-0.288508	16.7764	0.776493	0.95959
CDK2_HUMAN	P24941	Cyclin-dependent kinase 2	CDK2	CDK2_HUMAN|P24941_K291	G-6599_DMSO_30min	-0.513427	0.271794	-1.88903	18.154	0.0749702	0.613647
CDK2_HUMAN	P24941	Cyclin-dependent kinase 2	CDK2	CDK2_HUMAN|P24941_K24	G-6599_DMSO_30min	-0.383785	0.295475	-1.29888	17.8453	0.21052	0.726559
CDK4_HUMAN	P11802	Cyclin-dependent kinase 4	CDK4	CDK4_HUMAN|P11802_K22	G-6599_DMSO_30min	-0.31461	0.320096	-0.982863	18.1735	0.33858	0.806466
CDK9_HUMAN	P50750	Cyclin-dependent kinase 9	CDK9	CDK9_HUMAN|P50750_K68	G-6599_DMSO_30min	-0.223288	0.237702	-0.939361	17.8366	0.360093	0.817279
CDK9_HUMAN	P50750	Cyclin-dependent kinase 9	CDK9	CDK9_HUMAN|P50750_K74	G-6599_DMSO_30min	-0.166487	0.311214	-0.53496	17.1506	0.599546	0.906602
CDN1A_HUMAN	P38936	Cyclin-dependent kinase inhibitor 1	CDKN1A	CDN1A_HUMAN|P38936_K154	G-6599_DMSO_30min	-1.19861	0.351755	-3.40752	18.2835	0.00308363	0.32805
CDN1B_HUMAN	P46527	Cyclin-dependent kinase inhibitor 1B	CDKN1B	CDN1B_HUMAN|P46527_K47	G-6599_DMSO_30min	-0.0434875	0.296515	-0.146662	19.873	0.884876	0.983654
CDYL_HUMAN	Q9Y232	NA	NA	CDYL_HUMAN|Q9Y232_K508	G-6599_DMSO_30min	-0.114019	0.268348	-0.424894	25.0395	0.674543	0.932282
CDYL2_HUMAN	Q8N8U2	Chromodomain Y-like protein 2	CDYL2	CDYL2_HUMAN|Q8N8U2_K416	G-6599_DMSO_30min	0.2149	0.281463	0.76351	29.3399	0.451255	0.853715
CE034_HUMAN	Q96MH7	Uncharacterized protein C5orf34	C5orf34	CE034_HUMAN|Q96MH7_K167	G-6599_DMSO_30min	-0.0164039	0.338307	-0.0484884	20.7675	0.96179	0.994677
CE164_HUMAN	Q9UPV0	Centrosomal protein of 164 kDa	CEP164	CE164_HUMAN|Q9UPV0_K102	G-6599_DMSO_30min	-0.809495	0.275001	-2.94361	20.8086	0.0078077	0.462987
CE290_HUMAN	O15078	Centrosomal protein of 290 kDa	CEP290	CE290_HUMAN|O15078_K2028	G-6599_DMSO_30min	-0.33195	0.237786	-1.396	20.6036	0.177575	0.702264
CEBPZ_HUMAN	Q03701	CCAAT/enhancer-binding protein zeta	CEBPZ	CEBPZ_HUMAN|Q03701_K211	G-6599_DMSO_30min	-0.433327	0.249518	-1.73666	19.1721	0.098489	0.636286
CEBPZ_HUMAN	Q03701	CCAAT/enhancer-binding protein zeta	CEBPZ	CEBPZ_HUMAN|Q03701_K206	G-6599_DMSO_30min	-0.32919	0.279494	-1.17781	18.5404	0.253771	0.759168
CELF1_HUMAN	Q92879	CUGBP Elav-like family member 1	CELF1	CELF1_HUMAN|Q92879_K70	G-6599_DMSO_30min	-0.106885	0.251508	-0.424978	18.3492	0.675795	0.932579
CELF1_HUMAN	Q92879	CUGBP Elav-like family member 1	CELF1	CELF1_HUMAN|Q92879_K117	G-6599_DMSO_30min	-0.277327	0.236596	-1.17215	18.6418	0.255898	0.759612
CELF1_HUMAN	Q92879	CUGBP Elav-like family member 1	CELF1	CELF1_HUMAN|Q92879_K95	G-6599_DMSO_30min	-0.324139	0.252488	-1.28378	18.3319	0.215209	0.730927
CENPC_HUMAN	Q03188	Centromere protein C	CENPC	CENPC_HUMAN|Q03188_K871	G-6599_DMSO_30min	-0.114104	0.458175	-0.249041	16.9446	0.806322	0.965351
CENPC_HUMAN	Q03188	Centromere protein C	CENPC	CENPC_HUMAN|Q03188_K180	G-6599_DMSO_30min	-0.448876	0.398821	-1.12551	17.179	0.275853	0.775575
CENPE_HUMAN	Q02224	Centromere-associated protein E	CENPE	CENPE_HUMAN|Q02224_K707	G-6599_DMSO_30min	-0.423136	0.232266	-1.82177	19.2148	0.0840948	0.625206
CENPE_HUMAN	Q02224	Centromere-associated protein E	CENPE	CENPE_HUMAN|Q02224_K638	G-6599_DMSO_30min	-0.655749	0.362863	-1.80715	17.3994	0.0880615	0.627641
CENPF_HUMAN	P49454	Centromere protein F	CENPF	CENPF_HUMAN|P49454_K860	G-6599_DMSO_30min	-0.112895	0.376662	-0.299726	19.0249	0.767637	0.958718
CENPF_HUMAN	P49454	Centromere protein F	CENPF	CENPF_HUMAN|P49454_K1443	G-6599_DMSO_30min	0.0402807	0.53817	0.0748476	17.5501	0.941183	0.991365
CENPF_HUMAN	P49454	Centromere protein F	CENPF	CENPF_HUMAN|P49454_K605	G-6599_DMSO_30min	-0.133147	0.341645	-0.389724	19.6769	0.700927	0.940086
CENPF_HUMAN	P49454	Centromere protein F	CENPF	CENPF_HUMAN|P49454_K770	G-6599_DMSO_30min	-0.0930952	0.514342	-0.180999	17.6802	0.858427	0.976159
CENPF_HUMAN	P49454	Centromere protein F	CENPF	CENPF_HUMAN|P49454_K2708	G-6599_DMSO_30min	0.689078	0.818186	0.842202	16.7899	0.411511	0.830249
CENPF_HUMAN	P49454	Centromere protein F	CENPF	CENPF_HUMAN|P49454_K2363	G-6599_DMSO_30min	-0.169811	0.33345	-0.509256	19.8628	0.616184	0.910897
CENPF_HUMAN	P49454	Centromere protein F	CENPF	CENPF_HUMAN|P49454_K324	G-6599_DMSO_30min	-0.248163	0.380588	-0.652052	18.9637	0.522193	0.884199
CENPF_HUMAN	P49454	Centromere protein F	CENPF	CENPF_HUMAN|P49454_K1019	G-6599_DMSO_30min	-0.127186	0.315705	-0.402861	20.3211	0.691257	0.938143
CENPF_HUMAN	P49454	Centromere protein F	CENPF	CENPF_HUMAN|P49454_K2873	G-6599_DMSO_30min	-0.22135	0.301059	-0.735237	20.7683	0.470417	0.861026
CENPF_HUMAN	P49454	Centromere protein F	CENPF	CENPF_HUMAN|P49454_K2091	G-6599_DMSO_30min	-0.271976	0.3009	-0.903876	20.7735	0.376424	0.823239
CENPF_HUMAN	P49454	Centromere protein F	CENPF	CENPF_HUMAN|P49454_K2771	G-6599_DMSO_30min	-0.303282	0.261761	-1.15862	22.4036	0.258812	0.760065
CENPF_HUMAN	P49454	Centromere protein F	CENPF	CENPF_HUMAN|P49454_K492	G-6599_DMSO_30min	-0.375532	0.268127	-1.40058	22.0848	0.175235	0.700105
CENPF_HUMAN	P49454	Centromere protein F	CENPF	CENPF_HUMAN|P49454_K919	G-6599_DMSO_30min	0.11941	0.30568	0.390639	20.6196	0.700071	0.939839
CENPF_HUMAN	P49454	Centromere protein F	CENPF	CENPF_HUMAN|P49454_K1129	G-6599_DMSO_30min	-0.248623	0.283059	-0.878344	21.4258	0.389501	0.824931
CENPF_HUMAN	P49454	Centromere protein F	CENPF	CENPF_HUMAN|P49454_K513	G-6599_DMSO_30min	0.116136	0.366057	0.317263	19.2011	0.754468	0.954484
CENPF_HUMAN	P49454	Centromere protein F	CENPF	CENPF_HUMAN|P49454_K363	G-6599_DMSO_30min	-0.121409	0.262854	-0.461889	22.3471	0.648626	0.92451
CENPF_HUMAN	P49454	Centromere protein F	CENPF	CENPF_HUMAN|P49454_K557	G-6599_DMSO_30min	-0.137294	0.306943	-0.447295	20.5802	0.659334	0.927265
CENPF_HUMAN	P49454	Centromere protein F	CENPF	CENPF_HUMAN|P49454_K356	G-6599_DMSO_30min	-0.0958687	0.292246	-0.328041	21.0736	0.746118	0.953513
CENPF_HUMAN	P49454	Centromere protein F	CENPF	CENPF_HUMAN|P49454_K689	G-6599_DMSO_30min	1.69074	1.04719	1.61454	15.5493	0.126515	0.665478
CENPF_HUMAN	P49454	Centromere protein F	CENPF	CENPF_HUMAN|P49454_K1577	G-6599_DMSO_30min	-0.2313	0.294045	-0.786617	21.0089	0.44029	0.848457
CENPF_HUMAN	P49454	Centromere protein F	CENPF	CENPF_HUMAN|P49454_K657	G-6599_DMSO_30min	-0.713628	0.279362	-2.5545	21.5783	0.0182325	0.520477
CENPF_HUMAN	P49454	Centromere protein F	CENPF	CENPF_HUMAN|P49454_K510	G-6599_DMSO_30min	-0.113215	0.257248	-0.440102	22.6452	0.664036	0.928229
CENPH_HUMAN	Q9H3R5	Centromere protein H	CENPH	CENPH_HUMAN|Q9H3R5_K224	G-6599_DMSO_30min	-1.1359	0.506101	-2.24442	17.0567	0.0383581	0.553837
CENPH_HUMAN	Q9H3R5	Centromere protein H	CENPH	CENPH_HUMAN|Q9H3R5_K131	G-6599_DMSO_30min	-0.749007	0.307537	-2.4355	18.5564	0.0251513	0.545928
CENPH_HUMAN	Q9H3R5	Centromere protein H	CENPH	CENPH_HUMAN|Q9H3R5_K138	G-6599_DMSO_30min	-0.0711235	0.315444	-0.225471	18.4348	0.824094	0.968357
CENPH_HUMAN	Q9H3R5	Centromere protein H	CENPH	CENPH_HUMAN|Q9H3R5_K51	G-6599_DMSO_30min	-0.526383	0.226214	-2.32693	20.7373	0.0301896	0.545928
CENPH_HUMAN	Q9H3R5	Centromere protein H	CENPH	CENPH_HUMAN|Q9H3R5_K99	G-6599_DMSO_30min	-0.405825	0.230378	-1.76156	20.5611	0.0930075	0.635772
CENPI_HUMAN	Q92674	Centromere protein I	CENPI	CENPI_HUMAN|Q92674_K79	G-6599_DMSO_30min	-0.418816	0.270351	-1.54915	18.1965	0.138561	0.671052
CENPI_HUMAN	Q92674	Centromere protein I	CENPI	CENPI_HUMAN|Q92674_K670	G-6599_DMSO_30min	0.292736	0.570154	0.513434	16.655	0.614391	0.909948
CENPI_HUMAN	Q92674	Centromere protein I	CENPI	CENPI_HUMAN|Q92674_K619	G-6599_DMSO_30min	-0.119675	0.200437	-0.597072	19.9548	0.557174	0.891119
CENPI_HUMAN	Q92674	Centromere protein I	CENPI	CENPI_HUMAN|Q92674_K627	G-6599_DMSO_30min	-0.456898	0.243707	-1.87478	18.6786	0.076548	0.616877
CENPN_HUMAN	Q96H22	Centromere protein N	CENPN	CENPN_HUMAN|Q96H22_K102	G-6599_DMSO_30min	0.298078	0.338466	0.880675	23.3786	0.387458	0.824931
CENPN_HUMAN	Q96H22-2	Centromere protein N (isoform 2)	CENPN	CENPN_HUMAN|Q96H22-2_K184	G-6599_DMSO_30min	0.847395	0.752151	1.12663	17.5196	0.275095	0.775224
CENPQ_HUMAN	Q7L2Z9	Centromere protein Q	CENPQ	CENPQ_HUMAN|Q7L2Z9_K56	G-6599_DMSO_30min	-0.549828	0.206259	-2.66572	21.4555	0.0143052	0.501882
CENPQ_HUMAN	Q7L2Z9	Centromere protein Q	CENPQ	CENPQ_HUMAN|Q7L2Z9_K71	G-6599_DMSO_30min	-0.0646855	0.238094	-0.271681	20.0478	0.788645	0.962613
CENPU_HUMAN	Q71F23	Centromere protein U	CENPU	CENPU_HUMAN|Q71F23_K340	G-6599_DMSO_30min	-0.107655	0.249209	-0.431985	17.9196	0.670906	0.931008
CENPU_HUMAN	Q71F23	Centromere protein U	CENPU	CENPU_HUMAN|Q71F23_K260	G-6599_DMSO_30min	0.214195	0.410682	0.521559	16.8348	0.608771	0.909948
CENPU_HUMAN	Q71F23	Centromere protein U	CENPU	CENPU_HUMAN|Q71F23_K249	G-6599_DMSO_30min	0.690498	0.485369	1.42262	16.6612	0.173299	0.699019
CEP20_HUMAN	Q96NB1	NA	NA	CEP20_HUMAN|Q96NB1_K119	G-6599_DMSO_30min	-0.386849	0.252447	-1.53239	19.2112	0.141728	0.67505
CEP20_HUMAN	Q96NB1	NA	NA	CEP20_HUMAN|Q96NB1_K25	G-6599_DMSO_30min	-0.128754	0.237376	-0.542406	19.6335	0.593643	0.905892
CEP55_HUMAN	Q53EZ4	Centrosomal protein of 55 kDa	CEP55	CEP55_HUMAN|Q53EZ4_K201	G-6599_DMSO_30min	-0.155534	0.299061	-0.520075	18.211	0.609276	0.909948
CEP57_HUMAN	Q86XR8	Centrosomal protein of 57 kDa	CEP57	CEP57_HUMAN|Q86XR8_K95	G-6599_DMSO_30min	-0.38478	0.306768	-1.25431	20.0314	0.224171	0.736476
CEP68_HUMAN	Q76N32	Centrosomal protein of 68 kDa	CEP68	CEP68_HUMAN|Q76N32_K662	G-6599_DMSO_30min	-0.671329	0.282173	-2.37914	18.6143	0.0282274	0.545928
CEP78_HUMAN	Q5JTW2	Centrosomal protein of 78 kDa	CEP78	CEP78_HUMAN|Q5JTW2_K317	G-6599_DMSO_30min	-0.206861	0.216464	-0.95564	22.0934	0.349595	0.811844
CEP78_HUMAN	Q5JTW2	Centrosomal protein of 78 kDa	CEP78	CEP78_HUMAN|Q5JTW2_K142	G-6599_DMSO_30min	-0.536272	0.240864	-2.22645	20.8657	0.0371363	0.553837
CEP78_HUMAN	Q5JTW2	Centrosomal protein of 78 kDa	CEP78	CEP78_HUMAN|Q5JTW2_K329	G-6599_DMSO_30min	-0.33345	0.256898	-1.29799	20.257	0.208877	0.726559
CEP78_HUMAN	Q5JTW2	Centrosomal protein of 78 kDa	CEP78	CEP78_HUMAN|Q5JTW2_K102	G-6599_DMSO_30min	0.0768491	0.280607	0.273868	19.5559	0.787058	0.962414
CEP83_HUMAN	Q9Y592	Centrosomal protein of 83 kDa	CEP83	CEP83_HUMAN|Q9Y592_K53	G-6599_DMSO_30min	-0.285988	0.247053	-1.1576	19.2742	0.261174	0.762469
CEP97_HUMAN	Q8IW35	Centrosomal protein of 97 kDa	CEP97	CEP97_HUMAN|Q8IW35_K552	G-6599_DMSO_30min	-0.266977	0.246691	-1.08223	18.8224	0.29282	0.787642
CERS2_HUMAN	Q96G23	Ceramide synthase 2	CERS2	CERS2_HUMAN|Q96G23_K93	G-6599_DMSO_30min	-0.196308	0.25847	-0.7595	25.3225	0.454567	0.853715
CERS5_HUMAN	Q8N5B7	Ceramide synthase 5	CERS5	CERS5_HUMAN|Q8N5B7_K134	G-6599_DMSO_30min	-0.206772	0.289023	-0.715416	28.2967	0.480214	0.865515
CETN2_HUMAN	P41208	Centrin-2	CETN2	CETN2_HUMAN|P41208_K51	G-6599_DMSO_30min	-0.131367	0.383838	-0.342246	18.6724	0.735988	0.950302
CETN3_HUMAN	O15182	Centrin-3	CETN3	CETN3_HUMAN|O15182_K68	G-6599_DMSO_30min	-0.243398	0.281714	-0.863991	27.5283	0.395059	0.824931
CETN3_HUMAN	O15182	Centrin-3	CETN3	CETN3_HUMAN|O15182_K105	G-6599_DMSO_30min	0.0444442	0.302986	0.146687	25.9571	0.884512	0.983654
CETN3_HUMAN	O15182	Centrin-3	CETN3	CETN3_HUMAN|O15182_K117	G-6599_DMSO_30min	0.129766	0.879999	0.147461	17.2251	0.88448	0.983654
CF089_HUMAN	Q6UWU4	Bombesin receptor-activated protein C6orf89	C6orf89	CF089_HUMAN|Q6UWU4_K113	G-6599_DMSO_30min	-0.307326	0.26734	-1.14957	23.6608	0.261809	0.763228
CF089_HUMAN	Q6UWU4	Bombesin receptor-activated protein C6orf89	C6orf89	CF089_HUMAN|Q6UWU4_K165	G-6599_DMSO_30min	0.178443	0.692776	0.257576	17.2042	0.79979	0.964581
CF298_HUMAN	P57076	NA	NA	CF298_HUMAN|P57076_K120	G-6599_DMSO_30min	-0.25387	0.291898	-0.86972	17.9359	0.395944	0.824931
CFA20_HUMAN	Q9Y6A4	Cilia- and flagella-associated protein 20	CFAP20	CFA20_HUMAN|Q9Y6A4_K190	G-6599_DMSO_30min	-0.363245	0.263395	-1.37909	18.5078	0.184307	0.706847
CFA20_HUMAN	Q9Y6A4	Cilia- and flagella-associated protein 20	CFAP20	CFA20_HUMAN|Q9Y6A4_K182	G-6599_DMSO_30min	-0.228986	0.307776	-0.744002	17.872	0.466546	0.858967
CFA36_HUMAN	Q96G28	Cilia- and flagella-associated protein 36	CFAP36	CFA36_HUMAN|Q96G28_K47	G-6599_DMSO_30min	-0.697266	0.541709	-1.28716	17.2532	0.215039	0.730927
CFA36_HUMAN	Q96G28	Cilia- and flagella-associated protein 36	CFAP36	CFA36_HUMAN|Q96G28_K277	G-6599_DMSO_30min	0.652612	1.15046	0.567259	16.4527	0.578197	0.899287
CFA36_HUMAN	Q96G28	Cilia- and flagella-associated protein 36	CFAP36	CFA36_HUMAN|Q96G28_K293	G-6599_DMSO_30min	-0.48816	0.254455	-1.91845	21.3084	0.0685505	0.596256
CFA36_HUMAN	Q96G28	Cilia- and flagella-associated protein 36	CFAP36	CFA36_HUMAN|Q96G28_K155	G-6599_DMSO_30min	-0.32986	0.547399	-0.602596	17.2315	0.554626	0.890628
CFA36_HUMAN	Q96G28	Cilia- and flagella-associated protein 36	CFAP36	CFA36_HUMAN|Q96G28_K63	G-6599_DMSO_30min	-0.182351	0.833112	-0.218879	16.6561	0.829404	0.9692
CFLAR_HUMAN	O15519	CASP8 and FADD-like apoptosis regulator	CFLAR	CFLAR_HUMAN|O15519_K49	G-6599_DMSO_30min	-0.0468252	0.296149	-0.158114	19.407	0.876001	0.981497
CGAS_HUMAN	Q8N884	Cyclic GMP-AMP synthase	MB21D1	CGAS_HUMAN|Q8N884_K400	G-6599_DMSO_30min	0.02538	0.442438	0.0573639	17.4507	0.954907	0.994021
CGAS_HUMAN	Q8N884	Cyclic GMP-AMP synthase	MB21D1	CGAS_HUMAN|Q8N884_K506	G-6599_DMSO_30min	-0.179317	0.330561	-0.542463	18.4743	0.593984	0.905892
CGAS_HUMAN	Q8N884	Cyclic GMP-AMP synthase	MB21D1	CGAS_HUMAN|Q8N884_K252	G-6599_DMSO_30min	-0.338321	0.253516	-1.33452	20.1952	0.196887	0.714483
CGAS_HUMAN	Q8N884	Cyclic GMP-AMP synthase	MB21D1	CGAS_HUMAN|Q8N884_K187	G-6599_DMSO_30min	-0.307232	0.570192	-0.538822	16.9554	0.597014	0.905892
CGAS_HUMAN	Q8N884	Cyclic GMP-AMP synthase	MB21D1	CGAS_HUMAN|Q8N884_K292	G-6599_DMSO_30min	0.0791511	0.3465	0.22843	18.262	0.82185	0.967774
CGAS_HUMAN	Q8N884	Cyclic GMP-AMP synthase	MB21D1	CGAS_HUMAN|Q8N884_K414	G-6599_DMSO_30min	-0.131682	0.271785	-0.484507	19.6401	0.633385	0.918939
CH10_HUMAN	P61604	10 kDa heat shock protein, mitochondrial	HSPE1	CH10_HUMAN|P61604_K28	G-6599_DMSO_30min	-0.178494	0.306157	-0.583015	25.8983	0.564926	0.893769
CH10_HUMAN	P61604	10 kDa heat shock protein, mitochondrial	HSPE1	CH10_HUMAN|P61604_K56	G-6599_DMSO_30min	-0.331748	0.322828	-1.02763	24.8595	0.314019	0.795929
CH10_HUMAN	P61604	10 kDa heat shock protein, mitochondrial	HSPE1	CH10_HUMAN|P61604_K40	G-6599_DMSO_30min	-0.155161	0.343258	-0.452025	23.7777	0.655347	0.926309
CH10_HUMAN	P61604	10 kDa heat shock protein, mitochondrial	HSPE1	CH10_HUMAN|P61604_K36	G-6599_DMSO_30min	-0.455118	0.296807	-1.53338	26.5479	0.137014	0.668844
CH60_HUMAN	P10809	60 kDa heat shock protein, mitochondrial	HSPD1	CH60_HUMAN|P10809_K396	G-6599_DMSO_30min	-0.172563	0.275674	-0.625965	28.0451	0.536399	0.886063
CH60_HUMAN	P10809	60 kDa heat shock protein, mitochondrial	HSPD1	CH60_HUMAN|P10809_K473	G-6599_DMSO_30min	-0.195648	0.288284	-0.678665	27.0419	0.503117	0.873731
CH60_HUMAN	P10809	60 kDa heat shock protein, mitochondrial	HSPD1	CH60_HUMAN|P10809_K75	G-6599_DMSO_30min	-0.209457	0.454712	-0.460637	20.2418	0.649969	0.924763
CH60_HUMAN	P10809	60 kDa heat shock protein, mitochondrial	HSPD1	CH60_HUMAN|P10809_K233	G-6599_DMSO_30min	-0.218782	0.288877	-0.757353	26.9968	0.455398	0.853715
CH60_HUMAN	P10809	60 kDa heat shock protein, mitochondrial	HSPD1	CH60_HUMAN|P10809_K249	G-6599_DMSO_30min	-0.126179	0.366229	-0.344537	22.6828	0.733617	0.94957
CH60_HUMAN	P10809	60 kDa heat shock protein, mitochondrial	HSPD1	CH60_HUMAN|P10809_K292	G-6599_DMSO_30min	-0.30693	0.360454	-0.851507	22.9131	0.4033	0.827158
CH60_HUMAN	P10809	60 kDa heat shock protein, mitochondrial	HSPD1	CH60_HUMAN|P10809_K156	G-6599_DMSO_30min	-0.336115	0.407693	-0.824432	21.3241	0.418821	0.835098
CHAP1_HUMAN	Q96JM3	Chromosome alignment-maintaining phosphoprotein 1	CHAMP1	CHAP1_HUMAN|Q96JM3_K797	G-6599_DMSO_30min	0.443166	0.54749	0.809451	16.7999	0.429572	0.841744
CHD1_HUMAN	O14646	Chromodomain-helicase-DNA-binding protein 1	CHD1	CHD1_HUMAN|O14646_K1531	G-6599_DMSO_30min	-0.423295	0.602313	-0.702782	17.2814	0.491551	0.868751
CHD1_HUMAN	O14646	Chromodomain-helicase-DNA-binding protein 1	CHD1	CHD1_HUMAN|O14646_K1498	G-6599_DMSO_30min	-0.3515	0.401649	-0.87514	18.6797	0.392611	0.824931
CHD1L_HUMAN	Q86WJ1	Chromodomain-helicase-DNA-binding protein 1-like	CHD1L	CHD1L_HUMAN|Q86WJ1_K793	G-6599_DMSO_30min	-0.139748	0.295989	-0.47214	19.5798	0.642046	0.922083
CHD3_HUMAN	Q12873	Chromodomain-helicase-DNA-binding protein 3	CHD3	CHD3_HUMAN|Q12873_K48	G-6599_DMSO_30min	-0.7351	0.33285	-2.2085	27.1982	0.0358189	0.553837
CHD4_HUMAN	Q14839	Chromodomain-helicase-DNA-binding protein 4	CHD4	CHD4_HUMAN|Q14839_K1092	G-6599_DMSO_30min	-0.229457	0.525035	-0.437032	16.8435	0.667639	0.929231
CHD4_HUMAN	Q14839	Chromodomain-helicase-DNA-binding protein 4	CHD4	CHD4_HUMAN|Q14839_K1852	G-6599_DMSO_30min	-0.382516	0.282815	-1.35253	18.4328	0.192566	0.710683
CHD7_HUMAN	Q9P2D1	Chromodomain-helicase-DNA-binding protein 7	CHD7	CHD7_HUMAN|Q9P2D1_K1800	G-6599_DMSO_30min	-0.367031	0.255191	-1.43826	21.6937	0.164632	0.69168
CHD8_HUMAN	Q9HCK8	Chromodomain-helicase-DNA-binding protein 8	CHD8	CHD8_HUMAN|Q9HCK8_K1644	G-6599_DMSO_30min	0.220197	0.28696	0.767344	17.4628	0.453128	0.853715
CHERP_HUMAN	Q8IWX8	Calcium homeostasis endoplasmic reticulum protein	CHERP	CHERP_HUMAN|Q8IWX8_K177	G-6599_DMSO_30min	-0.275247	0.249005	-1.10539	17.8202	0.283692	0.780267
CHID1_HUMAN	Q9BWS9	Chitinase domain-containing protein 1	CHID1	CHID1_HUMAN|Q9BWS9_K56	G-6599_DMSO_30min	0.0716452	0.323557	0.22143	17.9822	0.827253	0.968923
CHK1_HUMAN	O14757	Serine/threonine-protein kinase Chk1	CHEK1	CHK1_HUMAN|O14757_K399	G-6599_DMSO_30min	-0.406684	0.340686	-1.19372	19.5053	0.246904	0.755788
CHK1_HUMAN	O14757	Serine/threonine-protein kinase Chk1	CHEK1	CHK1_HUMAN|O14757_K445	G-6599_DMSO_30min	-0.0167028	0.319636	-0.0522557	19.9896	0.958844	0.994244
CHK1_HUMAN	O14757	Serine/threonine-protein kinase Chk1	CHEK1	CHK1_HUMAN|O14757_K260	G-6599_DMSO_30min	-0.218669	0.236383	-0.925062	23.5218	0.364328	0.819202
CHK1_HUMAN	O14757	Serine/threonine-protein kinase Chk1	CHEK1	CHK1_HUMAN|O14757_K233	G-6599_DMSO_30min	-0.186306	0.249592	-0.746442	22.6982	0.463062	0.85814
CHK1_HUMAN	O14757	Serine/threonine-protein kinase Chk1	CHEK1	CHK1_HUMAN|O14757_K232	G-6599_DMSO_30min	-0.515952	0.270467	-1.90763	21.6479	0.0697924	0.596256
CHK1_HUMAN	O14757	Serine/threonine-protein kinase Chk1	CHEK1	CHK1_HUMAN|O14757_K166	G-6599_DMSO_30min	-0.0371523	0.305641	-0.121555	20.3741	0.904442	0.988943
CHK1_HUMAN	O14757	Serine/threonine-protein kinase Chk1	CHEK1	CHK1_HUMAN|O14757_K53	G-6599_DMSO_30min	-0.0163103	0.284127	-0.0574048	21.0916	0.954763	0.994021
CHK1_HUMAN	O14757	Serine/threonine-protein kinase Chk1	CHEK1	CHK1_HUMAN|O14757_K225	G-6599_DMSO_30min	-0.245715	0.254134	-0.96687	22.4457	0.343912	0.807831
CHK1_HUMAN	O14757	Serine/threonine-protein kinase Chk1	CHEK1	CHK1_HUMAN|O14757_K461	G-6599_DMSO_30min	-0.440087	0.266252	-1.6529	21.8387	0.112657	0.652347
CHM1A_HUMAN	Q9HD42	Charged multivesicular body protein 1a	CHMP1A	CHM1A_HUMAN|Q9HD42_K83	G-6599_DMSO_30min	-0.612516	0.298861	-2.0495	18.3111	0.0550165	0.589224
CHM1A_HUMAN	Q9HD42	Charged multivesicular body protein 1a	CHMP1A	CHM1A_HUMAN|Q9HD42_K75	G-6599_DMSO_30min	-0.362412	0.263227	-1.37681	18.9544	0.184618	0.706876
CHM1A_HUMAN	Q9HD42	Charged multivesicular body protein 1a	CHMP1A	CHM1A_HUMAN|Q9HD42_K40	G-6599_DMSO_30min	-0.460599	0.227609	-2.02364	19.9551	0.0566062	0.590169
CHM1A_HUMAN	Q9HD42	Charged multivesicular body protein 1a	CHMP1A	CHM1A_HUMAN|Q9HD42_K87	G-6599_DMSO_30min	-0.654709	0.335981	-1.94865	17.858	0.0672268	0.595947
CHM1B_HUMAN	Q7LBR1	Charged multivesicular body protein 1b	CHMP1B	CHM1B_HUMAN|Q7LBR1_K87	G-6599_DMSO_30min	-0.40766	0.259017	-1.57387	21.5182	0.130106	0.667972
CHM1B_HUMAN	Q7LBR1	Charged multivesicular body protein 1b	CHMP1B	CHM1B_HUMAN|Q7LBR1_K12	G-6599_DMSO_30min	-0.275249	0.394374	-0.697939	18.3655	0.493958	0.870304
CHM1B_HUMAN	Q7LBR1	Charged multivesicular body protein 1b	CHMP1B	CHM1B_HUMAN|Q7LBR1_K90	G-6599_DMSO_30min	-0.63614	0.309294	-2.05675	19.8194	0.0531154	0.588128
CHM1B_HUMAN	Q7LBR1	Charged multivesicular body protein 1b	CHMP1B	CHM1B_HUMAN|Q7LBR1_K59	G-6599_DMSO_30min	-0.152946	0.248624	-0.61517	22.0177	0.544749	0.888849
CHM2A_HUMAN	O43633	Charged multivesicular body protein 2a	CHMP2A	CHM2A_HUMAN|O43633_K124	G-6599_DMSO_30min	-0.445908	0.531099	-0.839594	16.8795	0.41287	0.83062
CHM2A_HUMAN	O43633	Charged multivesicular body protein 2a	CHMP2A	CHM2A_HUMAN|O43633_K104	G-6599_DMSO_30min	-0.255568	0.275936	-0.926185	18.7536	0.366116	0.819217
CHM2A_HUMAN	O43633	Charged multivesicular body protein 2a	CHMP2A	CHM2A_HUMAN|O43633_K118	G-6599_DMSO_30min	-0.425535	0.249022	-1.70882	19.3729	0.103457	0.645285
CHM2A_HUMAN	O43633	Charged multivesicular body protein 2a	CHMP2A	CHM2A_HUMAN|O43633_K89	G-6599_DMSO_30min	-0.551093	0.266784	-2.06569	18.9417	0.0528137	0.588128
CHM4B_HUMAN	Q9H444	Charged multivesicular body protein 4b	CHMP4B	CHM4B_HUMAN|Q9H444_K107	G-6599_DMSO_30min	-0.246019	0.345884	-0.711276	17.6053	0.486231	0.867613
CHMP3_HUMAN	Q9Y3E7	Charged multivesicular body protein 3	CHMP3	CHMP3_HUMAN|Q9Y3E7_K112	G-6599_DMSO_30min	-0.300595	0.293763	-1.02326	18.8784	0.319121	0.798411
CHMP5_HUMAN	Q9NZZ3	Charged multivesicular body protein 5	CHMP5	CHMP5_HUMAN|Q9NZZ3_K203	G-6599_DMSO_30min	0.715574	0.996184	0.718315	18.7982	0.481396	0.865912
CHP1_HUMAN	Q99653	Calcineurin B homologous protein 1	CHP1	CHP1_HUMAN|Q99653_K98	G-6599_DMSO_30min	-0.487867	0.300348	-1.62434	19.1572	0.120643	0.662325
CHRD1_HUMAN	Q9UHD1	Cysteine and histidine-rich domain-containing protein 1	CHORDC1	CHRD1_HUMAN|Q9UHD1_K89	G-6599_DMSO_30min	-0.522948	0.328022	-1.59424	17.9652	0.128323	0.665752
CHSP1_HUMAN	Q9Y2V2	Calcium-regulated heat stable protein 1	CARHSP1	CHSP1_HUMAN|Q9Y2V2_K64	G-6599_DMSO_30min	-0.491279	0.326431	-1.505	19.2955	0.148518	0.678181
CHSS2_HUMAN	Q8IZ52	Chondroitin sulfate synthase 2	CHPF	CHSS2_HUMAN|Q8IZ52_K101	G-6599_DMSO_30min	-0.33967	0.232755	-1.45935	20.1446	0.159888	0.69168
CHTOP_HUMAN	Q9Y3Y2	Chromatin target of PRMT1 protein	CHTOP	CHTOP_HUMAN|Q9Y3Y2_K70	G-6599_DMSO_30min	-0.269864	0.275876	-0.978208	21.1554	0.339026	0.806466
CHTOP_HUMAN	Q9Y3Y2	Chromatin target of PRMT1 protein	CHTOP	CHTOP_HUMAN|Q9Y3Y2_K226	G-6599_DMSO_30min	0.177884	0.570808	0.311635	17.2843	0.759045	0.955261
CIB1_HUMAN	Q99828	Calcium and integrin-binding protein 1	CIB1	CIB1_HUMAN|Q99828_K65	G-6599_DMSO_30min	-0.0496634	0.244814	-0.202861	18.209	0.841493	0.973201
CIP2A_HUMAN	Q8TCG1	Protein CIP2A	KIAA1524	CIP2A_HUMAN|Q8TCG1_K589	G-6599_DMSO_30min	0.304484	0.343126	0.887384	19.1492	0.385882	0.824931
CIP2A_HUMAN	Q8TCG1	Protein CIP2A	KIAA1524	CIP2A_HUMAN|Q8TCG1_K647	G-6599_DMSO_30min	0.113484	0.353076	0.321415	18.976	0.751409	0.953836
CIP2A_HUMAN	Q8TCG1	Protein CIP2A	KIAA1524	CIP2A_HUMAN|Q8TCG1_K40	G-6599_DMSO_30min	0.195037	0.441832	0.441429	17.9399	0.664177	0.928252
CIR1_HUMAN	Q86X95	Corepressor interacting with RBPJ 1	CIR1	CIR1_HUMAN|Q86X95_K11	G-6599_DMSO_30min	-0.699603	0.421372	-1.6603	16.9929	0.115193	0.656045
CIRBP_HUMAN	Q14011	Cold-inducible RNA-binding protein	CIRBP	CIRBP_HUMAN|Q14011_K39	G-6599_DMSO_30min	-0.03322	0.341374	-0.0973126	17.8273	0.923564	0.991061
CISD1_HUMAN	Q9NZ45	CDGSH iron-sulfur domain-containing protein 1	CISD1	CISD1_HUMAN|Q9NZ45_K79	G-6599_DMSO_30min	-0.00675931	0.261311	-0.0258669	27.9456	0.979547	0.997231
CISD1_HUMAN	Q9NZ45	CDGSH iron-sulfur domain-containing protein 1	CISD1	CISD1_HUMAN|Q9NZ45_K42	G-6599_DMSO_30min	-0.124854	0.278239	-0.448729	26.5553	0.657268	0.926309
CISD2_HUMAN	Q8N5K1	CDGSH iron-sulfur domain-containing protein 2	CISD2	CISD2_HUMAN|Q8N5K1_K95	G-6599_DMSO_30min	-0.651178	0.330004	-1.97324	20.1883	0.0623159	0.595573
CISY_HUMAN	O75390	Citrate synthase, mitochondrial	CS	CISY_HUMAN|O75390_K103	G-6599_DMSO_30min	-0.0944168	0.523059	-0.180509	19.4608	0.85862	0.976159
CK098_HUMAN	E9PRG8	Uncharacterized protein C11orf98	C11orf98	CK098_HUMAN|E9PRG8_K67	G-6599_DMSO_30min	-0.480211	0.337984	-1.42081	20.2345	0.1706	0.699019
CK5P2_HUMAN	Q96SN8	CDK5 regulatory subunit-associated protein 2	CDK5RAP2	CK5P2_HUMAN|Q96SN8_K675	G-6599_DMSO_30min	-0.314505	0.235991	-1.3327	20.7219	0.1971	0.714483
CK5P2_HUMAN	Q96SN8	CDK5 regulatory subunit-associated protein 2	CDK5RAP2	CK5P2_HUMAN|Q96SN8_K189	G-6599_DMSO_30min	-0.251681	0.295532	-0.851619	18.9914	0.405036	0.828561
CK5P2_HUMAN	Q96SN8	CDK5 regulatory subunit-associated protein 2	CDK5RAP2	CK5P2_HUMAN|Q96SN8_K1233	G-6599_DMSO_30min	-0.497928	0.334897	-1.48681	18.3476	0.154049	0.685018
CK5P3_HUMAN	Q96JB5	CDK5 regulatory subunit-associated protein 3	CDK5RAP3	CK5P3_HUMAN|Q96JB5_K166	G-6599_DMSO_30min	-0.355364	0.354396	-1.00273	19.0619	0.32855	0.802715
CKAP2_HUMAN	Q8WWK9	Cytoskeleton-associated protein 2	CKAP2	CKAP2_HUMAN|Q8WWK9_K513	G-6599_DMSO_30min	-0.15915	0.67453	-0.235942	16.7326	0.816341	0.966647
CKAP2_HUMAN	Q8WWK9	Cytoskeleton-associated protein 2	CKAP2	CKAP2_HUMAN|Q8WWK9_K606	G-6599_DMSO_30min	-0.422571	0.25004	-1.69002	20.2057	0.106396	0.645285
CKAP4_HUMAN	Q07065	Cytoskeleton-associated protein 4	CKAP4	CKAP4_HUMAN|Q07065_K551	G-6599_DMSO_30min	-0.371469	0.277786	-1.33725	22.3387	0.1946	0.713378
CKAP4_HUMAN	Q07065	Cytoskeleton-associated protein 4	CKAP4	CKAP4_HUMAN|Q07065_K223	G-6599_DMSO_30min	-0.378423	0.287626	-1.31567	21.8871	0.201899	0.718566
CKAP4_HUMAN	Q07065	Cytoskeleton-associated protein 4	CKAP4	CKAP4_HUMAN|Q07065_K188	G-6599_DMSO_30min	0.0018887	0.305979	0.00617265	21.1671	0.995133	0.998933
CKAP4_HUMAN	Q07065	Cytoskeleton-associated protein 4	CKAP4	CKAP4_HUMAN|Q07065_K566	G-6599_DMSO_30min	-0.00550109	0.409712	-0.0134267	18.8545	0.989428	0.997438
CKAP4_HUMAN	Q07065	Cytoskeleton-associated protein 4	CKAP4	CKAP4_HUMAN|Q07065_K490	G-6599_DMSO_30min	-0.310115	0.4657	-0.665911	18.231	0.513806	0.879384
CKAP5_HUMAN	Q14008	Cytoskeleton-associated protein 5	CKAP5	CKAP5_HUMAN|Q14008_K473	G-6599_DMSO_30min	-0.245289	0.465283	-0.527181	16.7461	0.604982	0.9097
CKAP5_HUMAN	Q14008	Cytoskeleton-associated protein 5	CKAP5	CKAP5_HUMAN|Q14008_K1769	G-6599_DMSO_30min	-0.186399	0.278869	-0.668412	17.703	0.512492	0.878039
CKAP5_HUMAN	Q14008	Cytoskeleton-associated protein 5	CKAP5	CKAP5_HUMAN|Q14008_K1838	G-6599_DMSO_30min	-0.507507	0.360017	-1.40968	17.0999	0.176564	0.702264
CKP2L_HUMAN	Q8IYA6	Cytoskeleton-associated protein 2-like	CKAP2L	CKP2L_HUMAN|Q8IYA6_K71	G-6599_DMSO_30min	-0.61777	0.277381	-2.22715	18.1707	0.0388113	0.553837
CL16A_HUMAN	Q2KHT3	Protein CLEC16A	CLEC16A	CL16A_HUMAN|Q2KHT3_K532	G-6599_DMSO_30min	-0.0639101	0.254126	-0.25149	20.3498	0.803958	0.965314
CL16A_HUMAN	Q2KHT3	Protein CLEC16A	CLEC16A	CL16A_HUMAN|Q2KHT3_K556	G-6599_DMSO_30min	-0.261673	0.2903	-0.901389	19.3189	0.378482	0.823239
CLAP1_HUMAN	Q7Z460	CLIP-associating protein 1	CLASP1	CLAP1_HUMAN|Q7Z460_K1075	G-6599_DMSO_30min	-0.589322	0.244279	-2.41249	18.3422	0.0265135	0.545928
CLAP1_HUMAN	Q7Z460	CLIP-associating protein 1	CLASP1	CLAP1_HUMAN|Q7Z460_K873	G-6599_DMSO_30min	-0.246883	0.283932	-0.869512	17.7711	0.396159	0.824931
CLCA_HUMAN	P09496	Clathrin light chain A	CLTA	CLCA_HUMAN|P09496_K242	G-6599_DMSO_30min	-0.503484	0.306485	-1.64277	18.7813	0.117068	0.660532
CLCA_HUMAN	P09496	Clathrin light chain A	CLTA	CLCA_HUMAN|P09496_K156	G-6599_DMSO_30min	-0.171621	0.323646	-0.530275	18.5027	0.602228	0.908084
CLCA_HUMAN	P09496	Clathrin light chain A	CLTA	CLCA_HUMAN|P09496_K223	G-6599_DMSO_30min	0.279973	0.546344	0.512448	16.9973	0.614932	0.910365
CLCB_HUMAN	P09497	Clathrin light chain B	CLTB	CLCB_HUMAN|P09497_K204	G-6599_DMSO_30min	-0.218717	0.257768	-0.848504	20.2144	0.406094	0.828561
CLCC1_HUMAN	Q96S66	Chloride channel CLIC-like protein 1	CLCC1	CLCC1_HUMAN|Q96S66_K45	G-6599_DMSO_30min	0.0806317	0.329796	0.24449	19.9842	0.809344	0.966437
CLCC1_HUMAN	Q96S66	Chloride channel CLIC-like protein 1	CLCC1	CLCC1_HUMAN|Q96S66_K414	G-6599_DMSO_30min	-0.491469	0.304793	-1.61247	20.6877	0.122011	0.662451
CLCC1_HUMAN	Q96S66	Chloride channel CLIC-like protein 1	CLCC1	CLCC1_HUMAN|Q96S66_K103	G-6599_DMSO_30min	-0.0119411	0.237104	-0.0503621	23.9771	0.960251	0.994356
CLCN7_HUMAN	P51798	H(+)/Cl(-) exchange transporter 7	CLCN7	CLCN7_HUMAN|P51798_K93	G-6599_DMSO_30min	-0.0858456	0.33392	-0.257085	18.6964	0.799921	0.964581
CLCN7_HUMAN	P51798	H(+)/Cl(-) exchange transporter 7	CLCN7	CLCN7_HUMAN|P51798_K88	G-6599_DMSO_30min	-0.143046	0.271907	-0.526084	20.0645	0.604597	0.9097
CLH1_HUMAN	Q00610	Clathrin heavy chain 1	CLTC	CLH1_HUMAN|Q00610_K737	G-6599_DMSO_30min	-0.221185	0.258156	-0.856791	18.4295	0.402564	0.827158
CLH1_HUMAN	Q00610	Clathrin heavy chain 1	CLTC	CLH1_HUMAN|Q00610_K619	G-6599_DMSO_30min	0.770023	0.98216	0.78401	16.3749	0.444228	0.851584
CLH1_HUMAN	Q00610	Clathrin heavy chain 1	CLTC	CLH1_HUMAN|Q00610_K500	G-6599_DMSO_30min	-0.262238	0.306472	-0.855666	17.7648	0.403576	0.827279
CLH1_HUMAN	Q00610	Clathrin heavy chain 1	CLTC	CLH1_HUMAN|Q00610_K806	G-6599_DMSO_30min	-0.491842	0.268241	-1.83358	18.2586	0.08307	0.625206
CLH1_HUMAN	Q00610	Clathrin heavy chain 1	CLTC	CLH1_HUMAN|Q00610_K1441	G-6599_DMSO_30min	-0.140665	0.288295	-0.48792	17.9737	0.631505	0.918917
CLH1_HUMAN	Q00610	Clathrin heavy chain 1	CLTC	CLH1_HUMAN|Q00610_K507	G-6599_DMSO_30min	-0.563304	0.35705	-1.57766	17.3485	0.132702	0.667972
CLH1_HUMAN	Q00610	Clathrin heavy chain 1	CLTC	CLH1_HUMAN|Q00610_K798	G-6599_DMSO_30min	-0.343869	0.269562	-1.27566	18.2378	0.218086	0.733764
CLH1_HUMAN	Q00610	Clathrin heavy chain 1	CLTC	CLH1_HUMAN|Q00610_K941	G-6599_DMSO_30min	0.0317124	0.372625	0.0851055	17.2544	0.933157	0.991061
CLH1_HUMAN	Q00610	Clathrin heavy chain 1	CLTC	CLH1_HUMAN|Q00610_K1179	G-6599_DMSO_30min	-0.0877254	0.393582	-0.222889	17.1456	0.826255	0.968923
CLH1_HUMAN	Q00610	Clathrin heavy chain 1	CLTC	CLH1_HUMAN|Q00610_K86	G-6599_DMSO_30min	-0.268688	0.252314	-1.06489	18.5386	0.300597	0.791012
CLH1_HUMAN	Q00610	Clathrin heavy chain 1	CLTC	CLH1_HUMAN|Q00610_K764	G-6599_DMSO_30min	-0.212197	0.265435	-0.799431	18.3041	0.434293	0.84411
CLH1_HUMAN	Q00610	Clathrin heavy chain 1	CLTC	CLH1_HUMAN|Q00610_K450	G-6599_DMSO_30min	-0.23282	0.247124	-0.942119	18.6426	0.358181	0.815854
CLH1_HUMAN	Q00610	Clathrin heavy chain 1	CLTC	CLH1_HUMAN|Q00610_K1535	G-6599_DMSO_30min	-0.273374	0.367303	-0.744272	17.2852	0.46671	0.858967
CLH1_HUMAN	Q00610	Clathrin heavy chain 1	CLTC	CLH1_HUMAN|Q00610_K96	G-6599_DMSO_30min	-0.516698	0.253662	-2.03696	18.5127	0.0562119	0.590169
CLH1_HUMAN	Q00610	Clathrin heavy chain 1	CLTC	CLH1_HUMAN|Q00610_K1118	G-6599_DMSO_30min	-0.187501	0.271507	-0.690596	18.2076	0.49853	0.871731
CLIC1_HUMAN	O00299	Chloride intracellular channel protein 1	CLIC1	CLIC1_HUMAN|O00299_K193	G-6599_DMSO_30min	1.0244	0.981703	1.04349	16.5754	0.311701	0.795089
CLIC1_HUMAN	O00299	Chloride intracellular channel protein 1	CLIC1	CLIC1_HUMAN|O00299_K131	G-6599_DMSO_30min	0.458471	0.797501	0.574885	16.7555	0.573008	0.896679
CLIC1_HUMAN	O00299	Chloride intracellular channel protein 1	CLIC1	CLIC1_HUMAN|O00299_K192	G-6599_DMSO_30min	1.30049	0.9581	1.35737	15.5706	0.194015	0.713229
CLIC1_HUMAN	O00299	Chloride intracellular channel protein 1	CLIC1	CLIC1_HUMAN|O00299_K49	G-6599_DMSO_30min	-0.420869	0.347887	-1.20979	19.1635	0.241074	0.751501
CLIC1_HUMAN	O00299	Chloride intracellular channel protein 1	CLIC1	CLIC1_HUMAN|O00299_K119	G-6599_DMSO_30min	-0.276528	0.296961	-0.931191	20.3601	0.362666	0.818607
CLIC1_HUMAN	O00299	Chloride intracellular channel protein 1	CLIC1	CLIC1_HUMAN|O00299_K95	G-6599_DMSO_30min	0.258586	0.558927	0.462646	17.3156	0.649379	0.924673
CLIC4_HUMAN	Q9Y696	Chloride intracellular channel protein 4	CLIC4	CLIC4_HUMAN|Q9Y696_K60	G-6599_DMSO_30min	-0.823695	0.308995	-2.66572	17.8085	0.0158549	0.509558
CLIP1_HUMAN	P30622	CAP-Gly domain-containing linker protein 1	CLIP1	CLIP1_HUMAN|P30622_K647	G-6599_DMSO_30min	-0.193246	0.427318	-0.45223	16.9944	0.656822	0.926309
CLIP1_HUMAN	P30622	CAP-Gly domain-containing linker protein 1	CLIP1	CLIP1_HUMAN|P30622_K589	G-6599_DMSO_30min	-0.232913	0.427953	-0.544251	16.9921	0.59334	0.905892
CLIP4_HUMAN	Q8N3C7	CAP-Gly domain-containing linker protein 4	CLIP4	CLIP4_HUMAN|Q8N3C7_K348	G-6599_DMSO_30min	-0.140106	0.261469	-0.53584	17.9925	0.598631	0.905918
CLK1_HUMAN	P49759	Dual specificity protein kinase CLK1	CLK1	CLK1_HUMAN|P49759_K182	G-6599_DMSO_30min	-0.624122	0.321462	-1.94151	18.3504	0.0677115	0.595947
CLK1_HUMAN	P49759	Dual specificity protein kinase CLK1	CLK1	CLK1_HUMAN|P49759_K473	G-6599_DMSO_30min	-1.26193	0.357776	-3.52716	17.9236	0.00241984	0.300874
CLK2_HUMAN	P49760	Dual specificity protein kinase CLK2	CLK2	CLK2_HUMAN|P49760_K489	G-6599_DMSO_30min	-0.857239	0.448315	-1.91213	17.1315	0.0727306	0.605921
CLK3_HUMAN	P49761	Dual specificity protein kinase CLK3	CLK3	CLK3_HUMAN|P49761_K317	G-6599_DMSO_30min	-0.411113	0.739335	-0.556057	16.4961	0.585636	0.90367
CLP1_HUMAN	Q92989	Polyribonucleotide 5'-hydroxyl-kinase Clp1	CLP1	CLP1_HUMAN|Q92989_K281	G-6599_DMSO_30min	-0.0737847	0.269087	-0.274204	17.9174	0.787064	0.962414
CLP1_HUMAN	Q92989	Polyribonucleotide 5'-hydroxyl-kinase Clp1	CLP1	CLP1_HUMAN|Q92989_K320	G-6599_DMSO_30min	-0.450708	0.335156	-1.34477	17.3003	0.196066	0.714483
CLP1L_HUMAN	Q96KA5	Cleft lip and palate transmembrane protein 1-like protein	CLPTM1L	CLP1L_HUMAN|Q96KA5_K517	G-6599_DMSO_30min	-0.341443	0.263126	-1.29764	21.17	0.208373	0.726559
CLP1L_HUMAN	Q96KA5	Cleft lip and palate transmembrane protein 1-like protein	CLPTM1L	CLP1L_HUMAN|Q96KA5_K199	G-6599_DMSO_30min	-0.13204	0.232531	-0.567841	22.7167	0.575713	0.897576
CLPT1_HUMAN	O96005	Cleft lip and palate transmembrane protein 1	CLPTM1	CLPT1_HUMAN|O96005_K460	G-6599_DMSO_30min	0.0763552	0.450612	0.169448	17.9436	0.86734	0.979828
CLPT1_HUMAN	O96005	Cleft lip and palate transmembrane protein 1	CLPTM1	CLPT1_HUMAN|O96005_K644	G-6599_DMSO_30min	-0.0902374	0.424473	-0.212587	18.1723	0.834015	0.970537
CLU_HUMAN	O75153	Clustered mitochondria protein homolog	CLUH	CLU_HUMAN|O75153_K509	G-6599_DMSO_30min	-0.37812	0.378628	-0.998658	18.2959	0.330986	0.803357
CLUA1_HUMAN	Q96AJ1	Clusterin-associated protein 1	CLUAP1	CLUA1_HUMAN|Q96AJ1_K190	G-6599_DMSO_30min	0.0573202	0.255541	0.224309	18.3266	0.824998	0.968496
CLUA1_HUMAN	Q96AJ1	Clusterin-associated protein 1	CLUAP1	CLUA1_HUMAN|Q96AJ1_K198	G-6599_DMSO_30min	-0.150849	0.246269	-0.612539	18.4969	0.547639	0.888969
CMBL_HUMAN	Q96DG6	Carboxymethylenebutenolidase homolog	CMBL	CMBL_HUMAN|Q96DG6_K193	G-6599_DMSO_30min	0.161803	0.287496	0.5628	20.1237	0.579788	0.900694
CMBL_HUMAN	Q96DG6	Carboxymethylenebutenolidase homolog	CMBL	CMBL_HUMAN|Q96DG6_K36	G-6599_DMSO_30min	-0.139591	0.277764	-0.502552	20.4268	0.620655	0.913788
CMIP_HUMAN	Q8IY22	C-Maf-inducing protein	CMIP	CMIP_HUMAN|Q8IY22_K74	G-6599_DMSO_30min	-0.159694	0.243611	-0.655529	21.8761	0.518962	0.88314
CMS1_HUMAN	Q9BQ75	Protein CMSS1	CMSS1	CMS1_HUMAN|Q9BQ75_K199	G-6599_DMSO_30min	-0.407886	0.244787	-1.66629	18.8548	0.112183	0.652347
CMTR1_HUMAN	Q8N1G2	Cap-specific mRNA (nucleoside-2'-O-)-methyltransferase 1	CMTR1	CMTR1_HUMAN|Q8N1G2_K646	G-6599_DMSO_30min	-0.1866	0.337866	-0.552289	18.0488	0.587525	0.904609
CN119_HUMAN	Q9NWQ9	Uncharacterized protein C14orf119	C14orf119	CN119_HUMAN|Q9NWQ9_K139	G-6599_DMSO_30min	-0.498336	0.395828	-1.25897	18.0056	0.224119	0.736476
CN37_HUMAN	P09543	2',3'-cyclic-nucleotide 3'-phosphodiesterase	CNP	CN37_HUMAN|P09543_K162	G-6599_DMSO_30min	-0.650251	0.262516	-2.477	19.8626	0.0223688	0.529978
CN37_HUMAN	P09543	2',3'-cyclic-nucleotide 3'-phosphodiesterase	CNP	CN37_HUMAN|P09543_K175	G-6599_DMSO_30min	-0.662936	0.270181	-2.45368	19.6434	0.023616	0.536582
CN37_HUMAN	P09543	2',3'-cyclic-nucleotide 3'-phosphodiesterase	CNP	CN37_HUMAN|P09543_K87	G-6599_DMSO_30min	-0.377634	0.250689	-1.50638	20.245	0.147414	0.677931
CN37_HUMAN	P09543	2',3'-cyclic-nucleotide 3'-phosphodiesterase	CNP	CN37_HUMAN|P09543_K204	G-6599_DMSO_30min	-0.242104	0.286109	-0.846192	19.2474	0.407843	0.829035
CND1_HUMAN	Q15021	Condensin complex subunit 1	NCAPD2	CND1_HUMAN|Q15021_K35	G-6599_DMSO_30min	-0.827033	0.295105	-2.8025	20.1454	0.0109463	0.466658
CND1_HUMAN	Q15021	Condensin complex subunit 1	NCAPD2	CND1_HUMAN|Q15021_K1110	G-6599_DMSO_30min	-0.344203	0.33187	-1.03716	19.2682	0.312501	0.795194
CND1_HUMAN	Q15021	Condensin complex subunit 1	NCAPD2	CND1_HUMAN|Q15021_K580	G-6599_DMSO_30min	-0.408608	0.289193	-1.41292	20.3217	0.172812	0.699019
CND1_HUMAN	Q15021	Condensin complex subunit 1	NCAPD2	CND1_HUMAN|Q15021_K685	G-6599_DMSO_30min	-0.61606	0.296665	-2.07662	20.1008	0.0508723	0.582956
CND1_HUMAN	Q15021	Condensin complex subunit 1	NCAPD2	CND1_HUMAN|Q15021_K705	G-6599_DMSO_30min	-0.436665	0.259849	-1.68046	21.402	0.107407	0.645285
CND1_HUMAN	Q15021	Condensin complex subunit 1	NCAPD2	CND1_HUMAN|Q15021_K1199	G-6599_DMSO_30min	-0.427204	0.275444	-1.55096	20.781	0.136008	0.667972
CND2_HUMAN	Q15003	Condensin complex subunit 2	NCAPH	CND2_HUMAN|Q15003_K452	G-6599_DMSO_30min	-0.847466	0.256449	-3.30461	19.9415	0.00354905	0.358493
CND2_HUMAN	Q15003	Condensin complex subunit 2	NCAPH	CND2_HUMAN|Q15003_K637	G-6599_DMSO_30min	-0.632074	0.26725	-2.3651	19.6246	0.0284526	0.545928
CND3_HUMAN	Q9BPX3	Condensin complex subunit 3	NCAPG	CND3_HUMAN|Q9BPX3_K235	G-6599_DMSO_30min	-0.515396	0.240939	-2.13911	18.9881	0.0456341	0.569157
CND3_HUMAN	Q9BPX3	Condensin complex subunit 3	NCAPG	CND3_HUMAN|Q9BPX3_K208	G-6599_DMSO_30min	-0.674052	0.253748	-2.65639	18.7	0.0157251	0.509558
CND3_HUMAN	Q9BPX3	Condensin complex subunit 3	NCAPG	CND3_HUMAN|Q9BPX3_K503	G-6599_DMSO_30min	-0.404133	0.56469	-0.715673	16.704	0.484078	0.86687
CND3_HUMAN	Q9BPX3	Condensin complex subunit 3	NCAPG	CND3_HUMAN|Q9BPX3_K522	G-6599_DMSO_30min	-0.345321	0.299009	-1.15488	17.9774	0.263258	0.764164
CND3_HUMAN	Q9BPX3	Condensin complex subunit 3	NCAPG	CND3_HUMAN|Q9BPX3_K226	G-6599_DMSO_30min	-0.502966	0.238188	-2.11163	19.0567	0.048149	0.57658
CND3_HUMAN	Q9BPX3	Condensin complex subunit 3	NCAPG	CND3_HUMAN|Q9BPX3_K537	G-6599_DMSO_30min	-0.111251	0.385707	-0.288434	17.2608	0.77645	0.95959
CNDD3_HUMAN	P42695	Condensin-2 complex subunit D3	NCAPD3	CNDD3_HUMAN|P42695_K597	G-6599_DMSO_30min	0.232903	0.311372	0.747988	31.8297	0.459958	0.856583
CNDD3_HUMAN	P42695	Condensin-2 complex subunit D3	NCAPD3	CNDD3_HUMAN|P42695_K148	G-6599_DMSO_30min	-0.296371	0.309396	-0.957902	31.7335	0.345354	0.809379
CNDD3_HUMAN	P42695	Condensin-2 complex subunit D3	NCAPD3	CNDD3_HUMAN|P42695_K939	G-6599_DMSO_30min	-0.23279	0.309792	-0.751439	31.7539	0.457922	0.855185
CNDD3_HUMAN	P42695	Condensin-2 complex subunit D3	NCAPD3	CNDD3_HUMAN|P42695_K1246	G-6599_DMSO_30min	0.145222	0.401117	0.362045	28.9692	0.719946	0.945847
CNDG2_HUMAN	Q86XI2	Condensin-2 complex subunit G2	NCAPG2	CNDG2_HUMAN|Q86XI2_K790	G-6599_DMSO_30min	-0.569868	0.308256	-1.84868	19.6125	0.0796379	0.619603
CNDG2_HUMAN	Q86XI2	Condensin-2 complex subunit G2	NCAPG2	CNDG2_HUMAN|Q86XI2_K809	G-6599_DMSO_30min	-0.0802173	0.366715	-0.218745	18.5633	0.829235	0.9692
CNDH2_HUMAN	Q6IBW4	Condensin-2 complex subunit H2	NCAPH2	CNDH2_HUMAN|Q6IBW4_K382	G-6599_DMSO_30min	-0.27574	0.273016	-1.00998	18.0432	0.325859	0.800869
CNDP2_HUMAN	Q96KP4	Cytosolic non-specific dipeptidase	CNDP2	CNDP2_HUMAN|Q96KP4_K301	G-6599_DMSO_30min	0.0292177	0.307916	0.0948884	18.1691	0.925442	0.991061
CNDP2_HUMAN	Q96KP4	Cytosolic non-specific dipeptidase	CNDP2	CNDP2_HUMAN|Q96KP4_K474	G-6599_DMSO_30min	-0.0541405	0.584934	-0.0925583	16.7479	0.927353	0.991061
CNN2_HUMAN	Q99439	Calponin-2	CNN2	CNN2_HUMAN|Q99439_K234	G-6599_DMSO_30min	0.4844	0.551577	0.878208	16.9692	0.392096	0.824931
CNN2_HUMAN	Q99439	Calponin-2	CNN2	CNN2_HUMAN|Q99439_K55	G-6599_DMSO_30min	-0.508283	0.293098	-1.73418	18.9843	0.0990958	0.636286
CNN2_HUMAN	Q99439	Calponin-2	CNN2	CNN2_HUMAN|Q99439_K239	G-6599_DMSO_30min	0.275489	0.739201	0.372685	15.6133	0.714394	0.944559
CNN2_HUMAN	Q99439	Calponin-2	CNN2	CNN2_HUMAN|Q99439_K25	G-6599_DMSO_30min	-0.661589	0.274625	-2.40906	19.3968	0.026078	0.545928
CNN3_HUMAN	Q15417	Calponin-3	CNN3	CNN3_HUMAN|Q15417_K256	G-6599_DMSO_30min	-0.620148	0.359058	-1.72715	19.9842	0.099566	0.636447
CNN3_HUMAN	Q15417	Calponin-3	CNN3	CNN3_HUMAN|Q15417_K158	G-6599_DMSO_30min	-0.628964	0.318166	-1.97684	21.1183	0.0612622	0.595573
CNN3_HUMAN	Q15417	Calponin-3	CNN3	CNN3_HUMAN|Q15417_K251	G-6599_DMSO_30min	-0.320999	0.388268	-0.826745	19.4006	0.418434	0.834508
CNN3_HUMAN	Q15417	Calponin-3	CNN3	CNN3_HUMAN|Q15417_K232	G-6599_DMSO_30min	-0.15918	0.509715	-0.312293	18.0099	0.758405	0.955261
CNN3_HUMAN	Q15417	Calponin-3	CNN3	CNN3_HUMAN|Q15417_K172	G-6599_DMSO_30min	-0.796859	0.439634	-1.81255	18.6612	0.0860219	0.626271
CNN3_HUMAN	Q15417	Calponin-3	CNN3	CNN3_HUMAN|Q15417_K17	G-6599_DMSO_30min	-0.148856	0.695687	-0.21397	13.9943	0.833657	0.970365
CNNM3_HUMAN	Q8NE01	Metal transporter CNNM3	CNNM3	CNNM3_HUMAN|Q8NE01_K407	G-6599_DMSO_30min	-0.174153	0.266881	-0.652551	20.4956	0.521298	0.884199
CNNM3_HUMAN	Q8NE01	Metal transporter CNNM3	CNNM3	CNNM3_HUMAN|Q8NE01_K519	G-6599_DMSO_30min	-0.311182	0.288172	-1.07985	19.8399	0.293163	0.787939
CNNM3_HUMAN	Q8NE01	Metal transporter CNNM3	CNNM3	CNNM3_HUMAN|Q8NE01_K464	G-6599_DMSO_30min	-0.177666	0.25192	-0.705247	21.0697	0.488381	0.868316
CNNM4_HUMAN	Q6P4Q7	Metal transporter CNNM4	CNNM4	CNNM4_HUMAN|Q6P4Q7_K536	G-6599_DMSO_30min	-0.0348475	0.321524	-0.108382	19.3052	0.914811	0.989723
CNNM4_HUMAN	Q6P4Q7	Metal transporter CNNM4	CNNM4	CNNM4_HUMAN|Q6P4Q7_K543	G-6599_DMSO_30min	0.00102775	0.333667	0.00308016	19.0703	0.997574	0.999539
CNNM4_HUMAN	Q6P4Q7	Metal transporter CNNM4	CNNM4	CNNM4_HUMAN|Q6P4Q7_K589	G-6599_DMSO_30min	-0.183158	0.28073	-0.652435	20.3545	0.521421	0.884199
CNOT1_HUMAN	A5YKK6	CCR4-NOT transcription complex subunit 1	CNOT1	CNOT1_HUMAN|A5YKK6_K1414	G-6599_DMSO_30min	0.72106	0.285648	2.5243	18.9867	0.0206602	0.529953
CNOT1_HUMAN	A5YKK6	CCR4-NOT transcription complex subunit 1	CNOT1	CNOT1_HUMAN|A5YKK6_K1470	G-6599_DMSO_30min	0.327162	0.35837	0.912917	17.9373	0.373394	0.823137
CNOT8_HUMAN	Q9UFF9	CCR4-NOT transcription complex subunit 8	CNOT8	CNOT8_HUMAN|Q9UFF9_K254	G-6599_DMSO_30min	0.228812	0.364368	0.627969	17.0467	0.538347	0.886177
CNOT9_HUMAN	Q92600	NA	NA	CNOT9_HUMAN|Q92600_K44	G-6599_DMSO_30min	-0.0829192	0.248286	-0.333967	21.3299	0.741666	0.952815
CNOT9_HUMAN	Q92600	NA	NA	CNOT9_HUMAN|Q92600_K267	G-6599_DMSO_30min	0.00839937	0.2692	0.0312012	20.5017	0.975411	0.997104
CNOT9_HUMAN	Q92600	NA	NA	CNOT9_HUMAN|Q92600_K281	G-6599_DMSO_30min	0.14108	0.274875	0.513251	20.3117	0.613314	0.909948
CNOT9_HUMAN	Q92600	NA	NA	CNOT9_HUMAN|Q92600_K21	G-6599_DMSO_30min	-0.410138	1.02168	-0.401435	15.4835	0.693586	0.938143
CNTLN_HUMAN	Q9NXG0	Centlein	CNTLN	CNTLN_HUMAN|Q9NXG0_K169	G-6599_DMSO_30min	-0.0329079	0.556844	-0.0590972	24.6659	0.953351	0.993946
COA1_HUMAN	Q9GZY4	Cytochrome c oxidase assembly factor 1 homolog	COA1	COA1_HUMAN|Q9GZY4_K74	G-6599_DMSO_30min	0.252402	0.290319	0.869397	22.3871	0.393856	0.824931
COA1_HUMAN	Q9GZY4	Cytochrome c oxidase assembly factor 1 homolog	COA1	COA1_HUMAN|Q9GZY4_K88	G-6599_DMSO_30min	0.181866	0.313377	0.580343	21.4324	0.567736	0.894545
COA1_HUMAN	Q9GZY4	Cytochrome c oxidase assembly factor 1 homolog	COA1	COA1_HUMAN|Q9GZY4_K48	G-6599_DMSO_30min	0.0460811	0.327815	0.14057	20.9424	0.889553	0.984794
COA7_HUMAN	Q96BR5	Cytochrome c oxidase assembly factor 7	COA7	COA7_HUMAN|Q96BR5_K223	G-6599_DMSO_30min	-0.0620645	0.379754	-0.163433	17.7729	0.872021	0.980155
COASY_HUMAN	Q13057	Bifunctional coenzyme A synthase	COASY	COASY_HUMAN|Q13057_K235	G-6599_DMSO_30min	0.118871	0.36648	0.32436	17.9214	0.749421	0.953836
CODA1_HUMAN	Q5TAT6	Collagen alpha-1(XIII) chain	COL13A1	CODA1_HUMAN|Q5TAT6_K99	G-6599_DMSO_30min	-0.377786	0.232851	-1.62244	19.257	0.120967	0.662325
COF1_HUMAN	P23528	Cofilin-1	CFL1	COF1_HUMAN|P23528_K144	G-6599_DMSO_30min	-0.246229	0.389445	-0.632258	17.7069	0.535298	0.886063
COF1_HUMAN	P23528	Cofilin-1	CFL1	COF1_HUMAN|P23528_K114	G-6599_DMSO_30min	-0.327271	0.261804	-1.25006	19.6531	0.225958	0.737384
COF1_HUMAN	P23528	Cofilin-1	CFL1	COF1_HUMAN|P23528_K92	G-6599_DMSO_30min	-0.395311	0.315303	-1.25375	18.5301	0.225521	0.737384
COF1_HUMAN	P23528	Cofilin-1	CFL1	COF1_HUMAN|P23528_K121	G-6599_DMSO_30min	-0.346415	0.271625	-1.27534	19.3919	0.217256	0.73285
COF1_HUMAN	P23528	Cofilin-1	CFL1	COF1_HUMAN|P23528_K73	G-6599_DMSO_30min	-0.189234	0.548542	-0.344976	16.96	0.734354	0.94957
COF1_HUMAN	P23528	Cofilin-1	CFL1	COF1_HUMAN|P23528_K44	G-6599_DMSO_30min	-0.0120785	0.437098	-0.0276334	17.3928	0.978269	0.997104
COG2_HUMAN	Q14746	Conserved oligomeric Golgi complex subunit 2	COG2	COG2_HUMAN|Q14746_K153	G-6599_DMSO_30min	0.106567	0.432688	0.246291	17.0858	0.808391	0.965908
COG4_HUMAN	Q9H9E3	Conserved oligomeric Golgi complex subunit 4	COG4	COG4_HUMAN|Q9H9E3_K73	G-6599_DMSO_30min	-0.097812	0.305601	-0.320064	18.061	0.752593	0.953836
COMD2_HUMAN	Q86X83	COMM domain-containing protein 2	COMMD2	COMD2_HUMAN|Q86X83_K145	G-6599_DMSO_30min	0.28484	0.270003	1.05495	21.123	0.303365	0.793256
COMD3_HUMAN	Q9UBI1	COMM domain-containing protein 3	COMMD3	COMD3_HUMAN|Q9UBI1_K137	G-6599_DMSO_30min	-0.382958	0.24066	-1.59128	22.7343	0.125357	0.665288
COMD4_HUMAN	Q9H0A8	COMM domain-containing protein 4	COMMD4	COMD4_HUMAN|Q9H0A8_K119	G-6599_DMSO_30min	-0.248236	0.268525	-0.924443	23.6494	0.364593	0.819217
COMD4_HUMAN	Q9H0A8	COMM domain-containing protein 4	COMMD4	COMD4_HUMAN|Q9H0A8_K53	G-6599_DMSO_30min	-0.331747	0.275722	-1.20319	23.2299	0.24102	0.751501
COMD6_HUMAN	Q7Z4G1	COMM domain-containing protein 6	COMMD6	COMD6_HUMAN|Q7Z4G1_K57	G-6599_DMSO_30min	-0.0322129	0.266768	-0.120753	20.1039	0.905086	0.988943
COMD6_HUMAN	Q7Z4G1	COMM domain-containing protein 6	COMMD6	COMD6_HUMAN|Q7Z4G1_K39	G-6599_DMSO_30min	-0.307097	0.317436	-0.967429	18.8942	0.345551	0.809456
COMD7_HUMAN	Q86VX2	COMM domain-containing protein 7	COMMD7	COMD7_HUMAN|Q86VX2_K90	G-6599_DMSO_30min	-0.218551	0.362409	-0.603051	19.3801	0.553467	0.890628
COMD9_HUMAN	Q9P000	COMM domain-containing protein 9	COMMD9	COMD9_HUMAN|Q9P000_K133	G-6599_DMSO_30min	-0.259869	0.25699	-1.0112	18.2432	0.325143	0.800192
COP1_HUMAN	Q8NHY2	NA	NA	COP1_HUMAN|Q8NHY2_K673	G-6599_DMSO_30min	-0.679534	0.248088	-2.73908	18.9122	0.0130767	0.488622
COP1_HUMAN	Q8NHY2	NA	NA	COP1_HUMAN|Q8NHY2_K684	G-6599_DMSO_30min	-0.234958	0.244569	-0.960703	18.9953	0.348772	0.811623
COPA_HUMAN	P53621	Coatomer subunit alpha	COPA	COPA_HUMAN|P53621_K574	G-6599_DMSO_30min	-0.388644	0.290148	-1.33947	17.8752	0.197201	0.714483
COPA_HUMAN	P53621	Coatomer subunit alpha	COPA	COPA_HUMAN|P53621_K993	G-6599_DMSO_30min	-0.40418	0.268827	-1.5035	18.1603	0.149903	0.679441
COPA_HUMAN	P53621	Coatomer subunit alpha	COPA	COPA_HUMAN|P53621_K362	G-6599_DMSO_30min	-0.315555	0.368373	-0.856619	17.2337	0.40341	0.827158
COPA_HUMAN	P53621	Coatomer subunit alpha	COPA	COPA_HUMAN|P53621_K438	G-6599_DMSO_30min	0.657139	0.852607	0.770741	16.414	0.451813	0.853715
COPA_HUMAN	P53621	Coatomer subunit alpha	COPA	COPA_HUMAN|P53621_K76	G-6599_DMSO_30min	-0.113298	0.231763	-0.48885	18.8723	0.63058	0.91814
COPA_HUMAN	P53621	Coatomer subunit alpha	COPA	COPA_HUMAN|P53621_K825	G-6599_DMSO_30min	-0.321955	0.255236	-1.2614	18.3833	0.222937	0.735751
COPA_HUMAN	P53621	Coatomer subunit alpha	COPA	COPA_HUMAN|P53621_K480	G-6599_DMSO_30min	0.026287	0.338308	0.0777015	17.4261	0.938951	0.991365
COPA_HUMAN	P53621	Coatomer subunit alpha	COPA	COPA_HUMAN|P53621_K598	G-6599_DMSO_30min	-0.176686	0.300065	-0.588825	17.7638	0.563392	0.893603
COPA_HUMAN	P53621	Coatomer subunit alpha	COPA	COPA_HUMAN|P53621_K619	G-6599_DMSO_30min	-0.333931	0.261972	-1.27468	18.2682	0.218397	0.733978
COPB_HUMAN	P53618	Coatomer subunit beta	COPB1	COPB_HUMAN|P53618_K107	G-6599_DMSO_30min	-0.016622	0.26454	-0.0628335	30.8599	0.950304	0.9932
COPB_HUMAN	P53618	Coatomer subunit beta	COPB1	COPB_HUMAN|P53618_K128	G-6599_DMSO_30min	0.36136	0.657812	0.549336	18.4205	0.589373	0.905405
COPB_HUMAN	P53618	Coatomer subunit beta	COPB1	COPB_HUMAN|P53618_K712	G-6599_DMSO_30min	-0.10727	0.295835	-0.362602	28.4212	0.719585	0.945593
COPB2_HUMAN	P35606	Coatomer subunit beta'	COPB2	COPB2_HUMAN|P35606_K425	G-6599_DMSO_30min	-0.00165877	0.979741	-0.00169307	16.4076	0.99867	0.999539
COPB2_HUMAN	P35606	Coatomer subunit beta'	COPB2	COPB2_HUMAN|P35606_K724	G-6599_DMSO_30min	-0.356254	0.314738	-1.13191	18.0182	0.272513	0.772654
COPB2_HUMAN	P35606	Coatomer subunit beta'	COPB2	COPB2_HUMAN|P35606_K212	G-6599_DMSO_30min	-0.150491	0.261566	-0.575347	18.8736	0.571853	0.896191
COPB2_HUMAN	P35606	Coatomer subunit beta'	COPB2	COPB2_HUMAN|P35606_K627	G-6599_DMSO_30min	4.19624	1.77649	2.3621	15.2814	0.0318377	0.545928
COPD_HUMAN	P48444	Coatomer subunit delta	ARCN1	COPD_HUMAN|P48444_K336	G-6599_DMSO_30min	-0.0444945	0.242943	-0.183148	19.0358	0.856619	0.976159
COPD_HUMAN	P48444	Coatomer subunit delta	ARCN1	COPD_HUMAN|P48444_K63	G-6599_DMSO_30min	-0.231116	0.327449	-0.705807	17.7257	0.489482	0.868611
COPE_HUMAN	O14579	Coatomer subunit epsilon	COPE	COPE_HUMAN|O14579_K278	G-6599_DMSO_30min	-0.647388	0.265308	-2.44013	23.5018	0.0226172	0.530831
COPG1_HUMAN	Q9Y678	Coatomer subunit gamma-1	COPG1	COPG1_HUMAN|Q9Y678_K631	G-6599_DMSO_30min	-0.03907	0.310589	-0.125793	17.2448	0.90135	0.988612
COPG1_HUMAN	Q9Y678	Coatomer subunit gamma-1	COPG1	COPG1_HUMAN|Q9Y678_K600	G-6599_DMSO_30min	0.0421618	0.326232	0.129239	17.1474	0.898673	0.987755
COPG2_HUMAN	Q9UBF2	Coatomer subunit gamma-2	COPG2	COPG2_HUMAN|Q9UBF2_K599	G-6599_DMSO_30min	0.293262	0.368391	0.796062	20.756	0.435007	0.844831
COPZ1_HUMAN	P61923	Coatomer subunit zeta-1	COPZ1	COPZ1_HUMAN|P61923_K168	G-6599_DMSO_30min	-0.29663	0.405977	-0.730657	16.9941	0.474942	0.863091
COPZ1_HUMAN	P61923	Coatomer subunit zeta-1	COPZ1	COPZ1_HUMAN|P61923_K29	G-6599_DMSO_30min	0.0788598	0.360323	0.218859	17.2054	0.829335	0.9692
COPZ1_HUMAN	P61923	Coatomer subunit zeta-1	COPZ1	COPZ1_HUMAN|P61923_K46	G-6599_DMSO_30min	-0.554482	0.263631	-2.10325	18.0947	0.0496953	0.580657
COPZ1_HUMAN	P61923	Coatomer subunit zeta-1	COPZ1	COPZ1_HUMAN|P61923_K46_K51	G-6599_DMSO_30min	-0.408918	0.234416	-1.74442	18.619	0.0975722	0.636286
COPZ1_HUMAN	P61923	Coatomer subunit zeta-1	COPZ1	COPZ1_HUMAN|P61923_K39	G-6599_DMSO_30min	-0.512844	0.290305	-1.76657	17.7545	0.0944866	0.636141
COR1C_HUMAN	Q9ULV4	Coronin-1C	CORO1C	COR1C_HUMAN|Q9ULV4_K471	G-6599_DMSO_30min	-0.311125	0.406784	-0.764842	18.8927	0.453814	0.853715
COR1C_HUMAN	Q9ULV4	Coronin-1C	CORO1C	COR1C_HUMAN|Q9ULV4_K337	G-6599_DMSO_30min	-0.422965	0.28675	-1.47503	21.9204	0.154425	0.685018
COR2B_HUMAN	Q9UQ03	Coronin-2B	CORO2B	COR2B_HUMAN|Q9UQ03_K221	G-6599_DMSO_30min	-0.351657	0.264394	-1.33005	18.5472	0.199628	0.71763
COT1_HUMAN	P10589	COUP transcription factor 1	NR2F1	COT1_HUMAN|P10589_K308	G-6599_DMSO_30min	-0.098484	0.308353	-0.319388	18.1813	0.753073	0.953977
COT2_HUMAN	P24468	COUP transcription factor 2	NR2F2	COT2_HUMAN|P24468_K85	G-6599_DMSO_30min	-0.462724	0.261698	-1.76816	19.7463	0.0924822	0.635772
COTL1_HUMAN	Q14019	Coactosin-like protein	COTL1	COTL1_HUMAN|Q14019_K75	G-6599_DMSO_30min	-0.346079	0.46416	-0.745602	17.9099	0.465581	0.858835
COX6C_HUMAN	P09669	Cytochrome c oxidase subunit 6C	COX6C	COX6C_HUMAN|P09669_K67	G-6599_DMSO_30min	-0.160261	0.246372	-0.650481	26.3358	0.521017	0.884199
CP131_HUMAN	Q9UPN4	Centrosomal protein of 131 kDa	CEP131	CP131_HUMAN|Q9UPN4_K510	G-6599_DMSO_30min	-0.521139	0.466056	-1.11819	17.5257	0.27858	0.77715
CP131_HUMAN	Q9UPN4	Centrosomal protein of 131 kDa	CEP131	CP131_HUMAN|Q9UPN4_K678	G-6599_DMSO_30min	-0.692942	0.277463	-2.49742	20.1148	0.0212958	0.529953
CP131_HUMAN	Q9UPN4	Centrosomal protein of 131 kDa	CEP131	CP131_HUMAN|Q9UPN4_K656	G-6599_DMSO_30min	-0.585708	0.304952	-1.92066	19.397	0.0695984	0.596256
CP250_HUMAN	Q9BV73	Centrosome-associated protein CEP250	CEP250	CP250_HUMAN|Q9BV73_K1148	G-6599_DMSO_30min	-0.521685	0.438191	-1.19054	19.291	0.248277	0.757307
CP2U1_HUMAN	Q7Z449	Cytochrome P450 2U1	CYP2U1	CP2U1_HUMAN|Q7Z449_K204	G-6599_DMSO_30min	-0.22554	0.284565	-0.792577	18.8309	0.437896	0.846182
CP2U1_HUMAN	Q7Z449	Cytochrome P450 2U1	CYP2U1	CP2U1_HUMAN|Q7Z449_K161	G-6599_DMSO_30min	-0.251781	0.287397	-0.876074	18.7766	0.39206	0.824931
CP51A_HUMAN	Q16850	Lanosterol 14-alpha demethylase	CYP51A1	CP51A_HUMAN|Q16850_K213	G-6599_DMSO_30min	-0.368932	0.789578	-0.467252	16.734	0.646346	0.923265
CP51A_HUMAN	Q16850	Lanosterol 14-alpha demethylase	CYP51A1	CP51A_HUMAN|Q16850_K336	G-6599_DMSO_30min	-0.205064	0.294655	-0.695945	20.1597	0.494409	0.870307
CP51A_HUMAN	Q16850	Lanosterol 14-alpha demethylase	CYP51A1	CP51A_HUMAN|Q16850_K436	G-6599_DMSO_30min	-0.0956603	0.464371	-0.206	17.7252	0.839139	0.972848
CP51A_HUMAN	Q16850	Lanosterol 14-alpha demethylase	CYP51A1	CP51A_HUMAN|Q16850_K156	G-6599_DMSO_30min	-0.138803	0.279496	-0.496618	20.6394	0.624706	0.915696
CP51A_HUMAN	Q16850	Lanosterol 14-alpha demethylase	CYP51A1	CP51A_HUMAN|Q16850_K141	G-6599_DMSO_30min	-0.359881	0.273264	-1.31697	20.8624	0.202131	0.718566
CP51A_HUMAN	Q16850	Lanosterol 14-alpha demethylase	CYP51A1	CP51A_HUMAN|Q16850_K358	G-6599_DMSO_30min	0.14838	0.437725	0.338981	17.9213	0.738564	0.951555
CPIN1_HUMAN	Q6FI81	Anamorsin	CIAPIN1	CPIN1_HUMAN|Q6FI81_K241	G-6599_DMSO_30min	-0.620814	0.245344	-2.53038	17.9872	0.0209479	0.529953
CPIN1_HUMAN	Q6FI81	Anamorsin	CIAPIN1	CPIN1_HUMAN|Q6FI81_K26	G-6599_DMSO_30min	-0.224162	0.331829	-0.675537	17.1704	0.508331	0.875876
CPNE2_HUMAN	Q96FN4	Copine-2	CPNE2	CPNE2_HUMAN|Q96FN4_K174	G-6599_DMSO_30min	0.320154	0.449398	0.712406	16.9258	0.485919	0.867613
CPNE2_HUMAN	Q96FN4	Copine-2	CPNE2	CPNE2_HUMAN|Q96FN4_K92	G-6599_DMSO_30min	-0.015494	0.293946	-0.0527103	17.8983	0.958547	0.994244
CPNE3_HUMAN	O75131	Copine-3	CPNE3	CPNE3_HUMAN|O75131_K158	G-6599_DMSO_30min	0.124189	0.418617	0.296664	17.6734	0.770181	0.959236
CPNE3_HUMAN	O75131	Copine-3	CPNE3	CPNE3_HUMAN|O75131_K76	G-6599_DMSO_30min	0.0143066	0.341011	0.0419536	18.448	0.966986	0.995716
CPNE3_HUMAN	O75131	Copine-3	CPNE3	CPNE3_HUMAN|O75131_K262	G-6599_DMSO_30min	-0.44425	0.313149	-1.41865	18.8879	0.172291	0.699019
CPNE3_HUMAN	O75131	Copine-3	CPNE3	CPNE3_HUMAN|O75131_K235	G-6599_DMSO_30min	-0.288628	0.394502	-0.731627	17.8632	0.473886	0.863091
CPNE3_HUMAN	O75131	Copine-3	CPNE3	CPNE3_HUMAN|O75131_K533	G-6599_DMSO_30min	-0.0450952	0.407855	-0.110567	17.7537	0.9132	0.989626
CPNE3_HUMAN	O75131	Copine-3	CPNE3	CPNE3_HUMAN|O75131_K390	G-6599_DMSO_30min	-0.440508	0.261397	-1.6852	20.1516	0.107374	0.645285
CPNE3_HUMAN	O75131	Copine-3	CPNE3	CPNE3_HUMAN|O75131_K528	G-6599_DMSO_30min	0.427967	0.415446	1.03014	17.6964	0.316819	0.796127
CPNS1_HUMAN	P04632	Calpain small subunit 1	CAPNS1	CPNS1_HUMAN|P04632_K135	G-6599_DMSO_30min	-0.390172	0.303207	-1.28682	18.4509	0.214069	0.730681
CPSF1_HUMAN	Q10570	Cleavage and polyadenylation specificity factor subunit 1	CPSF1	CPSF1_HUMAN|Q10570_K99	G-6599_DMSO_30min	-0.221009	0.23597	-0.936599	18.789	0.360849	0.81758
CPSF1_HUMAN	Q10570	Cleavage and polyadenylation specificity factor subunit 1	CPSF1	CPSF1_HUMAN|Q10570_K60	G-6599_DMSO_30min	-0.535321	0.237649	-2.25257	18.7507	0.0364706	0.553837
CPSF1_HUMAN	Q10570	Cleavage and polyadenylation specificity factor subunit 1	CPSF1	CPSF1_HUMAN|Q10570_K395	G-6599_DMSO_30min	-0.282919	0.281919	-1.00355	17.988	0.328906	0.802715
CPSF2_HUMAN	Q9P2I0	Cleavage and polyadenylation specificity factor subunit 2	CPSF2	CPSF2_HUMAN|Q9P2I0_K138	G-6599_DMSO_30min	-0.434743	0.268627	-1.61839	20.7913	0.12065	0.662325
CPSF2_HUMAN	Q9P2I0	Cleavage and polyadenylation specificity factor subunit 2	CPSF2	CPSF2_HUMAN|Q9P2I0_K92	G-6599_DMSO_30min	-0.227489	0.372328	-0.610992	18.489	0.548643	0.888969
CPSF2_HUMAN	Q9P2I0	Cleavage and polyadenylation specificity factor subunit 2	CPSF2	CPSF2_HUMAN|Q9P2I0_K324	G-6599_DMSO_30min	-0.227328	0.310652	-0.731776	19.5558	0.472984	0.863091
CPSF2_HUMAN	Q9P2I0	Cleavage and polyadenylation specificity factor subunit 2	CPSF2	CPSF2_HUMAN|Q9P2I0_K611	G-6599_DMSO_30min	-0.102018	0.273032	-0.373648	20.6319	0.712478	0.944082
CPSF2_HUMAN	Q9P2I0	Cleavage and polyadenylation specificity factor subunit 2	CPSF2	CPSF2_HUMAN|Q9P2I0_K622	G-6599_DMSO_30min	-0.518356	0.26027	-1.99161	21.1186	0.0595045	0.595573
CPSF2_HUMAN	Q9P2I0	Cleavage and polyadenylation specificity factor subunit 2	CPSF2	CPSF2_HUMAN|Q9P2I0_K375	G-6599_DMSO_30min	-0.148201	0.380581	-0.389408	18.3867	0.701448	0.94014
CPSF5_HUMAN	O43809	Cleavage and polyadenylation specificity factor subunit 5	NUDT21	CPSF5_HUMAN|O43809_K189	G-6599_DMSO_30min	-1.1784	0.382304	-3.08235	19.4991	0.00599969	0.461583
CPSF5_HUMAN	O43809	Cleavage and polyadenylation specificity factor subunit 5	NUDT21	CPSF5_HUMAN|O43809_K29	G-6599_DMSO_30min	-0.872006	0.305037	-2.85869	21.578	0.00924152	0.462987
CPSF5_HUMAN	O43809	Cleavage and polyadenylation specificity factor subunit 5	NUDT21	CPSF5_HUMAN|O43809_K182	G-6599_DMSO_30min	-1.0347	0.609926	-1.69644	17.4522	0.107566	0.645817
CPSF6_HUMAN	Q16630	Cleavage and polyadenylation specificity factor subunit 6	CPSF6	CPSF6_HUMAN|Q16630_K173	G-6599_DMSO_30min	-1.02782	0.429985	-2.39035	19.4167	0.0271067	0.545928
CPSF6_HUMAN	Q16630	Cleavage and polyadenylation specificity factor subunit 6	CPSF6	CPSF6_HUMAN|Q16630_K185	G-6599_DMSO_30min	-1.62517	0.525772	-3.09101	18.3067	0.00620972	0.461649
CPSF6_HUMAN	Q16630	Cleavage and polyadenylation specificity factor subunit 6	CPSF6	CPSF6_HUMAN|Q16630_K483	G-6599_DMSO_30min	-1.23059	0.458837	-2.68198	19.0025	0.0147499	0.509558
CPSF6_HUMAN	Q16630	Cleavage and polyadenylation specificity factor subunit 6	CPSF6	CPSF6_HUMAN|Q16630_K79	G-6599_DMSO_30min	-1.43556	0.443579	-3.23632	19.2106	0.00429941	0.379862
CR032_HUMAN	Q8TCD1	UPF0729 protein C18orf32	C18orf32	CR032_HUMAN|Q8TCD1_K39	G-6599_DMSO_30min	0.262918	0.795424	0.330538	17.0024	0.745032	0.953513
CREB1_HUMAN	P16220	Cyclic AMP-responsive element-binding protein 1	CREB1	CREB1_HUMAN|P16220_K316	G-6599_DMSO_30min	-0.313692	0.346434	-0.905488	28.45	0.372812	0.822672
CREB1_HUMAN	P16220	Cyclic AMP-responsive element-binding protein 1	CREB1	CREB1_HUMAN|P16220_K319	G-6599_DMSO_30min	-0.374392	0.308377	-1.21407	30.9696	0.233898	0.744791
CREB5_HUMAN	Q02930	Cyclic AMP-responsive element-binding protein 5	CREB5	CREB5_HUMAN|Q02930_K432	G-6599_DMSO_30min	-0.192223	0.269203	-0.714045	19.8769	0.483501	0.866642
CRIM1_HUMAN	Q9NZV1	Cysteine-rich motor neuron 1 protein	CRIM1	CRIM1_HUMAN|Q9NZV1_K1023	G-6599_DMSO_30min	-0.38807	0.282048	-1.3759	23.0476	0.182077	0.7048
CRIM1_HUMAN	Q9NZV1	Cysteine-rich motor neuron 1 protein	CRIM1	CRIM1_HUMAN|Q9NZV1_K978	G-6599_DMSO_30min	-0.453317	0.256325	-1.76852	24.6385	0.0893548	0.629957
CRKL_HUMAN	P46109	Crk-like protein	CRKL	CRKL_HUMAN|P46109_K145	G-6599_DMSO_30min	-0.330937	0.431356	-0.767201	17.9716	0.452924	0.853715
CRTAP_HUMAN	O75718	Cartilage-associated protein	CRTAP	CRTAP_HUMAN|O75718_K329	G-6599_DMSO_30min	-1.33595	0.422406	-3.16272	17.8536	0.0054272	0.437604
CRY1_HUMAN	Q16526	Cryptochrome-1	CRY1	CRY1_HUMAN|Q16526_K442	G-6599_DMSO_30min	0.159224	0.289639	0.549731	21.8466	0.58808	0.904609
CSDE1_HUMAN	O75534	Cold shock domain-containing protein E1	CSDE1	CSDE1_HUMAN|O75534_K758	G-6599_DMSO_30min	-0.323064	0.318761	-1.0135	17.5888	0.324561	0.800192
CSDE1_HUMAN	O75534	Cold shock domain-containing protein E1	CSDE1	CSDE1_HUMAN|O75534_K180	G-6599_DMSO_30min	-0.857495	0.329033	-2.60611	17.5024	0.0181466	0.520477
CSDE1_HUMAN	O75534	Cold shock domain-containing protein E1	CSDE1	CSDE1_HUMAN|O75534_K81	G-6599_DMSO_30min	-0.782956	0.310634	-2.52051	17.6636	0.0215782	0.529953
CSDE1_HUMAN	O75534	Cold shock domain-containing protein E1	CSDE1	CSDE1_HUMAN|O75534_K277	G-6599_DMSO_30min	-0.338095	0.246329	-1.37254	18.5618	0.186255	0.706959
CSDE1_HUMAN	O75534	Cold shock domain-containing protein E1	CSDE1	CSDE1_HUMAN|O75534_K91	G-6599_DMSO_30min	0.19991	0.745536	0.268143	16.4717	0.791918	0.962965
CSDE1_HUMAN	O75534	Cold shock domain-containing protein E1	CSDE1	CSDE1_HUMAN|O75534_K307	G-6599_DMSO_30min	-0.41015	0.28789	-1.42468	17.9097	0.171444	0.699019
CSDE1_HUMAN	O75534	Cold shock domain-containing protein E1	CSDE1	CSDE1_HUMAN|O75534_K166	G-6599_DMSO_30min	-0.773322	0.288215	-2.68315	17.9058	0.0152325	0.509558
CSDE1_HUMAN	O75534	Cold shock domain-containing protein E1	CSDE1	CSDE1_HUMAN|O75534_K682	G-6599_DMSO_30min	-0.117709	0.504652	-0.233248	16.7605	0.818393	0.967371
CSDE1_HUMAN	O75534	Cold shock domain-containing protein E1	CSDE1	CSDE1_HUMAN|O75534_K288	G-6599_DMSO_30min	-0.166693	0.25752	-0.647298	18.3527	0.525454	0.885585
CSK_HUMAN	P41240	Tyrosine-protein kinase CSK	CSK	CSK_HUMAN|P41240_K196	G-6599_DMSO_30min	-0.523664	0.267519	-1.95748	18.693	0.0653914	0.595573
CSK21_HUMAN	P68400	Casein kinase II subunit alpha	CSNK2A1	CSK21_HUMAN|P68400_K64	G-6599_DMSO_30min	0.908401	0.844438	1.07575	17.2614	0.296848	0.789655
CSK2B_HUMAN	P67870	Casein kinase II subunit beta	CSNK2B	CSK2B_HUMAN|P67870_K147	G-6599_DMSO_30min	0.104076	0.321131	0.324093	27.8933	0.748286	0.953513
CSK2B_HUMAN	P67870	Casein kinase II subunit beta	CSNK2B	CSK2B_HUMAN|P67870_K208	G-6599_DMSO_30min	-0.0121721	0.456412	-0.0266691	21.7087	0.978967	0.997104
CSK2B_HUMAN	P67870	Casein kinase II subunit beta	CSNK2B	CSK2B_HUMAN|P67870_K191	G-6599_DMSO_30min	-0.559201	0.630903	-0.88635	18.9426	0.386543	0.824931
CSK2B_HUMAN	P67870	Casein kinase II subunit beta	CSNK2B	CSK2B_HUMAN|P67870_K100	G-6599_DMSO_30min	-0.0611133	0.39636	-0.154187	23.7074	0.878768	0.983222
CSKI1_HUMAN	Q8WXD9	Caskin-1	CASKIN1	CSKI1_HUMAN|Q8WXD9_K518	G-6599_DMSO_30min	-0.777227	0.36823	-2.11071	17.6745	0.0493197	0.578287
CSKP_HUMAN	O14936	Peripheral plasma membrane protein CASK	CASK	CSKP_HUMAN|O14936_K825	G-6599_DMSO_30min	0.332837	1.03147	0.322681	16.4693	0.750997	0.953836
CSKP_HUMAN	O14936	Peripheral plasma membrane protein CASK	CASK	CSKP_HUMAN|O14936_K554	G-6599_DMSO_30min	-0.291285	0.559915	-0.520231	17.0529	0.609591	0.909948
CSKP_HUMAN	O14936	Peripheral plasma membrane protein CASK	CASK	CSKP_HUMAN|O14936_K159	G-6599_DMSO_30min	0.49145	2.00227	0.245446	14.2864	0.809602	0.966437
CSKP_HUMAN	O14936	Peripheral plasma membrane protein CASK	CASK	CSKP_HUMAN|O14936_K756	G-6599_DMSO_30min	0.479985	0.779917	0.615431	16.6498	0.546591	0.888969
CSKP_HUMAN	O14936	Peripheral plasma membrane protein CASK	CASK	CSKP_HUMAN|O14936_K762	G-6599_DMSO_30min	-0.1512	0.250117	-0.604516	20.7208	0.552064	0.889965
CSN1_HUMAN	Q13098	COP9 signalosome complex subunit 1	GPS1	CSN1_HUMAN|Q13098_K438	G-6599_DMSO_30min	-0.12809	0.272334	-0.47034	23.8484	0.642385	0.922083
CSN1_HUMAN	Q13098	COP9 signalosome complex subunit 1	GPS1	CSN1_HUMAN|Q13098_K153	G-6599_DMSO_30min	-0.354761	0.291229	-1.21815	22.8023	0.235622	0.746729
CSN1_HUMAN	Q13098	COP9 signalosome complex subunit 1	GPS1	CSN1_HUMAN|Q13098_K422	G-6599_DMSO_30min	-0.281415	0.26777	-1.05096	24.1358	0.303688	0.793256
CSN1_HUMAN	Q13098	COP9 signalosome complex subunit 1	GPS1	CSN1_HUMAN|Q13098_K248	G-6599_DMSO_30min	-0.192169	0.273831	-0.701781	23.7573	0.489635	0.868611
CSN1_HUMAN	Q13098	COP9 signalosome complex subunit 1	GPS1	CSN1_HUMAN|Q13098_K224	G-6599_DMSO_30min	-0.219338	0.44409	-0.493904	18.8535	0.627079	0.916538
CSN2_HUMAN	P61201	COP9 signalosome complex subunit 2	COPS2	CSN2_HUMAN|P61201_K415	G-6599_DMSO_30min	-0.150438	0.40813	-0.368603	22.1061	0.71593	0.944923
CSN2_HUMAN	P61201	COP9 signalosome complex subunit 2	COPS2	CSN2_HUMAN|P61201_K441	G-6599_DMSO_30min	-0.744369	0.376286	-1.9782	23.2595	0.0598689	0.595573
CSN2_HUMAN	P61201	COP9 signalosome complex subunit 2	COPS2	CSN2_HUMAN|P61201_K110	G-6599_DMSO_30min	-0.504151	0.331262	-1.52191	25.5098	0.140332	0.673346
CSN2_HUMAN	P61201	COP9 signalosome complex subunit 2	COPS2	CSN2_HUMAN|P61201_K426	G-6599_DMSO_30min	-0.39542	0.328365	-1.20421	25.6854	0.239488	0.749023
CSN3_HUMAN	Q9UNS2	COP9 signalosome complex subunit 3	COPS3	CSN3_HUMAN|Q9UNS2_K125	G-6599_DMSO_30min	-0.0646611	0.225807	-0.286356	18.812	0.777735	0.95959
CSN3_HUMAN	Q9UNS2	COP9 signalosome complex subunit 3	COPS3	CSN3_HUMAN|Q9UNS2_K391	G-6599_DMSO_30min	-0.278005	0.311594	-0.892204	17.5438	0.384358	0.824931
CSN3_HUMAN	Q9UNS2	COP9 signalosome complex subunit 3	COPS3	CSN3_HUMAN|Q9UNS2_K254	G-6599_DMSO_30min	0.0454791	0.351802	0.129275	17.2527	0.898635	0.987755
CSN3_HUMAN	Q9UNS2	COP9 signalosome complex subunit 3	COPS3	CSN3_HUMAN|Q9UNS2_K30	G-6599_DMSO_30min	-0.0380727	0.47155	-0.0807395	16.7925	0.936604	0.991158
CSN3_HUMAN	Q9UNS2	COP9 signalosome complex subunit 3	COPS3	CSN3_HUMAN|Q9UNS2_K382	G-6599_DMSO_30min	0.00873414	0.360293	0.0242417	17.2038	0.980939	0.997244
CSN3_HUMAN	Q9UNS2	COP9 signalosome complex subunit 3	COPS3	CSN3_HUMAN|Q9UNS2_K304	G-6599_DMSO_30min	-0.196955	0.241556	-0.81536	18.4677	0.425257	0.839374
CSN3_HUMAN	Q9UNS2	COP9 signalosome complex subunit 3	COPS3	CSN3_HUMAN|Q9UNS2_K312	G-6599_DMSO_30min	-0.0619861	0.307111	-0.201836	17.5838	0.842361	0.973593
CSN3_HUMAN	Q9UNS2	COP9 signalosome complex subunit 3	COPS3	CSN3_HUMAN|Q9UNS2_K406	G-6599_DMSO_30min	0.0371861	0.342369	0.108614	17.3116	0.914757	0.989723
CSN5_HUMAN	Q92905	COP9 signalosome complex subunit 5	COPS5	CSN5_HUMAN|Q92905_K219	G-6599_DMSO_30min	0.196283	0.360284	0.5448	18.925	0.592254	0.905892
CSN5_HUMAN	Q92905	COP9 signalosome complex subunit 5	COPS5	CSN5_HUMAN|Q92905_K56	G-6599_DMSO_30min	-0.216237	0.248067	-0.871691	22.2988	0.392666	0.824931
CSN5_HUMAN	Q92905	COP9 signalosome complex subunit 5	COPS5	CSN5_HUMAN|Q92905_K33	G-6599_DMSO_30min	-0.18496	0.378296	-0.488929	18.6592	0.63059	0.91814
CSN6_HUMAN	Q7L5N1	COP9 signalosome complex subunit 6	COPS6	CSN6_HUMAN|Q7L5N1_K102	G-6599_DMSO_30min	0.338235	0.375203	0.901473	19.2983	0.37845	0.823239
CSN6_HUMAN	Q7L5N1	COP9 signalosome complex subunit 6	COPS6	CSN6_HUMAN|Q7L5N1_K274	G-6599_DMSO_30min	0.11821	0.303822	0.389077	21.0825	0.701121	0.940086
CSN6_HUMAN	Q7L5N1	COP9 signalosome complex subunit 6	COPS6	CSN6_HUMAN|Q7L5N1_K236	G-6599_DMSO_30min	-0.0597808	0.248956	-0.240126	23.7553	0.812292	0.966647
CSN6_HUMAN	Q7L5N1	COP9 signalosome complex subunit 6	COPS6	CSN6_HUMAN|Q7L5N1_K113	G-6599_DMSO_30min	0.216214	0.233814	0.924729	24.8602	0.363997	0.818859
CSN6_HUMAN	Q7L5N1	COP9 signalosome complex subunit 6	COPS6	CSN6_HUMAN|Q7L5N1_K243	G-6599_DMSO_30min	-0.0626372	0.349217	-0.179365	19.8119	0.859473	0.97617
CSN7A_HUMAN	Q9UBW8	COP9 signalosome complex subunit 7a	COPS7A	CSN7A_HUMAN|Q9UBW8_K269	G-6599_DMSO_30min	-1.08889	0.339548	-3.20689	18.0415	0.004877	0.412044
CSN7A_HUMAN	Q9UBW8	COP9 signalosome complex subunit 7a	COPS7A	CSN7A_HUMAN|Q9UBW8_K206	G-6599_DMSO_30min	-0.145333	0.294791	-0.493004	18.6708	0.627758	0.916948
CSN7A_HUMAN	Q9UBW8	COP9 signalosome complex subunit 7a	COPS7A	CSN7A_HUMAN|Q9UBW8_K199	G-6599_DMSO_30min	-0.206152	0.234015	-0.880932	20.2396	0.388696	0.824931
CSN7A_HUMAN	Q9UBW8	COP9 signalosome complex subunit 7a	COPS7A	CSN7A_HUMAN|Q9UBW8_K20	G-6599_DMSO_30min	-0.362424	0.24803	-1.46121	19.7642	0.159675	0.69168
CSN7B_HUMAN	Q9H9Q2	COP9 signalosome complex subunit 7b	COPS7B	CSN7B_HUMAN|Q9H9Q2_K165	G-6599_DMSO_30min	0.125495	0.303875	0.412983	18.2983	0.684418	0.936458
CSN7B_HUMAN	Q9H9Q2	COP9 signalosome complex subunit 7b	COPS7B	CSN7B_HUMAN|Q9H9Q2_K109	G-6599_DMSO_30min	-0.161135	0.279789	-0.575916	18.6932	0.571541	0.896191
CSN7B_HUMAN	Q9H9Q2	COP9 signalosome complex subunit 7b	COPS7B	CSN7B_HUMAN|Q9H9Q2_K221	G-6599_DMSO_30min	-0.365967	0.444956	-0.822479	17.1669	0.422082	0.837398
CSN8_HUMAN	Q99627	COP9 signalosome complex subunit 8	COPS8	CSN8_HUMAN|Q99627_K178	G-6599_DMSO_30min	-0.588588	0.52916	-1.11231	17.3588	0.281174	0.778338
CSPG5_HUMAN	O95196	Chondroitin sulfate proteoglycan 5	CSPG5	CSPG5_HUMAN|O95196_K527	G-6599_DMSO_30min	-0.524852	0.285405	-1.83898	20.8867	0.0801801	0.619603
CSTF2_HUMAN	P33240	Cleavage stimulation factor subunit 2	CSTF2	CSTF2_HUMAN|P33240_K145	G-6599_DMSO_30min	-0.387201	0.357737	-1.08236	18.1313	0.293277	0.788015
CSTF2_HUMAN	P33240	Cleavage stimulation factor subunit 2	CSTF2	CSTF2_HUMAN|P33240_K567	G-6599_DMSO_30min	-0.377174	0.294944	-1.2788	19.0924	0.216294	0.73174
CSTF2_HUMAN	P33240	Cleavage stimulation factor subunit 2	CSTF2	CSTF2_HUMAN|P33240_K189	G-6599_DMSO_30min	-0.524279	0.278117	-1.8851	19.4771	0.0744251	0.611363
CSTF3_HUMAN	Q12996	Cleavage stimulation factor subunit 3	CSTF3	CSTF3_HUMAN|Q12996_K94	G-6599_DMSO_30min	0.0719111	0.258324	0.278375	18.8228	0.783759	0.961941
CSTF3_HUMAN	Q12996	Cleavage stimulation factor subunit 3	CSTF3	CSTF3_HUMAN|Q12996_K682	G-6599_DMSO_30min	-0.343782	0.294759	-1.16631	18.1912	0.258551	0.760008
CSTFT_HUMAN	Q9H0L4	Cleavage stimulation factor subunit 2 tau variant	CSTF2T	CSTFT_HUMAN|Q9H0L4_K189	G-6599_DMSO_30min	-0.504969	0.263706	-1.91489	18.9522	0.0707233	0.597508
CSTFT_HUMAN	Q9H0L4	Cleavage stimulation factor subunit 2 tau variant	CSTF2T	CSTFT_HUMAN|Q9H0L4_K148	G-6599_DMSO_30min	-0.637807	0.297753	-2.14207	18.3339	0.0458517	0.570583
CTBL1_HUMAN	Q8WYA6	Beta-catenin-like protein 1	CTNNBL1	CTBL1_HUMAN|Q8WYA6_K91	G-6599_DMSO_30min	-0.0127587	0.336083	-0.037963	17.6968	0.970142	0.996087
CTBL1_HUMAN	Q8WYA6	Beta-catenin-like protein 1	CTNNBL1	CTBL1_HUMAN|Q8WYA6_K332	G-6599_DMSO_30min	-0.128926	0.356373	-0.361772	17.5288	0.721846	0.946728
CTBP1_HUMAN	Q13363	C-terminal-binding protein 1	CTBP1	CTBP1_HUMAN|Q13363_K46	G-6599_DMSO_30min	-0.682545	0.523062	-1.3049	16.8325	0.209485	0.726559
CTBP1_HUMAN	Q13363	C-terminal-binding protein 1	CTBP1	CTBP1_HUMAN|Q13363_K273	G-6599_DMSO_30min	-0.459142	0.300233	-1.52929	18.121	0.143462	0.675564
CTCF_HUMAN	P49711	Transcriptional repressor CTCF	CTCF	CTCF_HUMAN|P49711_K543	G-6599_DMSO_30min	-0.545112	0.26616	-2.04806	20.5402	0.053553	0.588128
CTDP1_HUMAN	Q9Y5B0	RNA polymerase II subunit A C-terminal domain phosphatase	CTDP1	CTDP1_HUMAN|Q9Y5B0_K624	G-6599_DMSO_30min	-0.237643	0.271482	-0.875355	18.2062	0.392783	0.824931
CTDS2_HUMAN	O14595	Carboxy-terminal domain RNA polymerase II polypeptide A small phosphatase 2	CTDSP2	CTDS2_HUMAN|O14595_K20	G-6599_DMSO_30min	-0.349869	0.297094	-1.17764	22.4543	0.251273	0.757526
CTF8_HUMAN	P0CG13	Chromosome transmission fidelity protein 8 homolog	CHTF8	CTF8_HUMAN|P0CG13_K101	G-6599_DMSO_30min	0.0976417	0.28841	0.338552	23.2751	0.737983	0.951172
CTL1_HUMAN	Q8WWI5	Choline transporter-like protein 1	SLC44A1	CTL1_HUMAN|Q8WWI5_K648	G-6599_DMSO_30min	-0.0579709	0.666892	-0.086927	16.8901	0.931752	0.991061
CTNA1_HUMAN	P35221	Catenin alpha-1	CTNNA1	CTNA1_HUMAN|P35221_K695	G-6599_DMSO_30min	-0.193887	0.308536	-0.628412	17.5655	0.53782	0.886177
CTNA1_HUMAN	P35221	Catenin alpha-1	CTNNA1	CTNA1_HUMAN|P35221_K681	G-6599_DMSO_30min	-0.200505	0.24588	-0.815458	18.3766	0.425254	0.839374
CTNA1_HUMAN	P35221	Catenin alpha-1	CTNNA1	CTNA1_HUMAN|P35221_K842	G-6599_DMSO_30min	-0.446571	0.244712	-1.82488	18.3983	0.0842999	0.625206
CTNA1_HUMAN	P35221	Catenin alpha-1	CTNNA1	CTNA1_HUMAN|P35221_K834	G-6599_DMSO_30min	-0.25212	0.284533	-0.886083	17.8103	0.387381	0.824931
CTNA1_HUMAN	P35221	Catenin alpha-1	CTNNA1	CTNA1_HUMAN|P35221_K45	G-6599_DMSO_30min	-0.423239	0.285792	-1.48093	17.7959	0.156113	0.685018
CTNA1_HUMAN	P35221	Catenin alpha-1	CTNNA1	CTNA1_HUMAN|P35221_K81	G-6599_DMSO_30min	-0.56043	0.267042	-2.09865	18.0344	0.0501944	0.582559
CTNA1_HUMAN	P35221	Catenin alpha-1	CTNNA1	CTNA1_HUMAN|P35221_K747	G-6599_DMSO_30min	-0.222137	0.246888	-0.89975	18.3581	0.379904	0.824357
CTNA1_HUMAN	P35221	Catenin alpha-1	CTNNA1	CTNA1_HUMAN|P35221_K845	G-6599_DMSO_30min	-0.414671	0.312992	-1.32486	17.5264	0.202232	0.718566
CTNA1_HUMAN	P35221	Catenin alpha-1	CTNNA1	CTNA1_HUMAN|P35221_K216	G-6599_DMSO_30min	-0.370782	0.257862	-1.43791	18.1719	0.16746	0.694874
CTNA1_HUMAN	P35221	Catenin alpha-1	CTNNA1	CTNA1_HUMAN|P35221_K199	G-6599_DMSO_30min	-0.499297	0.251311	-1.98677	18.2799	0.0621468	0.595573
CTNA1_HUMAN	P35221	Catenin alpha-1	CTNNA1	CTNA1_HUMAN|P35221_K448	G-6599_DMSO_30min	-0.0852431	0.547821	-0.155604	16.6437	0.878217	0.982915
CTNB1_HUMAN	P35222	Catenin beta-1	CTNNB1	CTNB1_HUMAN|P35222_K233	G-6599_DMSO_30min	-0.178263	0.286912	-0.621315	17.5141	0.542395	0.888363
CTNB1_HUMAN	P35222	Catenin beta-1	CTNNB1	CTNB1_HUMAN|P35222_K158	G-6599_DMSO_30min	-0.00241465	0.318933	-0.00757104	17.2623	0.994046	0.998234
CTNB1_HUMAN	P35222	Catenin beta-1	CTNNB1	CTNB1_HUMAN|P35222_K180	G-6599_DMSO_30min	-0.338476	0.264836	-1.27806	17.7463	0.217693	0.732981
CTNB1_HUMAN	P35222	Catenin beta-1	CTNNB1	CTNB1_HUMAN|P35222_K133	G-6599_DMSO_30min	-0.0256345	0.432769	-0.0592338	16.7837	0.953465	0.993946
CTND1_HUMAN	O60716	Catenin delta-1	CTNND1	CTND1_HUMAN|O60716_K710	G-6599_DMSO_30min	0.12696	0.764179	0.166139	17.0168	0.870006	0.97997
CTND1_HUMAN	O60716	Catenin delta-1	CTNND1	CTND1_HUMAN|O60716_K633	G-6599_DMSO_30min	-0.331924	0.267463	-1.24101	23.5521	0.226822	0.737384
CTND1_HUMAN	O60716	Catenin delta-1	CTNND1	CTND1_HUMAN|O60716_K517	G-6599_DMSO_30min	-0.102359	0.362672	-0.282236	19.9823	0.780665	0.960369
CTND1_HUMAN	O60716	Catenin delta-1	CTNND1	CTND1_HUMAN|O60716_K84	G-6599_DMSO_30min	-0.0435422	0.368155	-0.118271	19.8622	0.907041	0.988943
CTND1_HUMAN	O60716	Catenin delta-1	CTNND1	CTND1_HUMAN|O60716_K673	G-6599_DMSO_30min	-0.27049	0.290937	-0.929721	22.3124	0.362466	0.818607
CTND1_HUMAN	O60716	Catenin delta-1	CTNND1	CTND1_HUMAN|O60716_K408	G-6599_DMSO_30min	-0.326115	0.279719	-1.16587	22.8638	0.255687	0.759612
CTND1_HUMAN	O60716	Catenin delta-1	CTNND1	CTND1_HUMAN|O60716_K676	G-6599_DMSO_30min	0.0928587	0.419249	0.221488	18.9765	0.827078	0.968923
CTND1_HUMAN	O60716-3	Catenin delta-1 (isoform 3)	CTNND1	CTND1_HUMAN|O60716-3_K938	G-6599_DMSO_30min	-0.534999	0.289176	-1.85008	22.3945	0.0775416	0.618717
CTNL1_HUMAN	Q9UBT7	Alpha-catulin	CTNNAL1	CTNL1_HUMAN|Q9UBT7_K675	G-6599_DMSO_30min	-0.704651	0.265985	-2.64922	19.6944	0.0155202	0.509558
CTNL1_HUMAN	Q9UBT7	Alpha-catulin	CTNNAL1	CTNL1_HUMAN|Q9UBT7_K394	G-6599_DMSO_30min	3.82321	1.95813	1.95248	15.2862	0.0694431	0.596256
CTNL1_HUMAN	Q9UBT7	Alpha-catulin	CTNNAL1	CTNL1_HUMAN|Q9UBT7_K233	G-6599_DMSO_30min	-0.300319	0.265787	-1.12992	19.6999	0.272079	0.772136
CTNL1_HUMAN	Q9UBT7	Alpha-catulin	CTNNAL1	CTNL1_HUMAN|Q9UBT7_K681	G-6599_DMSO_30min	-0.464609	0.259158	-1.79276	19.8949	0.0882303	0.627641
CTNL1_HUMAN	Q9UBT7	Alpha-catulin	CTNNAL1	CTNL1_HUMAN|Q9UBT7_K544	G-6599_DMSO_30min	-0.609443	0.311108	-1.95894	18.7063	0.0651974	0.595573
CTNL1_HUMAN	Q9UBT7	Alpha-catulin	CTNNAL1	CTNL1_HUMAN|Q9UBT7_K541	G-6599_DMSO_30min	-0.437843	0.279581	-1.56606	19.3414	0.133549	0.667972
CTR9_HUMAN	Q6PD62	RNA polymerase-associated protein CTR9 homolog	CTR9	CTR9_HUMAN|Q6PD62_K187	G-6599_DMSO_30min	-0.39462	0.273595	-1.44235	19.2861	0.165247	0.69168
CTR9_HUMAN	Q6PD62	RNA polymerase-associated protein CTR9 homolog	CTR9	CTR9_HUMAN|Q6PD62_K737	G-6599_DMSO_30min	-0.249311	0.237759	-1.04859	20.3709	0.306651	0.793269
CTR9_HUMAN	Q6PD62	RNA polymerase-associated protein CTR9 homolog	CTR9	CTR9_HUMAN|Q6PD62_K544	G-6599_DMSO_30min	0.539779	0.875166	0.616773	16.509	0.545797	0.888903
CTR9_HUMAN	Q6PD62	RNA polymerase-associated protein CTR9 homolog	CTR9	CTR9_HUMAN|Q6PD62_K369	G-6599_DMSO_30min	-0.28408	0.228249	-1.24461	20.7571	0.227147	0.737615
CTR9_HUMAN	Q6PD62	RNA polymerase-associated protein CTR9 homolog	CTR9	CTR9_HUMAN|Q6PD62_K586	G-6599_DMSO_30min	-0.491341	0.293558	-1.67374	18.8587	0.110687	0.650599
CTR9_HUMAN	Q6PD62	RNA polymerase-associated protein CTR9 homolog	CTR9	CTR9_HUMAN|Q6PD62_K798	G-6599_DMSO_30min	-0.5241	0.226334	-2.31561	20.8414	0.0308599	0.545928
CTR9_HUMAN	Q6PD62	RNA polymerase-associated protein CTR9 homolog	CTR9	CTR9_HUMAN|Q6PD62_K660	G-6599_DMSO_30min	-0.428019	0.294506	-1.45335	18.8407	0.162582	0.69168
CTR9_HUMAN	Q6PD62	RNA polymerase-associated protein CTR9 homolog	CTR9	CTR9_HUMAN|Q6PD62_K283	G-6599_DMSO_30min	-0.623966	0.281306	-2.21811	19.1093	0.0388577	0.553837
CTRO_HUMAN	O14578	Citron Rho-interacting kinase	CIT	CTRO_HUMAN|O14578_K1108	G-6599_DMSO_30min	-0.342207	0.23628	-1.44831	19.1455	0.163711	0.69168
CTRO_HUMAN	O14578	Citron Rho-interacting kinase	CIT	CTRO_HUMAN|O14578_K1094	G-6599_DMSO_30min	-0.428054	0.243671	-1.75669	18.9596	0.0951098	0.636141
CTSL2_HUMAN	Q05D32	CTD small phosphatase-like protein 2	CTDSPL2	CTSL2_HUMAN|Q05D32_K57	G-6599_DMSO_30min	-0.541263	0.242556	-2.2315	21.1044	0.0366202	0.553837
CTSL2_HUMAN	Q05D32	CTD small phosphatase-like protein 2	CTDSPL2	CTSL2_HUMAN|Q05D32_K366	G-6599_DMSO_30min	-0.247172	0.260252	-0.949742	20.4083	0.353356	0.813758
CTSL2_HUMAN	Q05D32	CTD small phosphatase-like protein 2	CTDSPL2	CTSL2_HUMAN|Q05D32_K358	G-6599_DMSO_30min	-0.295884	0.405827	-0.729089	17.851	0.475405	0.863091
CUED1_HUMAN	Q9NWM3	CUE domain-containing protein 1	CUEDC1	CUED1_HUMAN|Q9NWM3_K272	G-6599_DMSO_30min	0.155623	0.522408	0.297895	16.9628	0.769401	0.958965
CUED1_HUMAN	Q9NWM3	CUE domain-containing protein 1	CUEDC1	CUED1_HUMAN|Q9NWM3_K270	G-6599_DMSO_30min	-0.378583	0.283136	-1.33711	18.8465	0.197104	0.714483
CUED2_HUMAN	Q9H467	CUE domain-containing protein 2	CUEDC2	CUED2_HUMAN|Q9H467_K213	G-6599_DMSO_30min	-0.241836	0.296346	-0.816059	19.313	0.424418	0.839173
CUED2_HUMAN	Q9H467	CUE domain-containing protein 2	CUEDC2	CUED2_HUMAN|Q9H467_K219	G-6599_DMSO_30min	-0.238678	0.404084	-0.590665	17.83	0.562158	0.893163
CUED2_HUMAN	Q9H467	CUE domain-containing protein 2	CUEDC2	CUED2_HUMAN|Q9H467_K256	G-6599_DMSO_30min	-0.131046	0.381744	-0.343282	18.032	0.735357	0.950156
CUL1_HUMAN	Q13616	Cullin-1	CUL1	CUL1_HUMAN|Q13616_K693	G-6599_DMSO_30min	-0.0100664	0.361898	-0.0278155	17.3807	0.978126	0.997104
CUL1_HUMAN	Q13616	Cullin-1	CUL1	CUL1_HUMAN|Q13616_K522	G-6599_DMSO_30min	-0.595741	0.267775	-2.22478	18.3865	0.0388382	0.553837
CUL1_HUMAN	Q13616	Cullin-1	CUL1	CUL1_HUMAN|Q13616_K410	G-6599_DMSO_30min	-0.272779	0.25326	-1.07707	18.6566	0.295179	0.789121
CUL2_HUMAN	Q13617	Cullin-2	CUL2	CUL2_HUMAN|Q13617_K615	G-6599_DMSO_30min	-0.281344	0.237216	-1.18603	20.0214	0.249496	0.757526
CUL2_HUMAN	Q13617	Cullin-2	CUL2	CUL2_HUMAN|Q13617_K652	G-6599_DMSO_30min	-0.365718	0.250002	-1.46286	19.6141	0.159346	0.69168
CUL2_HUMAN	Q13617	Cullin-2	CUL2	CUL2_HUMAN|Q13617_K62	G-6599_DMSO_30min	-0.0869184	0.237563	-0.365875	20.0094	0.718298	0.944983
CUL2_HUMAN	Q13617	Cullin-2	CUL2	CUL2_HUMAN|Q13617_K719	G-6599_DMSO_30min	-0.340994	0.333722	-1.02179	18.0612	0.320373	0.799008
CUL3_HUMAN	Q13618	Cullin-3	CUL3	CUL3_HUMAN|Q13618_K47	G-6599_DMSO_30min	0.19032	0.586695	0.324393	16.5867	0.749696	0.953836
CUL3_HUMAN	Q13618	Cullin-3	CUL3	CUL3_HUMAN|Q13618_K292	G-6599_DMSO_30min	-0.279352	0.337839	-0.826879	17.3259	0.419549	0.835197
CUL3_HUMAN	Q13618	Cullin-3	CUL3	CUL3_HUMAN|Q13618_K444	G-6599_DMSO_30min	-0.156123	0.300206	-0.520052	17.6289	0.609497	0.909948
CUL3_HUMAN	Q13618	Cullin-3	CUL3	CUL3_HUMAN|Q13618_K262	G-6599_DMSO_30min	-0.152355	0.310354	-0.490907	17.5357	0.629579	0.917816
CUL3_HUMAN	Q13618	Cullin-3	CUL3	CUL3_HUMAN|Q13618_K673	G-6599_DMSO_30min	-0.545902	0.231343	-2.35971	18.6465	0.0293601	0.545928
CUL3_HUMAN	Q13618	Cullin-3	CUL3	CUL3_HUMAN|Q13618_K742	G-6599_DMSO_30min	-0.474444	0.266932	-1.77739	18.0171	0.0923879	0.635772
CUL3_HUMAN	Q13618	Cullin-3	CUL3	CUL3_HUMAN|Q13618_K433	G-6599_DMSO_30min	-0.321634	0.220177	-1.4608	18.9147	0.160483	0.69168
CUL4A_HUMAN	Q13619	Cullin-4A	CUL4A	CUL4A_HUMAN|Q13619_K646	G-6599_DMSO_30min	-0.239323	0.275434	-0.868896	18.5332	0.396017	0.824931
CUL4A_HUMAN	Q13619	Cullin-4A	CUL4A	CUL4A_HUMAN|Q13619_K561	G-6599_DMSO_30min	-0.407197	0.215336	-1.89098	20.1354	0.0731034	0.605921
CUL4A_HUMAN	Q13619	Cullin-4A	CUL4A	CUL4A_HUMAN|Q13619_K661	G-6599_DMSO_30min	-0.0588827	0.249903	-0.235623	19.063	0.816238	0.966647
CUL4A_HUMAN	Q13619	Cullin-4A	CUL4A	CUL4A_HUMAN|Q13619_K668	G-6599_DMSO_30min	-0.225506	0.217076	-1.03883	20.0677	0.311239	0.795089
CUL4A_HUMAN	Q13619	Cullin-4A	CUL4A	CUL4A_HUMAN|Q13619_K465	G-6599_DMSO_30min	-0.278158	0.254727	-1.09199	18.9496	0.288529	0.783787
CUL4A_HUMAN	Q13619	Cullin-4A	CUL4A	CUL4A_HUMAN|Q13619_K480	G-6599_DMSO_30min	2.03755	1.05541	1.93058	14.361	0.0735221	0.608198
CUL4A_HUMAN	Q13619	Cullin-4A	CUL4A	CUL4A_HUMAN|Q13619_K454	G-6599_DMSO_30min	-0.150337	0.246615	-0.609602	19.1445	0.549293	0.888969
CUL4A_HUMAN	Q13619	Cullin-4A	CUL4A	CUL4A_HUMAN|Q13619_K473	G-6599_DMSO_30min	-0.0143201	0.370688	-0.0386312	17.4678	0.969623	0.996087
CUL5_HUMAN	Q93034	Cullin-5	CUL5	CUL5_HUMAN|Q93034_K232	G-6599_DMSO_30min	-0.307544	0.3073	-1.0008	18.1009	0.330118	0.803187
CUL5_HUMAN	Q93034	Cullin-5	CUL5	CUL5_HUMAN|Q93034_K397	G-6599_DMSO_30min	-0.653055	0.283136	-2.30651	18.4531	0.032874	0.545928
CUL5_HUMAN	Q93034	Cullin-5	CUL5	CUL5_HUMAN|Q93034_K529	G-6599_DMSO_30min	-0.0786318	0.468805	-0.167728	17.0114	0.868775	0.979828
CUL5_HUMAN	Q93034	Cullin-5	CUL5	CUL5_HUMAN|Q93034_K724	G-6599_DMSO_30min	-1.12024	0.425906	-2.63025	17.181	0.0174382	0.515646
CUL9_HUMAN	Q8IWT3	Cullin-9	CUL9	CUL9_HUMAN|Q8IWT3_K1881	G-6599_DMSO_30min	-0.578812	0.23625	-2.45	26.4133	0.0212132	0.529953
CUTA_HUMAN	O60888	Protein CutA	CUTA	CUTA_HUMAN|O60888_K124	G-6599_DMSO_30min	0.0471294	0.821954	0.0573383	16.8666	0.95495	0.994021
CUTA_HUMAN	O60888	Protein CutA	CUTA	CUTA_HUMAN|O60888_K112	G-6599_DMSO_30min	-0.276061	0.36953	-0.747059	19.5984	0.463897	0.85814
CX038_HUMAN	Q8TB03	Uncharacterized protein CXorf38	CXorf38	CX038_HUMAN|Q8TB03_K20	G-6599_DMSO_30min	-0.390962	0.317065	-1.23307	17.7914	0.233596	0.744791
CXG1_HUMAN	P36383	Gap junction gamma-1 protein	GJC1	CXG1_HUMAN|P36383_K375	G-6599_DMSO_30min	-0.26244	0.347366	-0.755515	25.6502	0.456823	0.854558
CY1_HUMAN	P08574	Cytochrome c1, heme protein, mitochondrial	CYC1	CY1_HUMAN|P08574_K177	G-6599_DMSO_30min	0.898109	0.57479	1.5625	22.3771	0.132203	0.667972
CYB5B_HUMAN	O43169	Cytochrome b5 type B	CYB5B	CYB5B_HUMAN|O43169_K39	G-6599_DMSO_30min	-0.141711	0.357677	-0.3962	18.642	0.696456	0.938454
CYBP_HUMAN	Q9HB71	Calcyclin-binding protein	CACYBP	CYBP_HUMAN|Q9HB71_K146	G-6599_DMSO_30min	-0.44101	0.296685	-1.48646	22.6467	0.150948	0.68082
CYBP_HUMAN	Q9HB71	Calcyclin-binding protein	CACYBP	CYBP_HUMAN|Q9HB71_K207	G-6599_DMSO_30min	-0.411848	0.405889	-1.01468	19.464	0.322705	0.799327
CYBP_HUMAN	Q9HB71	Calcyclin-binding protein	CACYBP	CYBP_HUMAN|Q9HB71_K118	G-6599_DMSO_30min	-0.189264	0.369838	-0.511747	20.1852	0.614381	0.909948
CYBP_HUMAN	Q9HB71	Calcyclin-binding protein	CACYBP	CYBP_HUMAN|Q9HB71_K85	G-6599_DMSO_30min	0.00785846	0.517467	0.0151864	18.1595	0.988049	0.997403
CYBP_HUMAN	Q9HB71	Calcyclin-binding protein	CACYBP	CYBP_HUMAN|Q9HB71_K143	G-6599_DMSO_30min	-0.356728	0.274131	-1.3013	23.8673	0.205577	0.723177
CYC_HUMAN	P99999	Cytochrome c	CYCS	CYC_HUMAN|P99999_K80	G-6599_DMSO_30min	-0.304999	0.353137	-0.863685	23.6123	0.39645	0.824931
CYC_HUMAN	P99999	Cytochrome c	CYCS	CYC_HUMAN|P99999_K54	G-6599_DMSO_30min	-0.508565	0.415636	-1.22358	21.3845	0.234422	0.745609
CYFP1_HUMAN	Q7L576	Cytoplasmic FMR1-interacting protein 1	CYFIP1	CYFP1_HUMAN|Q7L576_K1038	G-6599_DMSO_30min	0.717729	0.869149	0.825784	16.6981	0.420569	0.835864
CYRIB_HUMAN	Q9NUQ9	NA	NA	CYRIB_HUMAN|Q9NUQ9_K199	G-6599_DMSO_30min	-0.176757	0.282247	-0.626251	20.6864	0.538	0.886177
CYTC_HUMAN	P01034	Cystatin-C	CST3	CYTC_HUMAN|P01034_K118	G-6599_DMSO_30min	-0.367348	0.286261	-1.28326	18.2993	0.215414	0.730927
CYTSA_HUMAN	Q69YQ0	Cytospin-A	SPECC1L	CYTSA_HUMAN|Q69YQ0_K846	G-6599_DMSO_30min	-0.302163	0.391735	-0.771347	18.4299	0.450279	0.853715
CYTSA_HUMAN	Q69YQ0	Cytospin-A	SPECC1L	CYTSA_HUMAN|Q69YQ0_K566	G-6599_DMSO_30min	0.000631473	0.371528	0.00169966	18.6912	0.998662	0.999539
CYTSB_HUMAN	Q5M775	Cytospin-B	SPECC1	CYTSB_HUMAN|Q5M775_K897	G-6599_DMSO_30min	-0.540555	0.472572	-1.14386	17.3494	0.26822	0.767949
D11L8_HUMAN	A8MPP1	Putative ATP-dependent RNA helicase DDX11-like protein 8	DDX11L8	D11L8_HUMAN|A8MPP1_K154	G-6599_DMSO_30min	-0.187328	0.305044	-0.614102	30.1511	0.543754	0.888437
DAD1_HUMAN	P61803	Dolichyl-diphosphooligosaccharide--protein glycosyltransferase subunit DAD1	DAD1	DAD1_HUMAN|P61803_K82	G-6599_DMSO_30min	0.408493	0.448644	0.910507	31.7455	0.369417	0.820652
DAG1_HUMAN	Q14118	Dystroglycan	DAG1	DAG1_HUMAN|Q14118_K808	G-6599_DMSO_30min	0.4555	0.724476	0.62873	13.514	0.540008	0.886675
DAG1_HUMAN	Q14118	Dystroglycan	DAG1	DAG1_HUMAN|Q14118_K794	G-6599_DMSO_30min	0.895067	1.02313	0.874831	16.4041	0.394294	0.824931
DAG1_HUMAN	Q14118	Dystroglycan	DAG1	DAG1_HUMAN|Q14118_K793	G-6599_DMSO_30min	-0.450557	0.274499	-1.64138	18.7911	0.117349	0.660532
DAPK3_HUMAN	O43293	Death-associated protein kinase 3	DAPK3	DAPK3_HUMAN|O43293_K425	G-6599_DMSO_30min	0.164374	0.282363	0.582137	17.6856	0.567822	0.894545
DAZP2_HUMAN	Q15038	DAZ-associated protein 2	DAZAP2	DAZP2_HUMAN|Q15038_K153	G-6599_DMSO_30min	-0.599637	0.551238	-1.0878	20.6546	0.289215	0.783787
DBLOH_HUMAN	Q9NR28	Diablo homolog, mitochondrial	DIABLO	DBLOH_HUMAN|Q9NR28_K123	G-6599_DMSO_30min	0.110202	1.17279	0.0939654	16.3834	0.926276	0.991061
DBR1_HUMAN	Q9UK59	Lariat debranching enzyme	DBR1	DBR1_HUMAN|Q9UK59_K250	G-6599_DMSO_30min	-0.380994	0.228134	-1.67004	19.2966	0.111053	0.650599
DBR1_HUMAN	Q9UK59	Lariat debranching enzyme	DBR1	DBR1_HUMAN|Q9UK59_K256	G-6599_DMSO_30min	-0.299704	0.231452	-1.29488	19.203	0.210714	0.726559
DC1L2_HUMAN	O43237	Cytoplasmic dynein 1 light intermediate chain 2	DYNC1LI2	DC1L2_HUMAN|O43237_K285	G-6599_DMSO_30min	-0.225065	0.286807	-0.784725	18.4096	0.442596	0.850051
DC2I2_HUMAN	Q96EX3	NA	NA	DC2I2_HUMAN|Q96EX3_K471	G-6599_DMSO_30min	-0.2853	0.260451	-1.09541	19.7405	0.286523	0.782104
DCA10_HUMAN	Q5QP82	DDB1- and CUL4-associated factor 10	DCAF10	DCA10_HUMAN|Q5QP82_K294	G-6599_DMSO_30min	0.128663	0.287442	0.447615	25.9186	0.65815	0.926734
DCA13_HUMAN	Q9NV06	DDB1- and CUL4-associated factor 13	DCAF13	DCA13_HUMAN|Q9NV06_K323	G-6599_DMSO_30min	-0.493712	0.224231	-2.2018	18.2012	0.0408082	0.553837
DCA13_HUMAN	Q9NV06	DDB1- and CUL4-associated factor 13	DCAF13	DCA13_HUMAN|Q9NV06_K371	G-6599_DMSO_30min	-0.430483	0.24921	-1.72739	17.8101	0.101399	0.640589
DCA13_HUMAN	Q9NV06	DDB1- and CUL4-associated factor 13	DCAF13	DCA13_HUMAN|Q9NV06_K380	G-6599_DMSO_30min	-0.590242	0.223237	-2.64402	18.2197	0.0163829	0.509558
DCAF1_HUMAN	Q9Y4B6	NA	NA	DCAF1_HUMAN|Q9Y4B6_K1196	G-6599_DMSO_30min	-0.200288	0.269196	-0.744023	18.6254	0.466146	0.858967
DCAF1_HUMAN	Q9Y4B6	NA	NA	DCAF1_HUMAN|Q9Y4B6_K819	G-6599_DMSO_30min	-0.196599	0.300924	-0.653319	18.1235	0.521753	0.884199
DCAF7_HUMAN	P61962	DDB1- and CUL4-associated factor 7	DCAF7	DCAF7_HUMAN|P61962_K167	G-6599_DMSO_30min	-0.662822	0.247761	-2.67524	25.8434	0.0127809	0.488622
DCAF8_HUMAN	Q5TAQ9	DDB1- and CUL4-associated factor 8	DCAF8	DCAF8_HUMAN|Q5TAQ9_K438	G-6599_DMSO_30min	-0.515259	0.243129	-2.11929	19.5532	0.0470731	0.571409
DCAF8_HUMAN	Q5TAQ9	DDB1- and CUL4-associated factor 8	DCAF8	DCAF8_HUMAN|Q5TAQ9_K274	G-6599_DMSO_30min	-0.413039	0.253079	-1.63205	19.2784	0.118896	0.661555
DCAKD_HUMAN	Q8WVC6	Dephospho-CoA kinase domain-containing protein	DCAKD	DCAKD_HUMAN|Q8WVC6_K168	G-6599_DMSO_30min	0.0128078	0.278516	0.0459858	19.7363	0.963784	0.995585
DCAKD_HUMAN	Q8WVC6	Dephospho-CoA kinase domain-containing protein	DCAKD	DCAKD_HUMAN|Q8WVC6_K67	G-6599_DMSO_30min	0.0307983	0.226342	0.13607	21.7467	0.893018	0.986333
DCAM_HUMAN	P17707	S-adenosylmethionine decarboxylase proenzyme	AMD1	DCAM_HUMAN|P17707_K301	G-6599_DMSO_30min	-0.566699	0.280731	-2.01866	20.1263	0.0570463	0.590169
DCAM_HUMAN	P17707	S-adenosylmethionine decarboxylase proenzyme	AMD1	DCAM_HUMAN|P17707_K119	G-6599_DMSO_30min	-0.711441	0.254589	-2.79446	21.0536	0.0108469	0.466658
DCAM_HUMAN	P17707	S-adenosylmethionine decarboxylase proenzyme	AMD1	DCAM_HUMAN|P17707_K276	G-6599_DMSO_30min	-0.349825	0.24493	-1.42826	21.4815	0.167595	0.694874
DCAM_HUMAN	P17707	S-adenosylmethionine decarboxylase proenzyme	AMD1	DCAM_HUMAN|P17707_K291	G-6599_DMSO_30min	-0.695424	0.277323	-2.50763	20.2311	0.0207813	0.529953
DCBD1_HUMAN	Q8N8Z6	Discoidin, CUB and LCCL domain-containing protein 1	DCBLD1	DCBD1_HUMAN|Q8N8Z6_K486	G-6599_DMSO_30min	-0.259079	0.255912	-1.01238	21.1002	0.322828	0.799416
DCBD2_HUMAN	Q96PD2	Discoidin, CUB and LCCL domain-containing protein 2	DCBLD2	DCBD2_HUMAN|Q96PD2_K772	G-6599_DMSO_30min	-0.107933	0.471703	-0.228816	16.8049	0.821774	0.967774
DCBD2_HUMAN	Q96PD2	Discoidin, CUB and LCCL domain-containing protein 2	DCBLD2	DCBD2_HUMAN|Q96PD2_K473	G-6599_DMSO_30min	0.284563	0.264438	1.0761	18.123	0.295998	0.789256
DCBD2_HUMAN	Q96PD2	Discoidin, CUB and LCCL domain-containing protein 2	DCBLD2	DCBD2_HUMAN|Q96PD2_K580	G-6599_DMSO_30min	-0.167977	0.294742	-0.569912	17.7389	0.575885	0.897576
DCBD2_HUMAN	Q96PD2	Discoidin, CUB and LCCL domain-containing protein 2	DCBLD2	DCBD2_HUMAN|Q96PD2_K559	G-6599_DMSO_30min	0.1345	0.453674	0.296468	16.8522	0.770495	0.959236
DCBD2_HUMAN	Q96PD2	Discoidin, CUB and LCCL domain-containing protein 2	DCBLD2	DCBD2_HUMAN|Q96PD2_K577	G-6599_DMSO_30min	-0.321638	0.28931	-1.11174	17.7985	0.281042	0.778338
DCBD2_HUMAN	Q96PD2	Discoidin, CUB and LCCL domain-containing protein 2	DCBLD2	DCBD2_HUMAN|Q96PD2_K586	G-6599_DMSO_30min	-0.108971	0.331603	-0.328619	17.4119	0.746363	0.953513
DCBD2_HUMAN	Q96PD2	Discoidin, CUB and LCCL domain-containing protein 2	DCBLD2	DCBD2_HUMAN|Q96PD2_K410	G-6599_DMSO_30min	0.0834319	0.258812	0.322365	18.2105	0.750848	0.953836
DCC1_HUMAN	Q9BVC3	Sister chromatid cohesion protein DCC1	DSCC1	DCC1_HUMAN|Q9BVC3_K247	G-6599_DMSO_30min	0.0489666	0.41027	0.119352	22.1075	0.906074	0.988943
DCK_HUMAN	P27707	Deoxycytidine kinase	DCK	DCK_HUMAN|P27707_K115	G-6599_DMSO_30min	-0.425436	0.268957	-1.5818	18.8807	0.130302	0.667972
DCLK1_HUMAN	O15075	Serine/threonine-protein kinase DCLK1	DCLK1	DCLK1_HUMAN|O15075_K429	G-6599_DMSO_30min	-0.12453	0.26326	-0.47303	18.898	0.64161	0.922083
DCLK1_HUMAN	O15075	Serine/threonine-protein kinase DCLK1	DCLK1	DCLK1_HUMAN|O15075_K482	G-6599_DMSO_30min	0.283035	0.578708	0.48908	16.753	0.631126	0.918656
DCNL1_HUMAN	Q96GG9	DCN1-like protein 1	DCUN1D1	DCNL1_HUMAN|Q96GG9_K143	G-6599_DMSO_30min	0.316071	0.506059	0.624573	16.9975	0.540545	0.887108
DCPS_HUMAN	Q96C86	m7GpppX diphosphatase	DCPS	DCPS_HUMAN|Q96C86_K138	G-6599_DMSO_30min	-0.636686	0.30489	-2.08825	18.9625	0.0505024	0.582956
DCPS_HUMAN	Q96C86	m7GpppX diphosphatase	DCPS	DCPS_HUMAN|Q96C86_K128	G-6599_DMSO_30min	0.144742	0.26296	0.550432	19.9872	0.588123	0.904609
DCTN1_HUMAN	Q14203	Dynactin subunit 1	DCTN1	DCTN1_HUMAN|Q14203_K1247	G-6599_DMSO_30min	0.130387	0.444131	0.293579	17.0284	0.772628	0.959236
DCTN1_HUMAN	Q14203	Dynactin subunit 1	DCTN1	DCTN1_HUMAN|Q14203_K556	G-6599_DMSO_30min	-0.0672528	0.292177	-0.230178	18.1284	0.820531	0.967371
DCTN2_HUMAN	Q13561	Dynactin subunit 2	DCTN2	DCTN2_HUMAN|Q13561_K289	G-6599_DMSO_30min	-0.201544	0.243843	-0.826532	18.4786	0.419048	0.835197
DCTN2_HUMAN	Q13561	Dynactin subunit 2	DCTN2	DCTN2_HUMAN|Q13561_K175	G-6599_DMSO_30min	0.116985	0.358762	0.326081	17.2363	0.748289	0.953513
DCTN2_HUMAN	Q13561	Dynactin subunit 2	DCTN2	DCTN2_HUMAN|Q13561_K146	G-6599_DMSO_30min	-0.273908	0.274498	-0.997848	17.9827	0.331592	0.803357
DCTN2_HUMAN	Q13561	Dynactin subunit 2	DCTN2	DCTN2_HUMAN|Q13561_K140	G-6599_DMSO_30min	-0.223018	0.303709	-0.734313	17.6495	0.472402	0.862769
DCTN3_HUMAN	O75935	Dynactin subunit 3	DCTN3	DCTN3_HUMAN|O75935_K39	G-6599_DMSO_30min	-0.0704497	0.38563	-0.182688	18.7397	0.857005	0.976159
DCTN4_HUMAN	Q9UJW0	Dynactin subunit 4	DCTN4	DCTN4_HUMAN|Q9UJW0_K399	G-6599_DMSO_30min	-0.170333	0.231806	-0.734811	19.0598	0.4714	0.861966
DCTN4_HUMAN	Q9UJW0	Dynactin subunit 4	DCTN4	DCTN4_HUMAN|Q9UJW0_K181	G-6599_DMSO_30min	-0.507514	0.341753	-1.48503	17.4821	0.155344	0.685018
DCTN4_HUMAN	Q9UJW0	Dynactin subunit 4	DCTN4	DCTN4_HUMAN|Q9UJW0_K18	G-6599_DMSO_30min	-0.352056	0.257983	-1.36465	18.4837	0.188748	0.706959
DCTN4_HUMAN	Q9UJW0	Dynactin subunit 4	DCTN4	DCTN4_HUMAN|Q9UJW0_K146	G-6599_DMSO_30min	-0.377889	0.282952	-1.33552	18.0852	0.198272	0.715877
DCXR_HUMAN	Q7Z4W1	L-xylulose reductase	DCXR	DCXR_HUMAN|Q7Z4W1_K171	G-6599_DMSO_30min	0.160854	0.267826	0.600592	23.1752	0.553941	0.890628
DDA1_HUMAN	Q9BW61	DET1- and DDB1-associated protein 1	DDA1	DDA1_HUMAN|Q9BW61_K51	G-6599_DMSO_30min	0.125795	0.516833	0.243396	19.5745	0.810231	0.966599
DDB1_HUMAN	Q16531	DNA damage-binding protein 1	DDB1	DDB1_HUMAN|Q16531_K1121	G-6599_DMSO_30min	0.160834	0.44483	0.361562	16.6864	0.722217	0.946728
DDB1_HUMAN	Q16531	DNA damage-binding protein 1	DDB1	DDB1_HUMAN|Q16531_K1067	G-6599_DMSO_30min	0.0721991	0.226111	0.319309	18.0601	0.753156	0.953977
DDB1_HUMAN	Q16531	DNA damage-binding protein 1	DDB1	DDB1_HUMAN|Q16531_K867	G-6599_DMSO_30min	-0.179351	0.408232	-0.439336	16.773	0.666026	0.928882
DDB1_HUMAN	Q16531	DNA damage-binding protein 1	DDB1	DDB1_HUMAN|Q16531_K879	G-6599_DMSO_30min	-0.555834	0.632245	-0.879143	16.455	0.391981	0.824931
DDB1_HUMAN	Q16531	DNA damage-binding protein 1	DDB1	DDB1_HUMAN|Q16531_K823	G-6599_DMSO_30min	0.088295	0.742218	0.118961	16.3933	0.906752	0.988943
DDB1_HUMAN	Q16531	DNA damage-binding protein 1	DDB1	DDB1_HUMAN|Q16531_K936	G-6599_DMSO_30min	0.144505	0.430801	0.335433	16.7169	0.741471	0.952815
DDB1_HUMAN	Q16531	DNA damage-binding protein 1	DDB1	DDB1_HUMAN|Q16531_K254	G-6599_DMSO_30min	-0.233769	0.26167	-0.893373	17.5797	0.383725	0.824931
DDB1_HUMAN	Q16531	DNA damage-binding protein 1	DDB1	DDB1_HUMAN|Q16531_K92	G-6599_DMSO_30min	-0.166156	0.33836	-0.491064	17.0255	0.629651	0.917816
DDB1_HUMAN	Q16531	DNA damage-binding protein 1	DDB1	DDB1_HUMAN|Q16531_K857	G-6599_DMSO_30min	0.0105701	0.357472	0.0295689	16.9412	0.976756	0.997104
DDB1_HUMAN	Q16531	DNA damage-binding protein 1	DDB1	DDB1_HUMAN|Q16531_K141	G-6599_DMSO_30min	0.218728	0.377016	0.580156	16.8681	0.569479	0.89573
DDB1_HUMAN	Q16531	DNA damage-binding protein 1	DDB1	DDB1_HUMAN|Q16531_K579	G-6599_DMSO_30min	0.0403846	0.339023	0.119121	17.0224	0.906574	0.988943
DDB1_HUMAN	Q16531	DNA damage-binding protein 1	DDB1	DDB1_HUMAN|Q16531_K287	G-6599_DMSO_30min	0.154581	0.859348	0.179882	16.352	0.859456	0.97617
DDB1_HUMAN	Q16531	DNA damage-binding protein 1	DDB1	DDB1_HUMAN|Q16531_K383	G-6599_DMSO_30min	-0.73098	0.431006	-1.69599	13.6274	0.112602	0.652347
DDB1_HUMAN	Q16531	DNA damage-binding protein 1	DDB1	DDB1_HUMAN|Q16531_K723	G-6599_DMSO_30min	-0.0274456	0.226608	-0.121115	18.0517	0.904938	0.988943
DDB1_HUMAN	Q16531	DNA damage-binding protein 1	DDB1	DDB1_HUMAN|Q16531_K570	G-6599_DMSO_30min	-0.179615	0.239849	-0.748868	17.8477	0.463693	0.85814
DDI2_HUMAN	Q5TDH0	Protein DDI1 homolog 2	DDI2	DDI2_HUMAN|Q5TDH0_K153	G-6599_DMSO_30min	0.0373543	0.319527	0.116905	17.4972	0.908267	0.988943
DDI2_HUMAN	Q5TDH0	Protein DDI1 homolog 2	DDI2	DDI2_HUMAN|Q5TDH0_K283	G-6599_DMSO_30min	-0.258767	0.238717	-1.08399	18.5623	0.292248	0.786871
DDI2_HUMAN	Q5TDH0	Protein DDI1 homolog 2	DDI2	DDI2_HUMAN|Q5TDH0_K389	G-6599_DMSO_30min	-0.059099	0.445257	-0.13273	16.872	0.895977	0.98684
DDRGK_HUMAN	Q96HY6	DDRGK domain-containing protein 1	DDRGK1	DDRGK_HUMAN|Q96HY6_K227	G-6599_DMSO_30min	0.0413171	0.550367	0.0750719	16.8421	0.941042	0.991365
DDRGK_HUMAN	Q96HY6	DDRGK domain-containing protein 1	DDRGK1	DDRGK_HUMAN|Q96HY6_K267	G-6599_DMSO_30min	-0.202541	0.544883	-0.371715	16.8547	0.714737	0.944559
DDX1_HUMAN	Q92499	ATP-dependent RNA helicase DDX1	DDX1	DDX1_HUMAN|Q92499_K596	G-6599_DMSO_30min	-0.769753	0.303826	-2.53353	17.8298	0.0209033	0.529953
DDX1_HUMAN	Q92499	ATP-dependent RNA helicase DDX1	DDX1	DDX1_HUMAN|Q92499_K311	G-6599_DMSO_30min	-0.328616	0.253331	-1.29718	18.5742	0.210452	0.726559
DDX1_HUMAN	Q92499	ATP-dependent RNA helicase DDX1	DDX1	DDX1_HUMAN|Q92499_K172	G-6599_DMSO_30min	-0.632109	0.274975	-2.29879	18.2016	0.0335681	0.545928
DDX1_HUMAN	Q92499	ATP-dependent RNA helicase DDX1	DDX1	DDX1_HUMAN|Q92499_K307	G-6599_DMSO_30min	-0.376169	0.292409	-1.28645	17.9631	0.214621	0.730927
DDX10_HUMAN	Q13206	Probable ATP-dependent RNA helicase DDX10	DDX10	DDX10_HUMAN|Q13206_K97	G-6599_DMSO_30min	-0.467665	0.288552	-1.62073	25.8324	0.117219	0.660532
DDX10_HUMAN	Q13206	Probable ATP-dependent RNA helicase DDX10	DDX10	DDX10_HUMAN|Q13206_K258	G-6599_DMSO_30min	-0.716727	0.321209	-2.23134	23.8432	0.0353254	0.553837
DDX17_HUMAN	Q92841	Probable ATP-dependent RNA helicase DDX17	DDX17	DDX17_HUMAN|Q92841_K515	G-6599_DMSO_30min	-0.533718	0.289197	-1.84552	18.7088	0.0808494	0.619668
DDX17_HUMAN	Q92841	Probable ATP-dependent RNA helicase DDX17	DDX17	DDX17_HUMAN|Q92841_K284	G-6599_DMSO_30min	-0.132918	0.252076	-0.527292	19.5563	0.603922	0.909435
DDX17_HUMAN	Q92841	Probable ATP-dependent RNA helicase DDX17	DDX17	DDX17_HUMAN|Q92841_K361	G-6599_DMSO_30min	-0.220252	0.283426	-0.777105	18.8174	0.446756	0.852342
DDX17_HUMAN	Q92841	Probable ATP-dependent RNA helicase DDX17	DDX17	DDX17_HUMAN|Q92841_K132	G-6599_DMSO_30min	-0.106578	0.434444	-0.24532	17.2897	0.809097	0.966375
DDX17_HUMAN	Q92841	Probable ATP-dependent RNA helicase DDX17	DDX17	DDX17_HUMAN|Q92841_K468	G-6599_DMSO_30min	-0.539557	0.236438	-2.28203	20.0508	0.0335439	0.545928
DDX17_HUMAN	Q92841	Probable ATP-dependent RNA helicase DDX17	DDX17	DDX17_HUMAN|Q92841_K274	G-6599_DMSO_30min	-0.277717	0.273075	-1.017	19.0312	0.32191	0.799008
DDX18_HUMAN	Q9NVP1	ATP-dependent RNA helicase DDX18	DDX18	DDX18_HUMAN|Q9NVP1_K571	G-6599_DMSO_30min	-0.250464	0.223046	-1.12292	21.4908	0.273858	0.774318
DDX21_HUMAN	Q9NR30	Nucleolar RNA helicase 2	DDX21	DDX21_HUMAN|Q9NR30_K406	G-6599_DMSO_30min	-0.370018	0.286199	-1.29287	18.7009	0.211801	0.727804
DDX21_HUMAN	Q9NR30	Nucleolar RNA helicase 2	DDX21	DDX21_HUMAN|Q9NR30_K573	G-6599_DMSO_30min	-0.426674	0.281872	-1.51371	18.7822	0.146745	0.677931
DDX21_HUMAN	Q9NR30	Nucleolar RNA helicase 2	DDX21	DDX21_HUMAN|Q9NR30_K678	G-6599_DMSO_30min	-0.197836	0.382924	-0.516646	17.5718	0.611845	0.909948
DDX21_HUMAN	Q9NR30	Nucleolar RNA helicase 2	DDX21	DDX21_HUMAN|Q9NR30_K236	G-6599_DMSO_30min	-0.365337	0.307442	-1.18831	18.3533	0.249861	0.757526
DDX23_HUMAN	Q9BUQ8	Probable ATP-dependent RNA helicase DDX23	DDX23	DDX23_HUMAN|Q9BUQ8_K760	G-6599_DMSO_30min	-0.470727	0.431596	-1.09067	18.6338	0.289322	0.783787
DDX23_HUMAN	Q9BUQ8	Probable ATP-dependent RNA helicase DDX23	DDX23	DDX23_HUMAN|Q9BUQ8_K326	G-6599_DMSO_30min	-0.712567	0.284839	-2.50165	22.1485	0.0202365	0.529953
DDX23_HUMAN	Q9BUQ8	Probable ATP-dependent RNA helicase DDX23	DDX23	DDX23_HUMAN|Q9BUQ8_K310	G-6599_DMSO_30min	-0.860589	0.301126	-2.8579	21.4659	0.00928852	0.462987
DDX24_HUMAN	Q9GZR7	ATP-dependent RNA helicase DDX24	DDX24	DDX24_HUMAN|Q9GZR7_K417	G-6599_DMSO_30min	-0.222245	0.250126	-0.888531	18.5138	0.385654	0.824931
DDX24_HUMAN	Q9GZR7	ATP-dependent RNA helicase DDX24	DDX24	DDX24_HUMAN|Q9GZR7_K404	G-6599_DMSO_30min	-0.260529	0.225858	-1.15351	19.0677	0.262957	0.764164
DDX24_HUMAN	Q9GZR7	ATP-dependent RNA helicase DDX24	DDX24	DDX24_HUMAN|Q9GZR7_K290	G-6599_DMSO_30min	-0.438155	0.427087	-1.02591	16.9831	0.319324	0.798557
DDX24_HUMAN	Q9GZR7	ATP-dependent RNA helicase DDX24	DDX24	DDX24_HUMAN|Q9GZR7_K453	G-6599_DMSO_30min	-0.494767	0.236593	-2.09121	18.8	0.0503289	0.582956
DDX24_HUMAN	Q9GZR7	ATP-dependent RNA helicase DDX24	DDX24	DDX24_HUMAN|Q9GZR7_K701	G-6599_DMSO_30min	-0.516527	0.305064	-1.69317	17.7356	0.107913	0.646431
DDX24_HUMAN	Q9GZR7	ATP-dependent RNA helicase DDX24	DDX24	DDX24_HUMAN|Q9GZR7_K655	G-6599_DMSO_30min	-0.590378	0.248466	-2.37609	18.5462	0.0284483	0.545928
DDX24_HUMAN	Q9GZR7	ATP-dependent RNA helicase DDX24	DDX24	DDX24_HUMAN|Q9GZR7_K71	G-6599_DMSO_30min	-0.778823	0.27002	-2.88432	18.1733	0.00980587	0.466658
DDX24_HUMAN	Q9GZR7	ATP-dependent RNA helicase DDX24	DDX24	DDX24_HUMAN|Q9GZR7_K381	G-6599_DMSO_30min	-0.578381	0.257058	-2.25	18.3855	0.0369152	0.553837
DDX3X_HUMAN	O00571	ATP-dependent RNA helicase DDX3X	DDX3X	DDX3X_HUMAN|O00571_K215	G-6599_DMSO_30min	-0.119818	0.508069	-0.23583	17.0659	0.816371	0.966647
DDX3X_HUMAN	O00571	ATP-dependent RNA helicase DDX3X	DDX3X	DDX3X_HUMAN|O00571_K335	G-6599_DMSO_30min	-0.23809	0.201746	-1.18015	22.1469	0.250461	0.757526
DDX3X_HUMAN	O00571	ATP-dependent RNA helicase DDX3X	DDX3X	DDX3X_HUMAN|O00571_K264	G-6599_DMSO_30min	-0.348688	0.246676	-1.41355	20.0382	0.172843	0.699019
DDX46_HUMAN	Q7L014	Probable ATP-dependent RNA helicase DDX46	DDX46	DDX46_HUMAN|Q7L014_K907	G-6599_DMSO_30min	-0.470668	0.258233	-1.82265	19.4525	0.0837653	0.625206
DDX46_HUMAN	Q7L014	Probable ATP-dependent RNA helicase DDX46	DDX46	DDX46_HUMAN|Q7L014_K463	G-6599_DMSO_30min	-0.320839	0.238183	-1.34703	20.068	0.192987	0.711571
DDX46_HUMAN	Q7L014	Probable ATP-dependent RNA helicase DDX46	DDX46	DDX46_HUMAN|Q7L014_K903	G-6599_DMSO_30min	-0.379377	0.386985	-0.980339	17.6022	0.340202	0.806466
DDX46_HUMAN	Q7L014	Probable ATP-dependent RNA helicase DDX46	DDX46	DDX46_HUMAN|Q7L014_K271	G-6599_DMSO_30min	-0.760216	0.287366	-2.64546	18.7934	0.016052	0.509558
DDX46_HUMAN	Q7L014	Probable ATP-dependent RNA helicase DDX46	DDX46	DDX46_HUMAN|Q7L014_K493	G-6599_DMSO_30min	-0.229658	0.301267	-0.762305	18.5487	0.455463	0.853715
DDX46_HUMAN	Q7L014	Probable ATP-dependent RNA helicase DDX46	DDX46	DDX46_HUMAN|Q7L014_K263	G-6599_DMSO_30min	-0.457188	0.275124	-1.66175	19.0429	0.112937	0.652347
DDX46_HUMAN	Q7L014	Probable ATP-dependent RNA helicase DDX46	DDX46	DDX46_HUMAN|Q7L014_K716	G-6599_DMSO_30min	-0.278721	0.386889	-0.720417	17.6029	0.480726	0.865769
DDX47_HUMAN	Q9H0S4	Probable ATP-dependent RNA helicase DDX47	DDX47	DDX47_HUMAN|Q9H0S4_K221	G-6599_DMSO_30min	-0.63691	0.224529	-2.83665	18.2865	0.0108229	0.466658
DDX47_HUMAN	Q9H0S4	Probable ATP-dependent RNA helicase DDX47	DDX47	DDX47_HUMAN|Q9H0S4_K384	G-6599_DMSO_30min	1.77097	1.84183	0.961525	14.2566	0.352314	0.813565
DDX47_HUMAN	Q9H0S4	Probable ATP-dependent RNA helicase DDX47	DDX47	DDX47_HUMAN|Q9H0S4_K362	G-6599_DMSO_30min	0.0495964	0.492532	0.100697	16.6397	0.920995	0.991061
DDX47_HUMAN	Q9H0S4	Probable ATP-dependent RNA helicase DDX47	DDX47	DDX47_HUMAN|Q9H0S4_K161	G-6599_DMSO_30min	-0.395688	0.244946	-1.61541	17.9431	0.123668	0.663348
DDX47_HUMAN	Q9H0S4	Probable ATP-dependent RNA helicase DDX47	DDX47	DDX47_HUMAN|Q9H0S4_K211	G-6599_DMSO_30min	-0.423361	0.360979	-1.17281	16.9996	0.257043	0.759612
DDX47_HUMAN	Q9H0S4	Probable ATP-dependent RNA helicase DDX47	DDX47	DDX47_HUMAN|Q9H0S4_K210	G-6599_DMSO_30min	-0.5474	0.298858	-1.83164	17.3636	0.0842174	0.625206
DDX47_HUMAN	Q9H0S4	Probable ATP-dependent RNA helicase DDX47	DDX47	DDX47_HUMAN|Q9H0S4_K46	G-6599_DMSO_30min	-0.111181	0.463643	-0.239799	16.6929	0.813406	0.966647
DDX47_HUMAN	Q9H0S4	Probable ATP-dependent RNA helicase DDX47	DDX47	DDX47_HUMAN|Q9H0S4_K231	G-6599_DMSO_30min	-0.280311	0.244329	-1.14727	17.9522	0.26633	0.766441
DDX5_HUMAN	P17844	Probable ATP-dependent RNA helicase DDX5	DDX5	DDX5_HUMAN|P17844_K437	G-6599_DMSO_30min	-0.283356	0.302789	-0.93582	19.6073	0.36075	0.817557
DDX5_HUMAN	P17844	Probable ATP-dependent RNA helicase DDX5	DDX5	DDX5_HUMAN|P17844_K40	G-6599_DMSO_30min	-0.480682	0.276437	-1.73885	20.3447	0.0971724	0.636286
DDX54_HUMAN	Q8TDD1	ATP-dependent RNA helicase DDX54	DDX54	DDX54_HUMAN|Q8TDD1_K383	G-6599_DMSO_30min	-0.426444	0.267295	-1.59541	19.3657	0.126812	0.665478
DDX54_HUMAN	Q8TDD1	ATP-dependent RNA helicase DDX54	DDX54	DDX54_HUMAN|Q8TDD1_K418	G-6599_DMSO_30min	-0.333145	0.359979	-0.925456	17.8992	0.367039	0.819685
DDX56_HUMAN	Q9NY93	Probable ATP-dependent RNA helicase DDX56	DDX56	DDX56_HUMAN|Q9NY93_K45	G-6599_DMSO_30min	0.238192	0.386492	0.616293	17.2407	0.545753	0.888903
DDX6_HUMAN	P26196	Probable ATP-dependent RNA helicase DDX6	DDX6	DDX6_HUMAN|P26196_K77	G-6599_DMSO_30min	-0.539625	0.269739	-2.00054	25.9422	0.0560099	0.590169
DEDD_HUMAN	O75618	Death effector domain-containing protein	DEDD	DEDD_HUMAN|O75618_K282	G-6599_DMSO_30min	-0.381491	0.229184	-1.66456	19.0341	0.112376	0.652347
DEGS1_HUMAN	O15121	Sphingolipid delta(4)-desaturase DES1	DEGS1	DEGS1_HUMAN|O15121_K29	G-6599_DMSO_30min	-0.228862	0.278056	-0.82308	21.2654	0.419597	0.835197
DEK_HUMAN	P35659	Protein DEK	DEK	DEK_HUMAN|P35659_K100	G-6599_DMSO_30min	1.0928	1.13897	0.959466	16.3174	0.351326	0.812941
DEK_HUMAN	P35659	Protein DEK	DEK	DEK_HUMAN|P35659_K125	G-6599_DMSO_30min	-0.324162	0.224195	-1.44589	18.597	0.164851	0.69168
DEK_HUMAN	P35659	Protein DEK	DEK	DEK_HUMAN|P35659_K84	G-6599_DMSO_30min	-0.339856	0.228339	-1.48838	18.5069	0.153492	0.684841
DEN4C_HUMAN	Q5VZ89	DENN domain-containing protein 4C	DENND4C	DEN4C_HUMAN|Q5VZ89_K754	G-6599_DMSO_30min	-0.117916	0.287624	-0.409966	28.9955	0.684844	0.936458
DEN4C_HUMAN	Q5VZ89	DENN domain-containing protein 4C	DENND4C	DEN4C_HUMAN|Q5VZ89_K287	G-6599_DMSO_30min	0.0493445	0.275527	0.179091	29.9585	0.859072	0.976159
DEN4C_HUMAN	Q5VZ89	DENN domain-containing protein 4C	DENND4C	DEN4C_HUMAN|Q5VZ89_K1367	G-6599_DMSO_30min	-0.189116	0.356555	-0.530399	24.4614	0.600618	0.90741
DEN6A_HUMAN	Q8IWF6	Protein DENND6A	DENND6A	DEN6A_HUMAN|Q8IWF6_K144	G-6599_DMSO_30min	-0.247	0.225639	-1.09467	21.7658	0.285627	0.78192
DENR_HUMAN	O43583	Density-regulated protein	DENR	DENR_HUMAN|O43583_K142	G-6599_DMSO_30min	-0.129998	0.342945	-0.379063	18.4976	0.708957	0.942991
DEOC_HUMAN	Q9Y315	Deoxyribose-phosphate aldolase	DERA	DEOC_HUMAN|Q9Y315_K17	G-6599_DMSO_30min	0.0673691	0.502739	0.134004	23.272	0.894552	0.986529
DESM_HUMAN	P17661	Desmin	DES	DESM_HUMAN|P17661_K109	G-6599_DMSO_30min	0.0179355	0.714821	0.0250908	16.6173	0.980281	0.997244
DESP_HUMAN	P15924	Desmoplakin	DSP	DESP_HUMAN|P15924_K1033	G-6599_DMSO_30min	0.0438458	0.464366	0.094421	19.8289	0.925722	0.991061
DESP_HUMAN	P15924	Desmoplakin	DSP	DESP_HUMAN|P15924_K94	G-6599_DMSO_30min	-0.579849	0.291128	-1.99173	26.2077	0.0569164	0.590169
DESP_HUMAN	P15924	Desmoplakin	DSP	DESP_HUMAN|P15924_K1056	G-6599_DMSO_30min	-0.213601	0.288552	-0.740251	26.3949	0.465682	0.858835
DESP_HUMAN	P15924	Desmoplakin	DSP	DESP_HUMAN|P15924_K140	G-6599_DMSO_30min	-0.426107	0.300316	-1.41886	25.5724	0.168014	0.695773
DEST_HUMAN	P60981	Destrin	DSTN	DEST_HUMAN|P60981_K92	G-6599_DMSO_30min	-0.114687	0.324472	-0.353457	19.0462	0.727628	0.947898
DEST_HUMAN	P60981	Destrin	DSTN	DEST_HUMAN|P60981_K44	G-6599_DMSO_30min	-0.168242	0.285663	-0.588951	19.935	0.562509	0.893163
DFFA_HUMAN	O00273	DNA fragmentation factor subunit alpha	DFFA	DFFA_HUMAN|O00273_K213	G-6599_DMSO_30min	-0.221501	0.35805	-0.618632	17.1889	0.54427	0.888778
DGCR8_HUMAN	Q8WYQ5	Microprocessor complex subunit DGCR8	DGCR8	DGCR8_HUMAN|Q8WYQ5_K500	G-6599_DMSO_30min	-0.377688	0.249356	-1.51465	20.173	0.145373	0.676452
DGCR8_HUMAN	Q8WYQ5	Microprocessor complex subunit DGCR8	DGCR8	DGCR8_HUMAN|Q8WYQ5_K723	G-6599_DMSO_30min	-0.0670852	0.26404	-0.254072	19.7129	0.802072	0.964756
DGKE_HUMAN	P52429	Diacylglycerol kinase epsilon	DGKE	DGKE_HUMAN|P52429_K215	G-6599_DMSO_30min	-0.300946	0.288539	-1.043	19.2591	0.309865	0.793403
DGLB_HUMAN	Q8NCG7	Sn1-specific diacylglycerol lipase beta	DAGLB	DGLB_HUMAN|Q8NCG7_K198	G-6599_DMSO_30min	-0.0118372	0.269972	-0.0438462	17.8048	0.965515	0.995716
DGUOK_HUMAN	Q16854	Deoxyguanosine kinase, mitochondrial	DGUOK	DGUOK_HUMAN|Q16854_K275	G-6599_DMSO_30min	0.0360545	0.301118	0.119735	20.0049	0.905887	0.988943
DHB11_HUMAN	Q8NBQ5	Estradiol 17-beta-dehydrogenase 11	HSD17B11	DHB11_HUMAN|Q8NBQ5_K86	G-6599_DMSO_30min	-0.228699	0.338317	-0.675991	22.0514	0.506075	0.874964
DHB11_HUMAN	Q8NBQ5	Estradiol 17-beta-dehydrogenase 11	HSD17B11	DHB11_HUMAN|Q8NBQ5_K105	G-6599_DMSO_30min	0.513315	0.58446	0.878273	18.0246	0.391353	0.824931
DHB11_HUMAN	Q8NBQ5	Estradiol 17-beta-dehydrogenase 11	HSD17B11	DHB11_HUMAN|Q8NBQ5_K79	G-6599_DMSO_30min	0.603675	0.53014	1.13871	18.4335	0.269408	0.76883
DHB11_HUMAN	Q8NBQ5	Estradiol 17-beta-dehydrogenase 11	HSD17B11	DHB11_HUMAN|Q8NBQ5_K70	G-6599_DMSO_30min	-0.0807456	0.378292	-0.213448	20.7839	0.833058	0.970036
DHB4_HUMAN	P51659	Peroxisomal multifunctional enzyme type 2	HSD17B4	DHB4_HUMAN|P51659_K644	G-6599_DMSO_30min	-0.274417	0.236566	-1.16	18.7952	0.260572	0.762312
DHB4_HUMAN	P51659	Peroxisomal multifunctional enzyme type 2	HSD17B4	DHB4_HUMAN|P51659_K46	G-6599_DMSO_30min	-0.190384	0.275608	-0.690778	18.0876	0.498475	0.871731
DHB7_HUMAN	P56937	3-keto-steroid reductase	HSD17B7	DHB7_HUMAN|P56937_K321	G-6599_DMSO_30min	-0.228207	0.246776	-0.924754	22.2907	0.364997	0.819217
DHC24_HUMAN	Q15392	Delta(24)-sterol reductase	DHCR24	DHC24_HUMAN|Q15392_K496	G-6599_DMSO_30min	0.251898	0.873626	0.288336	16.6462	0.776649	0.95959
DHC24_HUMAN	Q15392	Delta(24)-sterol reductase	DHCR24	DHC24_HUMAN|Q15392_K254	G-6599_DMSO_30min	-0.364469	0.264451	-1.37821	21.2784	0.182459	0.7048
DHPR_HUMAN	P09417	Dihydropteridine reductase	QDPR	DHPR_HUMAN|P09417_K138	G-6599_DMSO_30min	-0.0398865	0.434428	-0.0918139	22.372	0.927663	0.991061
DHRS3_HUMAN	O75911	Short-chain dehydrogenase/reductase 3	DHRS3	DHRS3_HUMAN|O75911_K32	G-6599_DMSO_30min	-0.0312729	0.275066	-0.113692	17.7904	0.910755	0.989281
DHRS4_HUMAN	Q9BTZ2	Dehydrogenase/reductase SDR family member 4	DHRS4	DHRS4_HUMAN|Q9BTZ2_K150	G-6599_DMSO_30min	-0.132476	0.262049	-0.505541	20.0529	0.618691	0.912567
DHRS4_HUMAN	Q9BTZ2	Dehydrogenase/reductase SDR family member 4	DHRS4	DHRS4_HUMAN|Q9BTZ2_K216	G-6599_DMSO_30min	-0.321987	0.321007	-1.00305	18.7022	0.328637	0.802715
DHRS7_HUMAN	Q9Y394	Dehydrogenase/reductase SDR family member 7	DHRS7	DHRS7_HUMAN|Q9Y394_K101	G-6599_DMSO_30min	-0.269956	0.294618	-0.916291	23.0608	0.368998	0.82061
DHSO_HUMAN	Q00796	Sorbitol dehydrogenase	SORD	DHSO_HUMAN|Q00796_K226	G-6599_DMSO_30min	-0.00669045	0.416546	-0.0160617	17.8318	0.987363	0.997403
DHX15_HUMAN	O43143	Putative pre-mRNA-splicing factor ATP-dependent RNA helicase DHX15	DHX15	DHX15_HUMAN|O43143_K384	G-6599_DMSO_30min	-0.0213622	0.387279	-0.0551598	19.3115	0.956578	0.994127
DHX15_HUMAN	O43143	Putative pre-mRNA-splicing factor ATP-dependent RNA helicase DHX15	DHX15	DHX15_HUMAN|O43143_K277	G-6599_DMSO_30min	-0.455921	0.753487	-0.605082	16.9986	0.553118	0.890599
DHX15_HUMAN	O43143	Putative pre-mRNA-splicing factor ATP-dependent RNA helicase DHX15	DHX15	DHX15_HUMAN|O43143_K17	G-6599_DMSO_30min	-0.433649	0.280573	-1.54558	22.4577	0.136181	0.667972
DHX15_HUMAN	O43143	Putative pre-mRNA-splicing factor ATP-dependent RNA helicase DHX15	DHX15	DHX15_HUMAN|O43143_K407	G-6599_DMSO_30min	-0.0945704	0.291441	-0.324492	21.9568	0.748637	0.953572
DHX15_HUMAN	O43143	Putative pre-mRNA-splicing factor ATP-dependent RNA helicase DHX15	DHX15	DHX15_HUMAN|O43143_K786	G-6599_DMSO_30min	-0.69616	0.276523	-2.51755	22.6608	0.0193545	0.529953
DHX15_HUMAN	O43143	Putative pre-mRNA-splicing factor ATP-dependent RNA helicase DHX15	DHX15	DHX15_HUMAN|O43143_K488	G-6599_DMSO_30min	-0.297845	0.295565	-1.00772	21.7821	0.324655	0.800192
DHX15_HUMAN	O43143	Putative pre-mRNA-splicing factor ATP-dependent RNA helicase DHX15	DHX15	DHX15_HUMAN|O43143_K230	G-6599_DMSO_30min	-0.0576188	0.327643	-0.175859	20.6578	0.862118	0.977008
DHX15_HUMAN	O43143	Putative pre-mRNA-splicing factor ATP-dependent RNA helicase DHX15	DHX15	DHX15_HUMAN|O43143_K515	G-6599_DMSO_30min	-0.126611	0.25666	-0.493302	23.8083	0.626319	0.916061
DHX29_HUMAN	Q7Z478	ATP-dependent RNA helicase DHX29	DHX29	DHX29_HUMAN|Q7Z478_K494	G-6599_DMSO_30min	-2.45903	0.640103	-3.84161	17.9215	0.00120338	0.190716
DHX32_HUMAN	Q7L7V1	Putative pre-mRNA-splicing factor ATP-dependent RNA helicase DHX32	DHX32	DHX32_HUMAN|Q7L7V1_K389	G-6599_DMSO_30min	-0.106155	0.220084	-0.482337	19.3915	0.634966	0.919586
DHX33_HUMAN	Q9H6R0	Putative ATP-dependent RNA helicase DHX33	DHX33	DHX33_HUMAN|Q9H6R0_K496	G-6599_DMSO_30min	-0.118569	0.208984	-0.567361	19.928	0.576806	0.898035
DHX37_HUMAN	Q8IY37	Probable ATP-dependent RNA helicase DHX37	DHX37	DHX37_HUMAN|Q8IY37_K425	G-6599_DMSO_30min	-0.386156	0.243516	-1.58575	19.5208	0.128862	0.666207
DHX8_HUMAN	Q14562	ATP-dependent RNA helicase DHX8	DHX8	DHX8_HUMAN|Q14562_K1056	G-6599_DMSO_30min	-0.463956	0.281993	-1.64527	17.8599	0.117398	0.660532
DHX9_HUMAN	Q08211	ATP-dependent RNA helicase A	DHX9	DHX9_HUMAN|Q08211_K697	G-6599_DMSO_30min	-0.131779	0.279936	-0.470748	17.6332	0.643592	0.922152
DHX9_HUMAN	Q08211	ATP-dependent RNA helicase A	DHX9	DHX9_HUMAN|Q08211_K417	G-6599_DMSO_30min	-0.335463	0.355535	-0.943544	17.0875	0.358553	0.815854
DHX9_HUMAN	Q08211	ATP-dependent RNA helicase A	DHX9	DHX9_HUMAN|Q08211_K264	G-6599_DMSO_30min	-0.389604	0.332107	-1.17313	17.2161	0.25672	0.759612
DHX9_HUMAN	Q08211	ATP-dependent RNA helicase A	DHX9	DHX9_HUMAN|Q08211_K1037	G-6599_DMSO_30min	-0.348291	0.239171	-1.45624	18.1793	0.16238	0.69168
DHX9_HUMAN	Q08211	ATP-dependent RNA helicase A	DHX9	DHX9_HUMAN|Q08211_K1048	G-6599_DMSO_30min	-0.330904	0.240591	-1.37538	18.1552	0.185748	0.70689
DHX9_HUMAN	Q08211	ATP-dependent RNA helicase A	DHX9	DHX9_HUMAN|Q08211_K1116	G-6599_DMSO_30min	0.0603306	0.384869	0.156756	16.9593	0.877288	0.98234
DHX9_HUMAN	Q08211	ATP-dependent RNA helicase A	DHX9	DHX9_HUMAN|Q08211_K265	G-6599_DMSO_30min	-0.629086	0.26684	-2.35754	17.7802	0.0300687	0.545928
DHX9_HUMAN	Q08211	ATP-dependent RNA helicase A	DHX9	DHX9_HUMAN|Q08211_K191	G-6599_DMSO_30min	-0.429796	0.235777	-1.82289	18.2388	0.0847555	0.625778
DHYS_HUMAN	P49366	Deoxyhypusine synthase	DHPS	DHYS_HUMAN|P49366_K212	G-6599_DMSO_30min	0.0727362	0.327028	0.222416	19.218	0.826337	0.968923
DIAP1_HUMAN	O60610	Protein diaphanous homolog 1	DIAPH1	DIAP1_HUMAN|O60610_K503	G-6599_DMSO_30min	0.605641	0.509536	1.18861	17.1848	0.250758	0.757526
DIAP1_HUMAN	O60610	Protein diaphanous homolog 1	DIAPH1	DIAP1_HUMAN|O60610_K824	G-6599_DMSO_30min	0.0970368	0.313319	0.309706	18.8642	0.760179	0.955893
DIAP1_HUMAN	O60610	Protein diaphanous homolog 1	DIAPH1	DIAP1_HUMAN|O60610_K222	G-6599_DMSO_30min	-0.292644	0.261104	-1.1208	20.13	0.275569	0.775224
DIAP1_HUMAN	O60610	Protein diaphanous homolog 1	DIAPH1	DIAP1_HUMAN|O60610_K855	G-6599_DMSO_30min	-0.0739041	0.313064	-0.236067	18.8688	0.815924	0.966647
DIAP1_HUMAN	O60610	Protein diaphanous homolog 1	DIAPH1	DIAP1_HUMAN|O60610_K1239	G-6599_DMSO_30min	-0.112414	0.419507	-0.267966	17.6561	0.791831	0.962965
DIDO1_HUMAN	Q9BTC0	Death-inducer obliterator 1	DIDO1	DIDO1_HUMAN|Q9BTC0_K1072	G-6599_DMSO_30min	-0.218577	0.367601	-0.594605	17.7273	0.559621	0.892044
DIDO1_HUMAN	Q9BTC0	Death-inducer obliterator 1	DIDO1	DIDO1_HUMAN|Q9BTC0_K733	G-6599_DMSO_30min	-0.798582	0.258098	-3.0941	19.3917	0.00587056	0.461215
DIDO1_HUMAN	Q9BTC0	Death-inducer obliterator 1	DIDO1	DIDO1_HUMAN|Q9BTC0_K679	G-6599_DMSO_30min	-0.389225	0.252973	-1.5386	19.5313	0.139945	0.673346
DIM1_HUMAN	Q9UNQ2	Probable dimethyladenosine transferase	DIMT1	DIM1_HUMAN|Q9UNQ2_K96	G-6599_DMSO_30min	-0.28107	0.242336	-1.15984	21.9947	0.258551	0.760008
DIM1_HUMAN	Q9UNQ2	Probable dimethyladenosine transferase	DIMT1	DIM1_HUMAN|Q9UNQ2_K236	G-6599_DMSO_30min	-0.0207684	0.232657	-0.0892658	22.5371	0.929659	0.991061
DIM1_HUMAN	Q9UNQ2	Probable dimethyladenosine transferase	DIMT1	DIM1_HUMAN|Q9UNQ2_K288	G-6599_DMSO_30min	0.121816	0.257402	0.473252	21.2777	0.640853	0.922083
DIM1_HUMAN	Q9UNQ2	Probable dimethyladenosine transferase	DIMT1	DIM1_HUMAN|Q9UNQ2_K253	G-6599_DMSO_30min	-0.460433	0.306511	-1.50218	19.6795	0.148928	0.678507
DIP2A_HUMAN	Q14689	Disco-interacting protein 2 homolog A	DIP2A	DIP2A_HUMAN|Q14689_K376	G-6599_DMSO_30min	0.0173799	0.502674	0.0345748	16.7745	0.972827	0.996087
DIP2B_HUMAN	Q9P265	Disco-interacting protein 2 homolog B	DIP2B	DIP2B_HUMAN|Q9P265_K47	G-6599_DMSO_30min	0.175109	0.463568	0.377743	16.9498	0.71031	0.943045
DIP2B_HUMAN	Q9P265	Disco-interacting protein 2 homolog B	DIP2B	DIP2B_HUMAN|Q9P265_K1300	G-6599_DMSO_30min	-0.152267	0.264427	-0.575839	18.534	0.571651	0.896191
DIP2B_HUMAN	Q9P265	Disco-interacting protein 2 homolog B	DIP2B	DIP2B_HUMAN|Q9P265_K293	G-6599_DMSO_30min	-0.0288853	0.255991	-0.112837	18.6981	0.911362	0.989281
DISP1_HUMAN	Q96F81	Protein dispatched homolog 1	DISP1	DISP1_HUMAN|Q96F81_K256_K263	G-6599_DMSO_30min	-0.172324	0.456109	-0.377813	17.7604	0.710047	0.943045
DISP2_HUMAN	A7MBM2	Protein dispatched homolog 2	DISP2	DISP2_HUMAN|A7MBM2_K138	G-6599_DMSO_30min	-0.408856	0.268242	-1.5242	19.6174	0.143417	0.675564
DJB11_HUMAN	Q9UBS4	DnaJ homolog subfamily B member 11	DNAJB11	DJB11_HUMAN|Q9UBS4_K344	G-6599_DMSO_30min	-0.161624	0.29653	-0.545051	17.4782	0.592606	0.905892
DJB11_HUMAN	Q9UBS4	DnaJ homolog subfamily B member 11	DNAJB11	DJB11_HUMAN|Q9UBS4_K302	G-6599_DMSO_30min	0.163079	0.563064	0.289628	16.5683	0.775694	0.959521
DJB12_HUMAN	Q9NXW2	DnaJ homolog subfamily B member 12	DNAJB12	DJB12_HUMAN|Q9NXW2_K109	G-6599_DMSO_30min	-0.159668	0.411987	-0.387555	18.2019	0.70284	0.940668
DJB12_HUMAN	Q9NXW2	DnaJ homolog subfamily B member 12	DNAJB12	DJB12_HUMAN|Q9NXW2_K127	G-6599_DMSO_30min	-0.100438	0.309983	-0.324011	19.8479	0.749319	0.953836
DJB12_HUMAN	Q9NXW2	DnaJ homolog subfamily B member 12	DNAJB12	DJB12_HUMAN|Q9NXW2_K92	G-6599_DMSO_30min	-0.420008	0.311376	-1.34888	19.813	0.192593	0.710683
DJB12_HUMAN	Q9NXW2	DnaJ homolog subfamily B member 12	DNAJB12	DJB12_HUMAN|Q9NXW2_K177	G-6599_DMSO_30min	0.0433997	0.630619	0.0688208	17.0468	0.945933	0.992353
DJB14_HUMAN	Q8TBM8	DnaJ homolog subfamily B member 14	DNAJB14	DJB14_HUMAN|Q8TBM8_K105	G-6599_DMSO_30min	0.111482	0.38254	0.291425	18.0397	0.774051	0.959236
DJC11_HUMAN	Q9NVH1	DnaJ homolog subfamily C member 11	DNAJC11	DJC11_HUMAN|Q9NVH1_K264	G-6599_DMSO_30min	-0.179685	0.25711	-0.698866	24.2825	0.491276	0.868751
DJC13_HUMAN	O75165	DnaJ homolog subfamily C member 13	DNAJC13	DJC13_HUMAN|O75165_K693	G-6599_DMSO_30min	-0.241342	0.255815	-0.943423	18.948	0.35734	0.815854
DJC13_HUMAN	O75165	DnaJ homolog subfamily C member 13	DNAJC13	DJC13_HUMAN|O75165_K1335	G-6599_DMSO_30min	1.00208	0.507132	1.97598	16.8865	0.0647297	0.595573
DJC13_HUMAN	O75165	DnaJ homolog subfamily C member 13	DNAJC13	DJC13_HUMAN|O75165_K1144	G-6599_DMSO_30min	-0.0931621	0.227438	-0.409615	19.7291	0.686501	0.93739
DJC14_HUMAN	Q6Y2X3	DnaJ homolog subfamily C member 14	DNAJC14	DJC14_HUMAN|Q6Y2X3_K474	G-6599_DMSO_30min	-0.507973	0.251782	-2.01751	24.863	0.0545594	0.589224
DJC21_HUMAN	Q5F1R6	DnaJ homolog subfamily C member 21	DNAJC21	DJC21_HUMAN|Q5F1R6_K74	G-6599_DMSO_30min	-0.165595	0.431464	-0.383799	18.09	0.705601	0.941843
DJC30_HUMAN	Q96LL9	DnaJ homolog subfamily C member 30	DNAJC30	DJC30_HUMAN|Q96LL9_K66	G-6599_DMSO_30min	0.273885	0.364537	0.751324	19.2885	0.461527	0.857388
DKC1_HUMAN	O60832	H/ACA ribonucleoprotein complex subunit 4	DKC1	DKC1_HUMAN|O60832_K144	G-6599_DMSO_30min	-0.588881	0.232488	-2.53296	20.334	0.0196353	0.529953
DKC1_HUMAN	O60832	H/ACA ribonucleoprotein complex subunit 4	DKC1	DKC1_HUMAN|O60832_K39	G-6599_DMSO_30min	-0.172636	0.59134	-0.291941	16.8133	0.773903	0.959236
DKC1_HUMAN	O60832	H/ACA ribonucleoprotein complex subunit 4	DKC1	DKC1_HUMAN|O60832_K80	G-6599_DMSO_30min	2.69248	1.35182	1.99175	16.3411	0.0633831	0.595573
DKC1_HUMAN	O60832	H/ACA ribonucleoprotein complex subunit 4	DKC1	DKC1_HUMAN|O60832_K291	G-6599_DMSO_30min	-0.525471	0.243336	-2.15945	19.9466	0.0431719	0.559726
DKC1_HUMAN	O60832	H/ACA ribonucleoprotein complex subunit 4	DKC1	DKC1_HUMAN|O60832_K46	G-6599_DMSO_30min	-0.692236	0.27949	-2.47679	18.9884	0.0228354	0.53275
DLG1_HUMAN	Q12959	Disks large homolog 1	DLG1	DLG1_HUMAN|Q12959_K533	G-6599_DMSO_30min	-0.40668	0.266432	-1.52639	18.0899	0.144206	0.676395
DLG1_HUMAN	Q12959	Disks large homolog 1	DLG1	DLG1_HUMAN|Q12959_K644	G-6599_DMSO_30min	-0.00432508	0.383179	-0.0112874	17.1065	0.991125	0.997637
DLG1_HUMAN	Q12959	Disks large homolog 1	DLG1	DLG1_HUMAN|Q12959_K361	G-6599_DMSO_30min	-0.345767	0.276993	-1.24829	17.9445	0.227968	0.737615
DLG1_HUMAN	Q12959	Disks large homolog 1	DLG1	DLG1_HUMAN|Q12959_K291	G-6599_DMSO_30min	-0.249798	0.276525	-0.903347	17.9506	0.378305	0.823239
DLG1_HUMAN	Q12959	Disks large homolog 1	DLG1	DLG1_HUMAN|Q12959_K596	G-6599_DMSO_30min	-0.195385	0.237153	-0.823878	18.6076	0.420444	0.835864
DLG1_HUMAN	Q12959	Disks large homolog 1	DLG1	DLG1_HUMAN|Q12959_K452	G-6599_DMSO_30min	-0.231674	0.359074	-0.6452	17.2315	0.527296	0.886063
DLG1_HUMAN	Q12959	Disks large homolog 1	DLG1	DLG1_HUMAN|Q12959_K816	G-6599_DMSO_30min	0.166091	0.459365	0.361567	16.8356	0.722173	0.946728
DLG1_HUMAN	Q12959	Disks large homolog 1	DLG1	DLG1_HUMAN|Q12959_K556	G-6599_DMSO_30min	-0.295115	0.252733	-1.16769	18.3083	0.257913	0.759612
DLG4_HUMAN	P78352	Disks large homolog 4	DLG4	DLG4_HUMAN|P78352_K202	G-6599_DMSO_30min	-0.330162	0.31644	-1.04336	18.5336	0.310199	0.793805
DLG5_HUMAN	Q8TDM6	Disks large homolog 5	DLG5	DLG5_HUMAN|Q8TDM6_K772	G-6599_DMSO_30min	-0.210187	0.518661	-0.405248	17.4548	0.690219	0.938143
DLRB1_HUMAN	Q9NP97	Dynein light chain roadblock-type 1	DYNLRB1	DLRB1_HUMAN|Q9NP97_K52	G-6599_DMSO_30min	-0.44835	0.284595	-1.5754	17.6619	0.132907	0.667972
DLRB1_HUMAN	Q9NP97	Dynein light chain roadblock-type 1	DYNLRB1	DLRB1_HUMAN|Q9NP97_K15	G-6599_DMSO_30min	-0.726853	0.313519	-2.31837	17.4019	0.0328357	0.545928
[truncated: 16,390 more rows]
