# Supplementary material for: Rational design of potent small molecule SMARCA2/A4(BRM/BRG1) degraders acting via the recruitment of FBXO22
Source: Research Square preprint supplement (doi:10.21203/rs.3.rs-6033426/v1), 2025-03-10
Supplement: Supplementary file 3 [file 6b213b901427584e9441eeb5.xlsx]

## Sheet: +SMARCA2+G-6599
Residue	Observed Updake range	Sites	Pep-Start	Pep-Stop	Residue	Log10(PF)
6	0.05	4	4	9	6	0
7	0.05	4	4	9	7	0
8	0.05	4	4	9	8	0
9	0.05	4	4	9	9	0
0	0	0	0	0	10	0
11	0.23	10	9	21	11	0
12	0.23	10	9	21	12	0
13	0.23	10	9	21	13	0
14	0.23	10	9	21	14	0
15	0.23	10	9	21	15	0
16	0.23	10	9	21	16	0
17	0.23	10	9	21	17	0
18	0.23	10	9	21	18	0
19	0.23	10	9	21	19	0
20	0.23	10	9	21	20	0
21	0.23	10	9	21	21	0
22	3.51	14	10	26	22	0.184691
23	3.51	14	10	26	23	0.184691
24	1.73	5	22	28	24	0
25	1.73	5	22	28	25	0
26	1.73	5	22	28	26	0
27	1.73	5	22	28	27	0
28	1.73	5	22	28	28	0
29	0.66	4	27	32	29	0
30	0.66	4	27	32	30	0
31	0.66	4	27	32	31	0
32	0.66	4	27	32	32	0
33	0.2	6	27	34	33	0
34	0.4	4	32	37	34	0
35	0.4	4	32	37	35	0
36	0.4	4	32	37	36	0
37	0.4	4	32	37	37	0
38	1.44	5	33	40	38	0
39	1.55	4	37	42	39	0
40	1.55	4	37	42	40	0
41	1.55	4	37	42	41	0
42	1.55	4	37	42	42	0
43	2.19	6	35	43	43	0
44	3.07	7	35	44	44	0.0791812
45	0.55	4	43	48	45	0.071882
46	0.55	4	43	48	46	0.071882
47	0.55	4	43	48	47	0.071882
48	0.55	4	43	48	48	0.071882
0	0	0	0	0	49	0
0	0	0	0	0	50	0
0	0	0	0	0	51	0
0	0	0	0	0	52	0
0	0	0	0	0	53	0
54	0.94	5	52	58	54	0
55	0.94	5	52	58	55	0
56	0.94	5	52	58	56	0
57	0.94	5	52	58	57	0
58	0.94	5	52	58	58	0
59	1.55	5	57	63	59	0
60	1.55	5	57	63	60	0
61	1.07	4	59	64	61	0
62	1.07	4	59	64	62	0
63	1.07	4	59	64	63	0
64	1.07	4	59	64	64	0
65	1.03	5	59	65	65	0
66	2.13	7	59	67	66	0.0863598
67	2.13	7	59	67	67	0.0863598
68	2.74	8	59	68	68	0.164353
69	3.99	19	64	84	69	0
70	3.99	19	64	84	70	0
71	0.39	10	69	80	71	0
72	0.39	10	69	80	72	0
73	0.39	10	69	80	73	0
74	0.39	10	69	80	74	0
75	0.5	10	73	84	75	0
76	0.08	5	74	80	76	0
77	0.08	5	74	80	77	0
78	0.08	5	74	80	78	0
79	0.08	5	74	80	79	0
80	0.08	5	74	80	80	0
81	0.69	6	77	84	81	0
82	0.69	6	77	84	82	0
83	1.08	4	81	86	83	0
84	1.08	4	81	86	84	0
85	1.08	4	81	86	85	0
86	1.08	4	81	86	86	0
87	0.42	4	85	90	87	0
88	0.42	4	85	90	88	0
89	0.42	4	85	90	89	0
90	0.42	4	85	90	90	0
91	1.42	5	88	94	91	0
92	1.42	5	88	94	92	0
93	1.42	5	88	94	93	0
94	1.42	5	88	94	94	0
95	3.23	8	93	103	95	0.139879
96	2.6	7	94	103	96	0.127105
97	2.53	6	95	103	97	0.139879
98	2.53	6	95	103	98	0.139879
99	1.04	4	97	103	99	0.103804
100	1.04	4	97	103	100	0.103804
101	1.04	4	97	103	101	0.103804
102	1.04	4	97	103	102	0.103804
103	1.04	4	97	103	103	0.103804
104	2.6	7	95	104	104	0.143015
0	0.35	5	104	110	105	0.25042
106	0.35	5	104	110	106	0.25042
107	0.35	5	104	110	107	0.25042
108	0.35	5	104	110	108	0.25042
109	0.35	5	104	110	109	0.25042
110	0.35	5	104	110	110	0.25042
111	2.06	6	104	111	111	0.120574
0	0	0	0	0	112	0
0	0	0	0	0	113	0
0	0	0	0	0	114	0
0	0	0	0	0	115	0
0	0	0	0	0	116	0
0	0	0	0	0	117	0
0	0	0	0	0	118	0
0	0	0	0	0	119	0
0	0	0	0	0	120	0
0	0	0	0	0	121	0
0	0	0	0	0	122	0
0	0	0	0	0	123	0
0	0	0	0	0	124	0
0	0	0	0	0	125	0
0	0	0	0	0	126	0
0	0	0	0	0	127	0
0	0	0	0	0	128	0
129	0.33	4	127	132	129	0
130	0.33	4	127	132	130	0
131	0.33	4	127	132	131	0
132	0.33	4	127	132	132	0
0	0	0	0	0	133	0
0	0	0	0	0	134	0
135	4.57	11	133	146	135	0.103804
136	4.57	11	133	146	136	0.103804
137	4.57	11	133	146	137	0.103804
138	2.61	8	136	146	138	0.09691
139	2.61	8	136	146	139	0.09691
140	2.61	8	136	146	140	0.09691
141	1.28	6	139	146	141	0.269513
142	1.28	6	139	146	142	0.269513
143	1.28	6	139	146	143	0.269513
144	1.28	6	139	146	144	0.269513
145	1.28	6	139	146	145	0.269513
146	1.28	6	139	146	146	0.269513
147	2.65	9	136	147	147	0.338456
148	0.41	18	145	167	148	0
149	0.42	16	147	167	149	0
150	0.45	15	148	167	150	0
151	0.45	15	148	167	151	0
152	0.45	15	148	167	152	0
153	0.45	15	148	167	153	0
154	0.49	12	152	167	154	0
155	0.49	12	152	167	155	0
156	0.49	12	152	167	156	0
157	0.16	8	155	166	157	0
158	0.16	8	155	166	158	0
159	0.16	8	155	166	159	0
160	0.16	8	155	166	160	0
161	0.16	8	155	166	161	0
162	0.16	8	155	166	162	0
163	0.16	8	155	166	163	0
164	0.16	8	155	166	164	0
165	0.16	8	155	166	165	0
166	0.16	8	155	166	166	0
167	0.49	12	152	167	167	0
168	0.68	14	152	169	168	0
169	0.68	14	152	169	169	0
170	1.45	6	168	175	170	0
171	1.45	6	168	175	171	0
172	0.04	4	170	175	172	0
173	0.04	4	170	175	173	0
174	0.04	4	170	175	174	0
175	0.04	4	170	175	175	0
176	1.39	9	168	178	176	0
177	1.39	9	168	178	177	0
178	0.17	6	176	184	178	0
179	0.17	6	176	184	179	0
180	0.17	6	176	184	180	0
181	0.17	6	176	184	181	0
182	0.17	6	176	184	182	0
183	0.17	6	176	184	183	0
184	0.17	6	176	184	184	0
185	0.76	11	179	192	185	0.294466
186	0.76	11	179	192	186	0.294466
187	1.17	7	185	194	187	0.440909
188	1.17	7	185	194	188	0.440909
189	1.17	7	185	194	189	0.440909
190	1.17	7	185	194	190	0.440909
191	1.19	6	189	197	191	0
192	1.19	6	189	197	192	0
193	1.19	6	189	197	193	0
194	1.19	6	189	197	194	0
195	1.19	6	189	197	195	0
196	1.19	6	189	197	196	0
197	1.19	6	189	197	197	0
198	1.09	8	187	198	198	0
199	1.22	11	187	201	199	0.326336
200	1.22	11	187	201	200	0.326336
201	1.2	6	199	206	201	0.313867
202	1.2	6	199	206	202	0.313867
203	0.87	4	201	206	203	0.181844
204	0.87	4	201	206	204	0.181844
205	0.87	4	201	206	205	0.181844
206	0.87	4	201	206	206	0.181844
207	1.81	5	202	208	207	0.100371
208	1.81	5	202	208	208	0.100371
209	3.46	8	202	211	209	0.136721
210	3.46	8	202	211	210	0.136721
211	1.86	6	209	217	211	0.127105
212	1.86	6	209	217	212	0.127105
213	1.86	6	209	217	213	0.127105
214	1.86	6	209	217	214	0.127105
215	1.86	6	209	217	215	0.127105
216	1.86	6	209	217	216	0.127105
217	1.86	6	209	217	217	0.127105
218	3.01	10	207	219	218	0.255273
219	3.01	10	207	219	219	0.255273
220	0.43	7	218	226	220	0
221	0.43	7	218	226	221	0
222	0.43	7	218	226	222	0
223	0.43	7	218	226	223	0
224	0.32	6	222	229	224	0
225	0.32	6	222	229	225	0
226	0.32	6	222	229	226	0
227	0.32	6	222	229	227	0
228	0.32	6	222	229	228	0
229	0.32	6	222	229	229	0
230	0.07	6	228	235	230	0
231	0.05	5	229	235	231	0
232	0.05	5	229	235	232	0
233	0.05	5	229	235	233	0
234	0.05	5	229	235	234	0
235	0.05	5	229	235	235	0
236	3.78	14	228	243	236	0
237	3.25	6	235	242	237	0.181844
238	2.93	5	236	242	238	0.201397
239	2.93	5	236	242	239	0.201397
240	2.93	5	236	242	240	0.201397
241	2.93	5	236	242	241	0.201397
242	2.93	5	236	242	242	0.201397
243	1.28	6	239	246	243	0.230449
244	1.28	6	239	246	244	0.230449
245	1.28	6	239	246	245	0.230449
246	1.28	6	239	246	246	0.230449
0	0	0	0	0	247	0
0	0	0	0	0	248	0
249	0.63	10	247	258	249	0
250	0.56	9	248	258	250	0
251	0.56	9	248	258	251	0
252	0.11	7	250	258	252	0
253	0.11	7	250	258	253	0
254	0.11	7	250	258	254	0
255	0.11	7	250	258	255	0
256	0.11	7	250	258	256	0
257	0.11	7	250	258	257	0
258	0.11	7	250	258	258	0
0	0	0	0	0	259	0
0	0	0	0	0	260	0
261	3.22	17	259	278	261	0.201397
262	3.22	17	259	278	262	0.201397
263	3.22	17	259	278	263	0.201397
264	0.92	7	262	271	264	0.1607
265	0.92	7	262	271	265	0.1607
266	0.92	7	262	271	266	0.1607
267	0.92	7	262	271	267	0.1607
268	0.92	7	262	271	268	0.1607
269	0.92	7	262	271	269	0.1607
270	0.92	7	262	271	270	0.1607
271	0.92	7	262	271	271	0.1607
272	0.17	7	266	278	272	0
273	0.17	7	266	278	273	0
274	0.17	7	266	278	274	0
275	0.17	7	266	278	275	0
276	0.17	7	266	278	276	0
277	0.17	7	266	278	277	0
278	0.17	7	266	278	278	0
279	1.54	14	266	278	279	0
280	1.54	14	276	291	280	0
281	0.73	6	279	286	281	0
282	0.73	6	279	286	282	0
283	0.73	6	279	286	283	0
284	0.73	6	279	286	284	0
285	0.73	6	279	286	285	0
286	0.73	6	279	286	286	0
287	0.21	5	285	291	287	0
288	0.21	5	285	291	288	0
289	0.21	5	285	291	289	0
290	0.21	5	285	291	290	0
291	0.21	5	285	291	291	0
0	0	0	0	0	292	0
0	0	0	0	0	293	0
294	4.04	11	292	304	294	0
295	3.3	9	293	303	295	0
296	3.3	9	293	303	296	0
297	2.46	7	295	303	297	0
298	2.46	7	295	303	298	0
299	2.46	7	295	303	299	0
300	2.46	7	295	303	300	0
301	2.46	7	295	303	301	0
302	2.46	7	295	303	302	0
303	2.46	7	295	303	303	0
304	3.41	9	296	306	304	0.164353
305	3.41	9	296	306	305	0.164353
306	3.41	9	296	306	306	0.164353
307	2.27	16	305	323	307	0.419956
308	2.27	16	305	323	308	0.419956
309	1.2	5	307	313	309	0
310	1.2	5	307	313	310	0
311	1.2	5	307	313	311	0
312	1.2	5	307	313	312	0
313	1.2	5	307	313	313	0
314	1.99	9	311	322	314	0
315	1.99	9	311	322	315	0
316	1.99	9	311	322	316	0
317	1.99	9	311	322	317	0
318	1.99	9	311	322	318	0
319	1.99	9	311	322	319	0
320	1.99	9	311	322	320	0
321	1.99	9	311	322	321	0
322	1.99	9	311	322	322	0
323	1.17	9	312	323	323	0
0	0	0	0	0	324	0
0	0	0	0	0	325	0
326	3.53	8	324	333	326	0.1959
327	3.53	8	324	333	327	0.1959
328	3.53	8	324	333	328	0.1959
329	2.96	5	327	333	329	0.09691
330	2.74	4	328	333	330	0.103804
331	2.74	4	328	333	331	0.103804
332	2.74	4	328	333	332	0.103804
333	2.74	4	328	333	333	0.103804
334	2.46	6	332	339	334	0
335	2.46	6	332	339	335	0
336	2.46	6	332	339	336	0
337	2.46	6	332	339	337	0
338	2.46	6	332	339	338	0
339	2.46	6	332	339	339	0
340	0.16	5	338	344	340	0
341	0.16	5	338	344	341	0
342	0.16	5	338	344	342	0
343	0.16	5	338	344	343	0
344	0.16	5	338	344	344	0
0	0	0	0	0	345	0
0	0	0	0	0	346	0
347	0.75	7	345	355	347	0.173186
348	0.75	7	345	355	348	0.173186
349	0.75	7	345	355	349	0.173186
350	0.75	7	345	355	350	0.173186
351	0.75	7	345	355	351	0.173186
352	0.75	7	345	355	352	0.173186
353	0.23	4	351	357	353	0
354	0.23	4	351	357	354	0
355	0.23	4	351	357	355	0
356	0.23	4	351	357	356	0
357	0.23	4	351	357	357	0
358	0.57	9	356	366	358	0
359	1.53	7	357	365	359	0
360	1.58	7	358	366	360	0.158362
361	1.58	7	358	366	361	0.158362
362	1.58	7	358	366	362	0.158362
363	1.58	7	358	366	363	0.158362
364	1.58	7	358	366	364	0.158362
365	1.58	7	358	366	365	0.158362
366	1.58	7	358	366	366	0.158362
367	1.73	8	358	367	367	0
368	0.9	6	366	373	368	0.262451
369	0.77	4	367	372	369	0.212188
370	0.77	4	367	372	370	0.212188
371	0.77	4	367	372	371	0.212188
372	0.77	4	367	372	372	0.212188
373	0.67	5	367	373	373	0.453318
374	0.67	5	367	373	374	0.453318
375	0.09	4	373	378	375	0
376	0.09	4	373	378	376	0
377	0.09	4	373	378	377	0
378	0.09	4	373	378	378	0
379	0.24	6	373	380	379	0
380	0.24	6	373	380	380	0
381	0.22	8	374	383	381	0
382	0.22	8	374	383	382	0
383	0.9	4	381	386	383	0.252853
384	0.9	4	381	386	384	0.252853
385	0.9	4	381	386	385	0.252853
386	0.9	4	381	386	386	0.252853
387	0.96	4	385	390	387	0.133539
388	0.96	4	385	390	388	0.133539
389	0.96	4	385	390	389	0.133539
390	0.96	4	385	390	390	0.133539
391	0.3	5	387	393	391	0
392	0.3	5	387	393	392	0
393	0.3	5	387	393	393	0
394	0.63	12	381	394	394	0
395	2.96	23	379	403	395	0.212188
396	2.96	23	379	403	396	0.212188
397	1.22	7	395	403	397	0.155336
398	1.14	6	396	403	398	0.181844
399	1.2	5	397	403	399	0.143015
400	1.2	5	397	403	400	0.143015
401	1.2	5	397	403	401	0.143015
402	1.2	5	397	403	402	0.143015
403	1.2	5	397	403	403	0.143015

## Sheet: SMARCA2+G-6599
Peptide	Range	Sites	Residue	Log10(PF)	Log10(PF, +Error)	Log10(PF, -Error)	Notes
9-21	0.23	10	11	0	0	0
9-21	0.23	10	12	0	0	0
9-21	0.23	10	13	0	0	0
9-21	0.23	10	14	0	0	0
9-21	0.23	10	15	0	0	0
9-21	0.23	10	16	0	0	0
9-21	0.23	10	17	0	0	0
9-21	0.23	10	18	0	0	0
9-21	0.23	10	19	0	0	0
9-21	0.23	10	20	0	0	0
9-21	0.23	10	21	0	0	0
10-26	3.51	14	22	0.184691	0.104728	0.126848
10-26	3.51	14	23	0.184691	0.104728	0.126848
22-28	1.73	5	24	-0.091515	0.0673919	0.0765685
22-28	1.73	5	25	-0.091515	0.0673919	0.0765685
22-28	1.73	5	26	-0.091515	0.0673919	0.0765685
22-28	1.73	5	27	-0.091515	0.0673919	0.0765685
22-28	1.73	5	28	-0.091515	0.0673919	0.0765685
27-32	0.66	4	29	0.136721	0.0767664	0.0698623
27-32	0.66	4	30	0.136721	0.0767664	0.0698623
27-32	0.66	4	31	0.136721	0.0767664	0.0698623
27-32	0.66	4	32	0.136721	0.0767664	0.0698623
27-34	0.2	6	33	0.680336	0.334698	0.246193
32-37	0.4	4	34	0	0	0
32-37	0.4	4	35	0	0	0
32-37	0.4	4	36	0	0	0
32-37	0.4	4	37	0	0	0
33-40	1.44	5	38	0	0	0
37-42	1.55	4	39	0	0	0
37-42	1.55	4	40	0	0	0
37-42	1.55	4	41	0	0	0
37-42	1.55	4	42	0	0	0
35-43	2.19	6	43	0	0	0
35-44	3.07	7	44	0.143015	0.033952	0.0311695
43-48	0.55	4	45	0	0	0
43-48	0.55	4	46	0	0	0
43-48	0.55	4	47	0	0	0
43-48	0.55	4	48	0	0	0
0-0	0	0	49	0	0	0
0-0	0	0	50	0	0	0
0-0	0	0	51	0	0	0
0-0	0	0	52	0	0	0
0-0	0	0	53	0	0	0
52-58	0.94	5	54	0.161368	0.0812342	0.0715346
52-58	0.94	5	55	0.161368	0.0812342	0.0715346
52-58	0.94	5	56	0.161368	0.0812342	0.0715346
52-58	0.94	5	57	0.161368	0.0812342	0.0715346
52-58	0.94	5	58	0.161368	0.0812342	0.0715346
55-84	6.32	28	59	0.127105	0.109414	0.110479
55-84	6.32	28	60	0.127105	0.109414	0.110479
59-64	1.07	4	61	0	0	0
59-64	1.07	4	62	0	0	0
59-64	1.07	4	63	0	0	0
59-64	1.07	4	64	0	0	0
59-65	1.03	5	65	0	0	0
59-67	2.13	7	66	0	0	0
59-67	2.13	7	67	0	0	0
59-68	2.74	8	68	0.164353	0.0797527	0.0794855
64-84	3.99	19	69	0	0	0
64-84	3.99	19	70	0	0	0
69-80	0.39	10	71	-0.236572	0.232556	0.221037
69-80	0.39	10	72	-0.236572	0.232556	0.221037
69-80	0.39	10	73	-0.236572	0.232556	0.221037
69-80	0.39	10	74	-0.236572	0.232556	0.221037
73-84	0.5	10	75	0.764923	0.329462	0.348313
74-80	0.08	5	76	0	0	0
74-80	0.08	5	77	0	0	0
74-80	0.08	5	78	0	0	0
74-80	0.08	5	79	0	0	0
74-80	0.08	5	80	0	0	0
77-84	0.69	6	81	0.271842	0.253064	0.23264
77-84	0.69	6	82	0.271842	0.253064	0.23264
81-86	1.08	4	83	0.173186	0.0699431	0.0955068
81-86	1.08	4	84	0.173186	0.0699431	0.0955068
81-86	1.08	4	85	0.173186	0.0699431	0.0955068
81-86	1.08	4	86	0.173186	0.0699431	0.0955068
85-90	0.42	4	87	0	0	0
85-90	0.42	4	88	0	0	0
85-90	0.42	4	89	0	0	0
85-90	0.42	4	90	0	0	0
85-91	0.42	5	91	-0.05061	0.0452423	0.0967076
85-94	1.68	8	92	0	0	0
85-94	1.68	8	93	0	0	0
85-94	1.68	8	94	0	0	0
93-103	3.23	8	95	0.139879	0.0463921	0.0489693
94-103	2.6	7	96	0.127105	0.0425393	0.0468835
95-103	2.53	6	97	0.139879	0.0369083	0.0369797
95-103	2.53	6	98	0.139879	0.0369083	0.0369797
97-103	1.04	4	99	0.103804	0.0366683	0.0364934
97-103	1.04	4	100	0.103804	0.0366683	0.0364934
97-103	1.04	4	101	0.103804	0.0366683	0.0364934
97-103	1.04	4	102	0.103804	0.0366683	0.0364934
97-103	1.04	4	103	0.103804	0.0366683	0.0364934
95-104	2.6	7	104	0.143015	0.0418786	0.0452686
0-0	0	0	105	0	0	0
104-110	0.35	5	106	0.25042	0.0619277	0.062255
104-110	0.35	5	107	0.25042	0.0619277	0.062255
104-110	0.35	5	108	0.25042	0.0619277	0.062255
104-110	0.35	5	109	0.25042	0.0619277	0.062255
104-110	0.35	5	110	0.25042	0.0619277	0.062255
104-111	2.06	6	111	0.120574	0.041958	0.0455714
0-0	0	0	112	0	0	0
0-0	0	0	113	0	0	0
0-0	0	0	114	0	0	0
0-0	0	0	115	0	0	0
0-0	0	0	116	0	0	0
0-0	0	0	117	0	0	0
0-0	0	0	118	0	0	0
0-0	0	0	119	0	0	0
0-0	0	0	120	0	0	0
0-0	0	0	121	0	0	0
0-0	0	0	122	0	0	0
0-0	0	0	123	0	0	0
0-0	0	0	124	0	0	0
0-0	0	0	125	0	0	0
0-0	0	0	126	0	0	0
0-0	0	0	127	0	0	0
0-0	0	0	128	0	0	0
127-132	0.33	4	129	0	0	0
127-132	0.33	4	130	0	0	0
127-132	0.33	4	131	0	0	0
127-132	0.33	4	132	0	0	0
0-0	0	0	133	0	0	0
0-0	0	0	134	0	0	0
133-146	4.57	11	135	0.103804	0.0420799	0.0431183
133-146	4.57	11	136	0.103804	0.0420799	0.0431183
133-146	4.57	11	137	0.103804	0.0420799	0.0431183
136-146	2.61	8	138	0.09691	0.0601363	0.0624081
136-146	2.61	8	139	0.09691	0.0601363	0.0624081
136-146	2.61	8	140	0.09691	0.0601363	0.0624081
139-146	1.28	6	141	0.269513	0.0763726	0.0829241
139-146	1.28	6	142	0.269513	0.0763726	0.0829241
139-146	1.28	6	143	0.269513	0.0763726	0.0829241
139-146	1.28	6	144	0.269513	0.0763726	0.0829241
139-146	1.28	6	145	0.269513	0.0763726	0.0829241
139-146	1.28	6	146	0.269513	0.0763726	0.0829241
136-147	2.65	9	147	0.338456	0.0250002	0.0694877
145-167	0.41	18	148	0	0	0
147-167	0.42	16	149	0	0	0
148-167	0.45	15	150	0	0	0
148-167	0.45	15	151	0	0	0
148-167	0.45	15	152	0	0	0
148-167	0.45	15	153	0	0	0
152-167	0.49	12	154	0	0	0
152-167	0.49	12	155	0	0	0
152-167	0.49	12	156	0	0	0
155-166	0.16	8	157	0	0	0
155-166	0.16	8	158	0	0	0
155-166	0.16	8	159	0	0	0
155-166	0.16	8	160	0	0	0
155-166	0.16	8	161	0	0	0
155-166	0.16	8	162	0	0	0
155-166	0.16	8	163	0	0	0
155-166	0.16	8	164	0	0	0
155-166	0.16	8	165	0	0	0
155-166	0.16	8	166	0	0	0
152-167	0.49	12	167	0	0	0
152-169	0.68	14	168	0	0	0
152-169	0.68	14	169	0	0	0
168-175	1.45	6	170	0.100371	0.0701257	0.0686396
168-175	1.45	6	171	0.100371	0.0701257	0.0686396
170-175	0.04	4	172	0	0	0
170-175	0.04	4	173	0	0	0
170-175	0.04	4	174	0	0	0
170-175	0.04	4	175	0	0	0
168-178	1.39	9	176	0	0	0
168-178	1.39	9	177	0	0	0
176-184	0.17	6	178	0	0	0
176-184	0.17	6	179	0	0	0
176-184	0.17	6	180	0	0	0
176-184	0.17	6	181	0	0	0
176-184	0.17	6	182	0	0	0
176-184	0.17	6	183	0	0	0
176-184	0.17	6	184	0	0	0
179-188	0.4	8	185	0	0	0	Empirical method is very sensitive to flat curves, PF was not correct by manual inspection
179-188	0.4	8	186	0	0	0	Empirical method is very sensitive to flat curves, PF was not correct by manual inspection
185-194	1.17	7	187	0.440909	0.128231	0.117307
185-194	1.17	7	188	0.440909	0.128231	0.117307
185-194	1.17	7	189	0.440909	0.128231	0.117307
185-194	1.17	7	190	0.440909	0.128231	0.117307
189-197	1.19	6	191	0	0	0
189-197	1.19	6	192	0	0	0
189-197	1.19	6	193	0	0	0
189-197	1.19	6	194	0	0	0
189-197	1.19	6	195	0	0	0
189-197	1.19	6	196	0	0	0
189-197	1.19	6	197	0	0	0
187-198	1.09	8	198	0	0	0
187-201	1.22	11	199	0.326336	0.118454	0.117458
187-201	1.22	11	200	0.326336	0.118454	0.117458
199-206	1.2	6	201	0.313867	0.155109	0.137979
199-206	1.2	6	202	0.313867	0.155109	0.137979
201-206	0.87	4	203	0.181844	0.159695	0.160607
201-206	0.87	4	204	0.181844	0.159695	0.160607
201-206	0.87	4	205	0.181844	0.159695	0.160607
201-206	0.87	4	206	0.181844	0.159695	0.160607
202-208	1.81	5	207	0.100371	0.0667749	0.0841125
202-208	1.81	5	208	0.100371	0.0667749	0.0841125
202-211	3.46	8	209	0.136721	0.0449221	0.0467997
202-211	3.46	8	210	0.136721	0.0449221	0.0467997
209-217	1.86	6	211	0	0	0
209-217	1.86	6	212	0	0	0
209-217	1.86	6	213	0	0	0
209-217	1.86	6	214	0	0	0
209-217	1.86	6	215	0	0	0
209-217	1.86	6	216	0	0	0
209-217	1.86	6	217	0	0	0
207-219	3.01	10	218	0.255273	0.0783631	0.0755434
207-219	3.01	10	219	0.255273	0.0783631	0.0755434
218-226	0.43	7	220	0	0	0
218-226	0.43	7	221	0	0	0
218-226	0.43	7	222	0	0	0
218-226	0.43	7	223	0	0	0
218-226	0.43	7	224	0	0	0
218-226	0.43	7	225	0	0	0
218-226	0.43	7	226	0	0	0
222-229	0.32	6	227	0	0	0
222-229	0.32	6	228	0	0	0
222-229	0.32	6	229	0	0	0
228-235	0.07	6	230	0	0	0	228-235 had a missing datapoint that caused a flawed analysis.
229-235	0.05	5	231	0	0	0
229-235	0.05	5	232	0	0	0
229-235	0.05	5	233	0	0	0
229-235	0.05	5	234	0	0	0
229-235	0.05	5	235	0	0	0
228-243	3.78	14	236	0.187521	0.103803	0.104808
235-242	3.25	6	237	0.181844	0.0611625	0.0806898
236-242	2.93	5	238	0.201397	0.0567092	0.0576183
236-242	2.93	5	239	0.201397	0.0567092	0.0576183
236-242	2.93	5	240	0.201397	0.0567092	0.0576183
236-242	2.93	5	241	0.201397	0.0567092	0.0576183
236-242	2.93	5	242	0.201397	0.0567092	0.0576183
239-246	1.28	6	243	0.230449	0.0605537	0.0740535
239-246	1.28	6	244	0.230449	0.0605537	0.0740535
239-246	1.28	6	245	0.230449	0.0605537	0.0740535
239-246	1.28	6	246	0.230449	0.0605537	0.0740535
0-0	0	0	247	0	0	0
0-0	0	0	248	0	0	0
247-258	0.63	10	249	0.201397	0.060983	0.104028
248-258	0.56	9	250	0	0	0
248-258	0.56	9	251	0	0	0
250-258	0.11	7	252	0	0	0
250-258	0.11	7	253	0	0	0
250-258	0.11	7	254	0	0	0
250-258	0.11	7	255	0	0	0
250-258	0.11	7	256	0	0	0
250-258	0.11	7	257	0	0	0
250-258	0.11	7	258	0	0	0
0-0	0	0	259	0	0	0
0-0	0	0	260	0	0	0
259-277	3.25	16	261	0	0	0
259-277	3.25	16	262	0	0	0
259-277	3.25	16	263	0	0	0
262-271	0.92	7	264	0.135759	0.0345027	0.063963
262-271	0.92	7	265	0.135759	0.0345027	0.063963
262-271	0.92	7	266	0.135759	0.0345027	0.063963
262-271	0.92	7	267	0.135759	0.0345027	0.063963
262-271	0.92	7	268	0.135759	0.0345027	0.063963
262-271	0.92	7	269	0.135759	0.0345027	0.063963
262-271	0.92	7	270	0.135759	0.0345027	0.063963
262-271	0.92	7	271	0.135759	0.0345027	0.063963
266-278	2.07	11	272	0	0	0
266-278	2.07	11	273	0	0	0
266-278	2.07	11	274	0	0	0
266-278	2.07	11	275	0	0	0
266-278	2.07	11	276	0	0	0
266-278	2.07	11	277	0	0	0
266-278	2.07	11	278	0	0	0
276-291	1.54	14	279	0	0	0
276-291	1.54	14	280	0	0	0
279-286	0.73	6	281	0.32838	0.124763	0.0806107
279-286	0.73	6	282	0.32838	0.124763	0.0806107
279-286	0.73	6	283	0.32838	0.124763	0.0806107
279-286	0.73	6	284	0.32838	0.124763	0.0806107
279-286	0.73	6	285	0.32838	0.124763	0.0806107
279-286	0.73	6	286	0.32838	0.124763	0.0806107
285-291	0.21	5	287	0	0	0
285-291	0.21	5	288	0	0	0
285-291	0.21	5	289	0	0	0
285-291	0.21	5	290	0	0	0
285-291	0.21	5	291	0	0	0
0-0	0	0	292	0	0	0
0-0	0	0	293	0	0	0
292-304	4.04	11	294	0.100371	0.0883266	0.0962699
293-303	3.3	9	295	0	0	0
293-303	3.3	9	296	0	0	0
295-303	2.46	7	297	0	0	0
295-303	2.46	7	298	0	0	0
295-303	2.46	7	299	0	0	0
295-303	2.46	7	300	0	0	0
295-303	2.46	7	301	0	0	0
295-303	2.46	7	302	0	0	0
295-303	2.46	7	303	0	0	0
296-306	3.41	9	304	0.164353	0.0660159	0.062755
296-306	3.41	9	305	0.164353	0.0660159	0.062755
296-306	3.41	9	306	0.164353	0.0660159	0.062755
305-323	2.27	16	307	0.419956	0.0903988	0.0984022
305-323	2.27	16	308	0.419956	0.0903988	0.0984022
307-313	1.2	5	309	0.0934217	0.0468212	0.0504138
307-313	1.2	5	310	0.0934217	0.0468212	0.0504138
307-313	1.2	5	311	0.0934217	0.0468212	0.0504138
307-313	1.2	5	312	0.0934217	0.0468212	0.0504138
307-313	1.2	5	313	0.0934217	0.0468212	0.0504138
311-322	1.99	9	314	0	0	0
311-322	1.99	9	315	0	0	0
311-322	1.99	9	316	0	0	0
311-322	1.99	9	317	0	0	0
311-322	1.99	9	318	0	0	0
311-322	1.99	9	319	0	0	0
311-322	1.99	9	320	0	0	0
311-322	1.99	9	321	0	0	0
311-322	1.99	9	322	0	0	0
312-323	1.17	9	323	0.401401	0.093921	0.0993175
0-0	0	0	324	0	0	0
0-0	0	0	325	0	0	0
324-333	3.53	8	326	0.1959	0.0628588	0.0664623
324-333	3.53	8	327	0.1959	0.0628588	0.0664623
324-333	3.53	8	328	0.1959	0.0628588	0.0664623
327-333	2.96	5	329	0.09691	0.0976971	0.0822045
328-333	2.74	4	330	0.103804	0.0971954	0.0917297
328-333	2.74	4	331	0.103804	0.0971954	0.0917297
328-333	2.74	4	332	0.103804	0.0971954	0.0917297
328-333	2.74	4	333	0.103804	0.0971954	0.0917297
332-339	2.46	6	334	0	0	0
332-339	2.46	6	335	0	0	0
332-339	2.46	6	336	0	0	0
332-339	2.46	6	337	0	0	0
332-339	2.46	6	338	0	0	0
332-339	2.46	6	339	0	0	0
338-344	0.16	5	340	0	0	0	338-344 disagrees with overlapping peptides
338-344	0.16	5	341	0	0	0	338-344 disagrees with overlapping peptides
338-344	0.16	5	342	0	0	0	338-344 disagrees with overlapping peptides
338-344	0.16	5	343	0	0	0	338-344 disagrees with overlapping peptides
338-344	0.16	5	344	0	0	0	338-344 disagrees with overlapping peptides
0-0	0	0	345	0	0	0
0-0	0	0	346	0	0	0
345-355	0.75	7	347	0.173186	0.0711703	0.0751091
345-355	0.75	7	348	0.173186	0.0711703	0.0751091
345-355	0.75	7	349	0.173186	0.0711703	0.0751091
345-355	0.75	7	350	0.173186	0.0711703	0.0751091
345-355	0.75	7	351	0.173186	0.0711703	0.0751091
345-355	0.75	7	352	0.173186	0.0711703	0.0751091
351-357	0.23	4	353	0.292256	0.713771	0.17314
351-357	0.23	4	354	0.292256	0.713771	0.17314
351-357	0.23	4	355	0.292256	0.713771	0.17314
351-357	0.23	4	356	0.292256	0.713771	0.17314
351-357	0.23	4	357	0.292256	0.713771	0.17314
356-366	0.57	9	358	0.152288	0.0923251	0.106412
357-365	1.53	7	359	0.149846	0.026245	0.0374843
358-365	1.41	6	360	-0.21467	0.055161	0.0514342
358-365	1.41	6	361	-0.21467	0.055161	0.0514342
358-365	1.41	6	362	-0.21467	0.055161	0.0514342
358-365	1.41	6	363	-0.21467	0.055161	0.0514342
358-365	1.41	6	364	-0.21467	0.055161	0.0514342
358-365	1.41	6	365	-0.21467	0.055161	0.0514342
358-366	1.58	7	366	0.158362	0.0485819	0.0454753
358-367	1.73	8	367	0	0	0
366-373	0.9	6	368	0	0	0
367-372	0.77	4	369	0.212188	0.141651	0.124883
367-372	0.77	4	370	0.212188	0.141651	0.124883
367-372	0.77	4	371	0.212188	0.141651	0.124883
367-372	0.77	4	372	0.212188	0.141651	0.124883
367-373	0.67	5	373	0.453318	0.187606	0.248212
367-375	0.51	7	374	0.71433	0.233559	0.301794
367-375	0.51	7	375	0.71433	0.233559	0.301794
374-383	0.22	8	376	0	0	0
374-383	0.22	8	377	0	0	0
374-383	0.22	8	378	0	0	0
374-383	0.22	8	379	0	0	0
374-383	0.22	8	380	0	0	0
374-383	0.22	8	381	0	0	0
374-383	0.22	8	382	0	0	0
374-383	0.22	8	383	0	0	0
381-394	0.63	12	384	0.64836	0.252401	0.243559
381-394	0.63	12	385	0.64836	0.252401	0.243559
381-394	0.63	12	386	0.64836	0.252401	0.243559
385-390	0.96	4	387	0.133539	0.0867537	0.0839534
385-390	0.96	4	388	0.133539	0.0867537	0.0839534
385-390	0.96	4	389	0.133539	0.0867537	0.0839534
385-390	0.96	4	390	0.133539	0.0867537	0.0839534
385-393	0.85	7	391	0	0	0
385-393	0.85	7	392	0	0	0
385-393	0.85	7	393	0	0	0
381-394	0.63	12	394	0.64836	0.252401	0.243559
379-403	2.96	23	395	0.212188	0.109086	0.121058
379-403	2.96	23	396	0.212188	0.109086	0.121058
395-403	1.22	7	397	0.155336	0.0666442	0.0715915
395-403	1.22	7	398	0.155336	0.0666442	0.0715915
397-403	1.2	5	399	0.143015	0.0786577	0.0892903
397-403	1.2	5	400	0.143015	0.0786577	0.0892903
397-403	1.2	5	401	0.143015	0.0786577	0.0892903
397-403	1.2	5	402	0.143015	0.0786577	0.0892903
397-403	1.2	5	403	0.143015	0.0786577	0.0892903

## Sheet: SMARCA2
Peptide	Range	Sites	Residue	Log10(PF)	Log10(PF, +Error)	Log10(PF, -Error)	Note
8-20	0.89	10	10	0.117271	0.0441384	0.0458541
8-20	0.89	10	11	0.117271	0.0441384	0.0458541
8-20	0.89	10	12	0.117271	0.0441384	0.0458541
8-20	0.89	10	13	0.117271	0.0441384	0.0458541
12-23	0.13	9	14	0	0	0
12-23	0.13	9	15	0	0	0
12-23	0.13	9	16	0	0	0
12-23	0.13	9	17	0	0	0
12-23	0.13	9	18	0	0	0
12-23	0.13	9	19	0	0	0
12-23	0.13	9	20	0	0	0
12-23	0.13	9	21	0	0	0
12-23	0.13	9	22	0	0	0
12-23	0.13	9	23	0	0	0
22-28	0.31	5	24	0	0	0
22-28	0.31	5	25	0	0	0	Inconsistent with overlapping peptides, not confirmable.
22-28	0.31	5	26	0	0	0	Inconsistent with overlapping peptides, not confirmable.
22-28	0.31	5	27	0	0	0	Inconsistent with overlapping peptides, not confirmable.
22-28	0.31	5	28	0	0	0	Inconsistent with overlapping peptides, not confirmable.
27-37	0.71	9	29	-0.229148	0.0408495	0.0455309
27-37	0.71	9	30	-0.229148	0.0408495	0.0455309
29-37	0.31	7	31	0.158362	0.0401303	0.0484389
29-37	0.31	7	32	0.158362	0.0401303	0.0484389
29-37	0.31	7	33	0.158362	0.0401303	0.0484389
32-37	0.32	4	34	0.075547	0.0366867	0.0420287
32-37	0.32	4	35	0.075547	0.0366867	0.0420287
32-37	0.32	4	36	0.075547	0.0366867	0.0420287
32-37	0.32	4	37	0.075547	0.0366867	0.0420287
35-43	1.11	6	38	-0.0132283	0.0131622	0.00975985
37-43	0.91	5	39	0	0	0
37-43	0.91	5	40	0	0	0
37-43	0.91	5	41	0	0	0
37-43	0.91	5	42	0	0	0
41-46	0.56	4	43	0.143015	0.0310071	0.0402835
41-46	0.56	4	44	0.143015	0.0310071	0.0402835
41-46	0.56	4	45	0.143015	0.0310071	0.0402835
41-46	0.56	4	46	0.143015	0.0310071	0.0402835
43-48	0.36	4	47	0.10721	0.0382382	0.0392413
43-48	0.36	4	48	0.10721	0.0382382	0.0392413
0-0	0	0	49	0	0	0
0-0	0	0	50	0	0	0
0-0	0	0	51	0	0	0
0-0	0	0	52	0	0	0
51-56	0.06	4	53	0	0	0
51-56	0.06	4	54	0	0	0
51-56	0.06	4	55	0	0	0
51-56	0.06	4	56	0	0	0
55-61	1.18	5	57	0.0413927	0.0225239	0.0189097
56-61	0.74	4	58	0.0827854	0.0694732	0.0639605
56-61	0.74	4	59	0.0827854	0.0694732	0.0639605
56-61	0.74	4	60	0.0827854	0.0694732	0.0639605
56-61	0.74	4	61	0.0827854	0.0694732	0.0639605
58-65	0.48	6	62	0.161368	0.0866918	0.0871856
58-65	0.48	6	63	0.161368	0.0866918	0.0871856
58-65	0.48	6	64	0.161368	0.0866918	0.0871856
58-65	0.48	6	65	0.161368	0.0866918	0.0871856
62-70	1.02	7	66	0.0827854	0.0754047	0.0765912
62-70	1.02	7	67	0.0827854	0.0754047	0.0765912
66-73	1	6	68	0	0	0
66-73	1	6	69	0	0	0
66-73	1	6	70	0	0	0
66-73	1	6	71	0	0	0
66-73	1	6	72	0	0	0
66-73	1	6	73	0	0	0
68-84	0.95	15	74	0.220108	0.155782	0.168202
68-84	0.95	15	75	0.220108	0.155782	0.168202
74-86	0.39	11	76	0	0	0
74-86	0.39	11	77	0	0	0
74-86	0.39	11	78	0	0	0
74-86	0.39	11	79	0	0	0
74-86	0.39	11	80	0	0	0
74-86	0.39	11	81	0	0	0
74-86	0.39	11	82	0	0	0
74-86	0.39	11	83	0	0	0
74-86	0.39	11	84	0	0	0
83-92	1.03	8	85	0.064458	0.0635309	0.0634417
84-91	0.21	6	86	0.193125	0.0136823	0.0114697
85-90	0.31	4	87	0.049218	0.0313827	0.028984
85-90	0.31	4	88	0.049218	0.0313827	0.028984
85-90	0.31	4	89	0.049218	0.0313827	0.028984
85-90	0.31	4	90	0.049218	0.0313827	0.028984
86-92	0.51	5	91	0.10721	0.100774	0.0983633
86-92	0.51	5	92	0.10721	0.100774	0.0983633
85-94	0.48	8	93	-0.200659	0.198119	0.207624
85-94	0.48	8	94	-0.200659	0.198119	0.207624
93-103	1.33	8	95	0.117271	0.0311158	0.0325237
94-103	0.96	7	96	0.100371	0.0372817	0.0431798
95-102	0.94	5	97	0	0	0
95-102	0.94	5	98	0	0	0
95-102	0.94	5	99	0	0	0
95-102	0.94	5	100	0	0	0
95-102	0.94	5	101	0	0	0
95-102	0.94	5	102	0	0	0
95-103	0.88	6	103	0.146128	0.0276753	0.0325175
95-104	0.89	7	104	0.11059	0.0294224	0.0356016
0-0	0	0	105	0	0	0
104-111	1.51	6	106	0.158362	0.0465833	0.0456892
104-111	1.51	6	107	0.158362	0.0465833	0.0456892
104-111	1.51	6	108	0.158362	0.0465833	0.0456892
104-111	1.51	6	109	0.158362	0.0465833	0.0456892
104-111	1.51	6	110	0.158362	0.0465833	0.0456892
104-111	1.51	6	111	0.158362	0.0465833	0.0456892
0-0	0	0	112	0	0	0
0-0	0	0	113	0	0	0
0-0	0	0	114	0	0	0
0-0	0	0	115	0	0	0
0-0	0	0	116	0	0	0
0-0	0	0	117	0	0	0
0-0	0	0	118	0	0	0
0-0	0	0	119	0	0	0
0-0	0	0	120	0	0	0
0-0	0	0	121	0	0	0
0-0	0	0	122	0	0	0
0-0	0	0	123	0	0	0
0-0	0	0	124	0	0	0
0-0	0	0	125	0	0	0
0-0	0	0	126	0	0	0
0-0	0	0	127	0	0	0
0-0	0	0	128	0	0	0
0-0	0	0	129	0	0	0
0-0	0	0	130	0	0	0
0-0	0	0	131	0	0	0
0-0	0	0	132	0	0	0
0-0	0	0	133	0	0	0
0-0	0	0	134	0	0	0
133-138	2.06	4	135	0.217484	0.111117	0.0953155
133-138	2.06	4	136	0.217484	0.111117	0.0953155
133-138	2.06	4	137	0.217484	0.111117	0.0953155
133-138	2.06	4	138	0.217484	0.111117	0.0953155
135-146	2.44	9	139	0.113943	0.0501167	0.0507066
135-146	2.44	9	140	0.113943	0.0501167	0.0507066
135-146	2.44	9	141	0.113943	0.0501167	0.0507066
135-146	2.44	9	142	0.113943	0.0501167	0.0507066
135-146	2.44	9	143	0.113943	0.0501167	0.0507066
135-146	2.44	9	144	0.113943	0.0501167	0.0507066
135-146	2.44	9	145	0.113943	0.0501167	0.0507066
135-146	2.44	9	146	0.113943	0.0501167	0.0507066
133-147	3.47	12	147	0.158362	0.0722379	0.0703106
139-167	1.53	24	148	0.136721	0.0479072	0.0491235
147-167	0.26	16	149	0.217484	0.120811	0.137309
147-167	0.26	16	150	0.217484	0.120811	0.137309
147-167	0.26	16	151	0.217484	0.120811	0.137309
147-167	0.26	16	152	0.217484	0.120811	0.137309
147-167	0.26	16	153	0.217484	0.120811	0.137309
147-167	0.26	16	154	0.217484	0.120811	0.137309
147-167	0.26	16	155	0.217484	0.120811	0.137309
147-167	0.26	16	156	0.217484	0.120811	0.137309
147-167	0.26	16	157	0.217484	0.120811	0.137309
147-167	0.26	16	158	0.217484	0.120811	0.137309
147-167	0.26	16	159	0.217484	0.120811	0.137309
147-167	0.26	16	160	0.217484	0.120811	0.137309
147-167	0.26	16	161	0.217484	0.120811	0.137309
160-169	0.22	7	162	0.499687	0.14859	0.124025
160-169	0.22	7	163	0.499687	0.14859	0.124025
160-169	0.22	7	164	0.499687	0.14859	0.124025
160-169	0.22	7	165	0.499687	0.14859	0.124025
160-169	0.22	7	166	0.499687	0.14859	0.124025
160-169	0.22	7	167	0.499687	0.14859	0.124025
160-169	0.22	7	168	0.499687	0.14859	0.124025
160-169	0.22	7	169	0.499687	0.14859	0.124025
0-0	0	0	170	0	0	0
0-0	0	0	171	0	0	0
0-0	0	0	172	0	0	0
0-0	0	0	173	0	0	0
0-0	0	0	174	0	0	0
0-0	0	0	175	0	0	0
0-0	0	0	176	0	0	0
0-0	0	0	177	0	0	0
176-192	0.33	13	178	0	0	0
176-192	0.33	13	179	0	0	0
176-192	0.33	13	180	0	0	0
179-186	0.07	6	181	0	0	0
179-186	0.07	6	182	0	0	0
179-186	0.07	6	183	0	0	0
179-186	0.07	6	184	0	0	0
179-186	0.07	6	185	0	0	0
179-186	0.07	6	186	0	0	0
179-194	0.75	13	187	0	0	0
179-194	0.75	13	188	0	0	0
187-198	1.6	8	189	0	0	0
187-198	1.6	8	190	0	0	0
187-198	1.6	8	191	0	0	0
187-198	1.6	8	192	0	0	0
187-198	1.6	8	193	0	0	0
187-198	1.6	8	194	0	0	0
187-198	1.6	8	195	0	0	0
187-198	1.6	8	196	0	0	0
187-198	1.6	8	197	0	0	0
187-198	1.6	8	198	0	0	0
187-199	0.16	9	199	0.178977	0.150328	0.125221
195-206	0.21	10	200	0	0	0
199-206	0.14	6	201	0	0	0
200-206	0.09	5	202	0.62941	0.166487	0.326807
201-206	0.04	4	203	0	0	0
201-206	0.04	4	204	0	0	0
201-206	0.04	4	205	0	0	0
201-206	0.04	4	206	0	0	0
202-208	0.23	5	207	0.152288	0.0711052	0.108872
202-208	0.23	5	208	0.152288	0.0711052	0.108872
207-217	1.24	8	209	0.161368	0.0741079	0.0680713
207-217	1.24	8	210	0.161368	0.0741079	0.0680713
209-217	0.89	6	211	0.290035	0.0809221	0.0791635
209-217	0.89	6	212	0.290035	0.0809221	0.0791635
209-217	0.89	6	213	0.290035	0.0809221	0.0791635
209-217	0.89	6	214	0.290035	0.0809221	0.0791635
209-217	0.89	6	215	0.290035	0.0809221	0.0791635
209-217	0.89	6	216	0.290035	0.0809221	0.0791635
209-217	0.89	6	217	0.290035	0.0809221	0.0791635
209-221	0.82	10	218	0.389166	0.0973349	0.0960922
209-221	0.82	10	219	0.389166	0.0973349	0.0960922
209-221	0.82	10	220	0.389166	0.0973349	0.0960922
209-221	0.82	10	221	0.389166	0.0973349	0.0960922
220-225	0.04	4	222	0	0	0
220-225	0.04	4	223	0	0	0
220-225	0.04	4	224	0	0	0
220-225	0.04	4	225	0	0	0
0-0	0	0	226	0	0	0
0-0	0	0	227	0	0	0
0-0	0	0	228	0	0	0
0-0	0	0	229	0	0	0
0-0	0	0	230	0	0	0
229-243	1.45	13	231	0.123852	0.0881209	0.0820013
230-242	0.89	11	232	0.269513	0.094494	0.083041
230-242	0.89	11	233	0.269513	0.094494	0.083041
230-242	0.89	11	234	0.269513	0.094494	0.083041
230-242	0.89	11	235	0.269513	0.094494	0.083041
230-242	0.89	11	236	0.269513	0.094494	0.083041
235-242	1.25	6	237	0.146128	0.0518725	0.047255
235-242	1.25	6	238	0.146128	0.0518725	0.047255
235-242	1.25	6	239	0.146128	0.0518725	0.047255
235-242	1.25	6	240	0.146128	0.0518725	0.047255
235-242	1.25	6	241	0.146128	0.0518725	0.047255
235-242	1.25	6	242	0.146128	0.0518725	0.047255
230-243	1.37	12	243	0.232996	0.0870486	0.0848632
0-0	0	0	244	0	0	0
0-0	0	0	245	0	0	0
0-0	0	0	246	0	0	0
0-0	0	0	247	0	0	0
0-0	0	0	248	0	0	0
247-258	0.24	10	249	0	0	0
248-258	0.47	9	250	0	0	0
248-258	0.47	9	251	0	0	0
248-258	0.47	9	252	0	0	0
248-258	0.47	9	253	0	0	0
248-258	0.47	9	254	0	0	0
248-258	0.47	9	255	0	0	0
248-258	0.47	9	256	0	0	0
248-258	0.47	9	257	0	0	0
248-258	0.47	9	258	0	0	0
0-0	0	0	259	0	0	0
0-0	0	0	260	0	0	0
259-278	0.66	17	261	0	0	0
259-278	0.66	17	262	0	0	0
259-278	0.66	17	263	0	0	0
259-278	0.66	17	264	0	0	0
259-278	0.66	17	265	0	0	0
259-278	0.66	17	266	0	0	0
259-278	0.66	17	267	0	0	0
259-278	0.66	17	268	0	0	0
259-278	0.66	17	269	0	0	0
259-278	0.66	17	270	0	0	0
259-278	0.66	17	271	0	0	0
259-278	0.66	17	272	0	0	0
259-278	0.66	17	273	0	0	0
259-278	0.66	17	274	0	0	0
259-278	0.66	17	275	0	0	0
259-278	0.66	17	276	0	0	0
259-278	0.66	17	277	0	0	0
259-278	0.66	17	278	0	0	0
272-291	1.12	18	279	0.311754	0.0975217	0.0947572
272-291	1.12	18	280	0.311754	0.0975217	0.0947572
279-286	0.72	6	281	0.0253059	0.0241432	0.0227319
280-286	0.66	5	282	0	0	0
280-286	0.66	5	283	0	0	0
280-286	0.66	5	284	0	0	0
280-286	0.66	5	285	0	0	0
280-286	0.66	5	286	0	0	0
279-291	1.21	11	287	0.120574	0.0216494	0.0243274
279-291	1.21	11	288	0.120574	0.0216494	0.0243274
279-291	1.21	11	289	0.120574	0.0216494	0.0243274
279-291	1.21	11	290	0.120574	0.0216494	0.0243274
279-291	1.21	11	291	0.120574	0.0216494	0.0243274
0-0	0	0	292	0	0	0
0-0	0	0	293	0	0	0
292-300	0.23	7	294	0.10721	0.0638876	0.0638627
292-300	0.23	7	295	0.10721	0.0638876	0.0638627
292-300	0.23	7	296	0.10721	0.0638876	0.0638627
292-300	0.23	7	297	0.10721	0.0638876	0.0638627
292-300	0.23	7	298	0.10721	0.0638876	0.0638627
292-300	0.23	7	299	0.10721	0.0638876	0.0638627
292-300	0.23	7	300	0.10721	0.0638876	0.0638627
296-305	1.62	8	301	0	0	0
296-305	1.62	8	302	0	0	0
296-305	1.62	8	303	0	0	0
296-305	1.62	8	304	0	0	0
296-305	1.62	8	305	0	0	0
296-306	1.62	9	306	0.0170333	0.0164749	0.0131842
304-323	2.29	17	307	0	0	0
306-323	1.81	15	308	0	0	0
307-319	1.62	10	309	0.0791812	0.0601901	0.0622069
307-319	1.62	10	310	0.0791812	0.0601901	0.0622069
307-319	1.62	10	311	0.0791812	0.0601901	0.0622069
307-319	1.62	10	312	0.0791812	0.0601901	0.0622069
307-319	1.62	10	313	0.0791812	0.0601901	0.0622069
307-319	1.62	10	314	0.0791812	0.0601901	0.0622069
307-319	1.62	10	315	0.0791812	0.0601901	0.0622069
307-319	1.62	10	316	0.0791812	0.0601901	0.0622069
307-319	1.62	10	317	0.0791812	0.0601901	0.0622069
307-319	1.62	10	318	0.0791812	0.0601901	0.0622069
307-319	1.62	10	319	0.0791812	0.0601901	0.0622069
310-324	0.95	12	320	0.139879	0.0968285	0.0931069
310-324	0.95	12	321	0.139879	0.0968285	0.0931069
310-324	0.95	12	322	0.139879	0.0968285	0.0931069
310-324	0.95	12	323	0.139879	0.0968285	0.0931069
310-324	0.95	12	324	0.139879	0.0968285	0.0931069
0-0	0	0	325	0	0	0
324-333	2.05	8	326	-0.0457575	0.0249169	0.0291148
324-333	2.05	8	327	-0.0457575	0.0249169	0.0291148
324-333	2.05	8	328	-0.0457575	0.0249169	0.0291148
327-333	1.53	5	329	0.117271	0.0467083	0.0409864
327-333	1.53	5	330	0.117271	0.0467083	0.0409864
327-333	1.53	5	331	0.117271	0.0467083	0.0409864
327-333	1.53	5	332	0.117271	0.0467083	0.0409864
327-333	1.53	5	333	0.117271	0.0467083	0.0409864
0-0	0	0	334	0	0	0
333-341	0.23	7	335	0	0	0
333-341	0.23	7	336	0	0	0
333-341	0.23	7	337	0	0	0
333-341	0.23	7	338	0	0	0
333-341	0.23	7	339	0	0	0
333-341	0.23	7	340	0	0	0
333-341	0.23	7	341	0	0	0
334-342	0.18	7	342	0	0	0
335-344	0.18	8	343	-0.136677	0.109804	0.117056
335-344	0.18	8	344	-0.136677	0.109804	0.117056
0-0	0	0	345	0	0	0
344-357	0.14	10	346	0	0	0
344-357	0.14	10	347	0	0	0
344-357	0.14	10	348	0	0	0
344-357	0.14	10	349	0	0	0
344-357	0.14	10	350	0	0	0
344-357	0.14	10	351	0	0	0
344-357	0.14	10	352	0	0	0
344-357	0.14	10	353	0	0	0
344-357	0.14	10	354	0	0	0
344-357	0.14	10	355	0	0	0
344-357	0.14	10	356	0	0	0
344-357	0.14	10	357	0	0	0
345-365	1.08	17	358	0	0	0
357-365	1.24	7	359	0	0	0
358-365	1.26	6	360	-0.0705811	0.009947	0.0145047
358-365	1.26	6	361	-0.0705811	0.009947	0.0145047
358-365	1.26	6	362	-0.0705811	0.009947	0.0145047
358-365	1.26	6	363	-0.0705811	0.009947	0.0145047
358-365	1.26	6	364	-0.0705811	0.009947	0.0145047
358-365	1.26	6	365	-0.0705811	0.009947	0.0145047
358-366	0.85	7	366	0	0	0
0-0	0	0	367	0	0	0
366-372	0.48	5	368	0	0	0
367-372	0.54	4	369	0.0681859	0.0502098	0.0507917
367-372	0.54	4	370	0.0681859	0.0502098	0.0507917
367-372	0.54	4	371	0.0681859	0.0502098	0.0507917
367-372	0.54	4	372	0.0681859	0.0502098	0.0507917
367-373	0.41	5	373	0.220108	0.0882278	0.0941931
0-0	0	0	374	0	0	0
0-0	0	0	375	0	0	0
374-403	1.69	28	376	0	0	0
374-403	1.69	28	377	0	0	0
374-403	1.69	28	378	0	0	0
377-403	1.85	25	379	0	0	0
377-403	1.85	25	380	0	0	0
379-403	1.77	23	381	0	0	0
380-386	0.05	5	382	0	0	0
380-386	0.05	5	383	0	0	0
380-386	0.05	5	384	0	0	0
380-386	0.05	5	385	0	0	0
380-386	0.05	5	386	0	0	0
381-394	0.32	12	387	0	0	0
381-394	0.32	12	388	0	0	0
381-394	0.32	12	389	0	0	0
381-394	0.32	12	390	0	0	0
381-394	0.32	12	391	0	0	0
381-394	0.32	12	392	0	0	0
381-394	0.32	12	393	0	0	0
381-394	0.32	12	394	0	0	0
381-403	1.74	21	395	0	0	0
381-403	1.74	21	396	0	0	0
395-403	0.96	7	397	0.0530784	0.0236559	0.0211497
396-403	0.94	6	398	0.0569049	0.0190518	0.0203614
397-403	1.01	5	399	0	0	0
397-403	1.01	5	400	0	0	0
397-403	1.01	5	401	0	0	0
397-403	1.01	5	402	0	0	0
397-403	1.01	5	403	0	0	0
