# Supplementary material for: Rational design of potent small molecule SMARCA2/A4(BRM/BRG1) degraders acting via the recruitment of FBXO22
Source: Research Square preprint supplement (doi:10.21203/rs.3.rs-6033426/v1), 2025-03-10
Supplement: Supplementary file 4 [file 80b31f4f66b21e84d32482a7.xlsx]

## Sheet: Sheet1
			Proliferation IC50 (nM)						SMARCA2 DC50 (nM)						SMARCA4 DC50 (nM)
Cell Line Name	Derivation	Description	Compound 7	G-6599	A947	AU-15330	ACBI1	FHD-286	Compound 7	G-6599	A947	AU-15330	ACBI1	FHD-286	Compound 7	G-6599	A947	AU-15330	ACBI1	FHD-286
SW1573	lung	SMARCA4/SMARCA2 -proficient	NT	NT	NT	NT	NT	NT	>1000	0.25	0.13	1.74	5.29	NT	>1000	0.84	1.36	10.49	13.1	NT
NCI-H522	lung	SMARCA4/SMARCA2 -deficient	>1000	>1000	>1000	>1000	>1000	>1000
NCI-H1944	lung	SMARCA4-mutant NSCLC, adenocarcinoma	>1000	26.11	20.27	215.4	168.5	45.07
HCC515	lung	SMARCA4-mutant NSCLC, adenocarcinoma	>1000	42.08	52.9	181.9	260.6	119.2
RPWE-1	prostate	normal prostate epithelial cell	>1000	184.9	83	87.71	132	269.7
VCAP	prostate	AR+ prostate cancer	>1000	35.87	4.316	9.199	24.58	26.48
LnCAP	prostate	AR+ prostate cancer	>1000	12.96	3.163	15.26	16.08	8.049
