# Supplementary material for: Rational design of potent small molecule SMARCA2/A4(BRM/BRG1) degraders acting via the recruitment of FBXO22
Source: Research Square preprint supplement (doi:10.21203/rs.3.rs-6033426/v1), 2025-03-10
Supplement: Supplementary file 5 [file 9fc12130bdc0025442f88a28.xlsx]

## Sheet: Sheet1
Plate	Assay date	Well	Gene	sgRNA_1	sgRNA_2	sgRNA_3	SMARCA2 immunofluorescence, raw counts		SMARCA2 immunofluorescence, proportion of no-sgRNA DMSO control
							DMSO	Compound 4	DMSO	Compound 4
ULA1	1216	B2	SMARCA2				5672513	2.64327e+06	0.712046	0.325747
ULA1	1216	C2	SMARCA2				5.58999e+06	2.32994e+06	0.701687	0.287133
ULA1	1216	D2	CUL1	CCCUCACAAUGUCGUCAACC	AUCUGGGACGACCUCAGAGC	CGUGUAGAGCUCCAUAUAUC	8849220	7.79618e+06	1.1108	0.960772
ULA1	1216	E2	CUL1	CCCUCACAAUGUCGUCAACC	AUCUGGGACGACCUCAGAGC	CGUGUAGAGCUCCAUAUAUC	8.81601e+06	8.61574e+06	1.10664	1.06177
ULA1	1216	F2	OR5M9	UAAGGCAAUGCCUAAUUUCA	AACCUGUAGCUCCUGACGAC	AUCACUCUGUUGGGAAAUAU	10064271	4818101	1.26333	0.593765
ULA1	1216	G2	OR5M9	UAAGGCAAUGCCUAAUUUCA	AACCUGUAGCUCCUGACGAC	AUCACUCUGUUGGGAAAUAU	9705558	4.32514e+06	1.2183	0.533014
ULA1	1216	H2	OR6N1	GAGCAAUGGACACAGGGAAC	AAUCUGGACACCCUGGAGAU	AGACCACCAGGAAUAUCAGC	9970738	4.4131e+06	1.25158	0.543854
ULA1	1216	I2	OR6N1	GAGCAAUGGACACAGGGAAC	AAUCUGGACACCCUGGAGAU	AGACCACCAGGAAUAUCAGC	9.92159e+06	4.50598e+06	1.24541	0.5553
ULA1	1216	J2	PLK1	GGCCCCGCACAUAGCGCCGC	CUCGGACGCGGACACCAAGG	UGCUGCUCAAGCCGCACCAG	11019547	4.01598e+06	1.38324	0.494914
ULA1	1216	K2	PLK1	GGCCCCGCACAUAGCGCCGC	CUCGGACGCGGACACCAAGG	UGCUGCUCAAGCCGCACCAG	12599200	3.93478e+06	1.58152	0.484908
ULA1	1216	L2	DMSO+RNAiMAX				8.10999e+06	8.00463e+06	1.01801	0.986461
ULA1	1216	M2	DMSO+RNAiMAX				8.08896e+06	8.19627e+06	1.01537	1.01008
ULA1	1216	N2	Cmpd 4+RNAiMAX				4.61365e+06	4.25661e+06	0.579132	0.524568
ULA1	1216	O2	Cmpd 4+RNAiMAX				4.20962e+06	3.57072e+06	0.528415	0.440042
ULA1	1216	B3	ABL1	GGUUCAUCAUCAUUCAACGG	UGUCCCCCAACUACGACAAG	CCUCGUACACCUCCCCGUAC	9.39701e+06	4.22652e+06	1.17957	0.52086
ULA1	1216	C3	ABTB1	CGAAGGUGUUGGCCUCGCAG	AUCGCGUAGAGCCCGGCGGA	ACUAUGACGACUUCUUGCAG	9296133	4.26836e+06	1.1669	0.526016
ULA1	1216	D3	ABTB2	UUCGGCGCAGCAGCACCGCG	GAGCGAGCGGCACGAGUCCC	CAGAGUCGAGCUGUACGUCC	9043647	4.33437e+06	1.13521	0.534151
ULA1	1216	E3	ACTB	CCUUCCCAGGGCGUGAUGGU	CCUCCCGGUUUCCGGGGUGG	CAGCUCCCCUACCUGGUGCC	8.947e+06	4.49846e+06	1.12308	0.554374
ULA1	1216	F3	ACTL6A	AUGGUGGUAGAAAGAGAUGA	UUAGUAUCUAUGUAGUAGGU	CCCAUUUUUUAGAGGUGAAA	7329845	3.85662e+06	0.920084	0.475276
ULA1	1216	G3	ACTR5	CGGCACGGGCGUCGCGGAAC	CGGGCCACUGCCGGUACCGC	CGGGACACGCCCAGCCAGCG	8324831	4.82844e+06	1.04498	0.595039
ULA1	1216	H3	ACTR8	CGCUGCAAGAGGUGCGGCUC	AGGAGCAGCGCGGCGUGAAG	CCGUAUCACCCUUCUCAGCC	8.89128e+06	4904800	1.11608	0.604449
ULA1	1216	I3	ADGRB1	GCUGGGACGCCGCGCGCGGG	GGCGUUGGCCGGGAACACGG	AUGUAGAGAGUGUAGCGCCG	9.54115e+06	4.83656e+06	1.19766	0.59604
ULA1	1216	J3	ADRB2	GCCGUUCCCGGGUUGCCCCA	ACCACGACGUCACGCAGGAA	CGUCAUGUCUCUCAUCGUCC	8933954	4.48096e+06	1.12144	0.552217
ULA1	1216	K3	ADRM1	AGGCGCGCUCUUUCCAAGCC	GUACUUGGUGGAGUUUCGGG	ACUCGCUUAUUCACUUCUGC	11807991	5.54253e+06	1.48221	0.683041
ULA1	1216	L3	AIMP2	GGUCUUUCCCCAGGAUUACG	GGCUGCUCUGUGAGCACUUC	UUCAGGCACGCUCUUGACCG	8640238	4421962	1.08457	0.544946
ULA1	1216	M3	AIRE	GACGCUUCAUCUGAAGGAAA	GGGUCAGCAGCCAGGACAGG	ACAACCUGGAGCGCUAUGGC	1.02749e+07	4.69508e+06	1.28976	0.578604
ULA1	1216	N3	AKT1	CGCCACAGAGAAGUUGUUGA	CCGCUCCUUGUAGCCAAUGA	UAGGGGAGUACAUCAAGACC	8.68385e+06	4.25892e+06	1.09005	0.524854
ULA1	1216	O3	AKTIP	UUUUCAGACACAGAAGCAAA	ACAAGCUCUGUACGCAAAGU	ACAAGCUCUGUACGCAAAGU	8861174	4041340	1.11231	0.498039
ULA1	1216	B4	AMER1	UGCUUCACUCAGGCCAUCGU	CGGAGCAAAGGUUCUGGGAA	ACUGCCAUGAAACUCUUUGG	8.40945e+06	4.08276e+06	1.0556	0.503143
ULA1	1216	C4	AMFR	GCCCGGGGUCCCCCGGCGCU	CCGCGCGCUCAGCCAGCCCG	UGAGGCCCGUGUAGGUGCGG	9360896	4.22891e+06	1.17503	0.521155
ULA1	1216	D4	ANAPC10	AAUGUAUUAAUUACCUGAAU	GGUGUUUUUAGGAUUUGGAG	GGUGUUUUUAGGAUUUGGAG	9.34893e+06	4893474	1.17353	0.603053
ULA1	1216	E4	ANAPC11	GCACUUAAUCUUCACCUUCA	AUCUGCAGGAUGGCAUUUAA	UCGGGGCCGCUCAGACAGCA	1.00605e+07	5238397	1.26285	0.64556
ULA1	1216	F4	ANAPC13	GAUCUGGCAGUAACUAGUGG	AGAAGACAAGCUGCCUUAUG	CUGCAGGAAAAUGGACAGUG	9167867	5.07449e+06	1.1508	0.625361
ULA1	1216	G4	ANAPC15	GGAGGUCUCUGUCUGUGCUG	AGCUCUGUCUCUUCCACACA	UCACACGAGGGAAGAGUGAG	10754980	5.29771e+06	1.35003	0.65287
ULA1	1216	H4	ANAPC16	UCCACUGACCCCACCAGCUG	GUGAAAAGGGCUUUCCGUGG	CAUGCUGCUUUCUGAAUAAU	9.32163e+06	4.72557e+06	1.1701	0.582361
ULA1	1216	I4	ANAPC2	AUCCGCAGAGUUCUCGCAUU	CCACGGGCUACACUCGGUCC	CAGCGGUGCAGUCCCGCCAA	11541280	4.27186e+06	1.44873	0.526448
ULA1	1216	J4	ANAPC4	ACAGGUCGGAAAACGCAACA	AGGAGAUUAUUUUCCUGGUC	ACUCACCUCGCCAGCUGUGU	10201315	5.05339e+06	1.28053	0.622761
ULA1	1216	K4	ANAPC5	CUGAACGAGAUGAGCCGCAC	CGCCAAUGUGUUCGGCAUCA	GUAGAGGCUCUCGUGGACGC	11288087	5.7561e+06	1.41694	0.70936
ULA1	1216	L4	ANAPC7	GCUGCUGAGGAGCCGCACGU	UGAAUGUGAUAGACCACGUG	CUGACUCGAAAAGCCGGUAG	9.46594e+06	4.81993e+06	1.18822	0.59399
ULA1	1216	M4	ANGPT1	GCUCCAGUUGCUGCUUCUGA	GACGAGUAACCAAGCCUUGA	AGAAAUGGAAGGAAAACACA	10119393	4.9495e+06	1.27024	0.609957
ULA1	1216	N4	ANKIB1	CAUCAAUGGUGAUGAAAACC	GGCUCCCCAUAAGAUGUAUU	AUGGAAUGAAUAAAAUAUUA	8695597	4803141	1.09152	0.591921
ULA1	1216	O4	ANKS1A	GCCUUCUAGGGAUGUGGUCG	GCCUUUUGAGUCAGCCACGU	GUGCGGUUGCUCAUCCAUCA	8.80675e+06	4.19541e+06	1.10547	0.517026
ULA1	1216	B5	APC	UGUAUAUCCAUGCGACAGUC	CCGAGCCUCUUUACUGCCCC	UCACAGCCUGAUGACAAGAG	8610213	4.35818e+06	1.0808	0.537085
ULA1	1216	C5	AR	ACUCCUUCAGCAACAGCAGC	GGGGGCUCCCACUUCCUCCA	CUCCUUGGCGUUGUCAGAAA	9589189	4.66808e+06	1.20369	0.575277
ULA1	1216	D5	AREL1	GGGGAAAUUACCUGGAUCCC	GCUCGCGGUCCUCAUUCUGG	AGGUGGAAUCACAGUGUCUG	9148466	4.37685e+06	1.14837	0.539387
ULA1	1216	E5	ARIH1	UCGCGCCAUGGACUCGGACG	GGACAGCGGCGCCGAGGAGG	GCUCCACCUCGCCCAGAUCC	11277252	5.50193e+06	1.41559	0.678037
ULA1	1216	F5	ARIH2	GGGGUCUGACAGCAAUGAAG	AGACGACCCUGGGGACAUAG	CUGGUACUCCUCGGGAUCAA	9770204	5.07761e+06	1.22641	0.625745
ULA1	1216	G5	ARRB1	GCUCGCCCAGCUUCUUGAUG	GUCGUUCCCACCGGCCCCCG	CCAGGUCCUCCCGGCCAUAG	10093339	5.16163e+06	1.26697	0.6361
ULA1	1216	H5	ARRB2	AUAGCGGAAGGCGCAGGUGA	GAUGAACAGGUCUUUGCGGA	AGGCGGGUGGGGGGCCGGGG	9.9648e+06	4.88743e+06	1.25084	0.602308
ULA1	1216	I5	ARRDC1	CAUCCCCUUUGCAGCCAUCC	ACAAGGCUAAUGACACAGCG	ACCCUUGUCUGCCAGCGACA	9.23661e+06	5.10102e+06	1.15943	0.628631
ULA1	1216	J5	ARRDC3	UGUAUAGGCAGUAUUGGAGC	UCUCUUAAAAUUCAUGCAAG	GUAUCCCCACUAGAAUACAC	7834261	4.57643e+06	0.983401	0.563982
ULA1	1216	K5	ARRDC4	GCUGGGUGCGCGGCGGCCGU	CGCAAGGGCUGCUAUUCCAG	CGCGCGCAGGGCCACCGGCU	9.72898e+06	5.39928e+06	1.22124	0.665387
ULA1	1216	L5	ASB1	CAGGUCGUAAUCUGAAGGAG	UGGAGCACUGUGAGGACACG	AUAGGCUCCUGAGGGUCUGG	9.53951e+06	4.94725e+06	1.19745	0.609681
ULA1	1216	M5	ASB10	GCAGGGCGGUGCGGCCCCCA	GCAGCCGCAGGACUUCCGUG	CUGGUCUCUGACAUACGAAG	9.84859e+06	5.17598e+06	1.23625	0.637868
ULA1	1216	N5	ASB11	CUCUUCACUGCCUCAUGGAU	UGCAUGUGUCAAUGUGCUGC	GUCAAUGGAGUGACAGUUCA	9.21003e+06	4805273	1.1561	0.592184
ULA1	1216	O5	ASB12	AGCUGUCAACAUCAGCACCA	UAAGAAGCAGCCAAGCGCAA	CAAAAGCUGGUCCAAAGUAU	12163245	4.1785e+06	1.5268	0.514943
ULA1	1216	B6	ASB13	CGCAGCCAGUCUGCAGGGCC	CGAUCAGCUGUUGCAGCUGC	UUCCUUUCCAGGUUUCUGGG	9.90931e+06	4.95557e+06	1.24387	0.610706
ULA1	1216	C6	ASB14	GGACAUGGUGAAGCUUAUGC	AUCUGCGUUGUGCCAACGAG	GCUGCGUGACUGCUAUGACA	9.25514e+06	4.18586e+06	1.16176	0.515849
ULA1	1216	D6	ASB15	AGCAUCCUAUAAGACACUCU	UUGACUUUGGCAGUCAAAGC	UCAUUUACCAAUCAGAAGGG	9.07626e+06	4.10805e+06	1.1393	0.506261
ULA1	1216	E6	ASB16	UGCCGUCUGCUUGGUCUUGG	UGCUCGACACCUGAUCCGGC	GCACACAGUCAAACUGGGCU	8.97214e+06	4736663	1.12623	0.583728
ULA1	1216	F6	ASB17	GAUCACUGGCAAAAAUUCUG	AGACCCUCCCUACAGUUUUU	AGUAAAUCUACUAAAUUAUG	8262570	4.60707e+06	1.03716	0.567757
ULA1	1216	G6	ASB18	AGUUCUAUCACAGCGUCCAC	UGCCCUGGAUGCCAAAGAUG	CGACGUAACAAUGUCCAACU	1.00346e+07	4880564	1.25959	0.601462
ULA1	1216	H6	ASB2	UAGUAUGCGGCCUCGUGCAG	UUCCUUGAUCAUGGUCUUCA	GCCUGCGGACCCCUUGAUAA	8.71516e+06	4.45916e+06	1.09398	0.549529
ULA1	1216	I6	ASB3	CUGAAAAGAAGCCUGGUGCA	CAACACGGAGCAAAUGUUAA	UGUAUUACAGCUGUUGAAAA	8545842	4.57803e+06	1.07272	0.564179
ULA1	1216	J6	ASB4	UGAAGAGGGGUUUUCCCAUU	CUCAAUUGCUACUCCUUAAG	UUGGCACAGAGAAUGGAACU	8951464	4.61534e+06	1.12364	0.568778
ULA1	1216	K6	ASB5	ACUGGCGGCCUCAUGCGUUG	AGAAGCAGCUCUGCACAGCU	GUAAAUGCAAUCACGAUAGA	8.61295e+06	4.82656e+06	1.08115	0.594807
ULA1	1216	L6	ASB6	CCCAUGCCGCAAGAGAACGU	GGGCGUUGCUCACGCCUUCC	UCCUCGCUGGCGACAUAACU	8913147	4.93835e+06	1.11883	0.608583
ULA1	1216	M6	ASB7	UGUUACACCAUCAUUGUCGA	GACAUCCCCAGCAGCCACCG	CCAUUCGCAUCUCGGCCAUU	1.00261e+07	5.27183e+06	1.25853	0.64968
ULA1	1216	N6	ASB8	GCACACUCACCCCUCUGAUG	AAUUGUUCGGAUUAAGCGCU	CCUUGAUGAGUUCCAGUAUG	1.01024e+07	5117886	1.26811	0.630709
ULA1	1216	O6	ASB9	UACCUCUCCUAGCAGCUUCA	GUGAAUUUGCUUCUGCAGCA	UGAAUGGUGUGACAGCAGAC	9.28049e+06	4.18549e+06	1.16494	0.515804
ULA1	1216	B7	ASXL1	AGAACAAGCAGGGGUUGCUA	UAGCCUCCCCAUCCUUGUAG	UCUGCAGCACCCGACCUGGA	9.38023e+06	4.5866e+06	1.17746	0.565236
ULA1	1216	C7	ASXL2	AGUUCGGCUGCACUUCACCU	CACUCUGACUGGGAGACUAC	UGGAUUUUGGUUGUUCAGCU	9217980	4.47058e+06	1.15709	0.550937
ULA1	1216	D7	ATG3	GGAGAAAGCGGGGACUCCUG	CCCUGGCCUGGCUUACCUUG	UACUGUGAAGGGAAAGGCAC	1.00764e+07	4.96678e+06	1.26484	0.612087
ULA1	1216	E7	ATG5	AAGAAAAAGCUGUAAGAACU	AUCAGGAUGAGAUAACUGAA	AAGAUGUGCUUCGAGAUGUG	9.2251e+06	4.37155e+06	1.15799	0.538733
ULA1	1216	F7	ATG7	AGAAAUAAUGGCGGCAGCUA	UGCCCCUUUUAGUAGUGCCU	GAAGCUGAACGAGUAUCGGC	8804173	4642816	1.10515	0.572163
ULA1	1216	G7	ATM	UAAUGAAGAUACCAGAUCCU	AUUACAGUGUCCCUUGCAAA	AAUCAUUCUGUGACUUCUGA	8.31685e+06	4578357	1.04398	0.564219
ULA1	1216	H7	ATXN3	AGAUUAUCGCACGUUUUUAC	UGCACAUCAGCUGGAUGAGG	UGCCUGAAUAACUUAUUGCA	9.24145e+06	4.59551e+06	1.16004	0.566334
ULA1	1216	I7	ATXN3L	AAAUGCAAGAUACUCUUCAC	AUCAGCUAGAUGAAGAAGAG	AUCUUUCAUGAGAAACAGGA	8.75431e+06	4.77129e+06	1.09889	0.587996
ULA1	1216	J7	ATXN7	CCUUUGCUUUUGGACAGAGA	CAACAACUUGGAACUUGAUG	CUGAAUGGGAUGCAUUGGCC	8944711	4.31226e+06	1.12279	0.531427
ULA1	1216	K7	ATXN7L3	CUCACCGGCGGUUGGCGAUU	GCAAUGCUGCGACUGCAAUU	GAUCGUGGACCAGCCGGGCU	9.67247e+06	5652956	1.21414	0.696649
ULA1	1216	L7	AURKA	UAAGUGUUCAUUUAUUGUCC	AUUCUGGAAUAUGCACCACU	CCUAAUAUUCUUAGACUGUA	14601068	4.58551e+06	1.83281	0.565101
ULA1	1216	M7	AURKB	UGACGAGCAGCGAACAGCCA	UCUAGAGUAUGCCCCCCGCG	UUGUAGAGACGCAGGAUGUU	1.24202e+07	6.31297e+06	1.55905	0.777987
ULA1	1216	N7	AVPR2	AGCUCCGCCCGGGCUAGCAG	GAGCAAUGGCCUGGUGCUGG	CCAGGUCGGCCAGGCACAAG	9.02207e+06	5.02873e+06	1.1325	0.619722
ULA1	1216	O7	AXIN1	UGAACAGGCUUAUCCCAUCU	CACCCCACCAUACUUGAAGU	CAGAUCCGAGCGCCUCGGAG	8834288	4.36415e+06	1.10893	0.537821
ULA1	1216	B8	AXIN2	UGUCAGCCAGGGGUGGGCAA	GGGGCCGCGGGGCAUCCUCA	CACCAUGAGUAGCGCUAUGU	9860595	4.91861e+06	1.23776	0.606151
ULA1	1216	C8	BABAM1	CCACACAGGAGCCAUGGAAG	AGGAGCACUCGGCAGAGCCU	AGUAGGGGCACAGGCCAGCG	9271551	4.29356e+06	1.16382	0.529121
ULA1	1216	D8	BACH1	AAUGUCUCUGAGUGAGAACU	UACUCAGCCUUAAUGACCAG	CGCUCACCGGUCCGUGCUGG	8.61441e+06	4244422	1.08133	0.523066
ULA1	1216	E8	BACH2	CCAAAAAUAUUCACUGCAUG	AGAGAAUAUCCUUUUUCCGC	GUGGACUCAUACACAUACAU	8.89335e+06	4.60121e+06	1.11634	0.567035
ULA1	1216	F8	BAG5	UCUGUAUUUCAAUCCGGUGU	UAUUCAGCAAGCUAGGAAGC	AGAAUUACAAGAAACUGGAG	8.45204e+06	4.42718e+06	1.06095	0.545588
ULA1	1216	G8	BAP1	GGUGCCUACCAUGGUCAAUG	GUCAGCUAUGUGCCUAUCAC	UAAGGCCAUUCUGCUUCUCA	8.05114e+06	3.77788e+06	1.01063	0.465572
ULA1	1216	H8	BARD1	CUUCUCCAGGCGGUCGAGCG	CGCGGAACGAGGCUCGUUCC	GCGGGACGAUGCCGGAUAAU	10965438	5.23748e+06	1.37644	0.645447
ULA1	1216	I8	BCL10	CAAGGGUGUCCAGACCUUUU	ACAUCAAGUAGAAAAAGGGC	CAGCUAUGAUUUUCUCACAC	8.12864e+06	4.72699e+06	1.02035	0.582536
ULA1	1216	J8	BCL2	CCCGGUGCGGGGGCGGCCCC	CAUUAUAAGCUGUCGCAGAG	AUGGCGCACGCUGGGAGAAC	9.03963e+06	4.80393e+06	1.13471	0.592018
ULA1	1216	K8	BCOR	GCAAUGGACGAGAGGCGGGA	GGACCGACGUAGUGAGGUGG	GACUGGAGAAUACAGCGGCU	9402008	5.13011e+06	1.18019	0.632216
ULA1	1216	L8	BECN1	CUCGCUGACCUGUGAGUUCC	UCGUGUCCAGUUUCAGGGGC	GUCCAACAACAGCACCAUGC	9770176	4.87507e+06	1.22641	0.600785
ULA1	1216	M8	BFAR	CCAGGAUGUCGUAGCAGCAG	UCACUGCCUUGCUUUAUGGU	CCUGAGGAGAAUACUGACUU	8600913	4.75271e+06	1.07964	0.585706
ULA1	1216	N8	BHLHE40	GGCCAAGCACGAGAACACUC	CGAGACCACCCGGUGGAGGU	CAGCUCUCCGGCCAAAGGUU	1.06525e+07	4.96272e+06	1.33716	0.611587
ULA1	1216	O8	BIRC2	AUGCUGGAUAACUGGAAACU	GAAUCUGGUUUCAGCUAGUC	ACAUUCAUUAUCUCCCACCU	8914377	4.17461e+06	1.11898	0.514463
ULA1	1216	B9	BIRC3	AUGCUGGAUAACUGGAAAAG	CUCUGAACGAAUCUGCAGCU	AGAAGGAAAAGUAGGCUGAG	9394060	4.40902e+06	1.1792	0.543351
ULA1	1216	C9	BIRC5	CUGUCCCUUGCAGAUGGCCG	AAGAAACACUGGGCCAAGUC	ACUUACAUGGGGUCGUCAUC	1.27437e+07	5.82815e+06	1.59966	0.71824
ULA1	1216	D9	BIRC6	UCCACUUCUCUAGGUAUGGC	GUCAAGGCAGUGAAUGAAAG	UUAUUCACUUGCUUCACUUU	9.24515e+06	4.57295e+06	1.1605	0.563553
ULA1	1216	E9	BIRC7	GGAGACUCACUCCCAGCUGC	UGGCUCCUUCCAGGACCCGU	GUGUCAGCUCUCACCGGAGG	1.02955e+07	4.92014e+06	1.29235	0.606339
ULA1	1216	F9	BIRC8	UGUUCCCAAGGAUCUUCCUU	AUUUUAUGCUAUAGGUCAAG	CCAUGACGGGUUAUGAAGCC	8774828	5.66262e+06	1.10147	0.697839
ULA1	1216	G9	BLMH	CAUCUGUCUGAAGCGGGCCA	GGCAAGUACGAACUGGGGGU	UCUCCCAACAGGACUGAAUU	9.07785e+06	4.39413e+06	1.1395	0.541516
ULA1	1216	H9	BMI1	AACGUGUAUUGUUCGUUACC	CCAGACCACUACUGAAUAUA	GGAGUUGUAUAAUUUACUGA	9.60898e+06	4785370	1.20617	0.589731
ULA1	1216	I9	BRAP	CAUACCUGGGUUGGACUUCA	AUAAUCGCUACUUUCUCUCC	AGCCGGGGAAAUGUCUGAUG	8930340	4.82289e+06	1.12099	0.594355
ULA1	1216	J9	BRCA1	CUGCUAUUUAGUGUUAUCCA	UCCAUUCUUUUCUCUCACAC	GUAAGGAAACAUGUAAUGAU	9147909	4.66341e+06	1.1483	0.574701
ULA1	1216	K9	BRCC3	CACAGGUUGGCUGAACUGAC	UGAUACUUACCAACAUGUGA	AAUAACCAUACCCUAUGUAA	8658864	4.55799e+06	1.08691	0.56171
ULA1	1216	L9	BRE	AGGAUUUGAAGGAUUCCAGG	UGAGGCGGGAGCUCUCCCGG	UCCAUGUUCUCUCCAUACUG	9754396	4.53744e+06	1.22443	0.559177
ULA1	1216	M9	BTBD1	CUACAACUGGCAGGCGACCA	UGAGGCGGAGCCGGGCCCCG	GCUGGAGGAUGGCCUCACUC	1.15805e+07	6219858	1.45365	0.766512
ULA1	1216	N9	BTBD11	AGCGGCGGCAGCACGAGGAA	CAGCGACGACGUCCGCCAGG	CGAGCCGCGCCAGCUCAGGU	9113495	4.74681e+06	1.14398	0.584979
ULA1	1216	O9	BTBD18	GAUCAGCACACUUAGGAAGC	CGGGAGAGGCCAGCUCAGGG	GACAGGAUGCAGCAGUGAGC	10182786	5.06144e+06	1.2782	0.623753
ULA1	1216	B10	BTBD2	UCGGGGCGCCCACCUGUGCG	UGCGACGUGCACUUCCUGGU	CUCCUGCACGGUGGGCUUGC	8905105	4.33361e+06	1.11782	0.534058
ULA1	1216	C10	BTBD3	AGUUGGCUGGCUUUUUACGG	CAGUAACAACAACCUUAUCC	CGGCACUUACCUCUCUCUAA	9.70667e+06	4.68448e+06	1.21844	0.577297
ULA1	1216	D10	BTBD6	UUUCUCCUCCCAGUACGUCU	CGCCAGGUCUCCGUAGAACA	UAGAGUGGACUUACUUUAAG	8823954	4.46994e+06	1.10763	0.550859
ULA1	1216	E10	BTBD9	UAUGGUGCAGAGAUACUCAG	GCUGCUGGACUUUUUGAGCC	CUACUCAAAUAUAUCUACAC	8875350	4.8223e+06	1.11408	0.594281
ULA1	1216	F10	BTRC	CUACAGACAAAACUUGCCAA	AGCAAGCUAUGAAAAGGAAA	AUGUUGGUAAUGACACAUUU	8858082	4.79621e+06	1.11192	0.591067
ULA1	1216	G10	BUB1	GGUUUUGAAUUCCUCUCUGA	GGCUUCCAGAUGCCCCGCCC	UUUCUGUACAACCAUGGGAU	9.28404e+06	4.71815e+06	1.16538	0.581447
ULA1	1216	H10	BUB1B	UCACAGUGAAGCCAUGUCCC	AUGUACAACCUUUAAGGCAA	CUGCUGAAGAGUAUUGUUAC	8.837e+06	4576024	1.10927	0.563932
ULA1	1216	I10	BUB3	CAGCUUGAACUCGUUAGAAC	UGUCCCAGGAGGAGACAAGC	GUGCUGGUACUUGAGCCGCA	9.76067e+06	4.41138e+06	1.22521	0.543641
ULA1	1216	J10	C18orf25	UGGAAGUUUCACUUUCAGAU	GGCCGAGUCGCCAAGGUUAA	GCUACUGAGGCAGAAACGGG	8.76221e+06	4.24466e+06	1.09988	0.523096
ULA1	1216	K10	C19orf68	UCAGCCGCUUCUUCGACGCG	UGCACCUGGCGCGCUGCCGC	CUACGUGCGGCUUGUGUGCA	8.75882e+06	4.6455e+06	1.09946	0.572494
ULA1	1216	L10	CACUL1	GGGAUCGACGAGGGGGGCGG	CCGCAGCCUCCCAGUUGUUG	GGAAAGCAUGGAAGAGGAGG	12506712	5728186	1.56991	0.70592
ULA1	1216	M10	CAND1	GUGAUGAUGAUGACAUGAGU	UGGAUGCUGUAGUUAGCACA	AGAGCGUGAAGAGAAUGUAA	9890976	7.65337e+06	1.24157	0.943173
ULA1	1216	N10	CAND2	GGCCACCAGCGACCUGAUGU	CGAGGACAGCGAGCGCAAGG	GAACGGUGAGGUGCAGAACC	9430929	4633518	1.18382	0.571017
ULA1	1216	O10	CAV1	GAUGUGAUUGCAGAACCAGA	CACAGUGAAGGUGGUGAAGC	GCAUCCCGAUGGCACUCAUC	7.983e+06	4.36775e+06	1.00207	0.538265
ULA1	1216	B11	CAV3	GACGUGAUCGCAGAGCCUGU	CCGUCUGUUGUCCACGCUGC	AGAAGGAGAUGCAGGCGAAC	9213785	4.3245e+06	1.15657	0.532935
ULA1	1216	C11	CBFB	UGCCUUGCAGAUUAAGUACA	UUCCAGAACGCCUGCCGCGA	CUUGUUGCGCGGGGCCGCGG	9.35911e+06	5.16258e+06	1.17481	0.636216
ULA1	1216	D11	CBL	GCUGGUAGGUAUCUGGUAGC	UGGAGAAAAUGAGUAUUUUA	GCAAACCAUAAGCCUCUUCA	8541437	4.45969e+06	1.07217	0.549595
ULA1	1216	E11	CBLB	AAGACUCUUUAAAGAAGGCA	AGUACUCAUUCUCACUGAGU	CGUAAAUGCUGAUAUGUAUC	8.6344e+06	4.7561e+06	1.08384	0.586124
ULA1	1216	F11	CBLC	CGAGGCUCCCAUGGCUCUGG	UGACUGCCCGGCCCAGGGCG	GGGGGACUCACGGACAGCCG	10866510	5.06649e+06	1.36403	0.624375
ULA1	1216	G11	CBLL1	AACACAGACAAUGAGUUACA	UGUUUGGAGAUGAGCUUUAU	AUGCCUGCAAAGGCUCCACC	8.56663e+06	4.05962e+06	1.07533	0.500292
ULA1	1216	H11	CBX8	CUCUGCGCGGCAGGUGCUGC	UUCGAAGGCCCUCCCGGGCC	ACUUCGAAACUCGUAAGUUU	9046531	4.38647e+06	1.13557	0.540572
ULA1	1216	I11	CCDC22	GGACUCGCCUGGAACUCCCG	GCCACCCUUCCAACAGGCUG	CAGACGGGCCGGGACCGGCC	9.09502e+06	4454593	1.14166	0.548967
ULA1	1216	J11	CCIN	UGUGACCGGGCUCAGGUAAC	AUGUGGAGGAGCUGCUUCGU	CACGGCAGAUGGACUUAAUA	8.47947e+06	4.43641e+06	1.06439	0.546726
ULA1	1216	K11	CCNA1	CACUGCAGCAACCCCAAGAG	GUGAGUAUCUGACAAGCAUC	CUAGGGCUGCUAACUGCAAA	8.11378e+06	4.3915e+06	1.01849	0.541192
ULA1	1216	L11	CCNA2	CAGUACCGCCAGCGCGGCCC	UGAUAUUCUCCUGGUCCUCU	UGUUGGGCAACUCUGCGCCG	11734874	5.45782e+06	1.47303	0.672601
ULA1	1216	M11	CCNB1	AAAUAAGGCGAAGAUCAACA	UGAGGCCAAGAACAGCUCUU	UACCUUCUUCAUAGGCAUUU	10934639	3.87251e+06	1.37258	0.477233
ULA1	1216	N11	CCNB1IP1	UGACAUCUCUGAGAAACUUA	GGUAACCUCCCCUUUCAUAG	UACAAUUUCAGCAAGGCUGA	9727571	4.85658e+06	1.22106	0.598506
ULA1	1216	O11	CCNC	AUUGGUUCAAAUUGUAUAGU	AGAGAAACUUUAAAUCCUUU	UUCUAGUUUGCAAUGGAUUU	9069325	3.85089e+06	1.13843	0.47457
ULA1	1216	B12	CCNF	UCUCGCUGAGCGGCUGAAUG	CGCCCUCCGUGGUCGGUGAG	CCAGACUCACCCUCUGCAGC	8.98915e+06	4820256	1.12837	0.59403
ULA1	1216	C12	CCP110	GUAGAGUGUUCCGUAUGGCU	CAUUGGUCCUCAUUAUCCAA	UUGGAACUAUCACAUUGCUU	9996631	4725324	1.25483	0.582331
ULA1	1216	D12	CD300LD	CUGAUCCAUUUGUUUUAACA	UUGACUGUGCAGUGUGCUUA	ACCAGUGAUUUUAGCGGCAA	8.66987e+06	4.32174e+06	1.08829	0.532595
ULA1	1216	E12	CDC14B	GCGGCGCGGGUCUUGCUGCG	CGACGAGCAGCGCCGCGAGC	CCAUGAAGCGGAAAAGCGAG	8.37907e+06	4.56984e+06	1.05179	0.56317
ULA1	1216	F12	CDC16	AGUUCUAUCUGUCUUCUACG	UUUGUAGCUGUAGGUAGCCA	CACAUGCUGACAGCACAAGA	1.14241e+07	6.06206e+06	1.43402	0.747065
ULA1	1216	G12	CDC20	GAAUGUACUGGCCGUGGCAC	UUUGCAAAUGGAGCAGCCUG	CACCUGCACCUCAGCACUGC	9.51024e+06	2627053	1.19378	0.323748
ULA1	1216	H12	CDC20B	CGGUGUCUUCAGCACUGAUC	CUCUGUCCUCUGAUUCCUUU	UUAAGAGCAACUUUGCGAAG	9958551	4859805	1.25005	0.598904
ULA1	1216	I12	CDC23	GUAGGCCCCGCUCCCGGGUA	ACAGCGAUUUCUCAGAUUUG	AAUGGCUGCGAGUACCUCCA	1.08041e+07	6.68081e+06	1.3562	0.823318
ULA1	1216	J12	CDC25A	GCUGGUCCAUAGUGACGGUC	ACGACGGGCUGCGACGCGGG	CCGGGCGCCGCCAUGGAACU	9312489	4795645	1.16896	0.590997
ULA1	1216	K12	CDC26	AAAGUUGUAUUCAUACCUCC	AAAGUUGUAUUCAUACCUCC	AAAGUUGUAUUCAUACCUCC	9722798	5265539	1.22046	0.648905
ULA1	1216	L12	CDC27	GGAAAAAAAGAAGAGGAGAU	AAUCAUUAUGUGAAAUAGGU	CUCUCCACAGCAAGACAGAU	1.23789e+07	4.37796e+06	1.55387	0.539523
ULA1	1216	M12	CDC34	GGGCACUAGCGGCCGAGCCA	CGAGGGAUUCCGCGUGACAC	CCCUCGUAGUAGGUGUUGGG	9499893	4.83354e+06	1.19248	0.595667
ULA1	1216	N12	CDC42	UUUCUUUUUUCUAGGGCAAG	AUUUGAAAACGUGAAAGAAA	AUUUGAAAACGUGAAAGAAA	8698290	4.75092e+06	1.09186	0.585485
ULA1	1216	O12	CDC73	UUUGUCUGAAGCUAUGUCAG	ACAUAACUGCCCUUAAACAG	UCUCUCUGCUGACAAUAUCU	1.07397e+07	4943301	1.34811	0.609194
ULA1	1216	B13	CDCA3	CCAACGCUUACCUCCACUGC	AGAGCGGGGAUCUGAGUCCU	CCACAGCCAGGCCUACCAGC	10001670	5.46171e+06	1.25547	0.673081
ULA1	1216	C13	CDK1	ACCCUUAUACACAACUCCAU	GGGUUCCUAGUACUGCAAUU	ACAACAUACCUGACUAUAUU	16831683	7.42647e+06	2.11281	0.915211
ULA1	1216	D13	CDK2	CUUCAUGGAGAACUUCCAAA	CAAAGCCAGAAACAAGUUGA	AGGCCACUCACGUGUCCAGG	11248683	5.23678e+06	1.412	0.64536
ULA1	1216	E13	CDK5	GGGAUCUGACUGCUGCCCAC	CUGGAUGACGAUGAUGAGGU	CACCUACGGAACUGUGUUCA	9.85888e+06	4726065	1.23754	0.582422
ULA1	1216	F13	CDK5RAP3	UUCUCAUGUAGAUUGGCUGG	UGGCAGCAUUGAUCUUCUCG	ACAGGACCCAGACAGCAGCU	10015064	4887154	1.25715	0.602274
ULA1	1216	G13	CDK9	CUUCCUGCAGAUCCUGCAUA	UCGUGAUGGGGUCCUGAAGC	CACACGGUUGGUGUAGCGGU	1.07882e+07	5.30501e+06	1.35419	0.65377
ULA1	1216	H13	CDKN2A	GCCAGGGGCGCCCGCCGCUG	ACGAAAACCCUCACUCGCGG	GCGGCGAGAACAUGGUGCGC	7.9188e+06	4.21034e+06	0.994013	0.518867
ULA1	1216	I13	CENPF	CUUCAUCAUCUGUGUUCUCA	GCAGAGAAAUCUCUCCUAAU	AGUCGAUCAACUUUGCAAAU	9073831	4.711e+06	1.139	0.580566
ULA1	1216	J13	CENPS	UCGGCCCGCAGUGAUGGAGG	CCCCGUUUUCCUGUACCUGU	GAAAAGUACCCGGCAGCCCC	8.79765e+06	4.46903e+06	1.10433	0.550747
ULA1	1216	K13	CENPX	GACAUACCCCCGCCCUCCCG	CGCACCCCCACCCGCACCUU	CCUUCUAGGAGCUGGUGAGC	10291235	4.6259e+06	1.29181	0.570079
ULA1	1216	L13	CFTR	UAAGAGAGGCUGUACUGCUU	CGCUCUAUCGCGAUUUAUCU	CUCCUACACCCAGCCAUUUU	8.89766e+06	4.57802e+06	1.11688	0.564178
ULA1	1216	M13	CGRRF1	GAGCAAGACCCUGAUGGCUG	GCCGCUUUUCUACAUCGCGG	UUACCAUCCCAAUACCAGGC	9.19591e+06	4.58613e+06	1.15432	0.565177
ULA1	1216	N13	CHD5	GCCCCGCCCACCUGAGGAAC	GGUAAUCCUCCUCCGAGAAC	CAAGUCCUCGGGGCAGCUCA	8668012	4.42871e+06	1.08806	0.545777
ULA1	1216	O13	CHFR	UCCACUCCCGCUUCCUCAGG	UGGGGACGGCUCCUGCGUCU	AAUCCCGAUGGAGCGGCCCG	9.35229e+06	4.84477e+06	1.17395	0.597051
ULA1	1216	B14	CHP1	GCAGCCGGGAAGAUUUCCAG	GACUCACCCCUCUGGAAAGA	CUAAUCUGGAAUAAUGAUAU	9499991	4.83522e+06	1.19249	0.595875
ULA1	1216	C14	CISH	UCCUCUGGGUCCAGCACCUU	CAAGGGCUGCAUGACUGGCU	UUCUAGACCUCGUCCUUUGC	8.92185e+06	4.65972e+06	1.11992	0.574247
ULA1	1216	D14	CLSPN	AGUGAGGAAUGUCAGGUUGG	UGACAUUAGACCUUCACCUG	UGAGUCUUGCAGGAAGGAUU	9182159	4371660	1.1526	0.538747
ULA1	1216	E14	CLU	GCGUGCGUAGAACUUCAUGC	AGUGUGCAAUGAGACCAUGA	AGGAUGCCCUAAAUGAGACC	9685208	4.51536e+06	1.21574	0.556456
ULA1	1216	F14	CNOT4	GUAUUUACCUUUCUACAUGC	UCGGCAAAUCUGGUAGCCAC	ACAGGGUCUUCCUUCGCAUC	8068784	4.28522e+06	1.01284	0.528094
ULA1	1216	G14	COMMD1	CCUUCGCAGAGCAUGGCGGC	CUGUGAUGCCGGGGUACCCG	CGAGGAGUUCCGCCCCUUUC	9.82554e+06	5157455	1.23336	0.635585
ULA1	1216	H14	COMMD3-BMI1	GAAAGGCUUCCAGAUGCUGG	CGCCCGGAGGAGAAGCGUGA	GCCGAGCGGCUUACCUAACA	9278569	4.88027e+06	1.1647	0.601426
ULA1	1216	I14	COPS5	UAGUCCAGGGCUUCGCCGCC	CUGAGCUUCCUGCAUGUUGU	CCUCGGCGAUGGCGGCGUCC	9.24935e+06	8.59014e+06	1.16103	1.05862
ULA1	1216	J14	CRBN	CGCACCAUACUGACUUCUUG	GUGAUGAUGAUCCUGAUUCC	AUAGUACCUAGGUGCUGAUA	9276211	4.61117e+06	1.1644	0.568264
ULA1	1216	K14	CRY1	UUCGCCGGCUCCUCCAAUGU	CGCCCUGAAUGCACUCCUUC	UGGGGGUGAACGCCGUGCAC	1.00728e+07	4.93979e+06	1.2644	0.608761
ULA1	1216	L14	CTR9	UAGCUGGAAUACUACAAGCA	AAGUCAUCUGGUCUUUUUCA	GGCUCGGAAAGAAAAGAAUA	9901485	4482194	1.24289	0.552369
ULA1	1216	M14	CUL1	CCCUCACAAUGUCGUCAACC	AUCUGGGACGACCUCAGAGC	CGUGUAGAGCUCCAUAUAUC	9208446	7.64218e+06	1.1559	0.941794
ULA1	1216	N14	CUL2	AGGAGGCUGUUUACCUUUAA	CAAAGGAGUUAAUAACCCCA	CCUUGUUUUAGUGAUCGUGG	9646189	5.09791e+06	1.21084	0.628247
ULA1	1216	O14	CUL3	UACCUUAUUUAUGAGAUGUU	ACAAUGGUUUUGCAUAAACA	AUCCAGCGUAAGAAUAACAG	10288665	4.63201e+06	1.29149	0.570831
ULA1	1216	B15	CUL4A	CCAUAUUAUUAGUGAUAAAA	UCUCGCGCUCGAUCAGCAGU	GGUCAGACAGCAUGCCCAGG	9405474	4.37456e+06	1.18063	0.539104
ULA1	1216	C15	CUL4B	AAUCAGACAGCAUGCUUAAA	GUGCAGAAUAAGACAAUUGA	UUAUUUUAGGGACAUGGGAC	8.72992e+06	4.23797e+06	1.09583	0.522271
ULA1	1216	D15	CUL5	UAAAAGCAUAUAUUGUUGAA	UCAACUAGAGAUUACUUUAA	GGAAGACAGUAUUGUUCGAA	8.8326e+06	4.48876e+06	1.10872	0.553178
ULA1	1216	E15	CUL7	CCUCCAGCACAGAUUUGUCC	GCGAGGAUGGCCAGGUCAUC	GGACGGGGGCUCUGGCCAAG	1.09634e+07	5.42991e+06	1.37619	0.669162
ULA1	1216	F15	CUL9	AGGUGAGCGGGCACUAUCUA	AGCUUUCCUCGAGAUCCAGG	CGCUGGUACGCAGGGCGGCC	8928551	4.40631e+06	1.12076	0.543017
ULA1	1216	G15	CYLD	AUCGUUCUGUGGGGCAUUCA	AGUUCUCUUUGUUGAUGAAA	GCUGAACCUCUCCUCACAAU	9003109	4.33618e+06	1.13012	0.534375
ULA1	1216	H15	DAXX	UCUGAGCCUCAUGGGGCCAG	CUCCCACCCACUCCCCAAUG	CAGCACGAUGAUGCUGUUAG	9652198	4732866	1.2116	0.58326
ULA1	1216	I15	DCAF1	UGUCUCGCAGUAGCACUGUC	GGGCAUCUUAAUGGACAGUA	CACAUUCCACAUCUUGGCCA	1.01276e+07	3.23095e+06	1.27127	0.39817
ULA1	1216	J15	DCAF10	CAGAGCAGGUAGCAAACAGC	CUUUACAUGGUCACACUAGC	UUAGUAACAUCAGGAUUUGA	8.19363e+06	4.34576e+06	1.02851	0.535556
ULA1	1216	K15	DCAF11	GUGACCAGAAGAUGGGAUCG	UCCGAGGGCUUGCCCCGAAG	UGAAGAUGUGGAUCUGGCCC	9.62621e+06	4607361	1.20834	0.567794
ULA1	1216	L15	DCAF12	AGGAGAGAGAGUUUCACCUU	AUGCAACACUCGAGAGUAGC	UAUACUAAGGAUCUCUUCAC	8.18727e+06	4.28979e+06	1.02771	0.528658
ULA1	1216	M15	DCAF13	CCUUAUCAUAGGUUAGAAUU	GAAUAUGUACUCGCUUUUGU	UCAUUAAAUUUGAUCAACAU	11390265	4.78143e+06	1.42977	0.589245
ULA1	1216	N15	DCAF15	CGCCCAGCUCGAAAUCGGAG	CGGGGGAGCCGGAGGGAAGC	CAAGCAGCUGGAGCGGGUCA	9.64957e+06	4.8151e+06	1.21127	0.593395
ULA1	1216	O15	DCAF16	UAAAAGGCACUUAACCUGCC	CAUAGAGUCCUCUUCUUCAG	UUCUGACAAGUGGUCAGGAG	8.61273e+06	4699357	1.08112	0.579131
ULA1	1216	B16	DCAF17	GGGCUUCCGGGUCGGGCCCA	GGCUGCUUCUCGCGCGACGC	CCUGGCACACCAGCGCCCGC	9734985	4.69137e+06	1.22199	0.578147
ULA1	1216	C16	DCAF4	AGGCAGAUACCAACAGUGAC	UCUGAAGACCCCUACGCUCA	UGGGCAACGUACCUUCCGGU	9551520	4.39528e+06	1.19896	0.541658
ULA1	1216	D16	DCAF5	AUAAAGGGGGCUCACCUCUG	AUUGGCUGUGGCCAACAACC	AGGCUGAUGGAUAGUUUGCC	1.09636e+07	5.32142e+06	1.37622	0.655792
ULA1	1216	E16	DCAF6	CUCCUACCCACACCUGUUGU	AGCGACUCCGCAGCCGGGAC	GCUGAGGUCGCCGCCUAGAG	10440262	4.69081e+06	1.31052	0.578077
ULA1	1216	F16	DCAF7	CCGUUUGCCGUGCAGGGACA	ACGCGAUGAACUGGAGUGUG	CGUGGAGGAGUACAACAACA	8.89764e+06	4.31519e+06	1.11688	0.531788
ULA1	1216	G16	DCAF8	UUGCGCUGUACACGGCGCCG	CCUCUUCCUCUGAGCGGUCA	AGAUAAGGACUCUGACAGCA	9.7482e+06	4774605	1.22365	0.588404
ULA1	1216	H16	DCST1	UCCCCCUCUUAGCGGUGCAG	CUGGUUCCUGUGGCGCCAGC	GGCAGGCGCUGGGGGGCUCC	11047156	17549958	1.3867	2.16279
ULA1	1216	I16	DCUN1D1	UUCUCAUAAGCCCAUCUCUU	GUGUAAAAGGAUCAUUGGAC	GUGUAAAAGGAUCAUUGGAC	8486093	4.53288e+06	1.06522	0.558616
ULA1	1216	J16	DCUN1D2	CGGCUGUACGGCAGGUACAA	ACUCCCUGUGGAGCGAGUCU	ACUGCUUAACGCAGAAUGAG	9193087	4.50819e+06	1.15397	0.555573
ULA1	1216	K16	DCUN1D3	CGAGGACGUUGGCAGCUGGC	UUGACGAGGAUAUCUCCACC	UCGACCCUGGGCAGCAAAAA	9202447	4368255	1.15514	0.538327
ULA1	1216	L16	DCUN1D4	UUAAUAAAGUGAUGCCACCA	CCUAUCAUGUCUACUUUUCU	UAGAAGACCCACACUGAAUU	9123243	5.02147e+06	1.1452	0.618827
ULA1	1216	M16	DCUN1D5	CUCCAGUUGUCCAGCAAAGG	UGGAGAUUUUACACUUUUUG	GAAGAGAAAAUCCCCUGGGG	9.09318e+06	5.56296e+06	1.14143	0.685559
ULA1	1216	N16	DDB1	ACCUCACCUGGACAUUGCCA	CUGUUUAUACUCCAGGAUGC	UGGUUUCCAGGGGGAGAGCA	15761490	6.17555e+06	1.97847	0.761052
ULA1	1216	O16	DDB2	UCUGAGUCACAUCUUCUGCU	CACCAUGCCGCAGCAUCGUC	UUCCUGGCCAUCUGUCCAGC	8795599	4.11345e+06	1.10407	0.506926
ULA1	1216	B17	DDX58	CUUGUGAACAACCUUAAAAA	UCUCAACAAUCUGUUCCACU	UUUCCCAGGUAUAGAGUUAC	8.55302e+06	4.1623e+06	1.07362	0.512947
ULA1	1216	C17	DERL1	UACCUGAAAGCGAUAAAGGA	GCCGACCAAGGGCACGGCGA	AGAUGUCGGACAUCGGAGAC	9343425	4178582	1.17284	0.514953
ULA1	1216	D17	DET1	AUUACCAAUGUUGCGGCCAA	GCUGGUCAUUGCCAUUGGAC	UCUUGAAAUCUAUGAGUACC	8754693	4.35366e+06	1.09894	0.536529
ULA1	1216	E17	DISC1	UGGCGAGGAGUCCCACCACU	AAACAGGGCUCCGGACCAAG	GAGGAACCUCGGCGCACUUU	9744901	4.88597e+06	1.22324	0.602128
ULA1	1216	F17	DMWD	AGGCGGCACCGGAGUCUGGG	GGUUUCUACAAGCUACUCCC	GCAGUCCCCCAUGGCGGCGC	10058331	4.87077e+06	1.26258	0.600255
ULA1	1216	G17	DNAJA1	AACUUACUACGAUGUUUUGG	UCACCUUCUCUCCUUCAUUU	UAAUAGAAAUACUAUACGUC	8.27231e+06	3.90193e+06	1.03839	0.480859
ULA1	1216	H17	DNAJA3	CUGCGCGGUGCUCCACACGC	GUAGAGGGGCCCGGCCGCCC	GCGUCUUCCCUGACCUCUUG	9.51669e+06	4.19821e+06	1.19459	0.517372
ULA1	1216	I17	DNAJB2	UCCAGGAACUGGCCCAUCUC	CACCUUCCGCAGCCCCGAGG	CACCAAAGAGCUCUGCAAAA	1.01236e+07	5.25914e+06	1.27077	0.648117
ULA1	1216	J17	DPF1	GCCCACCUGACAGUCCAUAA	UCUACUGUGUGCAGAGACGG	CUGUGAAGCACCCCUGAAGA	9.94238e+06	5.10206e+06	1.24802	0.628758
ULA1	1216	K17	DPF2	CUUUGUAGUACUGCUCCCCA	GCACGCUGCGCUCAGCACAG	CCAGAUGUAACAAUUGCUCU	8959126	4.34548e+06	1.1246	0.53552
ULA1	1216	L17	DTL	GUUUAGAAUGGAUGGCUCAC	CUUACAAGUUUAAGUUCACC	UUUUGAAAGGUUACAGCAGC	17400770	9.06213e+06	2.18424	1.11678
ULA1	1216	M17	DTX1	ACCGUGGCCUGGCCGUGACA	CCCGGGCCACGUUCUGCGGU	UGGCCGUGUAGGGCCGCCAG	8.84289e+06	4285596	1.11001	0.528141
ULA1	1216	N17	DTX2	UAGGCACCAUGCGGGCUGUG	AGCCAGCGUCUGUGACUAUC	AGCCAGCGUCUGUGACUAUC	8547566	4.29192e+06	1.07294	0.528919
ULA1	1216	O17	DTX3	UCCAGAAUGGCAGCCUGUGG	CAGGAAGUCCCACACGGGCU	CAUCUAUGAGGAUGGACACA	9543105	4642531	1.1979	0.572128
ULA1	1216	B18	DTX3L	CGCACGAGGAGCGGGGACGG	AGCUCUAAGUCCUCGGGCGG	AACUCCACCCGGAAGGUGCC	8820567	4.17925e+06	1.10721	0.515035
ULA1	1216	C18	DTX4	GCUGCUUCUCAUAGGCAUGC	GUAAUUGACUUCAACACCAU	GGUAGAUGAGGUCGAGGCGC	1.00201e+07	4.39946e+06	1.25778	0.542172
ULA1	1216	D18	DUSP1	GGCCCAUGGCGCCCUUGGCC	GCCGGCGUUGAAAGCGAAGA	GAAGUGGGCACCCUGGACGC	9789763	4.57346e+06	1.22887	0.563616
ULA1	1216	E18	DYNC1LI1	GUCCUCGUCGUCGCCUGCCG	UAAGUCGAGGAUAAUCCCGG	CCGACCAAGAUGGCGGCCGU	9429374	4.77504e+06	1.18363	0.588458
ULA1	1216	F18	DZIP3	UAAUGUCUUCUAGAACAAAC	CUUCUAAUAGUAGGUUAACA	AUGUGAGGAACCACACCUUU	8.54404e+06	4.53665e+06	1.0725	0.55908
ULA1	1216	G18	E4F1	UUGCGACAUGGAGGGCGCGA	AAGCCCAGGCCGAAGCCGGG	CCGGCGCCCUUCAGCGAGGA	10073380	4717742	1.26447	0.581397
ULA1	1216	H18	EGF	CUUUAUAGAGCAGAUCUCGA	UGCUUGAUAAGCGGCUGUUU	UGCUCCUGUGAUUAUGAUGG	8.79552e+06	4.54916e+06	1.10406	0.560621
ULA1	1216	I18	EIF3F	CUCUUAGGUGGCUGUUGACA	CCUCCCCAACUUACCAGCCC	GGUGUCUUUUGCUACUGGAC	8.29531e+06	2.76866e+06	1.04127	0.3412
ULA1	1216	J18	ELOB	ACAAGGUGGGUCCCGCGGGC	GAACUGAAGCGCAUCGUCGA	GGAUCAUGAGGAACACGUCC	9007218	4.68114e+06	1.13064	0.576886
ULA1	1216	K18	ELOC	AGACAGAACUGUGCUUACCU	UUACUUUACUUUAGAUGGAG	UUACUUUACUUUAGAUGGAG	8616605	4.62318e+06	1.0816	0.569744
ULA1	1216	L18	ENC1	GGAACUCUGCACAUGCAUCC	UUCAUUGAUGAUGACCCGGG	UUCCAUCCACCCAGAAGUCU	8.99123e+06	4.70901e+06	1.12863	0.58032
ULA1	1216	M18	ENY2	UGGCUGGAAGGAUCAGUUGA	UUCUGAUCAGGAUUGGUUUG	UUCUGAUCAGGAUUGGUUUG	9.40825e+06	5.04474e+06	1.18098	0.621695
ULA1	1216	N18	EP300	AGAUUUUCUCAGCUAGAAGG	GGAACCAUGCCUGCAGCAUU	CUAGAAGUCAUUCCUGGUUG	10168368	4.43385e+06	1.27639	0.546411
ULA1	1216	O18	EPAS1	UUAGGAGUAGCUCGGAGAGG	GACGGAGGUGUUCUAUGAGC	GAUUGCCAGUCGCAUGAUGG	9525817	4593834	1.19573	0.566127
ULA1	1216	B19	EPOP	GGACGCCCGGGGCUUGGCAA	AAUUCCUGGGUCCCCCGACA	UGCGCCCCGCCUGGCAGUGC	10213483	4.85803e+06	1.28205	0.598685
ULA1	1216	C19	ERCC8	CAGAUUGCUUUGUAGGAUAA	UUGAUAAAACUCUGAAAGUA	ACACUGUAUCUGUGAACAUC	8.59836e+06	4.09374e+06	1.07932	0.504497
ULA1	1216	D19	ESR1	CCACACCAAAGCAUCUGGGA	GAUCCCCCUGGAGCGGCCCC	CGCGGCGUUGAACUCGUAGG	9277300	4.68184e+06	1.16454	0.576972
ULA1	1216	E19	FAM175A	GGGCUCUUCCCAGGCGACGC	CCGAGUCCGUGUUGAGGUGC	GGAGGGGGAGAGUACGUCGG	9.54891e+06	4923764	1.19863	0.606786
ULA1	1216	F19	FAM175B	CUUUUCUUUCAGAAAGUCAU	GUCGGGCACGCCGAGGAUGC	GUGAGUGGAAUUGUUGGCAG	8.53031e+06	4.39026e+06	1.07077	0.541039
ULA1	1216	G19	FANCF	AAGUUCGCUAAUCCCGGAAC	CGCUCCAGAGCCGUGCGAAU	AGCGCGCCCACUGCAAGGCC	9672596	4.67141e+06	1.21416	0.575687
ULA1	1216	H19	FANCI	AUAAGGUUCCCCCUGCUCUG	CACUUGUUGUAUCCAGUUGG	GAUCAUAGGAUUACUGAUGC	8.6676e+06	4591169	1.08801	0.565798
ULA1	1216	I19	FANCL	ACGCAGAAUUGCAUUAGGUA	UGAAAUCGAUGAGAAGACCU	CUGACUAUAAAUGCUUAUUA	8.90647e+06	4.3993e+06	1.11799	0.542153
ULA1	1216	J19	FBXL12	GGGUCCUCAAGGUGCUGGGC	UCAACAGAGCAGGGGACAAC	CCGGCUCCAUUCCCUGCGGA	8989635	4.00932e+06	1.12843	0.494093
ULA1	1216	K19	FBXL13	ACCUGAAAGAGCAAUAUUAC	ACUUCAGAAGAACUUCGUUC	AUGAACUUCAAUUGAAAAAA	8592735	4.33525e+06	1.07861	0.534259
ULA1	1216	L19	FBXL14	CCACACCGACUUGUGGUAGG	GCCCCUUGUCCCGGACGUCC	CCACAUCUCAUGCCUGUUCC	8968414	4.56445e+06	1.12577	0.562506
ULA1	1216	M19	FBXL15	UGCUCCCACACGUCCUGAAC	AGCGCGUUAGCCGGGCCUUC	GCGUCGCUUCGAUGCCGCGC	8989139	4.61186e+06	1.12837	0.568348
ULA1	1216	N19	FBXL16	CAGCUGCGAGAUGGCCGCGA	GGUGAUGCGCGCGCUCAGGC	GUUAUGCUUGAACAGAUGCA	8.68158e+06	4.51221e+06	1.08976	0.556068
ULA1	1216	O19	FBXL17	GAAAGUGCAUGUAGGCAACC	GCUGUAUACCUAAGAAGUCC	UGUCGCAGUAUGUCUGAUAA	8791160	4.36194e+06	1.10352	0.537549
ULA1	1216	B20	FBXL18	CAGCUGGCUGGCGUCGAAGC	GCGCCUCUCCAAGAUGCUCU	CGUGGCCCGCUGCCGCAGCC	8.26945e+06	3.93175e+06	1.03803	0.484534
ULA1	1216	C20	FBXL19	UGCCUCUUGUGUGGGGAGGC	GAAAUUUGGUUUGAGCCUCA	UCACCUUCAGGCAGCCGGGG	9004701	4.14205e+06	1.13032	0.51045
ULA1	1216	D20	FBXL2	CAGUGAGGGCUGCCGAAACC	GAAGGAUGGCAUCGAGGCAC	GCUCCUGAGGGGCUGCACAC	1.03723e+07	4.89889e+06	1.30199	0.603721
ULA1	1216	E20	FBXL20	CGUGCAGCCUUUUAAGAAUA	GAAUGCCAUCCUUGGUUACU	AAGUGAGGGAUGUCCACUGU	9.15744e+06	5080474	1.14949	0.626098
ULA1	1216	F20	FBXL22	GCACAUAACCCAGCUCAACC	UGUUUGAGGACCCCGCACUC	CCAGGAGGAAGUUGUCCUUC	9.34437e+06	4.8263e+06	1.17296	0.594775
ULA1	1216	G20	FBXL3	GAGGCAAAUAUUUAAAUACU	GCAUUCUCAGACUUGUGAUU	UUUCGGAAUAGGAUGAAACG	8.53062e+06	4.38627e+06	1.07081	0.540547
ULA1	1216	H20	FBXL4	UGGACUACCUCUGCAUUGAG	UUCUCCUCUUGUAGCUGUCC	CAUGGUCAGAACUGUUAACA	8.61065e+06	4.40687e+06	1.08086	0.543086
ULA1	1216	I20	FBXL5	GAAGUUUUUUAAAUAUUCCG	GAUACUGCAGAACUCCUUAG	GGUUUUUCAGCCCAUGUUAA	8.22542e+06	4.35688e+06	1.0325	0.536925
ULA1	1216	J20	FBXL6	CUGCUGGUGCUGUCCGAACC	CCGGUCCCACCACCAGUCCU	GUCGGACCUGCCGGGAGGCU	1.01244e+07	4933272	1.27088	0.607958
ULA1	1216	K20	FBXL7	AGGAGCAGGCCAGCAUAGAC	CAGCGGCACAGCUGGUUGGU	CCUGGGACCCGCGGCUCUGG	9.77711e+06	4.88706e+06	1.22728	0.602263
ULA1	1216	L20	FBXL8	UCCCUCUCCAGGCUCGGCCA	GAGACCGUGCUGCCGCCGCC	UGUGGCACGACACAAAAAUC	8777892	4.43802e+06	1.10185	0.546925
ULA1	1216	M20	FBXO10	UCAGUCUCGACAGCACCCGC	CAGGUCGGGAAGGUGCAAGU	UAGGUGACCAUGGAGGCUGG	9257421	4.63107e+06	1.16204	0.570716
ULA1	1216	N20	FBXO11	GUUUUUACUUACCACAAAAU	CUUCUCUUACUUGCUGGAAC	ACCUGCUGAACAGUAUCUUC	9.15891e+06	4.23231e+06	1.14968	0.521573
ULA1	1216	O20	FBXO15	UCACCUGCACCCAAAGGCCC	UGGGCCCGCGCAGCGUCUGG	CUCCUUGUCUCUAUGGCGAC	8.63614e+06	4.36079e+06	1.08406	0.537408
ULA1	1216	B21	FBXO16	GAAGCUUGGUUGUAAAGUCC	UCGACAGCAGAACUUUUGCU	UGUGUUUCCAGUUUGACAAA	9.2732e+06	4.72907e+06	1.16403	0.582793
ULA1	1216	C21	FBXO17	GCCCAGCAACGAAGACAAGG	GCCCUCGGCGCUGCGGUCGC	CCUGGCGCGACAUAGUGGAC	9536360	4786925	1.19706	0.589923
ULA1	1216	D21	FBXO18	GACAGCUGUCAGGACUCUGA	UGCCUCAGGAAGGCAGUGCA	GAAGCGGUCUUGGUCCUCUG	9271964	4.62407e+06	1.16387	0.569853
ULA1	1216	E21	FBXO2	GCAGGCCUGCACCAGCUCGG	CAGCUCGUCCAGGUACGCGG	CCAGCCCGAGGAGGCAAGCC	8.39131e+06	4.57572e+06	1.05333	0.563895
ULA1	1216	F21	FBXO21	CACCUUAAUAAGAAGUGACU	UUGACAAUUGCUCGGCAGUU	UAGGUUUUGAUUCGCAGAAC	8.21714e+06	4.03406e+06	1.03146	0.497143
ULA1	1216	G21	FBXO22	AUGGAGCCGGUAGGCUGCUG	UCAACACGAAGGUGCUCCGC	GCAGCAACGCCUUGGCGGGC	9.01829e+06	7.35743e+06	1.13203	0.906701
ULA1	1216	H21	FBXO24	CAACAAGGUCUCUGACUGGG	UGUGCGAUGGGGAAGGCGUG	CUCCAGAACCCUGAUCUUGG	9.13987e+06	4.33324e+06	1.14729	0.534012
ULA1	1216	I21	FBXO25	UGAUUAAGCGAGGAUUGUGG	UGCAUUCUUAUUAGAGGAGU	CGCCUGGCAACAACAGCUAC	8878786	4.81584e+06	1.11452	0.593486
ULA1	1216	J21	FBXO27	GCCAGCCCCGGCACACUUGG	UCCAGCGCCUCUUCGGGUUC	CGGGGGGACCAUGGGCGCCU	9562847	4.81619e+06	1.20038	0.59353
ULA1	1216	K21	FBXO28	CCCCAAGAUGGCGGCAGCGG	GGGUGCUGUGGCGCGGGCGG	CAGCUGGUCCGGAGCCAGCG	9.86228e+06	4.7749e+06	1.23797	0.588441
ULA1	1216	L21	FBXO3	AGAGGAGGCGGUGAGGCAGG	UAGAUCCCGAUAGUCCAAAA	UAGGGUCAGCGGCGCCGUCU	1.61228e+07	7.83971e+06	2.02383	0.966136
ULA1	1216	M21	FBXO30	AGUUGCUUUUGACAUCAUGG	UGAAGUGGCACAAUUGGAUA	UGGUGUGCUGUACUAUGGAA	8520100	4551541	1.06949	0.560915
ULA1	1216	N21	FBXO31	GUCGGGGGCGGCUUGUGCGC	GUCUGUGUCCGGCUCGCUGU	GCGACGGGCCCACGCCGCAA	9196585	4.45328e+06	1.15441	0.548805
ULA1	1216	O21	FBXO32	GCGGGUCCCCUCACCUGCUG	CAGGAAGCGCUUCCAGCCGU	UGCCAUGCCAUUCCUCGGGC	9.26876e+06	4.50294e+06	1.16347	0.554925
ULA1	1216	B22	FBXO33	GCCAACGAGCUGAGAGCUGC	GCCGCUCAGAUAGUUCUCGG	GAAUUCCUCAUGCGCAAGUG	9.95577e+06	4.87992e+06	1.24971	0.601383
ULA1	1216	C22	FBXO34	GCCUCUGUCAGUUAUACAGA	CAAACUCACCUGCAAUUGUG	GAAUAGGACUCAGACACUGC	8.80165e+06	3.9704e+06	1.10483	0.489297
ULA1	1216	D22	FBXO36	GGCGUCCCAAGAUGGCGUCG	GUUACUGGUCACCCGGUCUC	ACUCCCUACCUGGCCCGGUU	8740272	4.39607e+06	1.09713	0.541755
ULA1	1216	E22	FBXO38	CCAUAUAGCUGUUCAACAUC	CAUGAGGCUUUUAGCAUUCC	GUGCACUCACCACUAAGUUU	9.02149e+06	4.12243e+06	1.13243	0.508033
ULA1	1216	F22	FBXO39	GCUCAGCAGAAUACAUCAUC	UCAGAUGCAUGUACCCUGGA	UCGUUAUCUGGAGCACCUGG	9068798	4.46337e+06	1.13837	0.550049
ULA1	1216	G22	FBXO4	GCGCGGCUCGCUUCCCGCCA	CGACUGGGGCCGCCUGGAGG	GCGUACGACCUCACGGGAGG	1.13139e+07	5.02869e+06	1.42018	0.619717
ULA1	1216	H22	FBXO40	GUGGCAGCUUAUUACCAGGC	GCUCUAAAGGGCAGAGGAGC	UGUGGCGGGACAUGGACAGA	9352467	4.49825e+06	1.17397	0.554347
ULA1	1216	I22	FBXO41	UCAGCGGGUGAGGGGGACGC	CGGCGGCGUCGAGCACGCCG	GCGCGAGAUCGAGAUCCCGC	10012810	4.85593e+06	1.25686	0.598427
ULA1	1216	J22	FBXO42	CGUCUCCUCUGGCUGGGGAA	CCUUGUGUUAACGGCCGCUG	GUUUCAGGAACGAGAGCUGG	8769476	3.85147e+06	1.10079	0.474641
ULA1	1216	K22	FBXO43	UUUUGAGUGGGAGAUUCUAA	GGGUGCUCAUAGAGUAAUGU	ACUAUCUUGAAAUGAAGAUG	9067137	4347334	1.13816	0.535749
ULA1	1216	L22	FBXO44	GGGGUUCGAGUUCUGGAGCC	UCUCUCUCGAGACCAGAGGA	UUAGUAAGAUCCGGGGACUU	8.13998e+06	4345193	1.02178	0.535485
ULA1	1216	M22	FBXO45	GCACGGCGAUGAGAACAGCG	UGUAGCUGGGCAGGUUGCAC	ACGCCGGGGAGCGGGACUGG	8964118	4.60576e+06	1.12523	0.567597
ULA1	1216	N22	FBXO46	AGGGCAGGCUGAUGGCUUGA	UGAGUAGGUGCCAAAGGGCC	UCAUCCCCCAGCAUGGACCG	9.44094e+06	4.53438e+06	1.18508	0.5588
ULA1	1216	O22	FBXO47	ACAAAUAUUUUAAAAUUAUC	AGCUGUUAUUCCAAGACCCU	AGUGAAAUUUGUAUUUAUUC	8.921e+06	3.99379e+06	1.11982	0.49218
ULA1	1216	B23	SMARCA2				5634726	2.18169e+06	0.707303	0.268863
ULA1	1216	C23	SMARCA2				5553575	2.29941e+06	0.697116	0.28337
ULA1	1216	D23	CUL1	CCCUCACAAUGUCGUCAACC	AUCUGGGACGACCUCAGAGC	CGUGUAGAGCUCCAUAUAUC	9.14706e+06	8.17639e+06	1.14819	1.00763
ULA1	1216	E23	CUL1	CCCUCACAAUGUCGUCAACC	AUCUGGGACGACCUCAGAGC	CGUGUAGAGCUCCAUAUAUC	9172326	7.5913e+06	1.15136	0.935523
ULA1	1216	F23	OR5M9	UAAGGCAAUGCCUAAUUUCA	AACCUGUAGCUCCUGACGAC	AUCACUCUGUUGGGAAAUAU	9.86492e+06	4568973	1.2383	0.563063
ULA1	1216	G23	OR5M9	UAAGGCAAUGCCUAAUUUCA	AACCUGUAGCUCCUGACGAC	AUCACUCUGUUGGGAAAUAU	9.72395e+06	4.62562e+06	1.22061	0.570043
ULA1	1216	H23	OR6N1	GAGCAAUGGACACAGGGAAC	AAUCUGGACACCCUGGAGAU	AGACCACCAGGAAUAUCAGC	9687664	4453709	1.21605	0.548858
ULA1	1216	I23	OR6N1	GAGCAAUGGACACAGGGAAC	AAUCUGGACACCCUGGAGAU	AGACCACCAGGAAUAUCAGC	10131552	4638353	1.27177	0.571613
ULA1	1216	J23	PLK1	GGCCCCGCACAUAGCGCCGC	CUCGGACGCGGACACCAAGG	UGCUGCUCAAGCCGCACCAG	1.05716e+07	3514384	1.327	0.433099
ULA1	1216	K23	PLK1	GGCCCCGCACAUAGCGCCGC	CUCGGACGCGGACACCAAGG	UGCUGCUCAAGCCGCACCAG	12097768	2.8313e+06	1.51858	0.348919
ULA1	1216	L23	DMSO+RNAiMAX				7922507	8101362	0.994478	0.998381
ULA1	1216	M23	DMSO+RNAiMAX				7.74453e+06	8.15572e+06	0.972137	1.00508
ULA1	1216	N23	Cmpd 4+RNAiMAX				4.10956e+06	4.12516e+06	0.515855	0.508369
ULA1	1216	O23	Cmpd 4+RNAiMAX				4.18695e+06	3.92119e+06	0.52557	0.483233
ULA1	1217	B2	SMARCA2				4.15482e+06	1570076	0.688074	0.261596
ULA1	1217	C2	SMARCA2				4.27033e+06	1.34125e+06	0.707204	0.22347
ULA1	1217	D2	CUL1	CCCUCACAAUGUCGUCAACC	AUCUGGGACGACCUCAGAGC	CGUGUAGAGCUCCAUAUAUC	7.29745e+06	5.83446e+06	1.20852	0.972101
ULA1	1217	E2	CUL1	CCCUCACAAUGUCGUCAACC	AUCUGGGACGACCUCAGAGC	CGUGUAGAGCUCCAUAUAUC	7136289	5.93177e+06	1.18183	0.988314
ULA1	1217	F2	OR5M9	UAAGGCAAUGCCUAAUUUCA	AACCUGUAGCUCCUGACGAC	AUCACUCUGUUGGGAAAUAU	8.29848e+06	3.50486e+06	1.3743	0.583957
ULA1	1217	G2	OR5M9	UAAGGCAAUGCCUAAUUUCA	AACCUGUAGCUCCUGACGAC	AUCACUCUGUUGGGAAAUAU	8380393	3.30759e+06	1.38787	0.551089
ULA1	1217	H2	OR6N1	GAGCAAUGGACACAGGGAAC	AAUCUGGACACCCUGGAGAU	AGACCACCAGGAAUAUCAGC	8.43842e+06	3.2146e+06	1.39748	0.535596
ULA1	1217	I2	OR6N1	GAGCAAUGGACACAGGGAAC	AAUCUGGACACCCUGGAGAU	AGACCACCAGGAAUAUCAGC	8.41834e+06	3.44369e+06	1.39415	0.573766
ULA1	1217	J2	PLK1	GGCCCCGCACAUAGCGCCGC	CUCGGACGCGGACACCAAGG	UGCUGCUCAAGCCGCACCAG	7.62675e+06	2.39861e+06	1.26306	0.399642
ULA1	1217	K2	PLK1	GGCCCCGCACAUAGCGCCGC	CUCGGACGCGGACACCAAGG	UGCUGCUCAAGCCGCACCAG	8991965	1.67582e+06	1.48915	0.279214
ULA1	1217	L2	DMSO+RNAiMAX				6.2945e+06	5.84631e+06	1.04242	0.974075
ULA1	1217	M2	DMSO+RNAiMAX				6.16073e+06	6021920	1.02027	1.00333
ULA1	1217	N2	Cmpd 4+RNAiMAX				3.27789e+06	2.91409e+06	0.542848	0.485528
ULA1	1217	O2	Cmpd 4+RNAiMAX				3.01407e+06	2.89345e+06	0.499156	0.482089
ULA1	1217	B3	ABL1	GGUUCAUCAUCAUUCAACGG	UGUCCCCCAACUACGACAAG	CCUCGUACACCUCCCCGUAC	7040283	3.10866e+06	1.16593	0.517945
ULA1	1217	C3	ABTB1	CGAAGGUGUUGGCCUCGCAG	AUCGCGUAGAGCCCGGCGGA	ACUAUGACGACUUCUUGCAG	7019118	3044380	1.16243	0.507235
ULA1	1217	D3	ABTB2	UUCGGCGCAGCAGCACCGCG	GAGCGAGCGGCACGAGUCCC	CAGAGUCGAGCUGUACGUCC	7174002	3.07523e+06	1.18808	0.512376
ULA1	1217	E3	ACTB	CCUUCCCAGGGCGUGAUGGU	CCUCCCGGUUUCCGGGGUGG	CAGCUCCCCUACCUGGUGCC	7.14367e+06	3.05866e+06	1.18305	0.509615
ULA1	1217	F3	ACTL6A	AUGGUGGUAGAAAGAGAUGA	UUAGUAUCUAUGUAGUAGGU	CCCAUUUUUUAGAGGUGAAA	5.82639e+06	2.90016e+06	0.964902	0.483206
ULA1	1217	G3	ACTR5	CGGCACGGGCGUCGCGGAAC	CGGGCCACUGCCGGUACCGC	CGGGACACGCCCAGCCAGCG	6.58538e+06	3.31071e+06	1.0906	0.551609
ULA1	1217	H3	ACTR8	CGCUGCAAGAGGUGCGGCUC	AGGAGCAGCGCGGCGUGAAG	CCGUAUCACCCUUCUCAGCC	7.41406e+06	3.44812e+06	1.22783	0.574504
ULA1	1217	I3	ADGRB1	GCUGGGACGCCGCGCGCGGG	GGCGUUGGCCGGGAACACGG	AUGUAGAGAGUGUAGCGCCG	8.69511e+06	3.71459e+06	1.43999	0.618901
ULA1	1217	J3	ADRB2	GCCGUUCCCGGGUUGCCCCA	ACCACGACGUCACGCAGGAA	CGUCAUGUCUCUCAUCGUCC	7.61535e+06	3318346	1.26117	0.552882
ULA1	1217	K3	ADRM1	AGGCGCGCUCUUUCCAAGCC	GUACUUGGUGGAGUUUCGGG	ACUCGCUUAUUCACUUCUGC	9.64442e+06	4.18062e+06	1.5972	0.696548
ULA1	1217	L3	AIMP2	GGUCUUUCCCCAGGAUUACG	GGCUGCUCUGUGAGCACUUC	UUCAGGCACGCUCUUGACCG	7037019	2.95347e+06	1.16539	0.492089
ULA1	1217	M3	AIRE	GACGCUUCAUCUGAAGGAAA	GGGUCAGCAGCCAGGACAGG	ACAACCUGGAGCGCUAUGGC	8.66097e+06	3.49034e+06	1.43433	0.581539
ULA1	1217	N3	AKT1	CGCCACAGAGAAGUUGUUGA	CCGCUCCUUGUAGCCAAUGA	UAGGGGAGUACAUCAAGACC	7062936	2.93031e+06	1.16968	0.488229
ULA1	1217	O3	AKTIP	UUUUCAGACACAGAAGCAAA	ACAAGCUCUGUACGCAAAGU	ACAAGCUCUGUACGCAAAGU	6.76062e+06	3.11702e+06	1.11962	0.519338
ULA1	1217	B4	AMER1	UGCUUCACUCAGGCCAUCGU	CGGAGCAAAGGUUCUGGGAA	ACUGCCAUGAAACUCUUUGG	7616985	2.94534e+06	1.26144	0.490733
ULA1	1217	C4	AMFR	GCCCGGGGUCCCCCGGCGCU	CCGCGCGCUCAGCCAGCCCG	UGAGGCCCGUGUAGGUGCGG	8.16012e+06	3.30949e+06	1.35139	0.551406
ULA1	1217	D4	ANAPC10	AAUGUAUUAAUUACCUGAAU	GGUGUUUUUAGGAUUUGGAG	GGUGUUUUUAGGAUUUGGAG	8.13175e+06	4.36544e+06	1.34669	0.727342
ULA1	1217	E4	ANAPC11	GCACUUAAUCUUCACCUUCA	AUCUGCAGGAUGGCAUUUAA	UCGGGGCCGCUCAGACAGCA	7.86334e+06	4.0517e+06	1.30224	0.675068
ULA1	1217	F4	ANAPC13	GAUCUGGCAGUAACUAGUGG	AGAAGACAAGCUGCCUUAUG	CUGCAGGAAAAUGGACAGUG	7.19535e+06	3.65658e+06	1.19161	0.609237
ULA1	1217	G4	ANAPC15	GGAGGUCUCUGUCUGUGCUG	AGCUCUGUCUCUUCCACACA	UCACACGAGGGAAGAGUGAG	8598432	4154577	1.42398	0.692209
ULA1	1217	H4	ANAPC16	UCCACUGACCCCACCAGCUG	GUGAAAAGGGCUUUCCGUGG	CAUGCUGCUUUCUGAAUAAU	7.77031e+06	3.62413e+06	1.28683	0.603829
ULA1	1217	I4	ANAPC2	AUCCGCAGAGUUCUCGCAUU	CCACGGGCUACACUCGGUCC	CAGCGGUGCAGUCCCGCCAA	7.49507e+06	2.61036e+06	1.24125	0.434921
ULA1	1217	J4	ANAPC4	ACAGGUCGGAAAACGCAACA	AGGAGAUUAUUUUCCUGGUC	ACUCACCUCGCCAGCUGUGU	6.70336e+06	3.1152e+06	1.11014	0.519035
ULA1	1217	K4	ANAPC5	CUGAACGAGAUGAGCCGCAC	CGCCAAUGUGUUCGGCAUCA	GUAGAGGCUCUCGUGGACGC	7.48456e+06	3.95994e+06	1.23951	0.659781
ULA1	1217	L4	ANAPC7	GCUGCUGAGGAGCCGCACGU	UGAAUGUGAUAGACCACGUG	CUGACUCGAAAAGCCGGUAG	7173169	3.46614e+06	1.18794	0.577505
ULA1	1217	M4	ANGPT1	GCUCCAGUUGCUGCUUCUGA	GACGAGUAACCAAGCCUUGA	AGAAAUGGAAGGAAAACACA	7.88381e+06	3.68334e+06	1.30563	0.613694
ULA1	1217	N4	ANKIB1	CAUCAAUGGUGAUGAAAACC	GGCUCCCCAUAAGAUGUAUU	AUGGAAUGAAUAAAAUAUUA	6.85283e+06	3.18476e+06	1.13489	0.530625
ULA1	1217	O4	ANKS1A	GCCUUCUAGGGAUGUGGUCG	GCCUUUUGAGUCAGCCACGU	GUGCGGUUGCUCAUCCAUCA	7.19328e+06	3336096	1.19127	0.555839
ULA1	1217	B5	APC	UGUAUAUCCAUGCGACAGUC	CCGAGCCUCUUUACUGCCCC	UCACAGCCUGAUGACAAGAG	6680720	3.10104e+06	1.10639	0.516676
ULA1	1217	C5	AR	ACUCCUUCAGCAACAGCAGC	GGGGGCUCCCACUUCCUCCA	CUCCUUGGCGUUGUCAGAAA	7.36706e+06	3.45322e+06	1.22005	0.575353
ULA1	1217	D5	AREL1	GGGGAAAUUACCUGGAUCCC	GCUCGCGGUCCUCAUUCUGG	AGGUGGAAUCACAGUGUCUG	7484000	3.5423e+06	1.23942	0.590195
ULA1	1217	E5	ARIH1	UCGCGCCAUGGACUCGGACG	GGACAGCGGCGCCGAGGAGG	GCUCCACCUCGCCCAGAUCC	9162564	4.45272e+06	1.5174	0.741883
ULA1	1217	F5	ARIH2	GGGGUCUGACAGCAAUGAAG	AGACGACCCUGGGGACAUAG	CUGGUACUCCUCGGGAUCAA	7897525	3.60665e+06	1.3079	0.600917
ULA1	1217	G5	ARRB1	GCUCGCCCAGCUUCUUGAUG	GUCGUUCCCACCGGCCCCCG	CCAGGUCCUCCCGGCCAUAG	8.22561e+06	4336701	1.36223	0.722553
ULA1	1217	H5	ARRB2	AUAGCGGAAGGCGCAGGUGA	GAUGAACAGGUCUUUGCGGA	AGGCGGGUGGGGGGCCGGGG	9071929	3.78784e+06	1.50239	0.631106
ULA1	1217	I5	ARRDC1	CAUCCCCUUUGCAGCCAUCC	ACAAGGCUAAUGACACAGCG	ACCCUUGUCUGCCAGCGACA	7.39349e+06	3.58692e+06	1.22443	0.59763
ULA1	1217	J5	ARRDC3	UGUAUAGGCAGUAUUGGAGC	UCUCUUAAAAUUCAUGCAAG	GUAUCCCCACUAGAAUACAC	6.21376e+06	3280364	1.02905	0.546553
ULA1	1217	K5	ARRDC4	GCUGGGUGCGCGGCGGCCGU	CGCAAGGGCUGCUAUUCCAG	CGCGCGCAGGGCCACCGGCU	8.20855e+06	4.00573e+06	1.35941	0.66741
ULA1	1217	L5	ASB1	CAGGUCGUAAUCUGAAGGAG	UGGAGCACUGUGAGGACACG	AUAGGCUCCUGAGGGUCUGG	7.61839e+06	3966241	1.26167	0.66083
ULA1	1217	M5	ASB10	GCAGGGCGGUGCGGCCCCCA	GCAGCCGCAGGACUUCCGUG	CUGGUCUCUGACAUACGAAG	8.21116e+06	3.40306e+06	1.35984	0.566996
ULA1	1217	N5	ASB11	CUCUUCACUGCCUCAUGGAU	UGCAUGUGUCAAUGUGCUGC	GUCAAUGGAGUGACAGUUCA	6.92974e+06	3.53298e+06	1.14762	0.588642
ULA1	1217	O5	ASB12	AGCUGUCAACAUCAGCACCA	UAAGAAGCAGCCAAGCGCAA	CAAAAGCUGGUCCAAAGUAU	7.75033e+06	3.02588e+06	1.28352	0.504152
ULA1	1217	B6	ASB13	CGCAGCCAGUCUGCAGGGCC	CGAUCAGCUGUUGCAGCUGC	UUCCUUUCCAGGUUUCUGGG	7.60355e+06	3.65112e+06	1.25921	0.608326
ULA1	1217	C6	ASB14	GGACAUGGUGAAGCUUAUGC	AUCUGCGUUGUGCCAACGAG	GCUGCGUGACUGCUAUGACA	7.31643e+06	3478170	1.21166	0.57951
ULA1	1217	D6	ASB15	AGCAUCCUAUAAGACACUCU	UUGACUUUGGCAGUCAAAGC	UCAUUUACCAAUCAGAAGGG	7.55953e+06	3.61616e+06	1.25192	0.602502
ULA1	1217	E6	ASB16	UGCCGUCUGCUUGGUCUUGG	UGCUCGACACCUGAUCCGGC	GCACACAGUCAAACUGGGCU	7.05335e+06	3.48872e+06	1.1681	0.581268
ULA1	1217	F6	ASB17	GAUCACUGGCAAAAAUUCUG	AGACCCUCCCUACAGUUUUU	AGUAAAUCUACUAAAUUAUG	7.03809e+06	3.21024e+06	1.16557	0.53487
ULA1	1217	G6	ASB18	AGUUCUAUCACAGCGUCCAC	UGCCCUGGAUGCCAAAGAUG	CGACGUAACAAUGUCCAACU	8.36994e+06	3.75279e+06	1.38614	0.625266
ULA1	1217	H6	ASB2	UAGUAUGCGGCCUCGUGCAG	UUCCUUGAUCAUGGUCUUCA	GCCUGCGGACCCCUUGAUAA	6666219	3.26613e+06	1.10398	0.544182
ULA1	1217	I6	ASB3	CUGAAAAGAAGCCUGGUGCA	CAACACGGAGCAAAUGUUAA	UGUAUUACAGCUGUUGAAAA	6.73565e+06	3.47333e+06	1.11548	0.578704
ULA1	1217	J6	ASB4	UGAAGAGGGGUUUUCCCAUU	CUCAAUUGCUACUCCUUAAG	UUGGCACAGAGAAUGGAACU	7.15285e+06	3.68911e+06	1.18457	0.614655
ULA1	1217	K6	ASB5	ACUGGCGGCCUCAUGCGUUG	AGAAGCAGCUCUGCACAGCU	GUAAAUGCAAUCACGAUAGA	6.97995e+06	3.55243e+06	1.15594	0.591884
ULA1	1217	L6	ASB6	CCCAUGCCGCAAGAGAACGU	GGGCGUUGCUCACGCCUUCC	UCCUCGCUGGCGACAUAACU	6.73026e+06	3.49649e+06	1.11459	0.582563
ULA1	1217	M6	ASB7	UGUUACACCAUCAUUGUCGA	GACAUCCCCAGCAGCCACCG	CCAUUCGCAUCUCGGCCAUU	8.48645e+06	3.9529e+06	1.40543	0.658607
ULA1	1217	N6	ASB8	GCACACUCACCCCUCUGAUG	AAUUGUUCGGAUUAAGCGCU	CCUUGAUGAGUUCCAGUAUG	8.85512e+06	3.64982e+06	1.46649	0.608109
ULA1	1217	O6	ASB9	UACCUCUCCUAGCAGCUUCA	GUGAAUUUGCUUCUGCAGCA	UGAAUGGUGUGACAGCAGAC	7.39435e+06	3.52969e+06	1.22457	0.588095
ULA1	1217	B7	ASXL1	AGAACAAGCAGGGGUUGCUA	UAGCCUCCCCAUCCUUGUAG	UCUGCAGCACCCGACCUGGA	7051954	3.41933e+06	1.16787	0.569707
ULA1	1217	C7	ASXL2	AGUUCGGCUGCACUUCACCU	CACUCUGACUGGGAGACUAC	UGGAUUUUGGUUGUUCAGCU	7.56105e+06	3.43596e+06	1.25218	0.572477
ULA1	1217	D7	ATG3	GGAGAAAGCGGGGACUCCUG	CCCUGGCCUGGCUUACCUUG	UACUGUGAAGGGAAAGGCAC	8.22584e+06	3.56796e+06	1.36227	0.594471
ULA1	1217	E7	ATG5	AAGAAAAAGCUGUAAGAACU	AUCAGGAUGAGAUAACUGAA	AAGAUGUGCUUCGAGAUGUG	7.03953e+06	3.594e+06	1.16581	0.598809
ULA1	1217	F7	ATG7	AGAAAUAAUGGCGGCAGCUA	UGCCCCUUUUAGUAGUGCCU	GAAGCUGAACGAGUAUCGGC	7.03878e+06	3.52407e+06	1.16569	0.587158
ULA1	1217	G7	ATM	UAAUGAAGAUACCAGAUCCU	AUUACAGUGUCCCUUGCAAA	AAUCAUUCUGUGACUUCUGA	6.76037e+06	3.51589e+06	1.11958	0.585795
ULA1	1217	H7	ATXN3	AGAUUAUCGCACGUUUUUAC	UGCACAUCAGCUGGAUGAGG	UGCCUGAAUAACUUAUUGCA	7346499	3.55562e+06	1.21664	0.592415
ULA1	1217	I7	ATXN3L	AAAUGCAAGAUACUCUUCAC	AUCAGCUAGAUGAAGAAGAG	AUCUUUCAUGAGAAACAGGA	6.96067e+06	3.41038e+06	1.15275	0.568216
ULA1	1217	J7	ATXN7	CCUUUGCUUUUGGACAGAGA	CAACAACUUGGAACUUGAUG	CUGAAUGGGAUGCAUUGGCC	7404678	3.30956e+06	1.22628	0.551418
ULA1	1217	K7	ATXN7L3	CUCACCGGCGGUUGGCGAUU	GCAAUGCUGCGACUGCAAUU	GAUCGUGGACCAGCCGGGCU	8.52227e+06	4.01348e+06	1.41136	0.6687
ULA1	1217	L7	AURKA	UAAGUGUUCAUUUAUUGUCC	AUUCUGGAAUAUGCACCACU	CCUAAUAUUCUUAGACUGUA	9.95155e+06	3019675	1.64806	0.503119
ULA1	1217	M7	AURKB	UGACGAGCAGCGAACAGCCA	UCUAGAGUAUGCCCCCCGCG	UUGUAGAGACGCAGGAUGUU	1.04352e+07	4.44475e+06	1.72817	0.740556
ULA1	1217	N7	AVPR2	AGCUCCGCCCGGGCUAGCAG	GAGCAAUGGCCUGGUGCUGG	CCAGGUCGGCCAGGCACAAG	7.046e+06	3.30797e+06	1.16688	0.551153
ULA1	1217	O7	AXIN1	UGAACAGGCUUAUCCCAUCU	CACCCCACCAUACUUGAAGU	CAGAUCCGAGCGCCUCGGAG	7.01782e+06	3.27321e+06	1.16221	0.545362
ULA1	1217	B8	AXIN2	UGUCAGCCAGGGGUGGGCAA	GGGGCCGCGGGGCAUCCUCA	CACCAUGAGUAGCGCUAUGU	7.66282e+06	3.52874e+06	1.26903	0.587936
ULA1	1217	C8	BABAM1	CCACACAGGAGCCAUGGAAG	AGGAGCACUCGGCAGAGCCU	AGUAGGGGCACAGGCCAGCG	7.84713e+06	3.46779e+06	1.29955	0.577781
ULA1	1217	D8	BACH1	AAUGUCUCUGAGUGAGAACU	UACUCAGCCUUAAUGACCAG	CGCUCACCGGUCCGUGCUGG	6.64334e+06	3.18336e+06	1.1002	0.530391
ULA1	1217	E8	BACH2	CCAAAAAUAUUCACUGCAUG	AGAGAAUAUCCUUUUUCCGC	GUGGACUCAUACACAUACAU	7.18462e+06	3.62057e+06	1.18984	0.603236
ULA1	1217	F8	BAG5	UCUGUAUUUCAAUCCGGUGU	UAUUCAGCAAGCUAGGAAGC	AGAAUUACAAGAAACUGGAG	6.82491e+06	3.1288e+06	1.13027	0.521301
ULA1	1217	G8	BAP1	GGUGCCUACCAUGGUCAAUG	GUCAGCUAUGUGCCUAUCAC	UAAGGCCAUUCUGCUUCUCA	6225910	3042533	1.03106	0.506927
ULA1	1217	H8	BARD1	CUUCUCCAGGCGGUCGAGCG	CGCGGAACGAGGCUCGUUCC	GCGGGACGAUGCCGGAUAAU	8593634	3.83013e+06	1.42318	0.638151
ULA1	1217	I8	BCL10	CAAGGGUGUCCAGACCUUUU	ACAUCAAGUAGAAAAAGGGC	CAGCUAUGAUUUUCUCACAC	6513798	3.16763e+06	1.07874	0.52777
ULA1	1217	J8	BCL2	CCCGGUGCGGGGGCGGCCCC	CAUUAUAAGCUGUCGCAGAG	AUGGCGCACGCUGGGAGAAC	7.68442e+06	3.7045e+06	1.27261	0.617219
ULA1	1217	K8	BCOR	GCAAUGGACGAGAGGCGGGA	GGACCGACGUAGUGAGGUGG	GACUGGAGAAUACAGCGGCU	7524064	3.65403e+06	1.24605	0.608812
ULA1	1217	L8	BECN1	CUCGCUGACCUGUGAGUUCC	UCGUGUCCAGUUUCAGGGGC	GUCCAACAACAGCACCAUGC	7.76255e+06	4.02931e+06	1.28555	0.671338
ULA1	1217	M8	BFAR	CCAGGAUGUCGUAGCAGCAG	UCACUGCCUUGCUUUAUGGU	CCUGAGGAGAAUACUGACUU	6839147	3326953	1.13262	0.554316
ULA1	1217	N8	BHLHE40	GGCCAAGCACGAGAACACUC	CGAGACCACCCGGUGGAGGU	CAGCUCUCCGGCCAAAGGUU	8.0722e+06	3.58889e+06	1.33683	0.597957
ULA1	1217	O8	BIRC2	AUGCUGGAUAACUGGAAACU	GAAUCUGGUUUCAGCUAGUC	ACAUUCAUUAUCUCCCACCU	6992722	3227663	1.15806	0.537773
ULA1	1217	B9	BIRC3	AUGCUGGAUAACUGGAAAAG	CUCUGAACGAAUCUGCAGCU	AGAAGGAAAAGUAGGCUGAG	7.90656e+06	3.13187e+06	1.3094	0.521813
ULA1	1217	C9	BIRC5	CUGUCCCUUGCAGAUGGCCG	AAGAAACACUGGGCCAAGUC	ACUUACAUGGGGUCGUCAUC	11325618	4861362	1.87562	0.809969
ULA1	1217	D9	BIRC6	UCCACUUCUCUAGGUAUGGC	GUCAAGGCAGUGAAUGAAAG	UUAUUCACUUGCUUCACUUU	7.0173e+06	3.68765e+06	1.16213	0.614412
ULA1	1217	E9	BIRC7	GGAGACUCACUCCCAGCUGC	UGGCUCCUUCCAGGACCCGU	GUGUCAGCUCUCACCGGAGG	8.51514e+06	3.94069e+06	1.41018	0.656573
ULA1	1217	F9	BIRC8	UGUUCCCAAGGAUCUUCCUU	AUUUUAUGCUAUAGGUCAAG	CCAUGACGGGUUAUGAAGCC	7189371	3.77382e+06	1.19062	0.62877
ULA1	1217	G9	BLMH	CAUCUGUCUGAAGCGGGCCA	GGCAAGUACGAACUGGGGGU	UCUCCCAACAGGACUGAAUU	7.43548e+06	3305347	1.23138	0.550716
ULA1	1217	H9	BMI1	AACGUGUAUUGUUCGUUACC	CCAGACCACUACUGAAUAUA	GGAGUUGUAUAAUUUACUGA	7.51373e+06	3.84736e+06	1.24434	0.641022
ULA1	1217	I9	BRAP	CAUACCUGGGUUGGACUUCA	AUAAUCGCUACUUUCUCUCC	AGCCGGGGAAAUGUCUGAUG	7.35057e+06	3.61927e+06	1.21732	0.60302
ULA1	1217	J9	BRCA1	CUGCUAUUUAGUGUUAUCCA	UCCAUUCUUUUCUCUCACAC	GUAAGGAAACAUGUAAUGAU	7416669	3.56749e+06	1.22827	0.594393
ULA1	1217	K9	BRCC3	CACAGGUUGGCUGAACUGAC	UGAUACUUACCAACAUGUGA	AAUAACCAUACCCUAUGUAA	6.63668e+06	3558112	1.09909	0.59283
ULA1	1217	L9	BRE	AGGAUUUGAAGGAUUCCAGG	UGAGGCGGGAGCUCUCCCGG	UCCAUGUUCUCUCCAUACUG	8531972	4.10094e+06	1.41297	0.683273
ULA1	1217	M9	BTBD1	CUACAACUGGCAGGCGACCA	UGAGGCGGAGCCGGGCCCCG	GCUGGAGGAUGGCCUCACUC	10192798	4.93341e+06	1.68802	0.821973
ULA1	1217	N9	BTBD11	AGCGGCGGCAGCACGAGGAA	CAGCGACGACGUCCGCCAGG	CGAGCCGCGCCAGCUCAGGU	7.2167e+06	3.40469e+06	1.19515	0.567268
ULA1	1217	O9	BTBD18	GAUCAGCACACUUAGGAAGC	CGGGAGAGGCCAGCUCAGGG	GACAGGAUGCAGCAGUGAGC	9.33887e+06	3.53061e+06	1.5466	0.588248
ULA1	1217	B10	BTBD2	UCGGGGCGCCCACCUGUGCG	UGCGACGUGCACUUCCUGGU	CUCCUGCACGGUGGGCUUGC	7.26822e+06	3.28301e+06	1.20368	0.546994
ULA1	1217	C10	BTBD3	AGUUGGCUGGCUUUUUACGG	CAGUAACAACAACCUUAUCC	CGGCACUUACCUCUCUCUAA	7.1269e+06	3263263	1.18028	0.543704
ULA1	1217	D10	BTBD6	UUUCUCCUCCCAGUACGUCU	CGCCAGGUCUCCGUAGAACA	UAGAGUGGACUUACUUUAAG	7344522	3421835	1.21632	0.570124
ULA1	1217	E10	BTBD9	UAUGGUGCAGAGAUACUCAG	GCUGCUGGACUUUUUGAGCC	CUACUCAAAUAUAUCUACAC	9.06465e+06	3.62836e+06	1.50119	0.604533
ULA1	1217	F10	BTRC	CUACAGACAAAACUUGCCAA	AGCAAGCUAUGAAAAGGAAA	AUGUUGGUAAUGACACAUUU	7252687	3614137	1.20111	0.602164
ULA1	1217	G10	BUB1	GGUUUUGAAUUCCUCUCUGA	GGCUUCCAGAUGCCCCGCCC	UUUCUGUACAACCAUGGGAU	7.54632e+06	3.47959e+06	1.24974	0.579747
ULA1	1217	H10	BUB1B	UCACAGUGAAGCCAUGUCCC	AUGUACAACCUUUAAGGCAA	CUGCUGAAGAGUAUUGUUAC	6.97063e+06	3.66199e+06	1.1544	0.610138
ULA1	1217	I10	BUB3	CAGCUUGAACUCGUUAGAAC	UGUCCCAGGAGGAGACAAGC	GUGCUGGUACUUGAGCCGCA	7563064	3.38502e+06	1.25251	0.563991
ULA1	1217	J10	C18orf25	UGGAAGUUUCACUUUCAGAU	GGCCGAGUCGCCAAGGUUAA	GCUACUGAGGCAGAAACGGG	7.03318e+06	3.45442e+06	1.16476	0.575553
ULA1	1217	K10	C19orf68	UCAGCCGCUUCUUCGACGCG	UGCACCUGGCGCGCUGCCGC	CUACGUGCGGCUUGUGUGCA	7262726	3.50515e+06	1.20277	0.584006
ULA1	1217	L10	CACUL1	GGGAUCGACGAGGGGGGCGG	CCGCAGCCUCCCAGUUGUUG	GGAAAGCAUGGAAGAGGAGG	1.07543e+07	4.46735e+06	1.78101	0.744322
ULA1	1217	M10	CAND1	GUGAUGAUGAUGACAUGAGU	UGGAUGCUGUAGUUAGCACA	AGAGCGUGAAGAGAAUGUAA	8008184	5.90876e+06	1.32623	0.98448
ULA1	1217	N10	CAND2	GGCCACCAGCGACCUGAUGU	CGAGGACAGCGAGCGCAAGG	GAACGGUGAGGUGCAGAACC	7793363	3526618	1.29065	0.587583
ULA1	1217	O10	CAV1	GAUGUGAUUGCAGAACCAGA	CACAGUGAAGGUGGUGAAGC	GCAUCCCGAUGGCACUCAUC	6.70262e+06	2.97377e+06	1.11001	0.49547
ULA1	1217	B11	CAV3	GACGUGAUCGCAGAGCCUGU	CCGUCUGUUGUCCACGCUGC	AGAAGGAGAUGCAGGCGAAC	7.32449e+06	3.46442e+06	1.213	0.57722
ULA1	1217	C11	CBFB	UGCCUUGCAGAUUAAGUACA	UUCCAGAACGCCUGCCGCGA	CUUGUUGCGCGGGGCCGCGG	7.74566e+06	3.87975e+06	1.28275	0.646419
ULA1	1217	D11	CBL	GCUGGUAGGUAUCUGGUAGC	UGGAGAAAAUGAGUAUUUUA	GCAAACCAUAAGCCUCUUCA	7.00792e+06	3.54208e+06	1.16057	0.590158
ULA1	1217	E11	CBLB	AAGACUCUUUAAAGAAGGCA	AGUACUCAUUCUCACUGAGU	CGUAAAUGCUGAUAUGUAUC	6.67549e+06	3.54523e+06	1.10552	0.590684
ULA1	1217	F11	CBLC	CGAGGCUCCCAUGGCUCUGG	UGACUGCCCGGCCCAGGGCG	GGGGGACUCACGGACAGCCG	9315019	4.53509e+06	1.54265	0.755608
ULA1	1217	G11	CBLL1	AACACAGACAAUGAGUUACA	UGUUUGGAGAUGAGCUUUAU	AUGCCUGCAAAGGCUCCACC	6.75097e+06	3.41676e+06	1.11802	0.569279
ULA1	1217	H11	CBX8	CUCUGCGCGGCAGGUGCUGC	UUCGAAGGCCCUCCCGGGCC	ACUUCGAAACUCGUAAGUUU	6.5603e+06	3.65503e+06	1.08644	0.608978
ULA1	1217	I11	CCDC22	GGACUCGCCUGGAACUCCCG	GCCACCCUUCCAACAGGCUG	CAGACGGGCCGGGACCGGCC	6652088	3442313	1.10164	0.573536
ULA1	1217	J11	CCIN	UGUGACCGGGCUCAGGUAAC	AUGUGGAGGAGCUGCUUCGU	CACGGCAGAUGGACUUAAUA	6.62804e+06	3.24888e+06	1.09766	0.541308
ULA1	1217	K11	CCNA1	CACUGCAGCAACCCCAAGAG	GUGAGUAUCUGACAAGCAUC	CUAGGGCUGCUAACUGCAAA	6.46801e+06	3.28145e+06	1.07116	0.546734
ULA1	1217	L11	CCNA2	CAGUACCGCCAGCGCGGCCC	UGAUAUUCUCCUGGUCCUCU	UGUUGGGCAACUCUGCGCCG	9.4189e+06	4.34573e+06	1.55985	0.724057
ULA1	1217	M11	CCNB1	AAAUAAGGCGAAGAUCAACA	UGAGGCCAAGAACAGCUCUU	UACCUUCUUCAUAGGCAUUU	8.1295e+06	2.17882e+06	1.34632	0.363021
ULA1	1217	N11	CCNB1IP1	UGACAUCUCUGAGAAACUUA	GGUAACCUCCCCUUUCAUAG	UACAAUUUCAGCAAGGCUGA	7.58338e+06	3.58449e+06	1.25587	0.597225
ULA1	1217	O11	CCNC	AUUGGUUCAAAUUGUAUAGU	AGAGAAACUUUAAAUCCUUU	UUCUAGUUUGCAAUGGAUUU	7.50671e+06	2.99723e+06	1.24318	0.49938
ULA1	1217	B12	CCNF	UCUCGCUGAGCGGCUGAAUG	CGCCCUCCGUGGUCGGUGAG	CCAGACUCACCCUCUGCAGC	7.29436e+06	3.13317e+06	1.20801	0.522029
ULA1	1217	C12	CCP110	GUAGAGUGUUCCGUAUGGCU	CAUUGGUCCUCAUUAUCCAA	UUGGAACUAUCACAUUGCUU	8100996	3.55907e+06	1.3416	0.59299
ULA1	1217	D12	CD300LD	CUGAUCCAUUUGUUUUAACA	UUGACUGUGCAGUGUGCUUA	ACCAGUGAUUUUAGCGGCAA	7.0659e+06	3.41307e+06	1.17017	0.568664
ULA1	1217	E12	CDC14B	GCGGCGCGGGUCUUGCUGCG	CGACGAGCAGCGCCGCGAGC	CCAUGAAGCGGAAAAGCGAG	6886150	3.26648e+06	1.14041	0.544241
ULA1	1217	F12	CDC16	AGUUCUAUCUGUCUUCUACG	UUUGUAGCUGUAGGUAGCCA	CACAUGCUGACAGCACAAGA	9.80739e+06	5.6946e+06	1.62419	0.948798
ULA1	1217	G12	CDC20	GAAUGUACUGGCCGUGGCAC	UUUGCAAAUGGAGCAGCCUG	CACCUGCACCUCAGCACUGC	7.263e+06	1.70165e+06	1.20282	0.283518
ULA1	1217	H12	CDC20B	CGGUGUCUUCAGCACUGAUC	CUCUGUCCUCUGAUUCCUUU	UUAAGAGCAACUUUGCGAAG	7.93272e+06	3.803e+06	1.31373	0.633631
ULA1	1217	I12	CDC23	GUAGGCCCCGCUCCCGGGUA	ACAGCGAUUUCUCAGAUUUG	AAUGGCUGCGAGUACCUCCA	3.35227e+06	4.74181e+06	0.555165	0.790049
ULA1	1217	J12	CDC25A	GCUGGUCCAUAGUGACGGUC	ACGACGGGCUGCGACGCGGG	CCGGGCGCCGCCAUGGAACU	7.24157e+06	3.39049e+06	1.19927	0.564902
ULA1	1217	K12	CDC26	AAAGUUGUAUUCAUACCUCC	AAAGUUGUAUUCAUACCUCC	AAAGUUGUAUUCAUACCUCC	7857472	3.75933e+06	1.30127	0.626356
ULA1	1217	L12	CDC27	GGAAAAAAAGAAGAGGAGAU	AAUCAUUAUGUGAAAUAGGU	CUCUCCACAGCAAGACAGAU	7.99331e+06	3.39311e+06	1.32376	0.565339
ULA1	1217	M12	CDC34	GGGCACUAGCGGCCGAGCCA	CGAGGGAUUCCGCGUGACAC	CCCUCGUAGUAGGUGUUGGG	7.78507e+06	3.84294e+06	1.28927	0.640286
ULA1	1217	N12	CDC42	UUUCUUUUUUCUAGGGCAAG	AUUUGAAAACGUGAAAGAAA	AUUUGAAAACGUGAAAGAAA	6.58985e+06	3.5929e+06	1.09134	0.598627
ULA1	1217	O12	CDC73	UUUGUCUGAAGCUAUGUCAG	ACAUAACUGCCCUUAAACAG	UCUCUCUGCUGACAAUAUCU	8.18415e+06	3.73154e+06	1.35537	0.621725
ULA1	1217	B13	CDCA3	CCAACGCUUACCUCCACUGC	AGAGCGGGGAUCUGAGUCCU	CCACAGCCAGGCCUACCAGC	7.76704e+06	3.40081e+06	1.28629	0.566622
ULA1	1217	C13	CDK1	ACCCUUAUACACAACUCCAU	GGGUUCCUAGUACUGCAAUU	ACAACAUACCUGACUAUAUU	13281211	4403564	2.19949	0.733694
ULA1	1217	D13	CDK2	CUUCAUGGAGAACUUCCAAA	CAAAGCCAGAAACAAGUUGA	AGGCCACUCACGUGUCCAGG	9236692	4.17039e+06	1.52968	0.694843
ULA1	1217	E13	CDK5	GGGAUCUGACUGCUGCCCAC	CUGGAUGACGAUGAUGAGGU	CACCUACGGAACUGUGUUCA	7.44606e+06	3.88636e+06	1.23313	0.64752
ULA1	1217	F13	CDK5RAP3	UUCUCAUGUAGAUUGGCUGG	UGGCAGCAUUGAUCUUCUCG	ACAGGACCCAGACAGCAGCU	8.51886e+06	4.08658e+06	1.4108	0.68088
ULA1	1217	G13	CDK9	CUUCCUGCAGAUCCUGCAUA	UCGUGAUGGGGUCCUGAAGC	CACACGGUUGGUGUAGCGGU	8.47218e+06	4.39014e+06	1.40307	0.731457
ULA1	1217	H13	CDKN2A	GCCAGGGGCGCCCGCCGCUG	ACGAAAACCCUCACUCGCGG	GCGGCGAGAACAUGGUGCGC	6270961	3530567	1.03853	0.588241
ULA1	1217	I13	CENPF	CUUCAUCAUCUGUGUUCUCA	GCAGAGAAAUCUCUCCUAAU	AGUCGAUCAACUUUGCAAAU	7.7566e+06	3.74105e+06	1.28456	0.623309
ULA1	1217	J13	CENPS	UCGGCCCGCAGUGAUGGAGG	CCCCGUUUUCCUGUACCUGU	GAAAAGUACCCGGCAGCCCC	7.60678e+06	3.83197e+06	1.25975	0.638458
ULA1	1217	K13	CENPX	GACAUACCCCCGCCCUCCCG	CGCACCCCCACCCGCACCUU	CCUUCUAGGAGCUGGUGAGC	8.14168e+06	3677932	1.34833	0.612794
ULA1	1217	L13	CFTR	UAAGAGAGGCUGUACUGCUU	CGCUCUAUCGCGAUUUAUCU	CUCCUACACCCAGCCAUUUU	7.19579e+06	3.34323e+06	1.19169	0.557028
ULA1	1217	M13	CGRRF1	GAGCAAGACCCUGAUGGCUG	GCCGCUUUUCUACAUCGCGG	UUACCAUCCCAAUACCAGGC	6.9252e+06	3.39248e+06	1.14687	0.565233
ULA1	1217	N13	CHD5	GCCCCGCCCACCUGAGGAAC	GGUAAUCCUCCUCCGAGAAC	CAAGUCCUCGGGGCAGCUCA	6.70637e+06	3.47072e+06	1.11063	0.578269
ULA1	1217	O13	CHFR	UCCACUCCCGCUUCCUCAGG	UGGGGACGGCUCCUGCGUCU	AAUCCCGAUGGAGCGGCCCG	7.01485e+06	3.32185e+06	1.16172	0.553465
ULA1	1217	B14	CHP1	GCAGCCGGGAAGAUUUCCAG	GACUCACCCCUCUGGAAAGA	CUAAUCUGGAAUAAUGAUAU	7.61224e+06	3.64372e+06	1.26065	0.607094
ULA1	1217	C14	CISH	UCCUCUGGGUCCAGCACCUU	CAAGGGCUGCAUGACUGGCU	UUCUAGACCUCGUCCUUUGC	7612306	3.47606e+06	1.26066	0.579158
ULA1	1217	D14	CLSPN	AGUGAGGAAUGUCAGGUUGG	UGACAUUAGACCUUCACCUG	UGAGUCUUGCAGGAAGGAUU	8.06969e+06	3.57955e+06	1.33641	0.596402
ULA1	1217	E14	CLU	GCGUGCGUAGAACUUCAUGC	AGUGUGCAAUGAGACCAUGA	AGGAUGCCCUAAAUGAGACC	7659111	4.00496e+06	1.26842	0.667281
ULA1	1217	F14	CNOT4	GUAUUUACCUUUCUACAUGC	UCGGCAAAUCUGGUAGCCAC	ACAGGGUCUUCCUUCGCAUC	6.57371e+06	3.51384e+06	1.08866	0.585453
ULA1	1217	G14	COMMD1	CCUUCGCAGAGCAUGGCGGC	CUGUGAUGCCGGGGUACCCG	CGAGGAGUUCCGCCCCUUUC	7.94062e+06	3.84876e+06	1.31504	0.641255
ULA1	1217	H14	COMMD3-BMI1	GAAAGGCUUCCAGAUGCUGG	CGCCCGGAGGAGAAGCGUGA	GCCGAGCGGCUUACCUAACA	7.98445e+06	3.76637e+06	1.32229	0.627528
ULA1	1217	I14	COPS5	UAGUCCAGGGCUUCGCCGCC	CUGAGCUUCCUGCAUGUUGU	CCUCGGCGAUGGCGGCGUCC	7.07641e+06	6.86637e+06	1.17192	1.14403
ULA1	1217	J14	CRBN	CGCACCAUACUGACUUCUUG	GUGAUGAUGAUCCUGAUUCC	AUAGUACCUAGGUGCUGAUA	7.36386e+06	3.70829e+06	1.21952	0.617852
ULA1	1217	K14	CRY1	UUCGCCGGCUCCUCCAAUGU	CGCCCUGAAUGCACUCCUUC	UGGGGGUGAACGCCGUGCAC	7.82846e+06	3.64674e+06	1.29646	0.607596
ULA1	1217	L14	CTR9	UAGCUGGAAUACUACAAGCA	AAGUCAUCUGGUCUUUUUCA	GGCUCGGAAAGAAAAGAAUA	7583410	3642039	1.25588	0.606813
ULA1	1217	M14	CUL1	CCCUCACAAUGUCGUCAACC	AUCUGGGACGACCUCAGAGC	CGUGUAGAGCUCCAUAUAUC	7.15648e+06	6.1705e+06	1.18518	1.02809
ULA1	1217	N14	CUL2	AGGAGGCUGUUUACCUUUAA	CAAAGGAGUUAAUAACCCCA	CCUUGUUUUAGUGAUCGUGG	8.17169e+06	3.78498e+06	1.3533	0.63063
ULA1	1217	O14	CUL3	UACCUUAUUUAUGAGAUGUU	ACAAUGGUUUUGCAUAAACA	AUCCAGCGUAAGAAUAACAG	8.06365e+06	3.97287e+06	1.33541	0.661935
ULA1	1217	B15	CUL4A	CCAUAUUAUUAGUGAUAAAA	UCUCGCGCUCGAUCAGCAGU	GGUCAGACAGCAUGCCCAGG	7749490	3.242e+06	1.28338	0.540161
ULA1	1217	C15	CUL4B	AAUCAGACAGCAUGCUUAAA	GUGCAGAAUAAGACAAUUGA	UUAUUUUAGGGACAUGGGAC	6.63566e+06	3.37082e+06	1.09892	0.561625
ULA1	1217	D15	CUL5	UAAAAGCAUAUAUUGUUGAA	UCAACUAGAGAUUACUUUAA	GGAAGACAGUAUUGUUCGAA	6.9918e+06	3.61447e+06	1.1579	0.60222
ULA1	1217	E15	CUL7	CCUCCAGCACAGAUUUGUCC	GCGAGGAUGGCCAGGUCAUC	GGACGGGGGCUCUGGCCAAG	9269009	4.3563e+06	1.53503	0.725818
ULA1	1217	F15	CUL9	AGGUGAGCGGGCACUAUCUA	AGCUUUCCUCGAGAUCCAGG	CGCUGGUACGCAGGGCGGCC	6.92202e+06	3.65683e+06	1.14635	0.609277
ULA1	1217	G15	CYLD	AUCGUUCUGUGGGGCAUUCA	AGUUCUCUUUGUUGAUGAAA	GCUGAACCUCUCCUCACAAU	7.11173e+06	3.7451e+06	1.17776	0.623984
ULA1	1217	H15	DAXX	UCUGAGCCUCAUGGGGCCAG	CUCCCACCCACUCCCCAAUG	CAGCACGAUGAUGCUGUUAG	8.45262e+06	3.64644e+06	1.39983	0.607546
ULA1	1217	I15	DCAF1	UGUCUCGCAGUAGCACUGUC	GGGCAUCUUAAUGGACAGUA	CACAUUCCACAUCUUGGCCA	8.27681e+06	2.35341e+06	1.37071	0.39211
ULA1	1217	J15	DCAF10	CAGAGCAGGUAGCAAACAGC	CUUUACAUGGUCACACUAGC	UUAGUAACAUCAGGAUUUGA	6.21083e+06	3132474	1.02857	0.521913
ULA1	1217	K15	DCAF11	GUGACCAGAAGAUGGGAUCG	UCCGAGGGCUUGCCCCGAAG	UGAAGAUGUGGAUCUGGCCC	7.90804e+06	3.56349e+06	1.30964	0.593726
ULA1	1217	L15	DCAF12	AGGAGAGAGAGUUUCACCUU	AUGCAACACUCGAGAGUAGC	UAUACUAAGGAUCUCUUCAC	5.95566e+06	3.49192e+06	0.98631	0.581802
ULA1	1217	M15	DCAF13	CCUUAUCAUAGGUUAGAAUU	GAAUAUGUACUCGCUUUUGU	UCAUUAAAUUUGAUCAACAU	9113896	3.63348e+06	1.50934	0.605388
ULA1	1217	N15	DCAF15	CGCCCAGCUCGAAAUCGGAG	CGGGGGAGCCGGAGGGAAGC	CAAGCAGCUGGAGCGGGUCA	8778461	4.2496e+06	1.45379	0.708042
ULA1	1217	O15	DCAF16	UAAAAGGCACUUAACCUGCC	CAUAGAGUCCUCUUCUUCAG	UUCUGACAAGUGGUCAGGAG	7.04051e+06	3.49796e+06	1.16597	0.582807
ULA1	1217	B16	DCAF17	GGGCUUCCGGGUCGGGCCCA	GGCUGCUUCUCGCGCGACGC	CCUGGCACACCAGCGCCCGC	6.93972e+06	3.32337e+06	1.14928	0.553718
ULA1	1217	C16	DCAF4	AGGCAGAUACCAACAGUGAC	UCUGAAGACCCCUACGCUCA	UGGGCAACGUACCUUCCGGU	7280617	3.50495e+06	1.20573	0.583973
ULA1	1217	D16	DCAF5	AUAAAGGGGGCUCACCUCUG	AUUGGCUGUGGCCAACAACC	AGGCUGAUGGAUAGUUUGCC	8986575	4.51234e+06	1.48826	0.751817
ULA1	1217	E16	DCAF6	CUCCUACCCACACCUGUUGU	AGCGACUCCGCAGCCGGGAC	GCUGAGGUCGCCGCCUAGAG	7954367	3.86509e+06	1.31731	0.643976
ULA1	1217	F16	DCAF7	CCGUUUGCCGUGCAGGGACA	ACGCGAUGAACUGGAGUGUG	CGUGGAGGAGUACAACAACA	6.69439e+06	3552313	1.10865	0.591864
ULA1	1217	G16	DCAF8	UUGCGCUGUACACGGCGCCG	CCUCUUCCUCUGAGCGGUCA	AGAUAAGGACUCUGACAGCA	7327253	3.44463e+06	1.21346	0.573923
ULA1	1217	H16	DCST1	UCCCCCUCUUAGCGGUGCAG	CUGGUUCCUGUGGCGCCAGC	GGCAGGCGCUGGGGGGCUCC	9.67297e+06	4.47775e+06	1.60193	0.746054
ULA1	1217	I16	DCUN1D1	UUCUCAUAAGCCCAUCUCUU	GUGUAAAAGGAUCAUUGGAC	GUGUAAAAGGAUCAUUGGAC	6650611	3.52258e+06	1.1014	0.58691
ULA1	1217	J16	DCUN1D2	CGGCUGUACGGCAGGUACAA	ACUCCCUGUGGAGCGAGUCU	ACUGCUUAACGCAGAAUGAG	7576336	3.69825e+06	1.25471	0.616179
ULA1	1217	K16	DCUN1D3	CGAGGACGUUGGCAGCUGGC	UUGACGAGGAUAUCUCCACC	UCGACCCUGGGCAGCAAAAA	6.86296e+06	3.51339e+06	1.13657	0.585379
ULA1	1217	L16	DCUN1D4	UUAAUAAAGUGAUGCCACCA	CCUAUCAUGUCUACUUUUCU	UAGAAGACCCACACUGAAUU	6.91678e+06	3.93755e+06	1.14548	0.656049
ULA1	1217	M16	DCUN1D5	CUCCAGUUGUCCAGCAAAGG	UGGAGAUUUUACACUUUUUG	GAAGAGAAAAUCCCCUGGGG	7380303	4.04317e+06	1.22224	0.673648
ULA1	1217	N16	DDB1	ACCUCACCUGGACAUUGCCA	CUGUUUAUACUCCAGGAUGC	UGGUUUCCAGGGGGAGAGCA	1.17263e+07	5.38531e+06	1.94197	0.897267
ULA1	1217	O16	DDB2	UCUGAGUCACAUCUUCUGCU	CACCAUGCCGCAGCAUCGUC	UUCCUGGCCAUCUGUCCAGC	6.96321e+06	3.11967e+06	1.15317	0.519779
ULA1	1217	B17	DDX58	CUUGUGAACAACCUUAAAAA	UCUCAACAAUCUGUUCCACU	UUUCCCAGGUAUAGAGUUAC	6316821	2.95949e+06	1.04612	0.493091
ULA1	1217	C17	DERL1	UACCUGAAAGCGAUAAAGGA	GCCGACCAAGGGCACGGCGA	AGAUGUCGGACAUCGGAGAC	7.17416e+06	3.52678e+06	1.1881	0.587609
ULA1	1217	D17	DET1	AUUACCAAUGUUGCGGCCAA	GCUGGUCAUUGCCAUUGGAC	UCUUGAAAUCUAUGAGUACC	6742050	3.55457e+06	1.11654	0.59224
ULA1	1217	E17	DISC1	UGGCGAGGAGUCCCACCACU	AAACAGGGCUCCGGACCAAG	GAGGAACCUCGGCGCACUUU	7.44894e+06	3.78109e+06	1.23361	0.629981
ULA1	1217	F17	DMWD	AGGCGGCACCGGAGUCUGGG	GGUUUCUACAAGCUACUCCC	GCAGUCCCCCAUGGCGGCGC	8630765	3.95649e+06	1.42933	0.659204
ULA1	1217	G17	DNAJA1	AACUUACUACGAUGUUUUGG	UCACCUUCUCUCCUUCAUUU	UAAUAGAAAUACUAUACGUC	6.43366e+06	3087709	1.06547	0.514454
ULA1	1217	H17	DNAJA3	CUGCGCGGUGCUCCACACGC	GUAGAGGGGCCCGGCCGCCC	GCGUCUUCCCUGACCUCUUG	8.09591e+06	3.44227e+06	1.34075	0.573529
ULA1	1217	I17	DNAJB2	UCCAGGAACUGGCCCAUCUC	CACCUUCCGCAGCCCCGAGG	CACCAAAGAGCUCUGCAAAA	8980932	3.96675e+06	1.48732	0.660915
ULA1	1217	J17	DPF1	GCCCACCUGACAGUCCAUAA	UCUACUGUGUGCAGAGACGG	CUGUGAAGCACCCCUGAAGA	8.28226e+06	4.06145e+06	1.37162	0.676693
ULA1	1217	K17	DPF2	CUUUGUAGUACUGCUCCCCA	GCACGCUGCGCUCAGCACAG	CCAGAUGUAACAAUUGCUCU	6.78843e+06	3.09796e+06	1.12422	0.516162
ULA1	1217	L17	DTL	GUUUAGAAUGGAUGGCUCAC	CUUACAAGUUUAAGUUCACC	UUUUGAAAGGUUACAGCAGC	17462203	6512574	2.89189	1.08508
ULA1	1217	M17	DTX1	ACCGUGGCCUGGCCGUGACA	CCCGGGCCACGUUCUGCGGU	UGGCCGUGUAGGGCCGCCAG	6.78937e+06	3.37325e+06	1.12438	0.56203
ULA1	1217	N17	DTX2	UAGGCACCAUGCGGGCUGUG	AGCCAGCGUCUGUGACUAUC	AGCCAGCGUCUGUGACUAUC	6.4005e+06	3.37596e+06	1.05998	0.562481
ULA1	1217	O17	DTX3	UCCAGAAUGGCAGCCUGUGG	CAGGAAGUCCCACACGGGCU	CAUCUAUGAGGAUGGACACA	7.50059e+06	3.19385e+06	1.24216	0.532139
ULA1	1217	B18	DTX3L	CGCACGAGGAGCGGGGACGG	AGCUCUAAGUCCUCGGGCGG	AACUCCACCCGGAAGGUGCC	7.04899e+06	3.13849e+06	1.16738	0.522915
ULA1	1217	C18	DTX4	GCUGCUUCUCAUAGGCAUGC	GUAAUUGACUUCAACACCAU	GGUAGAUGAGGUCGAGGCGC	7.4691e+06	3.68241e+06	1.23695	0.61354
ULA1	1217	D18	DUSP1	GGCCCAUGGCGCCCUUGGCC	GCCGGCGUUGAAAGCGAAGA	GAAGUGGGCACCCUGGACGC	8.29794e+06	3.88486e+06	1.37421	0.64727
ULA1	1217	E18	DYNC1LI1	GUCCUCGUCGUCGCCUGCCG	UAAGUCGAGGAUAAUCCCGG	CCGACCAAGAUGGCGGCCGU	7.27096e+06	3.70874e+06	1.20413	0.617927
ULA1	1217	F18	DZIP3	UAAUGUCUUCUAGAACAAAC	CUUCUAAUAGUAGGUUAACA	AUGUGAGGAACCACACCUUU	6.94895e+06	3.39181e+06	1.15081	0.565121
ULA1	1217	G18	E4F1	UUGCGACAUGGAGGGCGCGA	AAGCCCAGGCCGAAGCCGGG	CCGGCGCCCUUCAGCGAGGA	7.50332e+06	4.0129e+06	1.24262	0.668603
ULA1	1217	H18	EGF	CUUUAUAGAGCAGAUCUCGA	UGCUUGAUAAGCGGCUGUUU	UGCUCCUGUGAUUAUGAUGG	6.99594e+06	3.45777e+06	1.15859	0.576111
ULA1	1217	I18	EIF3F	CUCUUAGGUGGCUGUUGACA	CCUCCCCAACUUACCAGCCC	GGUGUCUUUUGCUACUGGAC	6687193	1930295	1.10746	0.321613
ULA1	1217	J18	ELOB	ACAAGGUGGGUCCCGCGGGC	GAACUGAAGCGCAUCGUCGA	GGAUCAUGAGGAACACGUCC	7.02151e+06	3.83437e+06	1.16282	0.638859
ULA1	1217	K18	ELOC	AGACAGAACUGUGCUUACCU	UUACUUUACUUUAGAUGGAG	UUACUUUACUUUAGAUGGAG	6605853	3.7955e+06	1.09399	0.632381
ULA1	1217	L18	ENC1	GGAACUCUGCACAUGCAUCC	UUCAUUGAUGAUGACCCGGG	UUCCAUCCACCCAGAAGUCU	6.94575e+06	3.45298e+06	1.15028	0.575313
ULA1	1217	M18	ENY2	UGGCUGGAAGGAUCAGUUGA	UUCUGAUCAGGAUUGGUUUG	UUCUGAUCAGGAUUGGUUUG	7.4576e+06	4109527	1.23504	0.684703
ULA1	1217	N18	EP300	AGAUUUUCUCAGCUAGAAGG	GGAACCAUGCCUGCAGCAUU	CUAGAAGUCAUUCCUGGUUG	7.76963e+06	3.61748e+06	1.28672	0.602722
ULA1	1217	O18	EPAS1	UUAGGAGUAGCUCGGAGAGG	GACGGAGGUGUUCUAUGAGC	GAUUGCCAGUCGCAUGAUGG	7.83544e+06	3.54567e+06	1.29762	0.590757
ULA1	1217	B19	EPOP	GGACGCCCGGGGCUUGGCAA	AAUUCCUGGGUCCCCCGACA	UGCGCCCCGCCUGGCAGUGC	8.64341e+06	3.52892e+06	1.43142	0.587967
ULA1	1217	C19	ERCC8	CAGAUUGCUUUGUAGGAUAA	UUGAUAAAACUCUGAAAGUA	ACACUGUAUCUGUGAACAUC	6.66326e+06	3.56514e+06	1.10349	0.594001
ULA1	1217	D19	ESR1	CCACACCAAAGCAUCUGGGA	GAUCCCCCUGGAGCGGCCCC	CGCGGCGUUGAACUCGUAGG	7.51312e+06	3.72704e+06	1.24424	0.620976
ULA1	1217	E19	FAM175A	GGGCUCUUCCCAGGCGACGC	CCGAGUCCGUGUUGAGGUGC	GGAGGGGGAGAGUACGUCGG	7.44734e+06	3.78766e+06	1.23334	0.631075
ULA1	1217	F19	FAM175B	CUUUUCUUUCAGAAAGUCAU	GUCGGGCACGCCGAGGAUGC	GUGAGUGGAAUUGUUGGCAG	7247531	3.65938e+06	1.20026	0.609702
ULA1	1217	G19	FANCF	AAGUUCGCUAAUCCCGGAAC	CGCUCCAGAGCCGUGCGAAU	AGCGCGCCCACUGCAAGGCC	7.54246e+06	3.83762e+06	1.2491	0.639399
ULA1	1217	H19	FANCI	AUAAGGUUCCCCCUGCUCUG	CACUUGUUGUAUCCAGUUGG	GAUCAUAGGAUUACUGAUGC	7.29026e+06	3.59658e+06	1.20733	0.59924
ULA1	1217	I19	FANCL	ACGCAGAAUUGCAUUAGGUA	UGAAAUCGAUGAGAAGACCU	CUGACUAUAAAUGCUUAUUA	7.12075e+06	3.5892e+06	1.17926	0.59801
ULA1	1217	J19	FBXL12	GGGUCCUCAAGGUGCUGGGC	UCAACAGAGCAGGGGACAAC	CCGGCUCCAUUCCCUGCGGA	7.06366e+06	3.54901e+06	1.1698	0.591313
ULA1	1217	K19	FBXL13	ACCUGAAAGAGCAAUAUUAC	ACUUCAGAAGAACUUCGUUC	AUGAACUUCAAUUGAAAAAA	6.49113e+06	3.39593e+06	1.07499	0.565809
ULA1	1217	L19	FBXL14	CCACACCGACUUGUGGUAGG	GCCCCUUGUCCCGGACGUCC	CCACAUCUCAUGCCUGUUCC	6.93377e+06	3.46658e+06	1.14829	0.577579
ULA1	1217	M19	FBXL15	UGCUCCCACACGUCCUGAAC	AGCGCGUUAGCCGGGCCUUC	GCGUCGCUUCGAUGCCGCGC	6.8287e+06	3.43684e+06	1.13089	0.572624
ULA1	1217	N19	FBXL16	CAGCUGCGAGAUGGCCGCGA	GGUGAUGCGCGCGCUCAGGC	GUUAUGCUUGAACAGAUGCA	6.96468e+06	3.35198e+06	1.15341	0.558485
ULA1	1217	O19	FBXL17	GAAAGUGCAUGUAGGCAACC	GCUGUAUACCUAAGAAGUCC	UGUCGCAGUAUGUCUGAUAA	6723388	3.08143e+06	1.11345	0.513408
ULA1	1217	B20	FBXL18	CAGCUGGCUGGCGUCGAAGC	GCGCCUCUCCAAGAUGCUCU	CGUGGCCCGCUGCCGCAGCC	6.11666e+06	2.69155e+06	1.01297	0.448448
ULA1	1217	C20	FBXL19	UGCCUCUUGUGUGGGGAGGC	GAAAUUUGGUUUGAGCCUCA	UCACCUUCAGGCAGCCGGGG	7689135	3.6826e+06	1.27339	0.613571
ULA1	1217	D20	FBXL2	CAGUGAGGGCUGCCGAAACC	GAAGGAUGGCAUCGAGGCAC	GCUCCUGAGGGGCUGCACAC	8.34596e+06	4.30436e+06	1.38217	0.717165
ULA1	1217	E20	FBXL20	CGUGCAGCCUUUUAAGAAUA	GAAUGCCAUCCUUGGUUACU	AAGUGAGGGAUGUCCACUGU	7.59614e+06	3.73374e+06	1.25799	0.622092
ULA1	1217	F20	FBXL22	GCACAUAACCCAGCUCAACC	UGUUUGAGGACCCCGCACUC	CCAGGAGGAAGUUGUCCUUC	7.01954e+06	4.13864e+06	1.1625	0.689554
ULA1	1217	G20	FBXL3	GAGGCAAAUAUUUAAAUACU	GCAUUCUCAGACUUGUGAUU	UUUCGGAAUAGGAUGAAACG	6.54434e+06	3.77443e+06	1.0838	0.628872
ULA1	1217	H20	FBXL4	UGGACUACCUCUGCAUUGAG	UUCUCCUCUUGUAGCUGUCC	CAUGGUCAGAACUGUUAACA	6.47677e+06	3.58066e+06	1.07261	0.596587
ULA1	1217	I20	FBXL5	GAAGUUUUUUAAAUAUUCCG	GAUACUGCAGAACUCCUUAG	GGUUUUUCAGCCCAUGUUAA	6.50191e+06	3.55511e+06	1.07677	0.59233
ULA1	1217	J20	FBXL6	CUGCUGGUGCUGUCCGAACC	CCGGUCCCACCACCAGUCCU	GUCGGACCUGCCGGGAGGCU	8.23588e+06	3.71972e+06	1.36393	0.619756
ULA1	1217	K20	FBXL7	AGGAGCAGGCCAGCAUAGAC	CAGCGGCACAGCUGGUUGGU	CCUGGGACCCGCGGCUCUGG	7.28206e+06	3.92503e+06	1.20597	0.653963
ULA1	1217	L20	FBXL8	UCCCUCUCCAGGCUCGGCCA	GAGACCGUGCUGCCGCCGCC	UGUGGCACGACACAAAAAUC	6.64161e+06	3.53903e+06	1.09991	0.58965
ULA1	1217	M20	FBXO10	UCAGUCUCGACAGCACCCGC	CAGGUCGGGAAGGUGCAAGU	UAGGUGACCAUGGAGGCUGG	7.75684e+06	3.53021e+06	1.2846	0.588182
ULA1	1217	N20	FBXO11	GUUUUUACUUACCACAAAAU	CUUCUCUUACUUGCUGGAAC	ACCUGCUGAACAGUAUCUUC	6.97526e+06	3.04616e+06	1.15516	0.507532
ULA1	1217	O20	FBXO15	UCACCUGCACCCAAAGGCCC	UGGGCCCGCGCAGCGUCUGG	CUCCUUGUCUCUAUGGCGAC	7.02249e+06	3486964	1.16299	0.580976
ULA1	1217	B21	FBXO16	GAAGCUUGGUUGUAAAGUCC	UCGACAGCAGAACUUUUGCU	UGUGUUUCCAGUUUGACAAA	7.65244e+06	3.33852e+06	1.26731	0.556242
ULA1	1217	C21	FBXO17	GCCCAGCAACGAAGACAAGG	GCCCUCGGCGCUGCGGUCGC	CCUGGCGCGACAUAGUGGAC	7.33111e+06	3.72367e+06	1.2141	0.620414
ULA1	1217	D21	FBXO18	GACAGCUGUCAGGACUCUGA	UGCCUCAGGAAGGCAGUGCA	GAAGCGGUCUUGGUCCUCUG	7497913	3.74313e+06	1.24172	0.623656
ULA1	1217	E21	FBXO2	GCAGGCCUGCACCAGCUCGG	CAGCUCGUCCAGGUACGCGG	CCAGCCCGAGGAGGCAAGCC	6.28251e+06	3.53825e+06	1.04044	0.58952
ULA1	1217	F21	FBXO21	CACCUUAAUAAGAAGUGACU	UUGACAAUUGCUCGGCAGUU	UAGGUUUUGAUUCGCAGAAC	6.40727e+06	3.30839e+06	1.0611	0.551223
ULA1	1217	G21	FBXO22	AUGGAGCCGGUAGGCUGCUG	UCAACACGAAGGUGCUCCGC	GCAGCAACGCCUUGGCGGGC	7.51598e+06	7.01306e+06	1.24471	1.16847
ULA1	1217	H21	FBXO24	CAACAAGGUCUCUGACUGGG	UGUGCGAUGGGGAAGGCGUG	CUCCAGAACCCUGAUCUUGG	7.82779e+06	3.90511e+06	1.29635	0.650645
ULA1	1217	I21	FBXO25	UGAUUAAGCGAGGAUUGUGG	UGCAUUCUUAUUAGAGGAGU	CGCCUGGCAACAACAGCUAC	6912280	3.54356e+06	1.14473	0.590405
ULA1	1217	J21	FBXO27	GCCAGCCCCGGCACACUUGG	UCCAGCGCCUCUUCGGGUUC	CGGGGGGACCAUGGGCGCCU	8.21088e+06	3.86549e+06	1.3598	0.644043
ULA1	1217	K21	FBXO28	CCCCAAGAUGGCGGCAGCGG	GGGUGCUGUGGCGCGGGCGG	CAGCUGGUCCGGAGCCAGCG	8108483	3.92899e+06	1.34284	0.654623
ULA1	1217	L21	FBXO3	AGAGGAGGCGGUGAGGCAGG	UAGAUCCCGAUAGUCCAAAA	UAGGGUCAGCGGCGCCGUCU	11959473	4.6038e+06	1.98059	0.767056
ULA1	1217	M21	FBXO30	AGUUGCUUUUGACAUCAUGG	UGAAGUGGCACAAUUGGAUA	UGGUGUGCUGUACUAUGGAA	6.4423e+06	3.48611e+06	1.0669	0.580834
ULA1	1217	N21	FBXO31	GUCGGGGGCGGCUUGUGCGC	GUCUGUGUCCGGCUCGCUGU	GCGACGGGCCCACGCCGCAA	6.90071e+06	3.68875e+06	1.14282	0.614595
ULA1	1217	O21	FBXO32	GCGGGUCCCCUCACCUGCUG	CAGGAAGCGCUUCCAGCCGU	UGCCAUGCCAUUCCUCGGGC	7.26554e+06	3.49516e+06	1.20324	0.582341
ULA1	1217	B22	FBXO33	GCCAACGAGCUGAGAGCUGC	GCCGCUCAGAUAGUUCUCGG	GAAUUCCUCAUGCGCAAGUG	7.99012e+06	3.4618e+06	1.32323	0.576784
ULA1	1217	C22	FBXO34	GCCUCUGUCAGUUAUACAGA	CAAACUCACCUGCAAUUGUG	GAAUAGGACUCAGACACUGC	6.75198e+06	3.52613e+06	1.11819	0.587502
ULA1	1217	D22	FBXO36	GGCGUCCCAAGAUGGCGUCG	GUUACUGGUCACCCGGUCUC	ACUCCCUACCUGGCCCGGUU	7.28109e+06	3.91725e+06	1.20581	0.652666
ULA1	1217	E22	FBXO38	CCAUAUAGCUGUUCAACAUC	CAUGAGGCUUUUAGCAUUCC	GUGCACUCACCACUAAGUUU	6781651	3.50704e+06	1.1231	0.584321
ULA1	1217	F22	FBXO39	GCUCAGCAGAAUACAUCAUC	UCAGAUGCAUGUACCCUGGA	UCGUUAUCUGGAGCACCUGG	6.93461e+06	3.69784e+06	1.14843	0.616111
ULA1	1217	G22	FBXO4	GCGCGGCUCGCUUCCCGCCA	CGACUGGGGCCGCCUGGAGG	GCGUACGACCUCACGGGAGG	1.00388e+07	3.84673e+06	1.66252	0.640918
ULA1	1217	H22	FBXO40	GUGGCAGCUUAUUACCAGGC	GCUCUAAAGGGCAGAGGAGC	UGUGGCGGGACAUGGACAGA	7.87891e+06	3.72723e+06	1.30482	0.621007
ULA1	1217	I22	FBXO41	UCAGCGGGUGAGGGGGACGC	CGGCGGCGUCGAGCACGCCG	GCGCGAGAUCGAGAUCCCGC	8147821	3.66021e+06	1.34935	0.609841
ULA1	1217	J22	FBXO42	CGUCUCCUCUGGCUGGGGAA	CCUUGUGUUAACGGCCGCUG	GUUUCAGGAACGAGAGCUGG	7646637	3.6431e+06	1.26635	0.60699
ULA1	1217	K22	FBXO43	UUUUGAGUGGGAGAUUCUAA	GGGUGCUCAUAGAGUAAUGU	ACUAUCUUGAAAUGAAGAUG	7.26716e+06	3.47582e+06	1.20351	0.579118
ULA1	1217	L22	FBXO44	GGGGUUCGAGUUCUGGAGCC	UCUCUCUCGAGACCAGAGGA	UUAGUAAGAUCCGGGGACUU	6.55482e+06	3.32929e+06	1.08554	0.554704
ULA1	1217	M22	FBXO45	GCACGGCGAUGAGAACAGCG	UGUAGCUGGGCAGGUUGCAC	ACGCCGGGGAGCGGGACUGG	7113074	3.52025e+06	1.17799	0.586521
ULA1	1217	N22	FBXO46	AGGGCAGGCUGAUGGCUUGA	UGAGUAGGUGCCAAAGGGCC	UCAUCCCCCAGCAUGGACCG	7.71892e+06	3.46791e+06	1.27832	0.577801
ULA1	1217	O22	FBXO47	ACAAAUAUUUUAAAAUUAUC	AGCUGUUAUUCCAAGACCCU	AGUGAAAUUUGUAUUUAUUC	6.9812e+06	3.36173e+06	1.15615	0.56011
ULA1	1217	B23	SMARCA2				4.36426e+06	1.5584e+06	0.722759	0.259651
ULA1	1217	C23	SMARCA2				4047144	1.63149e+06	0.670243	0.271829
ULA1	1217	D23	CUL1	CCCUCACAAUGUCGUCAACC	AUCUGGGACGACCUCAGAGC	CGUGUAGAGCUCCAUAUAUC	6.82276e+06	5.98279e+06	1.12991	0.996815
ULA1	1217	E23	CUL1	CCCUCACAAUGUCGUCAACC	AUCUGGGACGACCUCAGAGC	CGUGUAGAGCUCCAUAUAUC	6.88303e+06	5.91017e+06	1.13989	0.984715
ULA1	1217	F23	OR5M9	UAAGGCAAUGCCUAAUUUCA	AACCUGUAGCUCCUGACGAC	AUCACUCUGUUGGGAAAUAU	8.07709e+06	4.01741e+06	1.33764	0.669356
ULA1	1217	G23	OR5M9	UAAGGCAAUGCCUAAUUUCA	AACCUGUAGCUCCUGACGAC	AUCACUCUGUUGGGAAAUAU	7.46185e+06	3.89419e+06	1.23575	0.648825
ULA1	1217	H23	OR6N1	GAGCAAUGGACACAGGGAAC	AAUCUGGACACCCUGGAGAU	AGACCACCAGGAAUAUCAGC	7562835	3.50479e+06	1.25247	0.583946
ULA1	1217	I23	OR6N1	GAGCAAUGGACACAGGGAAC	AAUCUGGACACCCUGGAGAU	AGACCACCAGGAAUAUCAGC	7.33512e+06	3.68983e+06	1.21476	0.614776
ULA1	1217	J23	PLK1	GGCCCCGCACAUAGCGCCGC	CUCGGACGCGGACACCAAGG	UGCUGCUCAAGCCGCACCAG	7.54377e+06	2.64615e+06	1.24931	0.440884
ULA1	1217	K23	PLK1	GGCCCCGCACAUAGCGCCGC	CUCGGACGCGGACACCAAGG	UGCUGCUCAAGCCGCACCAG	7.31194e+06	1869677	1.21092	0.311514
ULA1	1217	L23	DMSO+RNAiMAX				5804498	6.10314e+06	0.961276	1.01687
ULA1	1217	M23	DMSO+RNAiMAX				5.89357e+06	6.03627e+06	0.976028	1.00572
ULA1	1217	N23	Cmpd 4+RNAiMAX				2.60251e+06	3.26774e+06	0.430999	0.54445
ULA1	1217	O23	Cmpd 4+RNAiMAX				2.40272e+06	2.94976e+06	0.397911	0.491471
ULA2	1216	B2	SMARCA2				4592577	1.53451e+06	0.74502	0.254958
ULA2	1216	C2	SMARCA2				4.21595e+06	1.53872e+06	0.683923	0.255658
ULA2	1216	D2	CUL1	CCCUCACAAUGUCGUCAACC	AUCUGGGACGACCUCAGAGC	CGUGUAGAGCUCCAUAUAUC	7.2905e+06	5.96304e+06	1.18268	0.990755
ULA2	1216	E2	CUL1	CCCUCACAAUGUCGUCAACC	AUCUGGGACGACCUCAGAGC	CGUGUAGAGCUCCAUAUAUC	6.81842e+06	5724677	1.1061	0.951152
ULA2	1216	F2	OR5M9	UAAGGCAAUGCCUAAUUUCA	AACCUGUAGCUCCUGACGAC	AUCACUCUGUUGGGAAAUAU	8.65173e+06	3742983	1.40351	0.621895
ULA2	1216	G2	OR5M9	UAAGGCAAUGCCUAAUUUCA	AACCUGUAGCUCCUGACGAC	AUCACUCUGUUGGGAAAUAU	7.82026e+06	3.94538e+06	1.26862	0.655522
ULA2	1216	H2	OR6N1	GAGCAAUGGACACAGGGAAC	AAUCUGGACACCCUGGAGAU	AGACCACCAGGAAUAUCAGC	7.90383e+06	3.81529e+06	1.28218	0.633909
ULA2	1216	I2	OR6N1	GAGCAAUGGACACAGGGAAC	AAUCUGGACACCCUGGAGAU	AGACCACCAGGAAUAUCAGC	7.9607e+06	3688084	1.29141	0.612773
ULA2	1216	J2	PLK1	GGCCCCGCACAUAGCGCCGC	CUCGGACGCGGACACCAAGG	UGCUGCUCAAGCCGCACCAG	8.03427e+06	2690594	1.30334	0.447041
ULA2	1216	K2	PLK1	GGCCCCGCACAUAGCGCCGC	CUCGGACGCGGACACCAAGG	UGCUGCUCAAGCCGCACCAG	8730912	2.3511e+06	1.41635	0.390635
ULA2	1216	L2	DMSO+RNAiMAX				6.20032e+06	6229477	1.00583	1.03503
ULA2	1216	M2	DMSO+RNAiMAX				6.13042e+06	5.85036e+06	0.994493	0.972034
ULA2	1216	N2	Cmpd 4+RNAiMAX				3.08173e+06	3.46955e+06	0.499927	0.576465
ULA2	1216	O2	Cmpd 4+RNAiMAX				3.09811e+06	2.95042e+06	0.502583	0.490211
ULA2	1216	B3	FBXW9	GCGGGUGUGGAUAGCUGCGA	ACUGAGAACGCGGGCCACGU	GGAAUCAUCGCACCGCCCUA	7.03221e+06	3.22331e+06	1.14078	0.535551
ULA2	1216	C3	FEM1A	CUGCGCCGAGUCCGGCAGCC	CGUAGCCGUCACGUUCCAUG	CUCCCCCUGCGACCUGCUCC	7053944	3.27268e+06	1.14431	0.543754
ULA2	1216	D3	FEM1B	UGUAUACAAGGCGGCCAGCG	AGCGACAUCCGCUAUCUGCU	AGCCCGCAAUGGACACGCAA	7.40081e+06	3.56987e+06	1.20058	0.593133
ULA2	1216	E3	FEM1C	GGCGGCCAUCAAGAGUGGCG	GUUGGCAAGCAAAUCCAAAG	AGCAGUAUUUAACGCAGCUC	7135751	3.41272e+06	1.15758	0.567021
ULA2	1216	F3	FGFR3	UGCUGGCCGGGCUCUGGGCC	AGCUGUCCCCCGCCCGGGGG	GCCCUCGGAGCGUGUCCUGG	6.85004e+06	3.63055e+06	1.11123	0.603214
ULA2	1216	G3	FKBP1A	CACGCAGGUCUGGCCGCGCU	UGCUGAGCCGAUGCGCGCGG	CUCACCGUCUCCUGGGGAGA	7.76832e+06	3.72412e+06	1.2602	0.618761
ULA2	1216	H3	FOXK1	CGACGUGAACUGGAUCUUGA	GGGGUACAGUGGCCGCAGCG	CGGGGCUGACCAUGCUCCGG	5.71325e+06	3.19427e+06	0.926819	0.530726
ULA2	1216	I3	FOXK2	ACUCCUGCCCCUCCAGCCCC	GCCAUCUGACCUCAAUUUAA	UUCAGGUGGAGACAGCCCGA	1.18265e+07	3.79671e+06	1.91852	0.630821
ULA2	1216	J3	FOXO4	UCCAACUCCACGUAUGGAUC	GGGGUUCGAAGUCGGGAUCU	UGGUUAGCGAUCUCUGGUCG	6.59451e+06	3.72677e+06	1.06978	0.619201
ULA2	1216	K3	FYN	GCGUGGAAGUUGUUGUAGUU	CAUAGCGGUACCCAGAGCUC	AAUGGGCUGUGUGCAAUGUA	7.3146e+06	3.61172e+06	1.1866	0.600086
ULA2	1216	L3	FZR1	GAGGGCCACACGGCACGCGU	GGCCUCCAGGGGCGCUGGCC	UCUGCAGGAUCAUGCGGUCG	6053794	3.38593e+06	0.982063	0.56257
ULA2	1216	M3	G2E3	AAUGAUAACUUCGUUUACAU	ACGCAAAAUUGCCAGUAAAC	UAUUGUAGUAUUAUAUCAUU	6.92429e+06	3.66686e+06	1.12328	0.609246
ULA2	1216	N3	GAN	GCGGGCGCCGCGAUGGCUGA	CGCAGAAGCGAGACUCCUCG	GCAGAAGAACAUCCUGGCGG	6.87367e+06	3.5646e+06	1.11506	0.592256
ULA2	1216	O3	GATA3	AUCCAUGAAGCAGAGGCGGG	UCCAAGACGUCCAUCCACCA	AGGAGGAGGACGAGGCCGGG	8422416	3.89368e+06	1.36631	0.646932
ULA2	1216	B4	GBP6	UUGGCAGUUGCCAUGGAAUC	CAAGAAUCUGUAUAGCUUGC	AUUGUAGGACUGUACCGUAC	7.0612e+06	3.35783e+06	1.14549	0.557902
ULA2	1216	C4	GCLC	GCCAUGGGGCUGCUGUCCCA	GGAUCCCGUGCCGCCGCACG	ACUUGAGAACGUCCUUGUGC	7.88668e+06	3.87938e+06	1.2794	0.644556
ULA2	1216	D4	GEN1	GAAUGGGAGUGAAUGACUUG	GAGACUCAGAUCAACUGCAA	GCGUCAUGAAGCCCCACCUC	6.79288e+06	3.67487e+06	1.10196	0.610578
ULA2	1216	E4	GID4	CACCCUCCUCGGCUCCCGCG	UCCGGGGGACCCCGCGAUGC	UGCUGGGUGUUGAUGGGCGG	7.79546e+06	4.19458e+06	1.2646	0.696928
ULA2	1216	F4	GLMN	CCAUUGGAAGCUGAUCAAUA	UAAACAGUUAGCAGACUCAA	CCAUGAUUAAAAAUCAUUUU	6.55188e+06	3.27735e+06	1.06286	0.544531
ULA2	1216	G4	GLTSCR2	AGCGCUGGGUCCACCGAAGU	GCGGCUUGCUCAGGAGCCGC	CGGCUACAGGAGCGCACGAG	8501505	4.02742e+06	1.37914	0.669153
ULA2	1216	H4	GNL3L	UCCCCGCCCCAGAUUCAUGC	UGUCCCAGGGCCCAACUCAG	GGUCUGCCAGCUUCUGCACG	9688604	3354811	1.57171	0.5574
ULA2	1216	I4	GOLGA2	GAAGCCAGUAUGCCAGGGGA	UGUCUCCACGCAGCAGAAGA	UCCAGGAGAGUCUGAAGAUC	10264480	5.84136e+06	1.66513	0.970539
ULA2	1216	J4	GORASP1	CUGGCCGCCCCACAUGUUGC	UUGAACACCUCCAGCUUCAC	CAAGGAGAAUGACACCCUGA	6.82458e+06	3.9433e+06	1.1071	0.655178
ULA2	1216	K4	GPR75-ASB3	CUGAAAAGAAGCCUGGUGCA	CAACACGGAGCAAAUGUUAA	UGUAUUACAGCUGUUGAAAA	6.50601e+06	3.35537e+06	1.05542	0.557494
ULA2	1216	L4	GTPBP4	GUUGAGUCUUCGACAACGUG	AAUGUCUAAUGCGAUGUAUU	GAAUUUGUGAAAGUCUAUCA	9.50793e+06	4.00794e+06	1.5424	0.665917
ULA2	1216	M4	HACE1	UUACCGUCUUGUGACCGUUC	GUUGAUGUUGAGGAUGCCAU	UACAUUGGCUGGCUGUGAAU	7.43223e+06	3.81555e+06	1.20568	0.633952
ULA2	1216	N4	HAMP	UGGCACUGAGCUCCCAGAUC	UGGCUCUGUUUUCCCACAAC	UCGGGUGUCUCCAGUGCCCU	8336242	4.20804e+06	1.35233	0.699164
ULA2	1216	O4	HCFC1	GCUUUACCUGGAGUUCGUAG	ACUCGCCUCCUGGUGUUUGG	GUGAGGGGGGACAUUCCCCC	4206261	1.64584e+06	0.682351	0.273456
ULA2	1216	B5	HDAC6	CAACCAGGCAGCGAAGAAGU	GGGCCUCACCGAAGUGACAC	CAGAAGCGAAAUAUUAAAAA	7.90881e+06	3.19801e+06	1.28299	0.531348
ULA2	1216	C5	HDAC8	CGACUUCCCUUACCCGUUUG	UCGGGACUAUAGAUAUAAAC	UAAGCGGAAGAUGGAGGAGC	7.52175e+06	3578159	1.2202	0.594509
ULA2	1216	D5	HECTD1	UUAUCUCGAAUGGCUGCUGC	CAACACCACGACGGGUAAAU	UCACAUUGUUAGGUUUCAGA	7179997	3859435	1.16476	0.641243
ULA2	1216	E5	HECTD2	CGCCCGGCCCGACAUGAGUG	GCGGGCGCCGCCACCACCAG	CCCAUCGUAUCGGCGGGCGC	8.41867e+06	3.60131e+06	1.3657	0.598355
ULA2	1216	F5	HECTD3	GGUGAAGACUGCAUUCUUGC	CAUCAACCGCCGUCUUGCCA	GCCGCUGGCGGGACAGCAGU	6.54863e+06	3560008	1.06234	0.591494
ULA2	1216	G5	HECTD4	CCUUUCAUGCUGUUCUUCUA	UACCGCCUGAAUGCCUUGCG	UGCUAAUUCCGACGGGUUCU	6781617	3.68774e+06	1.10013	0.612717
ULA2	1216	H5	HECW1	GUUUUUAGGCCUGGCCGCCA	GCGGCUCCUUGCACCGGCGU	CGCCCCUGAGGUCCAUGUUG	6714689	3.45037e+06	1.08927	0.573278
ULA2	1216	I5	HECW2	CAGCGUGUACUCGUACAUGC	CACCAGGUCGGUGUCGCUGU	GGCGUCGAAAUCCCCAGAUG	6.82884e+06	3844136	1.10779	0.638701
ULA2	1216	J5	HERC1	UUUGAGGCAUAAAACUUGUU	UGCUGUUCUGUAUUCUAAAC	UUGAACACUUGAACAGCUCC	6838474	3.758e+06	1.10936	0.62439
ULA2	1216	K5	HERC2	ACCCCGUCACGACGGACCUG	CUCGUCAAAGAGCGAGGCCU	UGUGCGCCCAGGCGAGGAUG	8.94195e+06	4.81611e+06	1.45059	0.800195
ULA2	1216	L5	HERC3	AGAUAAGAACAAUGUUAUGU	AGCCACAAUUCCCUGCAGGU	AAACUUCCCCAUCUUCCAGC	9.3947e+06	3.77621e+06	1.52403	0.627416
ULA2	1216	M5	HERC4	CAGACAUACUGUGUUUGUUC	UAUAAAGAAGUCACUUUUUC	AUUACAAGCAUGUUGUGCUG	7.12303e+06	3.80465e+06	1.15552	0.63214
ULA2	1216	N5	HERC5	CAGAUUAUCUUUGAGGCAGG	AGAAAAUUUCUAAAGCUUCU	CAACAACUGGGAGAGCCUUG	6.50315e+06	3.32285e+06	1.05496	0.552089
ULA2	1216	O5	HERC6	GAAGCGGGAUGUACUUCUGU	CCCCGGGGCUGAGCUACUGC	AACCACAGGGUCCUCUCGUG	6.75068e+06	3335701	1.09511	0.554225
ULA2	1216	B6	HERPUD1	GGGUUCGGUCUCGGACUCCA	CGCCACUCAGCUCCAAGUCG	CGGGGUAGACGCGGCUCAGG	7.66372e+06	3.54873e+06	1.24323	0.58962
ULA2	1216	C6	HFE	CACACCCUGCAGGUCAUCCU	ACUGGAAGUACGGGUAUGAU	CCACCAAGCUGGAGUGGGAA	7.17062e+06	3.59698e+06	1.16324	0.597637
ULA2	1216	D6	HGS	UCCCUGCCUGCAGAGACAAG	AGGCCUGGGCGCAUGCCUUC	CACCUACCAGAUCAUGAAGG	7967629	3.8752e+06	1.29253	0.643863
ULA2	1216	E6	HIF1A	ACACAGGUAUUGCACUGCAC	UUCACAAAUCAGCACCAAGC	AGGAAAGUCUUGCUAUCUAA	6.64757e+06	3.66429e+06	1.07839	0.60882
ULA2	1216	F6	HIF3A	UCUCCUGGCUGCGCCGGCUG	CAGGUGGGCGCUGACGCCGC	GCUCACCUGCGGCGCAGAGG	8.01464e+06	4.21586e+06	1.30016	0.700463
ULA2	1216	G6	HIST1H2BA	GUGUGUGGUAGCUAUGCCGG	GUUAAGACCCAGAAAAAGGA	AGUGCUAAAGCAGGUCCAUC	6.94006e+06	3.61201e+06	1.12584	0.600134
ULA2	1216	H6	HIST1H2BB	GGGGCUGGAGCAGACUUAGA	GGGGCUGGAGCAGACUUAGA	GGGGCUGGAGCAGACUUAGA	6796810	3.70724e+06	1.1026	0.615956
ULA2	1216	I6	HIST1H2BC	UUACUCUGUGUACGUGUACA	CGCUUUGGUCACUGCCUUCU	CGCUUUGGUCACUGCCUUCU	9.03293e+06	4.52025e+06	1.46535	0.751037
ULA2	1216	J6	HIST1H2BD	GGAGCAGACUUGGUAGGUUC	CUAAGGCUCAGAAGAAGGAC	CUAUUCAGUGUAUGUGUACA	7239821	3.76801e+06	1.17446	0.626054
ULA2	1216	K6	HIST1H2BH	GGAGCGGACUUAGCUGGAUC	GGAGCGGACUUAGCUGGAUC	GGAGCGGACUUAGCUGGAUC	7328960	3.89463e+06	1.18892	0.64709
ULA2	1216	L6	HIST1H2BJ	UUUCGAGCGCAUCGCAGGUG	ACGAAAUGCCGGUGUCAGGG	ACGAAAUGCCGGUGUCAGGG	8.08464e+06	4.0292e+06	1.31151	0.66945
ULA2	1216	M6	HIST1H2BL	UUGUUUCAUUAUGCCCGAGC	UUGUUUCAUUAUGCCCGAGC	UUGUUUCAUUAUGCCCGAGC	7.21214e+06	3.75211e+06	1.16997	0.623411
ULA2	1216	N6	HIST1H2BM	AGAUUUGACUGGUUCAGGCA	CAUUAACAAGGCUCAGAAGA	CAUUAACAAGGCUCAGAAGA	6.7943e+06	3.66633e+06	1.10219	0.609159
ULA2	1216	O6	HIST1H2BN	UUUGAGGGCUCGGGCAUGAC	AGUGACAAAGGCCCAGAAGA	AGUGACAAAGGCCCAGAAGA	7.41349e+06	3.62255e+06	1.20264	0.601885
ULA2	1216	B7	HIST1H2BO	AGAUUUAGCCGGGUCGGGCA	CGUAACCAAGGCCCAGAAAA	UUACUCUAUCUACGUGUACA	8.11875e+06	3.57087e+06	1.31705	0.593299
ULA2	1216	C7	HLTF	AGUUUGAGAGGUCAUGUGGU	CAUCUGGAGGGAUAACAUCU	AAUUUCCAUGAACUCCAUAC	7266790	4.04978e+06	1.17884	0.672868
ULA2	1216	D7	HSP90AA1	CUAUACUUACUCAGAUAUUC	AGAUCAAAAGGAGCACGUCG	UUACAGCAUUUUUCAGUUGA	7001851	3.87511e+06	1.13586	0.643847
ULA2	1216	E7	HSP90AB1	CAUACUCACAUAAAGGGUGA	CUGGAGAAUCUCAUUGUCCC	UUUUGUUACUUAGUUGGAGA	7.07847e+06	3.9095e+06	1.14829	0.649561
ULA2	1216	F7	HSPA5	CGCACUUCUCACGCCAGGCC	ACCAGGAGUAGGUGGUCCCC	GCUGAGCAGCAGCAGCAUCG	6.47888e+06	3.20417e+06	1.05102	0.532371
ULA2	1216	G7	HSPBP1	UUGGAGGUUGCGUGGGGGCC	GGUUGCUCUUCAGGGGGCGG	AAACGGCCCAUGUCAGACGA	7535182	3.79913e+06	1.22238	0.631223
ULA2	1216	H7	HUWE1	GCAACUGAAAAUGCUUCUCU	AGACAGUGGAGAAUAUGUCA	GUGCGAGUUAUAUCACUGGG	6.4816e+06	4.81942e+06	1.05146	0.800745
ULA2	1216	I7	IFIH1	AAGGUCAGGUAGUCCAGCAC	UCAUCUCGUGCUUCAGGGCC	UGAGAAAGAAAGAUGUCGAA	6.51644e+06	3.66434e+06	1.05712	0.608829
ULA2	1216	J7	IKBKG	AUCUGCUGCCGGGCCACCAC	GCUGCACCUGCCUUCAGAAC	GAGGAGAAUCAAGAGCUCCG	6641930	3.52556e+06	1.07747	0.585771
ULA2	1216	K7	IL33	UUGUUUAGAAUCCCAACAGA	CUCUGGCCUUAUGAUAAAAA	UUUCAGUGAAGGCCUUUUGG	7.487e+06	3.95768e+06	1.21456	0.657566
ULA2	1216	L7	INO80	UCUUCAAUAGGAAUAUUUCU	UCUCCAAGUACUGAAGAUAG	AUCCCUGGCACCCAACUCCG	7.48845e+06	4.48227e+06	1.2148	0.744727
ULA2	1216	M7	INO80B	UCCUUCCACAGGAGAAGCCC	GUUUUUUCUUGUGCACUCCA	ACCAUCAGGAAGAAGACGCC	7.33778e+06	4.45781e+06	1.19035	0.740663
ULA2	1216	N7	INO80C	UACCUGCGCAAAGCUGGAAG	CCCGCCGCUGCUGCCAUUGU	GGCGGCGCAAAUUCCAAUUG	7.09975e+06	3.68598e+06	1.15174	0.612423
ULA2	1216	O7	INO80D	CAGAACGUGUCUGAUACAGA	UUGGGGCUAUAUGAGCACAA	AGAGUCACGUGAUGUAUGAA	6.3587e+06	3197165	1.03153	0.531207
ULA2	1216	B8	INO80E	UCAGAUAACAGCGAGACGGA	GCAUCUUCUUCUCACCUCUU	AGGAAGAGAAGCCCUCCGCU	7502708	3.39596e+06	1.21711	0.564236
ULA2	1216	C8	IPP	AGCUGCAAAGUAAGGACUGC	UGUGCAGCUGCAAGUUGGAC	GAUUUGGGCCAAGAUGAGUU	6831813	3.42274e+06	1.10827	0.568687
ULA2	1216	D8	IRAK1	CUGUGAUGAUGUCCCGCGCA	ACGGGCGUUGCGGUUGAUCC	CGCACAGCCGCAGCUCGGUC	6.83395e+06	3.60849e+06	1.10862	0.599549
ULA2	1216	E8	IRF2BP1	CGCAGCCACGUGCUCCCCGA	UCGCGGCUGCGUGAACUUCG	GCAUCUUGGGCAGGUCGCAC	7.63895e+06	4170163	1.23921	0.692871
ULA2	1216	F8	ISG15	CUGACGGUGAAGAUGCUGGC	CUUCAGCUCUGACACCGACA	CCCGAGCGGUGUGGCGCUGC	6872497	3.75547e+06	1.11488	0.623969
ULA2	1216	G8	ITCH	GUAGUUGUGACUUUGCAGCU	GACUUGUCAAUUUGUCUUGA	UGAACAUGUAGUUUCACCAU	6.52065e+06	3.71578e+06	1.0578	0.617376
ULA2	1216	H8	JADE2	UUCUAGGAUCCUCCCACCAC	CUCCCAGCCUGAUUGGCCAG	GUUGAUGAGCUCCAGCCAGU	7.31211e+06	3.97238e+06	1.18619	0.66001
ULA2	1216	I8	JOSD1	GGAGAAGGGUCCCCUACCUC	GUCCUGGAAGACGUUAUUGA	CAGCUCCAAUGAUUCAGAUU	7.58443e+06	4.11654e+06	1.23037	0.683961
ULA2	1216	J8	JOSD2	UCACCUCUUGCAGAUCUCAU	GCUCCAGGCGCUGCCGUUCG	GACGGCAUGUCCCAGGCCCC	8.8596e+06	4.46989e+06	1.43723	0.74267
ULA2	1216	K8	KAT2A	ACAAAUUGGUGCCCGAGAAG	CGGUGAAAAUGGACCGGAGA	GGGGGAGGCUAUCACAGCUC	7.60788e+06	3654846	1.23417	0.607251
ULA2	1216	L8	KAT2B	CGGGGCGGCAUGUCCGAGGC	CUUCCGCCCGCGCCCCCGCA	CACUGCCGUCGCCGGACCGC	7.43387e+06	3.78642e+06	1.20594	0.629112
ULA2	1216	M8	KBTBD11	GCCCUCGCUCUCGCUCUCCC	CGUCCCUGUGCUUCAGCUCC	ACCCGCGGGCCACCGCUGGA	7.52306e+06	3.97528e+06	1.22041	0.66049
ULA2	1216	N8	KBTBD12	GAUCAUGGAGUGCAAGAUUG	GAUGUGGUACUCACAGCAGA	AAUAAGGGCUAAAUGCAGCC	6.61075e+06	3.68646e+06	1.07241	0.612504
ULA2	1216	O8	KBTBD13	UUCCGAGGCCUCUUCCGCUC	CCGGCCGGCGCUGGCGGCGG	CGCCGGCGCCUGGAGGAAGG	8493781	4.78951e+06	1.37788	0.795775
ULA2	1216	B9	KBTBD2	UCUUUAGUCAUCCCAAGUCU	GAUAAGUCAGUGGUGGUUCA	AAGAACAGAAGACAAAUACU	7684239	3.28891e+06	1.24656	0.54645
ULA2	1216	C9	KBTBD3	GAUGCAAUUAAGUGUGUGCA	GUUAUCUGAGGAGACACUUC	CUAAACAUAACUUAGAAUCA	6.663e+06	3.38759e+06	1.08089	0.562847
ULA2	1216	D9	KBTBD4	UCACCAUUUCGGUGGAAGGC	UCAUGAUGCCUUGAGCCACA	AUGGAUGCUCCAGGCUCCUC	7.0135e+06	3.64323e+06	1.13775	0.605322
ULA2	1216	E9	KBTBD6	AGUUCUGAGCUAUAUAGGAC	CUCAAGUUUGCAGAUGCCUU	CAACGUGGAGCGCCUGUACG	6.38816e+06	3.54622e+06	1.0363	0.589203
ULA2	1216	F9	KBTBD7	GGCGUAGGACAGCCAGCAGC	CUUGAAGUUGUGAGCUAUGU	CGAAGGCGUCUGCAAACUUG	7097160	3.71242e+06	1.15132	0.616816
ULA2	1216	G9	KBTBD8	GCUUAAGAAUACUGCAAGCA	UUGUAGUGGAAGUGGAUCAC	CAUCAUCAUACCUGAAGUAA	7.61371e+06	3.51989e+06	1.23512	0.584827
ULA2	1216	H9	KCTD10	CAAGCAGGACACCAUGCUGA	CAGCUUCACGUAUUUGGAGC	GGUGAGCUCAGCGGUGCCAG	8.65929e+06	4441521	1.40473	0.737957
ULA2	1216	I9	KCTD11	CAUCCCGGUCGAUGAAGUAG	CUGGACCUGCCCCGUGGGUA	CUACCAGAUCCGGCCCCUCC	6.80751e+06	3.72882e+06	1.10433	0.619542
ULA2	1216	J9	KCTD13	CCAGCUGGCAGUCCUCAAUC	GAGAGAACUGGGGGAGCUGC	GUACAAUCCUCAAUUACCUG	7.35756e+06	3.80588e+06	1.19356	0.632344
ULA2	1216	K9	KCTD21	GGUCAAUGAAGCAGUUGCCC	AUGGCGCCUAGCAUGGAGUC	CCCCCCGACGUUCAGCGUGA	6853917	3.85957e+06	1.11186	0.641265
ULA2	1216	L9	KCTD6	CCACCUACAUUUAAUGUGAC	GCUUGGAGCUAUGUUUGGGG	AAUUACUUUAUUGAUCGAGA	7.55218e+06	3.96164e+06	1.22514	0.658224
ULA2	1216	M9	KCTD9	UUCACCGCUGCCCCGCCAGC	CCGUUACCUUUCCGUUCUUG	CCGUUACCUUUCCGUUCUUG	6.86488e+06	3.80669e+06	1.11364	0.632479
ULA2	1216	N9	KDM1A	CGGCGGCCCGAGAUGUUAUC	AGCGGCAGCAACCGGGACGG	CGACCUCGGCUGGGCCCGAC	6.78316e+06	3533942	1.10038	0.587163
ULA2	1216	O9	KDM1B	AGACCCCGGACGAUGAUGUG	AACACUGGAGUUCUCAGCGU	AGCUAUAAUCACCUACAUUG	6824192	3.56431e+06	1.10704	0.592208
ULA2	1216	B10	KDM2A	UAAAUUCCCCACUCGGCCAA	CUCCACGGUUAACACCUGUG	ACAUCGCACUCGUCUCCGUC	5.91059e+06	2.72933e+06	0.958832	0.453476
ULA2	1216	C10	KDM2B	AGAGUUCAGCCACACCAAGC	UCUCGUAGUAACGCACAAAC	CCAUCACGUCCACAAGCCGC	6.96724e+06	3.41718e+06	1.13024	0.567763
ULA2	1216	D10	KEAP1	CCGUGUAGGCGAAUUCAAUG	ACCAACGGGCUGCGGGAGCA	UGGGCCAUGAACUGGGCGGC	6595447	3.60911e+06	1.06993	0.599652
ULA2	1216	E10	KLHDC7A	GUCCUGGGCCUCUGCUCCUC	AGUCACCAGGAGCAGGGCAG	GGCCAUUCCCACCCCACCGC	9.36612e+06	4.37499e+06	1.5194	0.726902
ULA2	1216	F10	KLHDC7B	GGGGUGGCUUCUAAGAACCA	GGCUCCCGGGAACCGCCCUC	CACGGCCCCUCUUCUUCAGU	8.77641e+06	4.27744e+06	1.42373	0.710695
ULA2	1216	G10	KLHDC8A	CGUCCCCAUGGACUGCUUCG	CCAGCAGGGAGCAGUAGACC	CAUGGAGGUGCCUAACGUCA	7.41993e+06	3.79289e+06	1.20368	0.630187
ULA2	1216	H10	KLHDC8B	GUGAACACCAUGUCUGCAGG	GUGCCAUAGACCCGGCAAGU	AGUGUCUCAGCAGUGUCCAG	7133639	3.69862e+06	1.15724	0.614524
ULA2	1216	I10	KLHL1	UUUGAGCAGGCGACUCUGGC	GGGCCGCCGGUGGAAGGAGA	CGUAAAGCAUGUCAGGCUCU	6.81572e+06	3607193	1.10566	0.599333
ULA2	1216	J10	KLHL10	UGCCAUGGAGAUGGAGAGCG	GGAGAGGAAGAUGAGUGCGA	GCUCUGCGACGUGGUCAUCA	7064257	3.55539e+06	1.14598	0.590727
ULA2	1216	K10	KLHL11	CACUCGAAAUCCUCGGCUUC	CAGUCCUGCCGAGCCGGCGG	GGCCGCGGCUGCAUCUCUUC	6.62381e+06	3.67873e+06	1.07453	0.61122
ULA2	1216	L10	KLHL12	ACUUACCUCACUAGUGAACA	CCCUGCCCAUCGGAUUGUGC	UCAAUUCAAUGAACUCCCUC	7.03984e+06	3.66181e+06	1.14202	0.608408
ULA2	1216	M10	KLHL13	UUCCAGGCGAAGCCAACGAC	GCUAUUACUGGAAAGCACGA	UUUCCUGCAUUGCUGAGCAC	6687225	3.73789e+06	1.08482	0.621048
ULA2	1216	N10	KLHL14	CCAUUGCCACAAGGCCGUGC	CGUGCAGCAGGUUGUCGCUG	GCUCGCCAUGUCCAGAUCCG	6.67119e+06	3.60577e+06	1.08222	0.599098
ULA2	1216	O10	KLHL15	GUAUGUUCAACUUAUAGAAG	AGUACAUAAAUUGCAGGACA	AGACAUGAGGGAACGAGAUC	6.82085e+06	3.32729e+06	1.1065	0.552827
ULA2	1216	B11	KLHL17	AGGAAGUCGCGGCUCAGCAA	AUGAGGAGGUCCUUGCAGUC	CGCAGCGCCGGGGACGUGUG	7094618	3.24106e+06	1.15091	0.538501
ULA2	1216	C11	KLHL18	GCGGCCGGGGAAGAUGGUGG	UAGUCGCGGCUACGGCGUCA	CCCAGUCCGCGGUACCUUGA	1.03869e+07	4.95462e+06	1.68499	0.823208
ULA2	1216	D11	KLHL2	UAUUUGAAGCAGUAAUAGCA	CCCGACUGAUGGAACAUGUA	GCCAGUGACACAGUGCUGUG	6633712	3.57869e+06	1.07614	0.594597
ULA2	1216	E11	KLHL20	GCACCGGGAGCUAUGUGAUG	UACUUCCGAGCUAUGUUUAC	UAGCCCUCUCGUCAAUGUCU	7.12334e+06	3.81268e+06	1.15557	0.633475
ULA2	1216	F11	KLHL21	CGACUUCCCGGCGCACCGUG	AGCAGGCUCAGGGCGUGCGC	CGAAGGCGCCAUGGAGCGAC	6718570	3.67003e+06	1.0899	0.609774
ULA2	1216	G11	KLHL22	AAUCCUCUUCGAUGUUGUGC	UAGGUGUUGUUCACGCAGUG	UGUCAGGAUGGCAGAGGAGC	7498482	3.79293e+06	1.21642	0.630194
ULA2	1216	H11	KLHL23	AAUUAUAUACAUUGUGGCUG	UUUGACAAAUGUUUGGAUUC	GCCCCCAGUUACAUAAAUGU	6.58198e+06	3.5214e+06	1.06775	0.585079
ULA2	1216	I11	KLHL24	GUAACAAUGGUACUAAUAUU	AUGGACCCCAAAUCUCUGAC	CUGGAGUAUGUUUUCGGCAU	6.49505e+06	3.65473e+06	1.05364	0.607232
ULA2	1216	J11	KLHL25	ACCGACGUCACACUCUGGGC	CUCCCACCCGGACUGUGUGC	UCCGCGACUUGCGGGUCUCA	6957325	3.93778e+06	1.12864	0.654261
ULA2	1216	K11	KLHL26	GCAGCACGGCCGACAAGAAC	CCUGAGCGCGGAGGGUGGCC	GACGACCUUGUGUGCAGGAA	6.30993e+06	3.7107e+06	1.02361	0.616532
ULA2	1216	L11	KLHL28	UUUGAAAUACGGGCUGACGC	UGUGACAUCAUUCUUCGAGU	GUUAGCAAGCAUGUAGGUCG	6.59613e+06	3.71306e+06	1.07004	0.616923
ULA2	1216	M11	KLHL29	GAUUGCACACUCCUAUGGAG	CCCCAGCUCCCGCUGAUGCC	UUGACCACCACGCUGCUCAG	7.09712e+06	3.66622e+06	1.15131	0.60914
ULA2	1216	N11	KLHL3	AGGCAUUGGCCUGCUGCAGA	GUUGCAUCCCACCAAUUGCC	AGCUGCAGCAAGCUGGCUGC	6.59087e+06	3.61263e+06	1.06919	0.600237
ULA2	1216	O11	KLHL30	GGUGCGGAACGUGGAUGACC	GACGUCACACUGCUGGUGGG	AGUAGGGGCUGCUGAGCGCC	8671050	3.92105e+06	1.40664	0.65148
ULA2	1216	B12	KLHL31	AAAAAGACCCGUCAAUUCAG	UACCAAUGACUAAGUCACAU	UUCUUAUGGCCCCAACCUCU	6.70649e+06	3.34424e+06	1.08794	0.555644
ULA2	1216	C12	KLHL32	AUUCGGAGUGGCAGAGCCUC	CAAUCAGGGUGAUGUCGCAG	AGCAUGCAGUGACUAUUUCC	7.76456e+06	4.15018e+06	1.25959	0.68955
ULA2	1216	D12	KLHL33	CAACCCAGGGGCUUCCGCCA	GUACCAGAGCUCUUCCUGCU	UGCUUACUCCGGAGUUGUGC	8650930	4.20469e+06	1.40338	0.698607
ULA2	1216	E12	KLHL34	AGUGACCUGCAGGUAGCUGG	UGCCUGGCUGUCGCUUUCCA	GAUCCACCUGCACGUGCCAU	7812902	3.78051e+06	1.26743	0.628129
ULA2	1216	F12	KLHL35	GAGCCUCGAGCAGCAGCGGG	AAGCGGGCGCCAGUAGCGGC	CGCGGCGGGCCGGCGCGUCG	7.04745e+06	3.8743e+06	1.14326	0.643712
ULA2	1216	G12	KLHL36	CUGGGCCGACCACUCAAGCA	CGACGUCGCAGAAGAGCCCG	CACGGCCAGCAGGUUGCGAU	6.89838e+06	3.47283e+06	1.11907	0.577009
ULA2	1216	H12	KLHL38	GAUCAUACCCAGGCAGUUGC	GGGGAACUGUAGCAUGGAGG	CUCCUACGUGUAUACGGGGG	6.65417e+06	3.65944e+06	1.07946	0.608014
ULA2	1216	I12	KLHL4	CCUGCUACGAUGUCAGUGUC	UUUCAAGGUUCCACCAACAC	CUCUUCAACCUGCCCUGAAC	6.33858e+06	3.21563e+06	1.02826	0.534275
ULA2	1216	J12	KLHL40	UAGGCCACCCACCAUGGCGC	CAGCAGACGCUCCUGCAAGA	CUCGACUGUGUGGUGCGGGC	6.79649e+06	3.74433e+06	1.10255	0.622119
ULA2	1216	K12	KLHL41	CUCACAGAAUGGAUUCCCAG	UAGACCAUCCUGAAGAAGGG	ACUUUUGUCACCUGCUUUUA	7.01212e+06	3.85529e+06	1.13752	0.640555
ULA2	1216	L12	KLHL42	GGACAGGAGUCCCAGUCAUC	CCCGUCCAUGCUCAGGUACG	CAGGUCGGGAGGAAGGUUGU	9675452	4.83755e+06	1.56958	0.803757
ULA2	1216	M12	KLHL5	UUCUACAGUUGACAGCCAGC	CGGUAACCAAUUGAAGCCAA	GUGGAUGCCAUUGGCCAAGA	7.21296e+06	4.00223e+06	1.17011	0.664968
ULA2	1216	N12	KLHL7	UGAGGGAGGAUGGCAGCCUC	CCGAGCAGCAAGUUUCUUCU	CAUGAAUAACAUGCGGAAAC	7.22187e+06	3.75237e+06	1.17155	0.623454
ULA2	1216	O12	KLHL8	GAAGCUUGGAAAGAUUUUCA	UCCUCAAUUAGUGAUGGUGA	CUAGGAAUCACAUUACAAAG	6.6359e+06	3.39911e+06	1.07649	0.56476
ULA2	1216	B13	KLHL9	CAUCUCCAUCACCUGGUACC	CAGCAAUACUCACAGUUCGG	CGCCCAUUUCGCCGUUACCA	6329200	3.32681e+06	1.02674	0.552747
ULA2	1216	C13	KMT2C	UUCAUUCUCUAACCUGAUUU	GACACAGAUCGCUGAAGAGU	CAAAGAACAAUCUGCAGAAG	7.21327e+06	3.72444e+06	1.17016	0.618814
ULA2	1216	D13	KMT2D	CCAGGUUCUCCUAGGUGGGC	CAGGGGACACCACUGGACAC	GCCCAGUCUACACGGGCAGC	5.90562e+06	2.92323e+06	0.958026	0.485694
ULA2	1216	E13	LATS1	GGUGGAUUUCUGACUUGUCG	AUGGUUUAGAUAAAUUCCUA	UUACUGGCAGGAAAGGUCUU	7.73564e+06	4.05777e+06	1.2549	0.674196
ULA2	1216	F13	LCMT1	UUCCCUCUGCCUAGUGGCCA	GCAGACGACGAGGGCGUGCG	UGCCUGUCGGGCGCGGGGUU	7.07803e+06	4.0201e+06	1.14822	0.667937
ULA2	1216	G13	LEO1	CUGAGGGGUCAUUGUCCUCA	GAGGGAGCUUCACAUCAUAG	CAGGAUGAAAGAGGUGAUUC	6937023	4.06584e+06	1.12534	0.675537
ULA2	1216	H13	LIMK1	UGACGGGGGUCACCACAGUC	UGGGAUGGACACCAGGGUGA	UGACCCCCCGCACGGCCCAC	8.00723e+06	3.6868e+06	1.29895	0.61256
ULA2	1216	I13	LMO7	AAGAUGAUAUGUCGUAUCGA	UUGGGUAAAAAACGAUUGAA	AUGAGGAUAACAGAAGAAGU	6261881	3576610	1.01582	0.594252
ULA2	1216	J13	LNPEP	UCCUUCAUGAAUAGAAGCUC	GGUCUGUGCUUUUGUCAUCG	UCUUUGGUAAAGGUACAUCU	6.83898e+06	3.94515e+06	1.10944	0.655485
ULA2	1216	K13	LNX1	UGUGUCCACACGGAGUGUCC	AGGUCAUCAUCCACUUCCUC	GAUCGUUGGCAGACUCUGGC	7.06235e+06	3.88201e+06	1.14567	0.644995
ULA2	1216	L13	LNX2	UCUCUUGUAAAAAGUUUCUG	GAAGGCAAAUAUGGCAGACU	UUGAAUGUGGCCAACAGCAC	6.59146e+06	3.3309e+06	1.06928	0.553428
ULA2	1216	M13	LONRF1	GGCCGCGGAGUCGGAGCGCU	CGCAGGGCCGAGGCCGGUUC	GGUCCUCGCCACCGCCGGAG	7511131	3.76463e+06	1.21848	0.625491
ULA2	1216	N13	LONRF2	UGUCUCUUUAAGCCAGCGCU	ACACUUUGAAGAGGAUAAAA	UCUGAGAAAUCUGAUAUGCU	6813180	3.69014e+06	1.10525	0.613115
ULA2	1216	O13	LONRF3	CCUUGAUGGUGGCCACUGGG	ACGUUGACUCGCAGCGGCGG	AGCGUCGCAACUCCGGCACG	6.72855e+06	3.45329e+06	1.09152	0.573763
ULA2	1216	B14	LRR1	CGAGAUGAAGCUACACUGUG	CGGCUCGGACGCCCUUGCCC	CCCGCGCUUGUCCUUCAGGG	11639686	4.60189e+06	1.88822	0.764601
ULA2	1216	C14	LRRC41	CUUACGCCGGCUGGCCAUCA	GGGCUCACGUCGGCCCCGCC	UCACCAUGAGUGCUGGCUUC	6.79917e+06	3.16519e+06	1.10298	0.525895
ULA2	1216	D14	LRRK2	CAGCUGUCAGGGGUGCGAAG	AGGCUGAACAAUGUCCAGGA	GUGUUCACGUACUCCGAGCG	6903599	3601086	1.11992	0.598319
ULA2	1216	E14	LRSAM1	GUCUCUUACAGAGUCAGGGC	AAGAUGGAAUCGAGAACUCU	AAGGGAGGAGUUAGAGUGGC	7348483	3.6974e+06	1.19209	0.614322
ULA2	1216	F14	LTN1	UCUUUUGCUGCAAACGCAGC	CCCAUUAAACUUUUUAAGUA	GUGUGGCUUCUCGGACGCGA	6.61028e+06	3.41193e+06	1.07234	0.566891
ULA2	1216	G14	MAD1L1	UACUGCAUCUGCAGAGAACC	AUCUCUCAGCGUGUGGAGGG	GAAAGCAACCAUGGAAGACC	6.25974e+06	3.37238e+06	1.01547	0.560319
ULA2	1216	H14	MAD2L1	CUCCGUUCCCCCCGAUAUAU	GAUUUCGGCGCUCCCGCGCA	GAUUUCGGCGCUCCCGCGCA	6.46492e+06	3.12991e+06	1.04876	0.520033
ULA2	1216	I14	MAD2L2	UGAGCAUGGGGUGAGAUGGC	GCACUGCGUCAAGCCACUCC	UGUGCAGAUGUCCUGCCACC	9.68602e+06	4396963	1.57129	0.730553
ULA2	1216	J14	MAEA	GCGUUUGUUCAGCGUCUCGU	CACCAUGGUGGUGGCCGAGC	GGUCAGCCUGCUGGACGGCG	6.31111e+06	3.45263e+06	1.02381	0.573653
ULA2	1216	K14	MAGEC2	GUACAAAGUGGAAGAGGCGG	CCAGUCUUCUAACUCAACUG	GUCGUCAUGCCUCCCGUUCC	6.74035e+06	3651105	1.09344	0.606629
ULA2	1216	L14	MAGEL2	AUCAGGACCCCGGGAGUCGG	GCUGGGUCAUCGGAACCACC	UGCAGGCUUCAUUGGCCGCU	6.7899e+06	3.92006e+06	1.10147	0.651315
ULA2	1216	M14	MALT1	AGCUCUGAUGUAUUUCCAUU	UCACCUUUGAAUUCAGCCAG	UACUUACUCUGGAAGCUCUC	5908690	3.46153e+06	0.958524	0.575132
ULA2	1216	N14	MAP3K1	CCCGCGAGAGAAAAUGGCGG	GCUACGAGCCCUGAGGCAGG	UGCCGCGGGACUGCUGCGGG	7468830	4.1072e+06	1.21161	0.682408
ULA2	1216	O14	MAP3K7	UAACUUACUUUGGUGGUUUC	GUGAAGAUAAGCCACUCCUU	GCAGCAGUAUAAUAUGGCAA	6.13871e+06	3.59045e+06	0.995839	0.596551
ULA2	1216	B15	MAPK15	CCUUCCGGAUGACUGCGUUC	ACCGGGUGGCCCGCAGGAGC	GGCGGGGGAACCGCACCUUC	8382463	3.60819e+06	1.35983	0.599499
ULA2	1216	C15	MAPK9	UAUGAUUGACACAUUUUAAG	GAGUUUGGUUCUGAAAAGGA	CUGCAUUUGAUACAGUUCUU	6.37043e+06	3.46567e+06	1.03343	0.575819
ULA2	1216	D15	MARCHF1	CUGCAAGUAUGACUUCAUAA	ACCAGUCCUGCCUCCACCAG	CAGAAUCUGUCACUGCGAAG	7.69348e+06	4039463	1.24806	0.671155
ULA2	1216	E15	MARCHF10	CUCUGCUUUCCUUACAGUCA	UUGGUCAAUUGCUGGAAGUU	AGGAUGCUCUAACUGAACCA	6897625	3.65345e+06	1.11895	0.60702
ULA2	1216	F15	MARCHF11	UAGCGCGGGGCCGCGGGGAC	GGGAGGUUGCGGGGGAGGCU	CGGCACAACCAUGAGCUUUG	7.24561e+06	4.02414e+06	1.1754	0.668609
ULA2	1216	G15	MARCHF2	CUCCCGGUGGCCAUGACGAC	GGCUGCCGGAGCAGUCACAC	AAGUCACCUGUGCCACAUAC	6556560	3.35672e+06	1.06362	0.557717
ULA2	1216	H15	MARCHF3	UUCACAGUAGCUGGUGUUUG	GGACCUUGGGGACAAUUCAU	CACAUCGGCCGGUCAUUGAA	6.94368e+06	3.48664e+06	1.12642	0.579303
ULA2	1216	I15	MARCHF4	UGGCCGCCAAACCGGGGGGC	GCCGCAGUAAGAAAACCUUC	UGCUCCGGCUGGUACUGCUA	6.60499e+06	3427484	1.07148	0.569475
ULA2	1216	J15	MARCHF5	UUUUAAUUUACAGAAGUUGC	CUGAAUGGGUGAGACCAUGC	AGGAAACAGUACAGCCAGAG	7.12715e+06	3.59684e+06	1.15619	0.597613
ULA2	1216	K15	MARCHF6	UGAUUUUAGGCUCCAGCAGG	CCAGCUGAGAACGCAGUGGU	GGAAGAUGACGCUGGUGUGG	7.30984e+06	3896281	1.18582	0.647365
ULA2	1216	L15	MARCHF7	CGUCACCAUUUCAAUCUGCA	AAGAUCGCAGAACCAGCAAC	UGAGGUAGUACAGUUUGUAC	6.86628e+06	3.69051e+06	1.11387	0.613176
ULA2	1216	M15	MARCHF8	CUCCCACGUACUUUUCUCAG	GAGCUCGCAGCAGCGCGUGU	AAGCCUCCACUUCGUGCACC	7.09209e+06	3658920	1.1505	0.607928
ULA2	1216	N15	MARCHF9	GACCUUCUCGAUGACCGUCA	GCCAGGAGAUGCUGGCAACC	CUGCUCUUUCAGAUCUGCUA	7.33653e+06	4.01396e+06	1.19015	0.666918
ULA2	1216	O15	MASTL	GCAUUCCAACUCAUCAUUGU	GACGAAAGGUUUCAAUAAAA	AAGAGCGUCCAGUGGUGGGA	6.83625e+06	3.24768e+06	1.10899	0.539601
ULA2	1216	B16	MAVS	CCCACGGGAUGGUGUGAGGC	AGCCGCUUGCCUGGACCCAC	GCCCCUGCAGAGGCCAAGCC	6.79326e+06	2.99554e+06	1.10202	0.497708
ULA2	1216	C16	MBD5	UUGUUUGAAGUGCUGUUGGA	UGAUUCACUGGCAAAGAGAU	CUCCAGCCUUCAGCAGGAGA	6693141	3.78589e+06	1.08578	0.629024
ULA2	1216	D16	MBD6	CCCUUUGGCCCCGGUGACCC	CCGGCGGAAAGCUGUUGCUA	ACCAGGAGAAGAGUGUGAGC	7.68093e+06	4.19367e+06	1.24602	0.696776
ULA2	1216	E16	MCRS1	UAGGGAUGGUGCCCAAGGCC	CUCCUCAUCCUCUGAGCGGC	CUCUCUUGCUAGAUUCUCAG	5.81254e+06	3.01338e+06	0.942926	0.500672
ULA2	1216	F16	MDM2	GAAAAUUCAGAUGAAUUAUC	CAGAGCCAGGCUUUCAUCAA	UACAGGGACGCCAUCGAAUC	11138505	4.4357e+06	1.80692	0.736989
ULA2	1216	G16	MDM4	AUGCAGGUCAUGCACUAUUU	AUAUUGUGGUGGAGAUCUUU	UUUUUACCUUGGGUCUUUCA	7.75183e+06	3.95801e+06	1.25752	0.657621
ULA2	1216	H16	MED1	AAAAGAACUAUUCUGAAAGA	AAAUCUGAUCAGACACCAAG	CCAGAUGGCCGAAGUCUACA	8.18583e+06	3834719	1.32793	0.637137
ULA2	1216	I16	MED10	GCUUUUGGUUGAGCCCGGCC	UGUUCUCCACGAACUUCUCC	GGGACGGGCCGAGGCGAUGG	11274409	4.3668e+06	1.82896	0.725541
ULA2	1216	J16	MED11	UUUUUUCCUUGGACAAUUCU	CGCUUCAGUGCAACACGUGG	CAGACACACCGACCUGGGUG	9.69466e+06	4.95788e+06	1.57269	0.82375
ULA2	1216	K16	MED12	UGCAAUAAUGCUGCUGAAGU	AGUUAUCCUUCUGGUUCACU	GUCAGUGAACCAAGUGUUAA	9.28448e+06	4466787	1.50615	0.742154
ULA2	1216	L16	MED17	CAGCGGGGGCAGGUACGUCU	CUGGCUGAAGUCUAUCCGCU	GGGCGACGCGCAGGAGUGGC	9.53707e+06	4.39668e+06	1.54713	0.730507
ULA2	1216	M16	MED18	AACCACGAAGGCGGUGGAUG	UAAGGAGGAAUACCAUCUCA	CGACGCUCUAUGGACAGGGC	7.71377e+06	3.74491e+06	1.25135	0.622216
ULA2	1216	N16	MED20	CAAGGGUAGAGGCGGCCGUA	GCAUCUCCAAUUUCCGGGUA	GUCCCAGAUGCCUGUGGCCG	9.44598e+06	4.44076e+06	1.53235	0.737831
ULA2	1216	O16	MED21	AUUGGAGUAUUGCAGCAAUG	AAACCUGUUUACCUUCUGUA	CUCAAGAAAUCUAAUUUUAA	8.58851e+06	3.60159e+06	1.39325	0.598403
ULA2	1216	B17	MED24	GGCCGGCACUCCAGCCGCUG	CCACUGGCUGCUGCGCUGCA	UAGCUGUCACGGCAAAGCAG	1.00929e+07	4.00005e+06	1.6373	0.664607
ULA2	1216	C17	MED27	AUAAGUGGUCAAACAAGGUA	CUCUUUGCUUUUCAGUGAGC	CUCUUUGCUUUUCAGUGAGC	8963533	4.17546e+06	1.45409	0.693751
ULA2	1216	D17	MED30	GGCCAACGGAGGGGUGGACA	ACGGCGUCGCUGUGCCGCAU	GCUGGAAGAUCUCCAUGGUG	1.03654e+07	4.03493e+06	1.68151	0.670402
ULA2	1216	E17	MED31	AAUAAAGUAUACACAUGCUU	AUCUUAAAUACUUGCUUUAC	UUUUCAGUUCUUGCCCAAAG	8.40355e+06	4.40168e+06	1.36325	0.731337
ULA2	1216	F17	MED7	AUCCGCCCUUUGGAAAGUCA	AUCAUGUAACUGUCUUUUAU	UUGAUAUAUUGCAUUGGAGG	9349096	4924333	1.51664	0.818176
ULA2	1216	G17	MED8	ACGACAGAUGCUGCCCGCAU	GGCUUGGUUCUCAGAUGGUC	GUGUUACAGCGGCAGACUGA	7641610	3.34376e+06	1.23964	0.555564
ULA2	1216	H17	MEX3A	CUGACUUGUUGCGGGAGGCA	GUUCAUGGUGACAGGGCGAC	CUGCAAGAUUAAGGCCUUGA	6.86712e+06	3.53785e+06	1.114	0.587812
ULA2	1216	I17	MEX3B	CGUCACUGUCCAGCCCCAGC	CAGCGGAGGGGGAGAGACCC	CAGGUCUGCGAACAGCGAGC	9136076	4298842	1.48208	0.714251
ULA2	1216	J17	MEX3C	UGACGCUCUUUCUCCGGAGC	CCCCGGCGGUUGUGGGGCGG	UACGGAGGGGACGAUGCCCA	8205193	4034938	1.33107	0.670403
ULA2	1216	K17	MEX3D	AGCAAGGCCGGGGGUCUGCC	CGCCGACAGGAUCUCACGCU	CCGCACUGGGGUCUUGAUGU	6737533	3.92074e+06	1.09298	0.65143
ULA2	1216	L17	MGRN1	CGAUGCCGACAGCCCCACCG	CGGCGUCGAAGGUGAACUCC	GCAUCGGAGGAGUUCCUGAA	7.95129e+06	4.112e+06	1.28988	0.683207
ULA2	1216	M17	MIB1	AAUAACCGGGUGAUGGUGGA	GGACGGCGGCGAGGGCCAUG	GUGGUGGUAGUGUGGGACAA	8108715	3.7462e+06	1.31542	0.62243
ULA2	1216	N17	MIB2	AGCAGUCACAGAUGAUGUUG	GGUCGUAGUCCAGGCACACA	GCGAGUGAGCGGUCUCGUAG	6.84796e+06	3.75657e+06	1.11089	0.624152
ULA2	1216	O17	MID1	CGUCUAGACCUCGCUGGCUG	GAUGGACUCCACAGACUCGU	UAUUUGUCUGGAGCUCUUUG	6.50713e+06	3.45241e+06	1.0556	0.573616
ULA2	1216	B18	MID2	GAAAGCAGUAAUGGGUUCAA	GGGGCCUGGAUGGCCUCAAG	CUUUCCCGGCGGCUCUCACU	7654763	2.95875e+06	1.24178	0.491595
ULA2	1216	C18	MINDY1	GGCCCUCCCACCCUCACCUG	CAGGUCAAAGACACUGCACU	AAUGACAGUGCUGCCUAAAC	9429653	4.07796e+06	1.5297	0.677552
ULA2	1216	D18	MINDY2	GAAGAACCUGUCCCUGACGC	GUAUGGGCGGCGGAGACCAG	CCGGACUCGGCUUCUCCCGC	9471339	4707270	1.53647	0.782111
ULA2	1216	E18	MINDY3	CGUCACAGGCGGACUCUCGC	CCAGGGUACCUUGCGUCCAG	CAUCAGCUCUUUAGUCAGUU	6.6674e+06	3.59783e+06	1.0816	0.597777
ULA2	1216	F18	MKRN1	CCGCGCAACGUCCUACCUGC	GCCCGCCCCCAGGGACGGGG	AGGAGCGGCAGCGGCGACGG	9042920	4353387	1.46697	0.723313
ULA2	1216	G18	MKRN2	AUCUCUCUGGCAUGGCUGAA	UCAUCUCGGGGCUGGGCUGG	UGCUGGCCUCCACGUCAUCA	7.81061e+06	3.98012e+06	1.26706	0.661294
ULA2	1216	H18	MKRN3	AGCUCCCUCAGAAGCCCACG	GGCUCACAGACGGGAAGGUC	GCCACAUGCGGCAAGGGGCU	7.35338e+06	4233516	1.19288	0.703397
ULA2	1216	I18	MNAT1	AGGGCAACCCUGAUCGUCCA	CACAUUCACCAUCAGCUUCA	AGACGAGGCCUAGCAUCUCC	7.41126e+06	3.7978e+06	1.20227	0.631002
ULA2	1216	J18	MPHOSPH8	UUUCUGAGAAUAAUCGGAAA	CUUGGUUUUGUGAUCGUCUA	CAUUGCUGCAGAAGGUGAUC	6.66945e+06	3.43779e+06	1.08194	0.571187
ULA2	1216	K18	MPND	UGCGGGCGAGGAGGCGCCGG	GCUCCCGCAUUCGGCCGCUC	CGCCUGGUGAGCGCGCCCCC	1.02897e+07	4.71514e+06	1.66923	0.783418
ULA2	1216	L18	MSL2	CAAAGUAAAGGAUGAAUCUG	UGACUGUUCUUCUGAUAUUU	GUUUUUUGUAGCAGUUCACU	7022299	3.7884e+06	1.13918	0.62944
ULA2	1216	M18	MTA1	UCCUUCAGGGGAAAUAGAAG	GGUGCUUUAGUUUCUCGGGC	CUCUGCCCGCCACGCACAUC	6.38284e+06	3.43534e+06	1.03544	0.570781
ULA2	1216	N18	MTOR	GGUAAAAGUGUCCCCUGCCA	CAUGACAACUGGGUCAUUGG	UCCCACCUUCCACUCCUAUG	7627831	3.32571e+06	1.23741	0.552565
ULA2	1216	O18	MUL1	CCUUGAGCUCUUGGGAGACC	CCACAGAGGUGGUGCCCAGG	CUCGCCGCCGUCAUGGAGAG	7.47547e+06	3.59186e+06	1.21269	0.596786
ULA2	1216	B19	MYC	GCUGCACCGAGUCGUAGUCG	GCAGAGCGAGCUGCAGCCCC	CGGAGCGGCGGCUAGGGGAC	7971390	3.30745e+06	1.29314	0.54953
ULA2	1216	C19	MYCBP2	CACCCUGGGGACGCACCUGG	UGCGCUCAAUGACAGGGACC	GCAGCAGCUGGUAGUGACCC	6.98739e+06	3.15301e+06	1.13351	0.523872
ULA2	1216	D19	MYLIP	GUGUCGGCAAUGGAAAACUA	CUCAUUGGGGUUGGACCUGA	UCUUGGCUUACCUAUUAAUU	6.54633e+06	3.49544e+06	1.06196	0.580766
ULA2	1216	E19	MYSM1	ACUUAGAAAAGAGAGCUUCC	GUUUCAUGCAUUUUACUAUU	AGUAGACAUCACAGAUGAGG	6.9021e+06	3.30648e+06	1.11968	0.54937
ULA2	1216	F19	N4BP1	CUCUGAUUCUUUCUGACUAC	CACUUCCUCUGAUGCCAAGA	GUUUCUGAAAAGCUUGAUUC	6.4722e+06	3.49855e+06	1.04994	0.581282
ULA2	1216	G19	NAIP	UUCAAAAGGAACCCACAAUC	ACUUCACUGGGGUAAAAUCU	CUUAUGAGCCGUACAGCUCA	6.72988e+06	3.63034e+06	1.09174	0.603179
ULA2	1216	H19	NDFIP1	UGCAGCAUAUUUUGACUACA	ACUGCCCAGUUAUGAUGAAG	CAAAUUAUACUCACUCUCCC	6.33219e+06	3.5694e+06	1.02723	0.593054
ULA2	1216	I19	NDFIP2	CUCUUAGCUUCUUAAUGAAG	GGUGCUGGGUUUGAAGUAGG	ACCAUAUAGUAGUAUUACUG	7315929	3747399	1.18681	0.622629
ULA2	1216	J19	NEDD4	CAUCUUACUGAGCUCGAUGC	AAUUCUUCUGCAAGAUGAGU	GAAGGCCUGGUUGCUAUACA	7.832e+06	3.95665e+06	1.27053	0.657396
ULA2	1216	K19	NEDD4L	CUCGGCUUCUCAGCACCAAG	GUCCACUUUUUCUUCCCACC	GCUUGGUCUGUGCCACUGAG	6.54531e+06	3.67464e+06	1.0618	0.61054
ULA2	1216	L19	NEDD8	GCAGACAGCAUGAGAGCAAA	GCAUGCAUCACCUUGUCUGU	UGCCUGUUUCAGACGCUGAC	8610618	7.6764e+06	1.39684	1.27543
ULA2	1216	M19	NEURL1	UCACCAAGAAGCAGUGCUGC	CACUCUGGGACACCAGGUCG	UGCGAUGAUGUUGCCCUCAU	6.92127e+06	3.73755e+06	1.12279	0.620991
ULA2	1216	N19	NEURL1B	GCCACUCGCGCCGGGCCACA	GCCCAUCCGGCUGUACGAGC	UCCUGGGCGCUCAUGAGCGA	6.70332e+06	3.58443e+06	1.08743	0.595551
ULA2	1216	O19	NEURL2	GCGGCUGAAGCACACGCCGU	UGUUGGCACCGUGCACCCGA	GUGGAUUCGGGUGCACUCUG	6893143	3229571	1.11822	0.536592
ULA2	1216	B20	NEURL3	GUGUGGCGCUGCGAGUGCUG	AGGCGCACCACGUUCCACGA	GUGCGCCCUUGGCCUCGGCA	7.27269e+06	3.13842e+06	1.17979	0.521448
ULA2	1216	C20	NEUROD2	UUGGCCGCCCGGGCUGGCCC	GCGUCGCCCUUGUCGCUCCU	GGCCGGGCUCGCUGAACAGG	8076248	3.59151e+06	1.31015	0.596727
ULA2	1216	D20	NFE2L2	UAGUUGUAACUGAGCGAAAA	GCGACGGAAAGAGUAUGAGC	AUUUGAUUGACAUACUUUGG	7693987	2.74552e+06	1.24814	0.456166
ULA2	1216	E20	NFKBIA	CUCGUACUCCUCGUCUUUCA	UCCUUCUUCAGCCCGUCGCG	CGUCCGCGCCAUGUUCCAGG	7.73862e+06	3.83726e+06	1.25538	0.637559
ULA2	1216	F20	NFRKB	ACAUCCUCCAGAAGGUCCUC	CCUCCAUGAUGCGCGUGCCA	AUCUGUCAGCAUAUGGUCUA	6.63948e+06	3573343	1.07708	0.593709
ULA2	1216	G20	NGF	GGCGAUAGCUGCACGCGUGG	AAGUUUAGUCCAGUGGGCUU	AGCUUUUCUGAUCGGCAUAC	6.35425e+06	3389567	1.0308	0.563175
ULA2	1216	H20	NHLRC1	CUGCGGCCACGUGGUCUGCC	GAUCAGCCUGCUCGAGUGCA	CGCCAUGGCGGCCGAAGCCU	6.15671e+06	3.4813e+06	0.998757	0.578416
ULA2	1216	I20	NLRC3	UAGGACACCGGAUGCCCCGC	CCCAGCCAGCAGAUCCAUGA	GCAAGAGGUGCGGACGGGCA	6.7675e+06	3.40312e+06	1.09784	0.565427
ULA2	1216	J20	NLRC4	AUUCACAUGAUUUUGAAAAA	UCAGAACAUUCCAUACAAAU	CGAGCCCUUAUUCAAAGAAU	6.47711e+06	3.7003e+06	1.05073	0.614804
ULA2	1216	K20	NLRP3	GCUCAGAAUGCUCAUCAUCG	GAUGAUGUUGGACUGGGCGU	CAAGGCUCACCUCUCGACAG	6.97201e+06	3.72629e+06	1.13102	0.619121
ULA2	1216	L20	NMI	AAAAAUAUGACCAUGUUAUU	UGUCCUUUUUGUAUCUCAUA	GACAACUGGCUGUCAUUCUC	6780331	3629148	1.09992	0.602981
ULA2	1216	M20	NOD1	GCUGAAGAAUGACUACUUCU	GAAAAGCAAUCGGGAACUUC	ACUUUAACUAUGGAAGAGCA	6421522	3.36444e+06	1.04172	0.559001
ULA2	1216	N20	NOD2	GUGCUCGCAGGAGGCUUUUC	GACACUCUCGAAGCCUUCCA	CUACGAGGGCUUCCACCUCC	6.67696e+06	3.87228e+06	1.08315	0.643378
ULA2	1216	O20	NOSIP	CUCACGUGACAACAGGAUCG	CGAAGUCCUUCACGGCAUCC	AUCUCUGUCCCCAGCGGCCU	6.54547e+06	3.28865e+06	1.06182	0.546407
ULA2	1216	B21	NPEPPS	UAGGUGAAGAUUGUCCCCAG	AAUUUUUAGUUUGGCCUGGU	AAAUGUCAAACCAGACCAAU	7.56916e+06	3.20221e+06	1.22789	0.532046
ULA2	1216	C21	NPM1	AUUUACAGGUUGUGAACUAA	GUACCGUUCUUAAAGAUAAC	CCUUUUAGUUUCUAUUCAUG	6.87298e+06	3.266e+06	1.11495	0.542644
ULA2	1216	D21	NSD1	UGAACAUUCUGCAGAUGAGA	UGGAUUAUCAGAGCUCUUUC	GGAAAGAUUCCAGAGAACCU	7.30156e+06	3.64515e+06	1.18448	0.605639
ULA2	1216	E21	NSD2	UUGGCACUGCCGAGGAUUUC	CUCCAGUAGCCUGCAGGAGG	CAGCUUGUCGGCUGGAAUAA	7002229	3.66229e+06	1.13592	0.608488
ULA2	1216	F21	NSD3	GAUGGAUACCCAUUUGUGAG	UAUGAAGCUACUUUGCAGCA	UUGGCGGAGUCAAUGAGUUG	6.70704e+06	3.567e+06	1.08804	0.592655
ULA2	1216	G21	NSMCE1	GGAAACGGUACUCACGGUCA	GAUGACCCAUGGCGUGCUAG	CCCACAUGCAGGGCAGCACA	6.60912e+06	3.50861e+06	1.07215	0.582954
ULA2	1216	H21	NSMCE3	CCGGCCCGCGGGACGUGCUC	UGGAGCCAUAGCGGAAACCC	GAGACAUGUUGCAAAAACCG	7.08416e+06	3.82173e+06	1.14921	0.634979
ULA2	1216	I21	NUB1	GGGAAAACCCUUGAAGAACA	GAGGAAAAACUUCCAGUUAG	CAGUAUUUCUAGUCCUCUCU	7.16144e+06	3.48583e+06	1.16175	0.579169
ULA2	1216	J21	NXN	GCUGGCGCUGAGCUGCGCGC	ACCCAGCAGCGAGAUGCCGC	GGCCAGGAUGUCGGGCUUCC	6681187	3.60257e+06	1.08384	0.598566
ULA2	1216	K21	OGT	AUCUGCUCACUUUAGCACUC	GGAAUGUGUACAAGGAAAGA	AUAUAACCAUCGAUGAAAUC	8.80983e+06	4461042	1.42915	0.7412
ULA2	1216	L21	OS9	AGGGGAACGAAAGAUGGCGG	UUACCCGCAAGUCUGACCGG	UGCCCUCCCAUGACAGGCAA	8197024	4.03707e+06	1.32974	0.670758
ULA2	1216	M21	OTUB1	CCCUCCGUGGCUGCAGUUCA	GGCCAGCAGGUCGGCGACAG	GCAGCCGCAGGUAGACCACA	6.75499e+06	3.54179e+06	1.09581	0.588466
ULA2	1216	N21	OTUB2	CCCCUCAGGAACUCAGCAAA	GAACUGCUUCUACAGGGCCU	GGAGAUCUUCAAGUGAGUGC	6.41972e+06	3.39597e+06	1.04142	0.564239
ULA2	1216	O21	OTUD1	CCGGGGCCCCGGCGGGGUAG	CUGCAGCCCCCGGGAGCCGC	AGCGGCGGCUUCCCGGUGCU	7056397	3.20627e+06	1.14471	0.53272
ULA2	1216	B22	OTUD3	CGCCGCCUGCUUUCGGGACA	GUCCCGCUUGCGCUCGGCCU	CGGAAUCGGCCGGAGUCUGG	6407574	3.0141e+06	1.03945	0.500791
ULA2	1216	C22	OTUD4	AUUUAAAAUUAUAGCUUAUG	UGAAAAAUUCUUACCUUUUC	GAAAGAUUUUAUAAUUUAUC	8965615	3.83232e+06	1.45443	0.636739
ULA2	1216	D22	OTUD5	UGCGCCGACCUCCUCACGCU	GCGGCGACGUCAAGCUCCCG	UGUGGGUGGUGCCGUAGGCG	6.72072e+06	3.34457e+06	1.09025	0.555699
ULA2	1216	E22	OTUD6A	AUGCGCUGCUGUUCACUCUU	GAUCCGGAGCUUAAAAAACU	CCGGUGCUUCUGAGCCAUCU	6.49845e+06	3.24448e+06	1.0542	0.539068
ULA2	1216	F22	OTUD6B	GGCUUUUCAGCCAAAAUUCA	GGCCAAGUUGGAAAAAGAAA	GCUGACUACUAAGGAGAAUA	6.54826e+06	3223761	1.06228	0.535626
ULA2	1216	G22	OTUD7A	UCGUCCUGCCUCUGCAGGCA	CAUGUGUUCAAUGAAGGGCG	AGUCGCUCAGAGCGGCUGUC	6901045	3.83249e+06	1.11951	0.636767
ULA2	1216	H22	OTUD7B	CGAUGUCAUCCUGCCGCUGG	CCACUCCCCUCACUAAAGGA	CUGUUCAAAAUCACUGAGGG	8.03974e+06	3.70053e+06	1.30423	0.614841
ULA2	1216	I22	OTULIN	CGCGAGCGACCGCAUGAGUC	CGGCCACGGCGCGGGACGGC	CGCGGACUCACUGCUCGGCC	7.06087e+06	4.01151e+06	1.14543	0.666511
ULA2	1216	J22	PAF1	UUGGGGUCGAAGGGGAUAUC	UAAUGUUCCUAGGUCUGGAG	CCCACCGGACUCUGCCUGAG	10859268	4.54906e+06	1.76162	0.755824
ULA2	1216	K22	PAN2	CUUGGAGGCUCUUCCCGUCC	UAGCAGACUUGGGUUCAGGU	AUCGUCAUCAUGAACUUUGA	7.5385e+06	3.78316e+06	1.22292	0.62857
ULA2	1216	L22	PARK2	GAGGAAUGACUGGACUGUGC	UGCUAAGCGACAGGGGGUUC	CGACCUCCACUGGGAAACCA	7.27947e+06	3.60733e+06	1.1809	0.599356
ULA2	1216	M22	PARK7	UAGAUUAAGGUCACCGUUGC	CAGGACAAAUGACCACAUCA	CAUGGAGUUAUUCCUUCAUA	6.74594e+06	3.29129e+06	1.09434	0.546846
ULA2	1216	N22	PARP10	GUGUUGAGCUGGCAGAGACU	AGCAGCUCGUCGGGCACGGC	CCGUCCCAGGGUUGCAAUGG	7.89316e+06	3.78635e+06	1.28045	0.6291
ULA2	1216	O22	PARP11	CUAAAAACACACAACUAUUA	GUAAAAGAAAUGGAGCCACA	GAACACUGACUGUUGGUAUC	7.02572e+06	3.10916e+06	1.13973	0.516585
ULA2	1216	B23	SMARCA2				4.11953e+06	1.46249e+06	0.668281	0.242992
ULA2	1216	C23	SMARCA2				4.10485e+06	1.31517e+06	0.6659	0.218515
ULA2	1216	D23	CUL1	CCCUCACAAUGUCGUCAACC	AUCUGGGACGACCUCAGAGC	CGUGUAGAGCUCCAUAUAUC	7.04741e+06	5.837e+06	1.14325	0.969814
ULA2	1216	E23	CUL1	CCCUCACAAUGUCGUCAACC	AUCUGGGACGACCUCAGAGC	CGUGUAGAGCUCCAUAUAUC	7.21165e+06	5.65961e+06	1.16989	0.940341
ULA2	1216	F23	OR5M9	UAAGGCAAUGCCUAAUUUCA	AACCUGUAGCUCCUGACGAC	AUCACUCUGUUGGGAAAUAU	8.17473e+06	3.71597e+06	1.32613	0.617406
ULA2	1216	G23	OR5M9	UAAGGCAAUGCCUAAUUUCA	AACCUGUAGCUCCUGACGAC	AUCACUCUGUUGGGAAAUAU	8064906	3.31787e+06	1.30831	0.551263
ULA2	1216	H23	OR6N1	GAGCAAUGGACACAGGGAAC	AAUCUGGACACCCUGGAGAU	AGACCACCAGGAAUAUCAGC	7.47743e+06	3438532	1.21301	0.57131
ULA2	1216	I23	OR6N1	GAGCAAUGGACACAGGGAAC	AAUCUGGACACCCUGGAGAU	AGACCACCAGGAAUAUCAGC	7.61221e+06	3.58081e+06	1.23487	0.594949
ULA2	1216	J23	PLK1	GGCCCCGCACAUAGCGCCGC	CUCGGACGCGGACACCAAGG	UGCUGCUCAAGCCGCACCAG	7.84437e+06	1.91573e+06	1.27253	0.318297
ULA2	1216	K23	PLK1	GGCCCCGCACAUAGCGCCGC	CUCGGACGCGGACACCAAGG	UGCUGCUCAAGCCGCACCAG	7.16885e+06	2.00397e+06	1.16295	0.332959
ULA2	1216	L23	DMSO+RNAiMAX				6.22634e+06	5.99106e+06	1.01005	0.995412
ULA2	1216	M23	DMSO+RNAiMAX				6.10039e+06	6.00381e+06	0.989621	0.99753
ULA2	1216	N23	Cmpd 4+RNAiMAX				3.2035e+06	3.14141e+06	0.519681	0.521945
ULA2	1216	O23	Cmpd 4+RNAiMAX				2.91585e+06	2853203	0.473017	0.474058
ULA2	1217	B2	SMARCA2				4.01708e+06	1.70278e+06	0.634581	0.274944
ULA2	1217	C2	SMARCA2				4.35998e+06	1.73147e+06	0.688749	0.279577
ULA2	1217	D2	CUL1	CCCUCACAAUGUCGUCAACC	AUCUGGGACGACCUCAGAGC	CGUGUAGAGCUCCAUAUAUC	7.10451e+06	6.3255e+06	1.12231	1.02136
ULA2	1217	E2	CUL1	CCCUCACAAUGUCGUCAACC	AUCUGGGACGACCUCAGAGC	CGUGUAGAGCUCCAUAUAUC	7.25839e+06	5987996	1.14661	0.966868
ULA2	1217	F2	OR5M9	UAAGGCAAUGCCUAAUUUCA	AACCUGUAGCUCCUGACGAC	AUCACUCUGUUGGGAAAUAU	8900624	3.80855e+06	1.40604	0.614958
ULA2	1217	G2	OR5M9	UAAGGCAAUGCCUAAUUUCA	AACCUGUAGCUCCUGACGAC	AUCACUCUGUUGGGAAAUAU	7.86326e+06	3.60915e+06	1.24216	0.58276
ULA2	1217	H2	OR6N1	GAGCAAUGGACACAGGGAAC	AAUCUGGACACCCUGGAGAU	AGACCACCAGGAAUAUCAGC	8.45912e+06	3.65355e+06	1.33629	0.589931
ULA2	1217	I2	OR6N1	GAGCAAUGGACACAGGGAAC	AAUCUGGACACCCUGGAGAU	AGACCACCAGGAAUAUCAGC	8.04496e+06	3.40147e+06	1.27087	0.549228
ULA2	1217	J2	PLK1	GGCCCCGCACAUAGCGCCGC	CUCGGACGCGGACACCAAGG	UGCUGCUCAAGCCGCACCAG	7.91762e+06	2.00806e+06	1.25075	0.324237
ULA2	1217	K2	PLK1	GGCCCCGCACAUAGCGCCGC	CUCGGACGCGGACACCAAGG	UGCUGCUCAAGCCGCACCAG	7.68783e+06	2.07096e+06	1.21445	0.334393
ULA2	1217	L2	DMSO+RNAiMAX				6.19708e+06	6115555	0.978957	0.987465
ULA2	1217	M2	DMSO+RNAiMAX				6.33426e+06	6.03963e+06	1.00063	0.975205
ULA2	1217	N2	Cmpd 4+RNAiMAX				3.22146e+06	2.89122e+06	0.508896	0.466839
ULA2	1217	O2	Cmpd 4+RNAiMAX				3.193e+06	2.90271e+06	0.5044	0.468693
ULA2	1217	B3	FBXW9	GCGGGUGUGGAUAGCUGCGA	ACUGAGAACGCGGGCCACGU	GGAAUCAUCGCACCGCCCUA	7036261	3.02684e+06	1.11152	0.488737
ULA2	1217	C3	FEM1A	CUGCGCCGAGUCCGGCAGCC	CGUAGCCGUCACGUUCCAUG	CUCCCCCUGCGACCUGCUCC	7.21791e+06	3.16168e+06	1.14022	0.510509
ULA2	1217	D3	FEM1B	UGUAUACAAGGCGGCCAGCG	AGCGACAUCCGCUAUCUGCU	AGCCCGCAAUGGACACGCAA	7.30436e+06	3.47971e+06	1.15387	0.561861
ULA2	1217	E3	FEM1C	GGCGGCCAUCAAGAGUGGCG	GUUGGCAAGCAAAUCCAAAG	AGCAGUAUUUAACGCAGCUC	7.52063e+06	3.61701e+06	1.18804	0.584031
ULA2	1217	F3	FGFR3	UGCUGGCCGGGCUCUGGGCC	AGCUGUCCCCCGCCCGGGGG	GCCCUCGGAGCGUGUCCUGG	7.21017e+06	3.3634e+06	1.13899	0.54308
ULA2	1217	G3	FKBP1A	CACGCAGGUCUGGCCGCGCU	UGCUGAGCCGAUGCGCGCGG	CUCACCGUCUCCUGGGGAGA	7.95424e+06	3.45205e+06	1.25654	0.557394
ULA2	1217	H3	FOXK1	CGACGUGAACUGGAUCUUGA	GGGGUACAGUGGCCGCAGCG	CGGGGCUGACCAUGCUCCGG	5.90501e+06	2.83194e+06	0.932818	0.457267
ULA2	1217	I3	FOXK2	ACUCCUGCCCCUCCAGCCCC	GCCAUCUGACCUCAAUUUAA	UUCAGGUGGAGACAGCCCGA	9552602	3.45042e+06	1.50903	0.557132
ULA2	1217	J3	FOXO4	UCCAACUCCACGUAUGGAUC	GGGGUUCGAAGUCGGGAUCU	UGGUUAGCGAUCUCUGGUCG	6.91351e+06	3.02137e+06	1.09213	0.487853
ULA2	1217	K3	FYN	GCGUGGAAGUUGUUGUAGUU	CAUAGCGGUACCCAGAGCUC	AAUGGGCUGUGUGCAAUGUA	7240483	3.45364e+06	1.14378	0.557651
ULA2	1217	L3	FZR1	GAGGGCCACACGGCACGCGU	GGCCUCCAGGGGCGCUGGCC	UCUGCAGGAUCAUGCGGUCG	6.24624e+06	3.14392e+06	0.986722	0.507641
ULA2	1217	M3	G2E3	AAUGAUAACUUCGUUUACAU	ACGCAAAAUUGCCAGUAAAC	UAUUGUAGUAUUAUAUCAUU	7.18548e+06	3.32294e+06	1.13509	0.536547
ULA2	1217	N3	GAN	GCGGGCGCCGCGAUGGCUGA	CGCAGAAGCGAGACUCCUCG	GCAGAAGAACAUCCUGGCGG	6816830	3228187	1.07686	0.521248
ULA2	1217	O3	GATA3	AUCCAUGAAGCAGAGGCGGG	UCCAAGACGUCCAUCCACCA	AGGAGGAGGACGAGGCCGGG	9725226	4036383	1.5363	0.651746
ULA2	1217	B4	GBP6	UUGGCAGUUGCCAUGGAAUC	CAAGAAUCUGUAUAGCUUGC	AUUGUAGGACUGUACCGUAC	7.39846e+06	3185592	1.16874	0.51437
ULA2	1217	C4	GCLC	GCCAUGGGGCUGCUGUCCCA	GGAUCCCGUGCCGCCGCACG	ACUUGAGAACGUCCUUGUGC	8.47367e+06	3.88611e+06	1.33859	0.627482
ULA2	1217	D4	GEN1	GAAUGGGAGUGAAUGACUUG	GAGACUCAGAUCAACUGCAA	GCGUCAUGAAGCCCCACCUC	6.83042e+06	3265276	1.07901	0.527237
ULA2	1217	E4	GID4	CACCCUCCUCGGCUCCCGCG	UCCGGGGGACCCCGCGAUGC	UGCUGGGUGUUGAUGGGCGG	8.69182e+06	4.01815e+06	1.37305	0.648801
ULA2	1217	F4	GLMN	CCAUUGGAAGCUGAUCAAUA	UAAACAGUUAGCAGACUCAA	CCAUGAUUAAAAAUCAUUUU	7.37025e+06	3.1837e+06	1.16428	0.514065
ULA2	1217	G4	GLTSCR2	AGCGCUGGGUCCACCGAAGU	GCGGCUUGCUCAGGAGCCGC	CGGCUACAGGAGCGCACGAG	8554808	3525005	1.35141	0.569175
ULA2	1217	H4	GNL3L	UCCCCGCCCCAGAUUCAUGC	UGUCCCAGGGCCCAACUCAG	GGUCUGCCAGCUUCUGCACG	8.99786e+06	2.81315e+06	1.4214	0.454233
ULA2	1217	I4	GOLGA2	GAAGCCAGUAUGCCAGGGGA	UGUCUCCACGCAGCAGAAGA	UCCAGGAGAGUCUGAAGAUC	10611701	6002401	1.67634	0.969194
ULA2	1217	J4	GORASP1	CUGGCCGCCCCACAUGUUGC	UUGAACACCUCCAGCUUCAC	CAAGGAGAAUGACACCCUGA	7261021	3.53328e+06	1.14703	0.570511
ULA2	1217	K4	GPR75-ASB3	CUGAAAAGAAGCCUGGUGCA	CAACACGGAGCAAAUGUUAA	UGUAUUACAGCUGUUGAAAA	6.76103e+06	3.34876e+06	1.06804	0.540717
ULA2	1217	L4	GTPBP4	GUUGAGUCUUCGACAACGUG	AAUGUCUAAUGCGAUGUAUU	GAAUUUGUGAAAGUCUAUCA	9.55965e+06	3.23721e+06	1.51015	0.522704
ULA2	1217	M4	HACE1	UUACCGUCUUGUGACCGUUC	GUUGAUGUUGAGGAUGCCAU	UACAUUGGCUGGCUGUGAAU	7.81558e+06	3808307	1.23463	0.614919
ULA2	1217	N4	HAMP	UGGCACUGAGCUCCCAGAUC	UGGCUCUGUUUUCCCACAAC	UCGGGUGUCUCCAGUGCCCU	8.88041e+06	4.17976e+06	1.40284	0.674896
ULA2	1217	O4	HCFC1	GCUUUACCUGGAGUUCGUAG	ACUCGCCUCCUGGUGUUUGG	GUGAGGGGGGACAUUCCCCC	4182310	1.42498e+06	0.660682	0.230087
ULA2	1217	B5	HDAC6	CAACCAGGCAGCGAAGAAGU	GGGCCUCACCGAAGUGACAC	CAGAAGCGAAAUAUUAAAAA	7.42129e+06	3.35813e+06	1.17235	0.542229
ULA2	1217	C5	HDAC8	CGACUUCCCUUACCCGUUUG	UCGGGACUAUAGAUAUAAAC	UAAGCGGAAGAUGGAGGAGC	7976437	3.56658e+06	1.26004	0.575887
ULA2	1217	D5	HECTD1	UUAUCUCGAAUGGCUGCUGC	CAACACCACGACGGGUAAAU	UCACAUUGUUAGGUUUCAGA	7738084	3556878	1.22239	0.574321
ULA2	1217	E5	HECTD2	CGCCCGGCCCGACAUGAGUG	GCGGGCGCCGCCACCACCAG	CCCAUCGUAUCGGCGGGCGC	7.25704e+06	3.91472e+06	1.1464	0.632101
ULA2	1217	F5	HECTD3	GGUGAAGACUGCAUUCUUGC	CAUCAACCGCCGUCUUGCCA	GCCGCUGGCGGGACAGCAGU	7.17965e+06	3.17628e+06	1.13417	0.512867
ULA2	1217	G5	HECTD4	CCUUUCAUGCUGUUCUUCUA	UACCGCCUGAAUGCCUUGCG	UGCUAAUUCCGACGGGUUCU	6.91475e+06	3.45377e+06	1.09233	0.557673
ULA2	1217	H5	HECW1	GUUUUUAGGCCUGGCCGCCA	GCGGCUCCUUGCACCGGCGU	CGCCCCUGAGGUCCAUGUUG	6.81905e+06	3.21139e+06	1.07721	0.518535
ULA2	1217	I5	HECW2	CAGCGUGUACUCGUACAUGC	CACCAGGUCGGUGUCGCUGU	GGCGUCGAAAUCCCCAGAUG	7.05511e+06	3.57724e+06	1.1145	0.577609
ULA2	1217	J5	HERC1	UUUGAGGCAUAAAACUUGUU	UGCUGUUCUGUAUUCUAAAC	UUGAACACUUGAACAGCUCC	7.11062e+06	3.90828e+06	1.12327	0.631061
ULA2	1217	K5	HERC2	ACCCCGUCACGACGGACCUG	CUCGUCAAAGAGCGAGGCCU	UGUGCGCCCAGGCGAGGAUG	8.98747e+06	4.51193e+06	1.41976	0.72853
ULA2	1217	L5	HERC3	AGAUAAGAACAAUGUUAUGU	AGCCACAAUUCCCUGCAGGU	AAACUUCCCCAUCUUCCAGC	8.41078e+06	4.03802e+06	1.32866	0.65201
ULA2	1217	M5	HERC4	CAGACAUACUGUGUUUGUUC	UAUAAAGAAGUCACUUUUUC	AUUACAAGCAUGUUGUGCUG	7.11014e+06	3.4764e+06	1.12319	0.561326
ULA2	1217	N5	HERC5	CAGAUUAUCUUUGAGGCAGG	AGAAAAUUUCUAAAGCUUCU	CAACAACUGGGAGAGCCUUG	6.52423e+06	3.33294e+06	1.03064	0.538162
ULA2	1217	O5	HERC6	GAAGCGGGAUGUACUUCUGU	CCCCGGGGCUGAGCUACUGC	AACCACAGGGUCCUCUCGUG	7221667	3.47458e+06	1.14081	0.561033
ULA2	1217	B6	HERPUD1	GGGUUCGGUCUCGGACUCCA	CGCCACUCAGCUCCAAGUCG	CGGGGUAGACGCGGCUCAGG	8.13752e+06	3.51063e+06	1.28549	0.566853
ULA2	1217	C6	HFE	CACACCCUGCAGGUCAUCCU	ACUGGAAGUACGGGUAUGAU	CCACCAAGCUGGAGUGGGAA	7.73511e+06	3.44791e+06	1.22192	0.556727
ULA2	1217	D6	HGS	UCCCUGCCUGCAGAGACAAG	AGGCCUGGGCGCAUGCCUUC	CACCUACCAGAUCAUGAAGG	8.4099e+06	3.56075e+06	1.32852	0.574945
ULA2	1217	E6	HIF1A	ACACAGGUAUUGCACUGCAC	UUCACAAAUCAGCACCAAGC	AGGAAAGUCUUGCUAUCUAA	7.03448e+06	3648811	1.11124	0.589165
ULA2	1217	F6	HIF3A	UCUCCUGGCUGCGCCGGCUG	CAGGUGGGCGCUGACGCCGC	GCUCACCUGCGGCGCAGAGG	8.1223e+06	3.93432e+06	1.28309	0.635265
ULA2	1217	G6	HIST1H2BA	GUGUGUGGUAGCUAUGCCGG	GUUAAGACCCAGAAAAAGGA	AGUGCUAAAGCAGGUCCAUC	7.24698e+06	3543843	1.14481	0.572216
ULA2	1217	H6	HIST1H2BB	GGGGCUGGAGCAGACUUAGA	GGGGCUGGAGCAGACUUAGA	GGGGCUGGAGCAGACUUAGA	7708764	3881861	1.21776	0.626795
ULA2	1217	I6	HIST1H2BC	UUACUCUGUGUACGUGUACA	CGCUUUGGUCACUGCCUUCU	CGCUUUGGUCACUGCCUUCU	9790816	4561975	1.54666	0.736612
ULA2	1217	J6	HIST1H2BD	GGAGCAGACUUGGUAGGUUC	CUAAGGCUCAGAAGAAGGAC	CUAUUCAGUGUAUGUGUACA	8.12444e+06	3.83783e+06	1.28342	0.619686
ULA2	1217	K6	HIST1H2BH	GGAGCGGACUUAGCUGGAUC	GGAGCGGACUUAGCUGGAUC	GGAGCGGACUUAGCUGGAUC	7.27443e+06	4.13043e+06	1.14915	0.666931
ULA2	1217	L6	HIST1H2BJ	UUUCGAGCGCAUCGCAGGUG	ACGAAAUGCCGGUGUCAGGG	ACGAAAUGCCGGUGUCAGGG	8469523	4.12348e+06	1.33794	0.665809
ULA2	1217	M6	HIST1H2BL	UUGUUUCAUUAUGCCCGAGC	UUGUUUCAUUAUGCCCGAGC	UUGUUUCAUUAUGCCCGAGC	7.19889e+06	3.55495e+06	1.13721	0.574009
ULA2	1217	N6	HIST1H2BM	AGAUUUGACUGGUUCAGGCA	CAUUAACAAGGCUCAGAAGA	CAUUAACAAGGCUCAGAAGA	7.03243e+06	3.20312e+06	1.11092	0.5172
ULA2	1217	O6	HIST1H2BN	UUUGAGGGCUCGGGCAUGAC	AGUGACAAAGGCCCAGAAGA	AGUGACAAAGGCCCAGAAGA	8466353	3.70891e+06	1.33744	0.59887
ULA2	1217	B7	HIST1H2BO	AGAUUUAGCCGGGUCGGGCA	CGUAACCAAGGCCCAGAAAA	UUACUCUAUCUACGUGUACA	8.38672e+06	3.7392e+06	1.32486	0.60376
ULA2	1217	C7	HLTF	AGUUUGAGAGGUCAUGUGGU	CAUCUGGAGGGAUAACAUCU	AAUUUCCAUGAACUCCAUAC	7.81332e+06	3.58008e+06	1.23428	0.578067
ULA2	1217	D7	HSP90AA1	CUAUACUUACUCAGAUAUUC	AGAUCAAAAGGAGCACGUCG	UUACAGCAUUUUUCAGUUGA	7.44932e+06	3.62226e+06	1.17677	0.584879
ULA2	1217	E7	HSP90AB1	CAUACUCACAUAAAGGGUGA	CUGGAGAAUCUCAUUGUCCC	UUUUGUUACUUAGUUGGAGA	7.2417e+06	3.76267e+06	1.14398	0.60755
ULA2	1217	F7	HSPA5	CGCACUUCUCACGCCAGGCC	ACCAGGAGUAGGUGGUCCCC	GCUGAGCAGCAGCAGCAUCG	7.06246e+06	2549980	1.11566	0.411739
ULA2	1217	G7	HSPBP1	UUGGAGGUUGCGUGGGGGCC	GGUUGCUCUUCAGGGGGCGG	AAACGGCCCAUGUCAGACGA	8.22433e+06	4.28194e+06	1.2992	0.691395
ULA2	1217	H7	HUWE1	GCAACUGAAAAUGCUUCUCU	AGACAGUGGAGAAUAUGUCA	GUGCGAGUUAUAUCACUGGG	7.45449e+06	4.60275e+06	1.17759	0.743195
ULA2	1217	I7	IFIH1	AAGGUCAGGUAGUCCAGCAC	UCAUCUCGUGCUUCAGGGCC	UGAGAAAGAAAGAUGUCGAA	6.71527e+06	3.59032e+06	1.06082	0.579721
ULA2	1217	J7	IKBKG	AUCUGCUGCCGGGCCACCAC	GCUGCACCUGCCUUCAGAAC	GAGGAGAAUCAAGAGCUCCG	7162160	3.38215e+06	1.13141	0.546109
ULA2	1217	K7	IL33	UUGUUUAGAAUCCCAACAGA	CUCUGGCCUUAUGAUAAAAA	UUUCAGUGAAGGCCUUUUGG	7.69509e+06	4.10447e+06	1.2156	0.66274
ULA2	1217	L7	INO80	UCUUCAAUAGGAAUAUUUCU	UCUCCAAGUACUGAAGAUAG	AUCCCUGGCACCCAACUCCG	7.56004e+06	4.24938e+06	1.19426	0.686138
ULA2	1217	M7	INO80B	UCCUUCCACAGGAGAAGCCC	GUUUUUUCUUGUGCACUCCA	ACCAUCAGGAAGAAGACGCC	7.5242e+06	4183240	1.1886	0.675458
ULA2	1217	N7	INO80C	UACCUGCGCAAAGCUGGAAG	CCCGCCGCUGCUGCCAUUGU	GGCGGCGCAAAUUCCAAUUG	7.20929e+06	3.3896e+06	1.13886	0.54731
ULA2	1217	O7	INO80D	CAGAACGUGUCUGAUACAGA	UUGGGGCUAUAUGAGCACAA	AGAGUCACGUGAUGUAUGAA	6563462	3.08355e+06	1.03683	0.497893
ULA2	1217	B8	INO80E	UCAGAUAACAGCGAGACGGA	GCAUCUUCUUCUCACCUCUU	AGGAAGAGAAGCCCUCCGCU	7.57814e+06	3.59797e+06	1.19712	0.580956
ULA2	1217	C8	IPP	AGCUGCAAAGUAAGGACUGC	UGUGCAGCUGCAAGUUGGAC	GAUUUGGGCCAAGAUGAGUU	7.81247e+06	3390496	1.23414	0.547456
ULA2	1217	D8	IRAK1	CUGUGAUGAUGUCCCGCGCA	ACGGGCGUUGCGGUUGAUCC	CGCACAGCCGCAGCUCGGUC	7177967	3.51036e+06	1.13391	0.56681
ULA2	1217	E8	IRF2BP1	CGCAGCCACGUGCUCCCCGA	UCGCGGCUGCGUGAACUUCG	GCAUCUUGGGCAGGUCGCAC	8.2498e+06	4.04219e+06	1.30323	0.652683
ULA2	1217	F8	ISG15	CUGACGGUGAAGAUGCUGGC	CUUCAGCUCUGACACCGACA	CCCGAGCGGUGUGGCGCUGC	7.10857e+06	3.82484e+06	1.12295	0.617588
ULA2	1217	G8	ITCH	GUAGUUGUGACUUUGCAGCU	GACUUGUCAAUUUGUCUUGA	UGAACAUGUAGUUUCACCAU	6515310	3.45412e+06	1.02923	0.557728
ULA2	1217	H8	JADE2	UUCUAGGAUCCUCCCACCAC	CUCCCAGCCUGAUUGGCCAG	GUUGAUGAGCUCCAGCCAGU	8.78158e+06	3.98903e+06	1.38723	0.644099
ULA2	1217	I8	JOSD1	GGAGAAGGGUCCCCUACCUC	GUCCUGGAAGACGUUAUUGA	CAGCUCCAAUGAUUCAGAUU	8300641	3.83631e+06	1.31126	0.61944
ULA2	1217	J8	JOSD2	UCACCUCUUGCAGAUCUCAU	GCUCCAGGCGCUGCCGUUCG	GACGGCAUGUCCCAGGCCCC	9329829	4222875	1.47384	0.681858
ULA2	1217	K8	KAT2A	ACAAAUUGGUGCCCGAGAAG	CGGUGAAAAUGGACCGGAGA	GGGGGAGGCUAUCACAGCUC	8.80583e+06	3.79128e+06	1.39106	0.612169
ULA2	1217	L8	KAT2B	CGGGGCGGCAUGUCCGAGGC	CUUCCGCCCGCGCCCCCGCA	CACUGCCGUCGCCGGACCGC	7.90508e+06	3.44591e+06	1.24877	0.556404
ULA2	1217	M8	KBTBD11	GCCCUCGCUCUCGCUCUCCC	CGUCCCUGUGCUUCAGCUCC	ACCCGCGGGCCACCGCUGGA	7.99496e+06	3.77566e+06	1.26297	0.609647
ULA2	1217	N8	KBTBD12	GAUCAUGGAGUGCAAGAUUG	GAUGUGGUACUCACAGCAGA	AAUAAGGGCUAAAUGCAGCC	7017653	3.44178e+06	1.10858	0.555737
ULA2	1217	O8	KBTBD13	UUCCGAGGCCUCUUCCGCUC	CCGGCCGGCGCUGGCGGCGG	CGCCGGCGCCUGGAGGAAGG	10122435	4664799	1.59905	0.753214
ULA2	1217	B9	KBTBD2	UCUUUAGUCAUCCCAAGUCU	GAUAAGUCAGUGGUGGUUCA	AAGAACAGAAGACAAAUACU	7841470	3438202	1.23872	0.555159
ULA2	1217	C9	KBTBD3	GAUGCAAUUAAGUGUGUGCA	GUUAUCUGAGGAGACACUUC	CUAAACAUAACUUAGAAUCA	6901892	3496206	1.0903	0.564524
ULA2	1217	D9	KBTBD4	UCACCAUUUCGGUGGAAGGC	UCAUGAUGCCUUGAGCCACA	AUGGAUGCUCCAGGCUCCUC	8.00487e+06	3.85097e+06	1.26453	0.621807
ULA2	1217	E9	KBTBD6	AGUUCUGAGCUAUAUAGGAC	CUCAAGUUUGCAGAUGCCUU	CAACGUGGAGCGCCUGUACG	6.64673e+06	3.51217e+06	1.04999	0.567102
ULA2	1217	F9	KBTBD7	GGCGUAGGACAGCCAGCAGC	CUUGAAGUUGUGAGCUAUGU	CGAAGGCGUCUGCAAACUUG	7.51402e+06	3.60374e+06	1.18699	0.581888
ULA2	1217	G9	KBTBD8	GCUUAAGAAUACUGCAAGCA	UUGUAGUGGAAGUGGAUCAC	CAUCAUCAUACCUGAAGUAA	6.80317e+06	3376143	1.0747	0.545138
ULA2	1217	H9	KCTD10	CAAGCAGGACACCAUGCUGA	CAGCUUCACGUAUUUGGAGC	GGUGAGCUCAGCGGUGCCAG	9.95771e+06	4.35279e+06	1.57303	0.702835
ULA2	1217	I9	KCTD11	CAUCCCGGUCGAUGAAGUAG	CUGGACCUGCCCCGUGGGUA	CUACCAGAUCCGGCCCCUCC	6.77202e+06	3.57985e+06	1.06978	0.57803
ULA2	1217	J9	KCTD13	CCAGCUGGCAGUCCUCAAUC	GAGAGAACUGGGGGAGCUGC	GUACAAUCCUCAAUUACCUG	7937303	3780279	1.25386	0.610393
ULA2	1217	K9	KCTD21	GGUCAAUGAAGCAGUUGCCC	AUGGCGCCUAGCAUGGAGUC	CCCCCCGACGUUCAGCGUGA	7.23897e+06	3717028	1.14355	0.60018
ULA2	1217	L9	KCTD6	CCACCUACAUUUAAUGUGAC	GCUUGGAGCUAUGUUUGGGG	AAUUACUUUAUUGAUCGAGA	7963711	3.71786e+06	1.25803	0.600315
ULA2	1217	M9	KCTD9	UUCACCGCUGCCCCGCCAGC	CCGUUACCUUUCCGUUCUUG	CCGUUACCUUUCCGUUCUUG	7.33911e+06	3.86527e+06	1.15936	0.624116
ULA2	1217	N9	KDM1A	CGGCGGCCCGAGAUGUUAUC	AGCGGCAGCAACCGGGACGG	CGACCUCGGCUGGGCCCGAC	6.95655e+06	3.63324e+06	1.09893	0.586652
ULA2	1217	O9	KDM1B	AGACCCCGGACGAUGAUGUG	AACACUGGAGUUCUCAGCGU	AGCUAUAAUCACCUACAUUG	7218134	3.40532e+06	1.14025	0.54985
ULA2	1217	B10	KDM2A	UAAAUUCCCCACUCGGCCAA	CUCCACGGUUAACACCUGUG	ACAUCGCACUCGUCUCCGUC	6513017	2.90334e+06	1.02887	0.468795
ULA2	1217	C10	KDM2B	AGAGUUCAGCCACACCAAGC	UCUCGUAGUAACGCACAAAC	CCAUCACGUCCACAAGCCGC	7.15475e+06	3.82852e+06	1.13024	0.618183
ULA2	1217	D10	KEAP1	CCGUGUAGGCGAAUUCAAUG	ACCAACGGGCUGCGGGAGCA	UGGGCCAUGAACUGGGCGGC	6.8021e+06	3472548	1.07453	0.560704
ULA2	1217	E10	KLHDC7A	GUCCUGGGCCUCUGCUCCUC	AGUCACCAGGAGCAGGGCAG	GGCCAUUCCCACCCCACCGC	10263231	4.42995e+06	1.62129	0.715294
ULA2	1217	F10	KLHDC7B	GGGGUGGCUUCUAAGAACCA	GGCUCCCGGGAACCGCCCUC	CACGGCCCCUCUUCUUCAGU	9.60172e+06	4.48442e+06	1.51679	0.724088
ULA2	1217	G10	KLHDC8A	CGUCCCCAUGGACUGCUUCG	CCAGCAGGGAGCAGUAGACC	CAUGGAGGUGCCUAACGUCA	7.413e+06	3.61158e+06	1.17104	0.583153
ULA2	1217	H10	KLHDC8B	GUGAACACCAUGUCUGCAGG	GUGCCAUAGACCCGGCAAGU	AGUGUCUCAGCAGUGUCCAG	7195584	3.49084e+06	1.13669	0.563659
ULA2	1217	I10	KLHL1	UUUGAGCAGGCGACUCUGGC	GGGCCGCCGGUGGAAGGAGA	CGUAAAGCAUGUCAGGCUCU	7.3728e+06	3.854e+06	1.16469	0.622296
ULA2	1217	J10	KLHL10	UGCCAUGGAGAUGGAGAGCG	GGAGAGGAAGAUGAGUGCGA	GCUCUGCGACGUGGUCAUCA	7.54026e+06	3.68371e+06	1.19114	0.5948
ULA2	1217	K10	KLHL11	CACUCGAAAUCCUCGGCUUC	CAGUCCUGCCGAGCCGGCGG	GGCCGCGGCUGCAUCUCUUC	6845182	3.61974e+06	1.08134	0.584472
ULA2	1217	L10	KLHL12	ACUUACCUCACUAGUGAACA	CCCUGCCCAUCGGAUUGUGC	UCAAUUCAAUGAACUCCCUC	7.09181e+06	3.60872e+06	1.1203	0.582691
ULA2	1217	M10	KLHL13	UUCCAGGCGAAGCCAACGAC	GCUAUUACUGGAAAGCACGA	UUUCCUGCAUUGCUGAGCAC	7.04524e+06	3.50558e+06	1.11294	0.566037
ULA2	1217	N10	KLHL14	CCAUUGCCACAAGGCCGUGC	CGUGCAGCAGGUUGUCGCUG	GCUCGCCAUGUCCAGAUCCG	6.9778e+06	3.42169e+06	1.10229	0.552492
ULA2	1217	O10	KLHL15	GUAUGUUCAACUUAUAGAAG	AGUACAUAAAUUGCAGGACA	AGACAUGAGGGAACGAGAUC	7072873	3.44588e+06	1.11731	0.556399
ULA2	1217	B11	KLHL17	AGGAAGUCGCGGCUCAGCAA	AUGAGGAGGUCCUUGCAGUC	CGCAGCGCCGGGGACGUGUG	6.98738e+06	3.20135e+06	1.1038	0.516914
ULA2	1217	C11	KLHL18	GCGGCCGGGGAAGAUGGUGG	UAGUCGCGGCUACGGCGUCA	CCCAGUCCGCGGUACCUUGA	11363405	4.7379e+06	1.79509	0.765018
ULA2	1217	D11	KLHL2	UAUUUGAAGCAGUAAUAGCA	CCCGACUGAUGGAACAUGUA	GCCAGUGACACAGUGCUGUG	6.94426e+06	3.64132e+06	1.09699	0.587955
ULA2	1217	E11	KLHL20	GCACCGGGAGCUAUGUGAUG	UACUUCCGAGCUAUGUUUAC	UAGCCCUCUCGUCAAUGUCU	7.42675e+06	3866649	1.17321	0.624339
ULA2	1217	F11	KLHL21	CGACUUCCCGGCGCACCGUG	AGCAGGCUCAGGGCGUGCGC	CGAAGGCGCCAUGGAGCGAC	6.94307e+06	3.45136e+06	1.0968	0.557284
ULA2	1217	G11	KLHL22	AAUCCUCUUCGAUGUUGUGC	UAGGUGUUGUUCACGCAGUG	UGUCAGGAUGGCAGAGGAGC	7.63277e+06	3.77683e+06	1.20575	0.609836
ULA2	1217	H11	KLHL23	AAUUAUAUACAUUGUGGCUG	UUUGACAAAUGUUUGGAUUC	GCCCCCAGUUACAUAAAUGU	7249672	3.62124e+06	1.14524	0.584714
ULA2	1217	I11	KLHL24	GUAACAAUGGUACUAAUAUU	AUGGACCCCAAAUCUCUGAC	CUGGAGUAUGUUUUCGGCAU	7.06891e+06	3.5383e+06	1.11668	0.57132
ULA2	1217	J11	KLHL25	ACCGACGUCACACUCUGGGC	CUCCCACCCGGACUGUGUGC	UCCGCGACUUGCGGGUCUCA	7665448	3.8886e+06	1.21092	0.627884
ULA2	1217	K11	KLHL26	GCAGCACGGCCGACAAGAAC	CCUGAGCGCGGAGGGUGGCC	GACGACCUUGUGUGCAGGAA	7.01774e+06	3.36995e+06	1.1086	0.544137
ULA2	1217	L11	KLHL28	UUUGAAAUACGGGCUGACGC	UGUGACAUCAUUCUUCGAGU	GUUAGCAAGCAUGUAGGUCG	7411083	3453540	1.17073	0.557635
ULA2	1217	M11	KLHL29	GAUUGCACACUCCUAUGGAG	CCCCAGCUCCCGCUGAUGCC	UUGACCACCACGCUGCUCAG	7.29104e+06	3.82397e+06	1.15177	0.617448
ULA2	1217	N11	KLHL3	AGGCAUUGGCCUGCUGCAGA	GUUGCAUCCCACCAAUUGCC	AGCUGCAGCAAGCUGGCUGC	6.85483e+06	3.36985e+06	1.08286	0.544122
ULA2	1217	O11	KLHL30	GGUGCGGAACGUGGAUGACC	GACGUCACACUGCUGGUGGG	AGUAGGGGCUGCUGAGCGCC	9146096	3906395	1.44481	0.630757
ULA2	1217	B12	KLHL31	AAAAAGACCCGUCAAUUCAG	UACCAAUGACUAAGUCACAU	UUCUUAUGGCCCCAACCUCU	6.79087e+06	3.33985e+06	1.07276	0.539278
ULA2	1217	C12	KLHL32	AUUCGGAGUGGCAGAGCCUC	CAAUCAGGGUGAUGUCGCAG	AGCAUGCAGUGACUAUUUCC	8909046	4.04053e+06	1.40737	0.652414
ULA2	1217	D12	KLHL33	CAACCCAGGGGCUUCCGCCA	GUACCAGAGCUCUUCCUGCU	UGCUUACUCCGGAGUUGUGC	9.72759e+06	4.66483e+06	1.53667	0.753219
ULA2	1217	E12	KLHL34	AGUGACCUGCAGGUAGCUGG	UGCCUGGCUGUCGCUUUCCA	GAUCCACCUGCACGUGCCAU	8.48921e+06	4.28974e+06	1.34105	0.692655
ULA2	1217	F12	KLHL35	GAGCCUCGAGCAGCAGCGGG	AAGCGGGCGCCAGUAGCGGC	CGCGGCGGGCCGGCGCGUCG	7.93119e+06	3.9512e+06	1.2529	0.637992
ULA2	1217	G12	KLHL36	CUGGGCCGACCACUCAAGCA	CGACGUCGCAGAAGAGCCCG	CACGGCCAGCAGGUUGCGAU	7019467	3.42515e+06	1.10887	0.553052
ULA2	1217	H12	KLHL38	GAUCAUACCCAGGCAGUUGC	GGGGAACUGUAGCAUGGAGG	CUCCUACGUGUAUACGGGGG	7.65065e+06	3.54906e+06	1.20858	0.573058
ULA2	1217	I12	KLHL4	CCUGCUACGAUGUCAGUGUC	UUUCAAGGUUCCACCAACAC	CUCUUCAACCUGCCCUGAAC	6.71562e+06	3.41236e+06	1.06087	0.550986
ULA2	1217	J12	KLHL40	UAGGCCACCCACCAUGGCGC	CAGCAGACGCUCCUGCAAGA	CUCGACUGUGUGGUGCGGGC	7.63916e+06	3.63895e+06	1.20676	0.587573
ULA2	1217	K12	KLHL41	CUCACAGAAUGGAUUCCCAG	UAGACCAUCCUGAAGAAGGG	ACUUUUGUCACCUGCUUUUA	7.57553e+06	3631939	1.19671	0.586441
ULA2	1217	L12	KLHL42	GGACAGGAGUCCCAGUCAUC	CCCGUCCAUGCUCAGGUACG	CAGGUCGGGAGGAAGGUUGU	9571430	4.92338e+06	1.51201	0.794967
ULA2	1217	M12	KLHL5	UUCUACAGUUGACAGCCAGC	CGGUAACCAAUUGAAGCCAA	GUGGAUGCCAUUGGCCAAGA	7451984	3732390	1.17719	0.602661
ULA2	1217	N12	KLHL7	UGAGGGAGGAUGGCAGCCUC	CCGAGCAGCAAGUUUCUUCU	CAUGAAUAACAUGCGGAAAC	8.35315e+06	3.48572e+06	1.31955	0.562832
ULA2	1217	O12	KLHL8	GAAGCUUGGAAAGAUUUUCA	UCCUCAAUUAGUGAUGGUGA	CUAGGAAUCACAUUACAAAG	7115186	3.38082e+06	1.12399	0.545894
ULA2	1217	B13	KLHL9	CAUCUCCAUCACCUGGUACC	CAGCAAUACUCACAGUUCGG	CGCCCAUUUCGCCGUUACCA	6839002	3.0188e+06	1.08036	0.487439
ULA2	1217	C13	KMT2C	UUCAUUCUCUAACCUGAUUU	GACACAGAUCGCUGAAGAGU	CAAAGAACAAUCUGCAGAAG	7.64933e+06	3.74553e+06	1.20837	0.604783
ULA2	1217	D13	KMT2D	CCAGGUUCUCCUAGGUGGGC	CAGGGGACACCACUGGACAC	GCCCAGUCUACACGGGCAGC	6.0867e+06	2.48255e+06	0.96152	0.400852
ULA2	1217	E13	LATS1	GGUGGAUUUCUGACUUGUCG	AUGGUUUAGAUAAAUUCCUA	UUACUGGCAGGAAAGGUCUU	8.79788e+06	4.44907e+06	1.38981	0.718382
ULA2	1217	F13	LCMT1	UUCCCUCUGCCUAGUGGCCA	GCAGACGACGAGGGCGUGCG	UGCCUGUCGGGCGCGGGGUU	8268131	3962014	1.30612	0.639737
ULA2	1217	G13	LEO1	CUGAGGGGUCAUUGUCCUCA	GAGGGAGCUUCACAUCAUAG	CAGGAUGAAAGAGGUGAUUC	8.09517e+06	3.99931e+06	1.2788	0.645759
ULA2	1217	H13	LIMK1	UGACGGGGGUCACCACAGUC	UGGGAUGGACACCAGGGUGA	UGACCCCCCGCACGGCCCAC	9.2421e+06	3.96499e+06	1.45998	0.640218
ULA2	1217	I13	LMO7	AAGAUGAUAUGUCGUAUCGA	UUGGGUAAAAAACGAUUGAA	AUGAGGAUAACAGAAGAAGU	6.88332e+06	3.43201e+06	1.08736	0.554159
ULA2	1217	J13	LNPEP	UCCUUCAUGAAUAGAAGCUC	GGUCUGUGCUUUUGUCAUCG	UCUUUGGUAAAGGUACAUCU	7.21269e+06	3731530	1.13939	0.602522
ULA2	1217	K13	LNX1	UGUGUCCACACGGAGUGUCC	AGGUCAUCAUCCACUUCCUC	GAUCGUUGGCAGACUCUGGC	7.65876e+06	3.85375e+06	1.20986	0.622256
ULA2	1217	L13	LNX2	UCUCUUGUAAAAAGUUUCUG	GAAGGCAAAUAUGGCAGACU	UUGAAUGUGGCCAACAGCAC	6.81523e+06	3.35313e+06	1.07661	0.541422
ULA2	1217	M13	LONRF1	GGCCGCGGAGUCGGAGCGCU	CGCAGGGCCGAGGCCGGUUC	GGUCCUCGCCACCGCCGGAG	8.15798e+06	4.01297e+06	1.28872	0.647965
ULA2	1217	N13	LONRF2	UGUCUCUUUAAGCCAGCGCU	ACACUUUGAAGAGGAUAAAA	UCUGAGAAAUCUGAUAUGCU	7419374	3.70587e+06	1.17204	0.598379
ULA2	1217	O13	LONRF3	CCUUGAUGGUGGCCACUGGG	ACGUUGACUCGCAGCGGCGG	AGCGUCGCAACUCCGGCACG	7.02131e+06	3.6572e+06	1.10916	0.59052
ULA2	1217	B14	LRR1	CGAGAUGAAGCUACACUGUG	CGGCUCGGACGCCCUUGCCC	CCCGCGCUUGUCCUUCAGGG	1.25634e+07	4.35458e+06	1.98464	0.703123
ULA2	1217	C14	LRRC41	CUUACGCCGGCUGGCCAUCA	GGGCUCACGUCGGCCCCGCC	UCACCAUGAGUGCUGGCUUC	7.02682e+06	3.3477e+06	1.11003	0.540545
ULA2	1217	D14	LRRK2	CAGCUGUCAGGGGUGCGAAG	AGGCUGAACAAUGUCCAGGA	GUGUUCACGUACUCCGAGCG	7.82706e+06	3830316	1.23645	0.618472
ULA2	1217	E14	LRSAM1	GUCUCUUACAGAGUCAGGGC	AAGAUGGAAUCGAGAACUCU	AAGGGAGGAGUUAGAGUGGC	7903071	4.04697e+06	1.24845	0.653455
ULA2	1217	F14	LTN1	UCUUUUGCUGCAAACGCAGC	CCCAUUAAACUUUUUAAGUA	GUGUGGCUUCUCGGACGCGA	7.20025e+06	3551391	1.13743	0.573435
ULA2	1217	G14	MAD1L1	UACUGCAUCUGCAGAGAACC	AUCUCUCAGCGUGUGGAGGG	GAAAGCAACCAUGGAAGACC	6.72644e+06	3.41595e+06	1.06258	0.551566
ULA2	1217	H14	MAD2L1	CUCCGUUCCCCCCGAUAUAU	GAUUUCGGCGCUCCCGCGCA	GAUUUCGGCGCUCCCGCGCA	6.99687e+06	3.48386e+06	1.1053	0.562531
ULA2	1217	I14	MAD2L2	UGAGCAUGGGGUGAGAUGGC	GCACUGCGUCAAGCCACUCC	UGUGCAGAUGUCCUGCCACC	10994078	4.49503e+06	1.73674	0.725803
ULA2	1217	J14	MAEA	GCGUUUGUUCAGCGUCUCGU	CACCAUGGUGGUGGCCGAGC	GGUCAGCCUGCUGGACGGCG	7164218	3.37887e+06	1.13174	0.545578
ULA2	1217	K14	MAGEC2	GUACAAAGUGGAAGAGGCGG	CCAGUCUUCUAACUCAACUG	GUCGUCAUGCCUCCCGUUCC	7.22286e+06	3.4601e+06	1.141	0.558694
ULA2	1217	L14	MAGEL2	AUCAGGACCCCGGGAGUCGG	GCUGGGUCAUCGGAACCACC	UGCAGGCUUCAUUGGCCGCU	7.53773e+06	3852625	1.19074	0.622075
ULA2	1217	M14	MALT1	AGCUCUGAUGUAUUUCCAUU	UCACCUUUGAAUUCAGCCAG	UACUUACUCUGGAAGCUCUC	6.28846e+06	3.33822e+06	0.993392	0.539015
ULA2	1217	N14	MAP3K1	CCCGCGAGAGAAAAUGGCGG	GCUACGAGCCCUGAGGCAGG	UGCCGCGGGACUGCUGCGGG	8238706	3.84564e+06	1.30147	0.620946
ULA2	1217	O14	MAP3K7	UAACUUACUUUGGUGGUUUC	GUGAAGAUAAGCCACUCCUU	GCAGCAGUAUAAUAUGGCAA	7025191	3470285	1.10977	0.560339
ULA2	1217	B15	MAPK15	CCUUCCGGAUGACUGCGUUC	ACCGGGUGGCCCGCAGGAGC	GGCGGGGGAACCGCACCUUC	8.64487e+06	3.84545e+06	1.36564	0.620916
ULA2	1217	C15	MAPK9	UAUGAUUGACACAUUUUAAG	GAGUUUGGUUCUGAAAAGGA	CUGCAUUUGAUACAGUUCUU	6.9738e+06	3.60156e+06	1.10166	0.581535
ULA2	1217	D15	MARCHF1	CUGCAAGUAUGACUUCAUAA	ACCAGUCCUGCCUCCACCAG	CAGAAUCUGUCACUGCGAAG	8.04316e+06	4.05851e+06	1.27058	0.655318
ULA2	1217	E15	MARCHF10	CUCUGCUUUCCUUACAGUCA	UUGGUCAAUUGCUGGAAGUU	AGGAUGCUCUAACUGAACCA	7.74921e+06	3.79483e+06	1.22415	0.612742
ULA2	1217	F15	MARCHF11	UAGCGCGGGGCCGCGGGGAC	GGGAGGUUGCGGGGGAGGCU	CGGCACAACCAUGAGCUUUG	8.81543e+06	4.01457e+06	1.39258	0.648224
ULA2	1217	G15	MARCHF2	CUCCCGGUGGCCAUGACGAC	GGCUGCCGGAGCAGUCACAC	AAGUCACCUGUGCCACAUAC	6.80465e+06	3.68108e+06	1.07493	0.594376
ULA2	1217	H15	MARCHF3	UUCACAGUAGCUGGUGUUUG	GGACCUUGGGGACAAUUCAU	CACAUCGGCCGGUCAUUGAA	7.47886e+06	3.74425e+06	1.18144	0.604576
ULA2	1217	I15	MARCHF4	UGGCCGCCAAACCGGGGGGC	GCCGCAGUAAGAAAACCUUC	UGCUCCGGCUGGUACUGCUA	6901828	3.72134e+06	1.09029	0.600876
ULA2	1217	J15	MARCHF5	UUUUAAUUUACAGAAGUUGC	CUGAAUGGGUGAGACCAUGC	AGGAAACAGUACAGCCAGAG	7745039	3.53665e+06	1.22349	0.571055
ULA2	1217	K15	MARCHF6	UGAUUUUAGGCUCCAGCAGG	CCAGCUGAGAACGCAGUGGU	GGAAGAUGACGCUGGUGUGG	7.53542e+06	4.07299e+06	1.19037	0.657656
ULA2	1217	L15	MARCHF7	CGUCACCAUUUCAAUCUGCA	AAGAUCGCAGAACCAGCAAC	UGAGGUAGUACAGUUUGUAC	7153616	3.79912e+06	1.13006	0.613436
ULA2	1217	M15	MARCHF8	CUCCCACGUACUUUUCUCAG	GAGCUCGCAGCAGCGCGUGU	AAGCCUCCACUUCGUGCACC	7.16596e+06	3.56477e+06	1.13201	0.575596
ULA2	1217	N15	MARCHF9	GACCUUCUCGAUGACCGUCA	GCCAGGAGAUGCUGGCAACC	CUGCUCUUUCAGAUCUGCUA	7906220	4.01447e+06	1.24895	0.648207
ULA2	1217	O15	MASTL	GCAUUCCAACUCAUCAUUGU	GACGAAAGGUUUCAAUAAAA	AAGAGCGUCCAGUGGUGGGA	7.87615e+06	3.37836e+06	1.2442	0.545496
ULA2	1217	B16	MAVS	CCCACGGGAUGGUGUGAGGC	AGCCGCUUGCCUGGACCCAC	GCCCCUGCAGAGGCCAAGCC	7.13013e+06	3424030	1.12635	0.55287
ULA2	1217	C16	MBD5	UUGUUUGAAGUGCUGUUGGA	UGAUUCACUGGCAAAGAGAU	CUCCAGCCUUCAGCAGGAGA	7.83732e+06	3.37397e+06	1.23807	0.544787
ULA2	1217	D16	MBD6	CCCUUUGGCCCCGGUGACCC	CCGGCGGAAAGCUGUUGCUA	ACCAGGAGAAGAGUGUGAGC	8735292	4.32875e+06	1.37992	0.698953
ULA2	1217	E16	MCRS1	UAGGGAUGGUGCCCAAGGCC	CUCCUCAUCCUCUGAGCGGC	CUCUCUUGCUAGAUUCUCAG	6241294	2.99167e+06	0.985941	0.483057
ULA2	1217	F16	MDM2	GAAAAUUCAGAUGAAUUAUC	CAGAGCCAGGCUUUCAUCAA	UACAGGGACGCCAUCGAAUC	1.01493e+07	4.63531e+06	1.60329	0.748453
ULA2	1217	G16	MDM4	AUGCAGGUCAUGCACUAUUU	AUAUUGUGGUGGAGAUCUUU	UUUUUACCUUGGGUCUUUCA	8112420	3.92205e+06	1.28153	0.633285
ULA2	1217	H16	MED1	AAAAGAACUAUUCUGAAAGA	AAAUCUGAUCAGACACCAAG	CCAGAUGGCCGAAGUCUACA	8966216	3.88693e+06	1.4164	0.627614
ULA2	1217	I16	MED10	GCUUUUGGUUGAGCCCGGCC	UGUUCUCCACGAACUUCUCC	GGGACGGGCCGAGGCGAUGG	1.10359e+07	4.41998e+06	1.74335	0.713684
ULA2	1217	J16	MED11	UUUUUUCCUUGGACAAUUCU	CGCUUCAGUGCAACACGUGG	CAGACACACCGACCUGGGUG	1.03006e+07	5.1115e+06	1.6272	0.825342
ULA2	1217	K16	MED12	UGCAAUAAUGCUGCUGAAGU	AGUUAUCCUUCUGGUUCACU	GUCAGUGAACCAAGUGUUAA	9.88973e+06	4.04158e+06	1.56229	0.652585
ULA2	1217	L16	MED17	CAGCGGGGGCAGGUACGUCU	CUGGCUGAAGUCUAUCCGCU	GGGCGACGCGCAGGAGUGGC	9.49121e+06	4.46004e+06	1.49933	0.720153
ULA2	1217	M16	MED18	AACCACGAAGGCGGUGGAUG	UAAGGAGGAAUACCAUCUCA	CGACGCUCUAUGGACAGGGC	8.17642e+06	3.78232e+06	1.29163	0.610722
ULA2	1217	N16	MED20	CAAGGGUAGAGGCGGCCGUA	GCAUCUCCAAUUUCCGGGUA	GUCCCAGAUGCCUGUGGCCG	1.05508e+07	4.51953e+06	1.66672	0.729758
ULA2	1217	O16	MED21	AUUGGAGUAUUGCAGCAAUG	AAACCUGUUUACCUUCUGUA	CUCAAGAAAUCUAAUUUUAA	9180701	3.95429e+06	1.45028	0.63849
ULA2	1217	B17	MED24	GGCCGGCACUCCAGCCGCUG	CCACUGGCUGCUGCGCUGCA	UAGCUGUCACGGCAAAGCAG	10247549	3.88288e+06	1.61881	0.62696
ULA2	1217	C17	MED27	AUAAGUGGUCAAACAAGGUA	CUCUUUGCUUUUCAGUGAGC	CUCUUUGCUUUUCAGUGAGC	9567944	4.52355e+06	1.51145	0.730408
ULA2	1217	D17	MED30	GGCCAACGGAGGGGUGGACA	ACGGCGUCGCUGUGCCGCAU	GCUGGAAGAUCUCCAUGGUG	11555945	3.25531e+06	1.8255	0.525628
ULA2	1217	E17	MED31	AAUAAAGUAUACACAUGCUU	AUCUUAAAUACUUGCUUUAC	UUUUCAGUUCUUGCCCAAAG	8590900	4.20409e+06	1.35711	0.678825
ULA2	1217	F17	MED7	AUCCGCCCUUUGGAAAGUCA	AUCAUGUAACUGUCUUUUAU	UUGAUAUAUUGCAUUGGAGG	8720563	4.35721e+06	1.37759	0.703549
ULA2	1217	G17	MED8	ACGACAGAUGCUGCCCGCAU	GGCUUGGUUCUCAGAUGGUC	GUGUUACAGCGGCAGACUGA	8258380	3.82454e+06	1.30458	0.617539
ULA2	1217	H17	MEX3A	CUGACUUGUUGCGGGAGGCA	GUUCAUGGUGACAGGGCGAC	CUGCAAGAUUAAGGCCUUGA	7.45113e+06	3.32576e+06	1.17706	0.537004
ULA2	1217	I17	MEX3B	CGUCACUGUCCAGCCCCAGC	CAGCGGAGGGGGAGAGACCC	CAGGUCUGCGAACAGCGAGC	10261378	4.26161e+06	1.621	0.688112
ULA2	1217	J17	MEX3C	UGACGCUCUUUCUCCGGAGC	CCCCGGCGGUUGUGGGGCGG	UACGGAGGGGACGAUGCCCA	9905253	4.22863e+06	1.56474	0.682787
ULA2	1217	K17	MEX3D	AGCAAGGCCGGGGGUCUGCC	CGCCGACAGGAUCUCACGCU	CCGCACUGGGGUCUUGAUGU	7463223	3.92491e+06	1.17897	0.633747
ULA2	1217	L17	MGRN1	CGAUGCCGACAGCCCCACCG	CGGCGUCGAAGGUGAACUCC	GCAUCGGAGGAGUUCCUGAA	8684164	3.96968e+06	1.37184	0.640975
ULA2	1217	M17	MIB1	AAUAACCGGGUGAUGGUGGA	GGACGGCGGCGAGGGCCAUG	GUGGUGGUAGUGUGGGACAA	8.46399e+06	4.01801e+06	1.33706	0.648779
ULA2	1217	N17	MIB2	AGCAGUCACAGAUGAUGUUG	GGUCGUAGUCCAGGCACACA	GCGAGUGAGCGGUCUCGUAG	7.53412e+06	3.61332e+06	1.19017	0.583434
ULA2	1217	O17	MID1	CGUCUAGACCUCGCUGGCUG	GAUGGACUCCACAGACUCGU	UAUUUGUCUGGAGCUCUUUG	6.78767e+06	3.12022e+06	1.07225	0.503814
ULA2	1217	B18	MID2	GAAAGCAGUAAUGGGUUCAA	GGGGCCUGGAUGGCCUCAAG	CUUUCCCGGCGGCUCUCACU	7.94825e+06	3625313	1.25559	0.585371
ULA2	1217	C18	MINDY1	GGCCCUCCCACCCUCACCUG	CAGGUCAAAGACACUGCACU	AAUGACAGUGCUGCCUAAAC	10750260	4.23247e+06	1.69823	0.683407
ULA2	1217	D18	MINDY2	GAAGAACCUGUCCCUGACGC	GUAUGGGCGGCGGAGACCAG	CCGGACUCGGCUUCUCCCGC	9353404	4.85994e+06	1.47756	0.784724
ULA2	1217	E18	MINDY3	CGUCACAGGCGGACUCUCGC	CCAGGGUACCUUGCGUCCAG	CAUCAGCUCUUUAGUCAGUU	7.28231e+06	3695765	1.15039	0.596747
ULA2	1217	F18	MKRN1	CCGCGCAACGUCCUACCUGC	GCCCGCCCCCAGGGACGGGG	AGGAGCGGCAGCGGCGACGG	10180274	4666554	1.60818	0.753498
ULA2	1217	G18	MKRN2	AUCUCUCUGGCAUGGCUGAA	UCAUCUCGGGGCUGGGCUGG	UGCUGGCCUCCACGUCAUCA	8552766	4.03776e+06	1.35109	0.651967
ULA2	1217	H18	MKRN3	AGCUCCCUCAGAAGCCCACG	GGCUCACAGACGGGAAGGUC	GCCACAUGCGGCAAGGGGCU	8644689	3.92569e+06	1.36561	0.633872
ULA2	1217	I18	MNAT1	AGGGCAACCCUGAUCGUCCA	CACAUUCACCAUCAGCUUCA	AGACGAGGCCUAGCAUCUCC	7.7719e+06	3.66627e+06	1.22773	0.591984
ULA2	1217	J18	MPHOSPH8	UUUCUGAGAAUAAUCGGAAA	CUUGGUUUUGUGAUCGUCUA	CAUUGCUGCAGAAGGUGAUC	7.12924e+06	3.33395e+06	1.12621	0.538326
ULA2	1217	K18	MPND	UGCGGGCGAGGAGGCGCCGG	GCUCCCGCAUUCGGCCGCUC	CGCCUGGUGAGCGCGCCCCC	9.95798e+06	4.9657e+06	1.57307	0.8018
ULA2	1217	L18	MSL2	CAAAGUAAAGGAUGAAUCUG	UGACUGUUCUUCUGAUAUUU	GUUUUUUGUAGCAGUUCACU	7.47816e+06	3.8473e+06	1.18133	0.621215
ULA2	1217	M18	MTA1	UCCUUCAGGGGAAAUAGAAG	GGUGCUUUAGUUUCUCGGGC	CUCUGCCCGCCACGCACAUC	7047260	3.42007e+06	1.11326	0.552231
ULA2	1217	N18	MTOR	GGUAAAAGUGUCCCCUGCCA	CAUGACAACUGGGUCAUUGG	UCCCACCUUCCACUCCUAUG	7.83065e+06	2.71006e+06	1.23701	0.437588
ULA2	1217	O18	MUL1	CCUUGAGCUCUUGGGAGACC	CCACAGAGGUGGUGCCCAGG	CUCGCCGCCGUCAUGGAGAG	8.50585e+06	3.96659e+06	1.34367	0.640477
ULA2	1217	B19	MYC	GCUGCACCGAGUCGUAGUCG	GCAGAGCGAGCUGCAGCCCC	CGGAGCGGCGGCUAGGGGAC	8033879	4.19873e+06	1.26912	0.67796
ULA2	1217	C19	MYCBP2	CACCCUGGGGACGCACCUGG	UGCGCUCAAUGACAGGGACC	GCAGCAGCUGGUAGUGACCC	7.70065e+06	3.95322e+06	1.21648	0.638317
ULA2	1217	D19	MYLIP	GUGUCGGCAAUGGAAAACUA	CUCAUUGGGGUUGGACCUGA	UCUUGGCUUACCUAUUAAUU	6752514	3.42772e+06	1.0667	0.553466
ULA2	1217	E19	MYSM1	ACUUAGAAAAGAGAGCUUCC	GUUUCAUGCAUUUUACUAUU	AGUAGACAUCACAGAUGAGG	7.24521e+06	3.59313e+06	1.14453	0.580174
ULA2	1217	F19	N4BP1	CUCUGAUUCUUUCUGACUAC	CACUUCCUCUGAUGCCAAGA	GUUUCUGAAAAGCUUGAUUC	6.91455e+06	3.33291e+06	1.0923	0.538158
ULA2	1217	G19	NAIP	UUCAAAAGGAACCCACAAUC	ACUUCACUGGGGUAAAAUCU	CUUAUGAGCCGUACAGCUCA	7028543	3.61711e+06	1.1103	0.584047
ULA2	1217	H19	NDFIP1	UGCAGCAUAUUUUGACUACA	ACUGCCCAGUUAUGAUGAAG	CAAAUUAUACUCACUCUCCC	6.88662e+06	3.36144e+06	1.08788	0.542764
ULA2	1217	I19	NDFIP2	CUCUUAGCUUCUUAAUGAAG	GGUGCUGGGUUUGAAGUAGG	ACCAUAUAGUAGUAUUACUG	8.38214e+06	3.97527e+06	1.32413	0.641877
ULA2	1217	J19	NEDD4	CAUCUUACUGAGCUCGAUGC	AAUUCUUCUGCAAGAUGAGU	GAAGGCCUGGUUGCUAUACA	8737274	4.28376e+06	1.38023	0.691688
ULA2	1217	K19	NEDD4L	CUCGGCUUCUCAGCACCAAG	GUCCACUUUUUCUUCCCACC	GCUUGGUCUGUGCCACUGAG	7.03718e+06	3.59883e+06	1.11167	0.581095
ULA2	1217	L19	NEDD8	GCAGACAGCAUGAGAGCAAA	GCAUGCAUCACCUUGUCUGU	UGCCUGUUUCAGACGCUGAC	9938621	7.78636e+06	1.57001	1.25725
ULA2	1217	M19	NEURL1	UCACCAAGAAGCAGUGCUGC	CACUCUGGGACACCAGGUCG	UGCGAUGAUGUUGCCCUCAU	7319056	3.53932e+06	1.1562	0.571486
ULA2	1217	N19	NEURL1B	GCCACUCGCGCCGGGCCACA	GCCCAUCCGGCUGUACGAGC	UCCUGGGCGCUCAUGAGCGA	7.42182e+06	3.67232e+06	1.17243	0.592962
ULA2	1217	O19	NEURL2	GCGGCUGAAGCACACGCCGU	UGUUGGCACCGUGCACCCGA	GUGGAUUCGGGUGCACUCUG	7.06717e+06	3474625	1.11641	0.56104
ULA2	1217	B20	NEURL3	GUGUGGCGCUGCGAGUGCUG	AGGCGCACCACGUUCCACGA	GUGCGCCCUUGGCCUCGGCA	7.35759e+06	3.41549e+06	1.16228	0.551492
ULA2	1217	C20	NEUROD2	UUGGCCGCCCGGGCUGGCCC	GCGUCGCCCUUGUCGCUCCU	GGCCGGGCUCGCUGAACAGG	8.0565e+06	3.87549e+06	1.27269	0.625767
ULA2	1217	D20	NFE2L2	UAGUUGUAACUGAGCGAAAA	GCGACGGAAAGAGUAUGAGC	AUUUGAUUGACAUACUUUGG	7.84535e+06	3.32645e+06	1.23934	0.537114
ULA2	1217	E20	NFKBIA	CUCGUACUCCUCGUCUUUCA	UCCUUCUUCAGCCCGUCGCG	CGUCCGCGCCAUGUUCCAGG	8.77016e+06	3.96011e+06	1.38543	0.639431
ULA2	1217	F20	NFRKB	ACAUCCUCCAGAAGGUCCUC	CCUCCAUGAUGCGCGUGCCA	AUCUGUCAGCAUAUGGUCUA	7.37387e+06	4064742	1.16486	0.656325
ULA2	1217	G20	NGF	GGCGAUAGCUGCACGCGUGG	AAGUUUAGUCCAGUGGGCUU	AGCUUUUCUGAUCGGCAUAC	6.99458e+06	3.35553e+06	1.10494	0.541809
ULA2	1217	H20	NHLRC1	CUGCGGCCACGUGGUCUGCC	GAUCAGCCUGCUCGAGUGCA	CGCCAUGGCGGCCGAAGCCU	6.76349e+06	3.49142e+06	1.06843	0.563751
ULA2	1217	I20	NLRC3	UAGGACACCGGAUGCCCCGC	CCCAGCCAGCAGAUCCAUGA	GCAAGAGGUGCGGACGGGCA	7453469	3.68249e+06	1.17743	0.594604
ULA2	1217	J20	NLRC4	AUUCACAUGAUUUUGAAAAA	UCAGAACAUUCCAUACAAAU	CGAGCCCUUAUUCAAAGAAU	7.05898e+06	3.55918e+06	1.11511	0.574692
ULA2	1217	K20	NLRP3	GCUCAGAAUGCUCAUCAUCG	GAUGAUGUUGGACUGGGCGU	CAAGGCUCACCUCUCGACAG	7.39404e+06	3554594	1.16804	0.573952
ULA2	1217	L20	NMI	AAAAAUAUGACCAUGUUAUU	UGUCCUUUUUGUAUCUCAUA	GACAACUGGCUGUCAUUCUC	6.8184e+06	3.49747e+06	1.07711	0.564729
ULA2	1217	M20	NOD1	GCUGAAGAAUGACUACUUCU	GAAAAGCAAUCGGGAACUUC	ACUUUAACUAUGGAAGAGCA	6.65599e+06	3.29474e+06	1.05145	0.531993
ULA2	1217	N20	NOD2	GUGCUCGCAGGAGGCUUUUC	GACACUCUCGAAGCCUUCCA	CUACGAGGGCUUCCACCUCC	8080686	4.14523e+06	1.27651	0.669321
ULA2	1217	O20	NOSIP	CUCACGUGACAACAGGAUCG	CGAAGUCCUUCACGGCAUCC	AUCUCUGUCCCCAGCGGCCU	7.24147e+06	3.70945e+06	1.14394	0.598956
ULA2	1217	B21	NPEPPS	UAGGUGAAGAUUGUCCCCAG	AAUUUUUAGUUUGGCCUGGU	AAAUGUCAAACCAGACCAAU	7.73182e+06	3.47071e+06	1.2214	0.560408
ULA2	1217	C21	NPM1	AUUUACAGGUUGUGAACUAA	GUACCGUUCUUAAAGAUAAC	CCUUUUAGUUUCUAUUCAUG	7.17876e+06	3.64645e+06	1.13403	0.588784
ULA2	1217	D21	NSD1	UGAACAUUCUGCAGAUGAGA	UGGAUUAUCAGAGCUCUUUC	GGAAAGAUUCCAGAGAACCU	8.21288e+06	4.10215e+06	1.29739	0.662364
ULA2	1217	E21	NSD2	UUGGCACUGCCGAGGAUUUC	CUCCAGUAGCCUGCAGGAGG	CAGCUUGUCGGCUGGAAUAA	7.67033e+06	3.68232e+06	1.21169	0.594576
ULA2	1217	F21	NSD3	GAUGGAUACCCAUUUGUGAG	UAUGAAGCUACUUUGCAGCA	UUGGCGGAGUCAAUGAGUUG	7.67785e+06	3.66314e+06	1.21288	0.591479
ULA2	1217	G21	NSMCE1	GGAAACGGUACUCACGGUCA	GAUGACCCAUGGCGUGCUAG	CCCACAUGCAGGGCAGCACA	7.30009e+06	3.65327e+06	1.1532	0.589884
ULA2	1217	H21	NSMCE3	CCGGCCCGCGGGACGUGCUC	UGGAGCCAUAGCGGAAACCC	GAGACAUGUUGCAAAAACCG	7561792	3844229	1.19454	0.620719
ULA2	1217	I21	NUB1	GGGAAAACCCUUGAAGAACA	GAGGAAAAACUUCCAGUUAG	CAGUAUUUCUAGUCCUCUCU	7.79603e+06	3.81552e+06	1.23154	0.616083
ULA2	1217	J21	NXN	GCUGGCGCUGAGCUGCGCGC	ACCCAGCAGCGAGAUGCCGC	GGCCAGGAUGUCGGGCUUCC	7.43919e+06	3.74587e+06	1.17517	0.604837
ULA2	1217	K21	OGT	AUCUGCUCACUUUAGCACUC	GGAAUGUGUACAAGGAAAGA	AUAUAACCAUCGAUGAAAUC	9.48004e+06	4.8882e+06	1.49757	0.789287
ULA2	1217	L21	OS9	AGGGGAACGAAAGAUGGCGG	UUACCCGCAAGUCUGACCGG	UGCCCUCCCAUGACAGGCAA	8837498	4.14166e+06	1.39607	0.668745
ULA2	1217	M21	OTUB1	CCCUCCGUGGCUGCAGUUCA	GGCCAGCAGGUCGGCGACAG	GCAGCCGCAGGUAGACCACA	7.45962e+06	3.66345e+06	1.1784	0.591529
ULA2	1217	N21	OTUB2	CCCCUCAGGAACUCAGCAAA	GAACUGCUUCUACAGGGCCU	GGAGAUCUUCAAGUGAGUGC	7.38674e+06	3.34883e+06	1.16689	0.540728
ULA2	1217	O21	OTUD1	CCGGGGCCCCGGCGGGGUAG	CUGCAGCCCCCGGGAGCCGC	AGCGGCGGCUUCCCGGUGCU	7447034	3553415	1.17641	0.573762
ULA2	1217	B22	OTUD3	CGCCGCCUGCUUUCGGGACA	GUCCCGCUUGCGCUCGGCCU	CGGAAUCGGCCGGAGUCUGG	7026815	3.33189e+06	1.11003	0.537992
ULA2	1217	C22	OTUD4	AUUUAAAAUUAUAGCUUAUG	UGAAAAAUUCUUACCUUUUC	GAAAGAUUUUAUAAUUUAUC	9.496e+06	4.13197e+06	1.50009	0.66718
ULA2	1217	D22	OTUD5	UGCGCCGACCUCCUCACGCU	GCGGCGACGUCAAGCUCCCG	UGUGGGUGGUGCCGUAGGCG	7.41245e+06	3.7433e+06	1.17095	0.604422
ULA2	1217	E22	OTUD6A	AUGCGCUGCUGUUCACUCUU	GAUCCGGAGCUUAAAAAACU	CCGGUGCUUCUGAGCCAUCU	7.12742e+06	3.28988e+06	1.12592	0.531209
ULA2	1217	F22	OTUD6B	GGCUUUUCAGCCAAAAUUCA	GGCCAAGUUGGAAAAAGAAA	GCUGACUACUAAGGAGAAUA	7.24244e+06	3.6239e+06	1.14409	0.585142
ULA2	1217	G22	OTUD7A	UCGUCCUGCCUCUGCAGGCA	CAUGUGUUCAAUGAAGGGCG	AGUCGCUCAGAGCGGCUGUC	7.38103e+06	4.08211e+06	1.16599	0.659129
ULA2	1217	H22	OTUD7B	CGAUGUCAUCCUGCCGCUGG	CCACUCCCCUCACUAAAGGA	CUGUUCAAAAUCACUGAGGG	8.45186e+06	3.6859e+06	1.33515	0.595154
ULA2	1217	I22	OTULIN	CGCGAGCGACCGCAUGAGUC	CGGCCACGGCGCGGGACGGC	CGCGGACUCACUGCUCGGCC	7.91012e+06	3.88677e+06	1.24957	0.627589
ULA2	1217	J22	PAF1	UUGGGGUCGAAGGGGAUAUC	UAAUGUUCCUAGGUCUGGAG	CCCACCGGACUCUGCCUGAG	11981257	5.23473e+06	1.89269	0.84524
ULA2	1217	K22	PAN2	CUUGGAGGCUCUUCCCGUCC	UAGCAGACUUGGGUUCAGGU	AUCGUCAUCAUGAACUUUGA	8.24502e+06	3.99212e+06	1.30247	0.644598
ULA2	1217	L22	PARK2	GAGGAAUGACUGGACUGUGC	UGCUAAGCGACAGGGGGUUC	CGACCUCCACUGGGAAACCA	7.60748e+06	4.03016e+06	1.20176	0.65074
ULA2	1217	M22	PARK7	UAGAUUAAGGUCACCGUUGC	CAGGACAAAUGACCACAUCA	CAUGGAGUUAUUCCUUCAUA	7.13307e+06	3.68812e+06	1.12682	0.595513
ULA2	1217	N22	PARP10	GUGUUGAGCUGGCAGAGACU	AGCAGCUCGUCGGGCACGGC	CCGUCCCAGGGUUGCAAUGG	8.45999e+06	3.72816e+06	1.33643	0.601977
ULA2	1217	O22	PARP11	CUAAAAACACACAACUAUUA	GUAAAAGAAAUGGAGCCACA	GAACACUGACUGUUGGUAUC	7.37663e+06	3.53174e+06	1.16529	0.570262
ULA2	1217	B23	SMARCA2				4505547	1.5402e+06	0.711744	0.248693
ULA2	1217	C23	SMARCA2				4302542	1.853e+06	0.679675	0.2992
ULA2	1217	D23	CUL1	CCCUCACAAUGUCGUCAACC	AUCUGGGACGACCUCAGAGC	CGUGUAGAGCUCCAUAUAUC	7.64204e+06	5.91143e+06	1.20722	0.954505
ULA2	1217	E23	CUL1	CCCUCACAAUGUCGUCAACC	AUCUGGGACGACCUCAGAGC	CGUGUAGAGCUCCAUAUAUC	7447266	6.05486e+06	1.17645	0.977664
ULA2	1217	F23	OR5M9	UAAGGCAAUGCCUAAUUUCA	AACCUGUAGCUCCUGACGAC	AUCACUCUGUUGGGAAAUAU	8429690	3.82584e+06	1.33164	0.617749
ULA2	1217	G23	OR5M9	UAAGGCAAUGCCUAAUUUCA	AACCUGUAGCUCCUGACGAC	AUCACUCUGUUGGGAAAUAU	8055215	3908154	1.27249	0.631041
ULA2	1217	H23	OR6N1	GAGCAAUGGACACAGGGAAC	AAUCUGGACACCCUGGAGAU	AGACCACCAGGAAUAUCAGC	8284446	3.82484e+06	1.3087	0.617589
ULA2	1217	I23	OR6N1	GAGCAAUGGACACAGGGAAC	AAUCUGGACACCCUGGAGAU	AGACCACCAGGAAUAUCAGC	8352318	3.61194e+06	1.31942	0.583211
ULA2	1217	J23	PLK1	GGCCCCGCACAUAGCGCCGC	CUCGGACGCGGACACCAAGG	UGCUGCUCAAGCCGCACCAG	8507497	2.05912e+06	1.34394	0.332482
ULA2	1217	K23	PLK1	GGCCCCGCACAUAGCGCCGC	CUCGGACGCGGACACCAAGG	UGCUGCUCAAGCCGCACCAG	8844972	2.52825e+06	1.39725	0.40823
ULA2	1217	L23	DMSO+RNAiMAX				6444599	6.28255e+06	1.01806	1.01443
ULA2	1217	M23	DMSO+RNAiMAX				6345215	6.33502e+06	1.00236	1.0229
ULA2	1217	N23	Cmpd 4+RNAiMAX				2962336	3.05759e+06	0.467962	0.493702
ULA2	1217	O23	Cmpd 4+RNAiMAX				3.01881e+06	2.89712e+06	0.476883	0.467792
ULA3	1216	B2	SMARCA2				4.15819e+06	1709469	0.664133	0.277968
ULA3	1216	C2	SMARCA2				4292954	1.51774e+06	0.685657	0.246791
ULA3	1216	D2	CUL1	CCCUCACAAUGUCGUCAACC	AUCUGGGACGACCUCAGAGC	CGUGUAGAGCUCCAUAUAUC	7007515	5.79336e+06	1.11922	0.942028
ULA3	1216	E2	CUL1	CCCUCACAAUGUCGUCAACC	AUCUGGGACGACCUCAGAGC	CGUGUAGAGCUCCAUAUAUC	7.33047e+06	6.03294e+06	1.1708	0.980985
ULA3	1216	F2	OR5M9	UAAGGCAAUGCCUAAUUUCA	AACCUGUAGCUCCUGACGAC	AUCACUCUGUUGGGAAAUAU	7.65005e+06	3.70453e+06	1.22184	0.602374
ULA3	1216	G2	OR5M9	UAAGGCAAUGCCUAAUUUCA	AACCUGUAGCUCCUGACGAC	AUCACUCUGUUGGGAAAUAU	8132662	3.89884e+06	1.29892	0.63397
ULA3	1216	H2	OR6N1	GAGCAAUGGACACAGGGAAC	AAUCUGGACACCCUGGAGAU	AGACCACCAGGAAUAUCAGC	7.56758e+06	4.05259e+06	1.20867	0.658971
ULA3	1216	I2	OR6N1	GAGCAAUGGACACAGGGAAC	AAUCUGGACACCCUGGAGAU	AGACCACCAGGAAUAUCAGC	7.56111e+06	3.79399e+06	1.20764	0.616921
ULA3	1216	J2	PLK1	GGCCCCGCACAUAGCGCCGC	CUCGGACGCGGACACCAAGG	UGCUGCUCAAGCCGCACCAG	7444104	2.14975e+06	1.18895	0.34956
ULA3	1216	K2	PLK1	GGCCCCGCACAUAGCGCCGC	CUCGGACGCGGACACCAAGG	UGCUGCUCAAGCCGCACCAG	8406887	2.58652e+06	1.34272	0.42058
ULA3	1216	L2	DMSO+RNAiMAX				6216933	6.50763e+06	0.992948	1.05817
ULA3	1216	M2	DMSO+RNAiMAX				6.49739e+06	6.10895e+06	1.03774	0.993345
ULA3	1216	N2	Cmpd 4+RNAiMAX				3.20811e+06	3.57041e+06	0.512388	0.580566
ULA3	1216	O2	Cmpd 4+RNAiMAX				3.18637e+06	3.00981e+06	0.508916	0.489409
ULA3	1216	B3	PDZRN4	GGAAGCUUUUCGCAAUGCCA	UAGUAGACCAGCCUAUGGGA	CUUCGAACACAUCAUGGCUC	7.14079e+06	3.62226e+06	1.1405	0.588997
ULA3	1216	C3	PEF1	GAGACUCACUUAUCAUCAUG	GAAGGAGCUAAAGCAGGCCC	CCUCAGGAUCCACAUUGGGA	7.59918e+06	3.42155e+06	1.21372	0.556361
ULA3	1216	D3	PELI1	UAGCCUACGUGAAACCAGAU	AAGACUCCAAGCCUGGAAUA	UCCAUCUGAUGUCUUCCAUU	6.80735e+06	3.7399e+06	1.08725	0.608126
ULA3	1216	E3	PELI2	CUGUGACAACGAAGUCGAUA	CCUGUCGCACACGAUCCUGC	UUUGGAAGAGUCAAAUCCGG	6455214	3.28508e+06	1.03101	0.53417
ULA3	1216	F3	PELI3	CACUCUGCCCAGAAUGGUGC	AACCUCAGACCUCCAGCACC	UGAAGAUGCGCAGCCAGGCG	7.62721e+06	4024104	1.21819	0.654339
ULA3	1216	G3	PER2	CCCCGUGGAGCAGUUUUCGU	CUGGGGCUCCACGGGCUCCU	GCCCAGCAUGAAUGGAUACG	8.10938e+06	4091651	1.2952	0.665322
ULA3	1216	H3	PEX10	CCCCCUGGAGCAGGAGCUGC	GAGGGCACAUGUAUCCGCGA	CCUCGCAGGCUACCAGACCC	9217201	4.1932e+06	1.47214	0.681835
ULA3	1216	I3	PEX12	CUUGACCACAUGCUGAAGAG	CAUCUUUGAGGUGGUAGCAC	GGAAACUAUGGCUGAGCACG	7.00565e+06	3.72097e+06	1.11892	0.605047
ULA3	1216	J3	PEX2	GUUAGCUCGCUUUGAGCCAG	GGGACCAAACUAGCUGCUCC	ACUCUUCGCAUUCUCUUUUC	6.77219e+06	3.6573e+06	1.08163	0.594695
ULA3	1216	K3	PEX5	UGGCGGUCACCAUGGCAAUG	GGCGAGCUUCAUGAGCGGGU	UCAGAGGCCGGGGCUCCGGG	9.65214e+06	4634714	1.54161	0.753627
ULA3	1216	L3	PHC1	CUGUACCACACAGAUCAAUC	GGCUUACCCGUAGAUACAUC	GGCUUACCCGUAGAUACAUC	7.02913e+06	3907925	1.12267	0.635448
ULA3	1216	M3	PHF14	UCGACGAAACCGACCACUUC	CAUGGAUGACUAUGACAGUG	GAGAUCUGCGUCUCAGAAAG	5.89379e+06	3.22221e+06	0.941337	0.523947
ULA3	1216	N3	PHF21A	UACCUGUGAAGCAGUCAGGU	UGUUGUUGUAGUUGCUGUAG	AUUGUGGCAAUGGCUGUAUU	7.08367e+06	3.83561e+06	1.13138	0.623689
ULA3	1216	O3	PHF23	ACCGAAAGAACCGAAAGUUG	GGGCCGGGAGGUAUGUGUCA	GACUCUCUCUUUGAUCUGGA	7.42103e+06	3785942	1.18526	0.615613
ULA3	1216	B4	PHF7	CAUGUUGGAUGUUCUGUGUU	GAUGUUCUCAACACUCUGUU	GCCCCACCUGUAUGCACUUG	7.00103e+06	3.64603e+06	1.11818	0.592862
ULA3	1216	C4	PHRF1	UCCGAGGAUUCUGAAGACGA	CAGGGGAAACUGGAAGCCGC	AGACCAGGCCGUGGGGACGC	7.70129e+06	3995565	1.23002	0.649698
ULA3	1216	D4	PIN1	ACCACUGCUGCUGUUGCCGC	UCACCAGCAGGUGCGAGCAG	GGAGAAGAUCACCCGGACCA	6.5167e+06	3.27787e+06	1.04083	0.532998
ULA3	1216	E4	PINK1	CGCCACCAUGGCGGUGCGAC	CUGCGCUUCACGGGCAAGCC	CGGCGGCGGGCUGUGUCCGC	6521500	3.19523e+06	1.04159	0.519559
ULA3	1216	F4	PINX1	GAAAUGUCAGACCCUGGAAC	CUUGGCAAAGUACUCCUGGA	CUCCUCUGGAGUGGAGGGAC	6862140	3650778	1.096	0.593634
ULA3	1216	G4	PJA1	UGAUCUGUGCAUUGGGACUU	CACCCACGAGCCAGCGGGAA	GUAUGGCCCAAUCCAACAGG	6.28909e+06	3.39747e+06	1.00447	0.552446
ULA3	1216	H4	PJA2	CUGUAUUGCCUAAUGAUUCC	UAUGAUCCAGAUGGCAAACA	CUUGAAGCACUACAAGCUCC	6765073	3.72831e+06	1.0805	0.606241
ULA3	1216	I4	PLAA	GGUGGUGCGGUCUCGGGACA	GUACGUCCAGCUCGUGGCCC	CAGACACUGGCCAUGACGAG	8.06741e+06	3957697	1.2885	0.643541
ULA3	1216	J4	PLK1	GGCCCCGCACAUAGCGCCGC	CUCGGACGCGGACACCAAGG	UGCUGCUCAAGCCGCACCAG	8.57312e+06	3.05357e+06	1.36927	0.496526
ULA3	1216	K4	PML	GGUUCACGCGCAGAUGCACG	GCGCUCGCGGAUCAGCUCCU	GCGGUACCAGCGCGACUACG	6.92668e+06	4012475	1.10631	0.652448
ULA3	1216	L4	POLB	GGCCGCCAUGAGCAAACGGA	GUGCUAACCUGUGAGCAUGU	GUCGGUGUGGGAGAGAAGGA	10058047	4.5152e+06	1.60644	0.734193
ULA3	1216	M4	PPIL2	AUAAUAAGACGGGUCCUGUU	GAGCUCUACAAGGAGUUCAA	GUCCACUUUCUUCUUCUCCG	7.36092e+06	3.63536e+06	1.17566	0.591128
ULA3	1216	N4	PRICKLE1	CCUGCUCUGGUCUCAGGCCC	UCCACAUCAGAUGAUGACUC	AAACUUUAUGCCUUUGGAGA	9414033	4702517	1.50358	0.764652
ULA3	1216	O4	PRKCE	AAGGCCAUUGAACACUACCA	CUGGUCGCUGCGCCAUGCGG	GUCCACAUUGAGGGCAAUGU	7.41359e+06	3.6744e+06	1.18407	0.597476
ULA3	1216	B5	PRKCG	UUCUGGGGCCAUGGCUGGUC	UUUCUGCAAAACAGGGGCCG	AGAAGCGAGCGGUGAACUUG	8188197	3913765	1.30779	0.636397
ULA3	1216	C5	PRKCQ	CUGUCUGCCACGAGUUUGUC	GUGGACCUUUGCCUGCUUGA	AUGAAUGAAUUUGAGACGGA	6.60748e+06	3.51429e+06	1.05533	0.571441
ULA3	1216	D5	PRKDC	CGCAUUCCUGCCCCAGGCCG	GCAGCGGUCCGCAGCGGACA	CUCGGCGGCAUGGCGGGCUC	7.91322e+06	3.9666e+06	1.26388	0.644988
ULA3	1216	E5	PRMT3	GUUAGGCGGCCGGGGCGCUG	ACAGCGGGGACGAGGCCGCC	GAACCUGUUACAGAACAGGC	7044233	3797702	1.12508	0.617525
ULA3	1216	F5	PRPF19	GAGCAGCUCAUCGACAUCAA	GAGAAGUACAUUGCGGAGAA	GGGGAUACACAUGGGUGCUC	7.4594e+06	3.90575e+06	1.19139	0.635094
ULA3	1216	G5	PRPF8	CCAAGUAAACCCUUUUGUCA	AUGAUCUUCCUGACAUGUUC	AUGCAGAAAAGCGGAAGUUU	6.708e+06	2.79383e+06	1.07138	0.454291
ULA3	1216	H5	PSEN1	CACAACGACAGACGGAGCCU	CCAGGGUAACUCCCGGCAGG	CCCUGUGACUCUCUGCAUGG	6.5413e+06	3.6921e+06	1.04476	0.600353
ULA3	1216	I5	PSEN2	AUUCAUGGCCUCUGACAGCG	CGCGCUCCUGCCAGGAGGGC	GCUGGUGGGACCUACCCACU	8.41124e+06	4.26361e+06	1.34342	0.693283
ULA3	1216	J5	PSMA1	UUAUGGAUAUGAACUUUGAA	AGAGAUACAAGACGAGACAC	UUUUAGUAAUUUUAUGCGUC	1.25432e+07	12208687	2.00335	1.98519
ULA3	1216	K5	PSMA2	UAAUUAGGAUAACUACUAAC	GCCCCGUCCGUGGGAAUUAA	UCUGGACAAGUUUACCAGAC	13620381	13022264	2.1754	2.11748
ULA3	1216	L5	PSMA3	UGCAAAGAUGGUGUUGUCUU	UUUAAUGUUGAUCGGCAUGU	UCAGUUACUUCAAAAGAAAU	12289637	10162585	1.96286	1.65249
ULA3	1216	M5	PSMA4	UUGGGAAUUUUAGCAAAUGA	AGACUUCAUCAAGAAGCUUG	AUCUCACUUUCUCACAUAAG	1.22741e+07	12546416	1.96037	2.04011
ULA3	1216	N5	PSMA5	AUCACACUCACCAUGGCACC	GACCCAAGCUGUGUCCAAUC	UGCUCUUCUUCUAGAACCAC	12048394	1.16524e+07	1.92433	1.89473
ULA3	1216	O5	PSMA6	UGUUUAUUAGGACAAAUUAU	UGUGUGAUGACCGGAAUGAC	AAUUUGAAGAAAAUAACAAA	1.16305e+07	12297994	1.85758	1.99971
ULA3	1216	B6	PSMA7	GGCACCCACCUGCUUCAGAC	CCGGGUCCUCCACAGUCAGC	GAUGACUAUCCUUGCAUCGG	1.34651e+07	1.21446e+07	2.15061	1.97477
ULA3	1216	C6	PSMA8	UAGAAAUAUACCCAAAGCAA	AUUGUAGGUUUUGAUGAUGA	UGGUACUUAUCAUGCUUGGA	6.86275e+06	3.81062e+06	1.0961	0.619626
ULA3	1216	D6	PSMB1	UACUUACAAUUUGUAACAUU	CUGAUACUCGAUUGAGUGAA	UUUUUUCCUCAGUACUAUAC	1.19069e+07	1.16664e+07	1.90173	1.89701
ULA3	1216	E6	PSMB10	GCGCUCACCCAGGGCUGUGA	CUGACUGGACCGCAGCUCUA	GAGCAGGUACCAGGGCCACG	8246816	4.16693e+06	1.31716	0.677563
ULA3	1216	F6	PSMB11	ACCUGCCUCGGGCUGGCGGC	GGCCCACGGCACCACCACUC	ACACGCCACAUAGCUGCCAC	7.09927e+06	3.67292e+06	1.13387	0.597235
ULA3	1216	G6	PSMB2	CCGCUCCUACACCCCAGGCC	CAUCUGGACAAUAUUGCUGG	CGGGGCCUUGGAUACCGAUG	12143481	11236075	1.93952	1.82704
ULA3	1216	H6	PSMB3	AUGGGUGACCGGCUGUACAU	CCCUUGAAACUUACACUGUC	CCCGGCGUCUUGACCGGCCA	13233119	11666175	2.11355	1.89698
ULA3	1216	I6	PSMB4	GACUAAGAUGGAAGCGUUUU	CGGUAAAACUGUCCUGGGGC	CCUCUGUAAAGUGCAGACGC	8.61838e+06	6.04902e+06	1.3765	0.9836
ULA3	1216	J6	PSMB5	AUUUCGAUUCCUGGCUCUUC	AGACCAUCACUGAGACUCCC	CGUGUUGGAGAGACCGCUAC	1.12291e+07	9761034	1.79347	1.58719
ULA3	1216	K6	PSMB6	CGGCUACCUUACUAGCUGCU	GAAAGCCGAGAAGUUUCCAC	UGCACAAGGCCUGACGCGAU	1.11533e+07	11387476	1.78137	1.85166
ULA3	1216	L6	PSMB7	CCGAUUGGCUGUCACAACUC	CAGGUUGGAAGAAAUGAGCU	UUUUUCAGUUGUUGUGGUGC	1.49465e+07	1.25756e+07	2.3872	2.04485
ULA3	1216	M6	PSMB8	ACUAAUGUAGGACCCAGCUG	GAACUUGAAGGCGAGCGUGG	AGGGACUGGAAGAAUUCUGU	7.83649e+06	3936941	1.25162	0.640166
ULA3	1216	N6	PSMB9	CCCUCCUGACAGCGAGGCGG	GUAGAUGCGCUCGUGCAGCG	GUAGGCGGCCAUGUCGGCCA	6.42415e+06	3.70201e+06	1.02604	0.601965
ULA3	1216	O6	PSMC1	CUGUUUUUCAUAGGAAUCUG	AAACAGAGCAUACCUGUGCC	AAACAGAGCAUACCUGUGCC	12156953	1.20509e+07	1.94167	1.95954
ULA3	1216	B7	PSMC2	UGAUCGGCACCGAGGUAAUC	CAUGUCAACUGACCUCGGAU	AGGAGCUGGAUUCCCGCUCC	7.43108e+06	3610148	1.18687	0.587028
ULA3	1216	C7	PSMC3	CACCUUAGUCUGUGCGGCAC	CCAUACAUCAGCACCCCUUU	GUGGUUCAUUGGCAAGACAA	11177350	11229519	1.78521	1.82597
ULA3	1216	D7	PSMC4	CAGGAUGCGCACAUAAUAGU	GUGCUUGUGGAGGGCCACUG	AGCAUCAUGAUGCUCACCUC	1.38279e+07	12725153	2.20855	2.06917
ULA3	1216	E7	PSMC5	GGUGACACCCAAUUGCCGGG	AUGGGUCUACCUUGUUGGGC	UCAACUUAUGAGAUGAUUGG	1.27158e+07	1.1772e+07	2.03093	1.91419
ULA3	1216	F7	PSMC6	GGGGAUGCCGGGAAUGGCCA	CAAGAAGUUGCUUGAACACA	AGUCGAGGCACUUGAUUAAA	1.17142e+07	1.14506e+07	1.87095	1.86192
ULA3	1216	G7	PSMD1	GAGGUUUUAUACGAAGAUGA	AUCUAAAGUAUUUUAUCACC	CAAUGAUAACUCUGAAUAUG	11060137	9642096	1.76649	1.56785
ULA3	1216	H7	PSMD10	UUCGCCGACGUCGCCGACUG	CGGGAAGCUGGAAGAGUUGA	UUGCUGGGACAGCGAAAUGG	7.04028e+06	3.8839e+06	1.12445	0.631541
ULA3	1216	I7	PSMD11	UGAGAGCGGUAAGAUGGCGG	GUCGGUGCUGAGUAGAGACU	GGCGCGGCGACCUUUACCGA	13645477	11852963	2.17941	1.92735
ULA3	1216	J7	PSMD12	CAGCCGGCCUCUCCUCACCU	GGAGGUGGACUACAGCGCCA	CAGGCGGGGACCAUGGCGGA	16445813	1.32578e+07	2.62667	2.15578
ULA3	1216	K7	PSMD13	GCUGUCAUGAAGGACGUACC	GCCCGCUGUGUGGCACCGUC	CCCUCUAUCGCCGGGGCCCA	11567602	7.98976e+06	1.84754	1.29917
ULA3	1216	L7	PSMD14	UCUUUGUUUCAGGCCGGAGA	UGGUUGUUGGCUUUCUGGUG	CAUUCAGAGUGUAAAAGGAA	11899620	11548265	1.90057	1.8778
ULA3	1216	M7	PSMD2	GGAGGAGGGAGGCCGGGACA	GGCACGGACGAGAAGCCGAG	UGAGGCGCGACCCCGAGAGU	12685022	10599214	2.02601	1.72348
ULA3	1216	N7	PSMD3	GACCCCGGGUGCCAUGAAGC	AAGGCGAAACCGCCGCCCGG	AUCUCCACAUCCUGGGGGGC	9347738	5.27259e+06	1.49299	0.857349
ULA3	1216	O7	PSMD4	GUCAGCACUUCACAGUCACU	CACGCGGAUGCCCGUGCAGA	GACCUCAGAGCAGGGAGGAA	11715029	6.09301e+06	1.87109	0.990754
ULA3	1216	B8	PSMD5	GCAGGGAGAAGAGCGGGCCG	CGCGCUUCACUCCGUGCUGC	GGGGGGCAAGAUGGCAGCCC	7.51708e+06	3579336	1.2006	0.582017
ULA3	1216	C8	PSMD6	UCGCGAUGCAAUGAUGGCAA	UGAGUUGAAGCGUUUGGAUG	CCAGUCGAGGGAUUUGCACA	1.14536e+07	1.15599e+07	1.82933	1.87969
ULA3	1216	D8	PSMD7	UCAUUCAGAAUCGGCAAGGU	GAUGUAUCGAACAGUUUUGC	ACAAAGGUUUAUAUUUUUAA	11640468	10764040	1.85918	1.75029
ULA3	1216	E8	PSMD8	CUGACAUGUUCAUUAAGGGC	GUAGCCCCGCCCCGGGCCUU	AGGCGGCGCUGCCGUAAAUC	7176094	3.67613e+06	1.14614	0.597757
ULA3	1216	F8	PSMD9	GGGGUUCACGAUGUCCGACG	CGUGACUGUCAGCGACGUCC	GCUUUCCAGCACGUCAUAGU	6557462	3.45253e+06	1.04734	0.561399
ULA3	1216	G8	PSME1	CCUCUUCCCAGGUCACCACC	CAAUUUUGGAGUGGCUGUCC	AGCUCAAACACCUUCUCCUA	8383938	4189544	1.33906	0.68124
ULA3	1216	H8	PSME2	AUCCAGUUGUUAGCUAGAGA	UCACUUGCAAGAGCUGAUUC	GCAAUGUAACCCACAGGCUG	7.12274e+06	3.68253e+06	1.13762	0.598797
ULA3	1216	I8	PSME3	UUGCUUUUCAGCAUCCCAUU	UACAUUUCUCAAUCAACAGC	ACCUGAAGUGCAAAAAACAG	7652462	3.77685e+06	1.22223	0.614134
ULA3	1216	J8	PSME4	GAUCUGGGCCAGCUGCAAGU	UCUGCGGGACGAAGCCCCGC	GCUCAUGGAGCCGGCCGAGC	9.55751e+06	4.71837e+06	1.52649	0.76723
ULA3	1216	K8	PSMF1	CACACCUAUCCAUGAGCAGU	CGGUAGCAGGGGGGAACUCC	CGACUGGUGUGUGGGUGGUG	7.83433e+06	4468720	1.25127	0.726636
ULA3	1216	L8	PSMG2	GCAGUAUCUGUUGGAAAUGU	AACCAUUGGCACAAGACAAU	GAACUUAGCAUAAAUGCUGA	7.08887e+06	3.97173e+06	1.13221	0.645823
ULA3	1216	M8	PTEN	AUGUGCAUAUUUAUUACAUC	AUAACUUACCUUUUUGUCUC	UUUAUUGGAAAACAGAUUUU	6.74727e+06	3.44554e+06	1.07765	0.560262
ULA3	1216	N8	PTK2	CCACCUGGGCCAGUAUUAUC	AAUACUCGCUCCAUUGCACC	UUUGGUGUGUGAUUCAAGUU	7152165	3.6778e+06	1.14232	0.598028
ULA3	1216	O8	PTK2B	GCCCCUGAGUCGAGUAAAGU	GGUGGUGGUACCAGUAGAUG	UCCUGGGAAAAACUUCAAAC	6.98103e+06	3.40936e+06	1.11499	0.554378
ULA3	1216	B9	PTPN22	AUACCUGCAGUGAAUGCAUA	ACCCUAUUCUUGAGCUCAUC	ACCAGUUUCAUUACAAGAAU	6193020	3.20285e+06	0.989129	0.520798
ULA3	1216	C9	PTTG1	UCAGCAAUCAAAGCCUUAGA	UAGCUUUAGGUAAGGCUGGU	AGAAAAGUCUGUAAAGACCA	7.16741e+06	3.42353e+06	1.14476	0.556682
ULA3	1216	D9	PTTG1IP	GCGCCCUCACCAGCUCCGGG	GGAGCAGCGCGGCGCCACCG	GACCGGCCGACCAUGGCGCC	7.78438e+06	4.31359e+06	1.2433	0.701411
ULA3	1216	E9	PYHIN1	AAGAAAAUUGUUCUACUGAA	UCAUACUCUUCUUUCAUUUU	UUGCCCAAACCGGCAUCACC	7.45624e+06	3.89018e+06	1.19089	0.632563
ULA3	1216	F9	RAB1A	UUGUGUUACAGUGACCAAGU	CAUACACAACUAUGAUGCCA	UUGUAAUAGUGGGACACAGC	6.97725e+06	3.80065e+06	1.11438	0.618004
ULA3	1216	G9	RAB40A	UCCCCCCGAGAUGGCUGUAC	UCCCCCCGAGAUGGCUGUAC	UCCCCCCGAGAUGGCUGUAC	6.5889e+06	3.45844e+06	1.05236	0.56236
ULA3	1216	H9	RAB40AL	CAGGUGACUGUACGGGGACU	CAGGUGACUGUACGGGGACU	CAGGUGACUGUACGGGGACU	6.67396e+06	3.5317e+06	1.06594	0.574271
ULA3	1216	I9	RAB40B	GCGGAGGGCGUGCCGGGGUG	GGCGAGCCUGCAGGAUGGCG	GCGCCCUGGGCAGCCCGGUC	7.91374e+06	3.9625e+06	1.26396	0.644321
ULA3	1216	J9	RAB40C	AACCAAGAUCCGGGGGACUC	ACGCGCGGGCCUGCUCCGUC	GAUGCGGGAUAGCUCCGUGA	6.55914e+06	3.43803e+06	1.0476	0.559041
ULA3	1216	K9	RABGEF1	GCAUCCUUUCGGCCACAUUG	GAGAUUGCGGGUAUUGCACA	GAGAUUGCGGGUAUUGCACA	8170450	3.67316e+06	1.30496	0.597274
ULA3	1216	L9	RACK1	GAGGGCAAACUGGCCAUCUG	GAAUUCCACAGCGUGCUCUG	UAGAUAAGACCAUCAUCAUG	6.38885e+06	3.06728e+06	1.02041	0.498754
ULA3	1216	M9	RAD18	UGAAACAAGUUACUAAAGGU	GAUCGCUCCAGAUCCCUCAG	GCAGGGCUCGCCUCUUUUUG	6.97044e+06	3705184	1.1133	0.602481
ULA3	1216	N9	RAD23A	GUUGCAGACCAAAGCCGGCC	GAGGACUCUGGGGCAGCUGU	CUCUGGCGGCAGGUGGGGGA	7.69107e+06	3.70982e+06	1.22839	0.603235
ULA3	1216	O9	RAD23B	UUCCUCCACCACCACAACUG	GAUGGAUGCAGGUGUGGAAG	UCUUGUUUAGCUGCACUAGC	9074333	3.49966e+06	1.44932	0.569062
ULA3	1216	B10	RAG1	CGACAUCUCUGCCGCAUCUG	CCUGUGGAUGGUAAAACCCU	GGUUUUCCGGAUCGAUGUGA	7.15705e+06	3.091e+06	1.1431	0.502611
ULA3	1216	C10	RAG2	GAAGCCUACAAUUUUCUCUA	UCCAGUGGGGCAGGAUCUUU	AACAUAGCCUUAAUUCAGCC	6.66617e+06	3.58676e+06	1.0647	0.583225
ULA3	1216	D10	RAPSN	CUGCCUGGUCACAGCCCACU	GGCAUUGCAGGUGUGGACAA	UCUCGAUCUGCUGCUUGGUC	7374920	3.83917e+06	1.1779	0.624267
ULA3	1216	E10	RASD2	CAUGCGGUAUGAGUUUUUGG	CUUCCUCAAUGGCCGCUUUG	CGUAAGGUAUACAACAUCCG	6.76533e+06	3685492	1.08054	0.599279
ULA3	1216	F10	RASSF1	UGGGCAGGUAAAAGGAAGUG	CGCCGGGCAUCCUGCAAGGA	CUAUUUCUUUAGAACAAGGA	7827631	4.03285e+06	1.2502	0.655762
ULA3	1216	G10	RASSF5	CCCCGCUGGCAGAGUGAAGA	GAAACUCCGGCGGCCUGUGA	CGCCAGGUUCACCUCCUUGA	8.03888e+06	3.9571e+06	1.28394	0.643443
ULA3	1216	H10	RBBP6	GGUAUCAUAGUUGAGUUUAG	CGACUUAAAGAAGCAGAUUA	ACCAAUGCGCAGACGAAAGA	8.6007e+06	5.65942e+06	1.37368	0.920249
ULA3	1216	I10	RBCK1	UUGCCCCCACCAGGUUUUUC	GUGGGUGAUUGGGCAGCGGC	CCCCAUUCUGCCGCACCCCA	6.72108e+06	3.32268e+06	1.07347	0.540284
ULA3	1216	J10	RBX1	UUCCAAAAUGGCGGCAGCGA	GAAGCGCUUUGAAGUGAAAA	CUCCGCGCCUCGACCAUCCU	10360368	7.28229e+06	1.65473	1.18414
ULA3	1216	K10	RC3H1	CAAAUGGGCAAGCCUUGCGG	AAGCCCAUCAGUUUGGGUUG	UGUACAAGCUCCACAAUGGA	7.42362e+06	3.89378e+06	1.18568	0.633147
ULA3	1216	L10	RC3H2	UUGAUGGCAGUCUGGUCAAA	GUGUGAACAACCUAAACUGA	UGCCUGUGCAGGCAGCUCAA	7.5282e+06	3.7154e+06	1.20238	0.604143
ULA3	1216	M10	RCE1	GGCGCAAUGGCGGCGCUGGG	GACACCCAGCAGCACAGCCC	GACGUAGAGGCUGCCCACGU	9356113	4.95638e+06	1.49433	0.805931
ULA3	1216	N10	RCHY1	CAACCUGACGGAAGCUUGUC	GGCUGCGAGCACUAUGACAG	AGGAGAUGGCGGCGACGGCC	7618585	4.11026e+06	1.21682	0.668348
ULA3	1216	O10	RFFL	CAGCUUGGUUCCAAGCCUGU	GGCCUGCAUCCUGGCUCCCU	CAGGCAGAACCAGUUGCAGC	8313110	3.55348e+06	1.32774	0.577813
ULA3	1216	B11	RFPL1	CUCUAGAUAGUCUGAGCAGA	AGAACAAAAUCAGGCCCAGU	AGAACAAAAUCAGGCCCAGU	6.84424e+06	3146452	1.09314	0.511628
ULA3	1216	C11	RFPL2	CCAGAAUUGUCUCUCACCUC	UGCUGUAUUGUGUGGCCACU	CCGAUGGAGGUGGCUGAAUU	6.8739e+06	3.51635e+06	1.09788	0.571776
ULA3	1216	D11	RFPL3	GCAGCGAAUUGAUGCACUUG	GGAACAAAAUCAGGCCCAAU	GGAACAAAAUCAGGCCCAAU	6.42891e+06	3.31792e+06	1.0268	0.53951
ULA3	1216	E11	RFPL4B	GGCACAUCGCUCUAAAAUCA	AAGUCGGCUAUUGUGCUGCU	UCACAUCCUCCCGAAAAUGC	6.75542e+06	3.70913e+06	1.07895	0.603122
ULA3	1216	F11	RFWD2	CCCGAGGCCGCCCGAGCCGG	ACCGCCACGGAAGGCGGCGA	AGGCCGGGUCGGGCUCCGCU	7.59191e+06	3.48383e+06	1.21256	0.566487
ULA3	1216	G11	RFWD3	UGGCUGCUGAUCACCUCAGC	GCUGAUGUGGUCAGCAGCCA	AGCAAUGGAAUAUGAUGUUC	6943513	3707929	1.10899	0.602927
ULA3	1216	H11	RHOA	CUAUGUGGCAGAUAUCGAGG	GAGCAAGCAUGUCUUUCCAC	UUUCAGCAAUGGCUGCCAUC	7.36723e+06	3.72826e+06	1.17667	0.606233
ULA3	1216	I11	RHOT1	GGUUGGGAACAAAUCUGAUC	UACAGAAAUAGAAACCUGUG	UAAAUUCGGGUUUUAAAUAG	6864349	3680503	1.09635	0.598468
ULA3	1216	J11	RING1	GGACACCAGCUUCUUUCGGC	UCUCUAAGAUCUAUCCUAGC	GCUGGUUGUGCAGGCGGCUC	7.34433e+06	3.65326e+06	1.17301	0.594038
ULA3	1216	K11	RIPK1	AUGACAUUCAAGGACAUGUC	AACUGGACAGCGGAGGCUUU	UUUCAUGAUCAUGAGUCCCU	6.31877e+06	3.54968e+06	1.00921	0.577195
ULA3	1216	L11	RIPK2	GCCCGGGACCAUGAACGGGG	GCGGCUCAGGUAGCGCAGGU	GUGGAUGUGCAGGUGCUUCA	7.35306e+06	3.576e+06	1.17441	0.581475
ULA3	1216	M11	RLIM	GUCACCUAUGAAAGUGAACG	CAAGUAAGAAGAGUUCGUCC	AGUGGUGAAUCUACAGGAUC	6.6928e+06	3.40551e+06	1.06895	0.553752
ULA3	1216	N11	RMND5A	UGAUUCUGACAUUAGCAGUG	UCACCUCAUUGAGAAGCCUU	UGUGGCUGAGGAGCUCUGUC	7.14829e+06	3.41752e+06	1.1417	0.555706
ULA3	1216	O11	RMND5B	CAUGGAGCAGUGUGCGUGCG	CCUACGGGCAGCACUGUGAG	GGGUGGCCACCCACCUGCGC	6625225	3188930	1.05816	0.518536
ULA3	1216	B12	RNF10	GCGGCGUUGGGGGAGCUCAG	CAACAGCUCCUCCGCCUCUU	UCCGCCUCGGCGGGGCCAGC	7.43304e+06	3.45386e+06	1.18718	0.561615
ULA3	1216	C12	RNF103	CAACCCCCGGCACUCCAAAA	UGCCACCCAGCUGGUGGAUC	CGAACAGGACCAGGAAAUAG	7.2963e+06	3487307	1.16534	0.567053
ULA3	1216	D12	RNF11	CACCCCAGCUCCGGAAGAUG	ACCGGGCUAGCUUUGGCGAG	ACACCCUCCCCUACCUGAUA	6.63075e+06	3515456	1.05904	0.57163
ULA3	1216	E12	RNF111	UAAAGUUUCCCAUGUCUCAA	ACUCUUCAUAUCCACUUUUA	GCAGCCAAAAGUUUUCCUGC	7.11441e+06	3.94027e+06	1.13629	0.640707
ULA3	1216	F12	RNF112	CCUAGCUCCAACUUGGGGAA	GGCCACAGUCCAGCGAGAUG	GCGGCUCACAGCCCGGGAGA	7.10432e+06	3.52192e+06	1.13468	0.572681
ULA3	1216	G12	RNF113A	UGGGUCACCCGCUUCUUUUC	CUGCCGCUUUCUCCGGGCUC	ACCUGAUCCACCGCCUUUCC	5.48441e+06	2.56466e+06	0.875953	0.417026
ULA3	1216	H12	RNF113B	ACACAGUGGCUCAGCCCCCG	CCGGCCUGCGACCCCGAGCA	GCAUACCUGGUCUGCUUGGU	7.40155e+06	3.67612e+06	1.18215	0.597755
ULA3	1216	I12	RNF114	CAAGAUGGCGGCGCAACAGC	AGGGGGUCAGCCUCCGCCGC	AAGCCGGUACAGGUGCCCUG	6944987	3.60527e+06	1.10923	0.586235
ULA3	1216	J12	RNF115	AGACCUCCACGGUUGCCAUU	GCUCUAUUAUCUUGGUCCAG	UUACUAGCUUUGGGGCCAUU	7.05098e+06	3.51288e+06	1.12616	0.571211
ULA3	1216	K12	RNF121	CGCAUGCAUGCCAAGCACCG	CCUCAUCGCAACCUUGGUGG	GGCUUACAUUGUAGGAGCGU	6.82569e+06	4.01194e+06	1.09018	0.652362
ULA3	1216	L12	RNF122	UCUUCUGCUGCUAUUUUAUC	CCAUAUAGAUGUUGAGCGGA	CCCUUUGCAGGGUGUUUCUG	6.834e+06	3.59238e+06	1.0915	0.584139
ULA3	1216	M12	RNF123	CCCCAGGAACGGUGUAUCAC	CUGGGAAGUAGGCCAUACCC	AGGACGGCUGCCAAAGUUGA	7.75118e+06	3.72794e+06	1.23799	0.60618
ULA3	1216	N12	RNF125	UCCGUGCUGAGCACCGACAG	AGGACGUGACGGGCAACUCC	CAGCCUGUCCGGACCCGCUG	6.70861e+06	3.45543e+06	1.07148	0.56187
ULA3	1216	O12	RNF126	GCCCCCUCACCCUUCCAGCG	UCGGGCGCCGUACCGGUGCC	UCGUCAGCCUGCGCCCCAGG	6.85647e+06	3.3696e+06	1.09509	0.547913
ULA3	1216	B13	RNF128	GACAUUGUUGCAAUCAUGAU	AAGAGGCAUACAAGUGACAA	UGCCGCCGUAAUAAUAAAAA	6.64874e+06	3.34488e+06	1.06191	0.543893
ULA3	1216	C13	RNF13	GUUUUAAAUGCACAGAGAGC	CGUUGGAUCCCAUGCUAAUG	AUUUGUAACUAAAAAUUAAC	6821280	3.52156e+06	1.08947	0.572623
ULA3	1216	D13	RNF130	CGGUCGAUGCGAAACGUGAG	CUCGCGUUGUCUGCCCGUGC	CGGAGGGACGAUGAGCUGCG	6.69704e+06	3613949	1.06963	0.587646
ULA3	1216	E13	RNF133	GGAGUUAUAGUGCCACCAGA	GAAUCAUGUGUUGUCAGAGU	GUUGCAGAGCAAGUGUUGUU	7.18758e+06	3.58517e+06	1.14798	0.582966
ULA3	1216	F13	RNF135	CUCGGCUGCAUCAUCUGCCA	CCACUGCCUGGAGGCCCUGU	GCCCUGGCGGCAAGUGGGGC	8.41414e+06	3.91059e+06	1.34388	0.635881
ULA3	1216	G13	RNF138	CGUGGCCGCAGAGAGGUCCU	CAAAACGCCCGUGCGGACCA	AACCCGGCUCCGCGAGGGGG	8.82997e+06	3.90006e+06	1.41029	0.634169
ULA3	1216	H13	RNF139	AUCGUUCUACAGCUAACAUU	GAUCUCUUGGUUCCUGUAAU	UGUAUUUAAUGUGAGAAUCA	6890836	3.33972e+06	1.10058	0.543054
ULA3	1216	I13	RNF14	AAUGAGUGUCUCCAGAAUAG	GAAGAGGAUGGAUAAUCUGG	GUUUCAAGUCUAACCUGAGU	8.76798e+06	3.94143e+06	1.40039	0.640895
ULA3	1216	J13	RNF141	GCUGAGCUUAAUGAUGUGUA	AGUAGCAAAACAUGUUACGU	CAUCAUGGGACAGCAAAUUU	6.34367e+06	3.34634e+06	1.01319	0.544131
ULA3	1216	K13	RNF144A	CAACAAGGUACCGGCCCACC	CUGUCUUGGGGAGUACCCAG	CCAGAGUACAGAAGAUGCAU	8037538	3.84501e+06	1.28373	0.625218
ULA3	1216	L13	RNF144B	UUACACUUUAGAAGUUCAUC	CCUGGGUCACUCGAGGCAAC	GAAAUUCUGCUCGUGUUGCA	6623556	3.63273e+06	1.05789	0.5907
ULA3	1216	M13	RNF145	AAUACUUAUACUGGAAAAGA	GUUGGAUGUCCUGUACAGAU	CAUGGCUGCAAAGGAGAAAC	6.90205e+06	3.53638e+06	1.10237	0.575033
ULA3	1216	N13	RNF146	UAGCAGAAAACGUGCUUACA	UUGUCGACAAGAAAUUCCCG	GAACUCAAGGCAGCAAGUAG	6491835	3.22037e+06	1.03686	0.523648
ULA3	1216	O13	RNF148	GGGGAGAAUGCACAUGCAGU	GCAAAAUUUCCAUGCCUUUC	UCCCAUGUCUCACCAGGGGA	6.47008e+06	3.33161e+06	1.03338	0.541737
ULA3	1216	B14	RNF149	CCGAGACGCUCCACACCGUC	UCUCGAGUGGUUCUCGGCCG	CACGCCGCGAGCCCCGACGC	7.02026e+06	3.29315e+06	1.12125	0.535482
ULA3	1216	C14	RNF150	AUGCGAGGGAAAUGAUCAUC	CUGCAAGUUCCGGGUUCCGA	AUCUCCUUCCCUUUUGGCUC	6.8304e+06	3.37252e+06	1.09093	0.548388
ULA3	1216	D14	RNF151	ACCUGGCCUUUGCAGGGUGG	UCGUGUGCUCCGUCUGCCAU	UGCACUUUUUGCAGAAGAUG	8.19171e+06	3.585e+06	1.30835	0.582939
ULA3	1216	E14	RNF152	GAGGCAGCUUGGUGACACCG	CAGUGUGCCUGCAGCAGAUG	GCUGUCCCAGGACUCUCUGC	7.40095e+06	3.84802e+06	1.18206	0.625706
ULA3	1216	F14	RNF157	UUCCGUGGCCUGGUAAUAGA	GUAGUGGACUUUAGCUUUAC	CUGGUUUUCUAGAUGUGCUG	6.96877e+06	3.49493e+06	1.11303	0.568293
ULA3	1216	G14	RNF165	AUGCUGAGACCUUUGAAAGG	GGGGUGGGCCAGCGGGAAGU	GCGCCGCUGUGCUGGUGGGC	7.80457e+06	3.86061e+06	1.24652	0.627754
ULA3	1216	H14	RNF166	CGUGUGGCCGCAGCUGCCGA	GGCAGGUGUACUGCGCCUCC	GGCUCAGCAGCGGCAGCCGC	7533453	3.64797e+06	1.20322	0.593177
ULA3	1216	I14	RNF167	CAUCCUUCAGGGGUUCCUUG	CACCCCCAGCCCCGGUCAAU	CGACUGCAACUUUGACCUCA	8363604	3.86689e+06	1.33581	0.628775
ULA3	1216	J14	RNF168	GAGUCCACGACGAUACCCGG	UCGACGGUCGACUGGAAGCA	GCACUCGGACAGCGAGGGGA	7.43958e+06	3.52049e+06	1.18823	0.572449
ULA3	1216	K14	RNF169	GCAGCCGCUCUGAGUCGGCG	ACAGCGAAGGUCCAGAAGCC	CGGAGGAAUCGGGCUGCGCC	7687324	4.06878e+06	1.22779	0.661604
ULA3	1216	L14	RNF17	AGAGACAGCGAUGGCGGCAG	GACUCUUCCUCCCCAUUCGC	GGAUACCCUCCUUCCACACC	8.64361e+06	4.33957e+06	1.38053	0.705635
ULA3	1216	M14	RNF170	CCUGAAAAGUGCAUAUACCA	AGUAAGCGACCAAGUACUUG	UUGAACUUCACCUUGAUAUU	7.31799e+06	3.3667e+06	1.16881	0.547443
ULA3	1216	N14	RNF175	ACGGGGAUGACUCACAUUGU	GGUCAUUGCCCAGAUAGUGC	GGGCCACGAUUCCAUGCACG	7.3759e+06	3.58241e+06	1.17805	0.582517
ULA3	1216	O14	RNF180	ACUGAAUUGUCCUUUCUGUG	CUGUACAUCUCUCCAAGAGC	UGUGACAAGUAUUUCACUGA	6987069	3.19148e+06	1.11595	0.518951
ULA3	1216	B15	RNF181	GCAGUCGUGUUCAUCGAAAU	ACAUGCUGCUGGAGCUCGCA	CAACCAGCAGGUUUCUGGGC	7253337	3.57917e+06	1.15848	0.581991
ULA3	1216	C15	RNF182	AGUGUCUUCAGGAGGUUGAC	AUCGAUACAAUCUGAAACAG	CAAAGUCUAUGAUCUUGUAG	7.05711e+06	3.80068e+06	1.12714	0.61801
ULA3	1216	D15	RNF183	CAUGCUCGCCCUGCUCCGCC	CUGUGGGCUGGCGACAGAGU	GGCCAGACAUUCCACGCAGA	9631106	4.51493e+06	1.53825	0.73415
ULA3	1216	E15	RNF185	CAGCCAAGGAUGGCAAGCAA	AAUGGCGCUGGCGAGAGCGG	CAGGCUGAUGACGGCAUCCU	7243959	4.12939e+06	1.15698	0.671458
ULA3	1216	F15	RNF186	GGCCAGCAGCUUGGGCAACC	AGCAGGGGCCACAGCGGUGG	CUGUUGCAGGGUCUUGGUGC	7.21196e+06	3.8362e+06	1.15187	0.623785
ULA3	1216	G15	RNF187	GGGGCCCGCAGGGAGCGCCA	UCGGCGCGCACCGGUUCCCG	GCUUCUGGGCCGAGGAGGAC	7366394	3.8265e+06	1.17654	0.622208
ULA3	1216	H15	RNF19A	AAGGGAGCUAAAUGGCGGGG	AAAAAAAGAAGAAUUUCAAU	AUGAGUUUACAUCGGCAAAU	6.92376e+06	3.46198e+06	1.10584	0.562935
ULA3	1216	I15	RNF19B	CCGCGCCCGGGCCAAGCCGC	CCGCUGCGGCACUUAGGGUC	GCCGGCCAUGGGCUCCGAGA	7.99055e+06	3.41129e+06	1.27622	0.554693
ULA3	1216	J15	RNF2	AAUUCACUGUGUAGACUUCG	AUCAUCACAGCCCUUAGAAG	AUCAUCACAGCCCUUAGAAG	6.99841e+06	3252577	1.11776	0.528885
ULA3	1216	K15	RNF20	GCAAACCAAAAAUCGCAAGC	CUCACGAAGUUCAUCUUCAA	UAUUGAUUGUCAACCGAUAC	6.46179e+06	3.35546e+06	1.03206	0.545613
ULA3	1216	L15	RNF207	GCUAUCUUCGGGCCCCUGGA	UCGUACUGCACGUGGCACAG	CGGGCAGGUGAGGCGGCCGU	7.29243e+06	3.82144e+06	1.16472	0.621384
ULA3	1216	M15	RNF208	AGGGGGCAGCCGGUAGCUCA	GGAUGACAUGGGGACCCUUC	GCCUCGGGCCCGGGGUCAGA	7.28014e+06	3.81028e+06	1.16276	0.61957
ULA3	1216	N15	RNF213	UCAGAGCAGCCCGCAAUUCC	ACCGGUCCCCCCACCUCUGC	CUCAGGCAACAGGAGCUCCU	7100277	3269354	1.13403	0.531613
ULA3	1216	O15	RNF214	GAGCAUAAUGGCAGCGUCUG	ACUAGAAGAUUCCGGAGGAC	ACACAUUACCUUAGACCAUC	6.81546e+06	3.21792e+06	1.08854	0.52325
ULA3	1216	B16	RNF215	UAGACAUCCCCUGCACCUGC	CUUAUUCUCCUGGUGGAACU	CAUCGUGGAUGCCGAGCAGG	6.94844e+06	3.28379e+06	1.10978	0.53396
ULA3	1216	C16	RNF216	UAACCAGCAGUCUUCUUCGA	UCUCUGAGUCUUCGGAUGAC	AGAGCAGAAAGUCAUCAUCU	6.49401e+06	3.53494e+06	1.0372	0.574799
ULA3	1216	D16	RNF217	GCCGCGGGCGGCGAUGGGCG	GCCCCAGGAGUCGCAGACCC	GCCUCAGGGGGACAGCGCCC	9098470	4373270	1.45318	0.711115
ULA3	1216	E16	RNF219	GAUGUGGUGUCAAAGAAUCA	AGAAAGUGCUGUCUGGCAAA	ACGAAGUGAUAAGUAUAUAG	6.32958e+06	3.47882e+06	1.01094	0.565673
ULA3	1216	F16	RNF220	AGACUCCGAUGGACUUACAC	AUCACGGCUGGCCUCAGCCG	ACGUCCUUGUCAACUGAGAC	6601995	3.12892e+06	1.05445	0.508777
ULA3	1216	G16	RNF222	GCGGCAGAUGGGGCAGACCA	GGUACUUGACCAGGCAGUCA	CGGAACUUCUCAUAGCACAC	7.184e+06	3.79955e+06	1.14741	0.617826
ULA3	1216	H16	RNF24	UCUUCUGUUGCUACUUGAUU	AACAUAUAUAUUGUGGUUUU	AUUUCCCACAUUACAACUUC	6.55737e+06	3.63368e+06	1.04732	0.590854
ULA3	1216	I16	RNF25	ACCGAGCAAGGCAGUGGCAG	GCCUUCCCUCUAGGAGAAGG	UGCCUCUAUGGUUUCCAGGU	7.8309e+06	3.54458e+06	1.25073	0.576366
ULA3	1216	J16	RNF26	CUGACUAGUCUUCUGCACUU	CCGGACCACGGCUUCGAUCA	CUGCUGUAUAGCUGCUGCUC	6.98887e+06	3.48445e+06	1.11624	0.566589
ULA3	1216	K16	RNF31	CAGGAUGCCGGGGGAGGAAG	CCUGAGGAGGGAUUCCGGGC	UGCAGGUAGCGGGCGGCUAG	1.03037e+07	4.14998e+06	1.64567	0.674806
ULA3	1216	L16	RNF32	AUCUCUAAAAAGAGAUACAA	UUUUCUGAGUCUUCUAGUUU	GUCAGCUUACCCAAAGUCAA	6989405	3.69817e+06	1.11633	0.60134
ULA3	1216	M16	RNF34	CUAUGUGGGCUUCGUGCUGU	GGCCAGCAGUCAGCAUUUGC	UAGGUGGAAAACUCAGGGUU	6.67032e+06	3.1274e+06	1.06536	0.508531
ULA3	1216	N16	RNF38	AGCAGACGGGGAGAUACAUU	GCUGCUGUGCGUAAGGGAGA	CCUCUCUGGCGCCUGACAGG	6.95251e+06	3322749	1.11043	0.540295
ULA3	1216	O16	RNF39	CCUUCGAGCGCGCAGAUGGC	GAAAGCGGCAAAAGUUAAUG	AUUUGACGAGACUGAGACUC	6862851	3160523	1.09611	0.513916
ULA3	1216	B17	RNF4	CCUUAGAAAGAAGAAGACCA	UGUGGUGAGCAGUGACGAUG	CCUGGCGUUUCUGGGAGUAU	6.70887e+06	3.01332e+06	1.07152	0.48998
ULA3	1216	C17	RNF40	GCCGCGGCCAUGUCUGGGCC	GGAAAAGAAGCUGAGUCGUG	GAGAUGCCUCCAAGACGAAU	6.67552e+06	3248152	1.06619	0.528165
ULA3	1216	D17	RNF41	GGCCUACCUGCUCCGCCAGC	GCAGACACGCAUCGCAGAGC	GCUCAUCUUUGGGCAUCUCC	6.77992e+06	3.2111e+06	1.08287	0.52214
ULA3	1216	E17	RNF43	UCUAGUGUGCUUACCCAGGC	UAAUGACGCUGAGAAGCUGA	UGUAGCUGCAGCAGCCGCUG	7263823	3.78833e+06	1.16015	0.616002
ULA3	1216	F17	RNF44	CUUCCUACCUUCCCCAGAGC	UCGCCGCUGGCCCACGGGGG	UGCCCCCCCGAUGCGACCAU	7.22601e+06	3.78193e+06	1.15412	0.614961
ULA3	1216	G17	RNF5	GGCUGGAGACACGGCCAGAA	GUCUCUCACCUGGGAUCCUG	UCUUCCACACCGUUUUCCAA	8.40563e+06	3.98478e+06	1.34252	0.647945
ULA3	1216	H17	RNF6	UGAAGGAUCUUUCUCAACAU	GUAGUAGUUCCAACAUUCCA	ACAGAGAUCAUACUGCAAAU	6821547	3.34388e+06	1.08952	0.543731
ULA3	1216	I17	RNF7	CGGAGAGGAAACCUGCGCCC	CUCCCUCAAGAAGUGGAACG	CGAUACGUGCGCCAUCUGCA	6.84569e+06	3.33686e+06	1.09337	0.54259
ULA3	1216	J17	RNF8	UCCCAGGUGACUGUAGGACG	GGUUUCGAGAAAUCAUCAGG	UGUUGUCCAUAAUUGUCCAU	7.5811e+06	3.52519e+06	1.21083	0.573212
ULA3	1216	K17	RNFT1	CCACACAAGAUUGACAGGAG	CUGCACAGUCCUCCAGGAAC	GGCCUGAAGCAAAGACAUCU	7.38925e+06	3.72879e+06	1.18019	0.606319
ULA3	1216	L17	RNFT2	UCAUCCAGAUGCCCGCGUCC	UCCACCAUGGCGGCCACCGC	CUCCCUCCUCCGAGUGCCCC	7.22246e+06	3.60093e+06	1.15355	0.585529
ULA3	1216	M17	RPL11	UCCCUGUUGCAGCAGGAUCA	UCUGUCUCAACAUCUGUGUU	UACUCACCUUUGGAAAACAC	6.41072e+06	1.65687e+06	1.0239	0.269415
ULA3	1216	N17	RPL23	AAAAGCACUCAAUGGGCCUG	UUGUGCUGACAACACAGGUG	UUAUAUCCACAGGACGUGGU	8.54507e+06	1.82557e+06	1.36479	0.296846
ULA3	1216	O17	RPL5	AUACCCUGCGGGCCAGCAGC	UUCUGCAAGAUGUUUGUACA	UUCUGCAAGAUGUUUGUACA	7.34159e+06	1527829	1.17258	0.248432
ULA3	1216	B18	RPS27A	GGCCCGUACCUCGAGGGUGA	CGGAAUCAUGGUCUAAGACA	CGGAAUCAUGGUCUAAGACA	8761031	2.16358e+06	1.39928	0.351809
ULA3	1216	C18	RPS3	UUGGAUUAGUUUGUCGCUGA	GUCAAAUGAGUUUUACCUGG	GUCAAAUGAGUUUUACCUGG	8.55396e+06	2.49153e+06	1.36621	0.405136
ULA3	1216	D18	RPS7	CCCUCUCACCUGGGAGAUGC	GGAGGCGGCCGCGCGUGUGU	CGUUGCUUCUUAGGCUCUUC	8.708e+06	3.93841e+06	1.39081	0.640404
ULA3	1216	E18	RRAGA	GCUGAUGGGGAAGAGCGGGU	AUUACAUUGCUCGCGACACC	GGUUCCCUAGGAAUCGGACG	8760294	4.65667e+06	1.39917	0.757197
ULA3	1216	F18	RSPRY1	ACUACCUAAAUGAUCGUCUU	CGAGAGUCAACAACAGACCC	GGAAUUACCCAUGGUAGUAG	6.47392e+06	3.0516e+06	1.03399	0.496205
ULA3	1216	G18	RTF1	CCUUUGUGUGGGUCGAGCAG	GGGCAAGAGGGGAGUCCGGG	CGUGAUCGACUCGGACACAG	11886946	6.25782e+06	1.89854	1.01755
ULA3	1216	H18	RUSC1	UCAGCCGGCUAUCACCCAAC	GUCCGCCACCAGGGCGUGGA	ACGCCUCCACCACGCUCCAG	6.87856e+06	3536363	1.09862	0.57503
ULA3	1216	I18	RUVBL1	AGAUGUGACCUUGCAUGACU	AGUAUGUCCCCUUGCCAAAA	UCUUUUUGCAGAGGCAGGGC	7.32191e+06	3.5094e+06	1.16943	0.570646
ULA3	1216	J18	RYBP	GAUCUUCAAGUACCUGGUGG	GGCUUCAGCACUGUUUCUGA	GCAGGUUUCGCUUGUCUUUU	6.66235e+06	3.33614e+06	1.06409	0.542473
ULA3	1216	K18	SAE1	GGCUGGCGGCGGCAUUAGCG	UCUGGGCCUCCAGUCCCCAC	UGGAGGGGGCGUCUAUUCUG	9.67924e+06	5.04892e+06	1.54594	0.820979
ULA3	1216	L18	SART3	AGAGUUUGAAAGUGCGAUUG	ACACGGAGCGAACUUUCUCA	CCUAACAUUUGGCUAGAGUA	6.25084e+06	3.1373e+06	0.998364	0.510141
ULA3	1216	M18	SASH1	GAGAGAGUCUGAGUCAUCUU	UGAAGGUUUUGACCAACUUC	GAAGAAUGUCCCCAUCUUCU	6.89973e+06	3.41301e+06	1.102	0.554972
ULA3	1216	N18	SELENOS	GACCGAGCUGCGGCUGCUGU	UCUGAAAGACCACGUAGAGA	CUUUUCAGUGGGCUCCCUGC	7.21844e+06	3.13559e+06	1.15291	0.509863
ULA3	1216	O18	SENP2	UUGGGCCUGGUAUGUACAGA	GCACCGACCGGUCGCAGAAA	CACGGCCGAGGAGCCCGCUG	7667316	3.17244e+06	1.2246	0.515854
ULA3	1216	B19	SENP8	GUCCAUGUAACUCAAGACUA	UGGUCAUUGAGCCAGCUUGG	GCAGUCAUGAAACUGACUGU	7.39568e+06	3615026	1.18121	0.587821
ULA3	1216	C19	SEPTIN4	ACUCCAGGUCAUCAUCAUAG	GAUGCCCAGGUCUUAGCCUC	CAUCAUCCGUGGUGUCCUCC	7.44258e+06	3.5876e+06	1.1887	0.583362
ULA3	1216	D19	SGTA	UCUACACGAGGCGACUGUGC	CGGACGAGAGGCCCCCGUGC	GAUGGACAACAAGAAGCGCC	6.63536e+06	3.57138e+06	1.05978	0.580723
ULA3	1216	E19	SH3RF1	CCCGAGUGCAGGACUCUUGU	AUCGCUUGCAAAACGUAUGC	ACACUCCAAAAGAUCCAACA	6398915	3.6867e+06	1.02201	0.599476
ULA3	1216	F19	SH3RF2	CUGUAGACAUGGUUUGCAGA	ACACAGGCGUCCUGCAUUCG	CCAGAAGGCGCACGAGCAGC	6493685	3403739	1.03715	0.553464
ULA3	1216	G19	SH3RF3	GGCGCCUCCCCCAUGCUGCU	GAGGGCGACGAGGACAGGCC	GUCCUCGCCCGCCCCCGCGG	9506061	4.22511e+06	1.51828	0.687024
ULA3	1216	H19	SHARPIN	CGCAGCUGUGCCUCGGCGUC	CACAGCCAAGAGCACUGCGG	GAUGGCGCCGCCAGCGGGCG	7.46672e+06	3.4002e+06	1.19256	0.552889
ULA3	1216	I19	SHMT2	AGCUGGUCAGGAUGGCCAUU	AAACAGGGGCUGGACAGGCC	UGCUGCAGAGGGAGAAGGAC	7.43548e+06	3.71609e+06	1.18757	0.604255
ULA3	1216	J19	SHPRH	UUGACAGCCUCUCUUUGGUA	AGAAACGCAGUCCAUCCAAG	AUGUACAGAUGUGUUGGAAG	6.54722e+06	3.35094e+06	1.0457	0.544879
ULA3	1216	K19	SIAH1	CCAGAAGACGCAUAUUUACA	UUUGGGAUCCAUUCGCAACU	CCACUCUGACAUUGAAGAAU	6.77914e+06	3.65504e+06	1.08274	0.594328
ULA3	1216	L19	SIAH2	GAUGGGACAUCACAGCUUCC	CCCUACUCCUGCCCAUGUCC	GGUCAGGGAACAGCCCGUGG	8331803	4.02172e+06	1.33073	0.653952
ULA3	1216	M19	SIAH3	ACUCACCUUUAGGUUGUGUG	UCAGCACUACAAGGCUAAAC	UUUUCUUUACCCAGUGCUUU	6.87688e+06	3.29997e+06	1.09835	0.536592
ULA3	1216	N19	SIRT1	UUGAUACAGGAAAUAUAUCC	AUAGCCUUGUCAGAUAAGGA	CAAAGGAUAAUUCAGUGUCA	7591240	3.15735e+06	1.21245	0.5134
ULA3	1216	O19	SKP1	AAUUACUUGUAUUAAUCAAU	CAGCAAUAUUAAAAAAGGUA	GGUUUUCUUAGAUUUGGGAA	7.56008e+06	6043533	1.20747	0.982708
ULA3	1216	B20	SKP2	CUUCUGCAGGAAGCACCUCC	CCAUCCCCACGUGAAGCUGG	CUGGGGGAUGUUCUCACUGU	8614360	3.79551e+06	1.37586	0.617168
ULA3	1216	C20	SMAD1	CAGCUGUGAAGAGACUUCUU	AGAGAAAGCUGUUGAUGCUU	CGGUUGCCCUGGGCAGCUCA	7928550	3.56166e+06	1.26632	0.579144
ULA3	1216	D20	SMAD2	UGAGAAAGCAGUGAAAAGUC	GGGUCUGGAGGAGCAGGCGG	UGGCGGCGUGAAUGGCAAGA	9773985	4.69477e+06	1.56107	0.763393
ULA3	1216	E20	SMAD3	CCGAUCGUGAAGCGCCUGCU	CGAGAAGGCGGUCAAGAGCC	CUUGGUGUUGACGUUCUGCG	6.91822e+06	3.72496e+06	1.10495	0.605696
ULA3	1216	F20	SMAD4	ACUAUGCACAAUGCUCAGAC	AAAAAGAGCAAUUGAAAGUU	AUAACAGCUAUAACUACAAA	6291370	3.59798e+06	1.00484	0.585049
ULA3	1216	G20	SMAD7	CGCCACCGGCCCCAUGCGCU	GAGGGCGCAGGGGGAGGUGG	CCGGACGAGCGCAGAUCGUU	1.0239e+07	3.99022e+06	1.63535	0.64883
ULA3	1216	H20	SMURF1	UGAAGUCUUUGAUCUUGACU	GCACCGGUGCUAUCUGUGUA	GAACGGUGUAUGAAGACUCC	6.44825e+06	3.39398e+06	1.02989	0.551878
ULA3	1216	I20	SMURF2	UGCAAGUUAGCAGACAGCCG	CUCUGCCUGUUGCCGUAUUA	AACAUCAAUUGUGAAGAGCU	6528141	3226248	1.04265	0.524604
ULA3	1216	J20	SNX3	ACGAAAUCAGGGUCAAGGUG	GGUUGCUCACAUCGAUCUCG	CGGAGACCGUGGCUGACACC	6.48735e+06	3.45396e+06	1.03614	0.561631
ULA3	1216	K20	SOCS1	GCGGCCGUGCCCCGCGGUCC	AGGAAGGUUCUGGCCGCCGU	UAGGAUGGUAGCACACAACC	7.21023e+06	3.44985e+06	1.15159	0.560962
ULA3	1216	L20	SOCS2	ACCCUUCUCUCAUGACCCUG	GUGGGGGACCGCGGGGUCGG	GGGAGCUCGGUCAGACAGGU	7.44771e+06	3750393	1.18952	0.609832
ULA3	1216	M20	SOCS3	CAGCAGGUUCGCCUCGCCGC	GCACUGCGUUCACCACCAGC	CAGGGGGCGGCUCAUCCCGG	7.18897e+06	3.83123e+06	1.1482	0.622976
ULA3	1216	N20	SOCS4	CAGCUGUUCAUCCAUUGAGU	GCAGUUUCUGUUUAAGAGAU	GUAGUAGUCGGCACUCUUCA	7.02251e+06	3.59049e+06	1.12161	0.583832
ULA3	1216	O20	SOCS5	CUACAGAAGAUGAAGAAGAU	GUCAUUCCAGGAGCUAAUUU	GUCAUUCCAGGAGCUAAUUU	7.39389e+06	3.07365e+06	1.18093	0.499791
ULA3	1216	B21	SOCS6	UCUCACGUCUUUAAAGACUA	GUCCCGCGCCGUGGCCUCUG	GGAGGUGAGAGUCAAGGCCU	7751952	3.41369e+06	1.23812	0.555082
ULA3	1216	C21	SOCS7	CCGCAACGUGGGUCGGCCGC	CGGGGACACAGCAGUUCCGA	CGCUCGAGCGCCAAGCCCGG	6.82583e+06	3.58732e+06	1.0902	0.583315
ULA3	1216	D21	SOX4	UUCCGUGUUCUCGGCAUUGU	GGCGAUUCCCAGCUCGAGGC	GCUGGUGCAAGACCCCGAGU	7303125	3.99979e+06	1.16643	0.650385
ULA3	1216	E21	SPHK1	UUUUCUCAGCGGGCGGCCCC	GCAAGGCCUUGCAGCUCUUC	ACCAGUGAGCAUCAGCGUGA	8.08095e+06	3.97802e+06	1.29066	0.646846
ULA3	1216	F21	SPOP	GGAGAAGAAACCAAAGCUAU	CUGUCCAAAGAGUGAAGUUC	GUUUGCGAGUAAACCCCAAA	7.17531e+06	3.52938e+06	1.14602	0.573894
ULA3	1216	G21	SPOPL	CAAUAAAGUGGUGAUGUCUC	CUGGUCCCAUAGCAGAAAGC	UUAUAAGUGACAUAAAGUGA	6.54251e+06	3.44559e+06	1.04495	0.56027
ULA3	1216	H21	SPRTN	CCAUACUUUUCACGAUGAGG	CAGCACAGGCCACCGUAUUA	CACCAAUAGUCAUGAGCAGA	7.67014e+06	3.90644e+06	1.22505	0.635207
ULA3	1216	I21	SPSB1	AACAUGGGUCAGAAGGUCAC	CUGCUUCAGGGGCCUGUACG	CAGUAGCAGAUCCAGCCGGG	6.49426e+06	3.29229e+06	1.03724	0.535343
ULA3	1216	J21	SPSB2	CGUGGCGCCGCUGGGCCCCC	CCCUCGGGACAGGAGAGGUC	CUCCAUGGGCCAGACAGCUC	8100024	4.00021e+06	1.29371	0.650453
ULA3	1216	K21	SPSB3	CGAGUGCAGGCUGCUACAGA	GGCACCGCACUGGGGAUGGA	UCUCUCCCAGCACAGCGACU	7.13953e+06	3.62265e+06	1.1403	0.589061
ULA3	1216	L21	SPSB4	CUCGGGGAGCCUCAAGUCAG	UGCACCCCGCAGCUCCCGCU	CGUUGAGCGAGCGGUCCUCG	7.76029e+06	3.64141e+06	1.23945	0.592111
ULA3	1216	M21	STAM	AGUUGUCUCUCAAGGAACAA	UUAACUAACCACCAACAUGA	AAUGAACUUACUUUUAAAGC	7053802	3359278	1.12661	0.546235
ULA3	1216	N21	STAM2	UUUUCCUCCAGCAGGUUCUC	GCAGAUAUCAGACUAAACUG	UUCAGUUUUUCACAUACUUU	7.37028e+06	3.57597e+06	1.17716	0.58147
ULA3	1216	O21	STAMBP	UUGGUCCUGAUGUCUGACCA	CCAGCUGGGUAGUGCGGUAG	GCAUCCAUUUACUCUGAGGA	6503133	3.24179e+06	1.03866	0.527131
ULA3	1216	B22	STAMBPL1	AAGAAGCAAGAGUUAGCCCG	CAUUCAGCAAGGAAUUGUUC	AGGAGAGUGGCUAGCAUAAU	7.10868e+06	3.53249e+06	1.13538	0.574401
ULA3	1216	C22	STUB1	GCGCGGCGCCAUGAAGGGCA	CGAGAAGAGCCCGAGCGCGC	CGUAGCAGGCCGCCGCCUCC	7.02192e+06	3.19747e+06	1.12152	0.519924
ULA3	1216	D22	SUDS3	GCUCCAGCCUGGGCCGGGGC	CAGCUGUCGGGGCCGCGAGU	CCACCUCCGCUCCGGGCGGC	7980516	4.50047e+06	1.27462	0.731798
ULA3	1216	E22	SUFU	AUGGCGGAGCUGCGGCCUAG	CCGGGACUGCACGCCAUCUA	ACUUGACGAUAGCGGUAACC	7.08303e+06	3278255	1.13128	0.53306
ULA3	1216	F22	SUMO3	CACAGGACCAGUGCGCACAC	GCCUUCAUCAGCUUGCUCAG	CGGCCACCUUCAGGUUGAUG	6677808	3.27906e+06	1.06656	0.533191
ULA3	1216	G22	SUPT3H	AGUUAAACAAGAAAGAAUGG	CUCAACUCUAUUGACCAGAC	CUUCAUGAAGACAAAUUGAG	6.94612e+06	3.56381e+06	1.10941	0.579493
ULA3	1216	H22	SUZ12	CCAUUCGAAACAUUUUCUCA	AGGAGCCGUAGAUUUAUCAU	GUUAAACCUACUCAAACUAU	7.73481e+06	3.88974e+06	1.23538	0.632491
ULA3	1216	I22	SVBP	UCUGUAUGCCUGUAGUCUGC	CUGCUGGGCUGAUUUCUGUU	GUUUUUUCUUUACGUGCAGG	6.46446e+06	3.2021e+06	1.03248	0.520676
ULA3	1216	J22	SYTL4	UUGUCGGGGUUGUAAUCACC	AGGUCCGAUCACUGUAGUGU	GCGACUAAAGAAUGAGUUAC	6.21777e+06	2.98236e+06	0.993082	0.484946
ULA3	1216	K22	SYVN1	GUCAUCCCGAAAAACGGUGA	AGCACCUUCUGGAACGUUCC	GCAACUGAGGGCAGCAGAGA	7.13509e+06	3.64719e+06	1.13959	0.593051
ULA3	1216	L22	TAB1	AGAACAACUGCUUCCUGUAU	CAGCCGCUGGGCCACGAAGU	CACACGCCGCACAUCGGCCU	6.74532e+06	3.17998e+06	1.07734	0.51708
ULA3	1216	M22	TADA2B	GAAGAUAUGGCUGCCCACGU	ACGUGAGCAUGUACAUCCAC	ACAGACCACACCUGUCCCAG	7.90592e+06	2775323	1.26271	0.451281
ULA3	1216	N22	TADA3	GCCGGCUGGCAGAAGACAGC	UGGCAUCGGCAUCGAGGAGC	CUUGAAGUCGUGGAACUGCA	8.0728e+06	3.14208e+06	1.28936	0.510918
ULA3	1216	O22	TAF1	UAUUUCCGGUCUAUGGGACC	GACGAAGAUUCCGCUGGAGG	CAUCAAUGGAGCCGGGCAGC	6.82696e+06	2.85759e+06	1.09038	0.464658
ULA3	1216	B23	SMARCA2				4094429	1.51899e+06	0.653949	0.246996
ULA3	1216	C23	SMARCA2				4.15568e+06	1.27218e+06	0.663732	0.206863
ULA3	1216	D23	CUL1	CCCUCACAAUGUCGUCAACC	AUCUGGGACGACCUCAGAGC	CGUGUAGAGCUCCAUAUAUC	6.86199e+06	5.80983e+06	1.09597	0.944706
ULA3	1216	E23	CUL1	CCCUCACAAUGUCGUCAACC	AUCUGGGACGACCUCAGAGC	CGUGUAGAGCUCCAUAUAUC	6.59915e+06	5.52333e+06	1.054	0.89812
ULA3	1216	F23	OR5M9	UAAGGCAAUGCCUAAUUUCA	AACCUGUAGCUCCUGACGAC	AUCACUCUGUUGGGAAAUAU	7.57355e+06	4.06646e+06	1.20962	0.661225
ULA3	1216	G23	OR5M9	UAAGGCAAUGCCUAAUUUCA	AACCUGUAGCUCCUGACGAC	AUCACUCUGUUGGGAAAUAU	7.768e+06	3.5302e+06	1.24068	0.574027
ULA3	1216	H23	OR6N1	GAGCAAUGGACACAGGGAAC	AAUCUGGACACCCUGGAGAU	AGACCACCAGGAAUAUCAGC	7.71032e+06	3.45164e+06	1.23147	0.561253
ULA3	1216	I23	OR6N1	GAGCAAUGGACACAGGGAAC	AAUCUGGACACCCUGGAGAU	AGACCACCAGGAAUAUCAGC	7.49738e+06	3.38968e+06	1.19746	0.551178
ULA3	1216	J23	PLK1	GGCCCCGCACAUAGCGCCGC	CUCGGACGCGGACACCAAGG	UGCUGCUCAAGCCGCACCAG	8.03082e+06	1.90046e+06	1.28266	0.309024
ULA3	1216	K23	PLK1	GGCCCCGCACAUAGCGCCGC	CUCGGACGCGGACACCAAGG	UGCUGCUCAAGCCGCACCAG	7.59028e+06	2.03499e+06	1.21229	0.330898
ULA3	1216	L23	DMSO+RNAiMAX				6.09402e+06	5.9688e+06	0.973317	0.970555
ULA3	1216	M23	DMSO+RNAiMAX				6.23598e+06	6.01413e+06	0.995991	0.977926
ULA3	1216	N23	Cmpd 4+RNAiMAX				2.62458e+06	2.85326e+06	0.419189	0.463954
ULA3	1216	O23	Cmpd 4+RNAiMAX				2.95025e+06	2677267	0.471205	0.435337
ULA3	1217	B2	SMARCA2				4.3988e+06	1.47234e+06	0.723048	0.24556
ULA3	1217	C2	SMARCA2				4.24678e+06	1.9357e+06	0.698059	0.32284
ULA3	1217	D2	CUL1	CCCUCACAAUGUCGUCAACC	AUCUGGGACGACCUCAGAGC	CGUGUAGAGCUCCAUAUAUC	6837390	6.14388e+06	1.12389	1.02469
ULA3	1217	E2	CUL1	CCCUCACAAUGUCGUCAACC	AUCUGGGACGACCUCAGAGC	CGUGUAGAGCUCCAUAUAUC	7.12969e+06	5957673	1.17193	0.993632
ULA3	1217	F2	OR5M9	UAAGGCAAUGCCUAAUUUCA	AACCUGUAGCUCCUGACGAC	AUCACUCUGUUGGGAAAUAU	9061929	3781857	1.48954	0.630745
ULA3	1217	G2	OR5M9	UAAGGCAAUGCCUAAUUUCA	AACCUGUAGCUCCUGACGAC	AUCACUCUGUUGGGAAAUAU	7.81674e+06	3.51406e+06	1.28487	0.586081
ULA3	1217	H2	OR6N1	GAGCAAUGGACACAGGGAAC	AAUCUGGACACCCUGGAGAU	AGACCACCAGGAAUAUCAGC	8023702	3.7292e+06	1.31889	0.621962
ULA3	1217	I2	OR6N1	GAGCAAUGGACACAGGGAAC	AAUCUGGACACCCUGGAGAU	AGACCACCAGGAAUAUCAGC	8.25443e+06	3.67207e+06	1.35681	0.612434
ULA3	1217	J2	PLK1	GGCCCCGCACAUAGCGCCGC	CUCGGACGCGGACACCAAGG	UGCUGCUCAAGCCGCACCAG	7.79083e+06	2.22135e+06	1.28061	0.370481
ULA3	1217	K2	PLK1	GGCCCCGCACAUAGCGCCGC	CUCGGACGCGGACACCAAGG	UGCUGCUCAAGCCGCACCAG	7.57768e+06	2.22648e+06	1.24557	0.371336
ULA3	1217	L2	DMSO+RNAiMAX				6.2712e+06	6.04014e+06	1.03082	1.00739
ULA3	1217	M2	DMSO+RNAiMAX				6.00366e+06	5904054	0.986844	0.98469
ULA3	1217	N2	Cmpd 4+RNAiMAX				2.93773e+06	2.99355e+06	0.482886	0.49927
ULA3	1217	O2	Cmpd 4+RNAiMAX				3.09303e+06	2.97448e+06	0.508414	0.49609
ULA3	1217	B3	PDZRN4	GGAAGCUUUUCGCAAUGCCA	UAGUAGACCAGCCUAUGGGA	CUUCGAACACAUCAUGGCUC	7466894	3.57064e+06	1.22736	0.595518
ULA3	1217	C3	PEF1	GAGACUCACUUAUCAUCAUG	GAAGGAGCUAAAGCAGGCCC	CCUCAGGAUCCACAUUGGGA	7886771	3.67195e+06	1.29638	0.612415
ULA3	1217	D3	PELI1	UAGCCUACGUGAAACCAGAU	AAGACUCCAAGCCUGGAAUA	UCCAUCUGAUGUCUUCCAUU	6.93534e+06	3.2834e+06	1.13999	0.547612
ULA3	1217	E3	PELI2	CUGUGACAACGAAGUCGAUA	CCUGUCGCACACGAUCCUGC	UUUGGAAGAGUCAAAUCCGG	6.6819e+06	3.42707e+06	1.09833	0.571573
ULA3	1217	F3	PELI3	CACUCUGCCCAGAAUGGUGC	AACCUCAGACCUCCAGCACC	UGAAGAUGCGCAGCCAGGCG	8.42794e+06	4.25667e+06	1.38533	0.709936
ULA3	1217	G3	PER2	CCCCGUGGAGCAGUUUUCGU	CUGGGGCUCCACGGGCUCCU	GCCCAGCAUGAAUGGAUACG	7.6458e+06	4.21998e+06	1.25677	0.703816
ULA3	1217	H3	PEX10	CCCCCUGGAGCAGGAGCUGC	GAGGGCACAUGUAUCCGCGA	CCUCGCAGGCUACCAGACCC	9924952	4448507	1.6314	0.741931
ULA3	1217	I3	PEX12	CUUGACCACAUGCUGAAGAG	CAUCUUUGAGGUGGUAGCAC	GGAAACUAUGGCUGAGCACG	7.08458e+06	3.75978e+06	1.16452	0.627064
ULA3	1217	J3	PEX2	GUUAGCUCGCUUUGAGCCAG	GGGACCAAACUAGCUGCUCC	ACUCUUCGCAUUCUCUUUUC	6.83584e+06	3.63473e+06	1.12363	0.606208
ULA3	1217	K3	PEX5	UGGCGGUCACCAUGGCAAUG	GGCGAGCUUCAUGAGCGGGU	UCAGAGGCCGGGGCUCCGGG	9.40751e+06	4.47445e+06	1.54635	0.746257
ULA3	1217	L3	PHC1	CUGUACCACACAGAUCAAUC	GGCUUACCCGUAGAUACAUC	GGCUUACCCGUAGAUACAUC	7214881	3.91963e+06	1.18594	0.653723
ULA3	1217	M3	PHF14	UCGACGAAACCGACCACUUC	CAUGGAUGACUAUGACAGUG	GAGAUCUGCGUCUCAGAAAG	6.06384e+06	3.34443e+06	0.996736	0.55779
ULA3	1217	N3	PHF21A	UACCUGUGAAGCAGUCAGGU	UGUUGUUGUAGUUGCUGUAG	AUUGUGGCAAUGGCUGUAUU	7.55759e+06	3.54575e+06	1.24227	0.591367
ULA3	1217	O3	PHF23	ACCGAAAGAACCGAAAGUUG	GGGCCGGGAGGUAUGUGUCA	GACUCUCUCUUUGAUCUGGA	7.88702e+06	4.02974e+06	1.29642	0.672088
ULA3	1217	B4	PHF7	CAUGUUGGAUGUUCUGUGUU	GAUGUUCUCAACACUCUGUU	GCCCCACCUGUAUGCACUUG	6.90611e+06	3.1064e+06	1.13518	0.518091
ULA3	1217	C4	PHRF1	UCCGAGGAUUCUGAAGACGA	CAGGGGAAACUGGAAGCCGC	AGACCAGGCCGUGGGGACGC	8.41893e+06	4.02599e+06	1.38385	0.671463
ULA3	1217	D4	PIN1	ACCACUGCUGCUGUUGCCGC	UCACCAGCAGGUGCGAGCAG	GGAGAAGAUCACCCGGACCA	6.97499e+06	3.55775e+06	1.14651	0.593368
ULA3	1217	E4	PINK1	CGCCACCAUGGCGGUGCGAC	CUGCGCUUCACGGGCAAGCC	CGGCGGCGGGCUGUGUCCGC	6.14091e+06	3.60031e+06	1.00941	0.600467
ULA3	1217	F4	PINX1	GAAAUGUCAGACCCUGGAAC	CUUGGCAAAGUACUCCUGGA	CUCCUCUGGAGUGGAGGGAC	7.219e+06	3.77423e+06	1.18661	0.629473
ULA3	1217	G4	PJA1	UGAUCUGUGCAUUGGGACUU	CACCCACGAGCCAGCGGGAA	GUAUGGCCCAAUCCAACAGG	6.74346e+06	3.43688e+06	1.10845	0.573209
ULA3	1217	H4	PJA2	CUGUAUUGCCUAAUGAUUCC	UAUGAUCCAGAUGGCAAACA	CUUGAAGCACUACAAGCUCC	6.6652e+06	3.82028e+06	1.09559	0.637154
ULA3	1217	I4	PLAA	GGUGGUGCGGUCUCGGGACA	GUACGUCCAGCUCGUGGCCC	CAGACACUGGCCAUGACGAG	7.78909e+06	3974444	1.28032	0.662865
ULA3	1217	J4	PLK1	GGCCCCGCACAUAGCGCCGC	CUCGGACGCGGACACCAAGG	UGCUGCUCAAGCCGCACCAG	7736609	2.40374e+06	1.2717	0.4009
ULA3	1217	K4	PML	GGUUCACGCGCAGAUGCACG	GCGCUCGCGGAUCAGCUCCU	GCGGUACCAGCGCGACUACG	6.9668e+06	4046979	1.14516	0.674963
ULA3	1217	L4	POLB	GGCCGCCAUGAGCAAACGGA	GUGCUAACCUGUGAGCAUGU	GUCGGUGUGGGAGAGAAGGA	9793578	4.87624e+06	1.60981	0.813268
ULA3	1217	M4	PPIL2	AUAAUAAGACGGGUCCUGUU	GAGCUCUACAAGGAGUUCAA	GUCCACUUUCUUCUUCUCCG	7.59449e+06	3.60225e+06	1.24833	0.600791
ULA3	1217	N4	PRICKLE1	CCUGCUCUGGUCUCAGGCCC	UCCACAUCAGAUGAUGACUC	AAACUUUAUGCCUUUGGAGA	9690371	4.40459e+06	1.59284	0.734607
ULA3	1217	O4	PRKCE	AAGGCCAUUGAACACUACCA	CUGGUCGCUGCGCCAUGCGG	GUCCACAUUGAGGGCAAUGU	7501528	3862244	1.23306	0.644153
ULA3	1217	B5	PRKCG	UUCUGGGGCCAUGGCUGGUC	UUUCUGCAAAACAGGGGCCG	AGAAGCGAGCGGUGAACUUG	8.26917e+06	3.72511e+06	1.35923	0.62128
ULA3	1217	C5	PRKCQ	CUGUCUGCCACGAGUUUGUC	GUGGACCUUUGCCUGCUUGA	AUGAAUGAAUUUGAGACGGA	6.82494e+06	3.45358e+06	1.12184	0.575994
ULA3	1217	D5	PRKDC	CGCAUUCCUGCCCCAGGCCG	GCAGCGGUCCGCAGCGGACA	CUCGGCGGCAUGGCGGGCUC	8.39141e+06	4.12578e+06	1.37933	0.688105
ULA3	1217	E5	PRMT3	GUUAGGCGGCCGGGGCGCUG	ACAGCGGGGACGAGGCCGCC	GAACCUGUUACAGAACAGGC	7.45671e+06	3.75822e+06	1.22569	0.626803
ULA3	1217	F5	PRPF19	GAGCAGCUCAUCGACAUCAA	GAGAAGUACAUUGCGGAGAA	GGGGAUACACAUGGGUGCUC	7629863	3.93443e+06	1.25415	0.656192
ULA3	1217	G5	PRPF8	CCAAGUAAACCCUUUUGUCA	AUGAUCUUCCUGACAUGUUC	AUGCAGAAAAGCGGAAGUUU	6237336	3.26297e+06	1.02526	0.544205
ULA3	1217	H5	PSEN1	CACAACGACAGACGGAGCCU	CCAGGGUAACUCCCGGCAGG	CCCUGUGACUCUCUGCAUGG	7.17348e+06	4.11046e+06	1.17913	0.685551
ULA3	1217	I5	PSEN2	AUUCAUGGCCUCUGACAGCG	CGCGCUCCUGCCAGGAGGGC	GCUGGUGGGACCUACCCACU	8287570	4.32299e+06	1.36226	0.720997
ULA3	1217	J5	PSMA1	UUAUGGAUAUGAACUUUGAA	AGAGAUACAAGACGAGACAC	UUUUAGUAAUUUUAUGCGUC	1.31185e+07	1.24201e+07	2.15633	2.07144
ULA3	1217	K5	PSMA2	UAAUUAGGAUAACUACUAAC	GCCCCGUCCGUGGGAAUUAA	UCUGGACAAGUUUACCAGAC	12209210	1.11111e+07	2.00687	1.85312
ULA3	1217	L5	PSMA3	UGCAAAGAUGGUGUUGUCUU	UUUAAUGUUGAUCGGCAUGU	UCAGUUACUUCAAAAGAAAU	1.32788e+07	12403942	2.18268	2.06875
ULA3	1217	M5	PSMA4	UUGGGAAUUUUAGCAAAUGA	AGACUUCAUCAAGAAGCUUG	AUCUCACUUUCUCACAUAAG	1.24682e+07	12224191	2.04944	2.03877
ULA3	1217	N5	PSMA5	AUCACACUCACCAUGGCACC	GACCCAAGCUGUGUCCAAUC	UGCUCUUCUUCUAGAACCAC	12086815	11736135	1.98676	1.95738
ULA3	1217	O5	PSMA6	UGUUUAUUAGGACAAAUUAU	UGUGUGAUGACCGGAAUGAC	AAUUUGAAGAAAAUAACAAA	1.3508e+07	12731798	2.22036	2.12343
ULA3	1217	B6	PSMA7	GGCACCCACCUGCUUCAGAC	CCGGGUCCUCCACAGUCAGC	GAUGACUAUCCUUGCAUCGG	1.39999e+07	12593815	2.30121	2.10042
ULA3	1217	C6	PSMA8	UAGAAAUAUACCCAAAGCAA	AUUGUAGGUUUUGAUGAUGA	UGGUACUUAUCAUGCUUGGA	6878556	3574030	1.13065	0.596084
ULA3	1217	D6	PSMB1	UACUUACAAUUUGUAACAUU	CUGAUACUCGAUUGAGUGAA	UUUUUUCCUCAGUACUAUAC	1.17924e+07	1.18998e+07	1.93836	1.98468
ULA3	1217	E6	PSMB10	GCGCUCACCCAGGGCUGUGA	CUGACUGGACCGCAGCUCUA	GAGCAGGUACCAGGGCCACG	8323013	4.61409e+06	1.36809	0.769547
ULA3	1217	F6	PSMB11	ACCUGCCUCGGGCUGGCGGC	GGCCCACGGCACCACCACUC	ACACGCCACAUAGCUGCCAC	7.6456e+06	3.99197e+06	1.25674	0.665789
ULA3	1217	G6	PSMB2	CCGCUCCUACACCCCAGGCC	CAUCUGGACAAUAUUGCUGG	CGGGGCCUUGGAUACCGAUG	1.33611e+07	1.20809e+07	2.19622	2.01487
ULA3	1217	H6	PSMB3	AUGGGUGACCGGCUGUACAU	CCCUUGAAACUUACACUGUC	CCCGGCGUCUUGACCGGCCA	13937473	11665136	2.29096	1.94553
ULA3	1217	I6	PSMB4	GACUAAGAUGGAAGCGUUUU	CGGUAAAACUGUCCUGGGGC	CCUCUGUAAAGUGCAGACGC	9077030	6.57098e+06	1.49203	1.09592
ULA3	1217	J6	PSMB5	AUUUCGAUUCCUGGCUCUUC	AGACCAUCACUGAGACUCCC	CGUGUUGGAGAGACCGCUAC	11055967	9.94499e+06	1.81731	1.65864
ULA3	1217	K6	PSMB6	CGGCUACCUUACUAGCUGCU	GAAAGCCGAGAAGUUUCCAC	UGCACAAGGCCUGACGCGAU	11311975	1.07588e+07	1.85939	1.79438
ULA3	1217	L6	PSMB7	CCGAUUGGCUGUCACAACUC	CAGGUUGGAAGAAAUGAGCU	UUUUUCAGUUGUUGUGGUGC	13479073	1.31727e+07	2.21561	2.19697
ULA3	1217	M6	PSMB8	ACUAAUGUAGGACCCAGCUG	GAACUUGAAGGCGAGCGUGG	AGGGACUGGAAGAAUUCUGU	8.32664e+06	4.03879e+06	1.36868	0.673597
ULA3	1217	N6	PSMB9	CCCUCCUGACAGCGAGGCGG	GUAGAUGCGCUCGUGCAGCG	GUAGGCGGCCAUGUCGGCCA	6724022	3.61578e+06	1.10525	0.603046
ULA3	1217	O6	PSMC1	CUGUUUUUCAUAGGAAUCUG	AAACAGAGCAUACCUGUGCC	AAACAGAGCAUACCUGUGCC	1.20581e+07	11501569	1.98204	1.91825
ULA3	1217	B7	PSMC2	UGAUCGGCACCGAGGUAAUC	CAUGUCAACUGACCUCGGAU	AGGAGCUGGAUUCCCGCUCC	7.37203e+06	3.70496e+06	1.21177	0.61792
ULA3	1217	C7	PSMC3	CACCUUAGUCUGUGCGGCAC	CCAUACAUCAGCACCCCUUU	GUGGUUCAUUGGCAAGACAA	12738640	11117773	2.0939	1.85424
ULA3	1217	D7	PSMC4	CAGGAUGCGCACAUAAUAGU	GUGCUUGUGGAGGGCCACUG	AGCAUCAUGAUGCUCACCUC	1.26561e+07	1.09802e+07	2.08033	1.83129
ULA3	1217	E7	PSMC5	GGUGACACCCAAUUGCCGGG	AUGGGUCUACCUUGUUGGGC	UCAACUUAUGAGAUGAUUGG	11771860	11275875	1.93499	1.88061
ULA3	1217	F7	PSMC6	GGGGAUGCCGGGAAUGGCCA	CAAGAAGUUGCUUGAACACA	AGUCGAGGCACUUGAUUAAA	12239064	1.19351e+07	2.01178	1.99056
ULA3	1217	G7	PSMD1	GAGGUUUUAUACGAAGAUGA	AUCUAAAGUAUUUUAUCACC	CAAUGAUAACUCUGAAUAUG	8240249	9688888	1.35448	1.61593
ULA3	1217	H7	PSMD10	UUCGCCGACGUCGCCGACUG	CGGGAAGCUGGAAGAGUUGA	UUGCUGGGACAGCGAAAUGG	7391269	3.91872e+06	1.21493	0.653572
ULA3	1217	I7	PSMD11	UGAGAGCGGUAAGAUGGCGG	GUCGGUGCUGAGUAGAGACU	GGCGCGGCGACCUUUACCGA	12451107	12610131	2.04664	2.10314
ULA3	1217	J7	PSMD12	CAGCCGGCCUCUCCUCACCU	GGAGGUGGACUACAGCGCCA	CAGGCGGGGACCAUGGCGGA	1.50187e+07	1.19763e+07	2.46868	1.99743
ULA3	1217	K7	PSMD13	GCUGUCAUGAAGGACGUACC	GCCCGCUGUGUGGCACCGUC	CCCUCUAUCGCCGGGGCCCA	1.10634e+07	8636743	1.81853	1.44045
ULA3	1217	L7	PSMD14	UCUUUGUUUCAGGCCGGAGA	UGGUUGUUGGCUUUCUGGUG	CAUUCAGAGUGUAAAAGGAA	1.13507e+07	12670160	1.86576	2.11315
ULA3	1217	M7	PSMD2	GGAGGAGGGAGGCCGGGACA	GGCACGGACGAGAAGCCGAG	UGAGGCGCGACCCCGAGAGU	13482695	10289073	2.2162	1.71603
ULA3	1217	N7	PSMD3	GACCCCGGGUGCCAUGAAGC	AAGGCGAAACCGCCGCCCGG	AUCUCCACAUCCUGGGGGGC	9.73845e+06	5.42726e+06	1.60075	0.905168
ULA3	1217	O7	PSMD4	GUCAGCACUUCACAGUCACU	CACGCGGAUGCCCGUGCAGA	GACCUCAGAGCAGGGAGGAA	13987586	7162552	2.29919	1.19458
ULA3	1217	B8	PSMD5	GCAGGGAGAAGAGCGGGCCG	CGCGCUUCACUCCGUGCUGC	GGGGGGCAAGAUGGCAGCCC	7.82283e+06	3.6248e+06	1.28587	0.604551
ULA3	1217	C8	PSMD6	UCGCGAUGCAAUGAUGGCAA	UGAGUUGAAGCGUUUGGAUG	CCAGUCGAGGGAUUUGCACA	1.30497e+07	1.3175e+07	2.14503	2.19736
ULA3	1217	D8	PSMD7	UCAUUCAGAAUCGGCAAGGU	GAUGUAUCGAACAGUUUUGC	ACAAAGGUUUAUAUUUUUAA	1.14936e+07	12606738	1.88925	2.10258
ULA3	1217	E8	PSMD8	CUGACAUGUUCAUUAAGGGC	GUAGCCCCGCCCCGGGCCUU	AGGCGGCGCUGCCGUAAAUC	7.17811e+06	4.19046e+06	1.17989	0.698893
ULA3	1217	F8	PSMD9	GGGGUUCACGAUGUCCGACG	CGUGACUGUCAGCGACGUCC	GCUUUCCAGCACGUCAUAGU	7.02953e+06	3.84849e+06	1.15547	0.641858
ULA3	1217	G8	PSME1	CCUCUUCCCAGGUCACCACC	CAAUUUUGGAGUGGCUGUCC	AGCUCAAACACCUUCUCCUA	8270177	4.27741e+06	1.3594	0.713395
ULA3	1217	H8	PSME2	AUCCAGUUGUUAGCUAGAGA	UCACUUGCAAGAGCUGAUUC	GCAAUGUAACCCACAGGCUG	7.43501e+06	3.78647e+06	1.22212	0.631515
ULA3	1217	I8	PSME3	UUGCUUUUCAGCAUCCCAUU	UACAUUUCUCAAUCAACAGC	ACCUGAAGUGCAAAAAACAG	7.01601e+06	4074988	1.15325	0.679634
ULA3	1217	J8	PSME4	GAUCUGGGCCAGCUGCAAGU	UCUGCGGGACGAAGCCCCGC	GCUCAUGGAGCCGGCCGAGC	10063195	4.89906e+06	1.65413	0.817074
ULA3	1217	K8	PSMF1	CACACCUAUCCAUGAGCAGU	CGGUAGCAGGGGGGAACUCC	CGACUGGUGUGUGGGUGGUG	7.86538e+06	4.30007e+06	1.29286	0.717174
ULA3	1217	L8	PSMG2	GCAGUAUCUGUUGGAAAUGU	AACCAUUGGCACAAGACAAU	GAACUUAGCAUAAAUGCUGA	7.06291e+06	4.25289e+06	1.16096	0.709305
ULA3	1217	M8	PTEN	AUGUGCAUAUUUAUUACAUC	AUAACUUACCUUUUUGUCUC	UUUAUUGGAAAACAGAUUUU	6.80035e+06	3.89343e+06	1.1178	0.649353
ULA3	1217	N8	PTK2	CCACCUGGGCCAGUAUUAUC	AAUACUCGCUCCAUUGCACC	UUUGGUGUGUGAUUCAAGUU	7115158	3.80499e+06	1.16955	0.634604
ULA3	1217	O8	PTK2B	GCCCCUGAGUCGAGUAAAGU	GGUGGUGGUACCAGUAGAUG	UCCUGGGAAAAACUUCAAAC	7.15203e+06	3.9329e+06	1.17561	0.655936
ULA3	1217	B9	PTPN22	AUACCUGCAGUGAAUGCAUA	ACCCUAUUCUUGAGCUCAUC	ACCAGUUUCAUUACAAGAAU	6.78971e+06	3.20845e+06	1.11605	0.535112
ULA3	1217	C9	PTTG1	UCAGCAAUCAAAGCCUUAGA	UAGCUUUAGGUAAGGCUGGU	AGAAAAGUCUGUAAAGACCA	7.35187e+06	3.79802e+06	1.20846	0.633441
ULA3	1217	D9	PTTG1IP	GCGCCCUCACCAGCUCCGGG	GGAGCAGCGCGGCGCCACCG	GACCGGCCGACCAUGGCGCC	7.9591e+06	4.3844e+06	1.30827	0.731239
ULA3	1217	E9	PYHIN1	AAGAAAAUUGUUCUACUGAA	UCAUACUCUUCUUUCAUUUU	UUGCCCAAACCGGCAUCACC	7.6041e+06	4.10327e+06	1.24992	0.684352
ULA3	1217	F9	RAB1A	UUGUGUUACAGUGACCAAGU	CAUACACAACUAUGAUGCCA	UUGUAAUAGUGGGACACAGC	7716586	4.13891e+06	1.26841	0.690296
ULA3	1217	G9	RAB40A	UCCCCCCGAGAUGGCUGUAC	UCCCCCCGAGAUGGCUGUAC	UCCCCCCGAGAUGGCUGUAC	6.62384e+06	3.70058e+06	1.08878	0.61719
ULA3	1217	H9	RAB40AL	CAGGUGACUGUACGGGGACU	CAGGUGACUGUACGGGGACU	CAGGUGACUGUACGGGGACU	6.7307e+06	3.67771e+06	1.10635	0.613376
ULA3	1217	I9	RAB40B	GCGGAGGGCGUGCCGGGGUG	GGCGAGCCUGCAGGAUGGCG	GCGCCCUGGGCAGCCCGGUC	8.43426e+06	4.23149e+06	1.38637	0.705737
ULA3	1217	J9	RAB40C	AACCAAGAUCCGGGGGACUC	ACGCGCGGGCCUGCUCCGUC	GAUGCGGGAUAGCUCCGUGA	6.90825e+06	3502610	1.13553	0.584172
ULA3	1217	K9	RABGEF1	GCAUCCUUUCGGCCACAUUG	GAGAUUGCGGGUAUUGCACA	GAGAUUGCGGGUAUUGCACA	6.8169e+06	3.5938e+06	1.12052	0.599381
ULA3	1217	L9	RACK1	GAGGGCAAACUGGCCAUCUG	GAAUUCCACAGCGUGCUCUG	UAGAUAAGACCAUCAUCAUG	6234687	3.27882e+06	1.02482	0.546849
ULA3	1217	M9	RAD18	UGAAACAAGUUACUAAAGGU	GAUCGCUCCAGAUCCCUCAG	GCAGGGCUCGCCUCUUUUUG	6968674	3.70336e+06	1.14547	0.617654
ULA3	1217	N9	RAD23A	GUUGCAGACCAAAGCCGGCC	GAGGACUCUGGGGCAGCUGU	CUCUGGCGGCAGGUGGGGGA	8.71327e+06	4.05896e+06	1.43223	0.676961
ULA3	1217	O9	RAD23B	UUCCUCCACCACCACAACUG	GAUGGAUGCAGGUGUGGAAG	UCUUGUUUAGCUGCACUAGC	9.5794e+06	4.71801e+06	1.5746	0.786879
ULA3	1217	B10	RAG1	CGACAUCUCUGCCGCAUCUG	CCUGUGGAUGGUAAAACCCU	GGUUUUCCGGAUCGAUGUGA	7.21454e+06	3.45503e+06	1.18588	0.576236
ULA3	1217	C10	RAG2	GAAGCCUACAAUUUUCUCUA	UCCAGUGGGGCAGGAUCUUU	AACAUAGCCUUAAUUCAGCC	6897089	3871500	1.1337	0.645696
ULA3	1217	D10	RAPSN	CUGCCUGGUCACAGCCCACU	GGCAUUGCAGGUGUGGACAA	UCUCGAUCUGCUGCUUGGUC	7912376	4.07625e+06	1.30059	0.679845
ULA3	1217	E10	RASD2	CAUGCGGUAUGAGUUUUUGG	CUUCCUCAAUGGCCGCUUUG	CGUAAGGUAUACAACAUCCG	7112328	3.98128e+06	1.16908	0.664006
ULA3	1217	F10	RASSF1	UGGGCAGGUAAAAGGAAGUG	CGCCGGGCAUCCUGCAAGGA	CUAUUUCUUUAGAACAAGGA	8.60345e+06	4363207	1.41418	0.727704
ULA3	1217	G10	RASSF5	CCCCGCUGGCAGAGUGAAGA	GAAACUCCGGCGGCCUGUGA	CGCCAGGUUCACCUCCUUGA	7.73523e+06	4.30023e+06	1.27147	0.717201
ULA3	1217	H10	RBBP6	GGUAUCAUAGUUGAGUUUAG	CGACUUAAAGAAGCAGAUUA	ACCAAUGCGCAGACGAAAGA	8.9742e+06	5.26651e+06	1.47512	0.878358
ULA3	1217	I10	RBCK1	UUGCCCCCACCAGGUUUUUC	GUGGGUGAUUGGGCAGCGGC	CCCCAUUCUGCCGCACCCCA	6.73261e+06	3720379	1.10667	0.620492
ULA3	1217	J10	RBX1	UUCCAAAAUGGCGGCAGCGA	GAAGCGCUUUGAAGUGAAAA	CUCCGCGCCUCGACCAUCCU	9708223	7154587	1.59578	1.19326
ULA3	1217	K10	RC3H1	CAAAUGGGCAAGCCUUGCGG	AAGCCCAUCAGUUUGGGUUG	UGUACAAGCUCCACAAUGGA	7.3772e+06	4161489	1.21262	0.694061
ULA3	1217	L10	RC3H2	UUGAUGGCAGUCUGGUCAAA	GUGUGAACAACCUAAACUGA	UGCCUGUGCAGGCAGCUCAA	7.55401e+06	4.05066e+06	1.24168	0.675577
ULA3	1217	M10	RCE1	GGCGCAAUGGCGGCGCUGGG	GACACCCAGCAGCACAGCCC	GACGUAGAGGCUGCCCACGU	9.48481e+06	5.34012e+06	1.55906	0.890636
ULA3	1217	N10	RCHY1	CAACCUGACGGAAGCUUGUC	GGCUGCGAGCACUAUGACAG	AGGAGAUGGCGGCGACGGCC	8.20759e+06	4324277	1.34911	0.721211
ULA3	1217	O10	RFFL	CAGCUUGGUUCCAAGCCUGU	GGCCUGCAUCCUGGCUCCCU	CAGGCAGAACCAGUUGCAGC	9.12542e+06	3.90893e+06	1.49998	0.651939
ULA3	1217	B11	RFPL1	CUCUAGAUAGUCUGAGCAGA	AGAACAAAAUCAGGCCCAGU	AGAACAAAAUCAGGCCCAGU	7.03882e+06	3.3734e+06	1.157	0.562621
ULA3	1217	C11	RFPL2	CCAGAAUUGUCUCUCACCUC	UGCUGUAUUGUGUGGCCACU	CCGAUGGAGGUGGCUGAAUU	6.96009e+06	3.5894e+06	1.14406	0.598647
ULA3	1217	D11	RFPL3	GCAGCGAAUUGAUGCACUUG	GGAACAAAAUCAGGCCCAAU	GGAACAAAAUCAGGCCCAAU	6591689	3615586	1.0835	0.603014
ULA3	1217	E11	RFPL4B	GGCACAUCGCUCUAAAAUCA	AAGUCGGCUAUUGUGCUGCU	UCACAUCCUCCCGAAAAUGC	6.95022e+06	3.73505e+06	1.14243	0.622939
ULA3	1217	F11	RFWD2	CCCGAGGCCGCCCGAGCCGG	ACCGCCACGGAAGGCGGCGA	AGGCCGGGUCGGGCUCCGCU	7.86546e+06	3794901	1.29288	0.632921
ULA3	1217	G11	RFWD3	UGGCUGCUGAUCACCUCAGC	GCUGAUGUGGUCAGCAGCCA	AGCAAUGGAAUAUGAUGUUC	6889384	3857302	1.13243	0.643328
ULA3	1217	H11	RHOA	CUAUGUGGCAGAUAUCGAGG	GAGCAAGCAUGUCUUUCCAC	UUUCAGCAAUGGCUGCCAUC	7.91201e+06	4.12574e+06	1.30053	0.6881
ULA3	1217	I11	RHOT1	GGUUGGGAACAAAUCUGAUC	UACAGAAAUAGAAACCUGUG	UAAAUUCGGGUUUUAAAUAG	6.71908e+06	3790295	1.10444	0.632153
ULA3	1217	J11	RING1	GGACACCAGCUUCUUUCGGC	UCUCUAAGAUCUAUCCUAGC	GCUGGUUGUGCAGGCGGCUC	7.54137e+06	3.93926e+06	1.23961	0.656997
ULA3	1217	K11	RIPK1	AUGACAUUCAAGGACAUGUC	AACUGGACAGCGGAGGCUUU	UUUCAUGAUCAUGAGUCCCU	6.68237e+06	3.8957e+06	1.09841	0.649733
ULA3	1217	L11	RIPK2	GCCCGGGACCAUGAACGGGG	GCGGCUCAGGUAGCGCAGGU	GUGGAUGUGCAGGUGCUUCA	7.43525e+06	4.05493e+06	1.22216	0.67629
ULA3	1217	M11	RLIM	GUCACCUAUGAAAGUGAACG	CAAGUAAGAAGAGUUCGUCC	AGUGGUGAAUCUACAGGAUC	6.69492e+06	3.8869e+06	1.10047	0.648265
ULA3	1217	N11	RMND5A	UGAUUCUGACAUUAGCAGUG	UCACCUCAUUGAGAAGCCUU	UGUGGCUGAGGAGCUCUGUC	7.86147e+06	3774871	1.29222	0.62958
ULA3	1217	O11	RMND5B	CAUGGAGCAGUGUGCGUGCG	CCUACGGGCAGCACUGUGAG	GGGUGGCCACCCACCUGCGC	7.10869e+06	3.55828e+06	1.16848	0.593457
ULA3	1217	B12	RNF10	GCGGCGUUGGGGGAGCUCAG	CAACAGCUCCUCCGCCUCUU	UCCGCCUCGGCGGGGCCAGC	7592853	3.1544e+06	1.24807	0.526097
ULA3	1217	C12	RNF103	CAACCCCCGGCACUCCAAAA	UGCCACCCAGCUGGUGGAUC	CGAACAGGACCAGGAAAUAG	7280401	4069835	1.19671	0.678775
ULA3	1217	D12	RNF11	CACCCCAGCUCCGGAAGAUG	ACCGGGCUAGCUUUGGCGAG	ACACCCUCCCCUACCUGAUA	6.65136e+06	3.63583e+06	1.09331	0.60639
ULA3	1217	E12	RNF111	UAAAGUUUCCCAUGUCUCAA	ACUCUUCAUAUCCACUUUUA	GCAGCCAAAAGUUUUCCUGC	7220208	4.09431e+06	1.18681	0.682857
ULA3	1217	F12	RNF112	CCUAGCUCCAACUUGGGGAA	GGCCACAGUCCAGCGAGAUG	GCGGCUCACAGCCCGGGAGA	7.77585e+06	3.99116e+06	1.27815	0.665654
ULA3	1217	G12	RNF113A	UGGGUCACCCGCUUCUUUUC	CUGCCGCUUUCUCCGGGCUC	ACCUGAUCCACCGCCUUUCC	5805023	2.48562e+06	0.954194	0.414556
ULA3	1217	H12	RNF113B	ACACAGUGGCUCAGCCCCCG	CCGGCCUGCGACCCCGAGCA	GCAUACCUGGUCUGCUUGGU	7.41965e+06	3.97821e+06	1.2196	0.663494
ULA3	1217	I12	RNF114	CAAGAUGGCGGCGCAACAGC	AGGGGGUCAGCCUCCGCCGC	AAGCCGGUACAGGUGCCCUG	7.15069e+06	3.80312e+06	1.17539	0.634292
ULA3	1217	J12	RNF115	AGACCUCCACGGUUGCCAUU	GCUCUAUUAUCUUGGUCCAG	UUACUAGCUUUGGGGCCAUU	7177282	3.77371e+06	1.17976	0.629387
ULA3	1217	K12	RNF121	CGCAUGCAUGCCAAGCACCG	CCUCAUCGCAACCUUGGUGG	GGCUUACAUUGUAGGAGCGU	6.72395e+06	3.76355e+06	1.10524	0.627692
ULA3	1217	L12	RNF122	UCUUCUGCUGCUAUUUUAUC	CCAUAUAGAUGUUGAGCGGA	CCCUUUGCAGGGUGUUUCUG	6.99336e+06	3.79309e+06	1.14953	0.63262
ULA3	1217	M12	RNF123	CCCCAGGAACGGUGUAUCAC	CUGGGAAGUAGGCCAUACCC	AGGACGGCUGCCAAAGUUGA	8169871	4.2979e+06	1.34291	0.716812
ULA3	1217	N12	RNF125	UCCGUGCUGAGCACCGACAG	AGGACGUGACGGGCAACUCC	CAGCCUGUCCGGACCCGCUG	7.10699e+06	3.74891e+06	1.1682	0.625251
ULA3	1217	O12	RNF126	GCCCCCUCACCCUUCCAGCG	UCGGGCGCCGUACCGGUGCC	UCGUCAGCCUGCGCCCCAGG	7.27217e+06	3.61962e+06	1.19535	0.603688
ULA3	1217	B13	RNF128	GACAUUGUUGCAAUCAUGAU	AAGAGGCAUACAAGUGACAA	UGCCGCCGUAAUAAUAAAAA	6.88546e+06	3.40188e+06	1.13179	0.567373
ULA3	1217	C13	RNF13	GUUUUAAAUGCACAGAGAGC	CGUUGGAUCCCAUGCUAAUG	AUUUGUAACUAAAAAUUAAC	6.73407e+06	3.71418e+06	1.10691	0.619458
ULA3	1217	D13	RNF130	CGGUCGAUGCGAAACGUGAG	CUCGCGUUGUCUGCCCGUGC	CGGAGGGACGAUGAGCUGCG	7.09608e+06	3.57677e+06	1.16641	0.596541
ULA3	1217	E13	RNF133	GGAGUUAUAGUGCCACCAGA	GAAUCAUGUGUUGUCAGAGU	GUUGCAGAGCAAGUGUUGUU	7.04689e+06	3.63193e+06	1.15833	0.60574
ULA3	1217	F13	RNF135	CUCGGCUGCAUCAUCUGCCA	CCACUGCCUGGAGGCCCUGU	GCCCUGGCGGCAAGUGGGGC	8.82838e+06	4.48732e+06	1.45115	0.748404
ULA3	1217	G13	RNF138	CGUGGCCGCAGAGAGGUCCU	CAAAACGCCCGUGCGGACCA	AACCCGGCUCCGCGAGGGGG	8.53842e+06	4.48441e+06	1.40349	0.747919
ULA3	1217	H13	RNF139	AUCGUUCUACAGCUAACAUU	GAUCUCUUGGUUCCUGUAAU	UGUAUUUAAUGUGAGAAUCA	6.79115e+06	3.80475e+06	1.11629	0.634563
ULA3	1217	I13	RNF14	AAUGAGUGUCUCCAGAAUAG	GAAGAGGAUGGAUAAUCUGG	GUUUCAAGUCUAACCUGAGU	9257431	4.14695e+06	1.52168	0.691636
ULA3	1217	J13	RNF141	GCUGAGCUUAAUGAUGUGUA	AGUAGCAAAACAUGUUACGU	CAUCAUGGGACAGCAAAUUU	6.45204e+06	3.40656e+06	1.06055	0.568152
ULA3	1217	K13	RNF144A	CAACAAGGUACCGGCCCACC	CUGUCUUGGGGAGUACCCAG	CCAGAGUACAGAAGAUGCAU	8.51124e+06	4369334	1.39903	0.728726
ULA3	1217	L13	RNF144B	UUACACUUUAGAAGUUCAUC	CCUGGGUCACUCGAGGCAAC	GAAAUUCUGCUCGUGUUGCA	6.43759e+06	3.90964e+06	1.05817	0.652057
ULA3	1217	M13	RNF145	AAUACUUAUACUGGAAAAGA	GUUGGAUGUCCUGUACAGAU	CAUGGCUGCAAAGGAGAAAC	6.91348e+06	3701368	1.13639	0.617321
ULA3	1217	N13	RNF146	UAGCAGAAAACGUGCUUACA	UUGUCGACAAGAAAUUCCCG	GAACUCAAGGCAGCAAGUAG	6.64904e+06	3.52628e+06	1.09293	0.58812
ULA3	1217	O13	RNF148	GGGGAGAAUGCACAUGCAGU	GCAAAAUUUCCAUGCCUUUC	UCCCAUGUCUCACCAGGGGA	7.09816e+06	3.79909e+06	1.16675	0.63362
ULA3	1217	B14	RNF149	CCGAGACGCUCCACACCGUC	UCUCGAGUGGUUCUCGGCCG	CACGCCGCGAGCCCCGACGC	6.93706e+06	3.48228e+06	1.14027	0.580782
ULA3	1217	C14	RNF150	AUGCGAGGGAAAUGAUCAUC	CUGCAAGUUCCGGGUUCCGA	AUCUCCUUCCCUUUUGGCUC	7.16007e+06	3.84316e+06	1.17693	0.640969
ULA3	1217	D14	RNF151	ACCUGGCCUUUGCAGGGUGG	UCGUGUGCUCCGUCUGCCAU	UGCACUUUUUGCAGAAGAUG	8.26387e+06	4290166	1.35836	0.715522
ULA3	1217	E14	RNF152	GAGGCAGCUUGGUGACACCG	CAGUGUGCCUGCAGCAGAUG	GCUGUCCCAGGACUCUCUGC	7450267	4.26093e+06	1.22463	0.710646
ULA3	1217	F14	RNF157	UUCCGUGGCCUGGUAAUAGA	GUAGUGGACUUUAGCUUUAC	CUGGUUUUCUAGAUGUGCUG	7419232	3.89143e+06	1.21953	0.649021
ULA3	1217	G14	RNF165	AUGCUGAGACCUUUGAAAGG	GGGGUGGGCCAGCGGGAAGU	GCGCCGCUGUGCUGGUGGGC	8245981	3.93703e+06	1.35542	0.656626
ULA3	1217	H14	RNF166	CGUGUGGCCGCAGCUGCCGA	GGCAGGUGUACUGCGCCUCC	GGCUCAGCAGCGGCAGCCGC	7.51805e+06	3.97832e+06	1.23577	0.663512
ULA3	1217	I14	RNF167	CAUCCUUCAGGGGUUCCUUG	CACCCCCAGCCCCGGUCAAU	CGACUGCAACUUUGACCUCA	8803586	4.25383e+06	1.44708	0.709462
ULA3	1217	J14	RNF168	GAGUCCACGACGAUACCCGG	UCGACGGUCGACUGGAAGCA	GCACUCGGACAGCGAGGGGA	7511920	4.01357e+06	1.23476	0.669391
ULA3	1217	K14	RNF169	GCAGCCGCUCUGAGUCGGCG	ACAGCGAAGGUCCAGAAGCC	CGGAGGAAUCGGGCUGCGCC	8.3028e+06	4452300	1.36476	0.742563
ULA3	1217	L14	RNF17	AGAGACAGCGAUGGCGGCAG	GACUCUUCCUCCCCAUUCGC	GGAUACCCUCCUUCCACACC	9431041	4.87492e+06	1.55022	0.813049
ULA3	1217	M14	RNF170	CCUGAAAAGUGCAUAUACCA	AGUAAGCGACCAAGUACUUG	UUGAACUUCACCUUGAUAUU	7.23996e+06	3845231	1.19006	0.641315
ULA3	1217	N14	RNF175	ACGGGGAUGACUCACAUUGU	GGUCAUUGCCCAGAUAGUGC	GGGCCACGAUUCCAUGCACG	7.59435e+06	3.97533e+06	1.24831	0.663013
ULA3	1217	O14	RNF180	ACUGAAUUGUCCUUUCUGUG	CUGUACAUCUCUCCAAGAGC	UGUGACAAGUAUUUCACUGA	7.16232e+06	3.79323e+06	1.1773	0.632643
ULA3	1217	B15	RNF181	GCAGUCGUGUUCAUCGAAAU	ACAUGCUGCUGGAGCUCGCA	CAACCAGCAGGUUUCUGGGC	7.30985e+06	3.61116e+06	1.20155	0.602276
ULA3	1217	C15	RNF182	AGUGUCUUCAGGAGGUUGAC	AUCGAUACAAUCUGAAACAG	CAAAGUCUAUGAUCUUGUAG	7.20788e+06	3.81021e+06	1.18479	0.635474
ULA3	1217	D15	RNF183	CAUGCUCGCCCUGCUCCGCC	CUGUGGGCUGGCGACAGAGU	GGCCAGACAUUCCACGCAGA	10088408	5.29835e+06	1.65827	0.883668
ULA3	1217	E15	RNF185	CAGCCAAGGAUGGCAAGCAA	AAUGGCGCUGGCGAGAGCGG	CAGGCUGAUGACGGCAUCCU	7.92341e+06	4361593	1.3024	0.727435
ULA3	1217	F15	RNF186	GGCCAGCAGCUUGGGCAACC	AGCAGGGGCCACAGCGGUGG	CUGUUGCAGGGUCUUGGUGC	7.95069e+06	4.41194e+06	1.30689	0.735832
ULA3	1217	G15	RNF187	GGGGCCCGCAGGGAGCGCCA	UCGGCGCGCACCGGUUCCCG	GCUUCUGGGCCGAGGAGGAC	7.81491e+06	4.03303e+06	1.28457	0.672637
ULA3	1217	H15	RNF19A	AAGGGAGCUAAAUGGCGGGG	AAAAAAAGAAGAAUUUCAAU	AUGAGUUUACAUCGGCAAAU	7.05017e+06	3.56632e+06	1.15886	0.594797
ULA3	1217	I15	RNF19B	CCGCGCCCGGGCCAAGCCGC	CCGCUGCGGCACUUAGGGUC	GCCGGCCAUGGGCUCCGAGA	8.50889e+06	4023457	1.39864	0.67104
ULA3	1217	J15	RNF2	AAUUCACUGUGUAGACUUCG	AUCAUCACAGCCCUUAGAAG	AUCAUCACAGCCCUUAGAAG	6.97258e+06	3.49044e+06	1.14611	0.582142
ULA3	1217	K15	RNF20	GCAAACCAAAAAUCGCAAGC	CUCACGAAGUUCAUCUUCAA	UAUUGAUUGUCAACCGAUAC	6.68579e+06	3.5207e+06	1.09897	0.587189
ULA3	1217	L15	RNF207	GCUAUCUUCGGGCCCCUGGA	UCGUACUGCACGUGGCACAG	CGGGCAGGUGAGGCGGCCGU	7934248	4.17554e+06	1.30418	0.696405
ULA3	1217	M15	RNF208	AGGGGGCAGCCGGUAGCUCA	GGAUGACAUGGGGACCCUUC	GCCUCGGGCCCGGGGUCAGA	7.74094e+06	4.12238e+06	1.27241	0.687539
ULA3	1217	N15	RNF213	UCAGAGCAGCCCGCAAUUCC	ACCGGUCCCCCCACCUCUGC	CUCAGGCAACAGGAGCUCCU	7.42948e+06	3.66237e+06	1.22121	0.610816
ULA3	1217	O15	RNF214	GAGCAUAAUGGCAGCGUCUG	ACUAGAAGAUUCCGGAGGAC	ACACAUUACCUUAGACCAUC	6838866	3809521	1.12413	0.635359
ULA3	1217	B16	RNF215	UAGACAUCCCCUGCACCUGC	CUUAUUCUCCUGGUGGAACU	CAUCGUGGAUGCCGAGCAGG	7.32e+06	3.1964e+06	1.20322	0.533101
ULA3	1217	C16	RNF216	UAACCAGCAGUCUUCUUCGA	UCUCUGAGUCUUCGGAUGAC	AGAGCAGAAAGUCAUCAUCU	6802165	3.80288e+06	1.1181	0.634252
ULA3	1217	D16	RNF217	GCCGCGGGCGGCGAUGGGCG	GCCCCAGGAGUCGCAGACCC	GCCUCAGGGGGACAGCGCCC	9403090	4804249	1.54562	0.801262
ULA3	1217	E16	RNF219	GAUGUGGUGUCAAAGAAUCA	AGAAAGUGCUGUCUGGCAAA	ACGAAGUGAUAAGUAUAUAG	6.64079e+06	3.72967e+06	1.09157	0.622042
ULA3	1217	F16	RNF220	AGACUCCGAUGGACUUACAC	AUCACGGCUGGCCUCAGCCG	ACGUCCUUGUCAACUGAGAC	6.89557e+06	3.50407e+06	1.13345	0.584415
ULA3	1217	G16	RNF222	GCGGCAGAUGGGGCAGACCA	GGUACUUGACCAGGCAGUCA	CGGAACUUCUCAUAGCACAC	7.52231e+06	3.89097e+06	1.23647	0.648944
ULA3	1217	H16	RNF24	UCUUCUGUUGCUACUUGAUU	AACAUAUAUAUUGUGGUUUU	AUUUCCCACAUUACAACUUC	6.96454e+06	3.79524e+06	1.14479	0.632977
ULA3	1217	I16	RNF25	ACCGAGCAAGGCAGUGGCAG	GCCUUCCCUCUAGGAGAAGG	UGCCUCUAUGGUUUCCAGGU	8.26841e+06	4.07919e+06	1.35911	0.680335
ULA3	1217	J16	RNF26	CUGACUAGUCUUCUGCACUU	CCGGACCACGGCUUCGAUCA	CUGCUGUAUAGCUGCUGCUC	7.18735e+06	3.82817e+06	1.18141	0.63847
ULA3	1217	K16	RNF31	CAGGAUGCCGGGGGAGGAAG	CCUGAGGAGGGAUUCCGGGC	UGCAGGUAGCGGGCGGCUAG	9231650	4917235	1.51744	0.820106
ULA3	1217	L16	RNF32	AUCUCUAAAAAGAGAUACAA	UUUUCUGAGUCUUCUAGUUU	GUCAGCUUACCCAAAGUCAA	7.18032e+06	3.82781e+06	1.18026	0.63841
ULA3	1217	M16	RNF34	CUAUGUGGGCUUCGUGCUGU	GGCCAGCAGUCAGCAUUUGC	UAGGUGGAAAACUCAGGGUU	6.77429e+06	3713647	1.11352	0.619369
ULA3	1217	N16	RNF38	AGCAGACGGGGAGAUACAUU	GCUGCUGUGCGUAAGGGAGA	CCUCUCUGGCGCCUGACAGG	7.31124e+06	3.54142e+06	1.20178	0.590644
ULA3	1217	O16	RNF39	CCUUCGAGCGCGCAGAUGGC	GAAAGCGGCAAAAGUUAAUG	AUUUGACGAGACUGAGACUC	7.18199e+06	3.5995e+06	1.18053	0.600331
ULA3	1217	B17	RNF4	CCUUAGAAAGAAGAAGACCA	UGUGGUGAGCAGUGACGAUG	CCUGGCGUUUCUGGGAGUAU	6.77066e+06	3.12058e+06	1.11292	0.520456
ULA3	1217	C17	RNF40	GCCGCGGCCAUGUCUGGGCC	GGAAAAGAAGCUGAGUCGUG	GAGAUGCCUCCAAGACGAAU	6.96027e+06	4.12144e+06	1.14409	0.687382
ULA3	1217	D17	RNF41	GGCCUACCUGCUCCGCCAGC	GCAGACACGCAUCGCAGAGC	GCUCAUCUUUGGGCAUCUCC	6623041	3.44038e+06	1.08865	0.573793
ULA3	1217	E17	RNF43	UCUAGUGUGCUUACCCAGGC	UAAUGACGCUGAGAAGCUGA	UGUAGCUGCAGCAGCCGCUG	7.53331e+06	4.14367e+06	1.23828	0.691089
ULA3	1217	F17	RNF44	CUUCCUACCUUCCCCAGAGC	UCGCCGCUGGCCCACGGGGG	UGCCCCCCCGAUGCGACCAU	7.92718e+06	4.00841e+06	1.30302	0.668531
ULA3	1217	G17	RNF5	GGCUGGAGACACGGCCAGAA	GUCUCUCACCUGGGAUCCUG	UCUUCCACACCGUUUUCCAA	8.54532e+06	4127389	1.40463	0.688374
ULA3	1217	H17	RNF6	UGAAGGAUCUUUCUCAACAU	GUAGUAGUUCCAACAUUCCA	ACAGAGAUCAUACUGCAAAU	6783684	3.37905e+06	1.11506	0.563564
ULA3	1217	I17	RNF7	CGGAGAGGAAACCUGCGCCC	CUCCCUCAAGAAGUGGAACG	CGAUACGUGCGCCAUCUGCA	6.984e+06	3480933	1.14799	0.580557
ULA3	1217	J17	RNF8	UCCCAGGUGACUGUAGGACG	GGUUUCGAGAAAUCAUCAGG	UGUUGUCCAUAAUUGUCCAU	7486824	4.12184e+06	1.23064	0.687449
ULA3	1217	K17	RNFT1	CCACACAAGAUUGACAGGAG	CUGCACAGUCCUCCAGGAAC	GGCCUGAAGCAAAGACAUCU	7.26394e+06	3.84027e+06	1.194	0.640488
ULA3	1217	L17	RNFT2	UCAUCCAGAUGCCCGCGUCC	UCCACCAUGGCGGCCACCGC	CUCCCUCCUCCGAGUGCCCC	7639693	4.12741e+06	1.25577	0.688378
ULA3	1217	M17	RPL11	UCCCUGUUGCAGCAGGAUCA	UCUGUCUCAACAUCUGUGUU	UACUCACCUUUGGAAAACAC	6.66618e+06	1.55768e+06	1.09574	0.259792
ULA3	1217	N17	RPL23	AAAAGCACUCAAUGGGCCUG	UUGUGCUGACAACACAGGUG	UUAUAUCCACAGGACGUGGU	7.66992e+06	1.92077e+06	1.26073	0.32035
ULA3	1217	O17	RPL5	AUACCCUGCGGGCCAGCAGC	UUCUGCAAGAUGUUUGUACA	UUCUGCAAGAUGUUUGUACA	7.45894e+06	1.98462e+06	1.22605	0.330999
ULA3	1217	B18	RPS27A	GGCCCGUACCUCGAGGGUGA	CGGAAUCAUGGUCUAAGACA	CGGAAUCAUGGUCUAAGACA	8.55534e+06	2.32557e+06	1.40627	0.387863
ULA3	1217	C18	RPS3	UUGGAUUAGUUUGUCGCUGA	GUCAAAUGAGUUUUACCUGG	GUCAAAUGAGUUUUACCUGG	8515106	3.06209e+06	1.39966	0.510701
ULA3	1217	D18	RPS7	CCCUCUCACCUGGGAGAUGC	GGAGGCGGCCGCGCGUGUGU	CGUUGCUUCUUAGGCUCUUC	9015987	3.95978e+06	1.48199	0.66042
ULA3	1217	E18	RRAGA	GCUGAUGGGGAAGAGCGGGU	AUUACAUUGCUCGCGACACC	GGUUCCCUAGGAAUCGGACG	1.01863e+07	4.87318e+06	1.67436	0.812758
ULA3	1217	F18	RSPRY1	ACUACCUAAAUGAUCGUCUU	CGAGAGUCAACAACAGACCC	GGAAUUACCCAUGGUAGUAG	7.00841e+06	3.93116e+06	1.152	0.655646
ULA3	1217	G18	RTF1	CCUUUGUGUGGGUCGAGCAG	GGGCAAGAGGGGAGUCCGGG	CGUGAUCGACUCGGACACAG	1.19632e+07	6935874	1.96643	1.15678
ULA3	1217	H18	RUSC1	UCAGCCGGCUAUCACCCAAC	GUCCGCCACCAGGGCGUGGA	ACGCCUCCACCACGCUCCAG	7.11383e+06	3.72198e+06	1.16933	0.62076
ULA3	1217	I18	RUVBL1	AGAUGUGACCUUGCAUGACU	AGUAUGUCCCCUUGCCAAAA	UCUUUUUGCAGAGGCAGGGC	7197465	3.6553e+06	1.18308	0.609639
ULA3	1217	J18	RYBP	GAUCUUCAAGUACCUGGUGG	GGCUUCAGCACUGUUUCUGA	GCAGGUUUCGCUUGUCUUUU	7323662	3.59372e+06	1.20382	0.599368
ULA3	1217	K18	SAE1	GGCUGGCGGCGGCAUUAGCG	UCUGGGCCUCCAGUCCCCAC	UGGAGGGGGCGUCUAUUCUG	9738475	4.63575e+06	1.60075	0.773159
ULA3	1217	L18	SART3	AGAGUUUGAAAGUGCGAUUG	ACACGGAGCGAACUUUCUCA	CCUAACAUUUGGCUAGAGUA	6.55188e+06	3.28957e+06	1.07696	0.548641
ULA3	1217	M18	SASH1	GAGAGAGUCUGAGUCAUCUU	UGAAGGUUUUGACCAACUUC	GAAGAAUGUCCCCAUCUUCU	7241215	3.93782e+06	1.19027	0.656756
ULA3	1217	N18	SELENOS	GACCGAGCUGCGGCUGCUGU	UCUGAAAGACCACGUAGAGA	CUUUUCAGUGGGCUCCCUGC	7.4278e+06	3.62124e+06	1.22094	0.603958
ULA3	1217	O18	SENP2	UUGGGCCUGGUAUGUACAGA	GCACCGACCGGUCGCAGAAA	CACGGCCGAGGAGCCCGCUG	7.98802e+06	3813495	1.31302	0.636022
ULA3	1217	B19	SENP8	GUCCAUGUAACUCAAGACUA	UGGUCAUUGAGCCAGCUUGG	GCAGUCAUGAAACUGACUGU	7.71684e+06	3.8417e+06	1.26845	0.640726
ULA3	1217	C19	SEPTIN4	ACUCCAGGUCAUCAUCAUAG	GAUGCCCAGGUCUUAGCCUC	CAUCAUCCGUGGUGUCCUCC	7.64878e+06	4.2494e+06	1.25726	0.708723
ULA3	1217	D19	SGTA	UCUACACGAGGCGACUGUGC	CGGACGAGAGGCCCCCGUGC	GAUGGACAACAAGAAGCGCC	6.73178e+06	3526830	1.10653	0.588212
ULA3	1217	E19	SH3RF1	CCCGAGUGCAGGACUCUUGU	AUCGCUUGCAAAACGUAUGC	ACACUCCAAAAGAUCCAACA	6.98073e+06	3.98437e+06	1.14745	0.66452
ULA3	1217	F19	SH3RF2	CUGUAGACAUGGUUUGCAGA	ACACAGGCGUCCUGCAUUCG	CCAGAAGGCGCACGAGCAGC	6.89616e+06	3.73238e+06	1.13355	0.622494
ULA3	1217	G19	SH3RF3	GGCGCCUCCCCCAUGCUGCU	GAGGGCGACGAGGACAGGCC	GUCCUCGCCCGCCCCCGCGG	9852648	4.60675e+06	1.61952	0.768323
ULA3	1217	H19	SHARPIN	CGCAGCUGUGCCUCGGCGUC	CACAGCCAAGAGCACUGCGG	GAUGGCGCCGCCAGCGGGCG	7.22093e+06	3.81136e+06	1.18693	0.635667
ULA3	1217	I19	SHMT2	AGCUGGUCAGGAUGGCCAUU	AAACAGGGGCUGGACAGGCC	UGCUGCAGAGGGAGAAGGAC	7884599	4210365	1.29602	0.702213
ULA3	1217	J19	SHPRH	UUGACAGCCUCUCUUUGGUA	AGAAACGCAGUCCAUCCAAG	AUGUACAGAUGUGUUGGAAG	6947958	3.73884e+06	1.14206	0.623571
ULA3	1217	K19	SIAH1	CCAGAAGACGCAUAUUUACA	UUUGGGAUCCAUUCGCAACU	CCACUCUGACAUUGAAGAAU	6.94997e+06	4.0102e+06	1.14239	0.668829
ULA3	1217	L19	SIAH2	GAUGGGACAUCACAGCUUCC	CCCUACUCCUGCCCAUGUCC	GGUCAGGGAACAGCCCGUGG	9.21383e+06	4.69005e+06	1.51451	0.782216
ULA3	1217	M19	SIAH3	ACUCACCUUUAGGUUGUGUG	UCAGCACUACAAGGCUAAAC	UUUUCUUUACCCAGUGCUUU	6.97519e+06	3.83223e+06	1.14654	0.639147
ULA3	1217	N19	SIRT1	UUGAUACAGGAAAUAUAUCC	AUAGCCUUGUCAGAUAAGGA	CAAAGGAUAAUUCAGUGUCA	8.00742e+06	3.67185e+06	1.31621	0.612398
ULA3	1217	O19	SKP1	AAUUACUUGUAUUAAUCAAU	CAGCAAUAUUAAAAAAGGUA	GGUUUUCUUAGAUUUGGGAA	7828234	6.65998e+06	1.28676	1.11077
ULA3	1217	B20	SKP2	CUUCUGCAGGAAGCACCUCC	CCAUCCCCACGUGAAGCUGG	CUGGGGGAUGUUCUCACUGU	9426566	4.31859e+06	1.54948	0.720264
ULA3	1217	C20	SMAD1	CAGCUGUGAAGAGACUUCUU	AGAGAAAGCUGUUGAUGCUU	CGGUUGCCCUGGGCAGCUCA	8377622	4.15041e+06	1.37706	0.692214
ULA3	1217	D20	SMAD2	UGAGAAAGCAGUGAAAAGUC	GGGUCUGGAGGAGCAGGCGG	UGGCGGCGUGAAUGGCAAGA	1.00847e+07	4.48161e+06	1.65767	0.747451
ULA3	1217	E20	SMAD3	CCGAUCGUGAAGCGCCUGCU	CGAGAAGGCGGUCAAGAGCC	CUUGGUGUUGACGUUCUGCG	6.73587e+06	4.10168e+06	1.1072	0.684086
ULA3	1217	F20	SMAD4	ACUAUGCACAAUGCUCAGAC	AAAAAGAGCAAUUGAAAGUU	AUAACAGCUAUAACUACAAA	7.24499e+06	4.16257e+06	1.19089	0.694242
ULA3	1217	G20	SMAD7	CGCCACCGGCCCCAUGCGCU	GAGGGCGCAGGGGGAGGUGG	CCGGACGAGCGCAGAUCGUU	1.00685e+07	4.86824e+06	1.655	0.811934
ULA3	1217	H20	SMURF1	UGAAGUCUUUGAUCUUGACU	GCACCGGUGCUAUCUGUGUA	GAACGGUGUAUGAAGACUCC	6629817	3.63862e+06	1.08977	0.606857
ULA3	1217	I20	SMURF2	UGCAAGUUAGCAGACAGCCG	CUCUGCCUGUUGCCGUAUUA	AACAUCAAUUGUGAAGAGCU	6774946	3.60578e+06	1.11362	0.601379
ULA3	1217	J20	SNX3	ACGAAAUCAGGGUCAAGGUG	GGUUGCUCACAUCGAUCUCG	CGGAGACCGUGGCUGACACC	6.98975e+06	3667054	1.14893	0.611598
ULA3	1217	K20	SOCS1	GCGGCCGUGCCCCGCGGUCC	AGGAAGGUUCUGGCCGCCGU	UAGGAUGGUAGCACACAACC	7.36274e+06	3.86979e+06	1.21024	0.645412
ULA3	1217	L20	SOCS2	ACCCUUCUCUCAUGACCCUG	GUGGGGGACCGCGGGGUCGG	GGGAGCUCGGUCAGACAGGU	7.93028e+06	4.09078e+06	1.30353	0.682269
ULA3	1217	M20	SOCS3	CAGCAGGUUCGCCUCGCCGC	GCACUGCGUUCACCACCAGC	CAGGGGGCGGCUCAUCCCGG	7.89459e+06	4.05876e+06	1.29766	0.676928
ULA3	1217	N20	SOCS4	CAGCUGUUCAUCCAUUGAGU	GCAGUUUCUGUUUAAGAGAU	GUAGUAGUCGGCACUCUUCA	7593170	3.60617e+06	1.24812	0.601444
ULA3	1217	O20	SOCS5	CUACAGAAGAUGAAGAAGAU	GUCAUUCCAGGAGCUAAUUU	GUCAUUCCAGGAGCUAAUUU	8098606	3.84402e+06	1.3312	0.641113
ULA3	1217	B21	SOCS6	UCUCACGUCUUUAAAGACUA	GUCCCGCGCCGUGGCCUCUG	GGAGGUGAGAGUCAAGGCCU	8.17942e+06	3.35109e+06	1.34448	0.558902
ULA3	1217	C21	SOCS7	CCGCAACGUGGGUCGGCCGC	CGGGGACACAGCAGUUCCGA	CGCUCGAGCGCCAAGCCCGG	6.90813e+06	3.93041e+06	1.13552	0.655521
ULA3	1217	D21	SOX4	UUCCGUGUUCUCGGCAUUGU	GGCGAUUCCCAGCUCGAGGC	GCUGGUGCAAGACCCCGAGU	7.84256e+06	4.33703e+06	1.28911	0.723338
ULA3	1217	E21	SPHK1	UUUUCUCAGCGGGCGGCCCC	GCAAGGCCUUGCAGCUCUUC	ACCAGUGAGCAUCAGCGUGA	8.33073e+06	4.38226e+06	1.36935	0.730882
ULA3	1217	F21	SPOP	GGAGAAGAAACCAAAGCUAU	CUGUCCAAAGAGUGAAGUUC	GUUUGCGAGUAAACCCCAAA	7.75856e+06	3.89192e+06	1.2753	0.649103
ULA3	1217	G21	SPOPL	CAAUAAAGUGGUGAUGUCUC	CUGGUCCCAUAGCAGAAAGC	UUAUAAGUGACAUAAAGUGA	6.70875e+06	3.69928e+06	1.10274	0.616973
ULA3	1217	H21	SPRTN	CCAUACUUUUCACGAUGAGG	CAGCACAGGCCACCGUAUUA	CACCAAUAGUCAUGAGCAGA	7.77485e+06	4.21219e+06	1.27798	0.702517
ULA3	1217	I21	SPSB1	AACAUGGGUCAGAAGGUCAC	CUGCUUCAGGGGCCUGUACG	CAGUAGCAGAUCCAGCCGGG	6.8124e+06	3610685	1.11978	0.602197
ULA3	1217	J21	SPSB2	CGUGGCGCCGCUGGGCCCCC	CCCUCGGGACAGGAGAGGUC	CUCCAUGGGCCAGACAGCUC	8.55376e+06	4.41988e+06	1.40601	0.737156
ULA3	1217	K21	SPSB3	CGAGUGCAGGCUGCUACAGA	GGCACCGCACUGGGGAUGGA	UCUCUCCCAGCACAGCGACU	7.23362e+06	4.0662e+06	1.18902	0.678168
ULA3	1217	L21	SPSB4	CUCGGGGAGCCUCAAGUCAG	UGCACCCCGCAGCUCCCGCU	CGUUGAGCGAGCGGUCCUCG	7.89014e+06	4.09082e+06	1.29693	0.682275
ULA3	1217	M21	STAM	AGUUGUCUCUCAAGGAACAA	UUAACUAACCACCAACAUGA	AAUGAACUUACUUUUAAAGC	7.26434e+06	3.75358e+06	1.19407	0.626029
ULA3	1217	N21	STAM2	UUUUCCUCCAGCAGGUUCUC	GCAGAUAUCAGACUAAACUG	UUCAGUUUUUCACAUACUUU	8.03305e+06	3.78233e+06	1.32042	0.630825
ULA3	1217	O21	STAMBP	UUGGUCCUGAUGUCUGACCA	CCAGCUGGGUAGUGCGGUAG	GCAUCCAUUUACUCUGAGGA	7.22545e+06	3.53295e+06	1.18768	0.589232
ULA3	1217	B22	STAMBPL1	AAGAAGCAAGAGUUAGCCCG	CAUUCAGCAAGGAAUUGUUC	AGGAGAGUGGCUAGCAUAAU	7.32009e+06	3.50033e+06	1.20323	0.583792
ULA3	1217	C22	STUB1	GCGCGGCGCCAUGAAGGGCA	CGAGAAGAGCCCGAGCGCGC	CGUAGCAGGCCGCCGCCUCC	7.30023e+06	3.93413e+06	1.19997	0.656142
ULA3	1217	D22	SUDS3	GCUCCAGCCUGGGCCGGGGC	CAGCUGUCGGGGCCGCGAGU	CCACCUCCGCUCCGGGCGGC	8.11466e+06	5014797	1.33384	0.836378
ULA3	1217	E22	SUFU	AUGGCGGAGCUGCGGCCUAG	CCGGGACUGCACGCCAUCUA	ACUUGACGAUAGCGGUAACC	7.49094e+06	3.80053e+06	1.23131	0.633861
ULA3	1217	F22	SUMO3	CACAGGACCAGUGCGCACAC	GCCUUCAUCAGCUUGCUCAG	CGGCCACCUUCAGGUUGAUG	6.8434e+06	3.80924e+06	1.12488	0.635312
ULA3	1217	G22	SUPT3H	AGUUAAACAAGAAAGAAUGG	CUCAACUCUAUUGACCAGAC	CUUCAUGAAGACAAAUUGAG	7.25907e+06	3.95624e+06	1.1932	0.659829
ULA3	1217	H22	SUZ12	CCAUUCGAAACAUUUUCUCA	AGGAGCCGUAGAUUUAUCAU	GUUAAACCUACUCAAACUAU	8.5402e+06	4.24129e+06	1.40379	0.707371
ULA3	1217	I22	SVBP	UCUGUAUGCCUGUAGUCUGC	CUGCUGGGCUGAUUUCUGUU	GUUUUUUCUUUACGUGCAGG	6.80129e+06	3.57205e+06	1.11796	0.595754
ULA3	1217	J22	SYTL4	UUGUCGGGGUUGUAAUCACC	AGGUCCGAUCACUGUAGUGU	GCGACUAAAGAAUGAGUUAC	6773869	3.74746e+06	1.11345	0.625009
ULA3	1217	K22	SYVN1	GUCAUCCCGAAAAACGGUGA	AGCACCUUCUGGAACGUUCC	GCAACUGAGGGCAGCAGAGA	7.55646e+06	4.37462e+06	1.24208	0.729608
ULA3	1217	L22	TAB1	AGAACAACUGCUUCCUGUAU	CAGCCGCUGGGCCACGAAGU	CACACGCCGCACAUCGGCCU	7.06501e+06	3.58398e+06	1.1613	0.597743
ULA3	1217	M22	TADA2B	GAAGAUAUGGCUGCCCACGU	ACGUGAGCAUGUACAUCCAC	ACAGACCACACCUGUCCCAG	8.1519e+06	3.16967e+06	1.33996	0.528644
ULA3	1217	N22	TADA3	GCCGGCUGGCAGAAGACAGC	UGGCAUCGGCAUCGAGGAGC	CUUGAAGUCGUGGAACUGCA	8.26044e+06	3.11468e+06	1.3578	0.519472
ULA3	1217	O22	TAF1	UAUUUCCGGUCUAUGGGACC	GACGAAGAUUCCGCUGGAGG	CAUCAAUGGAGCCGGGCAGC	7.70377e+06	3.06642e+06	1.2663	0.511423
ULA3	1217	B23	SMARCA2				4266950	1.57677e+06	0.701375	0.262976
ULA3	1217	C23	SMARCA2				4.6387e+06	1.69887e+06	0.76248	0.283341
ULA3	1217	D23	CUL1	CCCUCACAAUGUCGUCAACC	AUCUGGGACGACCUCAGAGC	CGUGUAGAGCUCCAUAUAUC	7.31052e+06	6.03292e+06	1.20166	1.00618
ULA3	1217	E23	CUL1	CCCUCACAAUGUCGUCAACC	AUCUGGGACGACCUCAGAGC	CGUGUAGAGCUCCAUAUAUC	7.33874e+06	6.08738e+06	1.2063	1.01527
ULA3	1217	F23	OR5M9	UAAGGCAAUGCCUAAUUUCA	AACCUGUAGCUCCUGACGAC	AUCACUCUGUUGGGAAAUAU	8.24101e+06	4088626	1.35461	0.681909
ULA3	1217	G23	OR5M9	UAAGGCAAUGCCUAAUUUCA	AACCUGUAGCUCCUGACGAC	AUCACUCUGUUGGGAAAUAU	7.67455e+06	3.83597e+06	1.2615	0.639771
ULA3	1217	H23	OR6N1	GAGCAAUGGACACAGGGAAC	AAUCUGGACACCCUGGAGAU	AGACCACCAGGAAUAUCAGC	7.74888e+06	3.63206e+06	1.27371	0.605763
ULA3	1217	I23	OR6N1	GAGCAAUGGACACAGGGAAC	AAUCUGGACACCCUGGAGAU	AGACCACCAGGAAUAUCAGC	7.80431e+06	4.26442e+06	1.28283	0.711228
ULA3	1217	J23	PLK1	GGCCCCGCACAUAGCGCCGC	CUCGGACGCGGACACCAAGG	UGCUGCUCAAGCCGCACCAG	7.23589e+06	2.14608e+06	1.18939	0.357927
ULA3	1217	K23	PLK1	GGCCCCGCACAUAGCGCCGC	CUCGGACGCGGACACCAAGG	UGCUGCUCAAGCCGCACCAG	7.80354e+06	2.32588e+06	1.2827	0.387914
ULA3	1217	L23	DMSO+RNAiMAX				5856334	6025142	0.962628	1.00489
ULA3	1217	M23	DMSO+RNAiMAX				6.20358e+06	6.01408e+06	1.01971	1.00304
ULA3	1217	N23	Cmpd 4+RNAiMAX				3.02228e+06	3.14128e+06	0.496784	0.523908
ULA3	1217	O23	Cmpd 4+RNAiMAX				3.013e+06	3.05272e+06	0.495258	0.509138
ULA4	1216	B2	SMARCA2				4.39909e+06	1.76572e+06	0.700255	0.283215
ULA4	1216	C2	SMARCA2				4.32708e+06	1.69584e+06	0.688793	0.272005
ULA4	1216	D2	CUL1	CCCUCACAAUGUCGUCAACC	AUCUGGGACGACCUCAGAGC	CGUGUAGAGCUCCAUAUAUC	7.09683e+06	5812400	1.12969	0.932286
ULA4	1216	E2	CUL1	CCCUCACAAUGUCGUCAACC	AUCUGGGACGACCUCAGAGC	CGUGUAGAGCUCCAUAUAUC	7.42613e+06	5539748	1.1821	0.888553
ULA4	1216	F2	OR5M9	UAAGGCAAUGCCUAAUUUCA	AACCUGUAGCUCCUGACGAC	AUCACUCUGUUGGGAAAUAU	7.92638e+06	3.67509e+06	1.26174	0.58947
ULA4	1216	G2	OR5M9	UAAGGCAAUGCCUAAUUUCA	AACCUGUAGCUCCUGACGAC	AUCACUCUGUUGGGAAAUAU	8.41459e+06	3.94819e+06	1.33945	0.633273
ULA4	1216	H2	OR6N1	GAGCAAUGGACACAGGGAAC	AAUCUGGACACCCUGGAGAU	AGACCACCAGGAAUAUCAGC	8.50989e+06	3.91187e+06	1.35462	0.627448
ULA4	1216	I2	OR6N1	GAGCAAUGGACACAGGGAAC	AAUCUGGACACCCUGGAGAU	AGACCACCAGGAAUAUCAGC	7.93373e+06	3.99809e+06	1.26291	0.641278
ULA4	1216	J2	PLK1	GGCCCCGCACAUAGCGCCGC	CUCGGACGCGGACACCAAGG	UGCUGCUCAAGCCGCACCAG	8.27556e+06	2.13722e+06	1.31732	0.342801
ULA4	1216	K2	PLK1	GGCCCCGCACAUAGCGCCGC	CUCGGACGCGGACACCAAGG	UGCUGCUCAAGCCGCACCAG	8.70371e+06	2.19067e+06	1.38547	0.351375
ULA4	1216	L2	DMSO+RNAiMAX				6.54675e+06	6.51179e+06	1.04212	1.04446
ULA4	1216	M2	DMSO+RNAiMAX				6.4894e+06	6.18307e+06	1.03299	0.99174
ULA4	1216	N2	Cmpd 4+RNAiMAX				3.40585e+06	3.06971e+06	0.542149	0.492369
ULA4	1216	O2	Cmpd 4+RNAiMAX				3.12155e+06	2.96052e+06	0.496894	0.474856
ULA4	1216	B3	TNFAIP3	CUUUGUAUUUGAGCAAUAUG	AACCAUGCACCGAUACACAC	UGGAUGAUCUCCCGAAACUG	6.89272e+06	3.21452e+06	1.0972	0.515596
ULA4	1216	C3	TNIP1	CUGCUCAUUCUUGUGCACCU	CGGCCAGCUCUUCACCCACC	GCAUCAGGUUGCCGUCCUCA	7.50191e+06	3.61003e+06	1.19417	0.579034
ULA4	1216	D3	TNIP2	CGCGGCGUCCCCCUCCAGCG	GCAGCCGCUGUCCGGCCUCG	UCCCGGGACCCGGGGUCGGG	8297593	3.55011e+06	1.32082	0.569423
ULA4	1216	E3	TNIP3	CCGGGACCGGCUGCAGCGGG	AGAGGCAGAGAAAGGACGAC	AGCAGAGCUGAAGACGAAAC	6.93264e+06	3.32752e+06	1.10355	0.533721
ULA4	1216	F3	TNKS	CGCUAGGCCGUGCCGCGGGG	CGAUCCCCGGACCCGGUUGA	CGCUGGGACCACGGGAGCGG	8.21416e+06	3.45786e+06	1.30754	0.554628
ULA4	1216	G3	TNKS2	AUGUCGGGUCGCCGCUGCGC	UGUUCGAGGCGUGCCGCAAC	GAAGGUGAACAGCCGCGACA	7.39523e+06	3761004	1.17719	0.60325
ULA4	1216	H3	TOMM20	ACAGGCUUCGAGAACGUGAG	AAGGGCCCCGCAUACACCGG	AAGGGCCCCGCAUACACCGG	7.50407e+06	3.49097e+06	1.19451	0.559937
ULA4	1216	I3	TOPORS	GGUAGCGAAAUCGUCGAUCA	GAGGGCAGAAGAUGACUUCA	GUUCUGUUUUCGCUGUGUAC	6.35499e+06	2.94579e+06	1.0116	0.472492
ULA4	1216	J3	TP53	CGCUAUCUGAGCAGCGCUCA	GUGCUGUGACUGCUUGUAGA	CAACAAGAUGUUUUGCCAAC	5.69318e+06	3.3944e+06	0.90625	0.544448
ULA4	1216	K3	TPP2	CAUGGCCACCGCUGCGACUG	GCCGCUACCCGGAGUAUGAU	GGGGUCGACCCGGGGGCUCC	7.42152e+06	3.73152e+06	1.18137	0.598521
ULA4	1216	L3	TPR	AUUUCUCAUGCCGCCCCUUC	GGAACUUUUCAAGUUUGUUC	GCAGCAAGUCCUGGAGCGCA	7445289	3.53394e+06	1.18515	0.566829
ULA4	1216	M3	TRAF2	GCAGCUAGCGUGACCCCCCC	CAGGUACUUGGCUUCCAGCU	ACCGGUGGCCACACUGCGCC	7.86318e+06	3.31086e+06	1.25168	0.531048
ULA4	1216	N3	TRAF3	CACAUGGAAGUUCUUCAAAA	GGAGAAGGCGUGUAAAUACC	GGUUCCGAUGAUCGCGCUGC	7600257	3.48106e+06	1.20982	0.558348
ULA4	1216	O3	TRAF4	CUUGUAGUCGAAGCCAGGCA	GCCCAUGCGCGAGCCUGUGC	AGCACCUGAGGAACUCCUGC	7308060	3.43247e+06	1.16331	0.550554
ULA4	1216	B4	TRAF5	GCUUAUUCAGAAGAGCAUAA	GUCCAAGGAAAUGGAGUUGC	CAAAUGUGCCUUCUGCCACU	8.03051e+06	3.84226e+06	1.27831	0.616283
ULA4	1216	C4	TRAF6	GUUCUUAAAUGUGUACUUGA	AAUGGCAUUUGAAGAUAAAG	UCAGAAUGUGAAUAUUAAUA	7.28066e+06	3.21605e+06	1.15895	0.515842
ULA4	1216	D4	TRAF7	UCUCCCAGAGAAGUGUCCCG	AUCGCGGUGGCCGAGCAGAU	UCUUUGAGGUGGACCCCCGA	7.20811e+06	3.50951e+06	1.1474	0.562911
ULA4	1216	E4	TRAIP	CUGAGGACCUACUUUCAGUG	UACUGUGGUAUCUCUGCAGC	CAAGGAGAAACGAGACAGCC	8.76478e+06	3.82431e+06	1.39519	0.613404
ULA4	1216	F4	TRIB1	GCCCAGGACGGGAUGCGGGU	AAGAGCAGGGCCGGGCCGCG	CGCCACAGCCGCCGCGUCGU	8.21936e+06	3.82666e+06	1.30837	0.613781
ULA4	1216	G4	TRIB2	CUUCUUGCAGGUGCGGACGA	CCACUGCCAUGACGGGGGGC	CUUUAAGGACGAAGAGAGGU	6.73136e+06	3.36914e+06	1.07151	0.540397
ULA4	1216	H4	TRIB3	UUCCUGGACAGGGAACCCGC	GUCCAGAAACGAGCUCGAAG	GUUGCACGAUCUGGAGCAGU	7.27392e+06	3.67368e+06	1.15787	0.589244
ULA4	1216	I4	TRIM10	UUUGCAGAGUGGGCAAGUAG	AGUAGCGGGUAAGGCAGGCC	GUUGACUUCAUCUGCCAGGC	7.37557e+06	3.92594e+06	1.17406	0.629705
ULA4	1216	J4	TRIM11	CACACGGUCCUCAGCUCCAU	GGUUGUCCCCUCUAGGGUCC	ACAUCAAGGACGCCCUGCGC	7.74079e+06	3728398	1.23219	0.59802
ULA4	1216	K4	TRIM13	CAAGUGUCCUACAUGCCGUA	ACUUUUCCACAAUACCCUUC	CCCAAGUGUCCUUUGCAUAC	7.08555e+06	3512893	1.12789	0.563454
ULA4	1216	L4	TRIM15	UACCCUCUGUGCGGGGCCGC	CUCCCCGCGCUCUCCCAGAU	GCUCUGCCAAGAGGAGGAGC	7390184	3.69482e+06	1.17638	0.592635
ULA4	1216	M4	TRIM17	UCGCCUUUUCCCAGCUCAGC	GACCCUGUGAUGACCACCUG	GGAACUCGCCAGAAAACUGC	7.38953e+06	3870155	1.17628	0.620757
ULA4	1216	N4	TRIM2	UGGUCUAGGAUGGCCAGUGA	UCUGAUUUGCAGUAUAUGCC	CGCAGAAAGUGUGCAGACAG	6.80738e+06	3.46827e+06	1.08361	0.556296
ULA4	1216	O4	TRIM21	UUCCCCCUGUGUGCCCUCUC	AUGUUGGCUAGCUGUCGAUU	CUGCCAGGAAUGCAUCUCUC	7.14917e+06	3.29864e+06	1.13802	0.529088
ULA4	1216	B5	TRIM22	UGGCCACAAUCUAGGCUCAG	GAGUCAGUGAUCAUCUCAAG	CCUCCGACCUAAUCGGCAUC	6.82308e+06	3.36588e+06	1.08611	0.539874
ULA4	1216	C5	TRIM23	AUGAACCGAAGGGAGGCCGA	CCGGGGGACAGCUGUAGUGA	CCCUGCGAGGAUGGCUACCC	7.05383e+06	3.28415e+06	1.12284	0.526765
ULA4	1216	D5	TRIM24	GGCGGUGGAGAAGGCGGUGG	GGCCGAGAGUCGGCAGGGCC	AGUGUCCAACAGGUUGAGCC	10103378	4.67567e+06	1.60827	0.749959
ULA4	1216	E5	TRIM25	CUGCGGUCGCGCCUGGUAGA	GAAUGAGACGUGGGCAGUCC	AGCACGACAGCUCCUCGGCC	7.73348e+06	3.73272e+06	1.23103	0.598713
ULA4	1216	F5	TRIM26	UAAAAGGCUUCUUGCAGAGU	GAAGACGUGGCCACAGUCAA	CCUCUUCCAGGCUCCGUAGU	7.38804e+06	3.96283e+06	1.17604	0.635622
ULA4	1216	G5	TRIM27	CCGUGCCCCAGCAGCGGGCG	UGGGCUCUGCGAAGUACUGC	AGGCCGGCGCCAUGGCCUCC	6.78997e+06	3.30831e+06	1.08084	0.530639
ULA4	1216	H5	TRIM28	GGCGGCAGCCUCGGCAGCAG	CCGCCAGCGGAGCCCUCGCC	CGCGGCGUCGUCGCCCGCGG	7992492	4.03655e+06	1.27226	0.647447
ULA4	1216	I5	TRIM3	AAUGCAGCAGGCACCUGAUG	GUGCCGAGACGCCCUGCUCU	GAUAGCGUCAGGCUCUGGGC	9.2064e+06	4.17445e+06	1.46549	0.669565
ULA4	1216	J5	TRIM31	CCUUACGGAAGUUUUGCAGA	AACCUGUCACCAUCGACUGU	GUUUGUGAACAAACUGCAAG	7.12254e+06	3.5573e+06	1.13378	0.570577
ULA4	1216	K5	TRIM32	CCAAUAGCUUCUCCAGGCAC	GCUGGGUCAAGCUGGUUAUG	CUGGGCUCAGCGAGGCUGUG	7.82937e+06	4.00792e+06	1.24629	0.642855
ULA4	1216	L5	TRIM33	GUAGUUGGUACAGGUGCUGG	UGUGCUAAGUUAAUCUGUCC	UAUACUCCUAAUGUUGUAGU	7811674	3.59465e+06	1.24348	0.576567
ULA4	1216	M5	TRIM35	AUGCUUGCAUCUGUGGAAUC	AUCGAUGUCUGCAAGUACCU	UUCCAGACUCUUCUGCACCA	7.87394e+06	3.90472e+06	1.25339	0.626301
ULA4	1216	N5	TRIM36	CGAUGAUUCAUUCAACGAUG	UGUUGGCAAGGGAGAAUCAA	UUACCAUUAAGAAUAUCGAA	7.60684e+06	3.59511e+06	1.21087	0.576642
ULA4	1216	O5	TRIM37	AAAUAAAAAGAUAAGGGAAA	ACAGCUGAAACAACACAGUU	UUUCCGAUGUUUCAUUUGUA	6.9792e+06	2.60982e+06	1.11096	0.418605
ULA4	1216	B6	TRIM38	CUCCAUCAUCUUCUUGGUGC	AACCCAGUAAGCAUCAACUG	GCCUCAGUUGCUUUUGGCUU	6.84096e+06	3.22016e+06	1.08895	0.5165
ULA4	1216	C6	TRIM39	GGCAGAGACAAGUCUGUUAG	GGCUUUGGAGAACUUACAGG	AACCUGUCAUCAUUGAGUGU	7.85546e+06	3.49225e+06	1.25045	0.560142
ULA4	1216	D6	TRIM4	UCUCACCUGAAGCAGCUCCA	AUUGAAGAAGCUCAUCUUAG	UGUUCAAUCUCUGAAGAAAC	7.50444e+06	3.63038e+06	1.19457	0.582299
ULA4	1216	E6	TRIM40	GUCCUUCUGCAAAGGGAUCA	CGGCCUCCUUCAGGCUCUCC	CCUGACACAGCAUGUGGAGA	7.88826e+06	3.83538e+06	1.25567	0.615179
ULA4	1216	F6	TRIM41	CUGCCAGCUCUGACUUCAUC	GAGAUGCAUGAAGCCCAGCU	GCUGGGCGGCCUGUUCUGCA	6.87635e+06	3.30492e+06	1.09459	0.530096
ULA4	1216	G6	TRIM42	GCAGCUGCAGAAGCACGCCG	CUGCCCGAGAACUACCUGCA	AGCGGUCAAAGCGCCACUUG	7.35563e+06	3526592	1.17088	0.565651
ULA4	1216	H6	TRIM43	AGGGAAGAACAGCCUUCCUC	AGGGAAGAACAGCCUUCCUC	AGGGAAGAACAGCCUUCCUC	7.23782e+06	3710665	1.15213	0.595176
ULA4	1216	I6	TRIM44	CACCCACAUGGCCUCUGGAG	UGACGAGUGCGAGCCCGACG	CUACUGCCGCCGCCAUGCCG	7.50836e+06	3.65957e+06	1.19519	0.58698
ULA4	1216	J6	TRIM45	GCAGCAGAAGUGGCAGAGGU	GGCCCUGGCCUUCCCCACGU	GGCUUUAACCAUAGACCACC	7.54686e+06	3660530	1.20132	0.587134
ULA4	1216	K6	TRIM46	UUCCCGUGCCCAGCCUGCCA	GCUUUUCCGGAACCUGACCC	CUUGCACAACUGGCACAGGA	8567149	4.12373e+06	1.36373	0.661429
ULA4	1216	L6	TRIM47	AGCCGGCGGACCCGGAGGCG	AGACAGAAGUUGUGGCCGCA	CGCGGAGUCAUGGACGGCAG	8.0182e+06	3.87271e+06	1.27635	0.621167
ULA4	1216	M6	TRIM48	UAUGUCUCGAAGAAUCAUUG	UAUGUCUCGAAGAAUCAUUG	UAUGUCUCGAAGAAUCAUUG	7787977	3.83555e+06	1.2397	0.615207
ULA4	1216	N6	TRIM49	GGUUUUGAGGUUUAUCUGCU	GGUUUUGAGGUUUAUCUGCU	GGUUUUGAGGUUUAUCUGCU	7.70928e+06	4.05293e+06	1.22718	0.650074
ULA4	1216	O6	TRIM49B	AUGGGCUGUCUUUCCAGUUG	AUGGGCUGUCUUUCCAGUUG	AUGGGCUGUCUUUCCAGUUG	7.56984e+06	3.18748e+06	1.20498	0.511259
ULA4	1216	B7	TRIM5	GGUAACUGAUCCGGCACACA	ACUUCUUGUGGUUUGCAGUG	CCUGGUUAAUGUAAAGGAGG	7.12121e+06	3.16031e+06	1.13357	0.506901
ULA4	1216	C7	TRIM50	GUCCACCGCCUGCCGGCACA	GUGUGGCCACUCUUACUGCA	GCCUGCCAGAGCUGGAGGAC	7.46179e+06	3.41982e+06	1.18778	0.548526
ULA4	1216	D7	TRIM51	ACUCACCUCUGAAUCCACUG	ACUCACCUCUGAAUCCACUG	ACUCACCUCUGAAUCCACUG	6.97304e+06	3.6916e+06	1.10998	0.592118
ULA4	1216	E7	TRIM52	CGAGGAGGACCAGAACGAGG	GUGGGCACAACUUCUGCCGA	UGAAGGGUCUGCAUGGGGCU	8061039	3.92619e+06	1.28317	0.629745
ULA4	1216	F7	TRIM54	CGAGGGGAUGAACUUCACAG	AGAACAUCUCCAGGCAGAUG	CGUUGGCACAUUUGCGGCAC	8584046	3.79154e+06	1.36642	0.608147
ULA4	1216	G7	TRIM55	AUCCAUGGUCUGCUGCUCUU	AGAGAUGUUCACGAAACCUG	GCCAGUGAUAUUUUCCAGGU	7.37722e+06	3.60818e+06	1.17432	0.578738
ULA4	1216	H7	TRIM56	CCUGCAGCAUGGUUUCCCAC	CCUGGCCUGUAAAAUCUGCC	UACCUACUGCCAAGACUGCC	6.8502e+06	3.21985e+06	1.09043	0.516451
ULA4	1216	I7	TRIM58	UCAUGGCCUGGGCGCCGCCC	GAGCCGGUCAGCGUGGACUG	CGAGAAGUCGGACGGCGCGC	7985007	3.8485e+06	1.27107	0.617285
ULA4	1216	J7	TRIM59	UCAGUAAUACUUCUGCAAUU	CAUCUGGUAACUUUUAUAUA	UGAGAGCAUGGCAGUACACG	7.11028e+06	3.45052e+06	1.13183	0.55345
ULA4	1216	K7	TRIM6	AGAUGGAGCCUGAGAGAUGC	UCCUAGACAGAGUGGAGCAA	AGAAGAGGCUGAGAAUGAUC	7355755	3460414	1.1709	0.555036
ULA4	1216	L7	TRIM60	AGCCCUGGUGAACCUCCAAG	GAUCCUUCCAGGAUACACUG	UCUUGUAUGGAAAGCAAAAA	7867251	3.66438e+06	1.25232	0.587752
ULA4	1216	M7	TRIM61	AAUGGAAUUUGUUACGGCCC	AAUGGAAUUUGUUACGGCCC	AAUGGAAUUUGUUACGGCCC	7406198	3.6858e+06	1.17893	0.591188
ULA4	1216	N7	TRIM62	GCAGGAUCUGGGCUCCCUCC	GCUCGAUGUCGGUCAGCGUG	CUCGAAGGCCUCGCCGAUAG	8953352	4.01012e+06	1.42521	0.643207
ULA4	1216	O7	TRIM63	GUGUGCCAAUGACAUCUUCC	CUGGCUUGGUAAACAUCUCC	AGUCGAGCCUGAUCCAGGAU	6.53607e+06	3.20183e+06	1.04042	0.51356
ULA4	1216	B8	TRIM64B	ACCAGAUUGGUGUUGAAGUU	ACCAGAUUGGUGUUGAAGUU	ACCAGAUUGGUGUUGAAGUU	7.52039e+06	3.39249e+06	1.19711	0.544142
ULA4	1216	C8	TRIM64C	GCACACAGUCAGUGGUGACC	GCACACAGUCAGUGGUGACC	GCACACAGUCAGUGGUGACC	7.37603e+06	3.45481e+06	1.17413	0.554138
ULA4	1216	D8	TRIM65	CCCACGGGGGCUAAGUCCAC	GUGGCCUCCUCUUGGAAGAG	UGGUCUUCAUCCCACUGCAG	7967276	3.52516e+06	1.26825	0.565422
ULA4	1216	E8	TRIM67	CACCUCCCGCACCGCCGCCG	GUUGGGGGACUUGAGGCUCG	GCCGCAGCCGAGGAGCCGGG	9.19454e+06	4.28021e+06	1.4636	0.686529
ULA4	1216	F8	TRIM68	UAGAAAAAGUCCGUCUGCUA	CUGGACAGGAGCUCGACAGA	UCUGGACUCUGGGAGAUCCC	8.29431e+06	4131507	1.3203	0.662677
ULA4	1216	G8	TRIM69	ACAUCACAACUCUCUUACAU	GUGCCCUGCAGCUUGGAGCA	AUUUCCAGAAAGCUGAACCU	7285465	4.00554e+06	1.15971	0.642473
ULA4	1216	H8	TRIM7	AAUGAGAACCUGGCCCAGCU	GCCGACCCUCCUGCUCCACC	GAAACAGAUGGCAGCGGAGC	7.11599e+06	3.30096e+06	1.13274	0.529461
ULA4	1216	I8	TRIM71	CGUCGUCGGGGGGCGGCGGC	CCUCGAGGCGCACCGGCUGC	ACGGGGCAGCGCAGCUUGAG	7.18827e+06	3.78182e+06	1.14424	0.606588
ULA4	1216	J8	TRIM72	CCCGCCAUGUCGGCUGCGCC	CGGGCGCGUCGAACAGCUGC	AGAACGGUGCCAUCCGCCGC	7235819	3.51887e+06	1.15181	0.564413
ULA4	1216	K8	TRIM73	GCCGGUCCUCCAGCUCCAGC	GCCGGUCCUCCAGCUCCAGC	GCCGGUCCUCCAGCUCCAGC	7776282	3.54476e+06	1.23784	0.568565
ULA4	1216	L8	TRIM74	GCCAGUCCUCCAGCUCCAGC	GCCAGUCCUCCAGCUCCAGC	GCCAGUCCUCCAGCUCCAGC	8.03735e+06	3.59527e+06	1.2794	0.576666
ULA4	1216	M8	TRIM8	CACUGCGUGUUCUGCCGCCG	GGUGCGUCUGCACGUGGGAC	GUUGUGCUGCGGGCAGCUCC	7.38926e+06	3.83025e+06	1.17623	0.614357
ULA4	1216	N8	TRIM9	GGUCUCCGACUAUGACUAUC	UGACACAAAUUGUGAGAGCA	GAGUUGAAAUGCCCCGUGUG	7182682	3.69005e+06	1.14335	0.591869
ULA4	1216	O8	TRIML1	UCUGAUGGAGAACCUCAGGG	AGCCCAGUGACCACCGAGUG	UAUCUUGUCCUGAGUGCUGG	7.96142e+06	3.67574e+06	1.26731	0.589573
ULA4	1216	B9	TRIML2	AAAGUGUGGGGAAGGCACCU	GCGGACCUGUUCAGAAGCCC	UGCAGAGACUGGGCCGUGUG	9.34814e+06	4.36937e+06	1.48805	0.70083
ULA4	1216	C9	TRIP12	GUAUGAGCCUUGCUUGUUGA	AUGUGGCUUAUUUGUUUCUG	GUGCUAGUCCAGACUACAAC	7.16151e+06	3.5882e+06	1.13998	0.575532
ULA4	1216	D9	TRPC4AP	GUACCUGCACCGCCCGGACC	GUGGCGGCUUGGGGCGGAUG	AGGAGACAUGGCGGCGGCGC	7.92261e+06	3.76804e+06	1.26113	0.604378
ULA4	1216	E9	TRRAP	GGGGCAGGUGCUGGCGGACA	GGACUCAUCGUCGAUGUUCU	UGCAGUCCACCAGGUUCAGC	8.0546e+06	3.87263e+06	1.28215	0.621154
ULA4	1216	F9	TSG101	AUCUUCCUUAUCUACAUGAA	UUAAUAGUCAUUGAACUAGU	UCCAGUAGCCAUAGGCAUAU	7.07437e+06	3.43766e+06	1.12611	0.551386
ULA4	1216	G9	TSPAN17	CAUCUCAGCGCUGACAGAUC	GGUAGUUGGAGGCGUCAUGU	ACUCACAAACUUGAGCAGGA	7.20617e+06	3.84969e+06	1.14709	0.617475
ULA4	1216	H9	TSPO	CAUGGCGGGCACCCAGGGCG	UCCCGCUUUGUCCACGGCGA	CCUCGUGGCACCCGCCCCAC	9761760	4.16896e+06	1.55389	0.668684
ULA4	1216	I9	TSPYL5	CACCCAGGCGGCACAGGUGC	GGGUCGCGCGGGGCGUCGUC	CCACCAUGAGCGGCCGAAGU	7.71028e+06	4098556	1.22734	0.657392
ULA4	1216	J9	TTC3	CACCAUGGACAAUUUUGCUG	AGACACAAUCAUCCACGUGA	ACUGUGAUGGGGUGGUAAGU	7.4714e+06	3962767	1.18931	0.635612
ULA4	1216	K9	TTK	UUUCUUAGAAAUGGAAUCCG	GUCUCUCACUUUGUUCAUUA	AAAAUUUCUGCUGAUACUAC	7418230	3.7102e+06	1.18085	0.5951
ULA4	1216	L9	TULP4	ACCCCAGCAGAUGGAGAUGA	CGUGGUGCGUGUGGAGCACC	CAUCGCCAGCACCUUGCGUG	7.82003e+06	3.59582e+06	1.24481	0.576755
ULA4	1216	M9	U2AF2	CCCUUGCCCAGAGCGGGACA	UGCGGUCCCGGCUCCGAGAG	GGGAGGCGCUCCGCUGGUCC	7.72303e+06	3.47426e+06	1.22937	0.557257
ULA4	1216	N9	UBA1	CUAACCUGGCAGGUAUGUGU	AGGCCUGCGGGGCCUGGGCG	UGACCAGGGCACUGCCCAGU	1.00396e+07	6.05677e+06	1.59812	0.971482
ULA4	1216	O9	UBA3	ACGUUUCUCACUUCAGUGCU	GCUCGAGGAACUUCUUUACA	GCAGAAUGGCUGUUGAUGGU	7.19512e+06	4947314	1.14533	0.793529
ULA4	1216	B10	UBA5	GCGCUCCACAGACUCCGCCA	AGAGGAGUCUGCAGGUCCCG	CUGAGCUCAUCUUCUCGAUG	8950735	3.35617e+06	1.42479	0.538316
ULA4	1216	C10	UBA52	UGCAGAGUCCACCCUGCACC	UGGGCAAGCUGGCGGAGAGA	GUAUGUGUGCUCCGAUGCUU	9.64296e+06	3.15649e+06	1.53498	0.506288
ULA4	1216	D10	UBA6	AGAAGCAGAAACCCGGAGCC	GCCAGUCCCCCAGGAAGAAC	AAUGGAAGGAUCCGAGCCUG	6847228	3.70868e+06	1.08995	0.594857
ULA4	1216	E10	UBA7	GCCAGGUCGGACCAGCAGGU	GCCAAGAACUUGGUUCUGAU	UCCCAUCCACAGGUAUGUGC	7453184	3.82497e+06	1.18641	0.61351
ULA4	1216	F10	UBAC1	GGCCCGGCCUUACGUGCUUG	CUCCAGCCACUCGGCGCCGU	CGGCGGCGGGAUGUUCGUGC	7.18118e+06	3.64877e+06	1.14311	0.585249
ULA4	1216	G10	UBC	CUGGAAAACAGCUGGAAGAU	CUGGAAAACAGCUGGAAGAU	CUGGAAAACAGCUGGAAGAU	7.0586e+06	3.41574e+06	1.1236	0.547871
ULA4	1216	H10	UBD	UGUCAAUGCCAUAAGAUGAG	CUGGUCCUGCACAGGAACCU	GUCAUAUGGGUUGGCAUCAA	7274475	3.73166e+06	1.15796	0.598543
ULA4	1216	I10	UBE2A	GUCUUCCCGAAGGUUGCAGG	UGUGGAACGCGGUCAUUUUC	CCUCCGCGGGGGGCCCGCCC	6.84958e+06	3.17026e+06	1.09033	0.508496
ULA4	1216	J10	UBE2B	CUGGAUUUCCAGGUUACAAG	CAGUGGAAUGCAGUUAUAUU	UAAACAUAUAACAACUGUCU	6.94503e+06	3.56672e+06	1.10552	0.572087
ULA4	1216	K10	UBE2C	GGCGGCUGGGUCGCGGUUUU	GCCGAGCGGGGGCGCCGCCC	GCCUGCCAUGCCCUAGGCAU	9.79309e+06	4.53229e+06	1.55888	0.726961
ULA4	1216	L10	UBE2D1	CCACCUUGAUAUGCGCUAUC	UUAUCCUUUUAAACCACCAA	AAGAAUAAAAUCUCUUACAU	7.09332e+06	3440700	1.12913	0.551874
ULA4	1216	M10	UBE2D2	CCAUUGGCAAGCUACAAUAA	AAUGACAGUCCCUAUCAGGG	GUUUGAAGGGGUAAUCUGUU	6904441	3.62021e+06	1.09906	0.580667
ULA4	1216	N10	UBE2D3	UAGAGCAUUCUUGGAAGAUA	UGAGGGAAAAUACUUGCCUU	CAGAAUGACAGCCCAUAUCA	7.30654e+06	3.35393e+06	1.16307	0.537956
ULA4	1216	O10	UBE2D4	AGGAAUUAACCGACUUGCAG	UACUUACAGUCAUCACCGAC	CGCACCUGGCCUAAGUUGGG	6.90221e+06	3.32274e+06	1.09871	0.532954
ULA4	1216	B11	UBE2E1	AUUCACAGUGCUGGUCCCAA	CCCUCAUACACGGAUCCUGG	GGGAGAUUUCUUACCUUUGG	7.14748e+06	3.25863e+06	1.13775	0.522672
ULA4	1216	C11	UBE2E2	AGGAUCUAAAAUGUCCACUG	GGCUGAACUUGUUCUCUUUC	ACUAGUUGACAAUUUAGCAG	6.74588e+06	3048381	1.07382	0.488948
ULA4	1216	D11	UBE2E3	UUUCACUAACAGAAUUCAGA	AUUUCUUACCUGCAAUUAGG	CAAGAGAUUGAUGUAUUGUC	6989957	3.34761e+06	1.11267	0.536944
ULA4	1216	E11	UBE2F	AGUAAACUGAAGCGUGACGA	AGAGACAAAUUGCUUGUUAA	AAGUUUGACUGGAGAGUCUU	6.66291e+06	3.52857e+06	1.06061	0.565969
ULA4	1216	F11	UBE2G1	CACUGAAUUAAAAACUAUUU	CUUACUAAAGUGUAUCUGGA	CUCAACAAAAAUCCAGUGGA	6.58943e+06	3667512	1.04892	0.588254
ULA4	1216	G11	UBE2G2	CUUCCAAAAGCACUUACUGU	GACUUAACGGGUAAUCAAGU	ACUCAAAGCAGGUGUCUUCU	7.3769e+06	3.71131e+06	1.17427	0.595279
ULA4	1216	H11	UBE2H	GGAAAAAUCUUACAUUUCAG	AGUAGUAACAUACCUAUAGA	UUCCAUACUCCGCCUUCAUA	7556406	3.32707e+06	1.20284	0.533649
ULA4	1216	I11	UBE2I	CGCCCUCAGCAGACUCGCCC	AUGAAGCCCUCCUUACAAAU	AACCGGCCUGCGAGUCCCAC	9012495	4.48198e+06	1.43463	0.718891
ULA4	1216	J11	UBE2J1	GUUAGGAGAAUAAUGCUUGG	AUAAACUCCUCCAUCAAAAU	UUCAGGAUAACCUUUUUGAA	7.3505e+06	3.87968e+06	1.17006	0.622285
ULA4	1216	K11	UBE2J2	ACCACUCGAGAAUAUUCGAA	CCUUCGCAUUAAGAAAGACC	GAGCAGCACCAGCAGUAAGA	7.07515e+06	3.63241e+06	1.12623	0.582624
ULA4	1216	L11	UBE2K	GCCAUAUUUUAGUGAUAAAC	UGGAUAUCCUGAAAGAUCAA	GUCUUGGUAUUCAUAUGAGA	6.89535e+06	3.58324e+06	1.09761	0.574737
ULA4	1216	M11	UBE2L3	UACCUUCAUCAGCCUCCUGC	UCCUAGGCUCCGGAUCCCCG	UCCUAGGCUCCGGAUCCCCG	8013401	3.95485e+06	1.27559	0.634341
ULA4	1216	N11	UBE2L5P	AGGCCCCCUUAUUAUACGGA	AGGCCCCCUUAUUAUACGGA	AGGCCCCCUUAUUAUACGGA	7.09352e+06	3.28406e+06	1.12916	0.52675
ULA4	1216	O11	UBE2L6	UCUCACUGCUGAUGAUGGGC	UUGAUCAUGGGAGGCUUGAA	CUUUCAGGUGGUAGGGAGGU	8.32537e+06	3.80901e+06	1.32525	0.610949
ULA4	1216	B12	UBE2M	GCGCUGAGGAGGGCAUUAGA	GUUGCCCUCGAGGUCAAUGU	UCCUGGAGCCAGGUGGGCCA	9524384	6869515	1.51611	1.10184
ULA4	1216	C12	UBE2N	GGCGUUGCUCUCAUCUGGUU	AUAGGAAACCCAGCGUUUGC	AUAGGAAACCCAGCGUUUGC	7106427	2.985e+06	1.13121	0.478781
ULA4	1216	D12	UBE2O	CACCACUCGGAACUUGCUCU	AGAUCUUCUCCAGCGUCCAG	CUCUUCUUCGAUGAUUCCUA	7.3703e+06	3.47442e+06	1.17322	0.557283
ULA4	1216	E12	UBE2Q1	CAUUUAAGUAAUCUUGCCUC	UGGCAUUGGAAAAGAAAACU	AGAUCACUAUGAAAUGAAAG	8.19367e+06	4.1374e+06	1.30428	0.663623
ULA4	1216	F12	UBE2Q2	CUCGGCCUUGAGCCCUGACA	AGCGAUUCCGCAUCGUCAGU	GAGUGCGGGCUGCCCUGCUG	9156531	4498714	1.45755	0.721576
ULA4	1216	G12	UBE2QL1	UAGCGACCGCUUCAUCUCCG	GAAGCUGCACCAGGUGGACA	GAGGUUGAGCAGGAUGAACU	7567719	3.72496e+06	1.20464	0.597469
ULA4	1216	H12	UBE2R2	CGAGCUGGUCAUCUGCUGCU	GGAGGGCUUCCGGAUCACCC	CCGCCUUCGUAGAGGGUGUU	8.35358e+06	4.07397e+06	1.32974	0.653448
ULA4	1216	I12	UBE2S	AAACUCACCAGGGCCCUCGA	CCGUGCCCAGAACUCCAACG	CCGUGCCCAGAACUCCAACG	8.12388e+06	3.54553e+06	1.29317	0.568689
ULA4	1216	J12	UBE2T	UUUCAGCACAAUCUUCAAUA	GAGCUCGCAGGUCAUCCAUU	UUAGCCACAGAGCCACCCCC	9660922	4.25498e+06	1.53784	0.682481
ULA4	1216	K12	UBE2U	AUGUAAAAUGUAUUGUCAGU	ACAAUUCCGUUUCAUCCAAA	UAUAAGAAACAAGGAUAAUA	6648673	3.39708e+06	1.05835	0.544877
[truncated: 3,854 more rows]
