# Supplementary material for: Rational design of potent small molecule SMARCA2/A4(BRM/BRG1) degraders acting via the recruitment of FBXO22
Source: Research Square preprint supplement (doi:10.21203/rs.3.rs-6033426/v1), 2025-03-10
Supplement: Supplementary file 6 [file ce53cca9a7e502c34d06177a.xlsx]

## Sheet: Sheet1
Compound	SMARCA2 Kd (nM)a	SMARCA2 DC50 (nM)b	SMARCA2 Dmax (%)c	SMARCA4 DC50 (nM)b	SMARCA4 Dmax (%)c
1	98 ± 19	>10,000	--	>10,000	--
2	5.8 ± 1.1	13 ± 40	38 ± 7.1	8.2 ± 2.4	50 ± 2.4
3	5.1 ± 1.3	18 ± 25	38 ± 12	8.3 ± 5.3	43 ± 7.1
4	17 ± 2.1	16 ± 6.5	51 ± 18	15 ± 9.9	25 ± 5.9
5	4.8 ± 1.5	5.9 ± 2.1	82 ± 10	1.2 ± 0.75	99 ± 2.0
6, G-6599	29 ± 6.7	0.018 ± 0.0092	97 ± 2.0	0.056 ± 0.062	95 ± 3.0
aSMARCA2 affinity determined by NanoBRET® tracer displacement assay (HEK293 cells + digitonin)
bSMARCA2/SMARCA4 degradation potency determined by immunofluorescence (SW1573 cells, 20 h time point)
cSMARCA2/SMARCA4 maximum degradation was determined by immunofluorescence (SW1573 cells, 20 h time point)
Data are reported as an average of a minimum of 3 independent experiments, errors are reported as standard deviation
