# Supplementary material for: Rational design of potent small molecule SMARCA2/A4(BRM/BRG1) degraders acting via the recruitment of FBXO22
Source: Research Square preprint supplement (doi:10.21203/rs.3.rs-6033426/v1), 2025-03-10
Supplement: Supplementary file 7 [file d2fd478cfe24057d19d44802.xlsx]

## Sheet: Sheet1
Protein ID	Uniprot Accession	Protein description	Gene	Comparison	log2FC	SE	DF	pvalue	adj.pvalue	issue
1433B_HUMAN	P31946	14-3-3 protein beta/alpha	YWHAB	G-6599_DMSO_30min	0.0750947	0.15043	15.932	0.624461	0.944441	NA
1433B_HUMAN	P31946	14-3-3 protein beta/alpha	YWHAB	G-6599_DMSO_60min	-0.120091	0.15043	15.932	0.436424	0.980183	NA
1433E_HUMAN	P62258	14-3-3 protein epsilon	YWHAE	G-6599_DMSO_30min	-0.0108993	0.0623788	15.932	0.863495	0.978722	NA
1433E_HUMAN	P62258	14-3-3 protein epsilon	YWHAE	G-6599_DMSO_60min	0.0648653	0.0623788	15.932	0.313928	0.973968	NA
1433G_HUMAN	P61981	14-3-3 protein gamma	YWHAG	G-6599_DMSO_30min	0.0119526	0.081386	15.932	0.885082	0.983677	NA
1433G_HUMAN	P61981	14-3-3 protein gamma	YWHAG	G-6599_DMSO_60min	0.050121	0.081386	15.932	0.546696	0.983099	NA
1433S_HUMAN	P31947	14-3-3 protein sigma	SFN	G-6599_DMSO_30min	0.0546626	0.0653648	15.932	0.415371	0.906269	NA
1433S_HUMAN	P31947	14-3-3 protein sigma	SFN	G-6599_DMSO_60min	0.0972414	0.0653648	15.932	0.156362	0.940253	NA
1433T_HUMAN	P27348	14-3-3 protein theta	YWHAQ	G-6599_DMSO_30min	0.0542117	0.107132	15.932	0.619767	0.943549	NA
1433T_HUMAN	P27348	14-3-3 protein theta	YWHAQ	G-6599_DMSO_60min	-0.0315993	0.107132	15.932	0.771836	0.994708	NA
1433Z_HUMAN	P63104	14-3-3 protein zeta/delta	YWHAZ	G-6599_DMSO_30min	0.0578201	0.100547	15.932	0.573285	0.936645	NA
1433Z_HUMAN	P63104	14-3-3 protein zeta/delta	YWHAZ	G-6599_DMSO_60min	0.0321831	0.100547	15.932	0.753066	0.994708	NA
2A5A_HUMAN	Q15172	Serine/threonine-protein phosphatase 2A 56 kDa regulatory subunit alpha isoform	PPP2R5A	G-6599_DMSO_30min	-0.0518651	0.071607	15.932	0.479382	0.918454	NA
2A5A_HUMAN	Q15172	Serine/threonine-protein phosphatase 2A 56 kDa regulatory subunit alpha isoform	PPP2R5A	G-6599_DMSO_60min	-0.0241365	0.071607	15.932	0.740465	0.993608	NA
2A5B_HUMAN	Q15173	Serine/threonine-protein phosphatase 2A 56 kDa regulatory subunit beta isoform	PPP2R5B	G-6599_DMSO_30min	0.0376417	0.0844729	15.932	0.661877	0.948027	NA
2A5B_HUMAN	Q15173	Serine/threonine-protein phosphatase 2A 56 kDa regulatory subunit beta isoform	PPP2R5B	G-6599_DMSO_60min	0.0758092	0.0844729	15.932	0.382847	0.973968	NA
2A5D_HUMAN	Q14738	Serine/threonine-protein phosphatase 2A 56 kDa regulatory subunit delta isoform	PPP2R5D	G-6599_DMSO_60min	0.105141	0.103854	15.932	0.32648	0.973968	NA
2A5D_HUMAN	Q14738	Serine/threonine-protein phosphatase 2A 56 kDa regulatory subunit delta isoform	PPP2R5D	G-6599_DMSO_30min	-0.0504471	0.103854	15.932	0.633756	0.944526	NA
2A5E_HUMAN	Q16537	Serine/threonine-protein phosphatase 2A 56 kDa regulatory subunit epsilon isoform	PPP2R5E	G-6599_DMSO_30min	-0.180143	0.101158	15.932	0.0940194	0.787433	NA
2A5E_HUMAN	Q16537	Serine/threonine-protein phosphatase 2A 56 kDa regulatory subunit epsilon isoform	PPP2R5E	G-6599_DMSO_60min	-0.00767369	0.101158	15.932	0.940476	0.996995	NA
2A5G_HUMAN	Q13362	Serine/threonine-protein phosphatase 2A 56 kDa regulatory subunit gamma isoform	PPP2R5C	G-6599_DMSO_30min	0.0246309	0.050253	15.932	0.630718	0.944526	NA
2A5G_HUMAN	Q13362	Serine/threonine-protein phosphatase 2A 56 kDa regulatory subunit gamma isoform	PPP2R5C	G-6599_DMSO_60min	0.0277503	0.050253	15.932	0.588467	0.986136	NA
2A5G_HUMAN	Q13362-2	Serine/threonine-protein phosphatase 2A 56 kDa regulatory subunit gamma isoform (isoform 2)	PPP2R5C	G-6599_DMSO_60min	-0.0140018	0.062327	15.932	0.825107	0.994708	NA
2A5G_HUMAN	Q13362-2	Serine/threonine-protein phosphatase 2A 56 kDa regulatory subunit gamma isoform (isoform 2)	PPP2R5C	G-6599_DMSO_30min	0.0163449	0.062327	15.932	0.796494	0.968386	NA
2AAA_HUMAN	P30153	Serine/threonine-protein phosphatase 2A 65 kDa regulatory subunit A alpha isoform	PPP2R1A	G-6599_DMSO_30min	-0.0051402	0.109982	15.932	0.963304	0.99348	NA
2AAA_HUMAN	P30153	Serine/threonine-protein phosphatase 2A 65 kDa regulatory subunit A alpha isoform	PPP2R1A	G-6599_DMSO_60min	0.0525466	0.109982	15.932	0.6393	0.986136	NA
2AAB_HUMAN	P30154	Serine/threonine-protein phosphatase 2A 65 kDa regulatory subunit A beta isoform	PPP2R1B	G-6599_DMSO_60min	-0.03474	0.0663309	15.932	0.60767	0.986136	NA
2AAB_HUMAN	P30154	Serine/threonine-protein phosphatase 2A 65 kDa regulatory subunit A beta isoform	PPP2R1B	G-6599_DMSO_30min	-0.0312954	0.0663309	15.932	0.643461	0.944526	NA
2ABA_HUMAN	P63151	Serine/threonine-protein phosphatase 2A 55 kDa regulatory subunit B alpha isoform	PPP2R2A	G-6599_DMSO_60min	0.0719259	0.0763382	15.932	0.360159	0.973968	NA
2ABA_HUMAN	P63151	Serine/threonine-protein phosphatase 2A 55 kDa regulatory subunit B alpha isoform	PPP2R2A	G-6599_DMSO_30min	-0.0570529	0.0763382	15.932	0.465729	0.914426	NA
2ABD_HUMAN	Q66LE6	Serine/threonine-protein phosphatase 2A 55 kDa regulatory subunit B delta isoform	PPP2R2D	G-6599_DMSO_60min	0.018782	0.0756087	15.932	0.80699	0.994708	NA
2ABD_HUMAN	Q66LE6	Serine/threonine-protein phosphatase 2A 55 kDa regulatory subunit B delta isoform	PPP2R2D	G-6599_DMSO_30min	-0.0681267	0.0756087	15.932	0.380985	0.897326	NA
3BHS7_HUMAN	Q9H2F3	3 beta-hydroxysteroid dehydrogenase type 7	HSD3B7	G-6599_DMSO_30min	0.157648	0.14131	15.932	0.281131	0.870404	NA
3BHS7_HUMAN	Q9H2F3	3 beta-hydroxysteroid dehydrogenase type 7	HSD3B7	G-6599_DMSO_60min	0.0742631	0.14131	15.932	0.606451	0.986136	NA
3BP5_HUMAN	O60239	SH3 domain-binding protein 5	SH3BP5	G-6599_DMSO_30min	-0.0774427	0.105574	15.932	0.473888	0.917401	NA
3BP5_HUMAN	O60239	SH3 domain-binding protein 5	SH3BP5	G-6599_DMSO_60min	0.154096	0.105574	15.932	0.163837	0.945313	NA
3BP5L_HUMAN	Q7L8J4	SH3 domain-binding protein 5-like	SH3BP5L	G-6599_DMSO_30min	-0.166859	0.225427	15.932	0.469953	0.916021	NA
3BP5L_HUMAN	Q7L8J4	SH3 domain-binding protein 5-like	SH3BP5L	G-6599_DMSO_60min	-0.0237656	0.225427	15.932	0.917355	0.996995	NA
3HIDH_HUMAN	P31937	3-hydroxyisobutyrate dehydrogenase, mitochondrial	HIBADH	G-6599_DMSO_60min	-0.197658	0.18461	15.932	0.300265	0.973968	NA
3HIDH_HUMAN	P31937	3-hydroxyisobutyrate dehydrogenase, mitochondrial	HIBADH	G-6599_DMSO_30min	-0.105731	0.18461	15.932	0.574825	0.936645	NA
3MG_HUMAN	P29372	DNA-3-methyladenine glycosylase	MPG	G-6599_DMSO_30min	0.0859667	0.0757349	15.932	0.273122	0.870404	NA
3MG_HUMAN	P29372	DNA-3-methyladenine glycosylase	MPG	G-6599_DMSO_60min	-0.0125434	0.0757349	15.932	0.870537	0.996127	NA
4EBP2_HUMAN	Q13542	Eukaryotic translation initiation factor 4E-binding protein 2	EIF4EBP2	G-6599_DMSO_60min	-0.0213534	0.119725	15.932	0.860693	0.996127	NA
4EBP2_HUMAN	Q13542	Eukaryotic translation initiation factor 4E-binding protein 2	EIF4EBP2	G-6599_DMSO_30min	-0.0459575	0.119725	15.932	0.706157	0.955538	NA
4ET_HUMAN	Q9NRA8	Eukaryotic translation initiation factor 4E transporter	EIF4ENIF1	G-6599_DMSO_30min	0.00136385	0.0570347	15.932	0.981219	0.996289	NA
4ET_HUMAN	Q9NRA8	Eukaryotic translation initiation factor 4E transporter	EIF4ENIF1	G-6599_DMSO_60min	0.0584256	0.0570347	15.932	0.320955	0.973968	NA
4F2_HUMAN	P08195	4F2 cell-surface antigen heavy chain	SLC3A2	G-6599_DMSO_30min	0.0221559	0.104505	15.932	0.834789	0.972552	NA
4F2_HUMAN	P08195	4F2 cell-surface antigen heavy chain	SLC3A2	G-6599_DMSO_60min	-0.0278134	0.104505	15.932	0.793542	0.994708	NA
4F2_HUMAN	P08195-3	4F2 cell-surface antigen heavy chain (isoform 3)	SLC3A2	G-6599_DMSO_30min	0.327082	0.121313	15.932	0.0159393	0.58836	NA
4F2_HUMAN	P08195-3	4F2 cell-surface antigen heavy chain (isoform 3)	SLC3A2	G-6599_DMSO_60min	0.110139	0.121313	15.932	0.377464	0.973968	NA
5MP1_HUMAN	Q9Y6E2	NA	NA	G-6599_DMSO_30min	-0.0908792	0.0951236	15.932	0.353658	0.891233	NA
5MP1_HUMAN	Q9Y6E2	NA	NA	G-6599_DMSO_60min	0.0941834	0.0951236	15.932	0.336917	0.973968	NA
5MP2_HUMAN	Q7L1Q6	NA	NA	G-6599_DMSO_30min	-0.101316	0.106413	15.932	0.355264	0.891233	NA
5MP2_HUMAN	Q7L1Q6	NA	NA	G-6599_DMSO_60min	0.0780693	0.106413	15.932	0.473823	0.982773	NA
5NT3A_HUMAN	Q9H0P0	Cytosolic 5'-nucleotidase 3A	NT5C3A	G-6599_DMSO_30min	-0.0773229	0.070661	15.932	0.290101	0.870404	NA
5NT3A_HUMAN	Q9H0P0	Cytosolic 5'-nucleotidase 3A	NT5C3A	G-6599_DMSO_60min	-0.0720942	0.070661	15.932	0.322838	0.973968	NA
5NT3B_HUMAN	Q969T7	7-methylguanosine phosphate-specific 5'-nucleotidase	NT5C3B	G-6599_DMSO_30min	-0.0741192	0.0904795	15.932	0.424767	0.906929	NA
5NT3B_HUMAN	Q969T7	7-methylguanosine phosphate-specific 5'-nucleotidase	NT5C3B	G-6599_DMSO_60min	0.0484523	0.0904795	15.932	0.599696	0.986136	NA
5NTC_HUMAN	P49902	Cytosolic purine 5'-nucleotidase	NT5C2	G-6599_DMSO_60min	-0.0484746	0.0643965	15.932	0.462578	0.982449	NA
5NTC_HUMAN	P49902	Cytosolic purine 5'-nucleotidase	NT5C2	G-6599_DMSO_30min	-0.0501031	0.0643965	15.932	0.447946	0.909483	NA
5NTD_HUMAN	P21589	5'-nucleotidase	NT5E	G-6599_DMSO_30min	0.0320741	0.0970108	15.932	0.745236	0.958559	NA
5NTD_HUMAN	P21589	5'-nucleotidase	NT5E	G-6599_DMSO_60min	0.240926	0.0970108	15.932	0.0245267	0.89355	NA
6PGD_HUMAN	P52209	6-phosphogluconate dehydrogenase, decarboxylating	PGD	G-6599_DMSO_60min	0.0974013	0.0730578	15.932	0.201214	0.957205	NA
6PGD_HUMAN	P52209	6-phosphogluconate dehydrogenase, decarboxylating	PGD	G-6599_DMSO_30min	0.0582848	0.0730578	15.932	0.436722	0.908838	NA
6PGL_HUMAN	O95336	6-phosphogluconolactonase	PGLS	G-6599_DMSO_30min	0.0533465	0.0820988	15.932	0.52509	0.925295	NA
6PGL_HUMAN	O95336	6-phosphogluconolactonase	PGLS	G-6599_DMSO_60min	-0.0260274	0.0820988	15.932	0.755341	0.994708	NA
8ODP_HUMAN	P36639	7,8-dihydro-8-oxoguanine triphosphatase	NUDT1	G-6599_DMSO_60min	0.354441	0.13863	15.932	0.0211636	0.89355	NA
8ODP_HUMAN	P36639	7,8-dihydro-8-oxoguanine triphosphatase	NUDT1	G-6599_DMSO_30min	-0.268769	0.13863	15.932	0.0704554	0.743939	NA
A0A024R0F6_HUMAN	A0A024R0F6	Tripartite motif-containing 33, isoform CRA_a	TRIM33	G-6599_DMSO_30min	0.0302868	0.15573	15.932	0.848256	0.974654	NA
A0A024R0F6_HUMAN	A0A024R0F6	Tripartite motif-containing 33, isoform CRA_a	TRIM33	G-6599_DMSO_60min	0.298052	0.15573	15.932	0.0737712	0.907189	NA
A0A024R8W1_HUMAN	A0A024R8W1	Chromosome 17 open reading frame 70, isoform CRA_a	C17orf70	G-6599_DMSO_60min	0.00737122	0.0877229	15.932	0.934081	0.996995	NA
A0A024R8W1_HUMAN	A0A024R8W1	Chromosome 17 open reading frame 70, isoform CRA_a	C17orf70	G-6599_DMSO_30min	0.107845	0.0877229	15.932	0.236775	0.864581	NA
A0A024RAN2_HUMAN	A0A024RAN2	Calpastatin, isoform CRA_a	CAST	G-6599_DMSO_30min	-0.228391	0.151948	15.932	0.152379	0.833394	NA
A0A024RAN2_HUMAN	A0A024RAN2	Calpastatin, isoform CRA_a	CAST	G-6599_DMSO_60min	0.0370372	0.151948	15.932	0.810536	0.994708	NA
A0A0A0MSA7_HUMAN	A0A0A0MSA7	Eukaryotic translation initiation factor 4 gamma 3	EIF4G3	G-6599_DMSO_30min	-0.300996	0.0868339	15.932	0.00319893	0.336547	NA
A0A0A0MSA7_HUMAN	A0A0A0MSA7	Eukaryotic translation initiation factor 4 gamma 3	EIF4G3	G-6599_DMSO_60min	0.129351	0.0868339	15.932	0.15585	0.939342	NA
A0A0F7G8J1_HUMAN	A0A0F7G8J1	NA	NA	G-6599_DMSO_30min	0.0849763	0.338479	15.932	0.804982	0.968599	NA
A0A0F7G8J1_HUMAN	A0A0F7G8J1	NA	NA	G-6599_DMSO_60min	-0.0168931	0.338479	15.932	0.960815	0.997895	NA
A0A0S2Z377_HUMAN	A0A0S2Z377	NA	NA	G-6599_DMSO_30min	0.0792593	0.102219	15.932	0.449468	0.909592	NA
A0A0S2Z377_HUMAN	A0A0S2Z377	NA	NA	G-6599_DMSO_60min	0.0499209	0.102219	15.932	0.631941	0.986136	NA
A0A1B0GVL4_HUMAN	A0A1B0GVL4	NA	NA	G-6599_DMSO_30min	-0.081442	0.165966	15.932	0.630318	0.944526	NA
A0A1B0GVL4_HUMAN	A0A1B0GVL4	NA	NA	G-6599_DMSO_60min	0.0504591	0.165966	15.932	0.765038	0.994708	NA
A0A1U9X7W4_HUMAN	A0A1U9X7W4	NA	NA	G-6599_DMSO_30min	0.000373325	0.166614	15.932	0.99824	0.999742	NA
A0A1U9X7W4_HUMAN	A0A1U9X7W4	NA	NA	G-6599_DMSO_60min	0.0397387	0.166614	15.932	0.814528	0.994708	NA
A0A3B3IRW6_HUMAN	A0A3B3IRW6	NA	NA	G-6599_DMSO_30min	0.0960328	0.105071	15.932	0.374351	0.893483	NA
A0A3B3IRW6_HUMAN	A0A3B3IRW6	NA	NA	G-6599_DMSO_60min	0.0859449	0.105071	15.932	0.425438	0.979629	NA
A0A494BZV2_HUMAN	A0A494BZV2	NA	NA	G-6599_DMSO_30min	0.0982461	0.0800714	15.932	0.237653	0.865274	NA
A0A494BZV2_HUMAN	A0A494BZV2	NA	NA	G-6599_DMSO_60min	-0.00827887	0.0800714	15.932	0.918941	0.996995	NA
A0A590UJR0_HUMAN	A0A590UJR0	NA	NA	G-6599_DMSO_30min	2.80374e-05	0.280768	15.932	0.999922	0.999922	NA
A0A590UJR0_HUMAN	A0A590UJR0	NA	NA	G-6599_DMSO_60min	0.196026	0.280768	15.932	0.49513	0.983099	NA
A0A7I2V2T3_HUMAN	A0A7I2V2T3	NA	NA	G-6599_DMSO_30min	0.073328	0.208172	15.932	0.729269	0.957689	NA
A0A7I2V2T3_HUMAN	A0A7I2V2T3	NA	NA	G-6599_DMSO_60min	-0.156721	0.208172	15.932	0.462524	0.982449	NA
A0A7I2V661_HUMAN	A0A7I2V661	NA	NA	G-6599_DMSO_30min	-1.05751	0.414641	15.932	0.0214352	0.623793	NA
A0A7I2V661_HUMAN	A0A7I2V661	NA	NA	G-6599_DMSO_60min	0.0940232	0.414641	15.932	0.823496	0.994708	NA
A16A1_HUMAN	Q8IZ83	Aldehyde dehydrogenase family 16 member A1	ALDH16A1	G-6599_DMSO_30min	-0.0503264	0.0656711	15.932	0.45468	0.910237	NA
A16A1_HUMAN	Q8IZ83	Aldehyde dehydrogenase family 16 member A1	ALDH16A1	G-6599_DMSO_60min	0.0298539	0.0656711	15.932	0.655531	0.986136	NA
A16L1_HUMAN	Q676U5	Autophagy-related protein 16-1	ATG16L1	G-6599_DMSO_60min	0.102001	0.113995	15.932	0.384225	0.973968	NA
A16L1_HUMAN	Q676U5	Autophagy-related protein 16-1	ATG16L1	G-6599_DMSO_30min	0.00813109	0.113995	15.932	0.944024	0.991979	NA
A2012_HUMAN	Q8NF67	Putative ankyrin repeat domain-containing protein 20A12 pseudogene	ANKRD20A12P	G-6599_DMSO_60min	0.192385	0.0910898	15.932	0.0508304	0.907189	NA
A2012_HUMAN	Q8NF67	Putative ankyrin repeat domain-containing protein 20A12 pseudogene	ANKRD20A12P	G-6599_DMSO_30min	-0.0246202	0.0910898	15.932	0.790411	0.965967	NA
A2MG_HUMAN	P01023	Alpha-2-macroglobulin	A2M	G-6599_DMSO_30min	0.602286	0.213144	15.932	0.0122154	0.563628	NA
A2MG_HUMAN	P01023	Alpha-2-macroglobulin	A2M	G-6599_DMSO_60min	-0.00530266	0.213144	15.932	0.980461	0.99975	NA
A2VCL3_HUMAN	A2VCL3	COG4 protein	COG4	G-6599_DMSO_30min	0.0558634	0.147399	15.932	0.709696	0.956065	NA
A2VCL3_HUMAN	A2VCL3	COG4 protein	COG4	G-6599_DMSO_60min	0.0993995	0.147399	15.932	0.509753	0.983099	NA
A4_HUMAN	P05067	Amyloid beta A4 protein	APP	G-6599_DMSO_30min	0.111038	0.0852706	15.932	0.211364	0.850467	NA
A4_HUMAN	P05067	Amyloid beta A4 protein	APP	G-6599_DMSO_60min	0.0914188	0.0852706	15.932	0.299646	0.973968	NA
A7BI36_HUMAN	A7BI36	p180/ribosome receptor	RRBP1	G-6599_DMSO_60min	0.14485	0.17221	15.932	0.412724	0.977137	NA
A7BI36_HUMAN	A7BI36	p180/ribosome receptor	RRBP1	G-6599_DMSO_30min	0.0268189	0.17221	15.932	0.878199	0.981595	NA
A7L3B_HUMAN	Q96GX2	Putative ataxin-7-like protein 3B	ATXN7L3B	G-6599_DMSO_30min	-0.0831403	0.0878134	15.932	0.357889	0.891285	NA
A7L3B_HUMAN	Q96GX2	Putative ataxin-7-like protein 3B	ATXN7L3B	G-6599_DMSO_60min	0.195917	0.0878134	15.932	0.040402	0.907189	NA
AAAS_HUMAN	Q9NRG9	Aladin	AAAS	G-6599_DMSO_60min	-0.0334756	0.0842343	15.932	0.696339	0.988501	NA
AAAS_HUMAN	Q9NRG9	Aladin	AAAS	G-6599_DMSO_30min	0.0659824	0.0842343	15.932	0.444928	0.909483	NA
AAAT_HUMAN	Q15758	Neutral amino acid transporter B(0)	SLC1A5	G-6599_DMSO_30min	0.118838	0.0956931	15.932	0.232259	0.861357	NA
AAAT_HUMAN	Q15758	Neutral amino acid transporter B(0)	SLC1A5	G-6599_DMSO_60min	0.0492319	0.0956931	15.932	0.613981	0.986136	NA
AACS_HUMAN	Q86V21	Acetoacetyl-CoA synthetase	AACS	G-6599_DMSO_30min	-0.0336017	0.0631655	15.932	0.602092	0.940895	NA
AACS_HUMAN	Q86V21	Acetoacetyl-CoA synthetase	AACS	G-6599_DMSO_60min	0.124754	0.0631655	15.932	0.0658546	0.907189	NA
AAGAB_HUMAN	Q6PD74	Alpha- and gamma-adaptin-binding protein p34	AAGAB	G-6599_DMSO_60min	0.0627048	0.0795527	15.932	0.442141	0.980183	NA
AAGAB_HUMAN	Q6PD74	Alpha- and gamma-adaptin-binding protein p34	AAGAB	G-6599_DMSO_30min	-0.101032	0.0795527	15.932	0.22232	0.857717	NA
AAK1_HUMAN	Q2M2I8	AP2-associated protein kinase 1	AAK1	G-6599_DMSO_60min	0.0521865	0.10179	15.932	0.615204	0.986136	NA
AAK1_HUMAN	Q2M2I8	AP2-associated protein kinase 1	AAK1	G-6599_DMSO_30min	-0.0948503	0.10179	15.932	0.365334	0.893483	NA
AAKB1_HUMAN	Q9Y478	5'-AMP-activated protein kinase subunit beta-1	PRKAB1	G-6599_DMSO_30min	-0.0894986	0.109379	15.932	0.425286	0.906929	NA
AAKB1_HUMAN	Q9Y478	5'-AMP-activated protein kinase subunit beta-1	PRKAB1	G-6599_DMSO_60min	-0.0213741	0.109379	15.932	0.847539	0.994708	NA
AAKB2_HUMAN	O43741	5'-AMP-activated protein kinase subunit beta-2	PRKAB2	G-6599_DMSO_30min	-0.0772471	0.064556	15.932	0.248969	0.869553	NA
AAKB2_HUMAN	O43741	5'-AMP-activated protein kinase subunit beta-2	PRKAB2	G-6599_DMSO_60min	0.0180731	0.064556	15.932	0.783111	0.994708	NA
AAKG1_HUMAN	P54619	5'-AMP-activated protein kinase subunit gamma-1	PRKAG1	G-6599_DMSO_30min	-0.041429	0.0672104	15.932	0.546334	0.930884	NA
AAKG1_HUMAN	P54619	5'-AMP-activated protein kinase subunit gamma-1	PRKAG1	G-6599_DMSO_60min	0.00709742	0.0672104	15.932	0.917218	0.996995	NA
AAKG2_HUMAN	Q9UGJ0	5'-AMP-activated protein kinase subunit gamma-2	PRKAG2	G-6599_DMSO_60min	-0.0253213	0.0560692	15.932	0.657639	0.986136	NA
AAKG2_HUMAN	Q9UGJ0	5'-AMP-activated protein kinase subunit gamma-2	PRKAG2	G-6599_DMSO_30min	0.0460992	0.0560692	15.932	0.423107	0.906929	NA
AAMDC_HUMAN	Q9H7C9	Mth938 domain-containing protein	AAMDC	G-6599_DMSO_60min	0.171554	0.0865111	15.932	0.0648775	0.907189	NA
AAMDC_HUMAN	Q9H7C9	Mth938 domain-containing protein	AAMDC	G-6599_DMSO_30min	-0.181573	0.0865111	15.932	0.0521265	0.734163	NA
AAMP_HUMAN	Q13685	Angio-associated migratory cell protein	AAMP	G-6599_DMSO_30min	0.109092	0.0890139	15.932	0.238175	0.865601	NA
AAMP_HUMAN	Q13685	Angio-associated migratory cell protein	AAMP	G-6599_DMSO_60min	-0.0235836	0.0890139	15.932	0.794451	0.994708	NA
AAPK1_HUMAN	Q13131	5'-AMP-activated protein kinase catalytic subunit alpha-1	PRKAA1	G-6599_DMSO_60min	0.0636726	0.0843596	15.932	0.461396	0.982449	NA
AAPK1_HUMAN	Q13131	5'-AMP-activated protein kinase catalytic subunit alpha-1	PRKAA1	G-6599_DMSO_30min	-0.0420448	0.0843596	15.932	0.625013	0.944441	NA
AAPK2_HUMAN	P54646	5'-AMP-activated protein kinase catalytic subunit alpha-2	PRKAA2	G-6599_DMSO_60min	0.00882131	0.0889883	15.932	0.922273	0.996995	NA
AAPK2_HUMAN	P54646	5'-AMP-activated protein kinase catalytic subunit alpha-2	PRKAA2	G-6599_DMSO_30min	0.0848286	0.0889883	15.932	0.354701	0.891233	NA
AAR2_HUMAN	Q9Y312	Protein AAR2 homolog	AAR2	G-6599_DMSO_30min	0.138497	0.0870721	15.932	0.131344	0.822317	NA
AAR2_HUMAN	Q9Y312	Protein AAR2 homolog	AAR2	G-6599_DMSO_60min	-0.102066	0.0870721	15.932	0.258346	0.957205	NA
AASD1_HUMAN	Q9BTE6	Alanyl-tRNA editing protein Aarsd1	AARSD1	G-6599_DMSO_60min	-0.0148377	0.0659885	15.932	0.824953	0.994708	NA
AASD1_HUMAN	Q9BTE6	Alanyl-tRNA editing protein Aarsd1	AARSD1	G-6599_DMSO_30min	-0.200465	0.0659885	15.932	0.0078647	0.502739	NA
AATC_HUMAN	P17174	Aspartate aminotransferase, cytoplasmic	GOT1	G-6599_DMSO_60min	0.0628226	0.083624	15.932	0.463455	0.982449	NA
AATC_HUMAN	P17174	Aspartate aminotransferase, cytoplasmic	GOT1	G-6599_DMSO_30min	-0.085166	0.083624	15.932	0.323687	0.879613	NA
AATF_HUMAN	Q9NY61	Protein AATF	AATF	G-6599_DMSO_60min	0.0437056	0.0800815	15.932	0.592788	0.986136	NA
AATF_HUMAN	Q9NY61	Protein AATF	AATF	G-6599_DMSO_30min	0.0323177	0.0800815	15.932	0.691901	0.954957	NA
AATM_HUMAN	P00505	Aspartate aminotransferase, mitochondrial	GOT2	G-6599_DMSO_30min	0.0742079	0.207306	15.932	0.725069	0.957689	NA
AATM_HUMAN	P00505	Aspartate aminotransferase, mitochondrial	GOT2	G-6599_DMSO_60min	0.16703	0.207306	15.932	0.432269	0.980183	NA
AB17B_HUMAN	Q5VST6	Alpha/beta hydrolase domain-containing protein 17B	ABHD17B	G-6599_DMSO_30min	0.0374897	0.0882484	15.932	0.676649	0.952404	NA
AB17B_HUMAN	Q5VST6	Alpha/beta hydrolase domain-containing protein 17B	ABHD17B	G-6599_DMSO_60min	0.036253	0.0882484	15.932	0.686687	0.987189	NA
AB17C_HUMAN	Q6PCB6	Alpha/beta hydrolase domain-containing protein 17C	ABHD17C	G-6599_DMSO_30min	0.175948	0.0720129	15.932	0.0265825	0.643982	NA
AB17C_HUMAN	Q6PCB6	Alpha/beta hydrolase domain-containing protein 17C	ABHD17C	G-6599_DMSO_60min	0.0522718	0.0720129	15.932	0.478448	0.982773	NA
ABC3B_HUMAN	Q9UH17	DNA dC->dU-editing enzyme APOBEC-3B	APOBEC3B	G-6599_DMSO_30min	-0.0603441	0.05483	15.932	0.287436	0.870404	NA
ABC3B_HUMAN	Q9UH17	DNA dC->dU-editing enzyme APOBEC-3B	APOBEC3B	G-6599_DMSO_60min	-0.000578201	0.05483	15.932	0.991717	0.99975	NA
ABC3C_HUMAN	Q9NRW3	DNA dC->dU-editing enzyme APOBEC-3C	APOBEC3C	G-6599_DMSO_60min	0.292466	0.12587	15.932	0.033709	0.907189	NA
ABC3C_HUMAN	Q9NRW3	DNA dC->dU-editing enzyme APOBEC-3C	APOBEC3C	G-6599_DMSO_30min	0.137602	0.12587	15.932	0.290556	0.870404	NA
ABC3F_HUMAN	Q8IUX4	DNA dC->dU-editing enzyme APOBEC-3F	APOBEC3F	G-6599_DMSO_60min	0.177537	0.0556527	15.932	0.00571978	0.556825	NA
ABC3F_HUMAN	Q8IUX4	DNA dC->dU-editing enzyme APOBEC-3F	APOBEC3F	G-6599_DMSO_30min	0.0503974	0.0556527	15.932	0.378655	0.89573	NA
ABCA2_HUMAN	Q9BZC7	ATP-binding cassette sub-family A member 2	ABCA2	G-6599_DMSO_30min	0.100557	0.0774999	15.932	0.212929	0.850467	NA
ABCA2_HUMAN	Q9BZC7	ATP-binding cassette sub-family A member 2	ABCA2	G-6599_DMSO_60min	-0.0036907	0.0774999	15.932	0.962609	0.997895	NA
ABCA3_HUMAN	Q99758	ATP-binding cassette sub-family A member 3	ABCA3	G-6599_DMSO_30min	0.0824614	0.0796656	15.932	0.316082	0.87744	NA
ABCA3_HUMAN	Q99758	ATP-binding cassette sub-family A member 3	ABCA3	G-6599_DMSO_60min	0.0925386	0.0796656	15.932	0.26251	0.957205	NA
ABCAD_HUMAN	Q86UQ4	ATP-binding cassette sub-family A member 13	ABCA13	G-6599_DMSO_60min	-0.159716	0.150149	15.932	0.303316	0.973968	NA
ABCAD_HUMAN	Q86UQ4	ATP-binding cassette sub-family A member 13	ABCA13	G-6599_DMSO_30min	-0.0347206	0.150149	15.932	0.820071	0.970424	NA
ABCB6_HUMAN	Q9NP58	ATP-binding cassette sub-family B member 6, mitochondrial	ABCB6	G-6599_DMSO_30min	0.0606735	0.152175	15.932	0.695401	0.955538	NA
ABCB6_HUMAN	Q9NP58	ATP-binding cassette sub-family B member 6, mitochondrial	ABCB6	G-6599_DMSO_60min	0.0590344	0.152175	15.932	0.703197	0.988501	NA
ABCB7_HUMAN	O75027	ATP-binding cassette sub-family B member 7, mitochondrial	ABCB7	G-6599_DMSO_30min	-0.122578	0.163246	15.932	0.463673	0.913546	NA
ABCB7_HUMAN	O75027	ATP-binding cassette sub-family B member 7, mitochondrial	ABCB7	G-6599_DMSO_60min	-0.187357	0.163246	15.932	0.268035	0.95835	NA
ABCBA_HUMAN	Q9NRK6	ATP-binding cassette sub-family B member 10, mitochondrial	ABCB10	G-6599_DMSO_60min	-0.177015	0.108005	15.932	0.120818	0.934825	NA
ABCBA_HUMAN	Q9NRK6	ATP-binding cassette sub-family B member 10, mitochondrial	ABCB10	G-6599_DMSO_30min	0.0325984	0.108005	15.932	0.766692	0.958662	NA
ABCC8_HUMAN	Q09428	ATP-binding cassette sub-family C member 8	ABCC8	G-6599_DMSO_30min	0.145123	0.102121	15.932	0.174568	0.834008	NA
ABCC8_HUMAN	Q09428	ATP-binding cassette sub-family C member 8	ABCC8	G-6599_DMSO_60min	-0.0893107	0.102121	15.932	0.394808	0.973968	NA
ABCD1_HUMAN	P33897	ATP-binding cassette sub-family D member 1	ABCD1	G-6599_DMSO_30min	0.243282	0.0765054	15.932	0.00584288	0.427786	NA
ABCD1_HUMAN	P33897	ATP-binding cassette sub-family D member 1	ABCD1	G-6599_DMSO_60min	0.0993611	0.0765054	15.932	0.212515	0.957205	NA
ABCD3_HUMAN	P28288	ATP-binding cassette sub-family D member 3	ABCD3	G-6599_DMSO_60min	0.0302863	0.0670998	15.932	0.657812	0.986136	NA
ABCD3_HUMAN	P28288	ATP-binding cassette sub-family D member 3	ABCD3	G-6599_DMSO_30min	0.0867131	0.0670998	15.932	0.214683	0.852115	NA
ABCD4_HUMAN	O14678	ATP-binding cassette sub-family D member 4	ABCD4	G-6599_DMSO_60min	-0.157207	0.13777	15.932	0.270696	0.960319	NA
ABCD4_HUMAN	O14678	ATP-binding cassette sub-family D member 4	ABCD4	G-6599_DMSO_30min	0.224547	0.13777	15.932	0.122736	0.813489	NA
ABCF1_HUMAN	Q8NE71	ATP-binding cassette sub-family F member 1	ABCF1	G-6599_DMSO_30min	-0.0389324	0.0674523	15.932	0.571881	0.936645	NA
ABCF1_HUMAN	Q8NE71	ATP-binding cassette sub-family F member 1	ABCF1	G-6599_DMSO_60min	0.0447221	0.0674523	15.932	0.516797	0.983099	NA
ABCF2_HUMAN	Q9UG63	ATP-binding cassette sub-family F member 2	ABCF2	G-6599_DMSO_60min	0.00154198	0.0949501	15.932	0.987245	0.99975	NA
ABCF2_HUMAN	Q9UG63	ATP-binding cassette sub-family F member 2	ABCF2	G-6599_DMSO_30min	-0.179463	0.0949501	15.932	0.0770819	0.755398	NA
ABCF3_HUMAN	Q9NUQ8	ATP-binding cassette sub-family F member 3	ABCF3	G-6599_DMSO_30min	-0.03064	0.0884851	15.932	0.733669	0.958559	NA
ABCF3_HUMAN	Q9NUQ8	ATP-binding cassette sub-family F member 3	ABCF3	G-6599_DMSO_60min	-0.016762	0.0884851	15.932	0.852145	0.994708	NA
ABD12_HUMAN	Q8N2K0	Monoacylglycerol lipase ABHD12	ABHD12	G-6599_DMSO_60min	-0.128203	0.094671	15.932	0.19457	0.957205	NA
ABD12_HUMAN	Q8N2K0	Monoacylglycerol lipase ABHD12	ABHD12	G-6599_DMSO_30min	0.115269	0.094671	15.932	0.241114	0.86791	NA
ABH15_HUMAN	Q6UXT9	Abhydrolase domain-containing protein 15	ABHD15	G-6599_DMSO_30min	0.131352	0.0809545	15.932	0.124305	0.813489	NA
ABH15_HUMAN	Q6UXT9	Abhydrolase domain-containing protein 15	ABHD15	G-6599_DMSO_60min	0.023151	0.0809545	15.932	0.778582	0.994708	NA
ABHD4_HUMAN	Q8TB40	Abhydrolase domain-containing protein 4	ABHD4	G-6599_DMSO_30min	-0.0072978	0.0862362	15.932	0.933613	0.989968	NA
ABHD4_HUMAN	Q8TB40	Abhydrolase domain-containing protein 4	ABHD4	G-6599_DMSO_60min	0.0556891	0.0862362	15.932	0.527618	0.983099	NA
ABHD5_HUMAN	Q8WTS1	1-acylglycerol-3-phosphate O-acyltransferase ABHD5	ABHD5	G-6599_DMSO_30min	0.0302589	0.0808662	15.932	0.7132	0.956976	NA
ABHD5_HUMAN	Q8WTS1	1-acylglycerol-3-phosphate O-acyltransferase ABHD5	ABHD5	G-6599_DMSO_60min	0.148037	0.0808662	15.932	0.0859227	0.920526	NA
ABHD6_HUMAN	Q9BV23	Monoacylglycerol lipase ABHD6	ABHD6	G-6599_DMSO_60min	-0.0705467	0.102883	15.932	0.502759	0.983099	NA
ABHD6_HUMAN	Q9BV23	Monoacylglycerol lipase ABHD6	ABHD6	G-6599_DMSO_30min	0.20037	0.102883	15.932	0.0693125	0.743939	NA
ABHDA_HUMAN	Q9NUJ1	Mycophenolic acid acyl-glucuronide esterase, mitochondrial	ABHD10	G-6599_DMSO_60min	-0.218582	0.142804	15.932	0.145471	0.935452	NA
ABHDA_HUMAN	Q9NUJ1	Mycophenolic acid acyl-glucuronide esterase, mitochondrial	ABHD10	G-6599_DMSO_30min	-0.121451	0.142804	15.932	0.407662	0.903374	NA
ABHDB_HUMAN	Q8NFV4	Alpha/beta hydrolase domain-containing protein 11	ABHD11	G-6599_DMSO_60min	-0.135982	0.16948	15.932	0.434157	0.980183	NA
ABHDB_HUMAN	Q8NFV4	Alpha/beta hydrolase domain-containing protein 11	ABHD11	G-6599_DMSO_30min	-0.0804159	0.16948	15.932	0.641592	0.944526	NA
ABHEB_HUMAN	Q96IU4	Alpha/beta hydrolase domain-containing protein 14B	ABHD14B	G-6599_DMSO_30min	-0.185164	0.12795	15.932	0.167242	0.833529	NA
ABHEB_HUMAN	Q96IU4	Alpha/beta hydrolase domain-containing protein 14B	ABHD14B	G-6599_DMSO_60min	0.0969814	0.12795	15.932	0.459537	0.982449	NA
ABHGA_HUMAN	O95870	Abhydrolase domain-containing protein 16A	ABHD16A	G-6599_DMSO_30min	0.0419338	0.106943	15.932	0.70017	0.955538	NA
ABHGA_HUMAN	O95870	Abhydrolase domain-containing protein 16A	ABHD16A	G-6599_DMSO_60min	-0.136881	0.106943	15.932	0.21889	0.957205	NA
ABI1_HUMAN	Q8IZP0	Abl interactor 1	ABI1	G-6599_DMSO_60min	0.0728708	0.0858128	15.932	0.408359	0.975156	NA
ABI1_HUMAN	Q8IZP0	Abl interactor 1	ABI1	G-6599_DMSO_30min	0.0441306	0.0858128	15.932	0.614125	0.941633	NA
ABI2_HUMAN	Q9NYB9	Abl interactor 2	ABI2	G-6599_DMSO_30min	0.018492	0.0624762	15.932	0.771064	0.960334	NA
ABI2_HUMAN	Q9NYB9	Abl interactor 2	ABI2	G-6599_DMSO_60min	0.00339742	0.0624762	15.932	0.957309	0.997441	NA
ABITM_HUMAN	Q9NX38	NA	NA	G-6599_DMSO_30min	-0.0810041	0.125762	15.932	0.528672	0.927126	NA
ABITM_HUMAN	Q9NX38	NA	NA	G-6599_DMSO_60min	0.189996	0.125762	15.932	0.15043	0.935452	NA
ABL1_HUMAN	P00519	Tyrosine-protein kinase ABL1	ABL1	G-6599_DMSO_30min	0.0288949	0.0623105	15.932	0.649118	0.944856	NA
ABL1_HUMAN	P00519	Tyrosine-protein kinase ABL1	ABL1	G-6599_DMSO_60min	0.0225178	0.0623105	15.932	0.722563	0.989908	NA
ABL2_HUMAN	P42684	Abelson tyrosine-protein kinase 2	ABL2	G-6599_DMSO_60min	0.0194152	0.0713707	15.932	0.789091	0.994708	NA
ABL2_HUMAN	P42684	Abelson tyrosine-protein kinase 2	ABL2	G-6599_DMSO_30min	0.119958	0.0713707	15.932	0.112304	0.806011	NA
ABLM2_HUMAN	Q6H8Q1	Actin-binding LIM protein 2	ABLIM2	G-6599_DMSO_30min	0.12793	0.105893	15.932	0.244633	0.86791	NA
ABLM2_HUMAN	Q6H8Q1	Actin-binding LIM protein 2	ABLIM2	G-6599_DMSO_60min	0.0865958	0.105893	15.932	0.42555	0.979629	NA
ABR_HUMAN	Q12979	Active breakpoint cluster region-related protein	ABR	G-6599_DMSO_60min	0.0303362	0.0857364	15.932	0.728104	0.991218	NA
ABR_HUMAN	Q12979	Active breakpoint cluster region-related protein	ABR	G-6599_DMSO_30min	-0.0148051	0.0857364	15.932	0.865077	0.978722	NA
ABRX1_HUMAN	Q6UWZ7	NA	NA	G-6599_DMSO_30min	-0.00622181	0.0559147	15.932	0.912789	0.98622	NA
ABRX1_HUMAN	Q6UWZ7	NA	NA	G-6599_DMSO_60min	-0.0211558	0.0559147	15.932	0.710158	0.988848	NA
ABRX2_HUMAN	Q15018	NA	NA	G-6599_DMSO_30min	0.0269117	0.0872625	15.932	0.761774	0.958559	NA
ABRX2_HUMAN	Q15018	NA	NA	G-6599_DMSO_60min	0.04453	0.0872625	15.932	0.616839	0.986136	NA
ABT1_HUMAN	Q9ULW3	Activator of basal transcription 1	ABT1	G-6599_DMSO_30min	0.0640478	0.0693755	15.932	0.369672	0.893483	NA
ABT1_HUMAN	Q9ULW3	Activator of basal transcription 1	ABT1	G-6599_DMSO_60min	-0.0444522	0.0693755	15.932	0.530796	0.983099	NA
ABTB1_HUMAN	Q969K4	Ankyrin repeat and BTB/POZ domain-containing protein 1	ABTB1	G-6599_DMSO_30min	-0.0696453	0.139361	15.932	0.624084	0.944441	NA
ABTB1_HUMAN	Q969K4	Ankyrin repeat and BTB/POZ domain-containing protein 1	ABTB1	G-6599_DMSO_60min	-0.0134356	0.139361	15.932	0.924398	0.996995	NA
ABTB2_HUMAN	Q8N961	Ankyrin repeat and BTB/POZ domain-containing protein 2	ABTB2	G-6599_DMSO_30min	-0.414666	0.454677	15.932	0.375363	0.893483	NA
ABTB2_HUMAN	Q8N961	Ankyrin repeat and BTB/POZ domain-containing protein 2	ABTB2	G-6599_DMSO_60min	0.556867	0.454677	15.932	0.238469	0.957205	NA
ABTB3_HUMAN	A6QL63	NA	NA	G-6599_DMSO_30min	-0.0411246	0.108042	15.932	0.7085	0.956065	NA
ABTB3_HUMAN	A6QL63	NA	NA	G-6599_DMSO_60min	0.149797	0.108042	15.932	0.184699	0.955802	NA
ACACA_HUMAN	Q13085	Acetyl-CoA carboxylase 1	ACACA	G-6599_DMSO_30min	-0.00993559	0.0723883	15.932	0.89255	0.985123	NA
ACACA_HUMAN	Q13085	Acetyl-CoA carboxylase 1	ACACA	G-6599_DMSO_60min	0.0287174	0.0723883	15.932	0.696842	0.988501	NA
ACAD8_HUMAN	Q9UKU7	Isobutyryl-CoA dehydrogenase, mitochondrial	ACAD8	G-6599_DMSO_60min	-0.119555	0.130438	15.932	0.373038	0.973968	NA
ACAD8_HUMAN	Q9UKU7	Isobutyryl-CoA dehydrogenase, mitochondrial	ACAD8	G-6599_DMSO_30min	-0.174362	0.130438	15.932	0.200085	0.84562	NA
ACAD9_HUMAN	Q9H845	Acyl-CoA dehydrogenase family member 9, mitochondrial	ACAD9	G-6599_DMSO_60min	-0.313598	0.1311	15.932	0.0294379	0.90581	NA
ACAD9_HUMAN	Q9H845	Acyl-CoA dehydrogenase family member 9, mitochondrial	ACAD9	G-6599_DMSO_30min	-0.114252	0.1311	15.932	0.39643	0.899572	NA
ACADM_HUMAN	P11310	Medium-chain specific acyl-CoA dehydrogenase, mitochondrial	ACADM	G-6599_DMSO_60min	-0.126574	0.155837	15.932	0.428638	0.980183	NA
ACADM_HUMAN	P11310	Medium-chain specific acyl-CoA dehydrogenase, mitochondrial	ACADM	G-6599_DMSO_30min	-0.0341472	0.155837	15.932	0.829338	0.972552	NA
ACADS_HUMAN	P16219	Short-chain specific acyl-CoA dehydrogenase, mitochondrial	ACADS	G-6599_DMSO_60min	-0.057811	0.153493	15.932	0.711413	0.988848	NA
ACADS_HUMAN	P16219	Short-chain specific acyl-CoA dehydrogenase, mitochondrial	ACADS	G-6599_DMSO_30min	-0.142538	0.153493	15.932	0.366938	0.893483	NA
ACADV_HUMAN	P49748	Very long-chain specific acyl-CoA dehydrogenase, mitochondrial	ACADVL	G-6599_DMSO_30min	-0.0833718	0.171847	15.932	0.634173	0.944526	NA
ACADV_HUMAN	P49748	Very long-chain specific acyl-CoA dehydrogenase, mitochondrial	ACADVL	G-6599_DMSO_60min	-0.149145	0.171847	15.932	0.398338	0.973968	NA
ACAP2_HUMAN	Q15057	Arf-GAP with coiled-coil, ANK repeat and PH domain-containing protein 2	ACAP2	G-6599_DMSO_60min	0.0226182	0.0528668	15.932	0.6745	0.987123	NA
ACAP2_HUMAN	Q15057	Arf-GAP with coiled-coil, ANK repeat and PH domain-containing protein 2	ACAP2	G-6599_DMSO_30min	0.0195979	0.0528668	15.932	0.715741	0.956976	NA
ACATN_HUMAN	O00400	Acetyl-coenzyme A transporter 1	SLC33A1	G-6599_DMSO_60min	0.0887879	0.173639	15.932	0.616129	0.986136	NA
ACATN_HUMAN	O00400	Acetyl-coenzyme A transporter 1	SLC33A1	G-6599_DMSO_30min	-0.205202	0.173639	15.932	0.254636	0.870404	NA
ACBD5_HUMAN	Q5T8D3	Acyl-CoA-binding domain-containing protein 5	ACBD5	G-6599_DMSO_30min	0.104859	0.0753898	15.932	0.183383	0.837328	NA
ACBD5_HUMAN	Q5T8D3	Acyl-CoA-binding domain-containing protein 5	ACBD5	G-6599_DMSO_60min	0.0198166	0.0753898	15.932	0.796031	0.994708	NA
ACBD6_HUMAN	Q9BR61	Acyl-CoA-binding domain-containing protein 6	ACBD6	G-6599_DMSO_60min	0.0533738	0.0832753	15.932	0.530679	0.983099	NA
ACBD6_HUMAN	Q9BR61	Acyl-CoA-binding domain-containing protein 6	ACBD6	G-6599_DMSO_30min	-0.0774919	0.0832753	15.932	0.365973	0.893483	NA
ACBD7_HUMAN	Q8N6N7	Acyl-CoA-binding domain-containing protein 7	ACBD7	G-6599_DMSO_30min	0.0908018	0.0803096	15.932	0.274938	0.870404	NA
ACBD7_HUMAN	Q8N6N7	Acyl-CoA-binding domain-containing protein 7	ACBD7	G-6599_DMSO_60min	-0.0770109	0.0803096	15.932	0.351924	0.973968	NA
ACBP_HUMAN	P07108	Acyl-CoA-binding protein	DBI	G-6599_DMSO_60min	0.0746185	0.0869608	15.932	0.403578	0.973968	NA
ACBP_HUMAN	P07108	Acyl-CoA-binding protein	DBI	G-6599_DMSO_30min	-0.0456708	0.0869608	15.932	0.606684	0.941094	NA
ACD_HUMAN	Q96AP0	Adrenocortical dysplasia protein homolog	ACD	G-6599_DMSO_30min	0.067702	0.0904033	15.932	0.464838	0.913769	NA
ACD_HUMAN	Q96AP0	Adrenocortical dysplasia protein homolog	ACD	G-6599_DMSO_60min	0.0649234	0.0904033	15.932	0.483062	0.982773	NA
ACD10_HUMAN	Q6JQN1	Acyl-CoA dehydrogenase family member 10	ACAD10	G-6599_DMSO_30min	-0.0943921	0.153846	15.932	0.548173	0.930884	NA
ACD10_HUMAN	Q6JQN1	Acyl-CoA dehydrogenase family member 10	ACAD10	G-6599_DMSO_60min	-0.189322	0.153846	15.932	0.236333	0.957205	NA
ACD11_HUMAN	Q709F0	Acyl-CoA dehydrogenase family member 11	ACAD11	G-6599_DMSO_60min	0.0220888	0.0823509	15.932	0.791966	0.994708	NA
ACD11_HUMAN	Q709F0	Acyl-CoA dehydrogenase family member 11	ACAD11	G-6599_DMSO_30min	0.0940928	0.0823509	15.932	0.270093	0.870404	NA
ACDSB_HUMAN	P45954	Short/branched chain specific acyl-CoA dehydrogenase, mitochondrial	ACADSB	G-6599_DMSO_60min	-0.203316	0.134509	15.932	0.150231	0.935452	NA
ACDSB_HUMAN	P45954	Short/branched chain specific acyl-CoA dehydrogenase, mitochondrial	ACADSB	G-6599_DMSO_30min	-0.105459	0.134509	15.932	0.444521	0.909483	NA
ACINU_HUMAN	Q9UKV3	Apoptotic chromatin condensation inducer in the nucleus	ACIN1	G-6599_DMSO_60min	0.098119	0.072953	15.932	0.197472	0.957205	NA
ACINU_HUMAN	Q9UKV3	Apoptotic chromatin condensation inducer in the nucleus	ACIN1	G-6599_DMSO_30min	0.0482917	0.072953	15.932	0.51746	0.922729	NA
ACINU_HUMAN	Q9UKV3-5	Apoptotic chromatin condensation inducer in the nucleus (isoform 5)	ACIN1	G-6599_DMSO_30min	-0.0747188	0.121684	15.932	0.547857	0.930884	NA
ACINU_HUMAN	Q9UKV3-5	Apoptotic chromatin condensation inducer in the nucleus (isoform 5)	ACIN1	G-6599_DMSO_60min	-0.160873	0.121684	15.932	0.204818	0.957205	NA
ACK1_HUMAN	Q07912	Activated CDC42 kinase 1	TNK2	G-6599_DMSO_60min	0.0767494	0.0621519	15.932	0.234783	0.957205	NA
ACK1_HUMAN	Q07912	Activated CDC42 kinase 1	TNK2	G-6599_DMSO_30min	0.0320376	0.0621519	15.932	0.613302	0.941633	NA
ACKMT_HUMAN	Q6P4H8	NA	NA	G-6599_DMSO_30min	0.0136411	0.120498	15.932	0.911282	0.98622	NA
ACKMT_HUMAN	Q6P4H8	NA	NA	G-6599_DMSO_60min	-0.0825929	0.120498	15.932	0.502926	0.983099	NA
ACL6A_HUMAN	O96019	Actin-like protein 6A	ACTL6A	G-6599_DMSO_60min	0.00698039	0.0738036	15.932	0.925827	0.996995	NA
ACL6A_HUMAN	O96019	Actin-like protein 6A	ACTL6A	G-6599_DMSO_30min	-0.0152781	0.0738036	15.932	0.838624	0.973401	NA
ACLY_HUMAN	P53396	ATP-citrate synthase	ACLY	G-6599_DMSO_60min	0.10372	0.0661393	15.932	0.136477	0.934825	NA
ACLY_HUMAN	P53396	ATP-citrate synthase	ACLY	G-6599_DMSO_30min	0.0382809	0.0661393	15.932	0.570822	0.936292	NA
ACO11_HUMAN	Q8WXI4	Acyl-coenzyme A thioesterase 11	ACOT11	G-6599_DMSO_60min	-0.0706492	0.105302	15.932	0.511882	0.983099	NA
ACO11_HUMAN	Q8WXI4	Acyl-coenzyme A thioesterase 11	ACOT11	G-6599_DMSO_30min	-0.116543	0.105302	15.932	0.284836	0.870404	NA
ACO11_HUMAN	Q8WXI4-2	Acyl-coenzyme A thioesterase 11 (isoform 2)	ACOT11	G-6599_DMSO_30min	-0.19881	0.132287	15.932	0.152435	0.833394	NA
ACO11_HUMAN	Q8WXI4-2	Acyl-coenzyme A thioesterase 11 (isoform 2)	ACOT11	G-6599_DMSO_60min	0.162774	0.132287	15.932	0.236384	0.957205	NA
ACO13_HUMAN	Q9NPJ3	Acyl-coenzyme A thioesterase 13	ACOT13	G-6599_DMSO_60min	-0.126168	0.171544	15.932	0.472733	0.982773	NA
ACO13_HUMAN	Q9NPJ3	Acyl-coenzyme A thioesterase 13	ACOT13	G-6599_DMSO_30min	-0.145743	0.171544	15.932	0.408138	0.903697	NA
ACOHC_HUMAN	P21399	NA	NA	G-6599_DMSO_30min	0.150473	0.157981	15.932	0.355084	0.891233	NA
ACOHC_HUMAN	P21399	NA	NA	G-6599_DMSO_60min	0.128569	0.157981	15.932	0.427739	0.980183	NA
ACON_HUMAN	Q99798	Aconitate hydratase, mitochondrial	ACO2	G-6599_DMSO_30min	0.0108935	0.150691	15.932	0.943271	0.991979	NA
ACON_HUMAN	Q99798	Aconitate hydratase, mitochondrial	ACO2	G-6599_DMSO_60min	-0.203499	0.150691	15.932	0.195747	0.957205	NA
ACOT1_HUMAN	Q86TX2	Acyl-coenzyme A thioesterase 1	ACOT1	G-6599_DMSO_30min	-0.309896	0.147326	15.932	0.0516677	0.733363	NA
ACOT1_HUMAN	Q86TX2	Acyl-coenzyme A thioesterase 1	ACOT1	G-6599_DMSO_60min	-0.10586	0.147326	15.932	0.482826	0.982773	NA
ACOT8_HUMAN	O14734	Acyl-coenzyme A thioesterase 8	ACOT8	G-6599_DMSO_60min	0.0490672	0.0695734	15.932	0.490833	0.983099	NA
ACOT8_HUMAN	O14734	Acyl-coenzyme A thioesterase 8	ACOT8	G-6599_DMSO_30min	0.116724	0.0695734	15.932	0.11291	0.806011	NA
ACOT9_HUMAN	Q9Y305	Acyl-coenzyme A thioesterase 9, mitochondrial	ACOT9	G-6599_DMSO_60min	-0.206184	0.120934	15.932	0.107626	0.934825	NA
ACOT9_HUMAN	Q9Y305	Acyl-coenzyme A thioesterase 9, mitochondrial	ACOT9	G-6599_DMSO_30min	0.0495683	0.120934	15.932	0.687354	0.954749	NA
ACOX1_HUMAN	Q15067	Peroxisomal acyl-coenzyme A oxidase 1	ACOX1	G-6599_DMSO_30min	0.260868	0.190713	15.932	0.190342	0.842726	NA
ACOX1_HUMAN	Q15067	Peroxisomal acyl-coenzyme A oxidase 1	ACOX1	G-6599_DMSO_60min	0.246075	0.190713	15.932	0.215365	0.957205	NA
ACOX3_HUMAN	O15254	Peroxisomal acyl-coenzyme A oxidase 3	ACOX3	G-6599_DMSO_30min	0.0676888	0.0705111	15.932	0.351412	0.891233	NA
ACOX3_HUMAN	O15254	Peroxisomal acyl-coenzyme A oxidase 3	ACOX3	G-6599_DMSO_60min	0.0670968	0.0705111	15.932	0.355525	0.973968	NA
ACPH_HUMAN	P13798	Acylamino-acid-releasing enzyme	APEH	G-6599_DMSO_30min	-0.0107364	0.103569	15.932	0.91873	0.98623	NA
ACPH_HUMAN	P13798	Acylamino-acid-releasing enzyme	APEH	G-6599_DMSO_60min	0.21792	0.103569	15.932	0.0516066	0.907189	NA
ACS2L_HUMAN	Q9NUB1	Acetyl-coenzyme A synthetase 2-like, mitochondrial	ACSS1	G-6599_DMSO_30min	0.156252	0.228839	15.932	0.50454	0.920487	NA
ACS2L_HUMAN	Q9NUB1	Acetyl-coenzyme A synthetase 2-like, mitochondrial	ACSS1	G-6599_DMSO_60min	0.122875	0.228839	15.932	0.598721	0.986136	NA
ACSA_HUMAN	Q9NR19	Acetyl-coenzyme A synthetase, cytoplasmic	ACSS2	G-6599_DMSO_60min	0.1448	0.0911082	15.932	0.131632	0.934825	NA
ACSA_HUMAN	Q9NR19	Acetyl-coenzyme A synthetase, cytoplasmic	ACSS2	G-6599_DMSO_30min	-0.0780491	0.0911082	15.932	0.404332	0.901921	NA
ACSF2_HUMAN	Q96CM8	Acyl-CoA synthetase family member 2, mitochondrial	ACSF2	G-6599_DMSO_30min	-0.0867711	0.156954	15.932	0.588044	0.93774	NA
ACSF2_HUMAN	Q96CM8	Acyl-CoA synthetase family member 2, mitochondrial	ACSF2	G-6599_DMSO_60min	-0.178916	0.156954	15.932	0.271165	0.960319	NA
ACSF3_HUMAN	Q4G176	Acyl-CoA synthetase family member 3, mitochondrial	ACSF3	G-6599_DMSO_30min	-0.0883875	0.156074	15.932	0.579068	0.937019	NA
ACSF3_HUMAN	Q4G176	Acyl-CoA synthetase family member 3, mitochondrial	ACSF3	G-6599_DMSO_60min	-0.106318	0.156074	15.932	0.505522	0.983099	NA
ACSL1_HUMAN	P33121	Long-chain-fatty-acid--CoA ligase 1	ACSL1	G-6599_DMSO_30min	0.0224676	0.0580565	15.932	0.70388	0.955538	NA
ACSL1_HUMAN	P33121	Long-chain-fatty-acid--CoA ligase 1	ACSL1	G-6599_DMSO_60min	0.000763411	0.0580565	15.932	0.989672	0.99975	NA
ACSL3_HUMAN	O95573	Long-chain-fatty-acid--CoA ligase 3	ACSL3	G-6599_DMSO_60min	-0.0863804	0.0880649	15.932	0.341317	0.973968	NA
ACSL3_HUMAN	O95573	Long-chain-fatty-acid--CoA ligase 3	ACSL3	G-6599_DMSO_30min	0.0632184	0.0880649	15.932	0.483237	0.918807	NA
ACSL4_HUMAN	O60488	Long-chain-fatty-acid--CoA ligase 4	ACSL4	G-6599_DMSO_60min	0.229681	0.103006	15.932	0.0405031	0.907189	NA
ACSL4_HUMAN	O60488	Long-chain-fatty-acid--CoA ligase 4	ACSL4	G-6599_DMSO_30min	-0.203688	0.103006	15.932	0.065559	0.743939	NA
ACSM3_HUMAN	Q53FZ2	Acyl-coenzyme A synthetase ACSM3, mitochondrial	ACSM3	G-6599_DMSO_60min	-0.0987126	0.129402	15.932	0.456709	0.982449	NA
ACSM3_HUMAN	Q53FZ2	Acyl-coenzyme A synthetase ACSM3, mitochondrial	ACSM3	G-6599_DMSO_30min	-0.0319361	0.129402	15.932	0.808217	0.96902	NA
ACTA_HUMAN	P62736	Actin, aortic smooth muscle	ACTA2	G-6599_DMSO_60min	0.118099	0.0666397	15.932	0.0954799	0.934825	NA
ACTA_HUMAN	P62736	Actin, aortic smooth muscle	ACTA2	G-6599_DMSO_30min	0.0016488	0.0666397	15.932	0.980568	0.996004	NA
ACTBM_HUMAN	Q9BYX7	Putative beta-actin-like protein 3	POTEKP	G-6599_DMSO_60min	-0.0211704	0.269501	15.932	0.938365	0.996995	NA
ACTBM_HUMAN	Q9BYX7	Putative beta-actin-like protein 3	POTEKP	G-6599_DMSO_30min	-0.00899583	0.269501	15.932	0.973787	0.99348	NA
ACTN1_HUMAN	P12814	Alpha-actinin-1	ACTN1	G-6599_DMSO_30min	0.00444011	0.108986	15.932	0.968009	0.99348	NA
ACTN1_HUMAN	P12814	Alpha-actinin-1	ACTN1	G-6599_DMSO_60min	0.0292223	0.108986	15.932	0.792041	0.994708	NA
ACTN2_HUMAN	P35609	Alpha-actinin-2	ACTN2	G-6599_DMSO_60min	0.0628068	0.186154	15.932	0.740225	0.993608	NA
ACTN2_HUMAN	P35609	Alpha-actinin-2	ACTN2	G-6599_DMSO_30min	0.0273836	0.186154	15.932	0.884897	0.983677	NA
ACTN4_HUMAN	O43707	Alpha-actinin-4	ACTN4	G-6599_DMSO_30min	0.00544987	0.0922492	15.932	0.953625	0.992011	NA
ACTN4_HUMAN	O43707	Alpha-actinin-4	ACTN4	G-6599_DMSO_60min	-0.124254	0.0922492	15.932	0.196849	0.957205	NA
ACTY_HUMAN	P42025	Beta-centractin	ACTR1B	G-6599_DMSO_60min	-0.108803	0.121201	15.932	0.382709	0.973968	NA
ACTY_HUMAN	P42025	Beta-centractin	ACTR1B	G-6599_DMSO_30min	0.239098	0.121201	15.932	0.0661366	0.743939	NA
ACTZ_HUMAN	P61163	Alpha-centractin	ACTR1A	G-6599_DMSO_30min	-0.0318057	0.103626	15.932	0.762874	0.958559	NA
ACTZ_HUMAN	P61163	Alpha-centractin	ACTR1A	G-6599_DMSO_60min	0.124766	0.103626	15.932	0.246174	0.957205	NA
ACVR1_HUMAN	Q04771	Activin receptor type-1	ACVR1	G-6599_DMSO_30min	0.0859232	0.0954912	15.932	0.381625	0.897483	NA
ACVR1_HUMAN	Q04771	Activin receptor type-1	ACVR1	G-6599_DMSO_60min	-0.0989154	0.0954912	15.932	0.315736	0.973968	NA
ACY1_HUMAN	Q03154	Aminoacylase-1	ACY1	G-6599_DMSO_30min	0.0224928	0.0686498	15.932	0.747445	0.958559	NA
ACY1_HUMAN	Q03154	Aminoacylase-1	ACY1	G-6599_DMSO_60min	0.0756328	0.0686498	15.932	0.28695	0.966033	NA
ACYP1_HUMAN	P07311	Acylphosphatase-1	ACYP1	G-6599_DMSO_60min	-0.0281838	0.195225	15.932	0.887022	0.996427	NA
ACYP1_HUMAN	P07311	Acylphosphatase-1	ACYP1	G-6599_DMSO_30min	-0.106061	0.195225	15.932	0.594462	0.939563	NA
ACYP2_HUMAN	P14621	Acylphosphatase-2	ACYP2	G-6599_DMSO_60min	0.0578462	0.0859517	15.932	0.510587	0.983099	NA
ACYP2_HUMAN	P14621	Acylphosphatase-2	ACYP2	G-6599_DMSO_30min	-0.0758754	0.0859517	15.932	0.390487	0.898013	NA
ADA_HUMAN	P00813	Adenosine deaminase	ADA	G-6599_DMSO_30min	-0.0670472	0.111384	15.932	0.555681	0.932566	NA
ADA_HUMAN	P00813	Adenosine deaminase	ADA	G-6599_DMSO_60min	-7.73189e-06	0.111384	15.932	0.999945	0.999978	NA
ADA10_HUMAN	O14672	Disintegrin and metalloproteinase domain-containing protein 10	ADAM10	G-6599_DMSO_30min	0.127466	0.118469	15.932	0.297973	0.87149	NA
ADA10_HUMAN	O14672	Disintegrin and metalloproteinase domain-containing protein 10	ADAM10	G-6599_DMSO_60min	-0.00246	0.118469	15.932	0.983691	0.99975	NA
ADA15_HUMAN	Q13444	Disintegrin and metalloproteinase domain-containing protein 15	ADAM15	G-6599_DMSO_30min	0.030027	0.0728239	15.932	0.685597	0.954749	NA
ADA15_HUMAN	Q13444	Disintegrin and metalloproteinase domain-containing protein 15	ADAM15	G-6599_DMSO_60min	-0.00135748	0.0728239	15.932	0.985359	0.99975	NA
ADA17_HUMAN	P78536	Disintegrin and metalloproteinase domain-containing protein 17	ADAM17	G-6599_DMSO_60min	-0.0188107	0.082993	15.932	0.823576	0.994708	NA
ADA17_HUMAN	P78536	Disintegrin and metalloproteinase domain-containing protein 17	ADAM17	G-6599_DMSO_30min	0.0829739	0.082993	15.932	0.332365	0.884891	NA
ADA19_HUMAN	Q9H013	Disintegrin and metalloproteinase domain-containing protein 19	ADAM19	G-6599_DMSO_30min	-0.0529556	0.157687	15.932	0.741384	0.958559	NA
ADA19_HUMAN	Q9H013	Disintegrin and metalloproteinase domain-containing protein 19	ADAM19	G-6599_DMSO_60min	0.133883	0.157687	15.932	0.408436	0.975156	NA
ADA2C_HUMAN	P18825	Alpha-2C adrenergic receptor	ADRA2C	G-6599_DMSO_60min	0.1073	0.131754	15.932	0.427422	0.980183	NA
ADA2C_HUMAN	P18825	Alpha-2C adrenergic receptor	ADRA2C	G-6599_DMSO_30min	-0.0611291	0.131754	15.932	0.64895	0.944856	NA
ADAM9_HUMAN	Q13443	Disintegrin and metalloproteinase domain-containing protein 9	ADAM9	G-6599_DMSO_60min	-0.063123	0.0785916	15.932	0.433692	0.980183	NA
ADAM9_HUMAN	Q13443	Disintegrin and metalloproteinase domain-containing protein 9	ADAM9	G-6599_DMSO_30min	0.0948255	0.0785916	15.932	0.245213	0.86791	NA
ADAP1_HUMAN	O75689	Arf-GAP with dual PH domain-containing protein 1	ADAP1	G-6599_DMSO_30min	0.0248209	0.0760514	15.932	0.748392	0.958559	NA
ADAP1_HUMAN	O75689	Arf-GAP with dual PH domain-containing protein 1	ADAP1	G-6599_DMSO_60min	0.0554298	0.0760514	15.932	0.476674	0.982773	NA
ADAS_HUMAN	O00116	Alkyldihydroxyacetonephosphate synthase, peroxisomal	AGPS	G-6599_DMSO_30min	0.00681114	0.102629	15.932	0.947912	0.991979	NA
ADAS_HUMAN	O00116	Alkyldihydroxyacetonephosphate synthase, peroxisomal	AGPS	G-6599_DMSO_60min	0.0830858	0.102629	15.932	0.430109	0.980183	NA
ADAT1_HUMAN	Q9BUB4	tRNA-specific adenosine deaminase 1	ADAT1	G-6599_DMSO_60min	-0.0244456	0.0919889	15.932	0.793844	0.994708	NA
ADAT1_HUMAN	Q9BUB4	tRNA-specific adenosine deaminase 1	ADAT1	G-6599_DMSO_30min	0.041175	0.0919889	15.932	0.660462	0.94789	NA
ADAT2_HUMAN	Q7Z6V5	tRNA-specific adenosine deaminase 2	ADAT2	G-6599_DMSO_60min	-2.9964e-05	0.0964033	15.932	0.999756	0.999978	NA
ADAT2_HUMAN	Q7Z6V5	tRNA-specific adenosine deaminase 2	ADAT2	G-6599_DMSO_30min	0.106773	0.0964033	15.932	0.284492	0.870404	NA
ADAT3_HUMAN	Q96EY9	Probable inactive tRNA-specific adenosine deaminase-like protein 3	ADAT3	G-6599_DMSO_60min	-0.0241991	0.0894847	15.932	0.790304	0.994708	NA
ADAT3_HUMAN	Q96EY9	Probable inactive tRNA-specific adenosine deaminase-like protein 3	ADAT3	G-6599_DMSO_30min	0.0407925	0.0894847	15.932	0.654643	0.946911	NA
ADCK1_HUMAN	Q86TW2	Uncharacterized aarF domain-containing protein kinase 1	ADCK1	G-6599_DMSO_30min	0.106449	0.128803	15.932	0.420756	0.906925	NA
ADCK1_HUMAN	Q86TW2	Uncharacterized aarF domain-containing protein kinase 1	ADCK1	G-6599_DMSO_60min	-0.00776062	0.128803	15.932	0.952704	0.997441	NA
ADCY3_HUMAN	O60266	Adenylate cyclase type 3	ADCY3	G-6599_DMSO_60min	-0.0289804	0.0680624	15.932	0.675956	0.987123	NA
ADCY3_HUMAN	O60266	Adenylate cyclase type 3	ADCY3	G-6599_DMSO_30min	0.0707424	0.0680624	15.932	0.314148	0.87702	NA
ADCY6_HUMAN	O43306	Adenylate cyclase type 6	ADCY6	G-6599_DMSO_30min	-0.113302	0.12922	15.932	0.393615	0.899572	NA
ADCY6_HUMAN	O43306	Adenylate cyclase type 6	ADCY6	G-6599_DMSO_60min	0.186788	0.12922	15.932	0.167699	0.948862	NA
ADCY9_HUMAN	O60503	Adenylate cyclase type 9	ADCY9	G-6599_DMSO_60min	0.0863779	0.13099	15.932	0.519042	0.983099	NA
ADCY9_HUMAN	O60503	Adenylate cyclase type 9	ADCY9	G-6599_DMSO_30min	0.154554	0.13099	15.932	0.255363	0.870404	NA
ADDA_HUMAN	P35611	Alpha-adducin	ADD1	G-6599_DMSO_30min	0.114139	0.0754822	15.932	0.150083	0.833394	NA
ADDA_HUMAN	P35611	Alpha-adducin	ADD1	G-6599_DMSO_60min	0.0765196	0.0754822	15.932	0.325854	0.973968	NA
ADDG_HUMAN	Q9UEY8	Gamma-adducin	ADD3	G-6599_DMSO_60min	0.0657248	0.101173	15.932	0.52519	0.983099	NA
ADDG_HUMAN	Q9UEY8	Gamma-adducin	ADD3	G-6599_DMSO_30min	-0.0685036	0.101173	15.932	0.508061	0.920487	NA
ADDG_HUMAN	Q9UEY8-2	Gamma-adducin (isoform 2)	ADD3	G-6599_DMSO_60min	-0.0561903	0.07311	15.932	0.45339	0.982449	NA
ADDG_HUMAN	Q9UEY8-2	Gamma-adducin (isoform 2)	ADD3	G-6599_DMSO_30min	0.229051	0.07311	15.932	0.00644711	0.453294	NA
ADH6_HUMAN	P28332	Alcohol dehydrogenase 6	ADH6	G-6599_DMSO_30min	-0.00537037	0.14966	15.932	0.971821	0.99348	NA
ADH6_HUMAN	P28332	Alcohol dehydrogenase 6	ADH6	G-6599_DMSO_60min	0.11283	0.14966	15.932	0.461903	0.982449	NA
ADHX_HUMAN	P11766	Alcohol dehydrogenase class-3	ADH5	G-6599_DMSO_60min	0.0365216	0.0729588	15.932	0.623512	0.986136	NA
ADHX_HUMAN	P11766	Alcohol dehydrogenase class-3	ADH5	G-6599_DMSO_30min	-0.134672	0.0729588	15.932	0.0835771	0.776925	NA
ADIP_HUMAN	Q9Y2D8	Afadin- and alpha-actinin-binding protein	SSX2IP	G-6599_DMSO_30min	-0.181236	0.111337	15.932	0.123176	0.813489	NA
ADIP_HUMAN	Q9Y2D8	Afadin- and alpha-actinin-binding protein	SSX2IP	G-6599_DMSO_60min	0.267111	0.111337	15.932	0.0290276	0.90581	NA
ADK_HUMAN	P55263	Adenosine kinase	ADK	G-6599_DMSO_60min	0.0979558	0.074738	15.932	0.208554	0.957205	NA
ADK_HUMAN	P55263	Adenosine kinase	ADK	G-6599_DMSO_30min	-0.154168	0.074738	15.932	0.0558275	0.739356	NA
ADML_HUMAN	P35318	ADM	ADM	G-6599_DMSO_30min	-0.0989867	0.0923115	15.932	0.299555	0.872304	NA
ADML_HUMAN	P35318	ADM	ADM	G-6599_DMSO_60min	-0.244772	0.0923115	15.932	0.0174585	0.870308	NA
ADNP_HUMAN	Q9H2P0	Activity-dependent neuroprotector homeobox protein	ADNP	G-6599_DMSO_30min	0.0866155	0.0742529	15.932	0.26058	0.870404	NA
ADNP_HUMAN	Q9H2P0	Activity-dependent neuroprotector homeobox protein	ADNP	G-6599_DMSO_60min	0.0817193	0.0742529	15.932	0.287442	0.966033	NA
ADNP2_HUMAN	Q6IQ32	ADNP homeobox protein 2	ADNP2	G-6599_DMSO_30min	0.245128	0.0890824	15.932	0.0142256	0.575716	NA
ADNP2_HUMAN	Q6IQ32	ADNP homeobox protein 2	ADNP2	G-6599_DMSO_60min	0.118121	0.0890824	15.932	0.203544	0.957205	NA
ADPGK_HUMAN	Q9BRR6	ADP-dependent glucokinase	ADPGK	G-6599_DMSO_60min	0.0143714	0.0919563	15.932	0.877772	0.99642	NA
ADPGK_HUMAN	Q9BRR6	ADP-dependent glucokinase	ADPGK	G-6599_DMSO_30min	0.0487106	0.0919563	15.932	0.603614	0.941094	NA
ADPPT_HUMAN	Q9NRN7	L-aminoadipate-semialdehyde dehydrogenase-phosphopantetheinyl transferase	AASDHPPT	G-6599_DMSO_60min	0.0205734	0.102413	15.932	0.843329	0.994708	NA
ADPPT_HUMAN	Q9NRN7	L-aminoadipate-semialdehyde dehydrogenase-phosphopantetheinyl transferase	AASDHPPT	G-6599_DMSO_30min	-0.114225	0.102413	15.932	0.281247	0.870404	NA
ADPRS_HUMAN	Q9NX46	NA	NA	G-6599_DMSO_30min	-0.0771231	0.0597477	15.932	0.215186	0.852945	NA
ADPRS_HUMAN	Q9NX46	NA	NA	G-6599_DMSO_60min	0.00745944	0.0597477	15.932	0.902205	0.996427	NA
ADRM1_HUMAN	Q16186	Proteasomal ubiquitin receptor ADRM1	ADRM1	G-6599_DMSO_60min	0.0799228	0.0833014	15.932	0.351672	0.973968	NA
ADRM1_HUMAN	Q16186	Proteasomal ubiquitin receptor ADRM1	ADRM1	G-6599_DMSO_30min	0.0600702	0.0833014	15.932	0.481285	0.918459	NA
ADRO_HUMAN	P22570	NADPH:adrenodoxin oxidoreductase, mitochondrial	FDXR	G-6599_DMSO_30min	0.00574664	0.158024	15.932	0.971442	0.99348	NA
ADRO_HUMAN	P22570	NADPH:adrenodoxin oxidoreductase, mitochondrial	FDXR	G-6599_DMSO_60min	-0.231093	0.158024	15.932	0.163079	0.943788	NA
ADT1_HUMAN	P12235	ADP/ATP translocase 1	SLC25A4	G-6599_DMSO_30min	-0.0538789	0.143805	15.932	0.712849	0.956976	NA
ADT1_HUMAN	P12235	ADP/ATP translocase 1	SLC25A4	G-6599_DMSO_60min	-0.227045	0.143805	15.932	0.134019	0.934825	NA
ADT2_HUMAN	P05141	ADP/ATP translocase 2	SLC25A5	G-6599_DMSO_60min	-0.258256	0.130774	15.932	0.0658806	0.907189	NA
ADT2_HUMAN	P05141	ADP/ATP translocase 2	SLC25A5	G-6599_DMSO_30min	-0.218141	0.130774	15.932	0.114834	0.809167	NA
ADT3_HUMAN	P12236	ADP/ATP translocase 3	SLC25A6	G-6599_DMSO_60min	-0.32721	0.177309	15.932	0.0836442	0.914593	NA
ADT3_HUMAN	P12236	ADP/ATP translocase 3	SLC25A6	G-6599_DMSO_30min	-0.139478	0.177309	15.932	0.443037	0.909483	NA
ADX_HUMAN	P10109	Adrenodoxin, mitochondrial	FDX1	G-6599_DMSO_30min	-0.179105	0.131001	15.932	0.190544	0.842726	NA
ADX_HUMAN	P10109	Adrenodoxin, mitochondrial	FDX1	G-6599_DMSO_60min	-0.281574	0.131001	15.932	0.047316	0.907189	NA
AEBP2_HUMAN	Q6ZN18	Zinc finger protein AEBP2	AEBP2	G-6599_DMSO_30min	-0.08491	0.0837373	15.932	0.325733	0.881659	NA
AEBP2_HUMAN	Q6ZN18	Zinc finger protein AEBP2	AEBP2	G-6599_DMSO_60min	-0.234891	0.0837373	15.932	0.012746	0.742814	NA
AEDO_HUMAN	Q96SZ5	2-aminoethanethiol dioxygenase	ADO	G-6599_DMSO_30min	-0.0249796	0.074676	15.932	0.74236	0.958559	NA
AEDO_HUMAN	Q96SZ5	2-aminoethanethiol dioxygenase	ADO	G-6599_DMSO_60min	-0.00554716	0.074676	15.932	0.94171	0.996995	NA
AEN_HUMAN	Q8WTP8	Apoptosis-enhancing nuclease	AEN	G-6599_DMSO_30min	0.491391	0.11365	15.932	0.000528889	0.196549	NA
AEN_HUMAN	Q8WTP8	Apoptosis-enhancing nuclease	AEN	G-6599_DMSO_60min	0.383761	0.11365	15.932	0.00386383	0.486042	NA
AF10_HUMAN	P55197	Protein AF-10	MLLT10	G-6599_DMSO_60min	0.0582458	0.0718666	15.932	0.42961	0.980183	NA
AF10_HUMAN	P55197	Protein AF-10	MLLT10	G-6599_DMSO_30min	0.0310533	0.0718666	15.932	0.671462	0.950997	NA
AF17_HUMAN	P55198	Protein AF-17	MLLT6	G-6599_DMSO_30min	0.106835	0.102243	15.932	0.31166	0.87702	NA
AF17_HUMAN	P55198	Protein AF-17	MLLT6	G-6599_DMSO_60min	0.134689	0.102243	15.932	0.206355	0.957205	NA
AF1Q_HUMAN	Q13015	Protein AF1q	MLLT11	G-6599_DMSO_30min	0.00990124	0.143714	15.932	0.94593	0.991979	NA
AF1Q_HUMAN	Q13015	Protein AF1q	MLLT11	G-6599_DMSO_60min	0.0191419	0.143714	15.932	0.895707	0.996427	NA
AFAD_HUMAN	P55196	Afadin	MLLT4	G-6599_DMSO_60min	-0.00535776	0.0592331	15.932	0.929055	0.996995	NA
AFAD_HUMAN	P55196	Afadin	MLLT4	G-6599_DMSO_30min	0.071958	0.0592331	15.932	0.24213	0.86791	NA
AFAP1_HUMAN	Q8N556	Actin filament-associated protein 1	AFAP1	G-6599_DMSO_30min	-0.0625709	0.0846535	15.932	0.470572	0.916214	NA
AFAP1_HUMAN	Q8N556	Actin filament-associated protein 1	AFAP1	G-6599_DMSO_60min	0.104965	0.0846535	15.932	0.232949	0.957205	NA
AFF1_HUMAN	P51825	AF4/FMR2 family member 1	AFF1	G-6599_DMSO_30min	-0.0157996	0.090039	15.932	0.862917	0.978722	NA
AFF1_HUMAN	P51825	AF4/FMR2 family member 1	AFF1	G-6599_DMSO_60min	0.0717184	0.090039	15.932	0.437436	0.980183	NA
AFF4_HUMAN	Q9UHB7	AF4/FMR2 family member 4	AFF4	G-6599_DMSO_30min	-0.0708744	0.0600238	15.932	0.255022	0.870404	NA
AFF4_HUMAN	Q9UHB7	AF4/FMR2 family member 4	AFF4	G-6599_DMSO_60min	-0.0157854	0.0600238	15.932	0.795932	0.994708	NA
AFG1L_HUMAN	Q8WV93	NA	NA	G-6599_DMSO_30min	0.021315	0.11612	15.932	0.856674	0.976473	NA
AFG1L_HUMAN	Q8WV93	NA	NA	G-6599_DMSO_60min	-0.306171	0.11612	15.932	0.0179968	0.876229	NA
AFG32_HUMAN	Q9Y4W6	AFG3-like protein 2	AFG3L2	G-6599_DMSO_30min	-0.0720876	0.121832	15.932	0.562355	0.93498	NA
AFG32_HUMAN	Q9Y4W6	AFG3-like protein 2	AFG3L2	G-6599_DMSO_60min	-0.16153	0.121832	15.932	0.203586	0.957205	NA
AFTIN_HUMAN	Q6ULP2	Aftiphilin	AFTPH	G-6599_DMSO_60min	0.0223168	0.0868077	15.932	0.800406	0.994708	NA
AFTIN_HUMAN	Q6ULP2	Aftiphilin	AFTPH	G-6599_DMSO_30min	0.107484	0.0868077	15.932	0.233582	0.861357	NA
AG10A_HUMAN	Q5BKT4	Dol-P-Glc:Glc(2)Man(9)GlcNAc(2)-PP-Dol alpha-1,2-glucosyltransferase	ALG10	G-6599_DMSO_30min	0.0269847	0.125949	15.932	0.83307	0.972552	NA
AG10A_HUMAN	Q5BKT4	Dol-P-Glc:Glc(2)Man(9)GlcNAc(2)-PP-Dol alpha-1,2-glucosyltransferase	ALG10	G-6599_DMSO_60min	-0.192809	0.125949	15.932	0.145421	0.935452	NA
AGAL_HUMAN	P06280	Alpha-galactosidase A	GLA	G-6599_DMSO_30min	0.338906	0.202065	15.932	0.113008	0.806011	NA
AGAL_HUMAN	P06280	Alpha-galactosidase A	GLA	G-6599_DMSO_60min	0.0357259	0.202065	15.932	0.861891	0.996127	NA
AGAP1_HUMAN	Q9UPQ3	Arf-GAP with GTPase, ANK repeat and PH domain-containing protein 1	AGAP1	G-6599_DMSO_30min	-0.123009	0.0792602	15.932	0.140306	0.826024	NA
AGAP1_HUMAN	Q9UPQ3	Arf-GAP with GTPase, ANK repeat and PH domain-containing protein 1	AGAP1	G-6599_DMSO_60min	0.0331748	0.0792602	15.932	0.681129	0.987123	NA
AGAP3_HUMAN	Q96P47	Arf-GAP with GTPase, ANK repeat and PH domain-containing protein 3	AGAP3	G-6599_DMSO_60min	-0.143852	0.1247	15.932	0.265683	0.957205	NA
AGAP3_HUMAN	Q96P47	Arf-GAP with GTPase, ANK repeat and PH domain-containing protein 3	AGAP3	G-6599_DMSO_30min	0.0438823	0.1247	15.932	0.729522	0.957689	NA
AGFG1_HUMAN	P52594	Arf-GAP domain and FG repeat-containing protein 1	AGFG1	G-6599_DMSO_60min	0.00969442	0.0917948	15.932	0.91721	0.996995	NA
AGFG1_HUMAN	P52594	Arf-GAP domain and FG repeat-containing protein 1	AGFG1	G-6599_DMSO_30min	-0.0393807	0.0917948	15.932	0.673662	0.951526	NA
AGFG2_HUMAN	O95081	Arf-GAP domain and FG repeat-containing protein 2	AGFG2	G-6599_DMSO_30min	0.0871946	0.0803523	15.932	0.294001	0.870404	NA
AGFG2_HUMAN	O95081	Arf-GAP domain and FG repeat-containing protein 2	AGFG2	G-6599_DMSO_60min	0.0151273	0.0803523	15.932	0.853049	0.994708	NA
AGGF1_HUMAN	Q8N302	Angiogenic factor with G patch and FHA domains 1	AGGF1	G-6599_DMSO_30min	0.024547	0.0649305	15.932	0.710382	0.95628	NA
AGGF1_HUMAN	Q8N302	Angiogenic factor with G patch and FHA domains 1	AGGF1	G-6599_DMSO_60min	0.0732291	0.0649305	15.932	0.2761	0.961247	NA
AGK_HUMAN	Q53H12	Acylglycerol kinase, mitochondrial	AGK	G-6599_DMSO_60min	-0.29996	0.19124	15.932	0.136409	0.934825	NA
AGK_HUMAN	Q53H12	Acylglycerol kinase, mitochondrial	AGK	G-6599_DMSO_30min	-0.144294	0.19124	15.932	0.461545	0.913546	NA
AGM1_HUMAN	O95394	Phosphoacetylglucosamine mutase	PGM3	G-6599_DMSO_60min	0.0352095	0.073038	15.932	0.636311	0.986136	NA
AGM1_HUMAN	O95394	Phosphoacetylglucosamine mutase	PGM3	G-6599_DMSO_30min	-0.117517	0.073038	15.932	0.127253	0.817854	NA
AGO1_HUMAN	Q9UL18	Protein argonaute-1	AGO1	G-6599_DMSO_60min	0.0999556	0.0563385	15.932	0.0951396	0.934825	NA
AGO1_HUMAN	Q9UL18	Protein argonaute-1	AGO1	G-6599_DMSO_30min	-0.050839	0.0563385	15.932	0.380293	0.896493	NA
AGO2_HUMAN	Q9UKV8	Protein argonaute-2	AGO2	G-6599_DMSO_30min	0.0616265	0.0739433	15.932	0.416923	0.906269	NA
AGO2_HUMAN	Q9UKV8	Protein argonaute-2	AGO2	G-6599_DMSO_60min	0.0146909	0.0739433	15.932	0.845027	0.994708	NA
AGO3_HUMAN	Q9H9G7	Protein argonaute-3	AGO3	G-6599_DMSO_60min	0.207882	0.164586	15.932	0.224742	0.957205	NA
AGO3_HUMAN	Q9H9G7	Protein argonaute-3	AGO3	G-6599_DMSO_30min	0.280543	0.164586	15.932	0.107702	0.802807	NA
AGO4_HUMAN	Q9HCK5	Protein argonaute-4	AGO4	G-6599_DMSO_60min	0.275455	0.077913	15.932	0.00276547	0.401828	NA
AGO4_HUMAN	Q9HCK5	Protein argonaute-4	AGO4	G-6599_DMSO_30min	-0.0265058	0.077913	15.932	0.738152	0.958559	NA
AGRA3_HUMAN	Q8IWK6	NA	NA	G-6599_DMSO_30min	0.190147	0.0736546	15.932	0.0201255	0.620447	NA
AGRA3_HUMAN	Q8IWK6	NA	NA	G-6599_DMSO_60min	-0.0727967	0.0736546	15.932	0.337754	0.973968	NA
AGRE2_HUMAN	Q9UHX3	NA	NA	G-6599_DMSO_60min	-0.120826	0.0982302	15.932	0.23654	0.957205	NA
AGRE2_HUMAN	Q9UHX3	NA	NA	G-6599_DMSO_30min	0.0677569	0.0982302	15.932	0.500259	0.920487	NA
AGRG2_HUMAN	Q8IZP9	NA	NA	G-6599_DMSO_30min	0.0280624	0.0736926	15.932	0.708379	0.956053	NA
AGRG2_HUMAN	Q8IZP9	NA	NA	G-6599_DMSO_60min	0.0691294	0.0736926	15.932	0.362209	0.973968	NA
AGRG2_HUMAN	Q8IZP9-9	NA	NA	G-6599_DMSO_30min	0.125949	0.134678	15.932	0.363651	0.892899	NA
AGRG2_HUMAN	Q8IZP9-9	NA	NA	G-6599_DMSO_60min	0.226002	0.134678	15.932	0.112834	0.934825	NA
AGRG6_HUMAN	Q86SQ4	NA	NA	G-6599_DMSO_30min	0.173955	0.0876806	15.932	0.0647644	0.743939	NA
AGRG6_HUMAN	Q86SQ4	NA	NA	G-6599_DMSO_60min	-0.00424912	0.0876806	15.932	0.961951	0.997895	NA
AGRG6_HUMAN	Q86SQ4-3	NA	NA	G-6599_DMSO_30min	-0.142033	0.161454	15.932	0.39209	0.899011	NA
AGRG6_HUMAN	Q86SQ4-3	NA	NA	G-6599_DMSO_60min	-0.194681	0.161454	15.932	0.245496	0.957205	NA
AGRIN_HUMAN	O00468	Agrin	AGRN	G-6599_DMSO_60min	0.0486224	0.113591	15.932	0.674347	0.987123	NA
AGRIN_HUMAN	O00468	Agrin	AGRN	G-6599_DMSO_30min	-0.0860177	0.113591	15.932	0.459951	0.913465	NA
AGRL1_HUMAN	O94910	NA	NA	G-6599_DMSO_30min	0.13766	0.120149	15.932	0.268819	0.870404	NA
AGRL1_HUMAN	O94910	NA	NA	G-6599_DMSO_60min	-0.0471957	0.120149	15.932	0.699665	0.988501	NA
AGRL2_HUMAN	O95490	NA	NA	G-6599_DMSO_30min	0.110773	0.0784973	15.932	0.177425	0.834008	NA
AGRL2_HUMAN	O95490	NA	NA	G-6599_DMSO_60min	-0.0232235	0.0784973	15.932	0.771165	0.994708	NA
AHDC1_HUMAN	Q5TGY3	AT-hook DNA-binding motif-containing protein 1	AHDC1	G-6599_DMSO_60min	0.00184129	0.0706275	15.932	0.979525	0.99975	NA
AHDC1_HUMAN	Q5TGY3	AT-hook DNA-binding motif-containing protein 1	AHDC1	G-6599_DMSO_30min	0.144408	0.0706275	15.932	0.0577785	0.740595	NA
AHI1_HUMAN	Q8N157	Jouberin	AHI1	G-6599_DMSO_60min	0.118858	0.112215	15.932	0.305303	0.973968	NA
AHI1_HUMAN	Q8N157	Jouberin	AHI1	G-6599_DMSO_30min	-0.0454538	0.112215	15.932	0.690819	0.954814	NA
AHNK_HUMAN	Q09666	Neuroblast differentiation-associated protein AHNAK	AHNAK	G-6599_DMSO_30min	-0.141646	0.0856107	15.932	0.117581	0.810503	NA
AHNK_HUMAN	Q09666	Neuroblast differentiation-associated protein AHNAK	AHNAK	G-6599_DMSO_60min	0.120304	0.0856107	15.932	0.179147	0.948862	NA
AHNK_HUMAN	Q09666-2	Neuroblast differentiation-associated protein AHNAK (isoform 2)	AHNAK	G-6599_DMSO_60min	0.0152063	0.171638	15.932	0.930508	0.996995	NA
AHNK_HUMAN	Q09666-2	Neuroblast differentiation-associated protein AHNAK (isoform 2)	AHNAK	G-6599_DMSO_30min	0.243657	0.171638	15.932	0.174996	0.834008	NA
AHNK2_HUMAN	Q8IVF2	Protein AHNAK2	AHNAK2	G-6599_DMSO_60min	0.127814	0.0909602	15.932	0.17917	0.948862	NA
AHNK2_HUMAN	Q8IVF2	Protein AHNAK2	AHNAK2	G-6599_DMSO_30min	0.095131	0.0909602	15.932	0.311238	0.87702	NA
AHR_HUMAN	P35869	Aryl hydrocarbon receptor	AHR	G-6599_DMSO_60min	-0.0524539	0.0814508	15.932	0.528742	0.983099	NA
AHR_HUMAN	P35869	Aryl hydrocarbon receptor	AHR	G-6599_DMSO_30min	-0.0100954	0.0814508	15.932	0.90291	0.98622	NA
AHSA1_HUMAN	O95433	Activator of 90 kDa heat shock protein ATPase homolog 1	AHSA1	G-6599_DMSO_30min	-0.0577702	0.0911503	15.932	0.535212	0.927849	NA
AHSA1_HUMAN	O95433	Activator of 90 kDa heat shock protein ATPase homolog 1	AHSA1	G-6599_DMSO_60min	0.0438742	0.0911503	15.932	0.63682	0.986136	NA
AIDA_HUMAN	Q96BJ3	Axin interactor, dorsalization-associated protein	AIDA	G-6599_DMSO_60min	0.0317399	0.0831706	15.932	0.707782	0.988501	NA
AIDA_HUMAN	Q96BJ3	Axin interactor, dorsalization-associated protein	AIDA	G-6599_DMSO_30min	-0.138152	0.0831706	15.932	0.116249	0.809167	NA
AIF1L_HUMAN	Q9BQI0	Allograft inflammatory factor 1-like	AIF1L	G-6599_DMSO_60min	0.0301974	0.0635831	15.932	0.641283	0.986136	NA
AIF1L_HUMAN	Q9BQI0	Allograft inflammatory factor 1-like	AIF1L	G-6599_DMSO_30min	0.0625398	0.0635831	15.932	0.340018	0.887798	NA
AIFM1_HUMAN	O95831	Apoptosis-inducing factor 1, mitochondrial	AIFM1	G-6599_DMSO_30min	-0.0734079	0.14341	15.932	0.61576	0.941819	NA
AIFM1_HUMAN	O95831	Apoptosis-inducing factor 1, mitochondrial	AIFM1	G-6599_DMSO_60min	0.0408672	0.14341	15.932	0.77934	0.994708	NA
AIMP1_HUMAN	Q12904	Aminoacyl tRNA synthase complex-interacting multifunctional protein 1	AIMP1	G-6599_DMSO_30min	0.0749367	0.162229	15.932	0.650383	0.945161	NA
AIMP1_HUMAN	Q12904	Aminoacyl tRNA synthase complex-interacting multifunctional protein 1	AIMP1	G-6599_DMSO_60min	0.0589675	0.162229	15.932	0.721022	0.989908	NA
AIMP2_HUMAN	Q13155	Aminoacyl tRNA synthase complex-interacting multifunctional protein 2	AIMP2	G-6599_DMSO_60min	-0.0336374	0.0603482	15.932	0.585009	0.986136	NA
AIMP2_HUMAN	Q13155	Aminoacyl tRNA synthase complex-interacting multifunctional protein 2	AIMP2	G-6599_DMSO_30min	-0.0232391	0.0603482	15.932	0.705268	0.955538	NA
AIMP2_HUMAN	Q13155-2	NA	NA	G-6599_DMSO_30min	-0.0833626	0.0978787	15.932	0.407005	0.903362	NA
AIMP2_HUMAN	Q13155-2	NA	NA	G-6599_DMSO_60min	-0.115823	0.0978787	15.932	0.254034	0.957205	NA
AINX_HUMAN	Q16352	Alpha-internexin	INA	G-6599_DMSO_60min	-0.0514998	0.141526	15.932	0.720725	0.989908	NA
AINX_HUMAN	Q16352	Alpha-internexin	INA	G-6599_DMSO_30min	-0.045435	0.141526	15.932	0.752356	0.958559	NA
AIP_HUMAN	O00170	AH receptor-interacting protein	AIP	G-6599_DMSO_30min	0.0300688	0.0819939	15.932	0.718653	0.957221	NA
AIP_HUMAN	O00170	AH receptor-interacting protein	AIP	G-6599_DMSO_60min	0.120705	0.0819939	15.932	0.160466	0.941362	NA
AJUBA_HUMAN	Q96IF1	LIM domain-containing protein ajuba	AJUBA	G-6599_DMSO_30min	-0.0158304	0.068977	15.932	0.821399	0.970424	NA
AJUBA_HUMAN	Q96IF1	LIM domain-containing protein ajuba	AJUBA	G-6599_DMSO_60min	0.0395281	0.068977	15.932	0.574602	0.985849	NA
AK17A_HUMAN	Q02040	A-kinase anchor protein 17A	AKAP17A	G-6599_DMSO_30min	0.0860684	0.0610656	15.932	0.177926	0.834008	NA
AK17A_HUMAN	Q02040	A-kinase anchor protein 17A	AKAP17A	G-6599_DMSO_60min	-0.00946973	0.0610656	15.932	0.87871	0.996427	NA
AK1A1_HUMAN	P14550	Alcohol dehydrogenase [NADP(+)]	AKR1A1	G-6599_DMSO_60min	0.14202	0.114765	15.932	0.233837	0.957205	NA
AK1A1_HUMAN	P14550	Alcohol dehydrogenase [NADP(+)]	AKR1A1	G-6599_DMSO_30min	-0.146594	0.114765	15.932	0.219784	0.857284	NA
AK1BF_HUMAN	C9JRZ8	Aldo-keto reductase family 1 member B15	AKR1B15	G-6599_DMSO_60min	0.0569002	0.0999251	15.932	0.577007	0.986136	NA
AK1BF_HUMAN	C9JRZ8	Aldo-keto reductase family 1 member B15	AKR1B15	G-6599_DMSO_30min	0.00569031	0.0999251	15.932	0.955297	0.992026	NA
AKA10_HUMAN	O43572	A-kinase anchor protein 10, mitochondrial	AKAP10	G-6599_DMSO_30min	-0.0794104	0.100584	15.932	0.441416	0.909483	NA
AKA10_HUMAN	O43572	A-kinase anchor protein 10, mitochondrial	AKAP10	G-6599_DMSO_60min	-0.0375922	0.100584	15.932	0.713525	0.989022	NA
AKA11_HUMAN	Q9UKA4	A-kinase anchor protein 11	AKAP11	G-6599_DMSO_30min	-0.0626009	0.0657173	15.932	0.355033	0.891233	NA
AKA11_HUMAN	Q9UKA4	A-kinase anchor protein 11	AKAP11	G-6599_DMSO_60min	0.076786	0.0657173	15.932	0.259821	0.957205	NA
AKA12_HUMAN	Q02952	A-kinase anchor protein 12	AKAP12	G-6599_DMSO_30min	-0.126212	0.0852622	15.932	0.1583	0.833394	NA
AKA12_HUMAN	Q02952	A-kinase anchor protein 12	AKAP12	G-6599_DMSO_60min	0.129652	0.0852622	15.932	0.147949	0.935452	NA
AKAP1_HUMAN	Q92667	A-kinase anchor protein 1, mitochondrial	AKAP1	G-6599_DMSO_30min	0.0227408	0.117847	15.932	0.849422	0.975023	NA
AKAP1_HUMAN	Q92667	A-kinase anchor protein 1, mitochondrial	AKAP1	G-6599_DMSO_60min	-0.0904862	0.117847	15.932	0.45382	0.982449	NA
AKAP2_HUMAN	Q9Y2D5	A-kinase anchor protein 2	AKAP2	G-6599_DMSO_30min	-0.00973785	0.15156	15.932	0.94957	0.991979	NA
AKAP2_HUMAN	Q9Y2D5	A-kinase anchor protein 2	AKAP2	G-6599_DMSO_60min	0.132002	0.15156	15.932	0.396711	0.973968	NA
AKAP8_HUMAN	O43823	A-kinase anchor protein 8	AKAP8	G-6599_DMSO_60min	0.0145139	0.0740792	15.932	0.847147	0.994708	NA
AKAP8_HUMAN	O43823	A-kinase anchor protein 8	AKAP8	G-6599_DMSO_30min	0.146062	0.0740792	15.932	0.066265	0.743939	NA
AKAP9_HUMAN	Q99996	A-kinase anchor protein 9	AKAP9	G-6599_DMSO_60min	0.0762137	0.0868765	15.932	0.39338	0.973968	NA
AKAP9_HUMAN	Q99996	A-kinase anchor protein 9	AKAP9	G-6599_DMSO_30min	0.200534	0.0868765	15.932	0.0347389	0.702474	NA
AKIB1_HUMAN	Q9P2G1	Ankyrin repeat and IBR domain-containing protein 1	ANKIB1	G-6599_DMSO_60min	0.0297391	0.091499	15.932	0.749394	0.994708	NA
AKIB1_HUMAN	Q9P2G1	Ankyrin repeat and IBR domain-containing protein 1	ANKIB1	G-6599_DMSO_30min	-0.0106806	0.091499	15.932	0.908534	0.98622	NA
AKIP_HUMAN	Q9NWT8	Aurora kinase A-interacting protein	AURKAIP1	G-6599_DMSO_30min	-0.117896	0.191629	15.932	0.547092	0.930884	NA
AKIP_HUMAN	Q9NWT8	Aurora kinase A-interacting protein	AURKAIP1	G-6599_DMSO_60min	-0.236538	0.191629	15.932	0.234969	0.957205	NA
AKIR1_HUMAN	Q9H9L7	Akirin-1	AKIRIN1	G-6599_DMSO_60min	0.0463105	0.0812832	15.932	0.576799	0.986136	NA
AKIR1_HUMAN	Q9H9L7	Akirin-1	AKIRIN1	G-6599_DMSO_30min	-0.0728941	0.0812832	15.932	0.383181	0.898013	NA
AKIR2_HUMAN	Q53H80	Akirin-2	AKIRIN2	G-6599_DMSO_30min	-0.141205	0.0682052	15.932	0.055038	0.738712	NA
AKIR2_HUMAN	Q53H80	Akirin-2	AKIRIN2	G-6599_DMSO_60min	-0.0965269	0.0682052	15.932	0.176247	0.948862	NA
AKNA_HUMAN	Q7Z591	AT-hook-containing transcription factor	AKNA	G-6599_DMSO_60min	0.0559428	0.0890133	15.932	0.538598	0.983099	NA
AKNA_HUMAN	Q7Z591	AT-hook-containing transcription factor	AKNA	G-6599_DMSO_30min	0.341251	0.0890133	15.932	0.00147489	0.290357	NA
AKP13_HUMAN	Q12802	A-kinase anchor protein 13	AKAP13	G-6599_DMSO_30min	-0.0359415	0.0725527	15.932	0.627092	0.944526	NA
AKP13_HUMAN	Q12802	A-kinase anchor protein 13	AKAP13	G-6599_DMSO_60min	-0.0196736	0.0725527	15.932	0.789748	0.994708	NA
AKP8L_HUMAN	Q9ULX6	A-kinase anchor protein 8-like	AKAP8L	G-6599_DMSO_60min	0.0531256	0.054897	15.932	0.34764	0.973968	NA
AKP8L_HUMAN	Q9ULX6	A-kinase anchor protein 8-like	AKAP8L	G-6599_DMSO_30min	0.0391956	0.054897	15.932	0.485566	0.919405	NA
AKT1_HUMAN	P31749	RAC-alpha serine/threonine-protein kinase	AKT1	G-6599_DMSO_30min	-0.0273504	0.0840307	15.932	0.749052	0.958559	NA
AKT1_HUMAN	P31749	RAC-alpha serine/threonine-protein kinase	AKT1	G-6599_DMSO_60min	0.0164095	0.0840307	15.932	0.847642	0.994708	NA
AKT2_HUMAN	P31751	RAC-beta serine/threonine-protein kinase	AKT2	G-6599_DMSO_30min	0.125578	0.0844669	15.932	0.156614	0.833394	NA
AKT2_HUMAN	P31751	RAC-beta serine/threonine-protein kinase	AKT2	G-6599_DMSO_60min	0.0749341	0.0844669	15.932	0.388199	0.973968	NA
AKT3_HUMAN	Q9Y243	RAC-gamma serine/threonine-protein kinase	AKT3	G-6599_DMSO_30min	-0.0109748	0.113647	15.932	0.924272	0.987299	NA
AKT3_HUMAN	Q9Y243	RAC-gamma serine/threonine-protein kinase	AKT3	G-6599_DMSO_60min	0.11273	0.113647	15.932	0.336058	0.973968	NA
AKTIP_HUMAN	Q9H8T0	AKT-interacting protein	AKTIP	G-6599_DMSO_60min	0.0493963	0.08614	15.932	0.574352	0.985849	NA
AKTIP_HUMAN	Q9H8T0	AKT-interacting protein	AKTIP	G-6599_DMSO_30min	-0.0280416	0.08614	15.932	0.749012	0.958559	NA
AKTS1_HUMAN	Q96B36	Proline-rich AKT1 substrate 1	AKT1S1	G-6599_DMSO_30min	0.0380358	0.0972368	15.932	0.700856	0.955538	NA
AKTS1_HUMAN	Q96B36	Proline-rich AKT1 substrate 1	AKT1S1	G-6599_DMSO_60min	-0.0230002	0.0972368	15.932	0.816029	0.994708	NA
AL14E_HUMAN	Q8N8R7	ARL14 effector protein	ARL14EP	G-6599_DMSO_30min	-0.0273596	0.112817	15.932	0.811478	0.969174	NA
AL14E_HUMAN	Q8N8R7	ARL14 effector protein	ARL14EP	G-6599_DMSO_60min	0.180604	0.112817	15.932	0.129048	0.934825	NA
AL1A1_HUMAN	P00352	Retinal dehydrogenase 1	ALDH1A1	G-6599_DMSO_30min	-0.133896	0.142095	15.932	0.360111	0.891406	NA
AL1A1_HUMAN	P00352	Retinal dehydrogenase 1	ALDH1A1	G-6599_DMSO_60min	-0.264438	0.142095	15.932	0.0813009	0.914593	NA
AL1A2_HUMAN	O94788	Retinal dehydrogenase 2	ALDH1A2	G-6599_DMSO_60min	-0.105035	0.0980642	15.932	0.30009	0.973968	NA
AL1A2_HUMAN	O94788	Retinal dehydrogenase 2	ALDH1A2	G-6599_DMSO_30min	-0.00851598	0.0980642	15.932	0.93188	0.989825	NA
AL1A3_HUMAN	P47895	Aldehyde dehydrogenase family 1 member A3	ALDH1A3	G-6599_DMSO_30min	-0.0233124	0.102846	15.932	0.82356	0.971219	NA
AL1A3_HUMAN	P47895	Aldehyde dehydrogenase family 1 member A3	ALDH1A3	G-6599_DMSO_60min	0.0461493	0.102846	15.932	0.659675	0.986136	NA
AL1B1_HUMAN	P30837	Aldehyde dehydrogenase X, mitochondrial	ALDH1B1	G-6599_DMSO_30min	-0.0945349	0.220713	15.932	0.674156	0.951799	NA
AL1B1_HUMAN	P30837	Aldehyde dehydrogenase X, mitochondrial	ALDH1B1	G-6599_DMSO_60min	-0.272292	0.220713	15.932	0.235209	0.957205	NA
AL1L2_HUMAN	Q3SY69	Mitochondrial 10-formyltetrahydrofolate dehydrogenase	ALDH1L2	G-6599_DMSO_30min	0.0510269	0.127958	15.932	0.695351	0.955538	NA
AL1L2_HUMAN	Q3SY69	Mitochondrial 10-formyltetrahydrofolate dehydrogenase	ALDH1L2	G-6599_DMSO_60min	-0.140771	0.127958	15.932	0.287618	0.966033	NA
AL3A2_HUMAN	P51648	Fatty aldehyde dehydrogenase	ALDH3A2	G-6599_DMSO_30min	0.163351	0.0902334	15.932	0.0891466	0.782504	NA
AL3A2_HUMAN	P51648	Fatty aldehyde dehydrogenase	ALDH3A2	G-6599_DMSO_60min	-0.0782066	0.0902334	15.932	0.398964	0.973968	NA
AL3B1_HUMAN	P43353	Aldehyde dehydrogenase family 3 member B1	ALDH3B1	G-6599_DMSO_60min	-0.119731	0.0709191	15.932	0.110833	0.934825	NA
AL3B1_HUMAN	P43353	Aldehyde dehydrogenase family 3 member B1	ALDH3B1	G-6599_DMSO_30min	0.0406048	0.0709191	15.932	0.574941	0.936645	NA
AL4A1_HUMAN	P30038	Delta-1-pyrroline-5-carboxylate dehydrogenase, mitochondrial	ALDH4A1	G-6599_DMSO_30min	-0.0383393	0.167138	15.932	0.821487	0.970424	NA
AL4A1_HUMAN	P30038	Delta-1-pyrroline-5-carboxylate dehydrogenase, mitochondrial	ALDH4A1	G-6599_DMSO_60min	-0.200889	0.167138	15.932	0.246952	0.957205	NA
AL7A1_HUMAN	P49419	Alpha-aminoadipic semialdehyde dehydrogenase	ALDH7A1	G-6599_DMSO_60min	-0.123953	0.0733338	15.932	0.110446	0.934825	NA
AL7A1_HUMAN	P49419	Alpha-aminoadipic semialdehyde dehydrogenase	ALDH7A1	G-6599_DMSO_30min	-0.0494169	0.0733338	15.932	0.510058	0.920487	NA
AL7A1_HUMAN	P49419-2	Alpha-aminoadipic semialdehyde dehydrogenase (isoform 2)	ALDH7A1	G-6599_DMSO_30min	-0.109058	0.146964	15.932	0.468843	0.915872	NA
AL7A1_HUMAN	P49419-2	Alpha-aminoadipic semialdehyde dehydrogenase (isoform 2)	ALDH7A1	G-6599_DMSO_60min	-0.187588	0.146964	15.932	0.220098	0.957205	NA
AL9A1_HUMAN	P49189	4-trimethylaminobutyraldehyde dehydrogenase	ALDH9A1	G-6599_DMSO_60min	-0.0462933	0.0740404	15.932	0.540664	0.983099	NA
AL9A1_HUMAN	P49189	4-trimethylaminobutyraldehyde dehydrogenase	ALDH9A1	G-6599_DMSO_30min	-0.140179	0.0740404	15.932	0.0766304	0.755398	NA
ALAT2_HUMAN	Q8TD30	Alanine aminotransferase 2	GPT2	G-6599_DMSO_60min	-0.206425	0.123642	15.932	0.114538	0.934825	NA
ALAT2_HUMAN	Q8TD30	Alanine aminotransferase 2	GPT2	G-6599_DMSO_30min	0.0716527	0.123642	15.932	0.570344	0.936266	NA
ALBU_BOVINC	GC0015	NA	NA	G-6599_DMSO_60min	-0.617355	0.419558	15.932	0.160648	0.941362	NA
ALBU_BOVINC	GC0015	NA	NA	G-6599_DMSO_30min	0.232045	0.419558	15.932	0.587892	0.93774	NA
ALBU_HUMAN	P02768	Serum albumin	ALB	G-6599_DMSO_30min	0.546413	0.296	15.932	0.0835583	0.776925	NA
ALBU_HUMAN	P02768	Serum albumin	ALB	G-6599_DMSO_60min	-0.570966	0.296	15.932	0.0717488	0.907189	NA
ALDH2_HUMAN	P05091	Aldehyde dehydrogenase, mitochondrial	ALDH2	G-6599_DMSO_30min	-0.0816098	0.163839	15.932	0.625212	0.944441	NA
ALDH2_HUMAN	P05091	Aldehyde dehydrogenase, mitochondrial	ALDH2	G-6599_DMSO_60min	-0.21385	0.163839	15.932	0.210346	0.957205	NA
ALDOA_HUMAN	P04075	Fructose-bisphosphate aldolase A	ALDOA	G-6599_DMSO_30min	-0.223618	0.0679102	15.932	0.00460942	0.377395	NA
ALDOA_HUMAN	P04075	Fructose-bisphosphate aldolase A	ALDOA	G-6599_DMSO_60min	0.0223894	0.0679102	15.932	0.745928	0.994708	NA
ALDOC_HUMAN	P09972	Fructose-bisphosphate aldolase C	ALDOC	G-6599_DMSO_60min	0.0996365	0.0784549	15.932	0.222326	0.957205	NA
ALDOC_HUMAN	P09972	Fructose-bisphosphate aldolase C	ALDOC	G-6599_DMSO_30min	-0.155397	0.0784549	15.932	0.0651588	0.743939	NA
ALDR_HUMAN	P15121	Aldose reductase	AKR1B1	G-6599_DMSO_30min	-0.95848	0.590284	8.93199	0.139131	0.826024	NA
ALDR_HUMAN	P15121	Aldose reductase	AKR1B1	G-6599_DMSO_60min	0.584292	0.340801	8.93199	0.120843	0.934825	NA
ALG1_HUMAN	Q9BT22	Chitobiosyldiphosphodolichol beta-mannosyltransferase	ALG1	G-6599_DMSO_30min	0.0777707	0.0899579	15.932	0.40013	0.899572	NA
ALG1_HUMAN	Q9BT22	Chitobiosyldiphosphodolichol beta-mannosyltransferase	ALG1	G-6599_DMSO_60min	-0.0052503	0.0899579	15.932	0.954184	0.997441	NA
ALG11_HUMAN	Q2TAA5	GDP-Man:Man(3)GlcNAc(2)-PP-Dol alpha-1,2-mannosyltransferase	ALG11	G-6599_DMSO_60min	-0.0544501	0.0857427	15.932	0.534417	0.983099	NA
ALG11_HUMAN	Q2TAA5	GDP-Man:Man(3)GlcNAc(2)-PP-Dol alpha-1,2-mannosyltransferase	ALG11	G-6599_DMSO_30min	-0.0369407	0.0857427	15.932	0.672362	0.95144	NA
ALG12_HUMAN	Q9BV10	Dol-P-Man:Man(7)GlcNAc(2)-PP-Dol alpha-1,6-mannosyltransferase	ALG12	G-6599_DMSO_30min	0.0411757	0.108221	15.932	0.708614	0.956065	NA
ALG12_HUMAN	Q9BV10	Dol-P-Man:Man(7)GlcNAc(2)-PP-Dol alpha-1,6-mannosyltransferase	ALG12	G-6599_DMSO_60min	-0.169023	0.108221	15.932	0.137968	0.934825	NA
ALG14_HUMAN	Q96F25	UDP-N-acetylglucosamine transferase subunit ALG14 homolog	ALG14	G-6599_DMSO_30min	0.139448	0.0985713	15.932	0.176405	0.834008	NA
ALG14_HUMAN	Q96F25	UDP-N-acetylglucosamine transferase subunit ALG14 homolog	ALG14	G-6599_DMSO_60min	-0.0351413	0.0985713	15.932	0.726139	0.991218	NA
ALG2_HUMAN	Q9H553	Alpha-1,3/1,6-mannosyltransferase ALG2	ALG2	G-6599_DMSO_30min	0.0644332	0.0738341	15.932	0.395803	0.899572	NA
ALG2_HUMAN	Q9H553	Alpha-1,3/1,6-mannosyltransferase ALG2	ALG2	G-6599_DMSO_60min	0.0427539	0.0738341	15.932	0.57065	0.985139	NA
ALG3_HUMAN	Q92685	Dol-P-Man:Man(5)GlcNAc(2)-PP-Dol alpha-1,3-mannosyltransferase	ALG3	G-6599_DMSO_30min	-0.0325639	0.175179	15.932	0.854878	0.975747	NA
ALG3_HUMAN	Q92685	Dol-P-Man:Man(5)GlcNAc(2)-PP-Dol alpha-1,3-mannosyltransferase	ALG3	G-6599_DMSO_60min	-0.388207	0.175179	15.932	0.0415974	0.907189	NA
ALG5_HUMAN	Q9Y673	Dolichyl-phosphate beta-glucosyltransferase	ALG5	G-6599_DMSO_30min	0.110068	0.0846326	15.932	0.211916	0.850467	NA
ALG5_HUMAN	Q9Y673	Dolichyl-phosphate beta-glucosyltransferase	ALG5	G-6599_DMSO_60min	-0.0359223	0.0846326	15.932	0.676914	0.987123	NA
ALG9_HUMAN	Q9H6U8	Alpha-1,2-mannosyltransferase ALG9	ALG9	G-6599_DMSO_30min	0.234513	0.111144	15.932	0.0510285	0.73288	NA
ALG9_HUMAN	Q9H6U8	Alpha-1,2-mannosyltransferase ALG9	ALG9	G-6599_DMSO_60min	-0.0535451	0.111144	15.932	0.636525	0.986136	NA
ALKB1_HUMAN	Q13686	Alkylated DNA repair protein alkB homolog 1	ALKBH1	G-6599_DMSO_60min	-0.204792	0.0959314	15.932	0.048664	0.907189	NA
ALKB1_HUMAN	Q13686	Alkylated DNA repair protein alkB homolog 1	ALKBH1	G-6599_DMSO_30min	-0.186561	0.0959314	15.932	0.069678	0.743939	NA
ALKB2_HUMAN	Q6NS38	Alpha-ketoglutarate-dependent dioxygenase alkB homolog 2	ALKBH2	G-6599_DMSO_30min	0.140778	0.0691705	15.932	0.0588143	0.740595	NA
ALKB2_HUMAN	Q6NS38	Alpha-ketoglutarate-dependent dioxygenase alkB homolog 2	ALKBH2	G-6599_DMSO_60min	-0.0160247	0.0691705	15.932	0.819743	0.994708	NA
ALKB3_HUMAN	Q96Q83	Alpha-ketoglutarate-dependent dioxygenase alkB homolog 3	ALKBH3	G-6599_DMSO_60min	0.0610943	0.0871803	15.932	0.493549	0.983099	NA
ALKB3_HUMAN	Q96Q83	Alpha-ketoglutarate-dependent dioxygenase alkB homolog 3	ALKBH3	G-6599_DMSO_30min	-0.0178331	0.0871803	15.932	0.840511	0.973733	NA
ALKB4_HUMAN	Q9NXW9	Alpha-ketoglutarate-dependent dioxygenase alkB homolog 4	ALKBH4	G-6599_DMSO_60min	0.0898679	0.104537	15.932	0.40272	0.973968	NA
ALKB4_HUMAN	Q9NXW9	Alpha-ketoglutarate-dependent dioxygenase alkB homolog 4	ALKBH4	G-6599_DMSO_30min	0.0800745	0.104537	15.932	0.454883	0.910237	NA
ALKB5_HUMAN	Q6P6C2	RNA demethylase ALKBH5	ALKBH5	G-6599_DMSO_30min	-0.00262227	0.104838	15.932	0.980356	0.996004	NA
ALKB5_HUMAN	Q6P6C2	RNA demethylase ALKBH5	ALKBH5	G-6599_DMSO_60min	0.0785602	0.104838	15.932	0.46457	0.982449	NA
ALKB6_HUMAN	Q3KRA9	Alpha-ketoglutarate-dependent dioxygenase alkB homolog 6	ALKBH6	G-6599_DMSO_30min	-0.214552	0.132989	15.932	0.126306	0.816348	NA
ALKB6_HUMAN	Q3KRA9	Alpha-ketoglutarate-dependent dioxygenase alkB homolog 6	ALKBH6	G-6599_DMSO_60min	0.0383985	0.132989	15.932	0.776507	0.994708	NA
ALKB7_HUMAN	Q9BT30	Alpha-ketoglutarate-dependent dioxygenase alkB homolog 7, mitochondrial	ALKBH7	G-6599_DMSO_60min	-0.0762666	0.128498	15.932	0.561164	0.985139	NA
ALKB7_HUMAN	Q9BT30	Alpha-ketoglutarate-dependent dioxygenase alkB homolog 7, mitochondrial	ALKBH7	G-6599_DMSO_30min	-0.114261	0.128498	15.932	0.387125	0.898013	NA
ALMS1_HUMAN	Q8TCU4	Alstrom syndrome protein 1	ALMS1	G-6599_DMSO_60min	-0.0288422	0.0601507	15.932	0.638099	0.986136	NA
ALMS1_HUMAN	Q8TCU4	Alstrom syndrome protein 1	ALMS1	G-6599_DMSO_30min	-0.0314494	0.0601507	15.932	0.608279	0.9411	NA
ALPK2_HUMAN	Q86TB3	Alpha-protein kinase 2	ALPK2	G-6599_DMSO_30min	0.0991322	0.135256	15.932	0.474254	0.917401	NA
ALPK2_HUMAN	Q86TB3	Alpha-protein kinase 2	ALPK2	G-6599_DMSO_60min	-0.0587665	0.135256	15.932	0.669766	0.987123	NA
ALR_HUMAN	P55789	FAD-linked sulfhydryl oxidase ALR	GFER	G-6599_DMSO_30min	0.0898627	0.0696998	15.932	0.215705	0.853059	NA
ALR_HUMAN	P55789	FAD-linked sulfhydryl oxidase ALR	GFER	G-6599_DMSO_60min	0.141999	0.0696998	15.932	0.0585859	0.907189	NA
ALS2_HUMAN	Q96Q42	Alsin	ALS2	G-6599_DMSO_60min	0.031125	0.102735	15.932	0.765836	0.994708	NA
ALS2_HUMAN	Q96Q42	Alsin	ALS2	G-6599_DMSO_30min	0.0321254	0.102735	15.932	0.758562	0.958559	NA
AMACR_HUMAN	Q9UHK6	Alpha-methylacyl-CoA racemase	AMACR	G-6599_DMSO_30min	0.0586724	0.0753025	15.932	0.447307	0.909483	NA
AMACR_HUMAN	Q9UHK6	Alpha-methylacyl-CoA racemase	AMACR	G-6599_DMSO_60min	0.0480867	0.0753025	15.932	0.532169	0.983099	NA
AMD_HUMAN	P19021	Peptidyl-glycine alpha-amidating monooxygenase	PAM	G-6599_DMSO_60min	-0.0827423	0.0832024	15.932	0.334859	0.973968	NA
AMD_HUMAN	P19021	Peptidyl-glycine alpha-amidating monooxygenase	PAM	G-6599_DMSO_30min	0.0759053	0.0832024	15.932	0.375211	0.893483	NA
AMERL_HUMAN	Q6DCA0	AMMECR1-like protein	AMMECR1L	G-6599_DMSO_30min	0.0196864	0.0868417	15.932	0.823545	0.971219	NA
AMERL_HUMAN	Q6DCA0	AMMECR1-like protein	AMMECR1L	G-6599_DMSO_60min	0.104792	0.0868417	15.932	0.245162	0.957205	NA
AMFR_HUMAN	Q9UKV5	E3 ubiquitin-protein ligase AMFR	AMFR	G-6599_DMSO_30min	0.110301	0.109865	15.932	0.3304	0.884121	NA
AMFR_HUMAN	Q9UKV5	E3 ubiquitin-protein ligase AMFR	AMFR	G-6599_DMSO_60min	0.0571186	0.109865	15.932	0.610283	0.986136	NA
AMN1_HUMAN	Q8IY45	Protein AMN1 homolog	AMN1	G-6599_DMSO_30min	0.0567037	0.0814145	15.932	0.496164	0.920487	NA
AMN1_HUMAN	Q8IY45	Protein AMN1 homolog	AMN1	G-6599_DMSO_60min	0.136038	0.0814145	15.932	0.114259	0.934825	NA
AMOL1_HUMAN	Q8IY63	Angiomotin-like protein 1	AMOTL1	G-6599_DMSO_60min	0.200399	0.0721155	15.932	0.0134535	0.760951	NA
AMOL1_HUMAN	Q8IY63	Angiomotin-like protein 1	AMOTL1	G-6599_DMSO_30min	0.147225	0.0721155	15.932	0.0581211	0.740595	NA
AMOL2_HUMAN	Q9Y2J4-2	Angiomotin-like protein 2 (isoform 2)	AMOTL2	G-6599_DMSO_60min	0.088016	0.0757521	15.932	0.26239	0.957205	NA
AMOL2_HUMAN	Q9Y2J4-2	Angiomotin-like protein 2 (isoform 2)	AMOTL2	G-6599_DMSO_30min	0.0694366	0.0757521	15.932	0.373004	0.893483	NA
AMPB_HUMAN	Q9H4A4	Aminopeptidase B	RNPEP	G-6599_DMSO_30min	0.0289474	0.0744385	15.932	0.702515	0.955538	NA
AMPB_HUMAN	Q9H4A4	Aminopeptidase B	RNPEP	G-6599_DMSO_60min	0.088854	0.0744385	15.932	0.250084	0.957205	NA
AMPD2_HUMAN	Q01433	AMP deaminase 2	AMPD2	G-6599_DMSO_60min	0.0800959	0.0755973	15.932	0.305168	0.973968	NA
AMPD2_HUMAN	Q01433	AMP deaminase 2	AMPD2	G-6599_DMSO_30min	-0.0954056	0.0755973	15.932	0.225104	0.857717	NA
AMPD3_HUMAN	Q01432	AMP deaminase 3	AMPD3	G-6599_DMSO_60min	-0.307571	0.13163	15.932	0.0328511	0.907189	NA
AMPD3_HUMAN	Q01432	AMP deaminase 3	AMPD3	G-6599_DMSO_30min	0.00456522	0.13163	15.932	0.972764	0.99348	NA
AMPH_HUMAN	P49418	Amphiphysin	AMPH	G-6599_DMSO_30min	-0.017161	0.105639	15.932	0.872994	0.979714	NA
AMPH_HUMAN	P49418	Amphiphysin	AMPH	G-6599_DMSO_60min	-0.131805	0.105639	15.932	0.230171	0.957205	NA
AMPL_HUMAN	P28838	Cytosol aminopeptidase	LAP3	G-6599_DMSO_30min	-0.125396	0.100706	15.932	0.231072	0.861357	NA
AMPL_HUMAN	P28838	Cytosol aminopeptidase	LAP3	G-6599_DMSO_60min	0.0240374	0.100706	15.932	0.81439	0.994708	NA
AMRA1_HUMAN	Q9C0C7	Activating molecule in BECN1-regulated autophagy protein 1	AMBRA1	G-6599_DMSO_30min	0.0238341	0.0889697	15.932	0.792221	0.966636	NA
AMRA1_HUMAN	Q9C0C7	Activating molecule in BECN1-regulated autophagy protein 1	AMBRA1	G-6599_DMSO_60min	0.0462093	0.0889697	15.932	0.610634	0.986136	NA
AMZ2_HUMAN	Q86W34	Archaemetzincin-2	AMZ2	G-6599_DMSO_60min	0.119885	0.0633187	15.932	0.0766178	0.907189	NA
AMZ2_HUMAN	Q86W34	Archaemetzincin-2	AMZ2	G-6599_DMSO_30min	-0.0202578	0.0633187	15.932	0.753176	0.958559	NA
AN13A_HUMAN	Q8IZ07	Ankyrin repeat domain-containing protein 13A	ANKRD13A	G-6599_DMSO_30min	-0.020543	0.0636706	15.932	0.751159	0.958559	NA
AN13A_HUMAN	Q8IZ07	Ankyrin repeat domain-containing protein 13A	ANKRD13A	G-6599_DMSO_60min	-0.00971846	0.0636706	15.932	0.880601	0.996427	NA
AN13C_HUMAN	Q8N6S4	Ankyrin repeat domain-containing protein 13C	ANKRD13C	G-6599_DMSO_30min	-0.204048	0.0860392	15.932	0.0306592	0.6746	NA
AN13C_HUMAN	Q8N6S4	Ankyrin repeat domain-containing protein 13C	ANKRD13C	G-6599_DMSO_60min	-0.0943365	0.0860392	15.932	0.289185	0.968688	NA
AN13D_HUMAN	Q6ZTN6	Ankyrin repeat domain-containing protein 13D	ANKRD13D	G-6599_DMSO_60min	0.0225186	0.0716446	15.932	0.757364	0.994708	NA
AN13D_HUMAN	Q6ZTN6	Ankyrin repeat domain-containing protein 13D	ANKRD13D	G-6599_DMSO_30min	-0.0549743	0.0716446	15.932	0.454113	0.910237	NA
AN30A_HUMAN	Q9BXX3	Ankyrin repeat domain-containing protein 30A	ANKRD30A	G-6599_DMSO_60min	-0.00942791	0.0655743	15.932	0.887481	0.996427	NA
AN30A_HUMAN	Q9BXX3	Ankyrin repeat domain-containing protein 30A	ANKRD30A	G-6599_DMSO_30min	0.0225751	0.0655743	15.932	0.735147	0.958559	NA
AN32A_HUMAN	P39687	Acidic leucine-rich nuclear phosphoprotein 32 family member A	ANP32A	G-6599_DMSO_30min	0.179257	0.0781786	15.932	0.0358025	0.702474	NA
AN32A_HUMAN	P39687	Acidic leucine-rich nuclear phosphoprotein 32 family member A	ANP32A	G-6599_DMSO_60min	0.104875	0.0781786	15.932	0.198574	0.957205	NA
AN32B_HUMAN	Q92688	Acidic leucine-rich nuclear phosphoprotein 32 family member B	ANP32B	G-6599_DMSO_30min	-0.285355	0.176587	15.932	0.125732	0.815437	NA
AN32B_HUMAN	Q92688	Acidic leucine-rich nuclear phosphoprotein 32 family member B	ANP32B	G-6599_DMSO_60min	0.102669	0.176587	15.932	0.569101	0.985139	NA
AN32E_HUMAN	Q9BTT0	Acidic leucine-rich nuclear phosphoprotein 32 family member E	ANP32E	G-6599_DMSO_30min	0.0801683	0.0772178	15.932	0.314673	0.87702	NA
AN32E_HUMAN	Q9BTT0	Acidic leucine-rich nuclear phosphoprotein 32 family member E	ANP32E	G-6599_DMSO_60min	0.0643019	0.0772178	15.932	0.417304	0.978926	NA
ANAG_HUMAN	P54802	Alpha-N-acetylglucosaminidase	NAGLU	G-6599_DMSO_60min	-0.00449187	0.0802261	15.932	0.956046	0.997441	NA
ANAG_HUMAN	P54802	Alpha-N-acetylglucosaminidase	NAGLU	G-6599_DMSO_30min	-0.0975971	0.0802261	15.932	0.241501	0.86791	NA
ANC2_HUMAN	Q9UJX6	Anaphase-promoting complex subunit 2	ANAPC2	G-6599_DMSO_60min	0.0804985	0.0617713	15.932	0.211036	0.957205	NA
ANC2_HUMAN	Q9UJX6	Anaphase-promoting complex subunit 2	ANAPC2	G-6599_DMSO_30min	0.0436947	0.0617713	15.932	0.48956	0.920487	NA
ANCHR_HUMAN	Q96K21	Abscission/NoCut checkpoint regulator	ZFYVE19	G-6599_DMSO_60min	-0.0028369	0.103877	15.932	0.978552	0.99975	NA
ANCHR_HUMAN	Q96K21	Abscission/NoCut checkpoint regulator	ZFYVE19	G-6599_DMSO_30min	0.179673	0.103877	15.932	0.10301	0.796311	NA
ANFY1_HUMAN	Q9P2R3	Rabankyrin-5	ANKFY1	G-6599_DMSO_60min	0.0586103	0.0708938	15.932	0.420598	0.979629	NA
ANFY1_HUMAN	Q9P2R3	Rabankyrin-5	ANKFY1	G-6599_DMSO_30min	-0.0697682	0.0708938	15.932	0.339765	0.887798	NA
ANGE1_HUMAN	Q9UNK9	Protein angel homolog 1	ANGEL1	G-6599_DMSO_60min	-0.0160737	0.0692681	15.932	0.819453	0.994708	NA
ANGE1_HUMAN	Q9UNK9	Protein angel homolog 1	ANGEL1	G-6599_DMSO_30min	-0.0877032	0.0692681	15.932	0.223663	0.857717	NA
ANGE2_HUMAN	Q5VTE6	Protein angel homolog 2	ANGEL2	G-6599_DMSO_30min	0.0316334	0.0698391	15.932	0.656694	0.947196	NA
ANGE2_HUMAN	Q5VTE6	Protein angel homolog 2	ANGEL2	G-6599_DMSO_60min	-0.0663757	0.0698391	15.932	0.356101	0.973968	NA
ANGL2_HUMAN	Q9UKU9	Angiopoietin-related protein 2	ANGPTL2	G-6599_DMSO_30min	0.0703898	0.0740948	15.932	0.356304	0.891233	NA
ANGL2_HUMAN	Q9UKU9	Angiopoietin-related protein 2	ANGPTL2	G-6599_DMSO_60min	0.0136257	0.0740948	15.932	0.856415	0.994708	NA
ANK1_HUMAN	P16157	Ankyrin-1	ANK1	G-6599_DMSO_60min	0.0649099	0.0581543	15.932	0.280902	0.964132	NA
ANK1_HUMAN	P16157	Ankyrin-1	ANK1	G-6599_DMSO_30min	-0.0373304	0.0581543	15.932	0.530053	0.927278	NA
ANKH_HUMAN	Q9HCJ1	Progressive ankylosis protein homolog	ANKH	G-6599_DMSO_30min	0.0777959	0.10837	15.932	0.483231	0.918807	NA
ANKH_HUMAN	Q9HCJ1	Progressive ankylosis protein homolog	ANKH	G-6599_DMSO_60min	-0.0359185	0.10837	15.932	0.74463	0.994683	NA
ANKH1_HUMAN	Q8IWZ3	Ankyrin repeat and KH domain-containing protein 1	ANKHD1	G-6599_DMSO_30min	-0.0834297	0.0818389	15.932	0.323227	0.879613	NA
ANKH1_HUMAN	Q8IWZ3	Ankyrin repeat and KH domain-containing protein 1	ANKHD1	G-6599_DMSO_60min	0.0980957	0.0818389	15.932	0.248192	0.957205	NA
ANKH1_HUMAN	Q8IWZ3-2	Ankyrin repeat and KH domain-containing protein 1 (isoform 2)	ANKHD1	G-6599_DMSO_30min	-0.00470885	0.0603798	15.932	0.938809	0.991289	NA
ANKH1_HUMAN	Q8IWZ3-2	Ankyrin repeat and KH domain-containing protein 1 (isoform 2)	ANKHD1	G-6599_DMSO_60min	-0.0134106	0.0603798	15.932	0.827055	0.994708	NA
ANKH1_HUMAN	Q8IWZ3-6	Ankyrin repeat and KH domain-containing protein 1 (isoform 6)	ANKHD1	G-6599_DMSO_60min	0.0221296	0.0898929	15.932	0.808689	0.994708	NA
ANKH1_HUMAN	Q8IWZ3-6	Ankyrin repeat and KH domain-containing protein 1 (isoform 6)	ANKHD1	G-6599_DMSO_30min	-0.0154079	0.0898929	15.932	0.866065	0.978722	NA
ANKL2_HUMAN	Q86XL3	Ankyrin repeat and LEM domain-containing protein 2	ANKLE2	G-6599_DMSO_30min	0.0831272	0.0736366	15.932	0.275659	0.870404	NA
ANKL2_HUMAN	Q86XL3	Ankyrin repeat and LEM domain-containing protein 2	ANKLE2	G-6599_DMSO_60min	-0.00150126	0.0736366	15.932	0.983987	0.99975	NA
ANKR1_HUMAN	Q15327	Ankyrin repeat domain-containing protein 1	ANKRD1	G-6599_DMSO_60min	-0.496551	0.21949	15.932	0.0380148	0.907189	NA
ANKR1_HUMAN	Q15327	Ankyrin repeat domain-containing protein 1	ANKRD1	G-6599_DMSO_30min	0.202655	0.21949	15.932	0.369623	0.893483	NA
ANKR2_HUMAN	Q9GZV1	Ankyrin repeat domain-containing protein 2	ANKRD2	G-6599_DMSO_60min	-0.0156086	0.0735288	15.932	0.834582	0.994708	NA
ANKR2_HUMAN	Q9GZV1	Ankyrin repeat domain-containing protein 2	ANKRD2	G-6599_DMSO_30min	-0.0650246	0.0735288	15.932	0.389663	0.898013	NA
ANKS3_HUMAN	Q6ZW76	Ankyrin repeat and SAM domain-containing protein 3	ANKS3	G-6599_DMSO_30min	-0.0656003	0.0782047	15.932	0.413975	0.906269	NA
ANKS3_HUMAN	Q6ZW76	Ankyrin repeat and SAM domain-containing protein 3	ANKS3	G-6599_DMSO_60min	0.0748488	0.0782047	15.932	0.352822	0.973968	NA
ANKS6_HUMAN	Q68DC2	Ankyrin repeat and SAM domain-containing protein 6	ANKS6	G-6599_DMSO_60min	0.0317032	0.170597	15.932	0.854918	0.994708	NA
ANKS6_HUMAN	Q68DC2	Ankyrin repeat and SAM domain-containing protein 6	ANKS6	G-6599_DMSO_30min	0.0865225	0.170597	15.932	0.618981	0.943193	NA
ANKY2_HUMAN	Q8IV38	Ankyrin repeat and MYND domain-containing protein 2	ANKMY2	G-6599_DMSO_60min	0.0869069	0.0651247	15.932	0.200811	0.957205	NA
ANKY2_HUMAN	Q8IV38	Ankyrin repeat and MYND domain-containing protein 2	ANKMY2	G-6599_DMSO_30min	-0.0101364	0.0651247	15.932	0.878267	0.981595	NA
ANKZ1_HUMAN	Q9H8Y5	Ankyrin repeat and zinc finger domain-containing protein 1	ANKZF1	G-6599_DMSO_60min	-0.00534553	0.059859	15.932	0.929955	0.996995	NA
ANKZ1_HUMAN	Q9H8Y5	Ankyrin repeat and zinc finger domain-containing protein 1	ANKZF1	G-6599_DMSO_30min	0.0555455	0.059859	15.932	0.367285	0.893483	NA
ANLN_HUMAN	Q9NQW6	Actin-binding protein anillin	ANLN	G-6599_DMSO_60min	0.033674	0.0591561	15.932	0.577131	0.986136	NA
ANLN_HUMAN	Q9NQW6	Actin-binding protein anillin	ANLN	G-6599_DMSO_30min	-0.0552252	0.0591561	15.932	0.36447	0.893483	NA
ANM1_HUMAN	Q99873	Protein arginine N-methyltransferase 1	PRMT1	G-6599_DMSO_60min	-0.00290902	0.08845	15.932	0.974172	0.999672	NA
ANM1_HUMAN	Q99873	Protein arginine N-methyltransferase 1	PRMT1	G-6599_DMSO_30min	0.000554326	0.08845	15.932	0.995077	0.999742	NA
ANM2_HUMAN	P55345	Protein arginine N-methyltransferase 2	PRMT2	G-6599_DMSO_60min	0.0519134	0.169365	15.932	0.763181	0.994708	NA
ANM2_HUMAN	P55345	Protein arginine N-methyltransferase 2	PRMT2	G-6599_DMSO_30min	0.0948762	0.169365	15.932	0.583144	0.93774	NA
ANM3_HUMAN	O60678	Protein arginine N-methyltransferase 3	PRMT3	G-6599_DMSO_60min	0.0833566	0.0646528	15.932	0.215699	0.957205	NA
ANM3_HUMAN	O60678	Protein arginine N-methyltransferase 3	PRMT3	G-6599_DMSO_30min	-0.0722075	0.0646528	15.932	0.280619	0.870404	NA
ANM5_HUMAN	O14744	Protein arginine N-methyltransferase 5	PRMT5	G-6599_DMSO_30min	0.00417282	0.0812515	15.932	0.95968	0.992911	NA
ANM5_HUMAN	O14744	Protein arginine N-methyltransferase 5	PRMT5	G-6599_DMSO_60min	0.0382365	0.0812515	15.932	0.644309	0.986136	NA
ANM6_HUMAN	Q96LA8	Protein arginine N-methyltransferase 6	PRMT6	G-6599_DMSO_30min	0.124966	0.078908	15.932	0.132909	0.824439	NA
ANM6_HUMAN	Q96LA8	Protein arginine N-methyltransferase 6	PRMT6	G-6599_DMSO_60min	0.0562003	0.078908	15.932	0.486625	0.983099	NA
ANM7_HUMAN	Q9NVM4	Protein arginine N-methyltransferase 7	PRMT7	G-6599_DMSO_30min	0.00828408	0.0894307	15.932	0.927351	0.988141	NA
ANM7_HUMAN	Q9NVM4	Protein arginine N-methyltransferase 7	PRMT7	G-6599_DMSO_60min	0.232121	0.0894307	15.932	0.0195651	0.89355	NA
ANM9_HUMAN	Q6P2P2	Putative protein arginine N-methyltransferase 9	PRMT9	G-6599_DMSO_60min	0.119293	0.0752574	15.932	0.132582	0.934825	NA
ANM9_HUMAN	Q6P2P2	Putative protein arginine N-methyltransferase 9	PRMT9	G-6599_DMSO_30min	-0.206613	0.0752574	15.932	0.0144104	0.575716	NA
ANO10_HUMAN	Q9NW15	Anoctamin-10	ANO10	G-6599_DMSO_60min	-0.166195	0.103779	15.932	0.12892	0.934825	NA
ANO10_HUMAN	Q9NW15	Anoctamin-10	ANO10	G-6599_DMSO_30min	-0.017761	0.103779	15.932	0.866267	0.978722	NA
ANO6_HUMAN	Q4KMQ2	Anoctamin-6	ANO6	G-6599_DMSO_30min	0.0614029	0.0904275	15.932	0.506865	0.920487	NA
ANO6_HUMAN	Q4KMQ2	Anoctamin-6	ANO6	G-6599_DMSO_60min	-0.0152663	0.0904275	15.932	0.86806	0.996127	NA
ANR10_HUMAN	Q9NXR5	Ankyrin repeat domain-containing protein 10	ANKRD10	G-6599_DMSO_30min	0.0108198	0.0865579	15.932	0.902087	0.98622	NA
ANR10_HUMAN	Q9NXR5	Ankyrin repeat domain-containing protein 10	ANKRD10	G-6599_DMSO_60min	-0.00211813	0.0865579	15.932	0.980781	0.99975	NA
ANR16_HUMAN	Q6P6B7	Ankyrin repeat domain-containing protein 16	ANKRD16	G-6599_DMSO_30min	0.0493058	0.0965829	15.932	0.616699	0.94228	NA
ANR16_HUMAN	Q6P6B7	Ankyrin repeat domain-containing protein 16	ANKRD16	G-6599_DMSO_60min	0.0914722	0.0965829	15.932	0.35774	0.973968	NA
ANR17_HUMAN	O75179	Ankyrin repeat domain-containing protein 17	ANKRD17	G-6599_DMSO_30min	-0.0325012	0.063896	15.932	0.617963	0.942978	NA
ANR17_HUMAN	O75179	Ankyrin repeat domain-containing protein 17	ANKRD17	G-6599_DMSO_60min	0.0199037	0.063896	15.932	0.759459	0.994708	NA
ANR26_HUMAN	Q9UPS8	Ankyrin repeat domain-containing protein 26	ANKRD26	G-6599_DMSO_60min	0.0814472	0.0715361	15.932	0.271724	0.960319	NA
ANR26_HUMAN	Q9UPS8	Ankyrin repeat domain-containing protein 26	ANKRD26	G-6599_DMSO_30min	0.241591	0.0715361	15.932	0.00385991	0.353679	NA
ANR27_HUMAN	Q96NW4	Ankyrin repeat domain-containing protein 27	ANKRD27	G-6599_DMSO_60min	-0.000371791	0.0639788	15.932	0.995436	0.99975	NA
ANR27_HUMAN	Q96NW4	Ankyrin repeat domain-containing protein 27	ANKRD27	G-6599_DMSO_30min	0.0465086	0.0639788	15.932	0.47781	0.917711	NA
ANR28_HUMAN	O15084	Serine/threonine-protein phosphatase 6 regulatory ankyrin repeat subunit A	ANKRD28	G-6599_DMSO_60min	0.189572	0.0860499	15.932	0.0426604	0.907189	NA
ANR28_HUMAN	O15084	Serine/threonine-protein phosphatase 6 regulatory ankyrin repeat subunit A	ANKRD28	G-6599_DMSO_30min	-0.0349752	0.0860499	15.932	0.689818	0.954814	NA
ANR39_HUMAN	Q53RE8	Ankyrin repeat domain-containing protein 39	ANKRD39	G-6599_DMSO_30min	0.0644611	0.200943	15.932	0.752537	0.958559	NA
ANR39_HUMAN	Q53RE8	Ankyrin repeat domain-containing protein 39	ANKRD39	G-6599_DMSO_60min	0.265633	0.200943	15.932	0.204858	0.957205	NA
ANR40_HUMAN	Q6AI12	Ankyrin repeat domain-containing protein 40	ANKRD40	G-6599_DMSO_30min	-0.128575	0.118069	15.932	0.292358	0.870404	NA
ANR40_HUMAN	Q6AI12	Ankyrin repeat domain-containing protein 40	ANKRD40	G-6599_DMSO_60min	0.0682983	0.118069	15.932	0.571039	0.985139	NA
ANR44_HUMAN	Q8N8A2	Serine/threonine-protein phosphatase 6 regulatory ankyrin repeat subunit B	ANKRD44	G-6599_DMSO_60min	0.108388	0.0750646	15.932	0.168136	0.948862	NA
ANR44_HUMAN	Q8N8A2	Serine/threonine-protein phosphatase 6 regulatory ankyrin repeat subunit B	ANKRD44	G-6599_DMSO_30min	-0.12158	0.0750646	15.932	0.124925	0.81376	NA
ANR49_HUMAN	Q8WVL7	Ankyrin repeat domain-containing protein 49	ANKRD49	G-6599_DMSO_30min	-0.0422401	0.148473	15.932	0.779694	0.964475	NA
ANR49_HUMAN	Q8WVL7	Ankyrin repeat domain-containing protein 49	ANKRD49	G-6599_DMSO_60min	0.0517836	0.148473	15.932	0.731826	0.992129	NA
ANR50_HUMAN	Q9ULJ7	Ankyrin repeat domain-containing protein 50	ANKRD50	G-6599_DMSO_30min	-0.125222	0.0615814	15.932	0.0590152	0.740595	NA
ANR50_HUMAN	Q9ULJ7	Ankyrin repeat domain-containing protein 50	ANKRD50	G-6599_DMSO_60min	-0.033974	0.0615814	15.932	0.588814	0.986136	NA
ANR52_HUMAN	Q8NB46	Serine/threonine-protein phosphatase 6 regulatory ankyrin repeat subunit C	ANKRD52	G-6599_DMSO_60min	-0.0426448	0.0995345	15.932	0.674065	0.987123	NA
ANR52_HUMAN	Q8NB46	Serine/threonine-protein phosphatase 6 regulatory ankyrin repeat subunit C	ANKRD52	G-6599_DMSO_30min	0.0646533	0.0995345	15.932	0.525233	0.925295	NA
ANR54_HUMAN	Q6NXT1	Ankyrin repeat domain-containing protein 54	ANKRD54	G-6599_DMSO_60min	0.0801171	0.075003	15.932	0.301355	0.973968	NA
ANR54_HUMAN	Q6NXT1	Ankyrin repeat domain-containing protein 54	ANKRD54	G-6599_DMSO_30min	0.0493405	0.075003	15.932	0.520029	0.923397	NA
ANS1A_HUMAN	Q92625	Ankyrin repeat and SAM domain-containing protein 1A	ANKS1A	G-6599_DMSO_30min	-0.105097	0.0606065	15.932	0.102205	0.795379	NA
ANS1A_HUMAN	Q92625	Ankyrin repeat and SAM domain-containing protein 1A	ANKS1A	G-6599_DMSO_60min	0.0896876	0.0606065	15.932	0.158419	0.941362	NA
ANT3_HUMAN	P01008	Antithrombin-III	SERPINC1	G-6599_DMSO_30min	0.394969	0.295285	15.932	0.199813	0.84562	NA
ANT3_HUMAN	P01008	Antithrombin-III	SERPINC1	G-6599_DMSO_60min	-0.561296	0.295285	15.932	0.0755674	0.907189	NA
ANTR1_HUMAN	Q9H6X2	Anthrax toxin receptor 1	ANTXR1	G-6599_DMSO_30min	0.101593	0.196316	15.932	0.611921	0.941493	NA
ANTR1_HUMAN	Q9H6X2	Anthrax toxin receptor 1	ANTXR1	G-6599_DMSO_60min	0.0555454	0.196316	15.932	0.780867	0.994708	NA
ANX11_HUMAN	P50995	Annexin A11	ANXA11	G-6599_DMSO_60min	0.026526	0.0786066	15.932	0.740181	0.993608	NA
ANX11_HUMAN	P50995	Annexin A11	ANXA11	G-6599_DMSO_30min	-0.172459	0.0786066	15.932	0.043419	0.73288	NA
ANXA1_HUMAN	P04083	Annexin A1	ANXA1	G-6599_DMSO_30min	-0.0847408	0.0646638	15.932	0.208611	0.849057	NA
ANXA1_HUMAN	P04083	Annexin A1	ANXA1	G-6599_DMSO_60min	0.0861604	0.0646638	15.932	0.201462	0.957205	NA
ANXA2_HUMAN	P07355	Annexin A2	ANXA2	G-6599_DMSO_30min	0.126158	0.104386	15.932	0.244462	0.86791	NA
ANXA2_HUMAN	P07355	Annexin A2	ANXA2	G-6599_DMSO_60min	-0.0224349	0.104386	15.932	0.832555	0.994708	NA
ANXA4_HUMAN	P09525	Annexin A4	ANXA4	G-6599_DMSO_30min	-0.0203472	0.106855	15.932	0.851386	0.975237	NA
ANXA4_HUMAN	P09525	Annexin A4	ANXA4	G-6599_DMSO_60min	0.045477	0.106855	15.932	0.676097	0.987123	NA
ANXA5_HUMAN	P08758	Annexin A5	ANXA5	G-6599_DMSO_60min	0.0945403	0.156005	15.932	0.553047	0.983237	NA
ANXA5_HUMAN	P08758	Annexin A5	ANXA5	G-6599_DMSO_30min	-0.31736	0.156005	15.932	0.05892	0.740595	NA
ANXA6_HUMAN	P08133	Annexin A6	ANXA6	G-6599_DMSO_60min	0.0488511	0.0845246	15.932	0.571376	0.985139	NA
ANXA6_HUMAN	P08133	Annexin A6	ANXA6	G-6599_DMSO_30min	0.0286954	0.0845246	15.932	0.738673	0.958559	NA
ANXA7_HUMAN	P20073	Annexin A7	ANXA7	G-6599_DMSO_60min	0.0126609	0.0725588	15.932	0.863677	0.996127	NA
ANXA7_HUMAN	P20073	Annexin A7	ANXA7	G-6599_DMSO_30min	-0.00177737	0.0725588	15.932	0.980761	0.996027	NA
AOFA_HUMAN	P21397	Amine oxidase [flavin-containing] A	MAOA	G-6599_DMSO_30min	0.0331543	0.116117	15.932	0.778921	0.964111	NA
AOFA_HUMAN	P21397	Amine oxidase [flavin-containing] A	MAOA	G-6599_DMSO_60min	-0.101951	0.116117	15.932	0.392994	0.973968	NA
AP1AR_HUMAN	Q63HQ0	AP-1 complex-associated regulatory protein	AP1AR	G-6599_DMSO_60min	0.0399524	0.0845624	15.932	0.643005	0.986136	NA
AP1AR_HUMAN	Q63HQ0	AP-1 complex-associated regulatory protein	AP1AR	G-6599_DMSO_30min	0.117267	0.0845624	15.932	0.184616	0.837328	NA
AP1B1_HUMAN	Q10567	AP-1 complex subunit beta-1	AP1B1	G-6599_DMSO_30min	0.0880214	0.0912553	15.932	0.349178	0.890233	NA
AP1B1_HUMAN	Q10567	AP-1 complex subunit beta-1	AP1B1	G-6599_DMSO_60min	0.0894652	0.0912553	15.932	0.341551	0.973968	NA
AP1G1_HUMAN	O43747	AP-1 complex subunit gamma-1	AP1G1	G-6599_DMSO_60min	-0.0534704	0.0886006	15.932	0.554672	0.983469	NA
AP1G1_HUMAN	O43747	AP-1 complex subunit gamma-1	AP1G1	G-6599_DMSO_30min	0.00239797	0.0886006	15.932	0.978744	0.995487	NA
AP1M1_HUMAN	Q9BXS5	AP-1 complex subunit mu-1	AP1M1	G-6599_DMSO_30min	-0.000630506	0.110486	15.932	0.995518	0.999742	NA
AP1M1_HUMAN	Q9BXS5	AP-1 complex subunit mu-1	AP1M1	G-6599_DMSO_60min	-0.0735154	0.110486	15.932	0.515323	0.983099	NA
AP1S1_HUMAN	P61966	AP-1 complex subunit sigma-1A	AP1S1	G-6599_DMSO_30min	0.0545724	0.168115	15.932	0.749697	0.958559	NA
AP1S1_HUMAN	P61966	AP-1 complex subunit sigma-1A	AP1S1	G-6599_DMSO_60min	0.207396	0.168115	15.932	0.235222	0.957205	NA
AP1S2_HUMAN	P56377	AP-1 complex subunit sigma-2	AP1S2	G-6599_DMSO_60min	-0.234888	0.148442	15.932	0.133215	0.934825	NA
AP1S2_HUMAN	P56377	AP-1 complex subunit sigma-2	AP1S2	G-6599_DMSO_30min	-0.108351	0.148442	15.932	0.476037	0.917401	NA
AP1S2_HUMAN	P56377-2	AP-1 complex subunit sigma-2 (isoform 2)	AP1S2	G-6599_DMSO_60min	0.0173378	0.0695554	15.932	0.80634	0.994708	NA
AP1S2_HUMAN	P56377-2	AP-1 complex subunit sigma-2 (isoform 2)	AP1S2	G-6599_DMSO_30min	0.0276971	0.0695554	15.932	0.695767	0.955538	NA
AP2A1_HUMAN	O95782	AP-2 complex subunit alpha-1	AP2A1	G-6599_DMSO_30min	0.121618	0.0791551	15.932	0.144049	0.826108	NA
AP2A1_HUMAN	O95782	AP-2 complex subunit alpha-1	AP2A1	G-6599_DMSO_60min	0.165605	0.0791551	15.932	0.0527957	0.907189	NA
AP2A2_HUMAN	O94973	AP-2 complex subunit alpha-2	AP2A2	G-6599_DMSO_60min	0.0353331	0.0560735	15.932	0.537549	0.983099	NA
AP2A2_HUMAN	O94973	AP-2 complex subunit alpha-2	AP2A2	G-6599_DMSO_30min	0.0332166	0.0560735	15.932	0.561912	0.934832	NA
AP2B1_HUMAN	P63010	AP-2 complex subunit beta	AP2B1	G-6599_DMSO_30min	-0.397954	0.2902	15.932	0.189285	0.842723	NA
AP2B1_HUMAN	P63010	AP-2 complex subunit beta	AP2B1	G-6599_DMSO_60min	0.622754	0.2902	15.932	0.0476308	0.907189	NA
AP2C_HUMAN	Q92754	Transcription factor AP-2 gamma	TFAP2C	G-6599_DMSO_60min	0.171991	0.0828857	15.932	0.0545434	0.907189	NA
AP2C_HUMAN	Q92754	Transcription factor AP-2 gamma	TFAP2C	G-6599_DMSO_30min	-0.087753	0.0828857	15.932	0.305514	0.873435	NA
AP2M1_HUMAN	Q96CW1	AP-2 complex subunit mu	AP2M1	G-6599_DMSO_60min	0.0241942	0.0627071	15.932	0.704727	0.988501	NA
AP2M1_HUMAN	Q96CW1	AP-2 complex subunit mu	AP2M1	G-6599_DMSO_30min	0.058912	0.0627071	15.932	0.361511	0.891406	NA
AP2S1_HUMAN	P53680	AP-2 complex subunit sigma	AP2S1	G-6599_DMSO_60min	-0.0505947	0.054147	15.932	0.364047	0.973968	NA
AP2S1_HUMAN	P53680	AP-2 complex subunit sigma	AP2S1	G-6599_DMSO_30min	-0.0283931	0.054147	15.932	0.60724	0.941094	NA
AP3B1_HUMAN	O00203	AP-3 complex subunit beta-1	AP3B1	G-6599_DMSO_60min	-0.0207744	0.082328	15.932	0.804007	0.994708	NA
AP3B1_HUMAN	O00203	AP-3 complex subunit beta-1	AP3B1	G-6599_DMSO_30min	0.0524673	0.082328	15.932	0.532984	0.92733	NA
AP3D1_HUMAN	O14617	AP-3 complex subunit delta-1	AP3D1	G-6599_DMSO_60min	0.0584624	0.0683713	15.932	0.405187	0.973968	NA
AP3D1_HUMAN	O14617	AP-3 complex subunit delta-1	AP3D1	G-6599_DMSO_30min	-0.0865516	0.0683713	15.932	0.223746	0.857717	NA
AP3M1_HUMAN	Q9Y2T2	AP-3 complex subunit mu-1	AP3M1	G-6599_DMSO_30min	0.0284209	0.0714424	15.932	0.696046	0.955538	NA
AP3M1_HUMAN	Q9Y2T2	AP-3 complex subunit mu-1	AP3M1	G-6599_DMSO_60min	0.117551	0.0714424	15.932	0.119469	0.934825	NA
AP3M2_HUMAN	P53677	AP-3 complex subunit mu-2	AP3M2	G-6599_DMSO_30min	-0.0796536	0.0658435	15.932	0.244023	0.86791	NA
AP3M2_HUMAN	P53677	AP-3 complex subunit mu-2	AP3M2	G-6599_DMSO_60min	0.0147729	0.0658435	15.932	0.825327	0.994708	NA
AP3S1_HUMAN	Q92572	AP-3 complex subunit sigma-1	AP3S1	G-6599_DMSO_60min	0.151781	0.0878279	15.932	0.103287	0.934825	NA
AP3S1_HUMAN	Q92572	AP-3 complex subunit sigma-1	AP3S1	G-6599_DMSO_30min	0.00803177	0.0878279	15.932	0.928276	0.988496	NA
AP3S2_HUMAN	P59780	AP-3 complex subunit sigma-2	AP3S2	G-6599_DMSO_60min	0.181648	0.151851	15.932	0.249109	0.957205	NA
AP3S2_HUMAN	P59780	AP-3 complex subunit sigma-2	AP3S2	G-6599_DMSO_30min	0.191867	0.151851	15.932	0.224581	0.857717	NA
AP4A_HUMAN	P50583	Bis(5'-nucleosyl)-tetraphosphatase [asymmetrical]	NUDT2	G-6599_DMSO_30min	-0.154356	0.0943992	15.932	0.121621	0.813489	NA
AP4A_HUMAN	P50583	Bis(5'-nucleosyl)-tetraphosphatase [asymmetrical]	NUDT2	G-6599_DMSO_60min	0.0054692	0.0943992	15.932	0.954519	0.997441	NA
AP4AT_HUMAN	Q96N21	AP-4 complex accessory subunit tepsin	ENTHD2	G-6599_DMSO_60min	-0.00552161	0.0553248	15.932	0.921745	0.996995	NA
AP4AT_HUMAN	Q96N21	AP-4 complex accessory subunit tepsin	ENTHD2	G-6599_DMSO_30min	-0.0269545	0.0553248	15.932	0.632748	0.944526	NA
AP4B1_HUMAN	Q9Y6B7	AP-4 complex subunit beta-1	AP4B1	G-6599_DMSO_60min	0.00886487	0.0568267	15.932	0.877994	0.996427	NA
AP4B1_HUMAN	Q9Y6B7	AP-4 complex subunit beta-1	AP4B1	G-6599_DMSO_30min	0.00564657	0.0568267	15.932	0.922088	0.986838	NA
AP4E1_HUMAN	Q9UPM8	AP-4 complex subunit epsilon-1	AP4E1	G-6599_DMSO_30min	0.0315381	0.0713055	15.932	0.664221	0.948114	NA
AP4E1_HUMAN	Q9UPM8	AP-4 complex subunit epsilon-1	AP4E1	G-6599_DMSO_60min	-0.0336971	0.0713055	15.932	0.642926	0.986136	NA
AP4M1_HUMAN	O00189	AP-4 complex subunit mu-1	AP4M1	G-6599_DMSO_30min	-0.0970775	0.065449	15.932	0.157518	0.833394	NA
AP4M1_HUMAN	O00189	AP-4 complex subunit mu-1	AP4M1	G-6599_DMSO_60min	-0.0907853	0.065449	15.932	0.184507	0.955802	NA
AP4S1_HUMAN	Q9Y587	AP-4 complex subunit sigma-1	AP4S1	G-6599_DMSO_60min	0.0199911	0.0734988	15.932	0.789121	0.994708	NA
AP4S1_HUMAN	Q9Y587	AP-4 complex subunit sigma-1	AP4S1	G-6599_DMSO_30min	-0.0224249	0.0734988	15.932	0.764235	0.958627	NA
AP5B1_HUMAN	Q2VPB7	AP-5 complex subunit beta-1	AP5B1	G-6599_DMSO_30min	0.0737206	0.101266	15.932	0.477185	0.917401	NA
AP5B1_HUMAN	Q2VPB7	AP-5 complex subunit beta-1	AP5B1	G-6599_DMSO_60min	0.0135532	0.101266	15.932	0.895207	0.996427	NA
AP5M1_HUMAN	Q9H0R1	AP-5 complex subunit mu-1	AP5M1	G-6599_DMSO_60min	0.0229697	0.0909035	15.932	0.803745	0.994708	NA
AP5M1_HUMAN	Q9H0R1	AP-5 complex subunit mu-1	AP5M1	G-6599_DMSO_30min	0.0643391	0.0909035	15.932	0.489312	0.920487	NA
AP5S1_HUMAN	Q9NUS5	AP-5 complex subunit sigma-1	AP5S1	G-6599_DMSO_60min	0.0650504	0.166211	15.932	0.700707	0.988501	NA
AP5S1_HUMAN	Q9NUS5	AP-5 complex subunit sigma-1	AP5S1	G-6599_DMSO_30min	0.12081	0.166211	15.932	0.477864	0.917711	NA
AP5Z1_HUMAN	O43299	AP-5 complex subunit zeta-1	AP5Z1	G-6599_DMSO_30min	-0.0266262	0.061795	15.932	0.672329	0.95144	NA
AP5Z1_HUMAN	O43299	AP-5 complex subunit zeta-1	AP5Z1	G-6599_DMSO_60min	0.0169336	0.061795	15.932	0.787584	0.994708	NA
APAF_HUMAN	O14727	Apoptotic protease-activating factor 1	APAF1	G-6599_DMSO_30min	-0.0826106	0.0924358	15.932	0.38478	0.898013	NA
APAF_HUMAN	O14727	Apoptotic protease-activating factor 1	APAF1	G-6599_DMSO_60min	-0.0461088	0.0924358	15.932	0.624723	0.986136	NA
APBB1_HUMAN	O00213	Amyloid beta A4 precursor protein-binding family B member 1	APBB1	G-6599_DMSO_30min	-0.275936	0.139559	15.932	0.0655877	0.743939	NA
APBB1_HUMAN	O00213	Amyloid beta A4 precursor protein-binding family B member 1	APBB1	G-6599_DMSO_60min	0.0297173	0.139559	15.932	0.834076	0.994708	NA
APBB2_HUMAN	Q92870	Amyloid beta A4 precursor protein-binding family B member 2	APBB2	G-6599_DMSO_60min	-0.143786	0.218724	15.932	0.520319	0.983099	NA
APBB2_HUMAN	Q92870	Amyloid beta A4 precursor protein-binding family B member 2	APBB2	G-6599_DMSO_30min	-0.0273129	0.218724	15.932	0.902185	0.98622	NA
APBP2_HUMAN	Q92624	Amyloid protein-binding protein 2	APPBP2	G-6599_DMSO_60min	0.0201422	0.0617593	15.932	0.748563	0.994708	NA
APBP2_HUMAN	Q92624	Amyloid protein-binding protein 2	APPBP2	G-6599_DMSO_30min	-0.0134437	0.0617593	15.932	0.830442	0.972552	NA
APC_HUMAN	P25054	Adenomatous polyposis coli protein	APC	G-6599_DMSO_30min	0.0664638	0.116089	15.932	0.574958	0.936645	NA
APC_HUMAN	P25054	Adenomatous polyposis coli protein	APC	G-6599_DMSO_60min	-0.0199062	0.116089	15.932	0.866011	0.996127	NA
APC1_HUMAN	Q9H1A4	Anaphase-promoting complex subunit 1	ANAPC1	G-6599_DMSO_30min	-0.0883298	0.0861405	15.932	0.320486	0.877744	NA
APC1_HUMAN	Q9H1A4	Anaphase-promoting complex subunit 1	ANAPC1	G-6599_DMSO_60min	0.0256227	0.0861405	15.932	0.769964	0.994708	NA
APC10_HUMAN	Q9UM13	Anaphase-promoting complex subunit 10	ANAPC10	G-6599_DMSO_60min	0.0957397	0.0781886	15.932	0.238573	0.957205	NA
APC10_HUMAN	Q9UM13	Anaphase-promoting complex subunit 10	ANAPC10	G-6599_DMSO_30min	-0.0245216	0.0781886	15.932	0.757877	0.958559	NA
APC11_HUMAN	Q9NYG5	Anaphase-promoting complex subunit 11	ANAPC11	G-6599_DMSO_30min	0.110042	0.0726539	15.932	0.149458	0.833394	NA
APC11_HUMAN	Q9NYG5	Anaphase-promoting complex subunit 11	ANAPC11	G-6599_DMSO_60min	0.090287	0.0726539	15.932	0.231958	0.957205	NA
APC16_HUMAN	Q96DE5	Anaphase-promoting complex subunit 16	ANAPC16	G-6599_DMSO_30min	0.0715164	0.0635027	15.932	0.276762	0.870404	NA
APC16_HUMAN	Q96DE5	Anaphase-promoting complex subunit 16	ANAPC16	G-6599_DMSO_60min	0.0145818	0.0635027	15.932	0.821305	0.994708	NA
APC4_HUMAN	Q9UJX5	Anaphase-promoting complex subunit 4	ANAPC4	G-6599_DMSO_60min	-0.181594	0.0815183	15.932	0.0406713	0.907189	NA
APC4_HUMAN	Q9UJX5	Anaphase-promoting complex subunit 4	ANAPC4	G-6599_DMSO_30min	0.0339568	0.0815183	15.932	0.682562	0.953757	NA
APC5_HUMAN	Q9UJX4	Anaphase-promoting complex subunit 5	ANAPC5	G-6599_DMSO_60min	0.0120455	0.0621067	15.932	0.848667	0.994708	NA
APC5_HUMAN	Q9UJX4	Anaphase-promoting complex subunit 5	ANAPC5	G-6599_DMSO_30min	-0.0557708	0.0621067	15.932	0.382565	0.898013	NA
APC7_HUMAN	Q9UJX3	Anaphase-promoting complex subunit 7	ANAPC7	G-6599_DMSO_30min	-0.0909692	0.0599608	15.932	0.148821	0.832564	NA
APC7_HUMAN	Q9UJX3	Anaphase-promoting complex subunit 7	ANAPC7	G-6599_DMSO_60min	0.0154981	0.0599608	15.932	0.799354	0.994708	NA
APCL_HUMAN	O95996	NA	NA	G-6599_DMSO_60min	-0.0839946	0.0880533	15.932	0.354381	0.973968	NA
APCL_HUMAN	O95996	NA	NA	G-6599_DMSO_30min	0.161451	0.0880533	15.932	0.0854702	0.777841	NA
APEX1_HUMAN	P27695	DNA-(apurinic or apyrimidinic site) lyase	APEX1	G-6599_DMSO_30min	-0.0119413	0.0645484	15.932	0.855565	0.975747	NA
APEX1_HUMAN	P27695	DNA-(apurinic or apyrimidinic site) lyase	APEX1	G-6599_DMSO_60min	0.0522944	0.0645484	15.932	0.429785	0.980183	NA
APEX2_HUMAN	Q9UBZ4	DNA-(apurinic or apyrimidinic site) lyase 2	APEX2	G-6599_DMSO_30min	0.186101	0.120509	15.932	0.142148	0.826108	NA
APEX2_HUMAN	Q9UBZ4	DNA-(apurinic or apyrimidinic site) lyase 2	APEX2	G-6599_DMSO_60min	0.132705	0.120509	15.932	0.287169	0.966033	NA
API_ACHLYC	X15636	NA	NA	G-6599_DMSO_30min	0.000799165	0.148209	15.932	0.995765	0.999742	NA
API_ACHLYC	X15636	NA	NA	G-6599_DMSO_60min	-0.0332553	0.148209	15.932	0.825313	0.994708	NA
API5_HUMAN	Q9BZZ5	Apoptosis inhibitor 5	API5	G-6599_DMSO_30min	0.0951405	0.0873524	15.932	0.292285	0.870404	NA
API5_HUMAN	Q9BZZ5	Apoptosis inhibitor 5	API5	G-6599_DMSO_60min	-1.45816e-05	0.0873524	15.932	0.999869	0.999978	NA
API5_HUMAN	Q9BZZ5-1	Apoptosis inhibitor 5 (isoform 1)	API5	G-6599_DMSO_60min	-0.172963	0.109462	15.932	0.133726	0.934825	NA
API5_HUMAN	Q9BZZ5-1	Apoptosis inhibitor 5 (isoform 1)	API5	G-6599_DMSO_30min	-0.00707088	0.109462	15.932	0.949299	0.991979	NA
APLF_HUMAN	Q8IW19	Aprataxin and PNK-like factor	APLF	G-6599_DMSO_60min	0.0063759	0.0628915	15.932	0.920514	0.996995	NA
APLF_HUMAN	Q8IW19	Aprataxin and PNK-like factor	APLF	G-6599_DMSO_30min	0.0203012	0.0628915	15.932	0.751046	0.958559	NA
APLP2_HUMAN	Q06481	Amyloid-like protein 2	APLP2	G-6599_DMSO_30min	0.0144782	0.0821147	15.932	0.862267	0.978722	NA
APLP2_HUMAN	Q06481	Amyloid-like protein 2	APLP2	G-6599_DMSO_60min	0.0100267	0.0821147	15.932	0.904342	0.996427	NA
APMAP_HUMAN	Q9HDC9	Adipocyte plasma membrane-associated protein	APMAP	G-6599_DMSO_30min	0.161245	0.135412	15.932	0.251182	0.870404	NA
APMAP_HUMAN	Q9HDC9	Adipocyte plasma membrane-associated protein	APMAP	G-6599_DMSO_60min	-0.103774	0.135412	15.932	0.45467	0.982449	NA
APOA1_HUMAN	P02647	Apolipoprotein A-I	APOA1	G-6599_DMSO_60min	-0.595827	0.29359	15.932	0.0594603	0.907189	NA
APOA1_HUMAN	P02647	Apolipoprotein A-I	APOA1	G-6599_DMSO_30min	0.49431	0.29359	15.932	0.111733	0.806011	NA
APOC3_HUMAN	P02656	Apolipoprotein C-III	APOC3	G-6599_DMSO_60min	-0.0323209	0.245311	15.932	0.896828	0.996427	NA
APOC3_HUMAN	P02656	Apolipoprotein C-III	APOC3	G-6599_DMSO_30min	0.117697	0.245311	15.932	0.637901	0.944526	NA
APOE_HUMAN	P02649	Apolipoprotein E	APOE	G-6599_DMSO_30min	0.432106	0.105968	15.932	0.000883613	0.229562	NA
APOE_HUMAN	P02649	Apolipoprotein E	APOE	G-6599_DMSO_60min	-0.0612838	0.105968	15.932	0.571131	0.985139	NA
APOH_HUMAN	P02749	Beta-2-glycoprotein 1	APOH	G-6599_DMSO_60min	-0.38032	0.363578	15.932	0.311151	0.973968	NA
APOH_HUMAN	P02749	Beta-2-glycoprotein 1	APOH	G-6599_DMSO_30min	0.361968	0.363578	15.932	0.33434	0.885453	NA
APOL2_HUMAN	Q9BQE5	Apolipoprotein L2	APOL2	G-6599_DMSO_60min	0.00647125	0.10856	15.932	0.953208	0.997441	NA
APOL2_HUMAN	Q9BQE5	Apolipoprotein L2	APOL2	G-6599_DMSO_30min	0.0404605	0.10856	15.932	0.714283	0.956976	NA
APT_HUMAN	P07741	Adenine phosphoribosyltransferase	APRT	G-6599_DMSO_30min	-0.0373209	0.079065	15.932	0.643307	0.944526	NA
APT_HUMAN	P07741	Adenine phosphoribosyltransferase	APRT	G-6599_DMSO_60min	0.110375	0.079065	15.932	0.181862	0.953825	NA
APTX_HUMAN	Q7Z2E3	Aprataxin	APTX	G-6599_DMSO_30min	0.00270215	0.0721134	15.932	0.970575	0.99348	NA
APTX_HUMAN	Q7Z2E3	Aprataxin	APTX	G-6599_DMSO_60min	-0.0451604	0.0721134	15.932	0.540026	0.983099	NA
AQR_HUMAN	O60306	Intron-binding protein aquarius	AQR	G-6599_DMSO_30min	0.0254723	0.0843875	15.932	0.766672	0.958662	NA
AQR_HUMAN	O60306	Intron-binding protein aquarius	AQR	G-6599_DMSO_60min	0.0201249	0.0843875	15.932	0.814548	0.994708	NA
AR13B_HUMAN	Q3SXY8	ADP-ribosylation factor-like protein 13B	ARL13B	G-6599_DMSO_60min	0.0545698	0.0837031	15.932	0.523731	0.983099	NA
AR13B_HUMAN	Q3SXY8	ADP-ribosylation factor-like protein 13B	ARL13B	G-6599_DMSO_30min	0.0101145	0.0837031	15.932	0.90533	0.98622	NA
AR2BP_HUMAN	Q9Y2Y0	ADP-ribosylation factor-like protein 2-binding protein	ARL2BP	G-6599_DMSO_60min	-0.0711431	0.126495	15.932	0.581659	0.986136	NA
AR2BP_HUMAN	Q9Y2Y0	ADP-ribosylation factor-like protein 2-binding protein	ARL2BP	G-6599_DMSO_30min	0.0228198	0.126495	15.932	0.859113	0.977659	NA
AR6P1_HUMAN	Q15041	ADP-ribosylation factor-like protein 6-interacting protein 1	ARL6IP1	G-6599_DMSO_60min	0.180211	0.0915885	15.932	0.0667719	0.907189	NA
AR6P1_HUMAN	Q15041	ADP-ribosylation factor-like protein 6-interacting protein 1	ARL6IP1	G-6599_DMSO_30min	0.0387457	0.0915885	15.932	0.67792	0.952404	NA
AR6P4_HUMAN	Q66PJ3	ADP-ribosylation factor-like protein 6-interacting protein 4	ARL6IP4	G-6599_DMSO_30min	-0.0840426	0.0614024	15.932	0.190078	0.842726	NA
AR6P4_HUMAN	Q66PJ3	ADP-ribosylation factor-like protein 6-interacting protein 4	ARL6IP4	G-6599_DMSO_60min	-0.0804468	0.0614024	15.932	0.208719	0.957205	NA
AR6P6_HUMAN	Q8N6S5	ADP-ribosylation factor-like protein 6-interacting protein 6	ARL6IP6	G-6599_DMSO_60min	-0.0580349	0.143486	15.932	0.69125	0.987921	NA
AR6P6_HUMAN	Q8N6S5	ADP-ribosylation factor-like protein 6-interacting protein 6	ARL6IP6	G-6599_DMSO_30min	0.135004	0.143486	15.932	0.360813	0.891406	NA
ARAF_HUMAN	P10398	Serine/threonine-protein kinase A-Raf	ARAF	G-6599_DMSO_30min	-0.0125397	0.0617366	15.932	0.841616	0.973733	NA
ARAF_HUMAN	P10398	Serine/threonine-protein kinase A-Raf	ARAF	G-6599_DMSO_60min	0.0574062	0.0617366	15.932	0.366321	0.973968	NA
ARAID_HUMAN	Q6UW56	All-trans retinoic acid-induced differentiation factor	ATRAID	G-6599_DMSO_60min	-0.0696428	0.100251	15.932	0.49726	0.983099	NA
ARAID_HUMAN	Q6UW56	All-trans retinoic acid-induced differentiation factor	ATRAID	G-6599_DMSO_30min	0.025392	0.100251	15.932	0.803288	0.968565	NA
ARAP1_HUMAN	Q96P48	Arf-GAP with Rho-GAP domain, ANK repeat and PH domain-containing protein 1	ARAP1	G-6599_DMSO_30min	0.0301318	0.066961	15.932	0.65878	0.94789	NA
ARAP1_HUMAN	Q96P48	Arf-GAP with Rho-GAP domain, ANK repeat and PH domain-containing protein 1	ARAP1	G-6599_DMSO_60min	0.0921217	0.066961	15.932	0.187933	0.957205	NA
ARAP3_HUMAN	Q8WWN8	Arf-GAP with Rho-GAP domain, ANK repeat and PH domain-containing protein 3	ARAP3	G-6599_DMSO_30min	0.0774738	0.0847782	15.932	0.374424	0.893483	NA
ARAP3_HUMAN	Q8WWN8	Arf-GAP with Rho-GAP domain, ANK repeat and PH domain-containing protein 3	ARAP3	G-6599_DMSO_60min	0.00955863	0.0847782	15.932	0.911638	0.996995	NA
ARBK1_HUMAN	P25098	Beta-adrenergic receptor kinase 1	ADRBK1	G-6599_DMSO_60min	-0.0974841	0.106772	15.932	0.374848	0.973968	NA
ARBK1_HUMAN	P25098	Beta-adrenergic receptor kinase 1	ADRBK1	G-6599_DMSO_30min	0.0903063	0.106772	15.932	0.410198	0.903894	NA
ARBK2_HUMAN	P35626	Beta-adrenergic receptor kinase 2	ADRBK2	G-6599_DMSO_30min	-0.0705813	0.0990498	15.932	0.486409	0.919405	NA
ARBK2_HUMAN	P35626	Beta-adrenergic receptor kinase 2	ADRBK2	G-6599_DMSO_60min	0.00788668	0.0990498	15.932	0.937528	0.996995	NA
ARC1A_HUMAN	Q92747	Actin-related protein 2/3 complex subunit 1A	ARPC1A	G-6599_DMSO_60min	0.039203	0.0906897	15.932	0.671334	0.987123	NA
ARC1A_HUMAN	Q92747	Actin-related protein 2/3 complex subunit 1A	ARPC1A	G-6599_DMSO_30min	-0.0213731	0.0906897	15.932	0.816689	0.969507	NA
ARC1B_HUMAN	O15143	Actin-related protein 2/3 complex subunit 1B	ARPC1B	G-6599_DMSO_30min	0.0136719	0.216621	15.932	0.950461	0.991979	NA
ARC1B_HUMAN	O15143	Actin-related protein 2/3 complex subunit 1B	ARPC1B	G-6599_DMSO_60min	0.0634485	0.216621	15.932	0.773379	0.994708	NA
ARCH_HUMAN	Q8IWT0	Protein archease	ZBTB8OS	G-6599_DMSO_60min	0.0638338	0.0892775	15.932	0.484953	0.982773	NA
ARCH_HUMAN	Q8IWT0	Protein archease	ZBTB8OS	G-6599_DMSO_30min	0.0362965	0.0892775	15.932	0.689742	0.954814	NA
AREL1_HUMAN	O15033	Apoptosis-resistant E3 ubiquitin protein ligase 1	AREL1	G-6599_DMSO_60min	-0.0117107	0.081476	15.932	0.887515	0.996427	NA
AREL1_HUMAN	O15033	Apoptosis-resistant E3 ubiquitin protein ligase 1	AREL1	G-6599_DMSO_30min	0.0683729	0.081476	15.932	0.413784	0.906269	NA
ARF1_HUMAN	P84077	ADP-ribosylation factor 1	ARF1	G-6599_DMSO_30min	-0.200818	0.080652	15.932	0.024212	0.643982	NA
ARF1_HUMAN	P84077	ADP-ribosylation factor 1	ARF1	G-6599_DMSO_60min	0.00953796	0.080652	15.932	0.907339	0.996648	NA
ARF4_HUMAN	P18085	ADP-ribosylation factor 4	ARF4	G-6599_DMSO_30min	-0.0232303	0.135193	15.932	0.865734	0.978722	NA
ARF4_HUMAN	P18085	ADP-ribosylation factor 4	ARF4	G-6599_DMSO_60min	-0.132603	0.135193	15.932	0.34133	0.973968	NA
ARF5_HUMAN	P84085	ADP-ribosylation factor 5	ARF5	G-6599_DMSO_60min	0.0564719	0.0898772	15.932	0.538696	0.983099	NA
ARF5_HUMAN	P84085	ADP-ribosylation factor 5	ARF5	G-6599_DMSO_30min	-0.0436168	0.0898772	15.932	0.634074	0.944526	NA
ARF6_HUMAN	P62330	ADP-ribosylation factor 6	ARF6	G-6599_DMSO_60min	-0.0807247	0.0767897	15.932	0.308831	0.973968	NA
ARF6_HUMAN	P62330	ADP-ribosylation factor 6	ARF6	G-6599_DMSO_30min	0.0521958	0.0767897	15.932	0.506436	0.920487	NA
ARFG1_HUMAN	Q8N6T3	ADP-ribosylation factor GTPase-activating protein 1	ARFGAP1	G-6599_DMSO_30min	0.0665095	0.0541433	15.932	0.237135	0.865111	NA
ARFG1_HUMAN	Q8N6T3	ADP-ribosylation factor GTPase-activating protein 1	ARFGAP1	G-6599_DMSO_60min	-0.000781678	0.0541433	15.932	0.98866	0.99975	NA
ARFG2_HUMAN	Q8N6H7	ADP-ribosylation factor GTPase-activating protein 2	ARFGAP2	G-6599_DMSO_60min	0.0438972	0.0801224	15.932	0.59137	0.986136	NA
ARFG2_HUMAN	Q8N6H7	ADP-ribosylation factor GTPase-activating protein 2	ARFGAP2	G-6599_DMSO_30min	-0.0890396	0.0801224	15.932	0.282931	0.870404	NA
ARFG3_HUMAN	Q9NP61	ADP-ribosylation factor GTPase-activating protein 3	ARFGAP3	G-6599_DMSO_60min	0.0415452	0.0830818	15.932	0.623875	0.986136	NA
ARFG3_HUMAN	Q9NP61	ADP-ribosylation factor GTPase-activating protein 3	ARFGAP3	G-6599_DMSO_30min	-0.20431	0.0830818	15.932	0.025753	0.643982	NA
ARFP1_HUMAN	P53367	Arfaptin-1	ARFIP1	G-6599_DMSO_30min	-0.129772	0.0719197	15.932	0.0901056	0.782504	NA
ARFP1_HUMAN	P53367	Arfaptin-1	ARFIP1	G-6599_DMSO_60min	0.0717473	0.0719197	15.932	0.333383	0.973968	NA
ARFP1_HUMAN	P53367-2	Arfaptin-1 (isoform 2)	ARFIP1	G-6599_DMSO_30min	0.0284391	0.0753485	15.932	0.710832	0.956325	NA
ARFP1_HUMAN	P53367-2	Arfaptin-1 (isoform 2)	ARFIP1	G-6599_DMSO_60min	0.0127796	0.0753485	15.932	0.867454	0.996127	NA
ARFP2_HUMAN	P53365	Arfaptin-2	ARFIP2	G-6599_DMSO_60min	0.0196207	0.0509123	15.932	0.705052	0.988501	NA
ARFP2_HUMAN	P53365	Arfaptin-2	ARFIP2	G-6599_DMSO_30min	0.0245472	0.0509123	15.932	0.636259	0.944526	NA
ARFRP_HUMAN	Q13795	ADP-ribosylation factor-related protein 1	ARFRP1	G-6599_DMSO_60min	0.0272586	0.0620705	15.932	0.666447	0.986136	NA
ARFRP_HUMAN	Q13795	ADP-ribosylation factor-related protein 1	ARFRP1	G-6599_DMSO_30min	0.269716	0.0620705	15.932	0.000505724	0.196549	NA
ARG28_HUMAN	Q8N1W1	Rho guanine nucleotide exchange factor 28	ARHGEF28	G-6599_DMSO_30min	-0.137072	0.0967455	15.932	0.175789	0.834008	NA
ARG28_HUMAN	Q8N1W1	Rho guanine nucleotide exchange factor 28	ARHGEF28	G-6599_DMSO_60min	0.109216	0.0967455	15.932	0.275652	0.961247	NA
ARGAL_HUMAN	Q9HCE6	Rho guanine nucleotide exchange factor 10-like protein	ARHGEF10L	G-6599_DMSO_60min	0.0221152	0.0516149	15.932	0.67405	0.987123	NA
ARGAL_HUMAN	Q9HCE6	Rho guanine nucleotide exchange factor 10-like protein	ARHGEF10L	G-6599_DMSO_30min	-0.0464742	0.0516149	15.932	0.381315	0.897334	NA
ARGL1_HUMAN	Q9NWB6	Arginine and glutamate-rich protein 1	ARGLU1	G-6599_DMSO_60min	-0.0299576	0.115691	15.932	0.798994	0.994708	NA
ARGL1_HUMAN	Q9NWB6	Arginine and glutamate-rich protein 1	ARGLU1	G-6599_DMSO_30min	0.164964	0.115691	15.932	0.173196	0.834008	NA
ARH_HUMAN	Q5SW96	Low density lipoprotein receptor adapter protein 1	LDLRAP1	G-6599_DMSO_60min	0.0936198	0.271165	15.932	0.734422	0.992947	NA
ARH_HUMAN	Q5SW96	Low density lipoprotein receptor adapter protein 1	LDLRAP1	G-6599_DMSO_30min	-0.74221	0.271165	15.932	0.0146581	0.575716	NA
ARH40_HUMAN	Q8TER5	Rho guanine nucleotide exchange factor 40	ARHGEF40	G-6599_DMSO_30min	-0.0902859	0.0605799	15.932	0.155661	0.833394	NA
ARH40_HUMAN	Q8TER5	Rho guanine nucleotide exchange factor 40	ARHGEF40	G-6599_DMSO_60min	0.117392	0.0605799	15.932	0.0705788	0.907189	NA
ARHG1_HUMAN	Q92888	Rho guanine nucleotide exchange factor 1	ARHGEF1	G-6599_DMSO_30min	-0.214678	0.129321	15.932	0.116456	0.809167	NA
ARHG1_HUMAN	Q92888	Rho guanine nucleotide exchange factor 1	ARHGEF1	G-6599_DMSO_60min	0.0264662	0.129321	15.932	0.840433	0.994708	NA
ARHG2_HUMAN	Q92974	Rho guanine nucleotide exchange factor 2	ARHGEF2	G-6599_DMSO_30min	0.043349	0.102036	15.932	0.676634	0.952404	NA
ARHG2_HUMAN	Q92974	Rho guanine nucleotide exchange factor 2	ARHGEF2	G-6599_DMSO_60min	0.0505243	0.102036	15.932	0.627245	0.986136	NA
ARHG3_HUMAN	Q9NR81	Rho guanine nucleotide exchange factor 3	ARHGEF3	G-6599_DMSO_30min	-0.193439	0.142755	15.932	0.194307	0.842726	NA
ARHG3_HUMAN	Q9NR81	Rho guanine nucleotide exchange factor 3	ARHGEF3	G-6599_DMSO_60min	0.0694286	0.142755	15.932	0.633344	0.986136	NA
ARHG3_HUMAN	Q9NR81-2	Rho guanine nucleotide exchange factor 3 (isoform 2)	ARHGEF3	G-6599_DMSO_60min	-0.00835437	0.100647	15.932	0.93488	0.996995	NA
ARHG3_HUMAN	Q9NR81-2	Rho guanine nucleotide exchange factor 3 (isoform 2)	ARHGEF3	G-6599_DMSO_30min	0.0311572	0.100647	15.932	0.7609	0.958559	NA
ARHG6_HUMAN	Q15052	Rho guanine nucleotide exchange factor 6	ARHGEF6	G-6599_DMSO_60min	-0.0466248	0.18784	15.932	0.807138	0.994708	NA
ARHG6_HUMAN	Q15052	Rho guanine nucleotide exchange factor 6	ARHGEF6	G-6599_DMSO_30min	0.113184	0.18784	15.932	0.555286	0.932566	NA
ARHG7_HUMAN	Q14155	Rho guanine nucleotide exchange factor 7	ARHGEF7	G-6599_DMSO_30min	0.00641429	0.0993892	15.932	0.949345	0.991979	NA
ARHG7_HUMAN	Q14155	Rho guanine nucleotide exchange factor 7	ARHGEF7	G-6599_DMSO_60min	0.111091	0.0993892	15.932	0.280253	0.963906	NA
ARHG8_HUMAN	Q7Z628	Neuroepithelial cell-transforming gene 1 protein	NET1	G-6599_DMSO_60min	-0.0296113	0.0682116	15.932	0.67003	0.987123	NA
ARHG8_HUMAN	Q7Z628	Neuroepithelial cell-transforming gene 1 protein	NET1	G-6599_DMSO_30min	0.0704803	0.0682116	15.932	0.316912	0.87744	NA
ARHGA_HUMAN	O15013	Rho guanine nucleotide exchange factor 10	ARHGEF10	G-6599_DMSO_30min	-0.0155302	0.0802745	15.932	0.849041	0.975022	NA
ARHGA_HUMAN	O15013	Rho guanine nucleotide exchange factor 10	ARHGEF10	G-6599_DMSO_60min	0.0604727	0.0802745	15.932	0.462244	0.982449	NA
ARHGB_HUMAN	O15085	Rho guanine nucleotide exchange factor 11	ARHGEF11	G-6599_DMSO_30min	0.00669981	0.0679542	15.932	0.922691	0.986838	NA
ARHGB_HUMAN	O15085	Rho guanine nucleotide exchange factor 11	ARHGEF11	G-6599_DMSO_60min	0.113397	0.0679542	15.932	0.1147	0.934825	NA
ARHGB_HUMAN	O15085-2	Rho guanine nucleotide exchange factor 11 (isoform 2)	ARHGEF11	G-6599_DMSO_60min	-0.0518482	0.0929924	15.932	0.584899	0.986136	NA
ARHGB_HUMAN	O15085-2	Rho guanine nucleotide exchange factor 11 (isoform 2)	ARHGEF11	G-6599_DMSO_30min	0.130774	0.0929924	15.932	0.178844	0.835514	NA
ARHGC_HUMAN	Q9NZN5	Rho guanine nucleotide exchange factor 12	ARHGEF12	G-6599_DMSO_30min	-0.0635473	0.0575994	15.932	0.286299	0.870404	NA
ARHGC_HUMAN	Q9NZN5	Rho guanine nucleotide exchange factor 12	ARHGEF12	G-6599_DMSO_60min	-0.0393975	0.0575994	15.932	0.503809	0.983099	NA
ARHGG_HUMAN	Q5VV41	Rho guanine nucleotide exchange factor 16	ARHGEF16	G-6599_DMSO_60min	-0.0446618	0.066182	15.932	0.509457	0.983099	NA
ARHGG_HUMAN	Q5VV41	Rho guanine nucleotide exchange factor 16	ARHGEF16	G-6599_DMSO_30min	-0.047025	0.066182	15.932	0.487641	0.919934	NA
ARHGH_HUMAN	Q96PE2	Rho guanine nucleotide exchange factor 17	ARHGEF17	G-6599_DMSO_60min	0.0199436	0.0738421	15.932	0.790562	0.994708	NA
ARHGH_HUMAN	Q96PE2	Rho guanine nucleotide exchange factor 17	ARHGEF17	G-6599_DMSO_30min	-0.0269218	0.0738421	15.932	0.720215	0.957551	NA
ARHGI_HUMAN	Q6ZSZ5	Rho guanine nucleotide exchange factor 18	ARHGEF18	G-6599_DMSO_60min	0.0319303	0.0789959	15.932	0.691439	0.987921	NA
ARHGI_HUMAN	Q6ZSZ5	Rho guanine nucleotide exchange factor 18	ARHGEF18	G-6599_DMSO_30min	0.145095	0.0789959	15.932	0.0849769	0.777841	NA
ARHGQ_HUMAN	Q96DR7	Rho guanine nucleotide exchange factor 26	ARHGEF26	G-6599_DMSO_60min	-0.024034	0.0748682	15.932	0.75237	0.994708	NA
ARHGQ_HUMAN	Q96DR7	Rho guanine nucleotide exchange factor 26	ARHGEF26	G-6599_DMSO_30min	0.100148	0.0748682	15.932	0.19979	0.84562	NA
ARI1_HUMAN	Q9Y4X5	E3 ubiquitin-protein ligase ARIH1	ARIH1	G-6599_DMSO_60min	0.0498351	0.0696248	15.932	0.484495	0.982773	NA
ARI1_HUMAN	Q9Y4X5	E3 ubiquitin-protein ligase ARIH1	ARIH1	G-6599_DMSO_30min	0.0760392	0.0696248	15.932	0.291017	0.870404	NA
ARI1A_HUMAN	O14497	AT-rich interactive domain-containing protein 1A	ARID1A	G-6599_DMSO_60min	0.0348934	0.066525	15.932	0.607142	0.986136	NA
ARI1A_HUMAN	O14497	AT-rich interactive domain-containing protein 1A	ARID1A	G-6599_DMSO_30min	0.0827189	0.066525	15.932	0.231698	0.861357	NA
ARI1B_HUMAN	Q8NFD5	AT-rich interactive domain-containing protein 1B	ARID1B	G-6599_DMSO_30min	-0.0262853	0.0808297	15.932	0.749266	0.958559	NA
ARI1B_HUMAN	Q8NFD5	AT-rich interactive domain-containing protein 1B	ARID1B	G-6599_DMSO_60min	0.122189	0.0808297	15.932	0.150193	0.935452	NA
ARI2_HUMAN	O95376	E3 ubiquitin-protein ligase ARIH2	ARIH2	G-6599_DMSO_60min	-0.0363646	0.0857091	15.932	0.677036	0.987123	NA
ARI2_HUMAN	O95376	E3 ubiquitin-protein ligase ARIH2	ARIH2	G-6599_DMSO_30min	-0.0185488	0.0857091	15.932	0.83141	0.972552	NA
ARI3A_HUMAN	Q99856	AT-rich interactive domain-containing protein 3A	ARID3A	G-6599_DMSO_30min	0.00410607	0.116393	15.932	0.972297	0.99348	NA
ARI3A_HUMAN	Q99856	AT-rich interactive domain-containing protein 3A	ARID3A	G-6599_DMSO_60min	-0.0382348	0.116393	15.932	0.746814	0.994708	NA
ARI4A_HUMAN	P29374	AT-rich interactive domain-containing protein 4A	ARID4A	G-6599_DMSO_30min	-0.0594797	0.102983	15.932	0.57163	0.936645	NA
ARI4A_HUMAN	P29374	AT-rich interactive domain-containing protein 4A	ARID4A	G-6599_DMSO_60min	-0.0382096	0.102983	15.932	0.715505	0.989582	NA
ARI4B_HUMAN	Q4LE39	AT-rich interactive domain-containing protein 4B	ARID4B	G-6599_DMSO_60min	-0.0268575	0.204174	15.932	0.896993	0.996427	NA
ARI4B_HUMAN	Q4LE39	AT-rich interactive domain-containing protein 4B	ARID4B	G-6599_DMSO_30min	-0.192778	0.204174	15.932	0.359176	0.891285	NA
ARI5B_HUMAN	Q14865	AT-rich interactive domain-containing protein 5B	ARID5B	G-6599_DMSO_60min	0.00638237	0.105375	15.932	0.952457	0.997441	NA
ARI5B_HUMAN	Q14865	AT-rich interactive domain-containing protein 5B	ARID5B	G-6599_DMSO_30min	-0.299544	0.105375	15.932	0.0117963	0.555867	NA
ARID2_HUMAN	Q68CP9	AT-rich interactive domain-containing protein 2	ARID2	G-6599_DMSO_60min	0.0696621	0.0893375	15.932	0.44696	0.981672	NA
ARID2_HUMAN	Q68CP9	AT-rich interactive domain-containing protein 2	ARID2	G-6599_DMSO_30min	0.00870767	0.0893375	15.932	0.923569	0.986909	NA
ARIP4_HUMAN	Q9Y4B4	Helicase ARIP4	RAD54L2	G-6599_DMSO_60min	0.048261	0.0699763	15.932	0.500321	0.983099	NA
ARIP4_HUMAN	Q9Y4B4	Helicase ARIP4	RAD54L2	G-6599_DMSO_30min	-0.0640731	0.0699763	15.932	0.373508	0.893483	NA
ARK72_HUMAN	O43488	Aflatoxin B1 aldehyde reductase member 2	AKR7A2	G-6599_DMSO_60min	-0.029225	0.0665958	15.932	0.66667	0.986136	NA
ARK72_HUMAN	O43488	Aflatoxin B1 aldehyde reductase member 2	AKR7A2	G-6599_DMSO_30min	0.0376752	0.0665958	15.932	0.579459	0.937019	NA
ARL1_HUMAN	P40616	ADP-ribosylation factor-like protein 1	ARL1	G-6599_DMSO_30min	-0.0546792	0.0603742	15.932	0.378603	0.89573	NA
ARL1_HUMAN	P40616	ADP-ribosylation factor-like protein 1	ARL1	G-6599_DMSO_60min	-0.0409177	0.0603742	15.932	0.507664	0.983099	NA
ARL15_HUMAN	Q9NXU5	ADP-ribosylation factor-like protein 15	ARL15	G-6599_DMSO_60min	0.206261	0.119923	15.932	0.104804	0.934825	NA
ARL15_HUMAN	Q9NXU5	ADP-ribosylation factor-like protein 15	ARL15	G-6599_DMSO_30min	0.0878672	0.119923	15.932	0.474386	0.917401	NA
ARL16_HUMAN	Q0P5N6	ADP-ribosylation factor-like protein 16	ARL16	G-6599_DMSO_60min	0.178044	0.107207	15.932	0.116313	0.934825	NA
ARL16_HUMAN	Q0P5N6	ADP-ribosylation factor-like protein 16	ARL16	G-6599_DMSO_30min	0.00409971	0.107207	15.932	0.969971	0.99348	NA
ARL2_HUMAN	P36404	ADP-ribosylation factor-like protein 2	ARL2	G-6599_DMSO_30min	-0.118576	0.0833655	15.932	0.174205	0.834008	NA
ARL2_HUMAN	P36404	ADP-ribosylation factor-like protein 2	ARL2	G-6599_DMSO_60min	-0.0517631	0.0833655	15.932	0.543435	0.983099	NA
ARL3_HUMAN	P36405	ADP-ribosylation factor-like protein 3	ARL3	G-6599_DMSO_30min	-0.197264	0.201809	15.932	0.342942	0.888507	NA
ARL3_HUMAN	P36405	ADP-ribosylation factor-like protein 3	ARL3	G-6599_DMSO_60min	0.118142	0.201809	15.932	0.566468	0.985139	NA
ARL4C_HUMAN	P56559	ADP-ribosylation factor-like protein 4C	ARL4C	G-6599_DMSO_60min	-0.0797072	0.110219	15.932	0.480058	0.982773	NA
ARL4C_HUMAN	P56559	ADP-ribosylation factor-like protein 4C	ARL4C	G-6599_DMSO_30min	0.0358675	0.110219	15.932	0.749098	0.958559	NA
ARL4D_HUMAN	P49703	ADP-ribosylation factor-like protein 4D	ARL4D	G-6599_DMSO_60min	-0.202397	0.10187	15.932	0.0644186	0.907189	NA
ARL4D_HUMAN	P49703	ADP-ribosylation factor-like protein 4D	ARL4D	G-6599_DMSO_30min	0.179153	0.10187	15.932	0.0978269	0.790877	NA
ARL5B_HUMAN	Q96KC2	ADP-ribosylation factor-like protein 5B	ARL5B	G-6599_DMSO_30min	-0.0649761	0.0735971	15.932	0.390438	0.898013	NA
ARL5B_HUMAN	Q96KC2	ADP-ribosylation factor-like protein 5B	ARL5B	G-6599_DMSO_60min	0.00890792	0.0735971	15.932	0.905176	0.996427	NA
ARL6_HUMAN	Q9H0F7	ADP-ribosylation factor-like protein 6	ARL6	G-6599_DMSO_30min	-0.11179	0.0779235	15.932	0.170738	0.833529	NA
ARL6_HUMAN	Q9H0F7	ADP-ribosylation factor-like protein 6	ARL6	G-6599_DMSO_60min	-0.0193379	0.0779235	15.932	0.807177	0.994708	NA
ARL8A_HUMAN	Q96BM9	ADP-ribosylation factor-like protein 8A	ARL8A	G-6599_DMSO_60min	-0.106868	0.0632521	15.932	0.110583	0.934825	NA
ARL8A_HUMAN	Q96BM9	ADP-ribosylation factor-like protein 8A	ARL8A	G-6599_DMSO_30min	0.0583048	0.0632521	15.932	0.37039	0.893483	NA
ARL8B_HUMAN	Q9NVJ2	ADP-ribosylation factor-like protein 8B	ARL8B	G-6599_DMSO_30min	0.087858	0.076613	15.932	0.268406	0.870404	NA
ARL8B_HUMAN	Q9NVJ2	ADP-ribosylation factor-like protein 8B	ARL8B	G-6599_DMSO_60min	-0.0510273	0.076613	15.932	0.514914	0.983099	NA
ARLY_HUMAN	P04424	Argininosuccinate lyase	ASL	G-6599_DMSO_60min	0.00316887	0.0655554	15.932	0.962047	0.997895	NA
ARLY_HUMAN	P04424	Argininosuccinate lyase	ASL	G-6599_DMSO_30min	-0.0337072	0.0655554	15.932	0.614186	0.941633	NA
ARM10_HUMAN	Q8N2F6	Armadillo repeat-containing protein 10	ARMC10	G-6599_DMSO_30min	-0.0675092	0.13695	15.932	0.628774	0.944526	NA
ARM10_HUMAN	Q8N2F6	Armadillo repeat-containing protein 10	ARMC10	G-6599_DMSO_60min	-0.186001	0.13695	15.932	0.193332	0.957205	NA
ARM10_HUMAN	Q8N2F6-2	Armadillo repeat-containing protein 10 (isoform 2)	ARMC10	G-6599_DMSO_30min	-0.18117	0.14692	15.932	0.235416	0.862512	NA
ARM10_HUMAN	Q8N2F6-2	Armadillo repeat-containing protein 10 (isoform 2)	ARMC10	G-6599_DMSO_60min	-0.355328	0.14692	15.932	0.0279293	0.89355	NA
ARMC1_HUMAN	Q9NVT9	Armadillo repeat-containing protein 1	ARMC1	G-6599_DMSO_30min	-0.111488	0.11721	15.932	0.355719	0.891233	NA
ARMC1_HUMAN	Q9NVT9	Armadillo repeat-containing protein 1	ARMC1	G-6599_DMSO_60min	0.203129	0.11721	15.932	0.102398	0.934825	NA
ARMC5_HUMAN	Q96C12	Armadillo repeat-containing protein 5	ARMC5	G-6599_DMSO_30min	-0.0194776	0.0975487	15.932	0.844264	0.973967	NA
ARMC5_HUMAN	Q96C12	Armadillo repeat-containing protein 5	ARMC5	G-6599_DMSO_60min	0.128169	0.0975487	15.932	0.207487	0.957205	NA
ARMC6_HUMAN	Q6NXE6	Armadillo repeat-containing protein 6	ARMC6	G-6599_DMSO_60min	0.0180355	0.0640872	15.932	0.782009	0.994708	NA
ARMC6_HUMAN	Q6NXE6	Armadillo repeat-containing protein 6	ARMC6	G-6599_DMSO_30min	-0.0900986	0.0640872	15.932	0.178964	0.835514	NA
ARMC8_HUMAN	Q8IUR7	Armadillo repeat-containing protein 8	ARMC8	G-6599_DMSO_30min	-0.181793	0.144194	15.932	0.225547	0.857916	NA
ARMC8_HUMAN	Q8IUR7	Armadillo repeat-containing protein 8	ARMC8	G-6599_DMSO_60min	-0.0734845	0.144194	15.932	0.617302	0.986136	NA
ARMC9_HUMAN	Q7Z3E5	LisH domain-containing protein ARMC9	ARMC9	G-6599_DMSO_60min	0.0963772	0.0709526	15.932	0.193283	0.957205	NA
ARMC9_HUMAN	Q7Z3E5	LisH domain-containing protein ARMC9	ARMC9	G-6599_DMSO_30min	-0.0661809	0.0709526	15.932	0.364871	0.893483	NA
ARMD3_HUMAN	Q5T2E6	NA	NA	G-6599_DMSO_60min	-0.00333749	0.071249	15.932	0.963221	0.998108	NA
ARMD3_HUMAN	Q5T2E6	NA	NA	G-6599_DMSO_30min	-0.00167489	0.071249	15.932	0.981537	0.996384	NA
ARMX2_HUMAN	Q7L311	Armadillo repeat-containing X-linked protein 2	ARMCX2	G-6599_DMSO_30min	0.141348	0.115233	15.932	0.23778	0.865274	NA
ARMX2_HUMAN	Q7L311	Armadillo repeat-containing X-linked protein 2	ARMCX2	G-6599_DMSO_60min	-0.101675	0.115233	15.932	0.390707	0.973968	NA
ARMX3_HUMAN	Q9UH62	Armadillo repeat-containing X-linked protein 3	ARMCX3	G-6599_DMSO_30min	-0.012477	0.0849898	15.932	0.885127	0.983677	NA
ARMX3_HUMAN	Q9UH62	Armadillo repeat-containing X-linked protein 3	ARMCX3	G-6599_DMSO_60min	-0.0283959	0.0849898	15.932	0.742655	0.994683	NA
ARMX5_HUMAN	Q6P1M9	Armadillo repeat-containing X-linked protein 5	ARMCX5	G-6599_DMSO_30min	0.0543086	0.1001	15.932	0.594952	0.939563	NA
ARMX5_HUMAN	Q6P1M9	Armadillo repeat-containing X-linked protein 5	ARMCX5	G-6599_DMSO_60min	0.0138584	0.1001	15.932	0.891622	0.996427	NA
ARNT_HUMAN	P27540	Aryl hydrocarbon receptor nuclear translocator	ARNT	G-6599_DMSO_60min	0.107595	0.113997	15.932	0.359345	0.973968	NA
ARNT_HUMAN	P27540	Aryl hydrocarbon receptor nuclear translocator	ARNT	G-6599_DMSO_30min	-0.0743764	0.113997	15.932	0.52342	0.924677	NA
ARNT2_HUMAN	Q9HBZ2	Aryl hydrocarbon receptor nuclear translocator 2	ARNT2	G-6599_DMSO_30min	0.233997	0.145653	15.932	0.127791	0.817854	NA
ARNT2_HUMAN	Q9HBZ2	Aryl hydrocarbon receptor nuclear translocator 2	ARNT2	G-6599_DMSO_60min	0.106201	0.145653	15.932	0.476501	0.982773	NA
AROS_HUMAN	Q86WX3	Active regulator of SIRT1	RPS19BP1	G-6599_DMSO_30min	-0.015501	0.0988733	15.932	0.87739	0.981123	NA
AROS_HUMAN	Q86WX3	Active regulator of SIRT1	RPS19BP1	G-6599_DMSO_60min	0.0512311	0.0988733	15.932	0.611475	0.986136	NA
ARP10_HUMAN	Q9NZ32	Actin-related protein 10	ACTR10	G-6599_DMSO_30min	0.192732	0.0774209	15.932	0.0242377	0.643982	NA
ARP10_HUMAN	Q9NZ32	Actin-related protein 10	ACTR10	G-6599_DMSO_60min	-0.0663279	0.0774209	15.932	0.404303	0.973968	NA
ARP19_HUMAN	P56211	cAMP-regulated phosphoprotein 19	ARPP19	G-6599_DMSO_60min	0.0523844	0.107619	15.932	0.633059	0.986136	NA
ARP19_HUMAN	P56211	cAMP-regulated phosphoprotein 19	ARPP19	G-6599_DMSO_30min	0.0412545	0.107619	15.932	0.706536	0.955538	NA
ARP2_HUMAN	P61160	Actin-related protein 2	ACTR2	G-6599_DMSO_60min	-0.00659561	0.0568644	15.932	0.909111	0.996917	NA
ARP2_HUMAN	P61160	Actin-related protein 2	ACTR2	G-6599_DMSO_30min	0.017176	0.0568644	15.932	0.766519	0.958662	NA
ARP3_HUMAN	P61158	Actin-related protein 3	ACTR3	G-6599_DMSO_60min	0.073326	0.15665	15.932	0.646062	0.986136	NA
ARP3_HUMAN	P61158	Actin-related protein 3	ACTR3	G-6599_DMSO_30min	-0.171555	0.15665	15.932	0.289733	0.870404	NA
ARP3B_HUMAN	Q9P1U1	Actin-related protein 3B	ACTR3B	G-6599_DMSO_60min	0.015784	0.0555173	15.932	0.779836	0.994708	NA
ARP3B_HUMAN	Q9P1U1	Actin-related protein 3B	ACTR3B	G-6599_DMSO_30min	-0.105519	0.0555173	15.932	0.0755955	0.755398	NA
ARP5_HUMAN	Q9H9F9	Actin-related protein 5	ACTR5	G-6599_DMSO_60min	0.0430739	0.0653374	15.932	0.519149	0.983099	NA
ARP5_HUMAN	Q9H9F9	Actin-related protein 5	ACTR5	G-6599_DMSO_30min	0.0220055	0.0653374	15.932	0.740665	0.958559	NA
ARP5L_HUMAN	Q9BPX5	Actin-related protein 2/3 complex subunit 5-like protein	ARPC5L	G-6599_DMSO_60min	0.0462652	0.0667136	15.932	0.497988	0.983099	NA
ARP5L_HUMAN	Q9BPX5	Actin-related protein 2/3 complex subunit 5-like protein	ARPC5L	G-6599_DMSO_30min	-0.0324466	0.0667136	15.932	0.633337	0.944526	NA
ARP6_HUMAN	Q9GZN1	Actin-related protein 6	ACTR6	G-6599_DMSO_30min	0.0540984	0.0966406	15.932	0.583409	0.93774	NA
ARP6_HUMAN	Q9GZN1	Actin-related protein 6	ACTR6	G-6599_DMSO_60min	0.0633993	0.0966406	15.932	0.521166	0.983099	NA
ARP8_HUMAN	Q9H981	Actin-related protein 8	ACTR8	G-6599_DMSO_60min	0.0235471	0.0535775	15.932	0.666206	0.986136	NA
ARP8_HUMAN	Q9H981	Actin-related protein 8	ACTR8	G-6599_DMSO_30min	-0.0221131	0.0535775	15.932	0.685305	0.954734	NA
ARPC2_HUMAN	O15144	Actin-related protein 2/3 complex subunit 2	ARPC2	G-6599_DMSO_60min	-0.0416685	0.147952	15.932	0.781848	0.994708	NA
ARPC2_HUMAN	O15144	Actin-related protein 2/3 complex subunit 2	ARPC2	G-6599_DMSO_30min	-0.0978547	0.147952	15.932	0.51781	0.922729	NA
ARPC3_HUMAN	O15145	Actin-related protein 2/3 complex subunit 3	ARPC3	G-6599_DMSO_30min	-0.0775548	0.0744883	15.932	0.313341	0.87702	NA
ARPC3_HUMAN	O15145	Actin-related protein 2/3 complex subunit 3	ARPC3	G-6599_DMSO_60min	0.00748602	0.0744883	15.932	0.921202	0.996995	NA
ARPC4_HUMAN	P59998	Actin-related protein 2/3 complex subunit 4	ARPC4	G-6599_DMSO_60min	0.110561	0.0786565	15.932	0.179037	0.948862	NA
ARPC4_HUMAN	P59998	Actin-related protein 2/3 complex subunit 4	ARPC4	G-6599_DMSO_30min	0.0418744	0.0786565	15.932	0.601816	0.94089	NA
ARPC5_HUMAN	O15511	Actin-related protein 2/3 complex subunit 5	ARPC5	G-6599_DMSO_30min	0.138763	0.0886467	15.932	0.137146	0.826024	NA
ARPC5_HUMAN	O15511	Actin-related protein 2/3 complex subunit 5	ARPC5	G-6599_DMSO_60min	0.0341536	0.0886467	15.932	0.705127	0.988501	NA
ARPIN_HUMAN	Q7Z6K5	Arpin	ARPIN	G-6599_DMSO_60min	0.072064	0.10518	15.932	0.503095	0.983099	NA
ARPIN_HUMAN	Q7Z6K5	Arpin	ARPIN	G-6599_DMSO_30min	-0.0974813	0.10518	15.932	0.367854	0.893483	NA
ARRB1_HUMAN	P49407	Beta-arrestin-1	ARRB1	G-6599_DMSO_60min	0.0160208	0.0751557	15.932	0.8339	0.994708	NA
ARRB1_HUMAN	P49407	Beta-arrestin-1	ARRB1	G-6599_DMSO_30min	0.103099	0.0751557	15.932	0.189135	0.842723	NA
ARRB2_HUMAN	P32121	Beta-arrestin-2	ARRB2	G-6599_DMSO_30min	-0.0144383	0.0903704	15.932	0.875071	0.980483	NA
ARRB2_HUMAN	P32121	Beta-arrestin-2	ARRB2	G-6599_DMSO_60min	0.129319	0.0903704	15.932	0.171757	0.948862	NA
ARSA_HUMAN	P15289	Arylsulfatase A	ARSA	G-6599_DMSO_60min	-0.0146317	0.0967038	15.932	0.881635	0.996427	NA
ARSA_HUMAN	P15289	Arylsulfatase A	ARSA	G-6599_DMSO_30min	0.0323095	0.0967038	15.932	0.742656	0.958559	NA
ARSB_HUMAN	P15848	Arylsulfatase B	ARSB	G-6599_DMSO_30min	-0.109006	0.0831848	15.932	0.208635	0.849057	NA
ARSB_HUMAN	P15848	Arylsulfatase B	ARSB	G-6599_DMSO_60min	0.0206007	0.0831848	15.932	0.807568	0.994708	NA
ARSD_HUMAN	P51689	Arylsulfatase D	ARSD	G-6599_DMSO_60min	-0.115693	0.110886	15.932	0.312358	0.973968	NA
ARSD_HUMAN	P51689	Arylsulfatase D	ARSD	G-6599_DMSO_30min	0.134414	0.110886	15.932	0.24311	0.86791	NA
ARSK_HUMAN	Q6UWY0	Arylsulfatase K	ARSK	G-6599_DMSO_60min	0.143226	0.132397	15.932	0.295447	0.971303	NA
ARSK_HUMAN	Q6UWY0	Arylsulfatase K	ARSK	G-6599_DMSO_30min	0.0784913	0.132397	15.932	0.561604	0.934669	NA
ARV1_HUMAN	Q9H2C2	Protein ARV1	ARV1	G-6599_DMSO_30min	0.161743	0.12516	15.932	0.214688	0.852115	NA
ARV1_HUMAN	Q9H2C2	Protein ARV1	ARV1	G-6599_DMSO_60min	-0.136626	0.12516	15.932	0.291239	0.969058	NA
ARVC_HUMAN	O00192	Armadillo repeat protein deleted in velo-cardio-facial syndrome	ARVCF	G-6599_DMSO_30min	0.251081	0.084565	15.932	0.00907637	0.505708	NA
ARVC_HUMAN	O00192	Armadillo repeat protein deleted in velo-cardio-facial syndrome	ARVCF	G-6599_DMSO_60min	0.134935	0.084565	15.932	0.130213	0.934825	NA
AS3MT_HUMAN	Q9HBK9	Arsenite methyltransferase	AS3MT	G-6599_DMSO_60min	0.0227086	0.0730543	15.932	0.759948	0.994708	NA
AS3MT_HUMAN	Q9HBK9	Arsenite methyltransferase	AS3MT	G-6599_DMSO_30min	0.00131264	0.0730543	15.932	0.985887	0.998045	NA
ASAH1_HUMAN	Q13510	Acid ceramidase	ASAH1	G-6599_DMSO_30min	0.0427864	0.0705409	15.932	0.552697	0.932566	NA
ASAH1_HUMAN	Q13510	Acid ceramidase	ASAH1	G-6599_DMSO_60min	0.139436	0.0705409	15.932	0.0656526	0.907189	NA
ASAP2_HUMAN	O43150	Arf-GAP with SH3 domain, ANK repeat and PH domain-containing protein 2	ASAP2	G-6599_DMSO_30min	-0.0767463	0.071742	15.932	0.30067	0.872304	NA
ASAP2_HUMAN	O43150	Arf-GAP with SH3 domain, ANK repeat and PH domain-containing protein 2	ASAP2	G-6599_DMSO_60min	0.0272848	0.071742	15.932	0.708731	0.988564	NA
ASAP2_HUMAN	O43150-2	Arf-GAP with SH3 domain, ANK repeat and PH domain-containing protein 2 (isoform 2)	ASAP2	G-6599_DMSO_60min	0.0725284	0.0783083	15.932	0.368165	0.973968	NA
ASAP2_HUMAN	O43150-2	Arf-GAP with SH3 domain, ANK repeat and PH domain-containing protein 2 (isoform 2)	ASAP2	G-6599_DMSO_30min	-0.000356118	0.0783083	15.932	0.996428	0.999742	NA
ASB1_HUMAN	Q9Y576	Ankyrin repeat and SOCS box protein 1	ASB1	G-6599_DMSO_60min	-0.0674738	0.0715412	15.932	0.35969	0.973968	NA
ASB1_HUMAN	Q9Y576	Ankyrin repeat and SOCS box protein 1	ASB1	G-6599_DMSO_30min	-0.0429266	0.0715412	15.932	0.556928	0.932566	NA
ASB13_HUMAN	Q8WXK3	Ankyrin repeat and SOCS box protein 13	ASB13	G-6599_DMSO_30min	-0.0194205	0.0754133	15.932	0.800073	0.968386	NA
ASB13_HUMAN	Q8WXK3	Ankyrin repeat and SOCS box protein 13	ASB13	G-6599_DMSO_60min	0.0580966	0.0754133	15.932	0.45235	0.982449	NA
ASB3_HUMAN	Q9Y575	Ankyrin repeat and SOCS box protein 3	ASB3	G-6599_DMSO_60min	0.0257486	0.138649	15.932	0.855016	0.994708	NA
ASB3_HUMAN	Q9Y575	Ankyrin repeat and SOCS box protein 3	ASB3	G-6599_DMSO_30min	0.042812	0.138649	15.932	0.761491	0.958559	NA
ASB4_HUMAN	Q9Y574	Ankyrin repeat and SOCS box protein 4	ASB4	G-6599_DMSO_30min	-0.211465	0.0664566	15.932	0.00581748	0.427786	NA
ASB4_HUMAN	Q9Y574	Ankyrin repeat and SOCS box protein 4	ASB4	G-6599_DMSO_60min	0.0335933	0.0664566	15.932	0.620134	0.986136	NA
ASB6_HUMAN	Q9NWX5	Ankyrin repeat and SOCS box protein 6	ASB6	G-6599_DMSO_30min	0.0501099	0.109848	15.932	0.65442	0.946911	NA
ASB6_HUMAN	Q9NWX5	Ankyrin repeat and SOCS box protein 6	ASB6	G-6599_DMSO_60min	-0.075969	0.109848	15.932	0.499153	0.983099	NA
ASB7_HUMAN	Q9H672	Ankyrin repeat and SOCS box protein 7	ASB7	G-6599_DMSO_30min	0.0313667	0.0885047	15.932	0.727681	0.957689	NA
ASB7_HUMAN	Q9H672	Ankyrin repeat and SOCS box protein 7	ASB7	G-6599_DMSO_60min	0.0897777	0.0885047	15.932	0.325558	0.973968	NA
ASB8_HUMAN	Q9H765	Ankyrin repeat and SOCS box protein 8	ASB8	G-6599_DMSO_30min	-0.263938	0.110532	15.932	0.0296829	0.66899	NA
ASB8_HUMAN	Q9H765	Ankyrin repeat and SOCS box protein 8	ASB8	G-6599_DMSO_60min	0.17699	0.110532	15.932	0.12896	0.934825	NA
ASCC1_HUMAN	Q8N9N2	Activating signal cointegrator 1 complex subunit 1	ASCC1	G-6599_DMSO_60min	0.0823551	0.0836331	15.932	0.339481	0.973968	NA
ASCC1_HUMAN	Q8N9N2	Activating signal cointegrator 1 complex subunit 1	ASCC1	G-6599_DMSO_30min	0.00428195	0.0836331	15.932	0.959803	0.992911	NA
ASCC2_HUMAN	Q9H1I8	Activating signal cointegrator 1 complex subunit 2	ASCC2	G-6599_DMSO_60min	0.0310134	0.0748741	15.932	0.684245	0.987123	NA
ASCC2_HUMAN	Q9H1I8	Activating signal cointegrator 1 complex subunit 2	ASCC2	G-6599_DMSO_30min	-0.110526	0.0748741	15.932	0.159394	0.833394	NA
ASCC3_HUMAN	Q8N3C0	Activating signal cointegrator 1 complex subunit 3	ASCC3	G-6599_DMSO_30min	0.00658557	0.0602932	15.932	0.914387	0.98622	NA
ASCC3_HUMAN	Q8N3C0	Activating signal cointegrator 1 complex subunit 3	ASCC3	G-6599_DMSO_60min	-0.0202859	0.0602932	15.932	0.740919	0.993608	NA
ASF1A_HUMAN	Q9Y294	Histone chaperone ASF1A	ASF1A	G-6599_DMSO_30min	-0.124003	0.0748352	15.932	0.117074	0.809448	NA
ASF1A_HUMAN	Q9Y294	Histone chaperone ASF1A	ASF1A	G-6599_DMSO_60min	0.0267381	0.0748352	15.932	0.725561	0.991218	NA
ASF1B_HUMAN	Q9NVP2	Histone chaperone ASF1B	ASF1B	G-6599_DMSO_30min	-0.288556	0.187805	15.932	0.144044	0.826108	NA
ASF1B_HUMAN	Q9NVP2	Histone chaperone ASF1B	ASF1B	G-6599_DMSO_60min	0.343012	0.187805	15.932	0.086583	0.923135	NA
ASGL1_HUMAN	Q7L266	Isoaspartyl peptidase/L-asparaginase	ASRGL1	G-6599_DMSO_60min	-0.00707538	0.0673589	15.932	0.917655	0.996995	NA
ASGL1_HUMAN	Q7L266	Isoaspartyl peptidase/L-asparaginase	ASRGL1	G-6599_DMSO_30min	0.10472	0.0673589	15.932	0.139667	0.826024	NA
ASH1L_HUMAN	Q9NR48	Histone-lysine N-methyltransferase ASH1L	ASH1L	G-6599_DMSO_60min	-0.0713637	0.0588669	15.932	0.243073	0.957205	NA
ASH1L_HUMAN	Q9NR48	Histone-lysine N-methyltransferase ASH1L	ASH1L	G-6599_DMSO_30min	-0.00269831	0.0588669	15.932	0.964009	0.99348	NA
ASH2L_HUMAN	Q9UBL3	Set1/Ash2 histone methyltransferase complex subunit ASH2	ASH2L	G-6599_DMSO_60min	0.0224345	0.0538887	15.932	0.682736	0.987123	NA
ASH2L_HUMAN	Q9UBL3	Set1/Ash2 histone methyltransferase complex subunit ASH2	ASH2L	G-6599_DMSO_30min	-0.0291284	0.0538887	15.932	0.596309	0.939563	NA
ASHWN_HUMAN	Q9BVC5	Ashwin	C2orf49	G-6599_DMSO_30min	0.0861316	0.0834784	15.932	0.317583	0.877491	NA
ASHWN_HUMAN	Q9BVC5	Ashwin	C2orf49	G-6599_DMSO_60min	0.00386275	0.0834784	15.932	0.963668	0.998108	NA
ASHWN_HUMAN	Q9BVC5-2	Ashwin (isoform 2)	C2orf49	G-6599_DMSO_60min	0.177549	0.0884949	15.932	0.062106	0.907189	NA
ASHWN_HUMAN	Q9BVC5-2	Ashwin (isoform 2)	C2orf49	G-6599_DMSO_30min	-0.0714618	0.0884949	15.932	0.431256	0.907702	NA
ASML_HUMAN	O95671	N-acetylserotonin O-methyltransferase-like protein	ASMTL	G-6599_DMSO_30min	0.00832844	0.110518	15.932	0.940868	0.991454	NA
ASML_HUMAN	O95671	N-acetylserotonin O-methyltransferase-like protein	ASMTL	G-6599_DMSO_60min	0.0946139	0.110518	15.932	0.404639	0.973968	NA
ASND1_HUMAN	Q9NWL6	Asparagine synthetase domain-containing protein 1	ASNSD1	G-6599_DMSO_30min	0.13382	0.114403	15.932	0.259315	0.870404	NA
ASND1_HUMAN	Q9NWL6	Asparagine synthetase domain-containing protein 1	ASNSD1	G-6599_DMSO_60min	0.0369998	0.114403	15.932	0.750587	0.994708	NA
ASNS_HUMAN	P08243	Asparagine synthetase [glutamine-hydrolyzing]	ASNS	G-6599_DMSO_30min	-0.282833	0.0992838	15.932	0.0116485	0.555867	NA
ASNS_HUMAN	P08243	Asparagine synthetase [glutamine-hydrolyzing]	ASNS	G-6599_DMSO_60min	0.0477202	0.0992838	15.932	0.637303	0.986136	NA
ASPC1_HUMAN	Q9BZE9	Tether containing UBX domain for GLUT4	ASPSCR1	G-6599_DMSO_60min	0.0411095	0.0744607	15.932	0.588544	0.986136	NA
ASPC1_HUMAN	Q9BZE9	Tether containing UBX domain for GLUT4	ASPSCR1	G-6599_DMSO_30min	-0.0121481	0.0744607	15.932	0.872454	0.979714	NA
ASPH_HUMAN	Q12797	Aspartyl/asparaginyl beta-hydroxylase	ASPH	G-6599_DMSO_30min	0.0907599	0.175358	15.932	0.61187	0.941493	NA
ASPH_HUMAN	Q12797	Aspartyl/asparaginyl beta-hydroxylase	ASPH	G-6599_DMSO_60min	-0.130298	0.175358	15.932	0.468273	0.982773	NA
ASPH1_HUMAN	Q5U4P2	Aspartate beta-hydroxylase domain-containing protein 1	ASPHD1	G-6599_DMSO_60min	-0.164663	0.0997973	15.932	0.11852	0.934825	NA
ASPH1_HUMAN	Q5U4P2	Aspartate beta-hydroxylase domain-containing protein 1	ASPHD1	G-6599_DMSO_30min	0.143784	0.0997973	15.932	0.169015	0.833529	NA
ASPH2_HUMAN	Q6ICH7	Aspartate beta-hydroxylase domain-containing protein 2	ASPHD2	G-6599_DMSO_60min	-0.110126	0.130873	15.932	0.412536	0.977137	NA
ASPH2_HUMAN	Q6ICH7	Aspartate beta-hydroxylase domain-containing protein 2	ASPHD2	G-6599_DMSO_30min	0.282155	0.130873	15.932	0.0467248	0.73288	NA
ASPM_HUMAN	Q8IZT6	Abnormal spindle-like microcephaly-associated protein	ASPM	G-6599_DMSO_30min	-0.149069	0.0714152	15.932	0.0532809	0.734656	NA
ASPM_HUMAN	Q8IZT6	Abnormal spindle-like microcephaly-associated protein	ASPM	G-6599_DMSO_60min	-0.0136381	0.0714152	15.932	0.850962	0.994708	NA
ASPM_HUMAN	Q8IZT6-2	Abnormal spindle-like microcephaly-associated protein (isoform 2)	ASPM	G-6599_DMSO_30min	-0.214935	0.144999	15.932	0.157762	0.833394	NA
ASPM_HUMAN	Q8IZT6-2	Abnormal spindle-like microcephaly-associated protein (isoform 2)	ASPM	G-6599_DMSO_60min	0.0750349	0.144999	15.932	0.611926	0.986136	NA
ASPP1_HUMAN	Q96KQ4	Apoptosis-stimulating of p53 protein 1	PPP1R13B	G-6599_DMSO_30min	0.447974	0.191656	15.932	0.0328025	0.686992	NA
ASPP1_HUMAN	Q96KQ4	Apoptosis-stimulating of p53 protein 1	PPP1R13B	G-6599_DMSO_60min	0.0665466	0.191656	15.932	0.73297	0.992386	NA
ASPP2_HUMAN	Q13625	Apoptosis-stimulating of p53 protein 2	TP53BP2	G-6599_DMSO_30min	0.000159277	0.0637137	15.932	0.998036	0.999742	NA
ASPP2_HUMAN	Q13625	Apoptosis-stimulating of p53 protein 2	TP53BP2	G-6599_DMSO_60min	-0.0943882	0.0637137	15.932	0.157995	0.941362	NA
ASTRA_HUMAN	Q96CP6	NA	NA	G-6599_DMSO_30min	0.00746415	0.0993059	15.932	0.941021	0.991481	NA
ASTRA_HUMAN	Q96CP6	NA	NA	G-6599_DMSO_60min	-0.118466	0.0993059	15.932	0.250357	0.957205	NA
ASURF_HUMAN	L0R819	NA	NA	G-6599_DMSO_30min	0.0138918	0.06776	15.932	0.840157	0.973571	NA
ASURF_HUMAN	L0R819	NA	NA	G-6599_DMSO_60min	-0.0494134	0.06776	15.932	0.476439	0.982773	NA
ASXL1_HUMAN	Q8IXJ9	Putative Polycomb group protein ASXL1	ASXL1	G-6599_DMSO_30min	0.206798	0.106384	15.932	0.0697865	0.743939	NA
ASXL1_HUMAN	Q8IXJ9	Putative Polycomb group protein ASXL1	ASXL1	G-6599_DMSO_60min	0.0414036	0.106384	15.932	0.702287	0.988501	NA
ASXL2_HUMAN	Q76L83	Putative Polycomb group protein ASXL2	ASXL2	G-6599_DMSO_30min	0.111308	0.0789035	15.932	0.177563	0.834008	NA
ASXL2_HUMAN	Q76L83	Putative Polycomb group protein ASXL2	ASXL2	G-6599_DMSO_60min	0.0623915	0.0789035	15.932	0.440713	0.980183	NA
AT11A_HUMAN	P98196	Probable phospholipid-transporting ATPase IH	ATP11A	G-6599_DMSO_30min	0.0481407	0.0849602	15.932	0.578864	0.937019	NA
AT11A_HUMAN	P98196	Probable phospholipid-transporting ATPase IH	ATP11A	G-6599_DMSO_60min	0.0606736	0.0849602	15.932	0.485472	0.983099	NA
AT11B_HUMAN	Q9Y2G3	Probable phospholipid-transporting ATPase IF	ATP11B	G-6599_DMSO_30min	0.0805532	0.102289	15.932	0.442544	0.909483	NA
AT11B_HUMAN	Q9Y2G3	Probable phospholipid-transporting ATPase IF	ATP11B	G-6599_DMSO_60min	0.0533166	0.102289	15.932	0.609372	0.986136	NA
AT11C_HUMAN	Q8NB49	Phospholipid-transporting ATPase IG	ATP11C	G-6599_DMSO_30min	0.083916	0.0671832	15.932	0.229683	0.860366	NA
AT11C_HUMAN	Q8NB49	Phospholipid-transporting ATPase IG	ATP11C	G-6599_DMSO_60min	0.13963	0.0671832	15.932	0.0542016	0.907189	NA
AT131_HUMAN	Q9HD20	Manganese-transporting ATPase 13A1	ATP13A1	G-6599_DMSO_60min	-0.159037	0.13453	15.932	0.254481	0.957205	NA
AT131_HUMAN	Q9HD20	Manganese-transporting ATPase 13A1	ATP13A1	G-6599_DMSO_30min	0.080538	0.13453	15.932	0.557814	0.932566	NA
AT132_HUMAN	Q9NQ11	Probable cation-transporting ATPase 13A2	ATP13A2	G-6599_DMSO_60min	0.121145	0.0983056	15.932	0.235704	0.957205	NA
AT132_HUMAN	Q9NQ11	Probable cation-transporting ATPase 13A2	ATP13A2	G-6599_DMSO_30min	0.0570584	0.0983056	15.932	0.569751	0.936266	NA
AT133_HUMAN	Q9H7F0	Probable cation-transporting ATPase 13A3	ATP13A3	G-6599_DMSO_60min	0.035342	0.0715272	15.932	0.627975	0.986136	NA
AT133_HUMAN	Q9H7F0	Probable cation-transporting ATPase 13A3	ATP13A3	G-6599_DMSO_30min	0.117123	0.0715272	15.932	0.121131	0.813489	NA
AT135_HUMAN	Q4VNC0	Probable cation-transporting ATPase 13A5	ATP13A5	G-6599_DMSO_60min	-0.589614	0.233348	15.932	0.0224834	0.89355	NA
AT135_HUMAN	Q4VNC0	Probable cation-transporting ATPase 13A5	ATP13A5	G-6599_DMSO_30min	0.0132942	0.233348	15.932	0.955276	0.992026	NA
AT1A1_HUMAN	P05023	Sodium/potassium-transporting ATPase subunit alpha-1	ATP1A1	G-6599_DMSO_30min	0.256546	0.10967	15.932	0.0326819	0.686088	NA
AT1A1_HUMAN	P05023	Sodium/potassium-transporting ATPase subunit alpha-1	ATP1A1	G-6599_DMSO_60min	0.0227174	0.10967	15.932	0.838522	0.994708	NA
AT1A3_HUMAN	P13637	Sodium/potassium-transporting ATPase subunit alpha-3	ATP1A3	G-6599_DMSO_60min	-0.0923648	0.218138	15.932	0.677647	0.987123	NA
AT1A3_HUMAN	P13637	Sodium/potassium-transporting ATPase subunit alpha-3	ATP1A3	G-6599_DMSO_30min	-0.0401281	0.218138	15.932	0.856368	0.976266	NA
AT1B1_HUMAN	P05026	Sodium/potassium-transporting ATPase subunit beta-1	ATP1B1	G-6599_DMSO_30min	0.170735	0.0981602	15.932	0.101254	0.794685	NA
AT1B1_HUMAN	P05026	Sodium/potassium-transporting ATPase subunit beta-1	ATP1B1	G-6599_DMSO_60min	0.0559736	0.0981602	15.932	0.576478	0.986136	NA
AT1B3_HUMAN	P54709	Sodium/potassium-transporting ATPase subunit beta-3	ATP1B3	G-6599_DMSO_30min	0.133253	0.0914236	15.932	0.164397	0.833394	NA
AT1B3_HUMAN	P54709	Sodium/potassium-transporting ATPase subunit beta-3	ATP1B3	G-6599_DMSO_60min	-0.0531809	0.0914236	15.932	0.56891	0.985139	NA
AT2A1_HUMAN	O14983	Sarcoplasmic/endoplasmic reticulum calcium ATPase 1	ATP2A1	G-6599_DMSO_30min	0.0681864	0.12674	15.932	0.598011	0.939563	NA
AT2A1_HUMAN	O14983	Sarcoplasmic/endoplasmic reticulum calcium ATPase 1	ATP2A1	G-6599_DMSO_60min	-0.10355	0.12674	15.932	0.425964	0.979952	NA
AT2A2_HUMAN	P16615	Sarcoplasmic/endoplasmic reticulum calcium ATPase 2	ATP2A2	G-6599_DMSO_60min	-0.361646	0.199921	15.932	0.0893692	0.926095	NA
AT2A2_HUMAN	P16615	Sarcoplasmic/endoplasmic reticulum calcium ATPase 2	ATP2A2	G-6599_DMSO_30min	-0.00268831	0.199921	15.932	0.989438	0.99878	NA
AT2B1_HUMAN	P20020	Plasma membrane calcium-transporting ATPase 1	ATP2B1	G-6599_DMSO_30min	0.165912	0.098473	15.932	0.111503	0.806011	NA
AT2B1_HUMAN	P20020	Plasma membrane calcium-transporting ATPase 1	ATP2B1	G-6599_DMSO_60min	0.0624179	0.098473	15.932	0.535168	0.983099	NA
AT2B4_HUMAN	P23634	Plasma membrane calcium-transporting ATPase 4	ATP2B4	G-6599_DMSO_60min	0.00597434	0.103862	15.932	0.954845	0.997441	NA
AT2B4_HUMAN	P23634	Plasma membrane calcium-transporting ATPase 4	ATP2B4	G-6599_DMSO_30min	0.377367	0.103862	15.932	0.00224949	0.32183	NA
AT2C1_HUMAN	P98194	Calcium-transporting ATPase type 2C member 1	ATP2C1	G-6599_DMSO_30min	0.0476276	0.0723406	15.932	0.519696	0.923397	NA
AT2C1_HUMAN	P98194	Calcium-transporting ATPase type 2C member 1	ATP2C1	G-6599_DMSO_60min	-0.0060482	0.0723406	15.932	0.93441	0.996995	NA
AT2L2_HUMAN	Q8IUZ5	5-phosphohydroxy-L-lysine phospho-lyase	PHYKPL	G-6599_DMSO_60min	0.114407	0.0690085	15.932	0.1169	0.934825	NA
AT2L2_HUMAN	Q8IUZ5	5-phosphohydroxy-L-lysine phospho-lyase	PHYKPL	G-6599_DMSO_30min	0.0271716	0.0690085	15.932	0.69899	0.955538	NA
AT5EL_HUMAN	Q5VTU8	ATP synthase subunit epsilon-like protein, mitochondrial	ATP5EP2	G-6599_DMSO_60min	-0.170518	0.181902	15.932	0.362539	0.973968	NA
AT5EL_HUMAN	Q5VTU8	ATP synthase subunit epsilon-like protein, mitochondrial	ATP5EP2	G-6599_DMSO_30min	-0.057171	0.181902	15.932	0.757375	0.958559	NA
AT5F1_HUMAN	P24539	ATP synthase F(0) complex subunit B1, mitochondrial	ATP5F1	G-6599_DMSO_60min	-0.191642	0.109023	15.932	0.0979741	0.934825	NA
AT5F1_HUMAN	P24539	ATP synthase F(0) complex subunit B1, mitochondrial	ATP5F1	G-6599_DMSO_30min	-0.0670388	0.109023	15.932	0.547302	0.930884	NA
AT7L1_HUMAN	Q9ULK2	Ataxin-7-like protein 1	ATXN7L1	G-6599_DMSO_60min	0.0698673	0.100972	15.932	0.498932	0.983099	NA
AT7L1_HUMAN	Q9ULK2	Ataxin-7-like protein 1	ATXN7L1	G-6599_DMSO_30min	0.0725886	0.100972	15.932	0.482616	0.918474	NA
AT7L2_HUMAN	Q5T6C5	Ataxin-7-like protein 2	ATXN7L2	G-6599_DMSO_30min	0.131594	0.0993581	15.932	0.204042	0.845623	NA
AT7L2_HUMAN	Q5T6C5	Ataxin-7-like protein 2	ATXN7L2	G-6599_DMSO_60min	-0.0170993	0.0993581	15.932	0.865527	0.996127	NA
AT7L3_HUMAN	Q14CW9	Ataxin-7-like protein 3	ATXN7L3	G-6599_DMSO_30min	-0.159818	0.144017	15.932	0.283589	0.870404	NA
AT7L3_HUMAN	Q14CW9	Ataxin-7-like protein 3	ATXN7L3	G-6599_DMSO_60min	0.0169773	0.144017	15.932	0.907633	0.996648	NA
AT8B1_HUMAN	O43520	Phospholipid-transporting ATPase IC	ATP8B1	G-6599_DMSO_60min	0.133143	0.0908845	15.932	0.162384	0.94353	NA
AT8B1_HUMAN	O43520	Phospholipid-transporting ATPase IC	ATP8B1	G-6599_DMSO_30min	0.0903776	0.0908845	15.932	0.334881	0.885453	NA
ATAD1_HUMAN	Q8NBU5	ATPase family AAA domain-containing protein 1	ATAD1	G-6599_DMSO_30min	-0.0590606	0.112104	15.932	0.605566	0.941094	NA
ATAD1_HUMAN	Q8NBU5	ATPase family AAA domain-containing protein 1	ATAD1	G-6599_DMSO_60min	-0.247402	0.112104	15.932	0.0423437	0.907189	NA
ATAD2_HUMAN	Q6PL18	ATPase family AAA domain-containing protein 2	ATAD2	G-6599_DMSO_30min	0.0592973	0.0831726	15.932	0.486193	0.919405	NA
ATAD2_HUMAN	Q6PL18	ATPase family AAA domain-containing protein 2	ATAD2	G-6599_DMSO_60min	0.0785837	0.0831726	15.932	0.358857	0.973968	NA
ATAD5_HUMAN	Q96QE3	ATPase family AAA domain-containing protein 5	ATAD5	G-6599_DMSO_30min	-0.0523927	0.085091	15.932	0.546772	0.930884	NA
ATAD5_HUMAN	Q96QE3	ATPase family AAA domain-containing protein 5	ATAD5	G-6599_DMSO_60min	0.071007	0.085091	15.932	0.416347	0.97821	NA
ATAT_HUMAN	Q5SQI0	Alpha-tubulin N-acetyltransferase 1	ATAT1	G-6599_DMSO_30min	0.0271504	0.0642671	15.932	0.678334	0.952528	NA
ATAT_HUMAN	Q5SQI0	Alpha-tubulin N-acetyltransferase 1	ATAT1	G-6599_DMSO_60min	0.0869473	0.0642671	15.932	0.194974	0.957205	NA
ATD2B_HUMAN	Q9ULI0	ATPase family AAA domain-containing protein 2B	ATAD2B	G-6599_DMSO_30min	0.0246624	0.104249	15.932	0.816004	0.969507	NA
ATD2B_HUMAN	Q9ULI0	ATPase family AAA domain-containing protein 2B	ATAD2B	G-6599_DMSO_60min	0.157496	0.104249	15.932	0.150427	0.935452	NA
ATD3A_HUMAN	Q9NVI7	ATPase family AAA domain-containing protein 3A	ATAD3A	G-6599_DMSO_30min	-0.0859229	0.158591	15.932	0.595461	0.939563	NA
ATD3A_HUMAN	Q9NVI7	ATPase family AAA domain-containing protein 3A	ATAD3A	G-6599_DMSO_60min	-0.308895	0.158591	15.932	0.0692888	0.907189	NA
ATE1_HUMAN	O95260	Arginyl-tRNA--protein transferase 1	ATE1	G-6599_DMSO_60min	-0.0802864	0.0885174	15.932	0.377915	0.973968	NA
ATE1_HUMAN	O95260	Arginyl-tRNA--protein transferase 1	ATE1	G-6599_DMSO_30min	-0.102712	0.0885174	15.932	0.262996	0.870404	NA
ATE1_HUMAN	O95260-2	Arginyl-tRNA--protein transferase 1 (isoform 2)	ATE1	G-6599_DMSO_60min	-0.0264366	0.0821085	15.932	0.75166	0.994708	NA
ATE1_HUMAN	O95260-2	Arginyl-tRNA--protein transferase 1 (isoform 2)	ATE1	G-6599_DMSO_30min	0.0567741	0.0821085	15.932	0.499235	0.920487	NA
ATF1_HUMAN	P18846	Cyclic AMP-dependent transcription factor ATF-1	ATF1	G-6599_DMSO_60min	-0.195996	0.077192	15.932	0.0219324	0.89355	NA
ATF1_HUMAN	P18846	Cyclic AMP-dependent transcription factor ATF-1	ATF1	G-6599_DMSO_30min	-0.0802721	0.077192	15.932	0.313911	0.87702	NA
ATF2_HUMAN	P15336	Cyclic AMP-dependent transcription factor ATF-2	ATF2	G-6599_DMSO_60min	-0.0582359	0.0985471	15.932	0.562848	0.985139	NA
ATF2_HUMAN	P15336	Cyclic AMP-dependent transcription factor ATF-2	ATF2	G-6599_DMSO_30min	-0.0781509	0.0985471	15.932	0.439411	0.909483	NA
ATF3_HUMAN	P18847	Cyclic AMP-dependent transcription factor ATF-3	ATF3	G-6599_DMSO_30min	0.275613	0.124817	15.932	0.0422426	0.73288	NA
ATF3_HUMAN	P18847	Cyclic AMP-dependent transcription factor ATF-3	ATF3	G-6599_DMSO_60min	-0.067421	0.124817	15.932	0.596559	0.986136	NA
ATF6A_HUMAN	P18850	Cyclic AMP-dependent transcription factor ATF-6 alpha	ATF6	G-6599_DMSO_60min	0.149455	0.095686	15.932	0.137946	0.934825	NA
ATF6A_HUMAN	P18850	Cyclic AMP-dependent transcription factor ATF-6 alpha	ATF6	G-6599_DMSO_30min	0.286036	0.095686	15.932	0.00870203	0.505708	NA
ATF6B_HUMAN	Q99941	Cyclic AMP-dependent transcription factor ATF-6 beta	ATF6B	G-6599_DMSO_60min	-0.0830333	0.0984262	15.932	0.411376	0.977137	NA
ATF6B_HUMAN	Q99941	Cyclic AMP-dependent transcription factor ATF-6 beta	ATF6B	G-6599_DMSO_30min	0.142589	0.0984262	15.932	0.166821	0.833529	NA
ATF7_HUMAN	P17544	Cyclic AMP-dependent transcription factor ATF-7	ATF7	G-6599_DMSO_60min	0.0851969	0.079155	15.932	0.297809	0.973683	NA
ATF7_HUMAN	P17544	Cyclic AMP-dependent transcription factor ATF-7	ATF7	G-6599_DMSO_30min	-0.0292643	0.079155	15.932	0.716468	0.956976	NA
ATG12_HUMAN	O94817	Ubiquitin-like protein ATG12	ATG12	G-6599_DMSO_60min	0.284724	0.149472	15.932	0.0750112	0.907189	NA
ATG12_HUMAN	O94817	Ubiquitin-like protein ATG12	ATG12	G-6599_DMSO_30min	0.0268065	0.149472	15.932	0.859931	0.977866	NA
ATG13_HUMAN	O75143	Autophagy-related protein 13	ATG13	G-6599_DMSO_60min	0.126993	0.0947653	15.932	0.199021	0.957205	NA
ATG13_HUMAN	O75143	Autophagy-related protein 13	ATG13	G-6599_DMSO_30min	-0.0635175	0.0947653	15.932	0.51229	0.920487	NA
ATG2A_HUMAN	Q2TAZ0	Autophagy-related protein 2 homolog A	ATG2A	G-6599_DMSO_60min	0.0526806	0.069203	15.932	0.45763	0.982449	NA
ATG2A_HUMAN	Q2TAZ0	Autophagy-related protein 2 homolog A	ATG2A	G-6599_DMSO_30min	-0.112743	0.069203	15.932	0.122888	0.813489	NA
ATG2B_HUMAN	Q96BY7	Autophagy-related protein 2 homolog B	ATG2B	G-6599_DMSO_60min	0.0226123	0.0815447	15.932	0.785116	0.994708	NA
ATG2B_HUMAN	Q96BY7	Autophagy-related protein 2 homolog B	ATG2B	G-6599_DMSO_30min	-0.0739245	0.0815447	15.932	0.378151	0.89573	NA
ATG3_HUMAN	Q9NT62	Ubiquitin-like-conjugating enzyme ATG3	ATG3	G-6599_DMSO_30min	-0.14533	0.0824937	15.932	0.0972921	0.790877	NA
ATG3_HUMAN	Q9NT62	Ubiquitin-like-conjugating enzyme ATG3	ATG3	G-6599_DMSO_60min	-0.0117529	0.0824937	15.932	0.888495	0.996427	NA
ATG4B_HUMAN	Q9Y4P1	Cysteine protease ATG4B	ATG4B	G-6599_DMSO_60min	0.0315265	0.103658	15.932	0.764958	0.994708	NA
ATG4B_HUMAN	Q9Y4P1	Cysteine protease ATG4B	ATG4B	G-6599_DMSO_30min	-0.147755	0.103658	15.932	0.173337	0.834008	NA
ATG4C_HUMAN	Q96DT6	Cysteine protease ATG4C	ATG4C	G-6599_DMSO_30min	0.193721	0.101158	15.932	0.0736186	0.750562	NA
ATG4C_HUMAN	Q96DT6	Cysteine protease ATG4C	ATG4C	G-6599_DMSO_60min	-0.0664219	0.101158	15.932	0.520801	0.983099	NA
ATG4D_HUMAN	Q86TL0	Cysteine protease ATG4D	ATG4D	G-6599_DMSO_30min	-0.0596327	0.128551	15.932	0.649007	0.944856	NA
ATG4D_HUMAN	Q86TL0	Cysteine protease ATG4D	ATG4D	G-6599_DMSO_60min	-0.149314	0.128551	15.932	0.262539	0.957205	NA
ATG5_HUMAN	Q9H1Y0	Autophagy protein 5	ATG5	G-6599_DMSO_60min	0.0807678	0.0628868	15.932	0.217386	0.957205	NA
ATG5_HUMAN	Q9H1Y0	Autophagy protein 5	ATG5	G-6599_DMSO_30min	-0.00923334	0.0628868	15.932	0.885112	0.983677	NA
ATG7_HUMAN	O95352	Ubiquitin-like modifier-activating enzyme ATG7	ATG7	G-6599_DMSO_30min	-0.0321615	0.0665258	15.932	0.635358	0.944526	NA
ATG7_HUMAN	O95352	Ubiquitin-like modifier-activating enzyme ATG7	ATG7	G-6599_DMSO_60min	0.0319898	0.0665258	15.932	0.637151	0.986136	NA
ATG9A_HUMAN	Q7Z3C6	Autophagy-related protein 9A	ATG9A	G-6599_DMSO_30min	0.00497202	0.099967	15.932	0.96095	0.99348	NA
ATG9A_HUMAN	Q7Z3C6	Autophagy-related protein 9A	ATG9A	G-6599_DMSO_60min	-0.0287986	0.099967	15.932	0.776998	0.994708	NA
ATGA1_HUMAN	Q9BSB4	Autophagy-related protein 101	ATG101	G-6599_DMSO_60min	-0.0139534	0.156781	15.932	0.930192	0.996995	NA
ATGA1_HUMAN	Q9BSB4	Autophagy-related protein 101	ATG101	G-6599_DMSO_30min	-0.0871736	0.156781	15.932	0.585922	0.93774	NA
ATIF1_HUMAN	Q9UII2	ATPase inhibitor, mitochondrial	ATPIF1	G-6599_DMSO_30min	0.0851592	0.13641	15.932	0.541275	0.929122	NA
ATIF1_HUMAN	Q9UII2	ATPase inhibitor, mitochondrial	ATPIF1	G-6599_DMSO_60min	-0.154114	0.13641	15.932	0.275289	0.961247	NA
ATL4_HUMAN	Q6UY14	ADAMTS-like protein 4	ADAMTSL4	G-6599_DMSO_60min	0.106761	0.184533	15.932	0.570983	0.985139	NA
ATL4_HUMAN	Q6UY14	ADAMTS-like protein 4	ADAMTSL4	G-6599_DMSO_30min	0.18688	0.184533	15.932	0.32633	0.881853	NA
ATLA1_HUMAN	Q8WXF7	Atlastin-1	ATL1	G-6599_DMSO_30min	0.0804672	0.15039	15.932	0.6	0.939832	NA
ATLA1_HUMAN	Q8WXF7	Atlastin-1	ATL1	G-6599_DMSO_60min	-0.0598019	0.15039	15.932	0.696169	0.988501	NA
ATLA2_HUMAN	Q8NHH9	Atlastin-2	ATL2	G-6599_DMSO_30min	0.00499704	0.079826	15.932	0.950864	0.991979	NA
ATLA2_HUMAN	Q8NHH9	Atlastin-2	ATL2	G-6599_DMSO_60min	-0.0550563	0.079826	15.932	0.500304	0.983099	NA
ATLA3_HUMAN	Q6DD88	Atlastin-3	ATL3	G-6599_DMSO_60min	-0.592451	0.347145	15.932	0.107301	0.934825	NA
ATLA3_HUMAN	Q6DD88	Atlastin-3	ATL3	G-6599_DMSO_30min	-0.0417691	0.347145	15.932	0.905733	0.98622	NA
ATM_HUMAN	Q13315	Serine-protein kinase ATM	ATM	G-6599_DMSO_30min	0.0119445	0.0577981	15.932	0.838894	0.973401	NA
ATM_HUMAN	Q13315	Serine-protein kinase ATM	ATM	G-6599_DMSO_60min	0.0834281	0.0577981	15.932	0.168271	0.948862	NA
ATN1_HUMAN	P54259	Atrophin-1	ATN1	G-6599_DMSO_60min	0.0581474	0.0827203	15.932	0.492238	0.983099	NA
ATN1_HUMAN	P54259	Atrophin-1	ATN1	G-6599_DMSO_30min	-0.0567165	0.0827203	15.932	0.502795	0.920487	NA
ATOX1_HUMAN	O00244	Copper transport protein ATOX1	ATOX1	G-6599_DMSO_30min	-0.109685	0.110175	15.932	0.334348	0.885453	NA
ATOX1_HUMAN	O00244	Copper transport protein ATOX1	ATOX1	G-6599_DMSO_60min	0.152124	0.110175	15.932	0.18642	0.957205	NA
ATP23_HUMAN	Q9Y6H3	Mitochondrial inner membrane protease ATP23 homolog	XRCC6BP1	G-6599_DMSO_30min	0.0266651	0.0685426	15.932	0.702404	0.955538	NA
ATP23_HUMAN	Q9Y6H3	Mitochondrial inner membrane protease ATP23 homolog	XRCC6BP1	G-6599_DMSO_60min	0.016891	0.0685426	15.932	0.808495	0.994708	NA
ATP5H_HUMAN	O75947	ATP synthase subunit d, mitochondrial	ATP5H	G-6599_DMSO_30min	-0.0893287	0.192055	15.932	0.64814	0.944856	NA
ATP5H_HUMAN	O75947	ATP synthase subunit d, mitochondrial	ATP5H	G-6599_DMSO_60min	-0.180462	0.192055	15.932	0.361433	0.973968	NA
ATP5I_HUMAN	P56385	ATP synthase subunit e, mitochondrial	ATP5I	G-6599_DMSO_60min	-0.134744	0.15667	15.932	0.40252	0.973968	NA
ATP5I_HUMAN	P56385	ATP synthase subunit e, mitochondrial	ATP5I	G-6599_DMSO_30min	-0.0855876	0.15667	15.932	0.592434	0.93939	NA
ATP5J_HUMAN	P18859	ATP synthase-coupling factor 6, mitochondrial	ATP5J	G-6599_DMSO_30min	-0.0531801	0.150564	15.932	0.728565	0.957689	NA
ATP5J_HUMAN	P18859	ATP synthase-coupling factor 6, mitochondrial	ATP5J	G-6599_DMSO_60min	-0.176076	0.150564	15.932	0.259424	0.957205	NA
ATP5L_HUMAN	O75964	ATP synthase subunit g, mitochondrial	ATP5L	G-6599_DMSO_60min	-0.755228	0.120063	15.932	1.09764e-05	0.0194502	NA
ATP5L_HUMAN	O75964	ATP synthase subunit g, mitochondrial	ATP5L	G-6599_DMSO_30min	-0.00628952	0.120063	15.932	0.958873	0.992911	NA
ATP5S_HUMAN	Q99766	ATP synthase subunit s, mitochondrial	ATP5S	G-6599_DMSO_60min	-0.257611	0.14866	15.932	0.102424	0.934825	NA
ATP5S_HUMAN	Q99766	ATP synthase subunit s, mitochondrial	ATP5S	G-6599_DMSO_30min	-0.0459238	0.14866	15.932	0.761387	0.958559	NA
ATP68_HUMAN	P56378	NA	NA	G-6599_DMSO_30min	-0.16052	0.142943	15.932	0.27809	0.870404	NA
ATP68_HUMAN	P56378	NA	NA	G-6599_DMSO_60min	-0.225831	0.142943	15.932	0.133783	0.934825	NA
ATP7A_HUMAN	Q04656	Copper-transporting ATPase 1	ATP7A	G-6599_DMSO_60min	0.0874096	0.0871794	15.932	0.33102	0.973968	NA
ATP7A_HUMAN	Q04656	Copper-transporting ATPase 1	ATP7A	G-6599_DMSO_30min	0.169292	0.0871794	15.932	0.070048	0.743939	NA
ATP7B_HUMAN	P35670	Copper-transporting ATPase 2	ATP7B	G-6599_DMSO_60min	0.0256157	0.0664667	15.932	0.705044	0.988501	NA
ATP7B_HUMAN	P35670	Copper-transporting ATPase 2	ATP7B	G-6599_DMSO_30min	0.115508	0.0664667	15.932	0.101526	0.794685	NA
ATP9A_HUMAN	O75110	Probable phospholipid-transporting ATPase IIA	ATP9A	G-6599_DMSO_30min	-0.0131047	0.110782	15.932	0.907314	0.98622	NA
ATP9A_HUMAN	O75110	Probable phospholipid-transporting ATPase IIA	ATP9A	G-6599_DMSO_60min	-0.000416441	0.110782	15.932	0.997047	0.999755	NA
ATPA_HUMAN	P25705	ATP synthase subunit alpha, mitochondrial	ATP5A1	G-6599_DMSO_60min	-0.196475	0.167749	15.932	0.258721	0.957205	NA
ATPA_HUMAN	P25705	ATP synthase subunit alpha, mitochondrial	ATP5A1	G-6599_DMSO_30min	-0.0164507	0.167749	15.932	0.923102	0.986838	NA
ATPB_HUMAN	P06576	ATP synthase subunit beta, mitochondrial	ATP5B	G-6599_DMSO_60min	-0.285103	0.144071	15.932	0.0653788	0.907189	NA
ATPB_HUMAN	P06576	ATP synthase subunit beta, mitochondrial	ATP5B	G-6599_DMSO_30min	-0.162835	0.144071	15.932	0.275103	0.870404	NA
ATPD_HUMAN	P30049	ATP synthase subunit delta, mitochondrial	ATP5D	G-6599_DMSO_60min	-0.281141	0.177525	15.932	0.132915	0.934825	NA
ATPD_HUMAN	P30049	ATP synthase subunit delta, mitochondrial	ATP5D	G-6599_DMSO_30min	-0.180861	0.177525	15.932	0.323524	0.879613	NA
ATPF1_HUMAN	Q5TC12	ATP synthase mitochondrial F1 complex assembly factor 1	ATPAF1	G-6599_DMSO_60min	-0.119513	0.329582	15.932	0.721654	0.989908	NA
ATPF1_HUMAN	Q5TC12	ATP synthase mitochondrial F1 complex assembly factor 1	ATPAF1	G-6599_DMSO_30min	-0.190141	0.329582	15.932	0.57206	0.936645	NA
ATPF2_HUMAN	Q8N5M1	ATP synthase mitochondrial F1 complex assembly factor 2	ATPAF2	G-6599_DMSO_30min	-0.087914	0.146363	15.932	0.556517	0.932566	NA
ATPF2_HUMAN	Q8N5M1	ATP synthase mitochondrial F1 complex assembly factor 2	ATPAF2	G-6599_DMSO_60min	-0.0948415	0.146363	15.932	0.526221	0.983099	NA
ATPG_HUMAN	P36542	ATP synthase subunit gamma, mitochondrial	ATP5C1	G-6599_DMSO_60min	-0.271413	0.188079	15.932	0.168371	0.948862	NA
ATPG_HUMAN	P36542	ATP synthase subunit gamma, mitochondrial	ATP5C1	G-6599_DMSO_30min	-0.179947	0.188079	15.932	0.35298	0.891233	NA
ATPK_HUMAN	P56134	ATP synthase subunit f, mitochondrial	ATP5J2	G-6599_DMSO_30min	-0.175731	0.200338	15.932	0.393427	0.899572	NA
ATPK_HUMAN	P56134	ATP synthase subunit f, mitochondrial	ATP5J2	G-6599_DMSO_60min	-0.307749	0.200338	15.932	0.144122	0.935452	NA
ATPMK_HUMAN	Q96IX5	NA	NA	G-6599_DMSO_60min	-0.452967	0.219176	15.932	0.0554162	0.907189	NA
ATPMK_HUMAN	Q96IX5	NA	NA	G-6599_DMSO_30min	-0.248023	0.219176	15.932	0.274543	0.870404	NA
ATPO_HUMAN	P48047	ATP synthase subunit O, mitochondrial	ATP5O	G-6599_DMSO_30min	-0.00249738	0.155745	15.932	0.987406	0.998045	NA
ATPO_HUMAN	P48047	ATP synthase subunit O, mitochondrial	ATP5O	G-6599_DMSO_60min	-0.242034	0.155745	15.932	0.139814	0.934825	NA
ATR_HUMAN	Q13535	Serine/threonine-protein kinase ATR	ATR	G-6599_DMSO_30min	-0.120799	0.116645	15.932	0.315847	0.87744	NA
ATR_HUMAN	Q13535	Serine/threonine-protein kinase ATR	ATR	G-6599_DMSO_60min	-0.209578	0.116645	15.932	0.0913632	0.931487	NA
ATRAP_HUMAN	Q6RW13	Type-1 angiotensin II receptor-associated protein	AGTRAP	G-6599_DMSO_30min	-0.143674	0.142566	15.932	0.328623	0.883812	NA
ATRAP_HUMAN	Q6RW13	Type-1 angiotensin II receptor-associated protein	AGTRAP	G-6599_DMSO_60min	0.295436	0.142566	15.932	0.0548304	0.907189	NA
ATRIP_HUMAN	Q8WXE1	ATR-interacting protein	ATRIP	G-6599_DMSO_30min	-0.023502	0.117492	15.932	0.843987	0.973967	NA
ATRIP_HUMAN	Q8WXE1	ATR-interacting protein	ATRIP	G-6599_DMSO_60min	0.090686	0.117492	15.932	0.451502	0.982449	NA
ATRN_HUMAN	O75882	Attractin	ATRN	G-6599_DMSO_30min	0.127906	0.0750238	15.932	0.107636	0.802807	NA
ATRN_HUMAN	O75882	Attractin	ATRN	G-6599_DMSO_60min	0.0584295	0.0750238	15.932	0.447504	0.982136	NA
ATRX_HUMAN	P46100	Transcriptional regulator ATRX	ATRX	G-6599_DMSO_60min	0.0690168	0.0582923	15.932	0.253786	0.957205	NA
ATRX_HUMAN	P46100	Transcriptional regulator ATRX	ATRX	G-6599_DMSO_30min	0.075541	0.0582923	15.932	0.21347	0.851478	NA
ATRX_HUMAN	P46100-6	Transcriptional regulator ATRX (isoform 6)	ATRX	G-6599_DMSO_60min	0.0837097	0.124934	15.932	0.512435	0.983099	NA
ATRX_HUMAN	P46100-6	Transcriptional regulator ATRX (isoform 6)	ATRX	G-6599_DMSO_30min	0.148637	0.124934	15.932	0.251586	0.870404	NA
ATS15_HUMAN	Q8TE58	A disintegrin and metalloproteinase with thrombospondin motifs 15	ADAMTS15	G-6599_DMSO_30min	0.192175	0.163191	15.932	0.256245	0.870404	NA
ATS15_HUMAN	Q8TE58	A disintegrin and metalloproteinase with thrombospondin motifs 15	ADAMTS15	G-6599_DMSO_60min	0.116202	0.163191	15.932	0.486723	0.983099	NA
ATX10_HUMAN	Q9UBB4	Ataxin-10	ATXN10	G-6599_DMSO_60min	0.0595112	0.0922764	15.932	0.528155	0.983099	NA
ATX10_HUMAN	Q9UBB4	Ataxin-10	ATXN10	G-6599_DMSO_30min	-0.10541	0.0922764	15.932	0.270193	0.870404	NA
ATX1L_HUMAN	P0C7T5	Ataxin-1-like	ATXN1L	G-6599_DMSO_30min	0.0753189	0.102215	15.932	0.471914	0.917018	NA
ATX1L_HUMAN	P0C7T5	Ataxin-1-like	ATXN1L	G-6599_DMSO_60min	-0.171061	0.102215	15.932	0.113735	0.934825	NA
ATX2_HUMAN	Q99700	Ataxin-2	ATXN2	G-6599_DMSO_30min	-0.00328741	0.0670341	15.932	0.961496	0.99348	NA
ATX2_HUMAN	Q99700	Ataxin-2	ATXN2	G-6599_DMSO_60min	0.111458	0.0670341	15.932	0.115917	0.934825	NA
ATX2L_HUMAN	Q8WWM7	Ataxin-2-like protein	ATXN2L	G-6599_DMSO_30min	0.0185796	0.0599855	15.932	0.760776	0.958559	NA
ATX2L_HUMAN	Q8WWM7	Ataxin-2-like protein	ATXN2L	G-6599_DMSO_60min	0.135708	0.0599855	15.932	0.038011	0.907189	NA
ATX3_HUMAN	P54252	Ataxin-3	ATXN3	G-6599_DMSO_30min	-0.0229421	0.0924989	15.932	0.807283	0.96902	NA
ATX3_HUMAN	P54252	Ataxin-3	ATXN3	G-6599_DMSO_60min	0.0458293	0.0924989	15.932	0.627042	0.986136	NA
ATX3L_HUMAN	Q9H3M9	Putative ataxin-3-like protein	ATXN3L	G-6599_DMSO_30min	-0.0904644	0.0623881	15.932	0.166452	0.833529	NA
ATX3L_HUMAN	Q9H3M9	Putative ataxin-3-like protein	ATXN3L	G-6599_DMSO_60min	0.0239256	0.0623881	15.932	0.706421	0.988501	NA
ATX7_HUMAN	O15265	Ataxin-7	ATXN7	G-6599_DMSO_60min	0.0799945	0.0631461	15.932	0.223428	0.957205	NA
ATX7_HUMAN	O15265	Ataxin-7	ATXN7	G-6599_DMSO_30min	0.00763896	0.0631461	15.932	0.905225	0.98622	NA
AUHM_HUMAN	Q13825	Methylglutaconyl-CoA hydratase, mitochondrial	AUH	G-6599_DMSO_30min	0.022106	0.136547	15.932	0.873426	0.979746	NA
AUHM_HUMAN	Q13825	Methylglutaconyl-CoA hydratase, mitochondrial	AUH	G-6599_DMSO_60min	-0.151381	0.136547	15.932	0.284045	0.966033	NA
AUP1_HUMAN	Q9Y679	Ancient ubiquitous protein 1	AUP1	G-6599_DMSO_60min	-0.170472	0.133425	15.932	0.219673	0.957205	NA
AUP1_HUMAN	Q9Y679	Ancient ubiquitous protein 1	AUP1	G-6599_DMSO_30min	0.171628	0.133425	15.932	0.216709	0.8539	NA
AURKA_HUMAN	O14965	Aurora kinase A	AURKA	G-6599_DMSO_30min	0.0478711	0.0814922	15.932	0.565147	0.935491	NA
AURKA_HUMAN	O14965	Aurora kinase A	AURKA	G-6599_DMSO_60min	-0.0978681	0.0814922	15.932	0.247321	0.957205	NA
AURKB_HUMAN	Q96GD4	Aurora kinase B	AURKB	G-6599_DMSO_60min	-0.0510785	0.116658	15.932	0.667376	0.986327	NA
AURKB_HUMAN	Q96GD4	Aurora kinase B	AURKB	G-6599_DMSO_30min	-0.179699	0.116658	15.932	0.143092	0.826108	NA
AUXI_HUMAN	O75061	Putative tyrosine-protein phosphatase auxilin	DNAJC6	G-6599_DMSO_30min	0.0834822	0.0825945	15.932	0.327243	0.882241	NA
AUXI_HUMAN	O75061	Putative tyrosine-protein phosphatase auxilin	DNAJC6	G-6599_DMSO_60min	-0.0965107	0.0825945	15.932	0.259798	0.957205	NA
AVEN_HUMAN	Q9NQS1	Cell death regulator Aven	AVEN	G-6599_DMSO_30min	-0.0635516	0.0892733	15.932	0.486835	0.919405	NA
AVEN_HUMAN	Q9NQS1	Cell death regulator Aven	AVEN	G-6599_DMSO_60min	0.0369804	0.0892733	15.932	0.684223	0.987123	NA
AVL9_HUMAN	Q8NBF6	Late secretory pathway protein AVL9 homolog	AVL9	G-6599_DMSO_60min	0.034431	0.0779233	15.932	0.664531	0.986136	NA
AVL9_HUMAN	Q8NBF6	Late secretory pathway protein AVL9 homolog	AVL9	G-6599_DMSO_30min	-0.0807451	0.0779233	15.932	0.315576	0.87744	NA
AXIN1_HUMAN	O15169	Axin-1	AXIN1	G-6599_DMSO_30min	-0.0428233	0.0664761	15.932	0.528618	0.927126	NA
AXIN1_HUMAN	O15169	Axin-1	AXIN1	G-6599_DMSO_60min	0.0109276	0.0664761	15.932	0.871497	0.996127	NA
AXIN2_HUMAN	Q9Y2T1	Axin-2	AXIN2	G-6599_DMSO_30min	0.117382	0.0812398	15.932	0.167873	0.833529	NA
AXIN2_HUMAN	Q9Y2T1	Axin-2	AXIN2	G-6599_DMSO_60min	0.0416321	0.0812398	15.932	0.615361	0.986136	NA
AZI2_HUMAN	Q9H6S1	5-azacytidine-induced protein 2	AZI2	G-6599_DMSO_30min	-0.0210662	0.0669652	15.932	0.75716	0.958559	NA
AZI2_HUMAN	Q9H6S1	5-azacytidine-induced protein 2	AZI2	G-6599_DMSO_60min	-0.0166525	0.0669652	15.932	0.80679	0.994708	NA
AZIN1_HUMAN	O14977	Antizyme inhibitor 1	AZIN1	G-6599_DMSO_60min	0.217846	0.130831	15.932	0.115434	0.934825	NA
AZIN1_HUMAN	O14977	Antizyme inhibitor 1	AZIN1	G-6599_DMSO_30min	0.255525	0.130831	15.932	0.0686033	0.743939	NA
B2CL1_HUMAN	Q07817	Bcl-2-like protein 1	BCL2L1	G-6599_DMSO_30min	0.111839	0.082264	15.932	0.192915	0.842726	NA
B2CL1_HUMAN	Q07817	Bcl-2-like protein 1	BCL2L1	G-6599_DMSO_60min	-0.0554057	0.082264	15.932	0.510276	0.983099	NA
B2CL2_HUMAN	Q92843	Bcl-2-like protein 2	BCL2L2	G-6599_DMSO_30min	-0.00685182	0.0793028	15.932	0.932224	0.989825	NA
B2CL2_HUMAN	Q92843	Bcl-2-like protein 2	BCL2L2	G-6599_DMSO_60min	0.089435	0.0793028	15.932	0.276117	0.961247	NA
B2L12_HUMAN	Q9HB09	Bcl-2-like protein 12	BCL2L12	G-6599_DMSO_30min	-0.0741035	0.0936867	15.932	0.440577	0.909483	NA
B2L12_HUMAN	Q9HB09	Bcl-2-like protein 12	BCL2L12	G-6599_DMSO_60min	0.173933	0.0936867	15.932	0.0819663	0.914593	NA
B2L12_HUMAN	Q9HB09-2	Bcl-2-like protein 12 (isoform 2)	BCL2L12	G-6599_DMSO_30min	0.0891424	0.0799009	15.932	0.281112	0.870404	NA
B2L12_HUMAN	Q9HB09-2	Bcl-2-like protein 12 (isoform 2)	BCL2L12	G-6599_DMSO_60min	0.0361586	0.0799009	15.932	0.65698	0.986136	NA
B2L13_HUMAN	Q9BXK5	Bcl-2-like protein 13	BCL2L13	G-6599_DMSO_60min	-0.154835	0.136974	15.932	0.275041	0.960908	NA
B2L13_HUMAN	Q9BXK5	Bcl-2-like protein 13	BCL2L13	G-6599_DMSO_30min	0.0162176	0.136974	15.932	0.907231	0.98622	NA
B2L15_HUMAN	Q5TBC7	Bcl-2-like protein 15	BCL2L15	G-6599_DMSO_30min	-0.159612	0.107182	15.932	0.155973	0.833394	NA
B2L15_HUMAN	Q5TBC7	Bcl-2-like protein 15	BCL2L15	G-6599_DMSO_60min	0.0198527	0.107182	15.932	0.855391	0.994708	NA
B2MG_HUMAN	P61769	Beta-2-microglobulin	B2M	G-6599_DMSO_30min	0.170517	0.34444	15.932	0.627319	0.944526	NA
B2MG_HUMAN	P61769	Beta-2-microglobulin	B2M	G-6599_DMSO_60min	0.0193855	0.34444	15.932	0.955818	0.997441	NA
B2RB17_HUMAN	B2RB17	cDNA, FLJ95258, highly similar to Homo sapiens F-box protein 5 (FBXO5), mRNA		G-6599_DMSO_30min	-0.186998	0.0940678	15.932	0.0642879	0.743939	NA
B2RB17_HUMAN	B2RB17	cDNA, FLJ95258, highly similar to Homo sapiens F-box protein 5 (FBXO5), mRNA		G-6599_DMSO_60min	-0.252332	0.0940678	15.932	0.0163935	0.839574	NA
B2RC06_HUMAN	B2RC06	cDNA, FLJ95791, highly similar to Homo sapiens aurora kinase B (AURKB), mRNA		G-6599_DMSO_30min	0.0631135	0.243399	15.932	0.798724	0.968386	NA
B2RC06_HUMAN	B2RC06	cDNA, FLJ95791, highly similar to Homo sapiens aurora kinase B (AURKB), mRNA		G-6599_DMSO_60min	-0.078708	0.243399	15.932	0.750621	0.994708	NA
B3A2_HUMAN	P04920	Anion exchange protein 2	SLC4A2	G-6599_DMSO_30min	0.227734	0.0756324	15.932	0.00831685	0.505708	NA
B3A2_HUMAN	P04920	Anion exchange protein 2	SLC4A2	G-6599_DMSO_60min	0.0504487	0.0756324	15.932	0.514302	0.983099	NA
B3GA3_HUMAN	O94766	Galactosylgalactosylxylosylprotein 3-beta-glucuronosyltransferase 3	B3GAT3	G-6599_DMSO_60min	-0.30364	0.183153	15.932	0.116904	0.934825	NA
B3GA3_HUMAN	O94766	Galactosylgalactosylxylosylprotein 3-beta-glucuronosyltransferase 3	B3GAT3	G-6599_DMSO_30min	-0.0861268	0.183153	15.932	0.644553	0.944684	NA
B3GL2_HUMAN	Q8NCR0	UDP-GalNAc:beta-1,3-N-acetylgalactosaminyltransferase 2	B3GALNT2	G-6599_DMSO_30min	0.0192766	0.116364	15.932	0.87051	0.979158	NA
B3GL2_HUMAN	Q8NCR0	UDP-GalNAc:beta-1,3-N-acetylgalactosaminyltransferase 2	B3GALNT2	G-6599_DMSO_60min	0.0400712	0.116364	15.932	0.735078	0.992955	NA
B3GLT_HUMAN	Q6Y288	Beta-1,3-glucosyltransferase	B3GALTL	G-6599_DMSO_30min	-0.0180069	0.0641244	15.932	0.782469	0.964475	NA
B3GLT_HUMAN	Q6Y288	Beta-1,3-glucosyltransferase	B3GALTL	G-6599_DMSO_60min	0.0114125	0.0641244	15.932	0.860987	0.996127	NA
B3GT6_HUMAN	Q96L58	Beta-1,3-galactosyltransferase 6	B3GALT6	G-6599_DMSO_60min	-0.17939	0.178042	15.932	0.328718	0.973968	NA
B3GT6_HUMAN	Q96L58	Beta-1,3-galactosyltransferase 6	B3GALT6	G-6599_DMSO_30min	0.185741	0.178042	15.932	0.312407	0.87702	NA
B3KUP2_HUMAN	B3KUP2	RAN binding protein 1, isoform CRA_f	RANBP1	G-6599_DMSO_60min	0.327261	0.214363	15.932	0.146451	0.935452	NA
B3KUP2_HUMAN	B3KUP2	RAN binding protein 1, isoform CRA_f	RANBP1	G-6599_DMSO_30min	0.161365	0.214363	15.932	0.46257	0.913546	NA
B3LEU8_HUMAN	B3LEU8	TMEM214 protein	TMEM214	G-6599_DMSO_30min	0.0890703	0.193053	15.932	0.650765	0.945258	NA
B3LEU8_HUMAN	B3LEU8	TMEM214 protein	TMEM214	G-6599_DMSO_60min	-0.0664239	0.193053	15.932	0.735293	0.993094	NA
B4DQY2_HUMAN	B4DQY2	cDNA FLJ59388, highly similar to Mitochondrial inner membrane protein		G-6599_DMSO_60min	-0.293705	0.25839	15.932	0.272482	0.960319	NA
B4DQY2_HUMAN	B4DQY2	cDNA FLJ59388, highly similar to Mitochondrial inner membrane protein		G-6599_DMSO_30min	-0.0270188	0.25839	15.932	0.918025	0.98623	NA
B4DRK1_HUMAN	B4DRK1	cDNA FLJ50841, highly similar to Zinc finger protein GLI3		G-6599_DMSO_30min	0.3509	0.267335	13.932	0.210536	0.850439	NA
B4DRK1_HUMAN	B4DRK1	cDNA FLJ50841, highly similar to Zinc finger protein GLI3		G-6599_DMSO_60min	-1.21406	0.29889	13.932	0.00117679	0.274378	NA
B4E1R7_HUMAN	B4E1R7	cDNA FLJ58224, highly similar to Calpain-2 catalytic subunit (EC 3.4.22.53)		G-6599_DMSO_30min	0.175654	0.0770724	15.932	0.0367873	0.705408	NA
B4E1R7_HUMAN	B4E1R7	cDNA FLJ58224, highly similar to Calpain-2 catalytic subunit (EC 3.4.22.53)		G-6599_DMSO_60min	-0.0075975	0.0770724	15.932	0.922704	0.996995	NA
B4E2N5_HUMAN	B4E2N5	cDNA FLJ56645, highly similar to InaD-like protein		G-6599_DMSO_30min	0.0758015	0.0665412	15.932	0.271473	0.870404	NA
B4E2N5_HUMAN	B4E2N5	cDNA FLJ56645, highly similar to InaD-like protein		G-6599_DMSO_60min	0.0496892	0.0665412	15.932	0.466096	0.982773	NA
B4GN1_HUMAN	Q00973	Beta-1,4 N-acetylgalactosaminyltransferase 1	B4GALNT1	G-6599_DMSO_30min	0.0165252	0.105146	15.932	0.877089	0.981123	NA
B4GN1_HUMAN	Q00973	Beta-1,4 N-acetylgalactosaminyltransferase 1	B4GALNT1	G-6599_DMSO_60min	-0.0551725	0.105146	15.932	0.607	0.986136	NA
B4GT1_HUMAN	P15291	Beta-1,4-galactosyltransferase 1	B4GALT1	G-6599_DMSO_60min	-0.139113	0.110292	15.932	0.225349	0.957205	NA
B4GT1_HUMAN	P15291	Beta-1,4-galactosyltransferase 1	B4GALT1	G-6599_DMSO_30min	-0.275049	0.110292	15.932	0.0240229	0.643982	NA
B4GT2_HUMAN	O60909	Beta-1,4-galactosyltransferase 2	B4GALT2	G-6599_DMSO_60min	-0.0707763	0.143933	15.932	0.629617	0.986136	NA
B4GT2_HUMAN	O60909	Beta-1,4-galactosyltransferase 2	B4GALT2	G-6599_DMSO_30min	-0.153953	0.143933	15.932	0.300732	0.872304	NA
B4GT3_HUMAN	O60512	Beta-1,4-galactosyltransferase 3	B4GALT3	G-6599_DMSO_60min	-0.209575	0.155109	15.932	0.195526	0.957205	NA
B4GT3_HUMAN	O60512	Beta-1,4-galactosyltransferase 3	B4GALT3	G-6599_DMSO_30min	0.106362	0.155109	15.932	0.502747	0.920487	NA
B4GT5_HUMAN	O43286	Beta-1,4-galactosyltransferase 5	B4GALT5	G-6599_DMSO_60min	0.0387339	0.131734	15.932	0.77253	0.994708	NA
B4GT5_HUMAN	O43286	Beta-1,4-galactosyltransferase 5	B4GALT5	G-6599_DMSO_30min	-0.00716802	0.131734	15.932	0.957283	0.992761	NA
B4GT7_HUMAN	Q9UBV7	Beta-1,4-galactosyltransferase 7	B4GALT7	G-6599_DMSO_60min	-0.0480429	0.186599	15.932	0.800115	0.994708	NA
B4GT7_HUMAN	Q9UBV7	Beta-1,4-galactosyltransferase 7	B4GALT7	G-6599_DMSO_30min	0.0201554	0.186599	15.932	0.915333	0.98623	NA
BABA1_HUMAN	Q9NWV8	BRISC and BRCA1-A complex member 1	BABAM1	G-6599_DMSO_60min	0.00157613	0.0749756	15.932	0.983489	0.99975	NA
BABA1_HUMAN	Q9NWV8	BRISC and BRCA1-A complex member 1	BABAM1	G-6599_DMSO_30min	-0.0476413	0.0749756	15.932	0.534173	0.927826	NA
BABA2_HUMAN	Q9NXR7	NA	NA	G-6599_DMSO_30min	0.00255713	0.0623985	15.932	0.967821	0.99348	NA
BABA2_HUMAN	Q9NXR7	NA	NA	G-6599_DMSO_60min	0.0264378	0.0623985	15.932	0.677455	0.987123	NA
BACD1_HUMAN	Q8WZ19	BTB/POZ domain-containing adapter for CUL3-mediated RhoA degradation protein 1	KCTD13	G-6599_DMSO_60min	0.219417	0.180781	15.932	0.242543	0.957205	NA
BACD1_HUMAN	Q8WZ19	BTB/POZ domain-containing adapter for CUL3-mediated RhoA degradation protein 1	KCTD13	G-6599_DMSO_30min	0.0291235	0.180781	15.932	0.874041	0.980019	NA
BACD3_HUMAN	Q9H3F6	BTB/POZ domain-containing adapter for CUL3-mediated RhoA degradation protein 3	KCTD10	G-6599_DMSO_30min	0.125002	0.0578097	15.932	0.046156	0.73288	NA
BACD3_HUMAN	Q9H3F6	BTB/POZ domain-containing adapter for CUL3-mediated RhoA degradation protein 3	KCTD10	G-6599_DMSO_60min	0.0700524	0.0578097	15.932	0.243264	0.957205	NA
BACE2_HUMAN	Q9Y5Z0	Beta-secretase 2	BACE2	G-6599_DMSO_30min	-0.00391082	0.0908637	15.932	0.966204	0.99348	NA
BACE2_HUMAN	Q9Y5Z0	Beta-secretase 2	BACE2	G-6599_DMSO_60min	-0.137308	0.0908637	15.932	0.150332	0.935452	NA
BACH_HUMAN	O00154	Cytosolic acyl coenzyme A thioester hydrolase	ACOT7	G-6599_DMSO_60min	-0.00276387	0.085173	15.932	0.974516	0.999672	NA
BACH_HUMAN	O00154	Cytosolic acyl coenzyme A thioester hydrolase	ACOT7	G-6599_DMSO_30min	-0.122145	0.085173	15.932	0.170886	0.833636	NA
BACH1_HUMAN	O14867	Transcription regulator protein BACH1	BACH1	G-6599_DMSO_30min	-0.0945598	0.0844727	15.932	0.279557	0.870404	NA
BACH1_HUMAN	O14867	Transcription regulator protein BACH1	BACH1	G-6599_DMSO_60min	0.149471	0.0844727	15.932	0.0959515	0.934825	NA
BAD_HUMAN	Q92934	Bcl2-associated agonist of cell death	BAD	G-6599_DMSO_60min	0.00248187	0.0803056	15.932	0.975729	0.999672	NA
BAD_HUMAN	Q92934	Bcl2-associated agonist of cell death	BAD	G-6599_DMSO_30min	0.118865	0.0803056	15.932	0.158334	0.833394	NA
BAF_HUMAN	O75531	Barrier-to-autointegration factor	BANF1	G-6599_DMSO_60min	0.067516	0.240495	15.932	0.782525	0.994708	NA
BAF_HUMAN	O75531	Barrier-to-autointegration factor	BANF1	G-6599_DMSO_30min	-0.273884	0.240495	15.932	0.271607	0.870404	NA
BAG1_HUMAN	Q99933	BAG family molecular chaperone regulator 1	BAG1	G-6599_DMSO_60min	-0.00322461	0.0938931	15.932	0.97303	0.999672	NA
BAG1_HUMAN	Q99933	BAG family molecular chaperone regulator 1	BAG1	G-6599_DMSO_30min	-0.123973	0.0938931	15.932	0.205368	0.846397	NA
BAG2_HUMAN	O95816	BAG family molecular chaperone regulator 2	BAG2	G-6599_DMSO_60min	0.0439355	0.0586517	15.932	0.46472	0.982449	NA
BAG2_HUMAN	O95816	BAG family molecular chaperone regulator 2	BAG2	G-6599_DMSO_30min	0.0420637	0.0586517	15.932	0.483648	0.918807	NA
BAG3_HUMAN	O95817	BAG family molecular chaperone regulator 3	BAG3	G-6599_DMSO_30min	-0.088961	0.0660617	15.932	0.196944	0.845072	NA
BAG3_HUMAN	O95817	BAG family molecular chaperone regulator 3	BAG3	G-6599_DMSO_60min	0.00911263	0.0660617	15.932	0.892015	0.996427	NA
BAG4_HUMAN	O95429	BAG family molecular chaperone regulator 4	BAG4	G-6599_DMSO_30min	-0.134309	0.101214	15.932	0.20322	0.845623	NA
BAG4_HUMAN	O95429	BAG family molecular chaperone regulator 4	BAG4	G-6599_DMSO_60min	0.153521	0.101214	15.932	0.148909	0.935452	NA
BAG5_HUMAN	Q9UL15	BAG family molecular chaperone regulator 5	BAG5	G-6599_DMSO_30min	-0.0291404	0.0669795	15.932	0.669352	0.949861	NA
BAG5_HUMAN	Q9UL15	BAG family molecular chaperone regulator 5	BAG5	G-6599_DMSO_60min	0.0204562	0.0669795	15.932	0.764008	0.994708	NA
BAG6_HUMAN	P46379	Large proline-rich protein BAG6	BAG6	G-6599_DMSO_30min	0.0508608	0.0558184	15.932	0.37578	0.89394	NA
BAG6_HUMAN	P46379	Large proline-rich protein BAG6	BAG6	G-6599_DMSO_60min	0.0169863	0.0558184	15.932	0.764827	0.994708	NA
BAHD1_HUMAN	Q8TBE0	Bromo adjacent homology domain-containing 1 protein	BAHD1	G-6599_DMSO_60min	0.00851762	0.0630819	15.932	0.894283	0.996427	NA
BAHD1_HUMAN	Q8TBE0	Bromo adjacent homology domain-containing 1 protein	BAHD1	G-6599_DMSO_30min	-0.0571302	0.0630819	15.932	0.378613	0.89573	NA
BAIP2_HUMAN	Q9UQB8	Brain-specific angiogenesis inhibitor 1-associated protein 2	BAIAP2	G-6599_DMSO_30min	0.00426572	0.0702865	15.932	0.952361	0.991979	NA
BAIP2_HUMAN	Q9UQB8	Brain-specific angiogenesis inhibitor 1-associated protein 2	BAIAP2	G-6599_DMSO_60min	-0.0497523	0.0702865	15.932	0.489265	0.983099	NA
BAIP2_HUMAN	Q9UQB8-5	Brain-specific angiogenesis inhibitor 1-associated protein 2 (isoform 5)	BAIAP2	G-6599_DMSO_30min	0.0817608	0.129943	15.932	0.538134	0.928565	NA
BAIP2_HUMAN	Q9UQB8-5	Brain-specific angiogenesis inhibitor 1-associated protein 2 (isoform 5)	BAIAP2	G-6599_DMSO_60min	0.205245	0.129943	15.932	0.133869	0.934825	NA
BAIP2_HUMAN	Q9UQB8-6	Brain-specific angiogenesis inhibitor 1-associated protein 2 (isoform 6)	BAIAP2	G-6599_DMSO_30min	0.0758985	0.0879668	15.932	0.401045	0.899572	NA
BAIP2_HUMAN	Q9UQB8-6	Brain-specific angiogenesis inhibitor 1-associated protein 2 (isoform 6)	BAIAP2	G-6599_DMSO_60min	0.0026028	0.0879668	15.932	0.976763	0.999672	NA
BAIP3_HUMAN	O94812	BAI1-associated protein 3	BAIAP3	G-6599_DMSO_30min	0.0698976	0.269171	15.932	0.798438	0.968386	NA
BAIP3_HUMAN	O94812	BAI1-associated protein 3	BAIAP3	G-6599_DMSO_60min	0.0510739	0.269171	15.932	0.851905	0.994708	NA
BAK_HUMAN	Q16611	Bcl-2 homologous antagonist/killer	BAK1	G-6599_DMSO_60min	-0.163347	0.132929	15.932	0.236979	0.957205	NA
BAK_HUMAN	Q16611	Bcl-2 homologous antagonist/killer	BAK1	G-6599_DMSO_30min	0.196694	0.132929	15.932	0.158458	0.833394	NA
BAKOR_HUMAN	Q6ZNE5	Beclin 1-associated autophagy-related key regulator	ATG14	G-6599_DMSO_60min	-0.046196	0.0847017	15.932	0.593035	0.986136	NA
BAKOR_HUMAN	Q6ZNE5	Beclin 1-associated autophagy-related key regulator	ATG14	G-6599_DMSO_30min	-0.0105081	0.0847017	15.932	0.90282	0.98622	NA
BANP_HUMAN	Q8N9N5	Protein BANP	BANP	G-6599_DMSO_60min	0.0588489	0.0611566	15.932	0.350295	0.973968	NA
BANP_HUMAN	Q8N9N5	Protein BANP	BANP	G-6599_DMSO_30min	-0.0412265	0.0611566	15.932	0.509902	0.920487	NA
BAP1_HUMAN	Q92560	Ubiquitin carboxyl-terminal hydrolase BAP1	BAP1	G-6599_DMSO_30min	0.0711044	0.082652	15.932	0.402391	0.900653	NA
BAP1_HUMAN	Q92560	Ubiquitin carboxyl-terminal hydrolase BAP1	BAP1	G-6599_DMSO_60min	-0.00571906	0.082652	15.932	0.945696	0.996995	NA
BAP18_HUMAN	Q8IXM2	Chromatin complexes subunit BAP18	BAP18	G-6599_DMSO_30min	-0.131937	0.0748325	15.932	0.0970512	0.790877	NA
BAP18_HUMAN	Q8IXM2	Chromatin complexes subunit BAP18	BAP18	G-6599_DMSO_60min	0.107775	0.0748325	15.932	0.169169	0.948862	NA
BAP18_HUMAN	Q8IXM2-2	Chromatin complexes subunit BAP18 (isoform 2)	BAP18	G-6599_DMSO_30min	0.0375449	0.12988	15.932	0.776253	0.963115	NA
BAP18_HUMAN	Q8IXM2-2	Chromatin complexes subunit BAP18 (isoform 2)	BAP18	G-6599_DMSO_60min	0.0575538	0.12988	15.932	0.66363	0.986136	NA
BAP29_HUMAN	Q9UHQ4	B-cell receptor-associated protein 29	BCAP29	G-6599_DMSO_30min	0.0708586	0.0654305	15.932	0.294945	0.870404	NA
BAP29_HUMAN	Q9UHQ4	B-cell receptor-associated protein 29	BCAP29	G-6599_DMSO_60min	-0.0819503	0.0654305	15.932	0.228469	0.957205	NA
BAP31_HUMAN	P51572	B-cell receptor-associated protein 31	BCAP31	G-6599_DMSO_30min	0.227318	0.0927084	15.932	0.026125	0.643982	NA
BAP31_HUMAN	P51572	B-cell receptor-associated protein 31	BCAP31	G-6599_DMSO_60min	-0.102824	0.0927084	15.932	0.283845	0.966033	NA
BARD1_HUMAN	Q99728	BRCA1-associated RING domain protein 1	BARD1	G-6599_DMSO_30min	-0.0875122	0.0745871	15.932	0.257924	0.870404	NA
BARD1_HUMAN	Q99728	BRCA1-associated RING domain protein 1	BARD1	G-6599_DMSO_60min	-0.0461948	0.0745871	15.932	0.544448	0.983099	NA
BASI_HUMAN	P35613	Basigin	BSG	G-6599_DMSO_30min	0.125878	0.0992395	15.932	0.222868	0.857717	NA
BASI_HUMAN	P35613	Basigin	BSG	G-6599_DMSO_60min	0.00967334	0.0992395	15.932	0.923565	0.996995	NA
BASP1_HUMAN	P80723	Brain acid soluble protein 1	BASP1	G-6599_DMSO_30min	0.0545002	0.0576389	15.932	0.358502	0.891285	NA
BASP1_HUMAN	P80723	Brain acid soluble protein 1	BASP1	G-6599_DMSO_60min	-0.0277955	0.0576389	15.932	0.636198	0.986136	NA
BAX_HUMAN	Q07812	Apoptosis regulator BAX	BAX	G-6599_DMSO_30min	0.0245916	0.0598823	15.932	0.686788	0.954749	NA
BAX_HUMAN	Q07812	Apoptosis regulator BAX	BAX	G-6599_DMSO_60min	0.0453371	0.0598823	15.932	0.460039	0.982449	NA
BAZ1A_HUMAN	Q9NRL2	Bromodomain adjacent to zinc finger domain protein 1A	BAZ1A	G-6599_DMSO_30min	-0.00855001	0.0624065	15.932	0.892743	0.98513	NA
BAZ1A_HUMAN	Q9NRL2	Bromodomain adjacent to zinc finger domain protein 1A	BAZ1A	G-6599_DMSO_60min	-0.0334277	0.0624065	15.932	0.599603	0.986136	NA
BAZ1B_HUMAN	Q9UIG0	Tyrosine-protein kinase BAZ1B	BAZ1B	G-6599_DMSO_60min	0.182553	0.113688	15.932	0.127968	0.934825	NA
BAZ1B_HUMAN	Q9UIG0	Tyrosine-protein kinase BAZ1B	BAZ1B	G-6599_DMSO_30min	0.223622	0.113688	15.932	0.0668507	0.743939	NA
BAZ2A_HUMAN	Q9UIF9	Bromodomain adjacent to zinc finger domain protein 2A	BAZ2A	G-6599_DMSO_60min	0.0558562	0.0715222	15.932	0.446274	0.981626	NA
BAZ2A_HUMAN	Q9UIF9	Bromodomain adjacent to zinc finger domain protein 2A	BAZ2A	G-6599_DMSO_30min	0.00774398	0.0715222	15.932	0.91513	0.98623	NA
BAZ2B_HUMAN	Q9UIF8	Bromodomain adjacent to zinc finger domain protein 2B	BAZ2B	G-6599_DMSO_30min	0.0930441	0.0882074	15.932	0.307236	0.87542	NA
BAZ2B_HUMAN	Q9UIF8	Bromodomain adjacent to zinc finger domain protein 2B	BAZ2B	G-6599_DMSO_60min	0.13433	0.0882074	15.932	0.147387	0.935452	NA
BBC3_HUMAN	Q9BXH1	Bcl-2-binding component 3	BBC3	G-6599_DMSO_30min	0.224331	0.108505	15.932	0.0553333	0.738712	NA
BBC3_HUMAN	Q9BXH1	Bcl-2-binding component 3	BBC3	G-6599_DMSO_60min	-0.0449574	0.108505	15.932	0.684154	0.987123	NA
BBIP1_HUMAN	A8MTZ0	BBSome-interacting protein 1	BBIP1	G-6599_DMSO_30min	0.242486	0.0942163	15.932	0.0204496	0.620447	NA
BBIP1_HUMAN	A8MTZ0	BBSome-interacting protein 1	BBIP1	G-6599_DMSO_60min	0.194694	0.0942163	15.932	0.0554403	0.907189	NA
BBLN_HUMAN	Q9BUW7	NA	NA	G-6599_DMSO_30min	-0.0147858	0.0598135	15.932	0.807912	0.96902	NA
BBLN_HUMAN	Q9BUW7	NA	NA	G-6599_DMSO_60min	0.0742975	0.0598135	15.932	0.232155	0.957205	NA
BBS1_HUMAN	Q8NFJ9	Bardet-Biedl syndrome 1 protein	BBS1	G-6599_DMSO_60min	0.148592	0.0839265	15.932	0.095772	0.934825	NA
BBS1_HUMAN	Q8NFJ9	Bardet-Biedl syndrome 1 protein	BBS1	G-6599_DMSO_30min	-0.0402632	0.0839265	15.932	0.637929	0.944526	NA
BBS2_HUMAN	Q9BXC9	Bardet-Biedl syndrome 2 protein	BBS2	G-6599_DMSO_60min	0.0990784	0.122543	15.932	0.430701	0.980183	NA
BBS2_HUMAN	Q9BXC9	Bardet-Biedl syndrome 2 protein	BBS2	G-6599_DMSO_30min	0.132667	0.122543	15.932	0.295094	0.870404	NA
BBS4_HUMAN	Q96RK4	Bardet-Biedl syndrome 4 protein	BBS4	G-6599_DMSO_60min	0.244858	0.0737927	15.932	0.00437026	0.510456	NA
BBS4_HUMAN	Q96RK4	Bardet-Biedl syndrome 4 protein	BBS4	G-6599_DMSO_30min	0.147452	0.0737927	15.932	0.0630601	0.743939	NA
BBS5_HUMAN	Q8N3I7	Bardet-Biedl syndrome 5 protein	BBS5	G-6599_DMSO_60min	0.0407108	0.0872527	15.932	0.647114	0.986136	NA
BBS5_HUMAN	Q8N3I7	Bardet-Biedl syndrome 5 protein	BBS5	G-6599_DMSO_30min	0.079607	0.0872527	15.932	0.375172	0.893483	NA
BBS7_HUMAN	Q8IWZ6	Bardet-Biedl syndrome 7 protein	BBS7	G-6599_DMSO_60min	0.143474	0.0763472	15.932	0.0786317	0.907189	NA
BBS7_HUMAN	Q8IWZ6	Bardet-Biedl syndrome 7 protein	BBS7	G-6599_DMSO_30min	-0.0942717	0.0763472	15.932	0.234816	0.861357	NA
BBX_HUMAN	Q8WY36	HMG box transcription factor BBX	BBX	G-6599_DMSO_60min	0.122826	0.0762124	15.932	0.126675	0.934825	NA
BBX_HUMAN	Q8WY36	HMG box transcription factor BBX	BBX	G-6599_DMSO_30min	-0.0524301	0.0762124	15.932	0.50138	0.920487	NA
BC11A_HUMAN	Q9H165	B-cell lymphoma/leukemia 11A	BCL11A	G-6599_DMSO_30min	0.0536716	0.0893304	15.932	0.55641	0.932566	NA
BC11A_HUMAN	Q9H165	B-cell lymphoma/leukemia 11A	BCL11A	G-6599_DMSO_60min	-0.173604	0.0893304	15.932	0.0698506	0.907189	NA
BCAM_HUMAN	P50895	Basal cell adhesion molecule	BCAM	G-6599_DMSO_60min	-0.0306047	0.0674641	15.932	0.656203	0.986136	NA
BCAM_HUMAN	P50895	Basal cell adhesion molecule	BCAM	G-6599_DMSO_30min	0.0920027	0.0674641	15.932	0.191612	0.842726	NA
BCAR3_HUMAN	O75815	Breast cancer anti-estrogen resistance protein 3	BCAR3	G-6599_DMSO_60min	0.00703633	0.0891168	15.932	0.938051	0.996995	NA
BCAR3_HUMAN	O75815	Breast cancer anti-estrogen resistance protein 3	BCAR3	G-6599_DMSO_30min	-0.0330123	0.0891168	15.932	0.715934	0.956976	NA
BCAS3_HUMAN	Q9H6U6	Breast carcinoma-amplified sequence 3	BCAS3	G-6599_DMSO_60min	0.07923	0.0850936	15.932	0.365701	0.973968	NA
BCAS3_HUMAN	Q9H6U6	Breast carcinoma-amplified sequence 3	BCAS3	G-6599_DMSO_30min	0.193676	0.0850936	15.932	0.0370068	0.70656	NA
BCAT2_HUMAN	O15382	Branched-chain-amino-acid aminotransferase, mitochondrial	BCAT2	G-6599_DMSO_30min	-0.186335	0.138583	15.932	0.197594	0.845243	NA
BCAT2_HUMAN	O15382	Branched-chain-amino-acid aminotransferase, mitochondrial	BCAT2	G-6599_DMSO_60min	-0.101224	0.138583	15.932	0.475736	0.982773	NA
BCCIP_HUMAN	Q9P287	BRCA2 and CDKN1A-interacting protein	BCCIP	G-6599_DMSO_30min	-0.048788	0.0741721	15.932	0.520079	0.923397	NA
BCCIP_HUMAN	Q9P287	BRCA2 and CDKN1A-interacting protein	BCCIP	G-6599_DMSO_60min	0.0298902	0.0741721	15.932	0.692315	0.987921	NA
BCCIP_HUMAN	Q9P287-2	BRCA2 and CDKN1A-interacting protein (isoform 2)	BCCIP	G-6599_DMSO_60min	0.0428673	0.167818	15.932	0.801652	0.994708	NA
BCCIP_HUMAN	Q9P287-2	BRCA2 and CDKN1A-interacting protein (isoform 2)	BCCIP	G-6599_DMSO_30min	0.0811944	0.167818	15.932	0.635094	0.944526	NA
BCD1_HUMAN	Q9NWK9	Box C/D snoRNA protein 1	ZNHIT6	G-6599_DMSO_60min	0.0200508	0.0702913	15.932	0.779125	0.994708	NA
BCD1_HUMAN	Q9NWK9	Box C/D snoRNA protein 1	ZNHIT6	G-6599_DMSO_30min	-0.0270262	0.0702913	15.932	0.7057	0.955538	NA
BCKD_HUMAN	O14874	[3-methyl-2-oxobutanoate dehydrogenase [lipoamide]] kinase, mitochondrial	BCKDK	G-6599_DMSO_30min	-0.111684	0.148454	15.932	0.462832	0.913546	NA
BCKD_HUMAN	O14874	[3-methyl-2-oxobutanoate dehydrogenase [lipoamide]] kinase, mitochondrial	BCKDK	G-6599_DMSO_60min	-0.187446	0.148454	15.932	0.224882	0.957205	NA
BCL10_HUMAN	O95999	B-cell lymphoma/leukemia 10	BCL10	G-6599_DMSO_30min	-0.0322108	0.0920982	15.932	0.731111	0.958549	NA
BCL10_HUMAN	O95999	B-cell lymphoma/leukemia 10	BCL10	G-6599_DMSO_60min	0.101351	0.0920982	15.932	0.287478	0.966033	NA
BCL3_HUMAN	P20749	B-cell lymphoma 3 protein	BCL3	G-6599_DMSO_60min	0.0125242	0.0697142	15.932	0.859692	0.99593	NA
BCL3_HUMAN	P20749	B-cell lymphoma 3 protein	BCL3	G-6599_DMSO_30min	-0.188314	0.0697142	15.932	0.0157761	0.58836	NA
BCL7A_HUMAN	Q4VC05	B-cell CLL/lymphoma 7 protein family member A	BCL7A	G-6599_DMSO_30min	0.0441624	0.0593902	15.932	0.467945	0.915767	NA
BCL7A_HUMAN	Q4VC05	B-cell CLL/lymphoma 7 protein family member A	BCL7A	G-6599_DMSO_60min	-0.0152069	0.0593902	15.932	0.801189	0.994708	NA
BCL7B_HUMAN	Q9BQE9	B-cell CLL/lymphoma 7 protein family member B	BCL7B	G-6599_DMSO_30min	-0.08624	0.0737346	15.932	0.259363	0.870404	NA
BCL7B_HUMAN	Q9BQE9	B-cell CLL/lymphoma 7 protein family member B	BCL7B	G-6599_DMSO_60min	0.0154179	0.0737346	15.932	0.83702	0.994708	NA
BCL7C_HUMAN	Q8WUZ0	B-cell CLL/lymphoma 7 protein family member C	BCL7C	G-6599_DMSO_30min	-0.059802	0.0608425	15.932	0.340349	0.887798	NA
BCL7C_HUMAN	Q8WUZ0	B-cell CLL/lymphoma 7 protein family member C	BCL7C	G-6599_DMSO_60min	-0.0435924	0.0608425	15.932	0.484067	0.982773	NA
BCL9L_HUMAN	Q86UU0	B-cell CLL/lymphoma 9-like protein	BCL9L	G-6599_DMSO_30min	0.0658092	0.0716307	15.932	0.371938	0.893483	NA
BCL9L_HUMAN	Q86UU0	B-cell CLL/lymphoma 9-like protein	BCL9L	G-6599_DMSO_60min	-0.0688455	0.0716307	15.932	0.350854	0.973968	NA
BCLA3_HUMAN	A2AJT9	NA	NA	G-6599_DMSO_30min	0.0567484	0.0750025	15.932	0.460321	0.913483	NA
BCLA3_HUMAN	A2AJT9	NA	NA	G-6599_DMSO_60min	0.0629603	0.0750025	15.932	0.41364	0.977137	NA
BCLF1_HUMAN	Q9NYF8	Bcl-2-associated transcription factor 1	BCLAF1	G-6599_DMSO_30min	0.0306756	0.0821681	15.932	0.713826	0.956976	NA
BCLF1_HUMAN	Q9NYF8	Bcl-2-associated transcription factor 1	BCLAF1	G-6599_DMSO_60min	-0.0817486	0.0821681	15.932	0.334659	0.973968	NA
BCOR_HUMAN	Q6W2J9	BCL-6 corepressor	BCOR	G-6599_DMSO_30min	-0.0175819	0.056583	15.932	0.760037	0.958559	NA
BCOR_HUMAN	Q6W2J9	BCL-6 corepressor	BCOR	G-6599_DMSO_60min	0.0175315	0.056583	15.932	0.7607	0.994708	NA
BCORL_HUMAN	Q5H9F3	BCL-6 corepressor-like protein 1	BCORL1	G-6599_DMSO_30min	0.0414325	0.0870486	15.932	0.640557	0.944526	NA
BCORL_HUMAN	Q5H9F3	BCL-6 corepressor-like protein 1	BCORL1	G-6599_DMSO_60min	0.0274617	0.0870486	15.932	0.756496	0.994708	NA
BCR_HUMAN	P11274	Breakpoint cluster region protein	BCR	G-6599_DMSO_30min	-0.0191955	0.0629392	15.932	0.764326	0.958627	NA
BCR_HUMAN	P11274	Breakpoint cluster region protein	BCR	G-6599_DMSO_60min	0.0725801	0.0629392	15.932	0.265846	0.957205	NA
BCS1_HUMAN	Q9Y276	Mitochondrial chaperone BCS1	BCS1L	G-6599_DMSO_60min	-0.168168	0.160367	15.932	0.309989	0.973968	NA
BCS1_HUMAN	Q9Y276	Mitochondrial chaperone BCS1	BCS1L	G-6599_DMSO_30min	-0.173982	0.160367	15.932	0.294111	0.870404	NA
BD1L1_HUMAN	Q8NFC6	Biorientation of chromosomes in cell division protein 1-like 1	BOD1L1	G-6599_DMSO_60min	0.0679054	0.130732	15.932	0.610606	0.986136	NA
BD1L1_HUMAN	Q8NFC6	Biorientation of chromosomes in cell division protein 1-like 1	BOD1L1	G-6599_DMSO_30min	-0.015526	0.130732	15.932	0.906948	0.98622	NA
BDH_HUMAN	Q02338	D-beta-hydroxybutyrate dehydrogenase, mitochondrial	BDH1	G-6599_DMSO_60min	-0.164789	0.114734	15.932	0.17027	0.948862	NA
BDH_HUMAN	Q02338	D-beta-hydroxybutyrate dehydrogenase, mitochondrial	BDH1	G-6599_DMSO_30min	-0.0600161	0.114734	15.932	0.60811	0.941094	NA
BDP1_HUMAN	A6H8Y1	Transcription factor TFIIIB component B'' homolog	BDP1	G-6599_DMSO_60min	-0.0658127	0.180053	15.932	0.719532	0.989908	NA
BDP1_HUMAN	A6H8Y1	Transcription factor TFIIIB component B'' homolog	BDP1	G-6599_DMSO_30min	0.0214182	0.180053	15.932	0.906798	0.98622	NA
BECN1_HUMAN	Q14457	Beclin-1	BECN1	G-6599_DMSO_30min	-0.0191982	0.0899885	15.932	0.833767	0.972552	NA
BECN1_HUMAN	Q14457	Beclin-1	BECN1	G-6599_DMSO_60min	-0.00871655	0.0899885	15.932	0.924043	0.996995	NA
BEND3_HUMAN	Q5T5X7	BEN domain-containing protein 3	BEND3	G-6599_DMSO_60min	-0.0808438	0.0929229	15.932	0.397214	0.973968	NA
BEND3_HUMAN	Q5T5X7	BEN domain-containing protein 3	BEND3	G-6599_DMSO_30min	-0.169051	0.0929229	15.932	0.0877163	0.780434	NA
BEND7_HUMAN	Q8N7W2	BEN domain-containing protein 7	BEND7	G-6599_DMSO_60min	0.0979771	0.107117	15.932	0.373998	0.973968	NA
BEND7_HUMAN	Q8N7W2	BEN domain-containing protein 7	BEND7	G-6599_DMSO_30min	-0.00858183	0.107117	15.932	0.937142	0.990933	NA
BET1_HUMAN	O15155	BET1 homolog	BET1	G-6599_DMSO_30min	0.0330941	0.0823867	15.932	0.693248	0.955538	NA
BET1_HUMAN	O15155	BET1 homolog	BET1	G-6599_DMSO_60min	0.00511096	0.0823867	15.932	0.951306	0.997384	NA
BET1L_HUMAN	Q9NYM9	BET1-like protein	BET1L	G-6599_DMSO_60min	0.0191205	0.0990184	15.932	0.84932	0.994708	NA
BET1L_HUMAN	Q9NYM9	BET1-like protein	BET1L	G-6599_DMSO_30min	0.116181	0.0990184	15.932	0.257907	0.870404	NA
BGAL_HUMAN	P16278	Beta-galactosidase	GLB1	G-6599_DMSO_60min	-0.0347436	0.0598865	15.932	0.569923	0.985139	NA
BGAL_HUMAN	P16278	Beta-galactosidase	GLB1	G-6599_DMSO_30min	0.0124846	0.0598865	15.932	0.837503	0.973401	NA
BGIN_HUMAN	Q6ZT62	NA	NA	G-6599_DMSO_60min	-0.216425	0.170926	15.932	0.223646	0.957205	NA
BGIN_HUMAN	Q6ZT62	NA	NA	G-6599_DMSO_30min	-0.0668056	0.170926	15.932	0.701089	0.955538	NA
BGLR_HUMAN	P08236	Beta-glucuronidase	GUSB	G-6599_DMSO_60min	-0.0377325	0.0871512	15.932	0.670852	0.987123	NA
BGLR_HUMAN	P08236	Beta-glucuronidase	GUSB	G-6599_DMSO_30min	-0.0411349	0.0871512	15.932	0.643331	0.944526	NA
BHE40_HUMAN	O14503	Class E basic helix-loop-helix protein 40	BHLHE40	G-6599_DMSO_30min	0.298795	0.08553	15.932	0.00302126	0.336547	NA
BHE40_HUMAN	O14503	Class E basic helix-loop-helix protein 40	BHLHE40	G-6599_DMSO_60min	0.504772	0.08553	15.932	2.2711e-05	0.0251525	NA
BI1_HUMAN	P55061	Bax inhibitor 1	TMBIM6	G-6599_DMSO_30min	0.0205706	0.0885872	15.932	0.819334	0.970424	NA
BI1_HUMAN	P55061	Bax inhibitor 1	TMBIM6	G-6599_DMSO_60min	-0.148393	0.0885872	15.932	0.113426	0.934825	NA
BI2L1_HUMAN	Q9UHR4	Brain-specific angiogenesis inhibitor 1-associated protein 2-like protein 1	BAIAP2L1	G-6599_DMSO_60min	0.158095	0.100804	15.932	0.136446	0.934825	NA
BI2L1_HUMAN	Q9UHR4	Brain-specific angiogenesis inhibitor 1-associated protein 2-like protein 1	BAIAP2L1	G-6599_DMSO_30min	0.00213405	0.100804	15.932	0.983373	0.997561	NA
BICC1_HUMAN	Q9H694	Protein bicaudal C homolog 1	BICC1	G-6599_DMSO_30min	-0.0149117	0.0803586	15.932	0.855128	0.975747	NA
BICC1_HUMAN	Q9H694	Protein bicaudal C homolog 1	BICC1	G-6599_DMSO_60min	0.00720759	0.0803586	15.932	0.929649	0.996995	NA
BICD1_HUMAN	Q96G01	Protein bicaudal D homolog 1	BICD1	G-6599_DMSO_30min	-0.016515	0.0714767	15.932	0.820214	0.970424	NA
BICD1_HUMAN	Q96G01	Protein bicaudal D homolog 1	BICD1	G-6599_DMSO_60min	0.0517265	0.0714767	15.932	0.479752	0.982773	NA
BICD2_HUMAN	Q8TD16	Protein bicaudal D homolog 2	BICD2	G-6599_DMSO_60min	-0.0156169	0.0798245	15.932	0.847365	0.994708	NA
BICD2_HUMAN	Q8TD16	Protein bicaudal D homolog 2	BICD2	G-6599_DMSO_30min	0.0587445	0.0798245	15.932	0.472475	0.917401	NA
BICD2_HUMAN	Q8TD16-2	Protein bicaudal D homolog 2 (isoform 2)	BICD2	G-6599_DMSO_60min	0.089748	0.0819642	15.932	0.289809	0.969058	NA
BICD2_HUMAN	Q8TD16-2	Protein bicaudal D homolog 2 (isoform 2)	BICD2	G-6599_DMSO_30min	-0.00577401	0.0819642	15.932	0.944716	0.991979	NA
BICRA_HUMAN	Q9NZM4	NA	NA	G-6599_DMSO_30min	-0.0316089	0.0621049	15.932	0.617757	0.942978	NA
BICRA_HUMAN	Q9NZM4	NA	NA	G-6599_DMSO_60min	0.0314191	0.0621049	15.932	0.619852	0.986136	NA
BICRL_HUMAN	Q6AI39	NA	NA	G-6599_DMSO_60min	0.0819465	0.071527	15.932	0.268849	0.959114	NA
BICRL_HUMAN	Q6AI39	NA	NA	G-6599_DMSO_30min	0.0253567	0.071527	15.932	0.727609	0.957689	NA
BID_HUMAN	P55957	BH3-interacting domain death agonist	BID	G-6599_DMSO_30min	0.00315312	0.0811432	15.932	0.969486	0.99348	NA
BID_HUMAN	P55957	BH3-interacting domain death agonist	BID	G-6599_DMSO_60min	0.0359793	0.0811432	15.932	0.663436	0.986136	NA
BIEA_HUMAN	P53004	Biliverdin reductase A	BLVRA	G-6599_DMSO_60min	0.0644698	0.117509	15.932	0.590861	0.986136	NA
BIEA_HUMAN	P53004	Biliverdin reductase A	BLVRA	G-6599_DMSO_30min	-0.0623384	0.117509	15.932	0.603083	0.941094	NA
BIG1_HUMAN	Q9Y6D6	Brefeldin A-inhibited guanine nucleotide-exchange protein 1	ARFGEF1	G-6599_DMSO_30min	-0.0635442	0.0584605	15.932	0.293226	0.870404	NA
BIG1_HUMAN	Q9Y6D6	Brefeldin A-inhibited guanine nucleotide-exchange protein 1	ARFGEF1	G-6599_DMSO_60min	0.0421413	0.0584605	15.932	0.481446	0.982773	NA
BIG2_HUMAN	Q9Y6D5	Brefeldin A-inhibited guanine nucleotide-exchange protein 2	ARFGEF2	G-6599_DMSO_30min	-0.0660803	0.082356	15.932	0.434143	0.908602	NA
BIG2_HUMAN	Q9Y6D5	Brefeldin A-inhibited guanine nucleotide-exchange protein 2	ARFGEF2	G-6599_DMSO_60min	0.119792	0.082356	15.932	0.165207	0.948862	NA
BIG3_HUMAN	Q5TH69	Brefeldin A-inhibited guanine nucleotide-exchange protein 3	ARFGEF3	G-6599_DMSO_60min	0.00212578	0.0964908	15.932	0.982697	0.99975	NA
BIG3_HUMAN	Q5TH69	Brefeldin A-inhibited guanine nucleotide-exchange protein 3	ARFGEF3	G-6599_DMSO_30min	0.101278	0.0964908	15.932	0.309559	0.875882	NA
BIN1_HUMAN	O00499	Myc box-dependent-interacting protein 1	BIN1	G-6599_DMSO_60min	0.0111998	0.0930622	15.932	0.905713	0.996427	NA
BIN1_HUMAN	O00499	Myc box-dependent-interacting protein 1	BIN1	G-6599_DMSO_30min	-0.0255546	0.0930622	15.932	0.787155	0.965802	NA
BIN1_HUMAN	O00499-2	Myc box-dependent-interacting protein 1 (isoform 2)	BIN1	G-6599_DMSO_60min	0.128233	0.181554	15.932	0.490199	0.983099	NA
BIN1_HUMAN	O00499-2	Myc box-dependent-interacting protein 1 (isoform 2)	BIN1	G-6599_DMSO_30min	-0.0936688	0.181554	15.932	0.61299	0.941493	NA
BIN3_HUMAN	Q9NQY0	Bridging integrator 3	BIN3	G-6599_DMSO_60min	0.00864561	0.062076	15.932	0.890979	0.996427	NA
BIN3_HUMAN	Q9NQY0	Bridging integrator 3	BIN3	G-6599_DMSO_30min	-0.0318835	0.062076	15.932	0.614567	0.941633	NA
BIP_HUMAN	P11021	NA	NA	G-6599_DMSO_30min	0.142577	0.215568	15.932	0.517806	0.922729	NA
BIP_HUMAN	P11021	NA	NA	G-6599_DMSO_60min	0.0970433	0.215568	15.932	0.658649	0.986136	NA
BIRC2_HUMAN	Q13490	Baculoviral IAP repeat-containing protein 2	BIRC2	G-6599_DMSO_30min	-0.0282901	0.0906894	15.932	0.759128	0.958559	NA
BIRC2_HUMAN	Q13490	Baculoviral IAP repeat-containing protein 2	BIRC2	G-6599_DMSO_60min	0.0906555	0.0906894	15.932	0.332433	0.973968	NA
BIRC5_HUMAN	O15392	Baculoviral IAP repeat-containing protein 5	BIRC5	G-6599_DMSO_30min	-0.070872	0.0918243	15.932	0.451517	0.910123	NA
BIRC5_HUMAN	O15392	Baculoviral IAP repeat-containing protein 5	BIRC5	G-6599_DMSO_60min	-0.000459047	0.0918243	15.932	0.996073	0.999755	NA
BIRC6_HUMAN	Q9NR09	Baculoviral IAP repeat-containing protein 6	BIRC6	G-6599_DMSO_30min	-0.000137871	0.0612682	15.932	0.998232	0.999742	NA
BIRC6_HUMAN	Q9NR09	Baculoviral IAP repeat-containing protein 6	BIRC6	G-6599_DMSO_60min	0.0831902	0.0612682	15.932	0.193447	0.957205	NA
BL1S1_HUMAN	P78537	Biogenesis of lysosome-related organelles complex 1 subunit 1	BLOC1S1	G-6599_DMSO_30min	0.0173289	0.0610795	15.932	0.780286	0.964475	NA
BL1S1_HUMAN	P78537	Biogenesis of lysosome-related organelles complex 1 subunit 1	BLOC1S1	G-6599_DMSO_60min	0.148717	0.0610795	15.932	0.0270358	0.89355	NA
BL1S2_HUMAN	Q6QNY1	Biogenesis of lysosome-related organelles complex 1 subunit 2	BLOC1S2	G-6599_DMSO_30min	0.0101703	0.104584	15.932	0.923744	0.986909	NA
BL1S2_HUMAN	Q6QNY1	Biogenesis of lysosome-related organelles complex 1 subunit 2	BLOC1S2	G-6599_DMSO_60min	-0.0549222	0.104584	15.932	0.60671	0.986136	NA
BL1S3_HUMAN	Q6QNY0	Biogenesis of lysosome-related organelles complex 1 subunit 3	BLOC1S3	G-6599_DMSO_30min	0.119545	0.143733	15.932	0.417863	0.906553	NA
BL1S3_HUMAN	Q6QNY0	Biogenesis of lysosome-related organelles complex 1 subunit 3	BLOC1S3	G-6599_DMSO_60min	0.138885	0.143733	15.932	0.348348	0.973968	NA
BL1S4_HUMAN	Q9NUP1	Biogenesis of lysosome-related organelles complex 1 subunit 4	BLOC1S4	G-6599_DMSO_30min	-0.0471965	0.0744736	15.932	0.535247	0.927849	NA
BL1S4_HUMAN	Q9NUP1	Biogenesis of lysosome-related organelles complex 1 subunit 4	BLOC1S4	G-6599_DMSO_60min	0.0398266	0.0744736	15.932	0.60019	0.986136	NA
BL1S5_HUMAN	Q8TDH9	Biogenesis of lysosome-related organelles complex 1 subunit 5	BLOC1S5	G-6599_DMSO_60min	0.0200208	0.0748241	15.932	0.792462	0.994708	NA
BL1S5_HUMAN	Q8TDH9	Biogenesis of lysosome-related organelles complex 1 subunit 5	BLOC1S5	G-6599_DMSO_30min	0.0647434	0.0748241	15.932	0.39973	0.899572	NA
BLM_HUMAN	P54132	Bloom syndrome protein	BLM	G-6599_DMSO_60min	0.00183695	0.142591	15.932	0.989881	0.99975	NA
BLM_HUMAN	P54132	Bloom syndrome protein	BLM	G-6599_DMSO_30min	0.123001	0.142591	15.932	0.401146	0.899572	NA
BLMH_HUMAN	Q13867	Bleomycin hydrolase	BLMH	G-6599_DMSO_30min	-0.138354	0.131658	15.932	0.309002	0.875687	NA
BLMH_HUMAN	Q13867	Bleomycin hydrolase	BLMH	G-6599_DMSO_60min	0.16223	0.131658	15.932	0.235747	0.957205	NA
BLT3B_HUMAN	A0JNW5	NA	NA	G-6599_DMSO_60min	-0.0304345	0.0655272	15.932	0.648606	0.986136	NA
BLT3B_HUMAN	A0JNW5	NA	NA	G-6599_DMSO_30min	-0.0377627	0.0655272	15.932	0.572471	0.936645	NA
BLTP1_HUMAN	Q2LD37	NA	NA	G-6599_DMSO_30min	0.599304	0.125634	15.932	0.000211003	0.155773	NA
BLTP1_HUMAN	Q2LD37	NA	NA	G-6599_DMSO_60min	-0.410612	0.125634	15.932	0.00485347	0.549348	NA
BLTP2_HUMAN	Q14667	NA	NA	G-6599_DMSO_60min	-0.0148992	0.091468	15.932	0.872653	0.996127	NA
BLTP2_HUMAN	Q14667	NA	NA	G-6599_DMSO_30min	0.00357182	0.091468	15.932	0.969336	0.99348	NA
BLVRB_HUMAN	P30043	Flavin reductase (NADPH)	BLVRB	G-6599_DMSO_30min	0.158496	0.122528	15.932	0.214263	0.852115	NA
BLVRB_HUMAN	P30043	Flavin reductase (NADPH)	BLVRB	G-6599_DMSO_60min	0.206636	0.122528	15.932	0.11119	0.934825	NA
BMAL1_HUMAN	O00327	Aryl hydrocarbon receptor nuclear translocator-like protein 1	ARNTL	G-6599_DMSO_60min	0.0698404	0.06937	15.932	0.329087	0.973968	NA
BMAL1_HUMAN	O00327	Aryl hydrocarbon receptor nuclear translocator-like protein 1	ARNTL	G-6599_DMSO_30min	0.00971032	0.06937	15.932	0.890431	0.984497	NA
BMAL2_HUMAN	Q8WYA1	Aryl hydrocarbon receptor nuclear translocator-like protein 2	ARNTL2	G-6599_DMSO_30min	-0.28207	0.300317	15.932	0.361631	0.891406	NA
BMAL2_HUMAN	Q8WYA1	Aryl hydrocarbon receptor nuclear translocator-like protein 2	ARNTL2	G-6599_DMSO_60min	0.27744	0.300317	15.932	0.36936	0.973968	NA
BMI1_HUMAN	P35226	Polycomb complex protein BMI-1	BMI1	G-6599_DMSO_60min	-0.064794	0.0763356	15.932	0.408563	0.975156	NA
BMI1_HUMAN	P35226	Polycomb complex protein BMI-1	BMI1	G-6599_DMSO_30min	0.0352499	0.0763356	15.932	0.650485	0.945161	NA
BMP2K_HUMAN	Q9NSY1	BMP-2-inducible protein kinase	BMP2K	G-6599_DMSO_30min	0.0684883	0.0742027	15.932	0.36978	0.893483	NA
BMP2K_HUMAN	Q9NSY1	BMP-2-inducible protein kinase	BMP2K	G-6599_DMSO_60min	0.0710863	0.0742027	15.932	0.352375	0.973968	NA
BMP7_HUMAN	P18075	Bone morphogenetic protein 7	BMP7	G-6599_DMSO_30min	0.322014	0.0983043	15.932	0.0047788	0.377395	NA
BMP7_HUMAN	P18075	Bone morphogenetic protein 7	BMP7	G-6599_DMSO_60min	0.108208	0.0983043	15.932	0.287363	0.966033	NA
BMPR2_HUMAN	Q13873	Bone morphogenetic protein receptor type-2	BMPR2	G-6599_DMSO_60min	0.0147616	0.101371	15.932	0.886048	0.996427	NA
BMPR2_HUMAN	Q13873	Bone morphogenetic protein receptor type-2	BMPR2	G-6599_DMSO_30min	0.0160474	0.101371	15.932	0.876207	0.980976	NA
BMS1_HUMAN	Q14692	Ribosome biogenesis protein BMS1 homolog	BMS1	G-6599_DMSO_60min	0.0961972	0.128123	15.932	0.463706	0.982449	NA
BMS1_HUMAN	Q14692	Ribosome biogenesis protein BMS1 homolog	BMS1	G-6599_DMSO_30min	-0.0594853	0.128123	15.932	0.648725	0.944856	NA
BNIP2_HUMAN	Q12982	BCL2/adenovirus E1B 19 kDa protein-interacting protein 2	BNIP2	G-6599_DMSO_30min	-0.0359233	0.0610169	15.932	0.564288	0.935315	NA
BNIP2_HUMAN	Q12982	BCL2/adenovirus E1B 19 kDa protein-interacting protein 2	BNIP2	G-6599_DMSO_60min	0.100699	0.0610169	15.932	0.118443	0.934825	NA
BOD1_HUMAN	Q96IK1	Biorientation of chromosomes in cell division protein 1	BOD1	G-6599_DMSO_30min	0.16848	0.0797804	15.932	0.0508528	0.73288	NA
BOD1_HUMAN	Q96IK1	Biorientation of chromosomes in cell division protein 1	BOD1	G-6599_DMSO_60min	0.0328258	0.0797804	15.932	0.686223	0.987123	NA
BOK_HUMAN	Q9UMX3	Bcl-2-related ovarian killer protein	BOK	G-6599_DMSO_30min	0.0871225	0.322121	15.932	0.790275	0.965967	NA
BOK_HUMAN	Q9UMX3	Bcl-2-related ovarian killer protein	BOK	G-6599_DMSO_60min	0.248266	0.322121	15.932	0.45215	0.982449	NA
BOLA1_HUMAN	Q9Y3E2	BolA-like protein 1	BOLA1	G-6599_DMSO_60min	0.0180505	0.0799567	15.932	0.824264	0.994708	NA
BOLA1_HUMAN	Q9Y3E2	BolA-like protein 1	BOLA1	G-6599_DMSO_30min	-0.0172449	0.0799567	15.932	0.831976	0.972552	NA
BOLA2_HUMAN	Q9H3K6	BolA-like protein 2	BOLA2	G-6599_DMSO_60min	0.0315545	0.0898722	15.932	0.73011	0.991991	NA
BOLA2_HUMAN	Q9H3K6	BolA-like protein 2	BOLA2	G-6599_DMSO_30min	-0.170779	0.0898722	15.932	0.0756538	0.755398	NA
BOLA3_HUMAN	Q53S33	BolA-like protein 3	BOLA3	G-6599_DMSO_30min	-0.191624	0.136921	15.932	0.180826	0.8357	NA
BOLA3_HUMAN	Q53S33	BolA-like protein 3	BOLA3	G-6599_DMSO_60min	-0.240507	0.136921	15.932	0.0981966	0.934825	NA
BOP1_HUMAN	Q14137	Ribosome biogenesis protein BOP1	BOP1	G-6599_DMSO_30min	0.120818	0.0917646	15.932	0.206597	0.848908	NA
BOP1_HUMAN	Q14137	Ribosome biogenesis protein BOP1	BOP1	G-6599_DMSO_60min	0.0851273	0.0917646	15.932	0.36742	0.973968	NA
BORA_HUMAN	Q6PGQ7	Protein aurora borealis	BORA	G-6599_DMSO_30min	0.197431	0.126047	15.932	0.136917	0.826024	NA
BORA_HUMAN	Q6PGQ7	Protein aurora borealis	BORA	G-6599_DMSO_60min	-0.0168469	0.126047	15.932	0.895349	0.996427	NA
BORC5_HUMAN	Q969J3	NA	NA	G-6599_DMSO_30min	0.0434441	0.0596378	15.932	0.4769	0.917401	NA
BORC5_HUMAN	Q969J3	NA	NA	G-6599_DMSO_60min	0.0016055	0.0596378	15.932	0.978857	0.99975	NA
BORC6_HUMAN	Q96GS4	NA	NA	G-6599_DMSO_30min	-0.0214966	0.0876069	15.932	0.809298	0.96902	NA
BORC6_HUMAN	Q96GS4	NA	NA	G-6599_DMSO_60min	0.151356	0.0876069	15.932	0.103376	0.934825	NA
BORC7_HUMAN	Q96B45	NA	NA	G-6599_DMSO_30min	0.0893978	0.0747105	15.932	0.248971	0.869553	NA
BORC7_HUMAN	Q96B45	NA	NA	G-6599_DMSO_60min	0.0590803	0.0747105	15.932	0.440681	0.980183	NA
BORC8_HUMAN	Q96FH0	NA	NA	G-6599_DMSO_30min	0.00975299	0.101965	15.932	0.924991	0.987527	NA
BORC8_HUMAN	Q96FH0	NA	NA	G-6599_DMSO_60min	0.132606	0.101965	15.932	0.211924	0.957205	NA
BOREA_HUMAN	Q53HL2	Borealin	CDCA8	G-6599_DMSO_60min	-0.0453088	0.0715	15.932	0.535276	0.983099	NA
BOREA_HUMAN	Q53HL2	Borealin	CDCA8	G-6599_DMSO_30min	0.049468	0.0715	15.932	0.498984	0.920487	NA
BORG2_HUMAN	Q9UKI2	Cdc42 effector protein 3	CDC42EP3	G-6599_DMSO_30min	-0.096408	0.0831852	15.932	0.263551	0.870404	NA
BORG2_HUMAN	Q9UKI2	Cdc42 effector protein 3	CDC42EP3	G-6599_DMSO_60min	-0.139556	0.0831852	15.932	0.11292	0.934825	NA
BORG4_HUMAN	Q9H3Q1	Cdc42 effector protein 4	CDC42EP4	G-6599_DMSO_30min	-0.0293608	0.0524911	15.932	0.583703	0.93774	NA
BORG4_HUMAN	Q9H3Q1	Cdc42 effector protein 4	CDC42EP4	G-6599_DMSO_60min	0.0232738	0.0524911	15.932	0.663449	0.986136	NA
BORG5_HUMAN	Q00587	Cdc42 effector protein 1	CDC42EP1	G-6599_DMSO_60min	0.070835	0.0869643	15.932	0.42735	0.980183	NA
BORG5_HUMAN	Q00587	Cdc42 effector protein 1	CDC42EP1	G-6599_DMSO_30min	0.169249	0.0869643	15.932	0.0694894	0.743939	NA
BPHL_HUMAN	Q86WA6	Valacyclovir hydrolase	BPHL	G-6599_DMSO_60min	-0.109774	0.190761	15.932	0.573025	0.985842	NA
BPHL_HUMAN	Q86WA6	Valacyclovir hydrolase	BPHL	G-6599_DMSO_30min	-0.0274834	0.190761	15.932	0.88725	0.983677	NA
BPIA3_HUMAN	Q9BQP9	BPI fold-containing family A member 3	BPIFA3	G-6599_DMSO_30min	0.0389482	0.0906783	15.932	0.673297	0.95144	NA
BPIA3_HUMAN	Q9BQP9	BPI fold-containing family A member 3	BPIFA3	G-6599_DMSO_60min	-0.154792	0.0906783	15.932	0.107224	0.934825	NA
BPL1_HUMAN	P50747	Biotin--protein ligase	HLCS	G-6599_DMSO_30min	-0.0449087	0.0646929	15.932	0.497566	0.920487	NA
BPL1_HUMAN	P50747	Biotin--protein ligase	HLCS	G-6599_DMSO_60min	-0.0214645	0.0646929	15.932	0.744372	0.994683	NA
BPNT1_HUMAN	O95861	3'(2'),5'-bisphosphate nucleotidase 1	BPNT1	G-6599_DMSO_60min	0.113809	0.0834008	15.932	0.191343	0.957205	NA
BPNT1_HUMAN	O95861	3'(2'),5'-bisphosphate nucleotidase 1	BPNT1	G-6599_DMSO_30min	0.0767975	0.0834008	15.932	0.370876	0.893483	NA
BPTF_HUMAN	Q12830	Nucleosome-remodeling factor subunit BPTF	BPTF	G-6599_DMSO_30min	0.0665771	0.0556475	15.932	0.249039	0.869553	NA
BPTF_HUMAN	Q12830	Nucleosome-remodeling factor subunit BPTF	BPTF	G-6599_DMSO_60min	0.0229575	0.0556475	15.932	0.685433	0.987123	NA
BRAP_HUMAN	Q7Z569	BRCA1-associated protein	BRAP	G-6599_DMSO_30min	0.0184772	0.0589798	15.932	0.758132	0.958559	NA
BRAP_HUMAN	Q7Z569	BRCA1-associated protein	BRAP	G-6599_DMSO_60min	0.0234126	0.0589798	15.932	0.696665	0.988501	NA
BRAT1_HUMAN	Q6PJG6	BRCA1-associated ATM activator 1	BRAT1	G-6599_DMSO_60min	0.0955547	0.0947897	15.932	0.328487	0.973968	NA
BRAT1_HUMAN	Q6PJG6	BRCA1-associated ATM activator 1	BRAT1	G-6599_DMSO_30min	-0.0605594	0.0947897	15.932	0.531978	0.92733	NA
BRCA1_HUMAN	P38398	Breast cancer type 1 susceptibility protein	BRCA1	G-6599_DMSO_30min	-0.0694329	0.0744878	15.932	0.365177	0.893483	NA
BRCA1_HUMAN	P38398	Breast cancer type 1 susceptibility protein	BRCA1	G-6599_DMSO_60min	0.0880426	0.0744878	15.932	0.254558	0.957205	NA
BRCA2_HUMAN	P51587	Breast cancer type 2 susceptibility protein	BRCA2	G-6599_DMSO_30min	-0.0951142	0.086206	15.932	0.286268	0.870404	NA
BRCA2_HUMAN	P51587	Breast cancer type 2 susceptibility protein	BRCA2	G-6599_DMSO_60min	-0.0649847	0.086206	15.932	0.461948	0.982449	NA
BRCC3_HUMAN	P46736	Lys-63-specific deubiquitinase BRCC36	BRCC3	G-6599_DMSO_30min	-0.120506	0.074018	15.932	0.123122	0.813489	NA
BRCC3_HUMAN	P46736	Lys-63-specific deubiquitinase BRCC36	BRCC3	G-6599_DMSO_60min	0.00767468	0.074018	15.932	0.918712	0.996995	NA
BRD1_HUMAN	O95696	Bromodomain-containing protein 1	BRD1	G-6599_DMSO_30min	0.0054209	0.0614274	15.932	0.930779	0.989825	NA
BRD1_HUMAN	O95696	Bromodomain-containing protein 1	BRD1	G-6599_DMSO_60min	0.00380788	0.0614274	15.932	0.951342	0.997384	NA
BRD2_HUMAN	P25440	Bromodomain-containing protein 2	BRD2	G-6599_DMSO_30min	0.0453494	0.109273	15.932	0.68367	0.954377	NA
BRD2_HUMAN	P25440	Bromodomain-containing protein 2	BRD2	G-6599_DMSO_60min	-0.146301	0.109273	15.932	0.199409	0.957205	NA
BRD3_HUMAN	Q15059	Bromodomain-containing protein 3	BRD3	G-6599_DMSO_30min	-0.00591743	0.0538798	15.932	0.913919	0.98622	NA
BRD3_HUMAN	Q15059	Bromodomain-containing protein 3	BRD3	G-6599_DMSO_60min	0.0687234	0.0538798	15.932	0.220419	0.957205	NA
BRD4_HUMAN	O60885	Bromodomain-containing protein 4	BRD4	G-6599_DMSO_30min	-0.0434805	0.0628562	15.932	0.499055	0.920487	NA
BRD4_HUMAN	O60885	Bromodomain-containing protein 4	BRD4	G-6599_DMSO_60min	0.0197117	0.0628562	15.932	0.757894	0.994708	NA
BRD7_HUMAN	Q9NPI1	Bromodomain-containing protein 7	BRD7	G-6599_DMSO_60min	0.0514209	0.0823269	15.932	0.54108	0.983099	NA
BRD7_HUMAN	Q9NPI1	Bromodomain-containing protein 7	BRD7	G-6599_DMSO_30min	0.140975	0.0823269	15.932	0.106216	0.802807	NA
BRD8_HUMAN	Q9H0E9	Bromodomain-containing protein 8	BRD8	G-6599_DMSO_60min	0.00191319	0.0670214	15.932	0.977581	0.99975	NA
BRD8_HUMAN	Q9H0E9	Bromodomain-containing protein 8	BRD8	G-6599_DMSO_30min	-0.0552901	0.0670214	15.932	0.421574	0.906929	NA
BRD9_HUMAN	Q9H8M2	Bromodomain-containing protein 9	BRD9	G-6599_DMSO_30min	0.0410832	0.057265	15.932	0.4835	0.918807	NA
BRD9_HUMAN	Q9H8M2	Bromodomain-containing protein 9	BRD9	G-6599_DMSO_60min	0.00901241	0.057265	15.932	0.876922	0.996265	NA
BRE1A_HUMAN	Q5VTR2	E3 ubiquitin-protein ligase BRE1A	RNF20	G-6599_DMSO_60min	0.0319494	0.0670132	15.932	0.640005	0.986136	NA
BRE1A_HUMAN	Q5VTR2	E3 ubiquitin-protein ligase BRE1A	RNF20	G-6599_DMSO_30min	-0.07215	0.0670132	15.932	0.297669	0.871236	NA
BRE1B_HUMAN	O75150	E3 ubiquitin-protein ligase BRE1B	RNF40	G-6599_DMSO_30min	0.0258554	0.08291	15.932	0.759199	0.958559	NA
BRE1B_HUMAN	O75150	E3 ubiquitin-protein ligase BRE1B	RNF40	G-6599_DMSO_60min	-0.0172331	0.08291	15.932	0.837977	0.994708	NA
BRI3B_HUMAN	Q8WY22	BRI3-binding protein	BRI3BP	G-6599_DMSO_30min	0.0906928	0.1194	15.932	0.458604	0.912211	NA
BRI3B_HUMAN	Q8WY22	BRI3-binding protein	BRI3BP	G-6599_DMSO_60min	-0.00518586	0.1194	15.932	0.965896	0.998903	NA
BRK1_HUMAN	Q8WUW1	Protein BRICK1	BRK1	G-6599_DMSO_60min	0.0220873	0.0623514	15.932	0.727805	0.991218	NA
BRK1_HUMAN	Q8WUW1	Protein BRICK1	BRK1	G-6599_DMSO_30min	-0.0821244	0.0623514	15.932	0.206428	0.848606	NA
BRM1L_HUMAN	Q5PSV4	Breast cancer metastasis-suppressor 1-like protein	BRMS1L	G-6599_DMSO_60min	-0.0899445	0.105604	15.932	0.406994	0.975156	NA
BRM1L_HUMAN	Q5PSV4	Breast cancer metastasis-suppressor 1-like protein	BRMS1L	G-6599_DMSO_30min	0.130541	0.105604	15.932	0.234323	0.861357	NA
BRMS1_HUMAN	Q9HCU9	Breast cancer metastasis-suppressor 1	BRMS1	G-6599_DMSO_30min	0.165252	0.0874117	15.932	0.0770221	0.755398	NA
BRMS1_HUMAN	Q9HCU9	Breast cancer metastasis-suppressor 1	BRMS1	G-6599_DMSO_60min	0.0342751	0.0874117	15.932	0.700172	0.988501	NA
BROX_HUMAN	Q5VW32	BRO1 domain-containing protein BROX	BROX	G-6599_DMSO_60min	-0.0192133	0.103543	15.932	0.855133	0.994708	NA
BROX_HUMAN	Q5VW32	BRO1 domain-containing protein BROX	BROX	G-6599_DMSO_30min	-0.050483	0.103543	15.932	0.632505	0.944526	NA
BRPF1_HUMAN	P55201	Peregrin	BRPF1	G-6599_DMSO_60min	-0.0441986	0.161996	15.932	0.788483	0.994708	NA
BRPF1_HUMAN	P55201	Peregrin	BRPF1	G-6599_DMSO_30min	-0.0882685	0.161996	15.932	0.593381	0.939563	NA
BRPF3_HUMAN	Q9ULD4	Bromodomain and PHD finger-containing protein 3	BRPF3	G-6599_DMSO_60min	0.00794403	0.101014	15.932	0.938296	0.996995	NA
BRPF3_HUMAN	Q9ULD4	Bromodomain and PHD finger-containing protein 3	BRPF3	G-6599_DMSO_30min	0.112239	0.101014	15.932	0.283005	0.870404	NA
BRSK2_HUMAN	Q8IWQ3	Serine/threonine-protein kinase BRSK2	BRSK2	G-6599_DMSO_60min	0.0531758	0.0668067	15.932	0.437752	0.980183	NA
BRSK2_HUMAN	Q8IWQ3	Serine/threonine-protein kinase BRSK2	BRSK2	G-6599_DMSO_30min	0.0431694	0.0668067	15.932	0.52736	0.926239	NA
BRSK2_HUMAN	Q8IWQ3-4	Serine/threonine-protein kinase BRSK2 (isoform 4)	BRSK2	G-6599_DMSO_60min	0.0284964	0.0705259	15.932	0.691543	0.987921	NA
BRSK2_HUMAN	Q8IWQ3-4	Serine/threonine-protein kinase BRSK2 (isoform 4)	BRSK2	G-6599_DMSO_30min	-0.120229	0.0705259	15.932	0.107659	0.802807	NA
BRWD1_HUMAN	Q9NSI6	Bromodomain and WD repeat-containing protein 1	BRWD1	G-6599_DMSO_30min	-0.081914	0.0634942	15.932	0.215427	0.853059	NA
BRWD1_HUMAN	Q9NSI6	Bromodomain and WD repeat-containing protein 1	BRWD1	G-6599_DMSO_60min	0.146934	0.0634942	15.932	0.0343411	0.907189	NA
BRWD1_HUMAN	Q9NSI6-2	Bromodomain and WD repeat-containing protein 1 (isoform 2)	BRWD1	G-6599_DMSO_60min	0.0240261	0.086153	15.932	0.783926	0.994708	NA
BRWD1_HUMAN	Q9NSI6-2	Bromodomain and WD repeat-containing protein 1 (isoform 2)	BRWD1	G-6599_DMSO_30min	0.0962266	0.086153	15.932	0.280587	0.870404	NA
BRX1_HUMAN	Q8TDN6	Ribosome biogenesis protein BRX1 homolog	BRIX1	G-6599_DMSO_60min	0.0164559	0.0822794	15.932	0.844011	0.994708	NA
BRX1_HUMAN	Q8TDN6	Ribosome biogenesis protein BRX1 homolog	BRIX1	G-6599_DMSO_30min	0.109783	0.0822794	15.932	0.200873	0.84562	NA
BSDC1_HUMAN	Q9NW68	BSD domain-containing protein 1	BSDC1	G-6599_DMSO_30min	0.316269	0.133718	15.932	0.0310489	0.67486	NA
BSDC1_HUMAN	Q9NW68	BSD domain-containing protein 1	BSDC1	G-6599_DMSO_60min	-0.0556365	0.133718	15.932	0.682907	0.987123	NA
BST2_HUMAN	Q10589	Bone marrow stromal antigen 2	BST2	G-6599_DMSO_30min	0.0599387	0.104189	15.932	0.573133	0.936645	NA
BST2_HUMAN	Q10589	Bone marrow stromal antigen 2	BST2	G-6599_DMSO_60min	0.0937185	0.104189	15.932	0.381779	0.973968	NA
BT2A1_HUMAN	Q7KYR7	Butyrophilin subfamily 2 member A1	BTN2A1	G-6599_DMSO_30min	-0.0430225	0.091144	15.932	0.643308	0.944526	NA
BT2A1_HUMAN	Q7KYR7	Butyrophilin subfamily 2 member A1	BTN2A1	G-6599_DMSO_60min	0.00902741	0.091144	15.932	0.922338	0.996995	NA
BT3L4_HUMAN	Q96K17	Transcription factor BTF3 homolog 4	BTF3L4	G-6599_DMSO_30min	-0.0934931	0.0808747	15.932	0.264713	0.870404	NA
BT3L4_HUMAN	Q96K17	Transcription factor BTF3 homolog 4	BTF3L4	G-6599_DMSO_60min	0.0511302	0.0808747	15.932	0.536215	0.983099	NA
BTAF1_HUMAN	O14981	TATA-binding protein-associated factor 172	BTAF1	G-6599_DMSO_30min	0.0348555	0.0769533	15.932	0.656697	0.947196	NA
BTAF1_HUMAN	O14981	TATA-binding protein-associated factor 172	BTAF1	G-6599_DMSO_60min	0.155559	0.0769533	15.932	0.0603608	0.907189	NA
BTBD1_HUMAN	Q9H0C5	BTB/POZ domain-containing protein 1	BTBD1	G-6599_DMSO_60min	0.0489243	0.0748662	15.932	0.522761	0.983099	NA
BTBD1_HUMAN	Q9H0C5	BTB/POZ domain-containing protein 1	BTBD1	G-6599_DMSO_30min	0.00863504	0.0748662	15.932	0.909617	0.98622	NA
BTBD2_HUMAN	Q9BX70	BTB/POZ domain-containing protein 2	BTBD2	G-6599_DMSO_30min	0.144322	0.070974	15.932	0.0590127	0.740595	NA
BTBD2_HUMAN	Q9BX70	BTB/POZ domain-containing protein 2	BTBD2	G-6599_DMSO_60min	0.0970681	0.070974	15.932	0.190404	0.957205	NA
BTBD3_HUMAN	Q9Y2F9	BTB/POZ domain-containing protein 3	BTBD3	G-6599_DMSO_60min	-0.166004	0.0626878	15.932	0.017583	0.870308	NA
BTBD3_HUMAN	Q9Y2F9	BTB/POZ domain-containing protein 3	BTBD3	G-6599_DMSO_30min	-0.0614085	0.0626878	15.932	0.341929	0.888314	NA
BTBD8_HUMAN	Q5XKL5	BTB/POZ domain-containing protein 8	BTBD8	G-6599_DMSO_60min	0.133839	0.0891961	15.932	0.15304	0.935848	NA
BTBD8_HUMAN	Q5XKL5	BTB/POZ domain-containing protein 8	BTBD8	G-6599_DMSO_30min	0.11242	0.0891961	15.932	0.225686	0.857916	NA
BTBD9_HUMAN	Q96Q07	BTB/POZ domain-containing protein 9	BTBD9	G-6599_DMSO_60min	0.198379	0.15238	15.932	0.21147	0.957205	NA
BTBD9_HUMAN	Q96Q07	BTB/POZ domain-containing protein 9	BTBD9	G-6599_DMSO_30min	0.04916	0.15238	15.932	0.751182	0.958559	NA
BTBDA_HUMAN	Q9BSF8	BTB/POZ domain-containing protein 10	BTBD10	G-6599_DMSO_60min	0.283623	0.0890515	15.932	0.00578193	0.556825	NA
BTBDA_HUMAN	Q9BSF8	BTB/POZ domain-containing protein 10	BTBD10	G-6599_DMSO_30min	-0.088192	0.0890515	15.932	0.336807	0.886709	NA
BTD_HUMAN	P43251	Biotinidase	BTD	G-6599_DMSO_30min	0.0533779	0.0650126	15.932	0.42374	0.906929	NA
BTD_HUMAN	P43251	Biotinidase	BTD	G-6599_DMSO_60min	0.04256	0.0650126	15.932	0.522037	0.983099	NA
BTF3_HUMAN	P20290	Transcription factor BTF3	BTF3	G-6599_DMSO_60min	0.0254476	0.135183	15.932	0.853061	0.994708	NA
BTF3_HUMAN	P20290	Transcription factor BTF3	BTF3	G-6599_DMSO_30min	-0.123691	0.135183	15.932	0.373838	0.893483	NA
BTF3_HUMAN	P20290-2	Transcription factor BTF3 (isoform 2)	BTF3	G-6599_DMSO_60min	-0.123408	0.0973303	15.932	0.223039	0.957205	NA
BTF3_HUMAN	P20290-2	Transcription factor BTF3 (isoform 2)	BTF3	G-6599_DMSO_30min	-0.0442172	0.0973303	15.932	0.65574	0.946911	NA
BUB1_HUMAN	O43683	Mitotic checkpoint serine/threonine-protein kinase BUB1	BUB1	G-6599_DMSO_30min	-0.042947	0.0815049	15.932	0.605505	0.941094	NA
BUB1_HUMAN	O43683	Mitotic checkpoint serine/threonine-protein kinase BUB1	BUB1	G-6599_DMSO_60min	0.150704	0.0815049	15.932	0.0830988	0.914593	NA
BUB1B_HUMAN	O60566	Mitotic checkpoint serine/threonine-protein kinase BUB1 beta	BUB1B	G-6599_DMSO_60min	-0.138837	0.130959	15.932	0.304884	0.973968	NA
BUB1B_HUMAN	O60566	Mitotic checkpoint serine/threonine-protein kinase BUB1 beta	BUB1B	G-6599_DMSO_30min	-0.0483143	0.130959	15.932	0.71704	0.956976	NA
BUB3_HUMAN	O43684	Mitotic checkpoint protein BUB3	BUB3	G-6599_DMSO_30min	0.0875061	0.0608963	15.932	0.170075	0.833529	NA
BUB3_HUMAN	O43684	Mitotic checkpoint protein BUB3	BUB3	G-6599_DMSO_60min	0.0446132	0.0608963	15.932	0.474438	0.982773	NA
BUD13_HUMAN	Q9BRD0	BUD13 homolog	BUD13	G-6599_DMSO_30min	0.0847466	0.148297	15.932	0.575658	0.936645	NA
BUD13_HUMAN	Q9BRD0	BUD13 homolog	BUD13	G-6599_DMSO_60min	-0.115878	0.148297	15.932	0.446029	0.981572	NA
BUD23_HUMAN	O43709	NA	NA	G-6599_DMSO_30min	-0.0680813	0.0875561	15.932	0.448214	0.909483	NA
BUD23_HUMAN	O43709	NA	NA	G-6599_DMSO_60min	-0.0274509	0.0875561	15.932	0.75795	0.994708	NA
BUD31_HUMAN	P41223	Protein BUD31 homolog	BUD31	G-6599_DMSO_60min	0.0877896	0.0857073	15.932	0.320997	0.973968	NA
BUD31_HUMAN	P41223	Protein BUD31 homolog	BUD31	G-6599_DMSO_30min	0.323111	0.0857073	15.932	0.00168681	0.309614	NA
BWNIN_HUMAN	Q69YU5	NA	NA	G-6599_DMSO_30min	-0.138041	0.163235	15.932	0.410267	0.903894	NA
BWNIN_HUMAN	Q69YU5	NA	NA	G-6599_DMSO_60min	-0.336421	0.163235	15.932	0.0560211	0.907189	NA
BY55_HUMAN	O95971	CD160 antigen	CD160	G-6599_DMSO_30min	0.0141072	0.0526936	15.932	0.792348	0.966636	NA
BY55_HUMAN	O95971	CD160 antigen	CD160	G-6599_DMSO_60min	0.0776412	0.0526936	15.932	0.160113	0.941362	NA
BYST_HUMAN	Q13895	Bystin	BYSL	G-6599_DMSO_30min	-0.0458402	0.107732	15.932	0.676163	0.952404	NA
BYST_HUMAN	Q13895	Bystin	BYSL	G-6599_DMSO_60min	0.106662	0.107732	15.932	0.336939	0.973968	NA
C10_HUMAN	Q99622	Protein C10	C12orf57	G-6599_DMSO_60min	0.119946	0.119606	15.932	0.330923	0.973968	NA
C10_HUMAN	Q99622	Protein C10	C12orf57	G-6599_DMSO_30min	0.0438279	0.119606	15.932	0.71886	0.957221	NA
C102A_HUMAN	Q96A19	Coiled-coil domain-containing protein 102A	CCDC102A	G-6599_DMSO_60min	0.040939	0.0942084	15.932	0.669712	0.987123	NA
C102A_HUMAN	Q96A19	Coiled-coil domain-containing protein 102A	CCDC102A	G-6599_DMSO_30min	-0.148698	0.0942084	15.932	0.134121	0.824551	NA
C170B_HUMAN	Q9Y4F5	Centrosomal protein of 170 kDa protein B	CEP170B	G-6599_DMSO_60min	0.0818892	0.0702561	15.932	0.260939	0.957205	NA
C170B_HUMAN	Q9Y4F5	Centrosomal protein of 170 kDa protein B	CEP170B	G-6599_DMSO_30min	-0.0232949	0.0702561	15.932	0.744535	0.958559	NA
C170L_HUMAN	Q96L14	Cep170-like protein	CEP170P1	G-6599_DMSO_30min	-0.0657256	0.106087	15.932	0.544317	0.929975	NA
C170L_HUMAN	Q96L14	Cep170-like protein	CEP170P1	G-6599_DMSO_60min	0.0873303	0.106087	15.932	0.422549	0.979629	NA
C19L1_HUMAN	Q69YN2	CWF19-like protein 1	CWF19L1	G-6599_DMSO_30min	-0.0952218	0.0739722	15.932	0.21639	0.853897	NA
C19L1_HUMAN	Q69YN2	CWF19-like protein 1	CWF19L1	G-6599_DMSO_60min	0.0609648	0.0739722	15.932	0.422017	0.979629	NA
C19L2_HUMAN	Q2TBE0	CWF19-like protein 2	CWF19L2	G-6599_DMSO_30min	0.0666511	0.0534969	15.932	0.230816	0.861357	NA
C19L2_HUMAN	Q2TBE0	CWF19-like protein 2	CWF19L2	G-6599_DMSO_60min	0.0300136	0.0534969	15.932	0.58258	0.986136	NA
C1D_HUMAN	Q13901	Nuclear nucleic acid-binding protein C1D	C1D	G-6599_DMSO_60min	0.0605475	0.0548107	15.932	0.285709	0.966033	NA
C1D_HUMAN	Q13901	Nuclear nucleic acid-binding protein C1D	C1D	G-6599_DMSO_30min	0.0210063	0.0548107	15.932	0.706598	0.955538	NA
C1GLC_HUMAN	Q96EU7	C1GALT1-specific chaperone 1	C1GALT1C1	G-6599_DMSO_30min	-0.265521	0.11528	15.932	0.0350827	0.702474	NA
C1GLC_HUMAN	Q96EU7	C1GALT1-specific chaperone 1	C1GALT1C1	G-6599_DMSO_60min	-0.0208533	0.11528	15.932	0.858734	0.99521	NA
C1QBP_HUMAN	Q07021	Complement component 1 Q subcomponent-binding protein, mitochondrial	C1QBP	G-6599_DMSO_30min	-0.207818	0.147525	15.932	0.178142	0.834123	NA
C1QBP_HUMAN	Q07021	Complement component 1 Q subcomponent-binding protein, mitochondrial	C1QBP	G-6599_DMSO_60min	-0.179641	0.147525	15.932	0.241066	0.957205	NA
C1QL4_HUMAN	Q86Z23	Complement C1q-like protein 4	C1QL4	G-6599_DMSO_60min	0.122329	0.358192	15.932	0.737176	0.993608	NA
C1QL4_HUMAN	Q86Z23	Complement C1q-like protein 4	C1QL4	G-6599_DMSO_30min	-0.0272664	0.358192	15.932	0.94027	0.991419	NA
C1QT3_HUMAN	Q9BXJ4	Complement C1q tumor necrosis factor-related protein 3	C1QTNF3	G-6599_DMSO_60min	-0.0330688	0.210004	15.932	0.876855	0.996265	NA
C1QT3_HUMAN	Q9BXJ4	Complement C1q tumor necrosis factor-related protein 3	C1QTNF3	G-6599_DMSO_30min	0.0309097	0.210004	15.932	0.884832	0.983677	NA
C1RL_HUMAN	Q9NZP8	Complement C1r subcomponent-like protein	C1RL	G-6599_DMSO_30min	0.0949585	0.0664356	15.932	0.172224	0.834008	NA
C1RL_HUMAN	Q9NZP8	Complement C1r subcomponent-like protein	C1RL	G-6599_DMSO_60min	0.146743	0.0664356	15.932	0.0421874	0.907189	NA
C1TC_HUMAN	P11586	C-1-tetrahydrofolate synthase, cytoplasmic	MTHFD1	G-6599_DMSO_60min	-0.00908351	0.0911067	15.932	0.921825	0.996995	NA
C1TC_HUMAN	P11586	C-1-tetrahydrofolate synthase, cytoplasmic	MTHFD1	G-6599_DMSO_30min	-0.0834933	0.0911067	15.932	0.373103	0.893483	NA
C1TM_HUMAN	Q6UB35	Monofunctional C1-tetrahydrofolate synthase, mitochondrial	MTHFD1L	G-6599_DMSO_30min	-0.134284	0.113921	15.932	0.255802	0.870404	NA
C1TM_HUMAN	Q6UB35	Monofunctional C1-tetrahydrofolate synthase, mitochondrial	MTHFD1L	G-6599_DMSO_60min	-0.303303	0.113921	15.932	0.0170779	0.864628	NA
C2AIL_HUMAN	Q96HQ2	CDKN2AIP N-terminal-like protein	CDKN2AIPNL	G-6599_DMSO_30min	0.0467161	0.0961052	15.932	0.633519	0.944526	NA
C2AIL_HUMAN	Q96HQ2	CDKN2AIP N-terminal-like protein	CDKN2AIPNL	G-6599_DMSO_60min	0.0918304	0.0961052	15.932	0.35359	0.973968	NA
C2C2L_HUMAN	O14523	C2 domain-containing protein 2-like	C2CD2L	G-6599_DMSO_30min	0.163507	0.104248	15.932	0.136425	0.826024	NA
C2C2L_HUMAN	O14523	C2 domain-containing protein 2-like	C2CD2L	G-6599_DMSO_60min	-0.0613161	0.104248	15.932	0.564661	0.985139	NA
C2C4C_HUMAN	Q8TF44	C2 calcium-dependent domain-containing protein 4C	C2CD4C	G-6599_DMSO_60min	-0.0920028	0.127275	15.932	0.48024	0.982773	NA
C2C4C_HUMAN	Q8TF44	C2 calcium-dependent domain-containing protein 4C	C2CD4C	G-6599_DMSO_30min	0.236262	0.127275	15.932	0.0819996	0.771424	NA
C2CD2_HUMAN	Q9Y426	NA	NA	G-6599_DMSO_60min	0.0488614	0.0696188	15.932	0.492904	0.983099	NA
C2CD2_HUMAN	Q9Y426	NA	NA	G-6599_DMSO_30min	0.0797393	0.0696188	15.932	0.26897	0.870404	NA
C2CD3_HUMAN	Q4AC94	C2 domain-containing protein 3	C2CD3	G-6599_DMSO_60min	-0.114106	0.103634	15.932	0.287236	0.966033	NA
C2CD3_HUMAN	Q4AC94	C2 domain-containing protein 3	C2CD3	G-6599_DMSO_30min	0.288221	0.103634	15.932	0.0133907	0.575716	NA
C2CD5_HUMAN	Q86YS7	C2 domain-containing protein 5	C2CD5	G-6599_DMSO_60min	-0.0210928	0.103166	15.932	0.840587	0.994708	NA
C2CD5_HUMAN	Q86YS7	C2 domain-containing protein 5	C2CD5	G-6599_DMSO_30min	-0.0692084	0.103166	15.932	0.511929	0.920487	NA
C2D1A_HUMAN	Q6P1N0	Coiled-coil and C2 domain-containing protein 1A	CC2D1A	G-6599_DMSO_30min	-0.000692704	0.0593447	15.932	0.990832	0.999166	NA
C2D1A_HUMAN	Q6P1N0	Coiled-coil and C2 domain-containing protein 1A	CC2D1A	G-6599_DMSO_60min	0.0287816	0.0593447	15.932	0.634284	0.986136	NA
C2D1B_HUMAN	Q5T0F9	Coiled-coil and C2 domain-containing protein 1B	CC2D1B	G-6599_DMSO_60min	0.0619807	0.0719925	15.932	0.402047	0.973968	NA
C2D1B_HUMAN	Q5T0F9	Coiled-coil and C2 domain-containing protein 1B	CC2D1B	G-6599_DMSO_30min	0.0101553	0.0719925	15.932	0.88959	0.984306	NA
C2D1B_HUMAN	Q5T0F9-2	Coiled-coil and C2 domain-containing protein 1B (isoform 2)	CC2D1B	G-6599_DMSO_30min	-0.0305755	0.0960842	15.932	0.754455	0.958559	NA
C2D1B_HUMAN	Q5T0F9-2	Coiled-coil and C2 domain-containing protein 1B (isoform 2)	CC2D1B	G-6599_DMSO_60min	-0.0470367	0.0960842	15.932	0.631134	0.986136	NA
C2D2A_HUMAN	Q9P2K1	Coiled-coil and C2 domain-containing protein 2A	CC2D2A	G-6599_DMSO_60min	-0.0535164	0.114294	15.932	0.645957	0.986136	NA
C2D2A_HUMAN	Q9P2K1	Coiled-coil and C2 domain-containing protein 2A	CC2D2A	G-6599_DMSO_30min	0.189454	0.114294	15.932	0.116954	0.809448	NA
C42S2_HUMAN	Q9NRR3	CDC42 small effector protein 2	CDC42SE2	G-6599_DMSO_30min	0.0948288	0.0669365	15.932	0.175828	0.834008	NA
C42S2_HUMAN	Q9NRR3	CDC42 small effector protein 2	CDC42SE2	G-6599_DMSO_60min	-0.0350198	0.0669365	15.932	0.608049	0.986136	NA
C560_HUMAN	Q99643	Succinate dehydrogenase cytochrome b560 subunit, mitochondrial	SDHC	G-6599_DMSO_60min	-0.325176	0.24134	15.932	0.196709	0.957205	NA
C560_HUMAN	Q99643	Succinate dehydrogenase cytochrome b560 subunit, mitochondrial	SDHC	G-6599_DMSO_30min	-0.281683	0.24134	15.932	0.260316	0.870404	NA
C8AP2_HUMAN	Q9UKL3	CASP8-associated protein 2	CASP8AP2	G-6599_DMSO_30min	0.0873016	0.0777422	15.932	0.278092	0.870404	NA
C8AP2_HUMAN	Q9UKL3	CASP8-associated protein 2	CASP8AP2	G-6599_DMSO_60min	-0.0393142	0.0777422	15.932	0.619992	0.986136	NA
C99L2_HUMAN	Q8TCZ2	CD99 antigen-like protein 2	CD99L2	G-6599_DMSO_30min	0.153675	0.096529	15.932	0.131027	0.822221	NA
C99L2_HUMAN	Q8TCZ2	CD99 antigen-like protein 2	CD99L2	G-6599_DMSO_60min	-0.00929896	0.096529	15.932	0.924457	0.996995	NA
CA021_HUMAN	Q9H246	Uncharacterized protein C1orf21	C1orf21	G-6599_DMSO_60min	0.11085	0.0863463	15.932	0.217576	0.957205	NA
CA021_HUMAN	Q9H246	Uncharacterized protein C1orf21	C1orf21	G-6599_DMSO_30min	0.0693613	0.0863463	15.932	0.433628	0.908602	NA
CA043_HUMAN	Q9BWL3	Uncharacterized protein C1orf43	C1orf43	G-6599_DMSO_60min	0.0916889	0.0970303	15.932	0.358795	0.973968	NA
CA043_HUMAN	Q9BWL3	Uncharacterized protein C1orf43	C1orf43	G-6599_DMSO_30min	0.284072	0.0970303	15.932	0.00989197	0.521795	NA
CA050_HUMAN	Q9BV19	Uncharacterized protein C1orf50	C1orf50	G-6599_DMSO_60min	0.137587	0.0633055	15.932	0.0451797	0.907189	NA
CA050_HUMAN	Q9BV19	Uncharacterized protein C1orf50	C1orf50	G-6599_DMSO_30min	-0.0209487	0.0633055	15.932	0.745021	0.958559	NA
CA052_HUMAN	Q8N6N3	UPF0690 protein C1orf52	C1orf52	G-6599_DMSO_60min	-0.0392739	0.0590211	15.932	0.515299	0.983099	NA
CA052_HUMAN	Q8N6N3	UPF0690 protein C1orf52	C1orf52	G-6599_DMSO_30min	0.0411638	0.0590211	15.932	0.495579	0.920487	NA
CA109_HUMAN	Q9NX04	Uncharacterized protein C1orf109	C1orf109	G-6599_DMSO_60min	0.37413	0.206352	15.932	0.088705	0.926022	NA
CA109_HUMAN	Q9NX04	Uncharacterized protein C1orf109	C1orf109	G-6599_DMSO_30min	0.199265	0.206352	15.932	0.348648	0.890233	NA
CA112_HUMAN	Q9NSG2	Uncharacterized protein C1orf112	C1orf112	G-6599_DMSO_30min	-0.15006	0.0817218	15.932	0.0850554	0.777841	NA
CA112_HUMAN	Q9NSG2	Uncharacterized protein C1orf112	C1orf112	G-6599_DMSO_60min	-0.0543442	0.0817218	15.932	0.515568	0.983099	NA
CA122_HUMAN	Q6ZSJ8	Uncharacterized protein C1orf122	C1orf122	G-6599_DMSO_30min	-0.122447	0.0882958	15.932	0.184608	0.837328	NA
CA122_HUMAN	Q6ZSJ8	Uncharacterized protein C1orf122	C1orf122	G-6599_DMSO_60min	0.0266008	0.0882958	15.932	0.767106	0.994708	NA
CA131_HUMAN	Q8NDD1	Uncharacterized protein C1orf131	C1orf131	G-6599_DMSO_60min	0.032233	0.107985	15.932	0.769184	0.994708	NA
CA131_HUMAN	Q8NDD1	Uncharacterized protein C1orf131	C1orf131	G-6599_DMSO_30min	0.0847248	0.107985	15.932	0.4442	0.909483	NA
CA167_HUMAN	Q5SNV9	Uncharacterized protein C1orf167	C1orf167	G-6599_DMSO_30min	-0.129387	0.114441	15.932	0.274956	0.870404	NA
CA167_HUMAN	Q5SNV9	Uncharacterized protein C1orf167	C1orf167	G-6599_DMSO_60min	-0.00408303	0.114441	15.932	0.971982	0.999672	NA
CA174_HUMAN	Q8IYL3	UPF0688 protein C1orf174	C1orf174	G-6599_DMSO_30min	-0.179775	0.102913	15.932	0.0999079	0.794283	NA
CA174_HUMAN	Q8IYL3	UPF0688 protein C1orf174	C1orf174	G-6599_DMSO_60min	-0.0163525	0.102913	15.932	0.875748	0.996265	NA
CA198_HUMAN	Q9H425	Uncharacterized protein C1orf198	C1orf198	G-6599_DMSO_60min	-0.000813049	0.0664437	15.932	0.990389	0.99975	NA
CA198_HUMAN	Q9H425	Uncharacterized protein C1orf198	C1orf198	G-6599_DMSO_30min	0.0827479	0.0664437	15.932	0.230996	0.861357	NA
CA226_HUMAN	A1L170	Uncharacterized protein C1orf226	C1orf226	G-6599_DMSO_30min	-0.088064	0.111958	15.932	0.443072	0.909483	NA
CA226_HUMAN	A1L170	Uncharacterized protein C1orf226	C1orf226	G-6599_DMSO_60min	0.119746	0.111958	15.932	0.300755	0.973968	NA
CA2D1_HUMAN	P54289	Voltage-dependent calcium channel subunit alpha-2/delta-1	CACNA2D1	G-6599_DMSO_60min	-0.123139	0.122127	15.932	0.328387	0.973968	NA
CA2D1_HUMAN	P54289	Voltage-dependent calcium channel subunit alpha-2/delta-1	CACNA2D1	G-6599_DMSO_30min	0.138135	0.122127	15.932	0.274762	0.870404	NA
CA2D3_HUMAN	Q8IZS8	Voltage-dependent calcium channel subunit alpha-2/delta-3	CACNA2D3	G-6599_DMSO_30min	0.215019	0.124817	15.932	0.104297	0.798706	NA
CA2D3_HUMAN	Q8IZS8	Voltage-dependent calcium channel subunit alpha-2/delta-3	CACNA2D3	G-6599_DMSO_60min	-0.200279	0.124817	15.932	0.128221	0.934825	NA
CAAP1_HUMAN	Q9H8G2	Caspase activity and apoptosis inhibitor 1	CAAP1	G-6599_DMSO_30min	0.030562	0.0589416	15.932	0.611226	0.941493	NA
CAAP1_HUMAN	Q9H8G2	Caspase activity and apoptosis inhibitor 1	CAAP1	G-6599_DMSO_60min	0.0124935	0.0589416	15.932	0.834823	0.994708	NA
CAB39_HUMAN	Q9Y376	Calcium-binding protein 39	CAB39	G-6599_DMSO_30min	-0.0349746	0.0780964	15.932	0.660299	0.94789	NA
CAB39_HUMAN	Q9Y376	Calcium-binding protein 39	CAB39	G-6599_DMSO_60min	0.056039	0.0780964	15.932	0.483417	0.982773	NA
CAB45_HUMAN	Q9BRK5	45 kDa calcium-binding protein	SDF4	G-6599_DMSO_60min	-0.188377	0.104561	15.932	0.0905626	0.928686	NA
CAB45_HUMAN	Q9BRK5	45 kDa calcium-binding protein	SDF4	G-6599_DMSO_30min	-0.0422192	0.104561	15.932	0.691745	0.954957	NA
CABIN_HUMAN	Q9Y6J0	Calcineurin-binding protein cabin-1	CABIN1	G-6599_DMSO_30min	0.0169727	0.100657	15.932	0.868218	0.978722	NA
CABIN_HUMAN	Q9Y6J0	Calcineurin-binding protein cabin-1	CABIN1	G-6599_DMSO_60min	-0.045825	0.100657	15.932	0.655064	0.986136	NA
CABL1_HUMAN	Q8TDN4	CDK5 and ABL1 enzyme substrate 1	CABLES1	G-6599_DMSO_30min	-0.0570357	0.0936025	15.932	0.550891	0.931185	NA
CABL1_HUMAN	Q8TDN4	CDK5 and ABL1 enzyme substrate 1	CABLES1	G-6599_DMSO_60min	0.0996967	0.0936025	15.932	0.302704	0.973968	NA
CABL2_HUMAN	Q9BTV7	CDK5 and ABL1 enzyme substrate 2	CABLES2	G-6599_DMSO_60min	-0.0294078	0.0752299	15.932	0.701045	0.988501	NA
CABL2_HUMAN	Q9BTV7	CDK5 and ABL1 enzyme substrate 2	CABLES2	G-6599_DMSO_30min	0.181236	0.0752299	15.932	0.0284577	0.66377	NA
CACB3_HUMAN	P54284	Voltage-dependent L-type calcium channel subunit beta-3	CACNB3	G-6599_DMSO_60min	0.138984	0.071993	15.932	0.0715382	0.907189	NA
CACB3_HUMAN	P54284	Voltage-dependent L-type calcium channel subunit beta-3	CACNB3	G-6599_DMSO_30min	0.0991338	0.071993	15.932	0.187557	0.840447	NA
CACL1_HUMAN	Q86Y37	CDK2-associated and cullin domain-containing protein 1	CACUL1	G-6599_DMSO_30min	-0.14861	0.0992935	15.932	0.154026	0.833394	NA
CACL1_HUMAN	Q86Y37	CDK2-associated and cullin domain-containing protein 1	CACUL1	G-6599_DMSO_60min	-0.0272119	0.0992935	15.932	0.787564	0.994708	NA
CACO1_HUMAN	Q9P1Z2	Calcium-binding and coiled-coil domain-containing protein 1	CALCOCO1	G-6599_DMSO_30min	-0.0363493	0.0962242	15.932	0.710597	0.956325	NA
CACO1_HUMAN	Q9P1Z2	Calcium-binding and coiled-coil domain-containing protein 1	CALCOCO1	G-6599_DMSO_60min	0.0516344	0.0962242	15.932	0.598954	0.986136	NA
CACO2_HUMAN	Q13137	Calcium-binding and coiled-coil domain-containing protein 2	CALCOCO2	G-6599_DMSO_60min	-0.122881	0.0817244	15.932	0.152247	0.935848	NA
CACO2_HUMAN	Q13137	Calcium-binding and coiled-coil domain-containing protein 2	CALCOCO2	G-6599_DMSO_30min	0.0936016	0.0817244	15.932	0.268985	0.870404	NA
CACP_HUMAN	P43155	Carnitine O-acetyltransferase	CRAT	G-6599_DMSO_30min	0.0321146	0.178245	15.932	0.85929	0.977697	NA
CACP_HUMAN	P43155	Carnitine O-acetyltransferase	CRAT	G-6599_DMSO_60min	-0.233408	0.178245	15.932	0.208944	0.957205	NA
CAD11_HUMAN	P55287	Cadherin-11	CDH11	G-6599_DMSO_60min	0.0692828	0.0715917	15.932	0.347632	0.973968	NA
CAD11_HUMAN	P55287	Cadherin-11	CDH11	G-6599_DMSO_30min	0.092029	0.0715917	15.932	0.217	0.8539	NA
CADM1_HUMAN	Q9BY67	Cell adhesion molecule 1	CADM1	G-6599_DMSO_60min	0.0670229	0.0955038	15.932	0.492941	0.983099	NA
CADM1_HUMAN	Q9BY67	Cell adhesion molecule 1	CADM1	G-6599_DMSO_30min	0.128749	0.0955038	15.932	0.196483	0.845072	NA
CADM4_HUMAN	Q8NFZ8	Cell adhesion molecule 4	CADM4	G-6599_DMSO_30min	0.188661	0.0863272	15.932	0.0441413	0.73288	NA
CADM4_HUMAN	Q8NFZ8	Cell adhesion molecule 4	CADM4	G-6599_DMSO_60min	0.0369163	0.0863272	15.932	0.674643	0.987123	NA
CAF17_HUMAN	Q5T440	Putative transferase CAF17, mitochondrial	IBA57	G-6599_DMSO_30min	-0.163463	0.14822	15.932	0.286478	0.870404	NA
CAF17_HUMAN	Q5T440	Putative transferase CAF17, mitochondrial	IBA57	G-6599_DMSO_60min	-0.132364	0.14822	15.932	0.385136	0.973968	NA
CAF1A_HUMAN	Q13111	Chromatin assembly factor 1 subunit A	CHAF1A	G-6599_DMSO_60min	-0.0137427	0.062753	15.932	0.829434	0.994708	NA
CAF1A_HUMAN	Q13111	Chromatin assembly factor 1 subunit A	CHAF1A	G-6599_DMSO_30min	-0.0264733	0.062753	15.932	0.678761	0.952528	NA
CAF1B_HUMAN	Q13112	Chromatin assembly factor 1 subunit B	CHAF1B	G-6599_DMSO_30min	0.0574108	0.100521	15.932	0.575878	0.936645	NA
CAF1B_HUMAN	Q13112	Chromatin assembly factor 1 subunit B	CHAF1B	G-6599_DMSO_60min	0.0730723	0.100521	15.932	0.477811	0.982773	NA
CAHD1_HUMAN	Q5VU97	VWFA and cache domain-containing protein 1	CACHD1	G-6599_DMSO_30min	0.124439	0.0691915	15.932	0.0910742	0.782504	NA
CAHD1_HUMAN	Q5VU97	VWFA and cache domain-containing protein 1	CACHD1	G-6599_DMSO_60min	-0.0151931	0.0691915	15.932	0.828987	0.994708	NA
CALB2_HUMAN	P22676	Calretinin	CALB2	G-6599_DMSO_30min	0.0561681	0.0893121	15.932	0.53833	0.928565	NA
CALB2_HUMAN	P22676	Calretinin	CALB2	G-6599_DMSO_60min	0.154528	0.0893121	15.932	0.102915	0.934825	NA
CALD1_HUMAN	Q05682	Caldesmon	CALD1	G-6599_DMSO_30min	0.105001	0.121772	15.932	0.401329	0.899572	NA
CALD1_HUMAN	Q05682	Caldesmon	CALD1	G-6599_DMSO_60min	0.0907495	0.121772	15.932	0.466979	0.982773	NA
CALM1_HUMAN	P0DP23	NA	NA	G-6599_DMSO_30min	0.113738	0.169681	15.932	0.512264	0.920487	NA
CALM1_HUMAN	P0DP23	NA	NA	G-6599_DMSO_60min	-0.256695	0.169681	15.932	0.149911	0.935452	NA
CALR_HUMAN	P27797	Calreticulin	CALR	G-6599_DMSO_60min	0.0313117	0.211874	15.932	0.884367	0.996427	NA
CALR_HUMAN	P27797	Calreticulin	CALR	G-6599_DMSO_30min	0.132336	0.211874	15.932	0.541077	0.929122	NA
CALU_HUMAN	O43852	Calumenin	CALU	G-6599_DMSO_60min	-0.0326178	0.109063	15.932	0.768751	0.994708	NA
CALU_HUMAN	O43852	Calumenin	CALU	G-6599_DMSO_30min	0.111686	0.109063	15.932	0.321112	0.878275	NA
CALX_HUMAN	P27824	Calnexin	CANX	G-6599_DMSO_30min	0.374242	0.385178	15.932	0.345767	0.890233	NA
CALX_HUMAN	P27824	Calnexin	CANX	G-6599_DMSO_60min	-0.171561	0.385178	15.932	0.662018	0.986136	NA
CAMLG_HUMAN	P49069	Calcium signal-modulating cyclophilin ligand	CAMLG	G-6599_DMSO_60min	-0.203176	0.128134	15.932	0.132464	0.934825	NA
CAMLG_HUMAN	P49069	Calcium signal-modulating cyclophilin ligand	CAMLG	G-6599_DMSO_30min	0.306782	0.128134	15.932	0.0293111	0.665304	NA
CAMP1_HUMAN	Q5T5Y3	Calmodulin-regulated spectrin-associated protein 1	CAMSAP1	G-6599_DMSO_60min	0.00936612	0.0815411	15.932	0.909988	0.996995	NA
CAMP1_HUMAN	Q5T5Y3	Calmodulin-regulated spectrin-associated protein 1	CAMSAP1	G-6599_DMSO_30min	-0.0893333	0.0815411	15.932	0.289556	0.870404	NA
CAMP2_HUMAN	Q08AD1	Calmodulin-regulated spectrin-associated protein 2	CAMSAP2	G-6599_DMSO_60min	-0.00147755	0.094023	15.932	0.987657	0.99975	NA
CAMP2_HUMAN	Q08AD1	Calmodulin-regulated spectrin-associated protein 2	CAMSAP2	G-6599_DMSO_30min	0.00670888	0.094023	15.932	0.944004	0.991979	NA
CAMP3_HUMAN	Q9P1Y5	Calmodulin-regulated spectrin-associated protein 3	CAMSAP3	G-6599_DMSO_60min	-0.0400809	0.0592521	15.932	0.508459	0.983099	NA
CAMP3_HUMAN	Q9P1Y5	Calmodulin-regulated spectrin-associated protein 3	CAMSAP3	G-6599_DMSO_30min	-0.0080045	0.0592521	15.932	0.894231	0.985529	NA
CAN10_HUMAN	Q9HC96	Calpain-10	CAPN10	G-6599_DMSO_60min	0.153761	0.0624838	15.932	0.0256672	0.89355	NA
CAN10_HUMAN	Q9HC96	Calpain-10	CAPN10	G-6599_DMSO_30min	0.013609	0.0624838	15.932	0.83035	0.972552	NA
CAN15_HUMAN	O75808	Calpain-15	CAPN15	G-6599_DMSO_60min	0.0480654	0.0884092	15.932	0.594196	0.986136	NA
CAN15_HUMAN	O75808	Calpain-15	CAPN15	G-6599_DMSO_30min	-0.0425466	0.0884092	15.932	0.636884	0.944526	NA
CAN2_HUMAN	P17655	Calpain-2 catalytic subunit	CAPN2	G-6599_DMSO_60min	0.10068	0.0838231	15.932	0.247266	0.957205	NA
CAN2_HUMAN	P17655	Calpain-2 catalytic subunit	CAPN2	G-6599_DMSO_30min	0.042987	0.0838231	15.932	0.615107	0.941633	NA
CAN5_HUMAN	O15484	Calpain-5	CAPN5	G-6599_DMSO_30min	0.0543349	0.110346	15.932	0.629149	0.944526	NA
CAN5_HUMAN	O15484	Calpain-5	CAPN5	G-6599_DMSO_60min	0.0444725	0.110346	15.932	0.692283	0.987921	NA
CAN7_HUMAN	Q9Y6W3	Calpain-7	CAPN7	G-6599_DMSO_30min	-0.0705892	0.0703916	15.932	0.330942	0.884121	NA
CAN7_HUMAN	Q9Y6W3	Calpain-7	CAPN7	G-6599_DMSO_60min	0.0842911	0.0703916	15.932	0.24864	0.957205	NA
CANB1_HUMAN	P63098	Calcineurin subunit B type 1	PPP3R1	G-6599_DMSO_30min	-0.0450315	0.0792011	15.932	0.577574	0.937019	NA
CANB1_HUMAN	P63098	Calcineurin subunit B type 1	PPP3R1	G-6599_DMSO_60min	0.0166471	0.0792011	15.932	0.836185	0.994708	NA
CAND1_HUMAN	Q86VP6	Cullin-associated NEDD8-dissociated protein 1	CAND1	G-6599_DMSO_30min	-0.0170085	0.0669276	15.932	0.802644	0.968565	NA
CAND1_HUMAN	Q86VP6	Cullin-associated NEDD8-dissociated protein 1	CAND1	G-6599_DMSO_60min	0.0189237	0.0669276	15.932	0.78101	0.994708	NA
CANT1_HUMAN	Q8WVQ1	Soluble calcium-activated nucleotidase 1	CANT1	G-6599_DMSO_30min	-0.0433209	0.131128	15.932	0.745424	0.958559	NA
CANT1_HUMAN	Q8WVQ1	Soluble calcium-activated nucleotidase 1	CANT1	G-6599_DMSO_60min	-0.192961	0.131128	15.932	0.160619	0.941362	NA
CAP1_HUMAN	Q01518	Adenylyl cyclase-associated protein 1	CAP1	G-6599_DMSO_60min	0.0632166	0.0514682	15.932	0.237184	0.957205	NA
CAP1_HUMAN	Q01518	Adenylyl cyclase-associated protein 1	CAP1	G-6599_DMSO_30min	-0.0663255	0.0514682	15.932	0.215913	0.853153	NA
CAP2_HUMAN	P40123	Adenylyl cyclase-associated protein 2	CAP2	G-6599_DMSO_60min	-0.00996808	0.075511	15.932	0.89663	0.996427	NA
CAP2_HUMAN	P40123	Adenylyl cyclase-associated protein 2	CAP2	G-6599_DMSO_30min	-0.0255069	0.075511	15.932	0.739931	0.958559	NA
CAPAM_HUMAN	Q9H4Z3	NA	NA	G-6599_DMSO_60min	0.0588366	0.13653	15.932	0.672284	0.987123	NA
CAPAM_HUMAN	Q9H4Z3	NA	NA	G-6599_DMSO_30min	-0.0849346	0.13653	15.932	0.542681	0.929449	NA
CAPG_HUMAN	P40121	Macrophage-capping protein	CAPG	G-6599_DMSO_30min	-0.0429602	0.0677642	15.932	0.5351	0.927849	NA
CAPG_HUMAN	P40121	Macrophage-capping protein	CAPG	G-6599_DMSO_60min	0.141985	0.0677642	15.932	0.0524822	0.907189	NA
CAPON_HUMAN	O75052	Carboxyl-terminal PDZ ligand of neuronal nitric oxide synthase protein	NOS1AP	G-6599_DMSO_30min	0.04331	0.0808492	15.932	0.599573	0.939563	NA
CAPON_HUMAN	O75052	Carboxyl-terminal PDZ ligand of neuronal nitric oxide synthase protein	NOS1AP	G-6599_DMSO_60min	0.0169484	0.0808492	15.932	0.836614	0.994708	NA
CAPR1_HUMAN	Q14444	Caprin-1	CAPRIN1	G-6599_DMSO_30min	-0.0889129	0.0891992	15.932	0.333766	0.885279	NA
CAPR1_HUMAN	Q14444	Caprin-1	CAPRIN1	G-6599_DMSO_60min	-0.0675313	0.0891992	15.932	0.46005	0.982449	NA
CAPS1_HUMAN	Q9ULU8	Calcium-dependent secretion activator 1	CADPS	G-6599_DMSO_30min	-0.138455	0.0689662	15.932	0.0619591	0.743939	NA
CAPS1_HUMAN	Q9ULU8	Calcium-dependent secretion activator 1	CADPS	G-6599_DMSO_60min	0.0306795	0.0689662	15.932	0.662413	0.986136	NA
CAPZB_HUMAN	P47756	F-actin-capping protein subunit beta	CAPZB	G-6599_DMSO_30min	0.0859057	0.0750981	15.932	0.269557	0.870404	NA
CAPZB_HUMAN	P47756	F-actin-capping protein subunit beta	CAPZB	G-6599_DMSO_60min	0.0454652	0.0750981	15.932	0.553433	0.983237	NA
CAR10_HUMAN	Q9BWT7	Caspase recruitment domain-containing protein 10	CARD10	G-6599_DMSO_30min	0.440334	0.206738	15.932	0.0491195	0.73288	NA
CAR10_HUMAN	Q9BWT7	Caspase recruitment domain-containing protein 10	CARD10	G-6599_DMSO_60min	-0.330398	0.206738	15.932	0.129651	0.934825	NA
CAR11_HUMAN	Q9BXL7	Caspase recruitment domain-containing protein 11	CARD11	G-6599_DMSO_30min	-0.14455	0.106533	15.932	0.193741	0.842726	NA
CAR11_HUMAN	Q9BXL7	Caspase recruitment domain-containing protein 11	CARD11	G-6599_DMSO_60min	0.141747	0.106533	15.932	0.20207	0.957205	NA
CAR19_HUMAN	Q96LW7	NA	NA	G-6599_DMSO_30min	-0.0749922	0.125399	15.932	0.558228	0.932853	NA
CAR19_HUMAN	Q96LW7	NA	NA	G-6599_DMSO_60min	-0.0694101	0.125399	15.932	0.587597	0.986136	NA
CARD8_HUMAN	Q9Y2G2	Caspase recruitment domain-containing protein 8	CARD8	G-6599_DMSO_30min	0.0240973	0.0893003	15.932	0.790743	0.965967	NA
CARD8_HUMAN	Q9Y2G2	Caspase recruitment domain-containing protein 8	CARD8	G-6599_DMSO_60min	-0.0264619	0.0893003	15.932	0.77081	0.994708	NA
CARF_HUMAN	Q9NXV6	CDKN2A-interacting protein	CDKN2AIP	G-6599_DMSO_60min	0.0660308	0.0950659	15.932	0.497324	0.983099	NA
CARF_HUMAN	Q9NXV6	CDKN2A-interacting protein	CDKN2AIP	G-6599_DMSO_30min	0.100449	0.0950659	15.932	0.306441	0.874319	NA
CARL1_HUMAN	Q5VZK9	NA	NA	G-6599_DMSO_30min	-0.119436	0.0766729	15.932	0.138937	0.826024	NA
CARL1_HUMAN	Q5VZK9	NA	NA	G-6599_DMSO_60min	0.15051	0.0766729	15.932	0.0673469	0.907189	NA
CARL2_HUMAN	Q6F5E8	NA	NA	G-6599_DMSO_30min	-0.208916	0.0888614	15.932	0.0319308	0.67765	NA
CARL2_HUMAN	Q6F5E8	NA	NA	G-6599_DMSO_60min	0.257004	0.0888614	15.932	0.010647	0.708216	NA
CARM1_HUMAN	Q86X55	Histone-arginine methyltransferase CARM1	CARM1	G-6599_DMSO_60min	0.147835	0.0802243	15.932	0.0840491	0.914593	NA
CARM1_HUMAN	Q86X55	Histone-arginine methyltransferase CARM1	CARM1	G-6599_DMSO_30min	-0.0324472	0.0802243	15.932	0.691255	0.954814	NA
CARME_HUMAN	Q8N4J0	NA	NA	G-6599_DMSO_30min	-0.281111	0.102512	15.932	0.0145053	0.575716	NA
CARME_HUMAN	Q8N4J0	NA	NA	G-6599_DMSO_60min	-0.0067549	0.102512	15.932	0.948282	0.997384	NA
CASC3_HUMAN	O15234	Protein CASC3	CASC3	G-6599_DMSO_60min	0.0886816	0.0929397	15.932	0.354245	0.973968	NA
CASC3_HUMAN	O15234	Protein CASC3	CASC3	G-6599_DMSO_30min	0.0188853	0.0929397	15.932	0.841551	0.973733	NA
CASP_HUMAN	Q13948	Protein CASP	CUX1	G-6599_DMSO_30min	-0.04149	0.0530834	15.932	0.44591	0.909483	NA
CASP_HUMAN	Q13948	Protein CASP	CUX1	G-6599_DMSO_60min	0.114769	0.0530834	15.932	0.0461771	0.907189	NA
CASP2_HUMAN	P42575	Caspase-2	CASP2	G-6599_DMSO_60min	0.0520136	0.0975107	15.932	0.60111	0.986136	NA
CASP2_HUMAN	P42575	Caspase-2	CASP2	G-6599_DMSO_30min	-0.278023	0.0975107	15.932	0.0115893	0.555867	NA
CASP3_HUMAN	P42574	Caspase-3	CASP3	G-6599_DMSO_30min	-0.152499	0.117473	15.932	0.212709	0.850467	NA
CASP3_HUMAN	P42574	Caspase-3	CASP3	G-6599_DMSO_60min	-0.0545944	0.117473	15.932	0.648406	0.986136	NA
CASP6_HUMAN	P55212	Caspase-6	CASP6	G-6599_DMSO_60min	0.0650846	0.0753157	15.932	0.400325	0.973968	NA
CASP6_HUMAN	P55212	Caspase-6	CASP6	G-6599_DMSO_30min	-0.02345	0.0753157	15.932	0.759567	0.958559	NA
CASP7_HUMAN	P55210	Caspase-7	CASP7	G-6599_DMSO_30min	-0.0882199	0.0598391	15.932	0.15989	0.833394	NA
CASP7_HUMAN	P55210	Caspase-7	CASP7	G-6599_DMSO_60min	0.0367167	0.0598391	15.932	0.548148	0.98316	NA
CASP8_HUMAN	Q14790	Caspase-8	CASP8	G-6599_DMSO_60min	-0.015869	0.0767157	15.932	0.838744	0.994708	NA
CASP8_HUMAN	Q14790	Caspase-8	CASP8	G-6599_DMSO_30min	0.00716213	0.0767157	15.932	0.926782	0.98789	NA
CASP8_HUMAN	Q14790-6	Caspase-8 (isoform 6)	CASP8	G-6599_DMSO_30min	-0.0136231	0.0610365	15.932	0.826219	0.97191	NA
[truncated: 15,721 more rows]
